# Supplementary material for: Evaluation of packing single and multiple atoms and molecules in the porous organic cage CC3-R
Source: Royal Society of Chemistry journal article supplement (doi:10.1039/d1cp01934a), 2021-01-01
Supplement: d1cp01934a1.pdf [file d1cp01934a1.pdf]

## SUPPORTING INFORMATION

Evaluation of Packing Single and Multiple Atoms and Molecule in the Porous Organic

Cage **CC3-R**

Nida A. McKee and Michael L. McKee\*

Department of Chemistry and Biochemistry, Auburn, AL 36849 USA

Table S1. 3 pages

Table S2. 3 pages

Table S3. 251 pages

Table S1. More complete Table 1 with Point Groups, Relative Energies (kcal/mol), Enthalpies (kcal/mol), and Free Energies (kcal/mol) with Respect to **CC3-R** and Varies Encapsulated Species per Unit<sup>a</sup>

|                                              | PG              | M06-2X/<br>6-31G(d) |        | B3LYP/6-31G(d,p)-D3BJ//M06-2X/6-31G(d) |                      |                      |                      |                      |                      |
|----------------------------------------------|-----------------|---------------------|--------|----------------------------------------|----------------------|----------------------|----------------------|----------------------|----------------------|
|                                              |                 | $\Delta E$          | BSSE/2 | $\Delta E+$<br>BSSE/2                  | $\Delta H$<br>(298K) | $\Delta G$<br>(100K) | $\Delta G$<br>(200K) | $\Delta G$<br>(300K) | $\Delta G$<br>(400K) |
| CH <sub>4</sub>                              | T <sub>d</sub>  |                     |        |                                        |                      |                      |                      |                      |                      |
| HCCl <sub>3</sub>                            | C <sub>3v</sub> |                     |        |                                        |                      |                      |                      |                      |                      |
| Xe                                           | K               |                     |        |                                        |                      |                      |                      |                      |                      |
| Kr                                           | K               |                     |        |                                        |                      |                      |                      |                      |                      |
| CO <sub>2</sub>                              | D <sub>ih</sub> |                     |        |                                        |                      |                      |                      |                      |                      |
| C <sub>2</sub> H <sub>2</sub>                | D <sub>ih</sub> |                     |        |                                        |                      |                      |                      |                      |                      |
| H <sub>2</sub> O                             |                 |                     |        |                                        |                      |                      |                      |                      |                      |
| SF <sub>6</sub>                              | O <sub>h</sub>  |                     |        |                                        |                      |                      |                      |                      |                      |
| 5- <sup>t</sup> Bu- <i>m</i> -xylene         | C <sub>s</sub>  |                     |        |                                        |                      |                      |                      |                      |                      |
| <b>CC3-R</b>                                 | T               |                     |        |                                        |                      |                      |                      |                      |                      |
| Xe@ <b>CC3</b>                               | T               | -7.73               | 2.39   | -10.66                                 | -10.33               | -8.56                | -6.79                | -5.02                | -3.24                |
| 3Xe@ <b>CC3</b>                              | C <sub>3</sub>  | -6.44               | 2.04   | -7.68                                  | -7.41                | -5.25                | -3.09                | -0.92                | 1.24                 |
| 4Xe@ <b>CC3</b>                              | T               | -6.64               | 1.53   | -8.17                                  | -8.42                | -6.27                | -4.13                | -1.98                | 0.17                 |
| 4Xe@ <b>CC3</b>                              | C <sub>1</sub>  | -6.66               | 1.53   | -8.17                                  | -7.88                | -5.67                | -3.45                | -1.24                | 0.97                 |
| 5Xe@ <b>CC3</b>                              | T               | -5.85               | 1.50   | -7.66                                  | -7.69                | -5.31                | -2.93                | -0.55                | 1.82                 |
| 5Xe@ <b>CC3</b>                              | C <sub>1</sub>  | -5.88               | 1.49   | -7.65                                  | -7.27                | -5.06                | -2.84                | -0.63                | 1.59                 |
| Kr@ <b>CC3</b>                               | T               | -4.40               | 1.24   | -6.75                                  | -6.42                | -4.15                | -1.88                | 0.39                 | 2.67                 |
| 4Kr@ <b>CC3</b>                              | T               | -4.45               | 0.94   | -6.04                                  | -5.81                | -3.62                | -1.43                | 0.76                 | 2.95                 |
| 5Kr@ <b>CC3</b>                              | T               | -3.85               | 0.89   | -5.56                                  | -5.25                | -3.15                | -1.04                | 1.07                 | 3.17                 |
| SF <sub>6</sub> @ <b>CC3</b> -TS             | C <sub>3</sub>  | -4.04               | 2.38   | -6.49                                  | -7.10                | -4.35                | -1.60                | 1.15                 | 3.91                 |
| SF <sub>6</sub> @ <b>CC3</b> -TS             | C <sub>1</sub>  | -6.07               | 3.53   | -7.91                                  | -7.08                | -4.16                | -1.24                | 1.69                 | 4.61                 |
| SF <sub>6</sub> @ <b>CC3</b>                 | T               | -9.74               | 4.53   | -15.32                                 | -14.25               | -11.90               | -9.56                | -7.21                | -4.86                |
| 4SF <sub>6</sub> @ <b>CC3</b>                | T               | -9.31               | 4.97   | -10.80                                 | -9.47                | -5.82                | -2.18                | 1.47                 | 5.12                 |
| 5SF <sub>6</sub> @ <b>CC3</b>                | T               | -10.07              | 4.31   | -13.64                                 | -12.72               | -9.57                | -6.41                | -3.26                | -0.10                |
| 5SF <sub>6</sub> @ <b>CC3</b>                | C <sub>3</sub>  | -10.25              | 4.31   | -13.27                                 | -11.92               | -8.52                | -5.12                | -1.73                | 1.67                 |
| (SF <sub>6</sub> ) <sub>4</sub> <sup>h</sup> | T               | -0.93               | 0.57   | -1.18                                  | -0.33                | 0.71                 | 1.75                 | 2.79                 | 5.02                 |
| (SF <sub>6</sub> ) <sub>5</sub> <sup>h</sup> | D <sub>2</sub>  | -1.96               | 1.30   | -1.47                                  | -0.67                | 0.97                 | 2.61                 | 4.25                 | 5.89                 |
| (SF <sub>6</sub> ) <sub>5</sub> <sup>h</sup> | C <sub>2</sub>  | -1.99               | 1.30   | -1.47                                  | -0.54                | 1.29                 | 3.12                 | 4.96                 | 6.79                 |
| CH <sub>4</sub> @ <b>CC3</b>                 | T               | -3.02               | 0.73   | -5.24                                  | -5.79                | -4.33                | -2.86                | -1.40                | 0.07                 |
| CH <sub>4</sub> @ <b>CC3</b>                 | C <sub>3</sub>  | -4.40               | 1.02   | -5.52                                  | -4.24                | -2.58                | -0.91                | 0.75                 | 2.42                 |
| 3CH <sub>4</sub> @ <b>CC3</b>                | C <sub>3</sub>  | -4.66               | 0.99   | -5.99                                  | -4.85                | -2.64                | -0.42                | 1.80                 | 4.01                 |
| 4CH <sub>4</sub> @ <b>CC3</b> -a             | T               | -4.57               | 1.01   | -6.02                                  | -5.74                | -3.62                | -1.50                | 0.62                 | 2.74                 |
| 4CH <sub>4</sub> @ <b>CC3</b> -b             | T               | -4.67               | 0.98   | -5.96                                  | -4.78                | -2.39                | -0.01                | 2.38                 | 4.76                 |
| 5CH <sub>4</sub> @ <b>CC3</b>                | T               | -5.10               | 0.92   | -5.88                                  | -5.06                | -2.10                | 0.86                 | 3.82                 | 6.78                 |
| 5CH <sub>4</sub> @ <b>CC3</b>                | C <sub>1</sub>  | -5.11               | 0.92   | -5.87                                  | -4.65                | -2.24                | 0.17                 | 2.58                 | 4.99                 |
| 6CH <sub>4</sub> @ <b>CC3</b>                | T               | -1.98               | 0.96   | -1.32                                  | -0.71                | 2.31                 | 5.33                 | 8.35                 | 11.37                |
| 6CH <sub>4</sub> @ <b>CC3</b>                | C <sub>1</sub>  | -2.00               | 0.96   | -1.33                                  | -0.01                | 2.87                 | 5.74                 | 8.74                 | 11.49                |
| CH <sub>4</sub> @ <b>CC3</b>                 | T               | -3.02               | 0.73   | -5.24                                  | -5.79                | -4.33                | -2.86                | -1.40                | 0.07                 |
| CO <sub>2</sub> @ <b>CC3</b> -a              | C <sub>3</sub>  | -6.06               | 1.42   | -8.88                                  | -9.18                | -7.30                | -5.42                | -3.54                | -1.66                |
| CO <sub>2</sub> @ <b>CC3</b> -b              | C <sub>2</sub>  | -7.02               | 1.81   | -6.51                                  | -5.51                | -3.13                | -0.75                | 1.62                 | 4.00                 |
| 4CO <sub>2</sub> @ <b>CC3</b> -a             | C <sub>2</sub>  | -7.57               | 1.70   | -8.46                                  | -7.69                | -4.80                | -1.91                | 0.98                 | 3.88                 |
| 4CO <sub>2</sub> @ <b>CC3</b> -b             | C <sub>1</sub>  | -8.63               | 1.67   | -8.43                                  | -7.51                | -4.45                | -1.40                | 1.65                 | 4.70                 |
| 6CO <sub>2</sub> @ <b>CC3</b> -a             | T               | -6.65               | 1.86   | -5.65                                  | -5.42                | -1.97                | 1.49                 | 4.95                 | 8.40                 |
| 6CO <sub>2</sub> @ <b>CC3</b> -b             | C <sub>3</sub>  | -8.29               | 1.71   | -7.86                                  | -7.15                | -3.87                | -0.58                | 2.71                 | 6.00                 |
| 6CO <sub>2</sub> @ <b>CC3</b> -c             | C <sub>1</sub>  | -8.97               | 1.66   | -8.64                                  | -7.73                | -4.49                | -1.26                | 1.97                 | 5.20                 |

|                                                            |                 |        |      |        |        |        |        |        |        |
|------------------------------------------------------------|-----------------|--------|------|--------|--------|--------|--------|--------|--------|
| (CO <sub>2</sub> ) <sub>4</sub> <sup>e</sup>               | S <sub>4</sub>  | -2.88  | 1.37 | -1.34  | -0.72  | 1.04   | 2.80   | 4.56   | 6.33   |
| (CO <sub>2</sub> ) <sub>6</sub> -a <sup>e</sup>            | T <sub>h</sub>  | -3.08  | 0.91 | -2.45  | -1.75  | 0.49   | 2.74   | 4.98   | 7.22   |
| (CO <sub>2</sub> ) <sub>6</sub> -b <sup>e</sup>            | C <sub>1</sub>  | -3.47  | 0.91 | -2.40  | -1.68  | 0.52   | 2.73   | 4.94   | 7.12   |
| (CO <sub>2</sub> ) <sub>6</sub> -c <sup>e</sup>            | S <sub>6</sub>  | -3.85  | 0.74 | -2.97  | -2.26  | 0.04   | 2.34   | 4.64   | 6.94   |
| (C <sub>2</sub> H <sub>2</sub> )@CC3                       | C <sub>3</sub>  | -5.67  | 1.63 | -7.08  | -6.14  | -4.27  | -2.39  | -0.52  | 1.35   |
| (C <sub>2</sub> H <sub>2</sub> ) <sub>4</sub> @CC3         | C <sub>2</sub>  | -7.82  | 1.49 | -9.70  | -8.62  | -5.73  | -2.85  | 0.04   | 2.93   |
| (C <sub>2</sub> H <sub>2</sub> ) <sub>6</sub> @CC3         | C <sub>3</sub>  | -3.28  | 1.49 | -3.98  | -3.15  | -0.09  | 2.96   | 6.01   | 9.07   |
| (C <sub>2</sub> H <sub>2</sub> ) <sub>4</sub> <sup>f</sup> | S <sub>4</sub>  | -2.35  | 0.56 | -2.35  | -2.01  | -0.25  | 1.50   | 3.26   | 5.02   |
| (C <sub>2</sub> H <sub>2</sub> ) <sub>4</sub> <sup>f</sup> | C <sub>1</sub>  | -2.35  | 0.55 | -2.42  | -1.76  | -0.19  | 1.38   | 2.95   | 4.52   |
| (C <sub>2</sub> H <sub>2</sub> ) <sub>6</sub> <sup>f</sup> | C <sub>3</sub>  | -2.39  | 0.74 | -3.01  | -2.26  | -0.37  | 1.52   | 3.41   | 5.30   |
| H <sub>2</sub> O@CC3                                       | C <sub>1</sub>  | -12.94 | 3.14 | -11.52 | -9.44  | -6.76  | -4.08  | -1.40  | 1.28   |
| 6H <sub>2</sub> O@CC3                                      | C <sub>1</sub>  | -16.83 | 1.31 | -17.00 | -15.11 | -11.65 | -8.20  | -4.75  | -1.29  |
| 8H <sub>2</sub> O@CC3                                      | C <sub>1</sub>  | -17.13 | 1.27 | -17.19 | -15.35 | -11.70 | -8.05  | -4.40  | -0.76  |
| 12H <sub>2</sub> O@CC3                                     | C <sub>3</sub>  | -18.53 | 1.54 | -18.31 | -16.35 | -12.62 | -8.89  | -5.16  | -1.43  |
| (H <sub>2</sub> O) <sub>6</sub> <sup>g</sup>               | C <sub>1</sub>  | -12.38 | 1.84 | -11.25 | -9.54  | -6.85  | -4.15  | -1.45  | 1.24   |
| (H <sub>2</sub> O) <sub>8</sub> <sup>g</sup>               | D <sub>2d</sub> | -14.28 | 1.87 | -13.53 | -11.79 | -8.82  | -5.86  | -2.89  | 0.08   |
| (H <sub>2</sub> O) <sub>12</sub> <sup>g</sup>              | D <sub>3</sub>  | -14.60 | 1.71 | -14.04 | -12.29 | -9.19  | -6.09  | -2.09  | 0.11   |
| (CC3-R) <sub>2</sub> w-to-w <sup>b</sup>                   | D <sub>3</sub>  | -25.17 | 7.64 | -33.95 | -32.28 | -26.39 | -20.50 | -14.61 | -8.72  |
| (CC3-R) <sub>2</sub> w-to-a <sup>b</sup>                   | C <sub>3</sub>  | -20.75 | 5.06 | -30.27 | -29.21 | -25.31 | -21.41 | -17.51 | -13.62 |
| (CC3-R) <sub>2</sub> a-to-a <sup>b</sup>                   | D <sub>3</sub>  | -14.19 | 5.26 | -23.08 | -24.02 | -20.20 | -16.37 | -12.55 | -8.72  |
| CC3-R/S w-to-w <sup>b</sup>                                | S <sub>6</sub>  | -29.41 | 7.26 | -39.75 | -38.03 | -33.12 | -28.21 | -23.30 | -18.39 |
| Xe@w-to-w-a <sup>c</sup>                                   | C <sub>3</sub>  | -8.13  | 2.44 | -10.97 | -10.47 | -8.72  | -6.96  | -5.21  | -3.46  |
| Xe@w-to-w TS                                               | C <sub>3</sub>  | -6.38  | 1.87 | -9.39  | -10.01 | -7.46  | -4.91  | -2.36  | 0.19   |
| Xe@w-to-w-b <sup>d</sup>                                   | D <sub>3</sub>  | -7.44  | 1.87 | -10.86 | -10.54 | -8.52  | -6.49  | -4.47  | -2.44  |
| 3Xe@w-to-w                                                 | D <sub>3</sub>  | -8.06  | 1.89 | -10.74 | -10.45 | -8.38  | -6.31  | -4.25  | -2.18  |
| Xe@w-to-w(R/S)                                             | S <sub>6</sub>  | -8.22  | 2.01 | -11.51 | -11.35 | -9.44  | -7.53  | -5.62  | -3.71  |
| Diphenylether                                              | C <sub>2</sub>  |        |      |        |        |        |        |        |        |
| Dimesitylether                                             | C <sub>2</sub>  |        |      |        |        |        |        |        |        |
| Octachloropropane                                          | C <sub>2v</sub> |        |      |        |        |        |        |        |        |
| Hexachloropropene                                          | C <sub>s</sub>  |        |      |        |        |        |        |        |        |
| Benzylbenzoate                                             | C <sub>1</sub>  |        |      |        |        |        |        |        |        |
| Tetrachloroethene                                          | D <sub>2h</sub> |        |      |        |        |        |        |        |        |
| 15-Crown-5 <sup>i</sup>                                    | D <sub>5</sub>  | 10.90  |      | 8.47   | 6.35   | 8.59   | 10.83  | 13.08  | 15.32  |
| 15-Crown-5 <sup>i</sup>                                    | C <sub>1</sub>  | 0.00   |      | 0.00   | 0.00   | 0.00   | 0.00   | 0.00   | 0.00   |
| Mesitylene                                                 | C <sub>3v</sub> |        |      |        |        |        |        |        |        |
| HCCl <sub>3</sub> @CC3                                     | C <sub>1</sub>  | -11.35 | 2.27 | -16.70 | -15.34 | -12.41 | -9.48  | -6.55  | -3.62  |
| Diphenylether@CC3                                          | C <sub>2</sub>  | -12.74 | 6.34 | -13.73 | -12.61 | -7.01  | -1.40  | 4.21   | 9.82   |
| Dimesitylether@CC3                                         | C <sub>2</sub>  | 19.61  | 7.71 | 14.51  | 16.58  | 24.25  | 31.91  | 39.58  | 47.24  |
| Octachloropropane@CC3                                      | C <sub>1</sub>  | 4.73   | 4.54 | 0.90   | 1.15   | 6.40   | 11.66  | 16.91  | 22.17  |
| Hexachloropropene@CC3                                      | C <sub>1</sub>  | -10.44 | 4.26 | -14.92 | -14.04 | -9.10  | -4.16  | 0.78   | 5.72   |
| Benzylbenzoate@CC3-a                                       | C <sub>1</sub>  | -20.02 | 6.66 | -25.82 | -24.58 | -18.97 | -13.35 | -7.73  | -2.11  |
| Benzylbenzoate@CC3-b                                       | C <sub>1</sub>  | -20.69 | 6.68 | -24.65 | -23.30 | -17.69 | -12.07 | -6.46  | -0.84  |
| Tetrachloroethene@CC3                                      | C <sub>1</sub>  | -10.19 | 2.82 | -13.83 | -12.74 | -9.07  | -5.41  | -1.74  | 1.92   |
| 15-Crown-5@CC3                                             | C <sub>1</sub>  | 2.84   | 7.88 | 2.29   | 4.08   | 9.93   | 15.78  | 21.63  | 27.49  |
| Mesitylene@CC3                                             | C <sub>3</sub>  | -16.79 | 4.55 | -23.29 | -23.27 | -18.55 | -13.83 | -9.11  | -4.40  |
| Mesitylene@CC3                                             | C <sub>1</sub>  | -17.44 | 4.59 | -22.99 | -21.87 | -17.54 | -13.22 | -8.89  | -4.57  |
| Mesitylene@CC3-TS                                          | C <sub>1</sub>  | 5.12   | 4.48 | 2.51   | 3.47   | 8.92   | 14.37  | 19.82  | 25.27  |
| 5- <sup>i</sup> Bu- <i>m</i> -xylene@CC3                   | C <sub>1</sub>  | -17.24 | 5.81 | -20.82 | -19.36 | -13.56 | -7.76  | -1.95  | 3.85   |
| CC3-R-a(+) <sup>j</sup>                                    | D <sub>2</sub>  | 184.68 | 0.00 | 164.42 | 158.84 | 157.99 | 157.13 | 156.27 | 155.41 |

|                                |                 |        |      |        |        |        |        |        |        |
|--------------------------------|-----------------|--------|------|--------|--------|--------|--------|--------|--------|
| <b>CC3-R-b(+)</b> <sup>j</sup> | C <sub>2</sub>  | 183.98 | 0.00 | 165.70 | 162.73 | 162.38 | 162.02 | 161.66 | 161.30 |
| 3I@CC3-a                       | C <sub>2</sub>  | -2.62  | 1.30 | -6.12  | -5.77  | -4.26  | -2.75  | -1.23  | 0.28   |
| 3I@CC3-b                       | C <sub>1</sub>  | -3.50  | 1.31 | -7.47  | -6.95  | -5.52  | -4.09  | -2.66  | -1.23  |
| 5I@CC3                         | C <sub>2</sub>  | -4.74  | 1.14 | -8.92  | -8.47  | -6.93  | -5.39  | -3.85  | -2.32  |
| 7I@CC3                         | C <sub>1</sub>  | -5.32  | 1.02 | -9.04  | -8.60  | -7.05  | -5.49  | -3.94  | -2.38  |
| 9I@CC3                         | C <sub>2</sub>  | -5.49  | 0.93 | -8.88  | -8.45  | -6.88  | -5.32  | -3.75  | -2.18  |
| I <sub>2</sub>                 | D <sub>ih</sub> | 0.0    | 0.00 | 0.00   | 0.00   | 0.00   | 0.00   | 0.00   | 0.00   |
| I <sub>3</sub>                 | D <sub>ih</sub> | 5.43   | 0.00 | 2.13   | 2.39   | 2.97   | 3.55   | 4.13   | 4.71   |
| I <sub>3</sub> (-)             | D <sub>ih</sub> | -32.85 | 0.00 | -33.88 | -33.73 | -32.28 | -32.83 | -32.37 | -31.92 |
| I <sub>5</sub>                 | C <sub>1</sub>  | 1.16   | 0.00 | -0.28  | -0.08  | 0.45   | 0.99   | 1.52   | 2.05   |
| I <sub>5</sub> (-)             | C <sub>2v</sub> | -24.53 | 0.00 | -24.29 | -24.28 | -24.11 | -23.95 | -23.78 | -23.61 |
| I <sub>7</sub>                 | C <sub>1</sub>  | -0.08  | 0.00 | -1.33  | -1.05  | -0.28  | 0.50   | 1.28   | 2.06   |
| I <sub>7</sub> (-)             | C <sub>3v</sub> | -18.47 | 0.00 | -19.63 | -19.36 | -18.52 | -17.68 | -16.84 | -16.00 |
| I <sub>9</sub>                 | C <sub>2</sub>  | -0.80  | 0.00 | -1.96  | -1.64  | -0.73  | 0.19   | 1.11   | 2.03   |
| I <sub>9</sub> (-)             | T <sub>d</sub>  | -15.43 | 0.00 | -16.51 | -16.20 | -15.31 | -14.43 | -13.54 | -12.66 |

- a) All species are optimized at the M06-2X/6-31G(d) level. Values are on a per enclosed atom or per enclosed molecule basis. For iodine-containing species, the values are per iodine atom but the reference is relative to the number of I<sub>2</sub> units (i.e. 1/9 of the reactions 4.5I<sub>2</sub> + CC3 → 9I@CC3 and 4.5I<sub>2</sub> → I<sub>9</sub>(-)). The Kr/Xe/I atoms were described with the small-core Stuttgart pseudopotential (SDD(Kr/Xe/I)) at the M06-2X/6-31G(d) and B3LYP-D3BJ/6-31G(d,p) levels.
- b) Thermodynamic values for the dimerization of two units of CC3.
- c) Xe is in the intrinsic cavity (side cavity).
- d) Xe is in the extrinsic cavity (middle cavity).
- e) Binding of cluster on a per CO<sub>2</sub> molecule basis.
- f) Binding of cluster on a per C<sub>2</sub>H<sub>2</sub> molecule basis
- g) Binding of cluster on a per H<sub>2</sub>O molecule basis.
- h) Binding of cluster on a per SF<sub>6</sub> molecule basis
- i) Thermodynamic values for D<sub>5</sub>-symmetry structure of 15-crown-5 relative to the C<sub>1</sub>-symmetry structure.
- j) Thermodynamic values for CC3-R(+) radical cation are relative to neutral CC3-R. The D<sub>2</sub>-symmetry species had one imaginary frequency which lead to a C<sub>2</sub>-symmetry species 0.7 kcal/mol lower in energy at the M06-2X/6-31G(d) level. However, the D<sub>2</sub>-symmetry species was 3.9 kcal/mol more stable in enthalpy (298K) at the standard level of theory.

Table S2. Point Groups, Absolute Energies (Hartrees) , Zero-Point Energies (kcal/mol), Number of Imaginary Frequencies, Capacity Corrections (kcal/mol) , and Entropies (cal/mol-K) for Various Species

|                                      | PG              | label       | M06-2X/6-31G(d) |            |          |                     | B3LYP/6-31G(d,p)-D3BJ |
|--------------------------------------|-----------------|-------------|-----------------|------------|----------|---------------------|-----------------------|
|                                      |                 |             | E               | ZPE(NIF)   | Cp(298K) | S                   | //M06-2X/6-31G(d)     |
| CH <sub>4</sub>                      | T <sub>d</sub>  | cc3-ch4     | -40.482038      | 28.65(0)   | 2.39     | 44.46               | -40.525925            |
| CCl <sub>3</sub>                     | C <sub>3v</sub> | cc3-hccl3   | -1419.164297    | 12.84(0)   | 3.35     | 70.38               | -1419.290168          |
| Xe                                   | K               | cc3-xe      | -15.478947      | 0.00(0)    | 1.48     | 40.54               | -15.539459            |
| Kr                                   | K               | cc3-kr      | -18.335064      | 0.00(0)    | 1.48     | 39.20               | -18.393871            |
| CO <sub>2</sub>                      | D <sub>ih</sub> | cc3-co2     | -188.509012     | 7.47(0)    | 2.24     | 51.08               | -188.582410           |
| C <sub>2</sub> H <sub>2</sub>        | D <sub>ih</sub> | cc3-rc      | -77.287780      | 17.18(0)   | 2.35     | 47.79               | -77.331811            |
| H <sub>2</sub> O                     | C <sub>2v</sub> | cc3-h2o     | -76.373394      | 13.52(0)   | 2.37     | 45.11               | -76.420301            |
| SF <sub>6</sub>                      | O <sub>h</sub>  | cc3-sf6     | -996.886328     | 13.73(0)   | 4.05     | 69.82               | -997.113170           |
| 15-Crown-5                           | D <sub>5</sub>  | crown4      | -768.797011     | 197.23(4)  | 8.15     | 101.44              | -769.209431           |
| 15-Crown-5                           | C <sub>1</sub>  | crown22     | -768.814389     | 197.32(0)  | 10.18    | 123.87              | -769.222922           |
| Mesitylene                           | C <sub>3v</sub> | cc3-mes2    | -350.026733     | 116.22(0)  | 6.74     | 96.09               | -350.254567           |
| 5- <sup>t</sup> Bu- <i>m</i> -xylene | C <sub>s</sub>  | cc3-dpe10   | -467.907245     | 170.35(0)  | 9.01     | 114.94              | -468.219820           |
| <b>CC3-R</b>                         | T               | cc3-r       | -3449.811797    | 920.39(0)  | 45.99    | 378.78              | -3451.781546          |
|                                      |                 |             |                 |            |          |                     |                       |
| Xe@CC3                               | T               | cc3-xex     | -3465.303060    | 920.51(0)  | 47.68    | 401.59              | -3467.341808          |
| 3Xe@CC3                              | C <sub>3</sub>  | cc3-rcj     | -3496.279406    | 920.86(0)  | 50.76    | 435.50              | -3498.446400          |
| 4Xe@CC3                              | T               | cc3-rc      | -3511.769899    | 920.53(3)  | 50.80    | 455.08 <sup>a</sup> | -3514.001263          |
| 4Xe@CC3                              | C <sub>1</sub>  | cc3-rcx     | -3511.770034    | 921.20(0)  | 52.30    | 452.50              | -3514.001264          |
| 5Xe@CC3                              | T               | cc3-xexx    | -3527.253181    | 921.51(3)  | 52.11    | 462.54 <sup>a</sup> | -3529.551781          |
| 5Xe@CC3                              | C <sub>1</sub>  | cc3-xexxqq  | -3527.253376    | 921.92(0)  | 53.73    | 470.72              | -3529.551652          |
| Kr@CC3                               | T               | cc3-krx     | -3468.153873    | 920.61(0)  | 47.58    | 395.27              | -3470.188150          |
| 4Kr@CC3                              | T               | cc3-re      | -3523.180444    | 920.74(0)  | 52.49    | 447.99              | -3525.401513          |
| 5Kr@CC3                              | T               | cc3-krxx    | -3541.517783    | 921.25(0)  | 54.07    | 469.43              | -3543.802298          |
|                                      |                 |             |                 |            |          |                     |                       |
| SF <sub>6</sub> @CC3-TS              | C <sub>3</sub>  | cc3-rsf6ts  | -4446.704542    | 934.20(3)  | 49.32    | 421.07 <sup>b</sup> | -4448.908850          |
| SF <sub>6</sub> @CC3-TS              | C <sub>1</sub>  | cc3-rsf6ty  | -4446.707802    | 934.70(1)  | 50.29    | 419.36              | -4448.912943          |
| SF <sub>6</sub> @CC3                 | T               | cc3-rsf6c   | -4446.713646    | 934.24(0)  | 50.99    | 425.13              | -4448.926350          |
| 4SF <sub>6</sub> @CC3                | T               | cc3-rsf6by  | -7437.416486    | 978.51(0)  | 64.34    | 512.21              | -7440.334772          |
| 5SF <sub>6</sub> @CC3                | T               | cc3-rsf6bx  | -8434.323681    | 992.27(3)  | 67.62    | 570.11 <sup>a</sup> | -8437.490427          |
| 5SF <sub>6</sub> @CC3                | C <sub>3</sub>  | cc3-rsf6bxx | -8434.325076    | 992.95(0)  | 69.09    | 558.01              | -8437.487444          |
| (SF <sub>6</sub> ) <sub>4</sub>      | T               | cc3-sf6bby  | -3987.551264    | 55.27(0)   | 19.29    | 237.77              | -3988.463895          |
| (SF <sub>6</sub> ) <sub>5</sub>      | D <sub>2</sub>  | cc3-sf6bb   | -4984.447231    | 69.70(1)   | 23.22    | 267.16 <sup>a</sup> | -4985.587925          |
| (SF <sub>6</sub> ) <sub>5</sub>      | C <sub>2</sub>  | cc3-sf6bbx  | -4984.447462    | 69.94(0)   | 23.61    | 257.46              | -4985.587925          |
|                                      |                 |             |                 |            |          |                     |                       |
| CH <sub>4</sub> @CC3                 | T               | cc3-raa     | -3490.298654    | 949.70(3)  | 47.17    | 408.59 <sup>a</sup> | -3492.316986          |
| CH <sub>4</sub> @CC3                 | C <sub>3</sub>  | cc3-raax    | -3490.300842    | 949.91(0)  | 48.80    | 406.60              | -3492.317898          |
| 3CH <sub>4</sub> @CC3                | C <sub>3</sub>  | cc3-rbb     | -3571.280207    | 1008.90(0) | 54.01    | 445.65              | -3573.392710          |
| 4CH <sub>4</sub> @CC3-a              | T               | cc3-ra      | -3611.769049    | 1037.98(6) | 53.68    | 471.76 <sup>a</sup> | -3613.930046          |
| 4CH <sub>4</sub> @CC3-b              | T               | cc3-rb      | -3611.769721    | 1038.79(0) | 56.46    | 461.18              | -3613.929442          |
| 5CH <sub>4</sub> @CC3                | T               | cc3-raaq    | -3652.262628    | 1069.08(3) | 56.57    | 469.44 <sup>a</sup> | -3654.465330          |
| 5CH <sub>4</sub> @CC3                | C <sub>1</sub>  | cc3-raarr   | -3652.262705    | 1069.18(0) | 58.48    | 480.64              | -3654.465212          |
| 6CH <sub>4</sub> @CC3                | T               | cc3-roo     | -3692.722974    | 1099.87(6) | 56.40    | 464.24 <sup>a</sup> | -3694.958912          |
| 6CH <sub>4</sub> @CC3                | C <sub>1</sub>  | cc3-rooxx   | -3692.723177    | 1101.24(0) | 59.29    | 473.11              | -3694.958966          |
|                                      |                 |             |                 |            |          |                     |                       |
| CO <sub>2</sub> @CC3-a               | C <sub>3</sub>  | cc3-rco2    | -3638.330464    | 928.04(2)  | 47.75    | 411.06 <sup>a</sup> | -3640.380371          |
| CO <sub>2</sub> @CC3-b               | C <sub>2</sub>  | cc3-rj0     | -3638.332003    | 928.56(0)  | 48.54    | 406.08              | -3640.377217          |

|                                                    |                 |            |              |            |       |                     |              |
|----------------------------------------------------|-----------------|------------|--------------|------------|-------|---------------------|--------------|
| 4CO <sub>2</sub> @CC3-a                            | C <sub>2</sub>  | cc3-rjj    | -4203.896077 | 952.80(1)  | 55.53 | 467.48 <sup>a</sup> | -4206.175999 |
| 4CO <sub>2</sub> @CC3-b                            | C <sub>1</sub>  | cc3-rj     | -4203.902830 | 953.08(0)  | 55.82 | 461.01              | -4206.175562 |
| 6CO <sub>2</sub> @CC3-a                            | T               | cc3-rjjj   | -4580.929456 | 969.16(6)  | 56.88 | 477.92 <sup>a</sup> | -4583.347875 |
| 6CO <sub>2</sub> @CC3-b                            | C <sub>3</sub>  | cc3-rtt    | -4580.945124 | 969.72(2)  | 59.17 | 487.96 <sup>a</sup> | -4583.367497 |
| 6CO <sub>2</sub> @CC3-c                            | C <sub>1</sub>  | cc3-rt     | -4580.951602 | 969.79(0)  | 60.35 | 491.29              | -4583.374558 |
| (CO <sub>2</sub> ) <sub>4</sub>                    | S <sub>4</sub>  | cc3-rjjx   | -754.054402  | 31.43(0)   | 9.85  | 133.80              | -754.346893  |
| (CO <sub>2</sub> ) <sub>6</sub> -a                 | T <sub>h</sub>  | cc3-rjjjx  | -1131.083530 | 47.36(0)   | 15.07 | 171.85              | -1131.526607 |
| (CO <sub>2</sub> ) <sub>6</sub> -b                 | C <sub>1</sub>  | cc3-rtx    | -1131.087289 | 47.76(0)   | 14.82 | 174.10              | -1131.526174 |
| (CO <sub>2</sub> ) <sub>6</sub> -c                 | S <sub>6</sub>  | cc3-rtxx   | -1131.090894 | 47.85(0)   | 14.72 | 168.55              | -1131.529972 |
|                                                    |                 |            |              |            |       |                     |              |
| (C <sub>2</sub> H <sub>2</sub> )@CC3               | C <sub>3</sub>  | rco2cc     | -3527.108606 | 937.99(0)  | 48.87 | 407.84              | -3529.127246 |
| (C <sub>2</sub> H <sub>2</sub> ) <sub>4</sub> @CC3 | C <sub>2</sub>  | rjjcc      | -3759.012780 | 993.20(0)  | 55.60 | 454.46              | -3761.180088 |
| (C <sub>2</sub> H <sub>2</sub> ) <sub>6</sub> @CC3 | C <sub>3</sub>  | rjjcc      | -3913.569792 | 1028.70(0) | 59.87 | 482.32              | -3915.824648 |
| (C <sub>2</sub> H <sub>2</sub> ) <sub>4</sub>      | S <sub>4</sub>  | rjjcex     | -309.166079  | 70.31(2)   | 9.17  | 120.85              | -309.345810  |
| (C <sub>2</sub> H <sub>2</sub> ) <sub>4</sub>      | C <sub>1</sub>  | rjjcey     | -309.166371  | 70.68(0)   | 10.07 | 128.38              | -309.346166  |
| (C <sub>2</sub> H <sub>2</sub> ) <sub>6</sub>      | C <sub>3</sub>  | rjjcex     | -463.754526  | 106.25(0)  | 15.41 | 173.24              | -464.026688  |
|                                                    |                 |            |              |            |       |                     |              |
| H <sub>2</sub> O@CC3                               | C <sub>1</sub>  | cc3-ww00   | -3526.205816 | 936.54(0)  | 47.81 | 397.07              | -3528.225206 |
| 6H <sub>2</sub> O@CC3                              | C <sub>1</sub>  | cc3-www    | -3908.213104 | 1018.17(0) | 54.91 | 442.16              | -3910.478440 |
| 8H <sub>2</sub> O@CC3                              | C <sub>1</sub>  | cc3-wwb    | -4061.017381 | 1051.69(0) | 56.57 | 447.89              | -4063.379253 |
| 12H <sub>2</sub> O@CC3                             | C <sub>3</sub>  | cc3-wwc    | -4366.646886 | 1118.94(0) | 61.63 | 472.42              | -4369.204766 |
| (H <sub>2</sub> O) <sub>6</sub>                    | C <sub>1</sub>  | cc3-www1   | -458.358758  | 96.69(0)   | 8.91  | 108.83              | -458.647013  |
| (H <sub>2</sub> O) <sub>8</sub>                    | D <sub>2d</sub> | cc3-wwb1   | -611.169245  | 129.76(0)  | 11.32 | 123.60              | -611.558716  |
| (H <sub>2</sub> O) <sub>12</sub>                   | D <sub>3</sub>  | cc3-wwc1   | -916.759862  | 194.39(0)  | 17.38 | 169.53              | -917.344922  |
|                                                    |                 |            |              |            |       |                     |              |
| (CC3-R) <sub>2</sub> w-to-w                        | D <sub>3</sub>  | cc3-rdim   | -6899.663698 | 1842.48(0) | 91.95 | 698.66              | -6903.629369 |
| (CC3-R) <sub>2</sub> w-to-a                        | C <sub>3</sub>  | cc3-rdim6  | -6899.656664 | 1841.18(0) | 92.65 | 718.58              | -6903.619398 |
| (CC3-R) <sub>2</sub> a-to-a                        | D <sub>3</sub>  | cc3-rdim9  | -6899.646206 | 1840.25(2) | 91.57 | 719.31 <sup>a</sup> | -6903.608255 |
| CC3-R/S w-to-w                                     | S <sub>6</sub>  | cc3-rdim4  | -6899.670462 | 1842.22(0) | 92.27 | 708.47              | -6903.638014 |
| Xe@w-to-w-a                                        | C <sub>3</sub>  | cc3-rdim33 | -            | 1842.76(0) | 93.65 | 721.67              | -6919.190198 |
| Xe@w-to-w TS                                       | C <sub>3</sub>  | cc3-rdim10 | -6915.152814 | 1842.22(1) | 93.07 | 713.68              | -6919.186775 |
| Xe@w-to-w-b                                        | D <sub>3</sub>  | cc3-rdim2  | -6915.154499 | 1842.59(0) | 93.64 | 718.94              | -6919.189116 |
| 3Xe@w-to-w                                         | D <sub>3</sub>  | cc3-rdim3  | -6946.139084 | 1842.85(0) | 96.91 | 758.29              | -6950.308158 |
| Xe@w-to-w (R/S)                                    | S <sub>6</sub>  | cc3-rdim5  | -6915.162510 | 1842.21(0) | 93.93 | 729.92              | -6919.199030 |
| (CC3-R) <sub>2</sub> w-to-w                        | D <sub>3</sub>  | cc3-rdim   | -6899.663698 | 1842.48(0) | 91.95 | 698.66              | -6903.629369 |
|                                                    |                 |            |              |            |       |                     |              |
| Diphenylether                                      | C <sub>2</sub>  | cc3-dpe    | -538.281307  | 117.77(0)  | 6.79  | 99.51               | -538.574393  |
| Dimesitylether                                     | C <sub>2</sub>  | cc3-dpe2   | -774.064104  | 223.32(0)  | 13.14 | 145.91              | -774.531358  |
| Octachloropropane                                  | C <sub>2v</sub> | cc3-dpe4   | -3795.527670 | 17.40(0)   | 8.40  | 112.01              | -3795.846681 |
| Hexachloropropene                                  | C <sub>s</sub>  | cc3-dpe6   | -2875.200045 | 15.53(0)   | 6.83  | 102.47              | -2875.454120 |
| Benzylbenzoate                                     | C <sub>1</sub>  | cc3-dpe8   | -690.887714  | 143.00(0)  | 8.80  | 119.32              | -691.253809  |
| Tetrachloroethene                                  | D <sub>2h</sub> | cc3-dpe12  | -1916.796865 | 9.99(0)    | 4.62  | 81.12               | -1916.966755 |
| Mesitylene                                         | C <sub>3v</sub> | cc3-mes2   | -350.026733  | 116.22(0)  | 6.74  | 96.09               | -350.254567  |
| CCl <sub>3</sub> @CC3                              | C <sub>1</sub>  | cc3-recl33 | -4868.994180 | 933.97(0)  | 49.96 | 419.84              | -4871.101958 |
| Diphenylether@CC3                                  | C <sub>2</sub>  | cc3-dpe1   | -3988.113402 | 1039.58(0) | 52.49 | 422.22              | -3990.387932 |
| Dimesitylether@CC3                                 | C <sub>2</sub>  | cc3-dpe3   | -4223.844652 | 1147.44(0) | 57.48 | 448.04              | -4226.302068 |
| Octachloropropane@CC3                              | C <sub>1</sub>  | cc3-dpe5   | -7245.331934 | 938.08(0)  | 54.35 | 438.23              | -7247.634032 |
| Hexchloropropene@CC3                               | C <sub>1</sub>  | cc3-dpe77  | -6325.028477 | 936.66(0)  | 52.97 | 431.85              | -6327.266234 |
| Benzylbenzoate@CC3-a                               | C <sub>1</sub>  | cc3-dpe9   | -4140.731410 | 1064.83(0) | 54.59 | 441.92              | -4143.087122 |
| Benzylbenzoate@CC3-b                               | C <sub>1</sub>  | cc3-dpe999 | -4140.732484 | 1064.98(0) | 54.55 | 441.95              | -4143.085287 |
| Tetrachloroethene@CC3                              | C <sub>1</sub>  | cc3-dpe133 | -5366.624901 | 931.06(0)  | 51.03 | 423.24              | -5368.774839 |
| 15-Crown-5@CC3                                     | C <sub>1</sub>  | cc3-crown  | -4218.621655 | 1120.14(0) | 55.53 | 444.13              | -4221.013366 |

|                                          |                 |            |              |            |       |                     |              |
|------------------------------------------|-----------------|------------|--------------|------------|-------|---------------------|--------------|
| Mesitylene@CC3                           | C <sub>3</sub>  | cc3-mes3   | -3799.865290 | 1038.01(2) | 51.36 | 427.70 <sup>a</sup> | -3802.080482 |
| Mesitylene@CC3                           | C <sub>1</sub>  | cc3-mes4   | -3799.866330 | 1038.45(0) | 51.85 | 420.35              | -3802.039252 |
| Mesitylene@CC3-TS                        | C <sub>1</sub>  | cc3-mes3tu | -3799.830374 | 1037.87(1) | 52.60 | 431.62              | -3802.080071 |
| 5- <sup>t</sup> Bu- <i>m</i> -xylene@CC3 | C <sub>1</sub>  | cc3-dpe11  | -3917.746511 | 1092.73(0) | 54.47 | 435.68              | -3920.043811 |
|                                          |                 |            |              |            |       |                     |              |
| CC3- <i>R</i> -a(+)                      | D <sub>2</sub>  | cc3-trad   | -3449.517481 | 914.35(1)  | 46.46 | 387.36              | -3451.519526 |
| CC3- <i>R</i> -b(+)                      | C <sub>2</sub>  | cc3-raddx  | -3449.518599 | 917.49(1)  | 45.93 | 382.35              | -3451.517485 |
| 3I@CC3-a                                 | C <sub>2</sub>  | cc3-i3a    | -3483.919368 | 921.77(1)  | 49.78 | 427.30 <sup>a</sup> | -3486.074115 |
| 3I@CC3-b                                 | C <sub>1</sub>  | cc3-i3     | -3483.923558 | 921.52(0)  | 50.49 | 429.78              | -3486.080652 |
| 5I@CC3                                   | C <sub>2</sub>  | cc3-i5     | -3506.674608 | 921.94(0)  | 53.46 | 458.41              | -3508.956855 |
| 7I@CC3                                   | C <sub>1</sub>  | cc3-i7     | -3529.426210 | 922.52(0)  | 56.42 | 489.04              | -3531.826996 |
| 9I@CC3                                   | C <sub>2</sub>  | cc3-i9a    | -3552.175669 | 923.04(0)  | 59.43 | 519.48              | -3554.693533 |
| I <sub>2</sub>                           | D <sub>ih</sub> | cc3-i5c    | -22.730028   | 0.28(0)    | 2.43  | 62.61               | -22.838062   |
| I <sub>3</sub>                           | D <sub>ih</sub> | cc3-i3c    | -34.069074   | 1.34(0)    | 3.51  | 76.53               | -34.246902   |
| I <sub>3</sub> (-)                       | D <sub>ih</sub> | cc3-i3b    | -34.252091   | 0.51(0)    | 3.98  | 80.29               | -34.419048   |
| I <sub>5</sub>                           | C <sub>1</sub>  | cc3-i5aa   | -56.815849   | 0.85(0)    | 6.43  | 129.82              | -57.097419   |
| I <sub>5</sub> (-)                       | C <sub>2v</sub> | cc3-i5b    | -57.011325   | 1.01(0)    | 6.78  | 121.33              | -57.290934   |
| I <sub>7</sub>                           | C <sub>1</sub>  | cc3-i7c    | -79.555973   | 1.39(0)    | 10.00 | 164.72              | -79.948025   |
| I <sub>7</sub> (-)                       | C <sub>3v</sub> | cc3-i7b    | -79.761107   | 1.48(0)    | 9.91  | 160.42              | -80.152226   |
| I <sub>9</sub>                           | C <sub>s</sub>  | cc3-i9c    | -102.296586  | 1.91(0)    | 13.08 | 199.14              | -102.799332  |
| I <sub>9</sub> (-)                       | T <sub>d</sub>  | cc3-i9b    | -102.506448  | 1.91(0)    | 13.08 | 202.08              | -103.008068  |

- a) The structure had one or more imaginary frequencies which were not included for the calculation of zero-point energy, heat capacity correction or entropy. The entropy value in this table was increased by an amount equal to the contribution the imaginary frequencies would make if they were real.
- b) The transition state is expected to have one imaginary frequency. The entropy value for this structure was increased by an amount equal to the contribution of two imaginary frequencies would make if they were real.
