# Supplementary material for: Evaluation of packing single and multiple atoms and molecules in the porous organic cage CC3-R
Source: Royal Society of Chemistry journal article supplement (doi:10.1039/d1cp01934a), 2021-01-01
Supplement: d1cp01934a2.pdf [file d1cp01934a2.pdf]

Table S3. Cartesian Coordinates of all Species in Table S2 Optimized at the M06-2X/6-31G(d) level

CH4 Td cc3-ch4

Standard orientation:

| Center Number | Atomic Number | Atomic Type | Coordinates (Angstroms) |           |           |
|---------------|---------------|-------------|-------------------------|-----------|-----------|
|               |               |             | X                       | Y         | Z         |
| 1             | 6             | 0           | 0.000000                | 0.000000  | 0.000000  |
| 2             | 1             | 0           | 0.629802                | 0.629802  | 0.629802  |
| 3             | 1             | 0           | -0.629802               | -0.629802 | 0.629802  |
| 4             | 1             | 0           | -0.629802               | 0.629802  | -0.629802 |
| 5             | 1             | 0           | 0.629802                | -0.629802 | -0.629802 |

HCCl3 C3v cc3-hccl3

Standard orientation:

| Center Number | Atomic Number | Atomic Type | Coordinates (Angstroms) |           |           |
|---------------|---------------|-------------|-------------------------|-----------|-----------|
|               |               |             | X                       | Y         | Z         |
| 1             | 6             | 0           | 0.000000                | 0.000000  | 0.455182  |
| 2             | 1             | 0           | 0.000000                | 0.000000  | 1.540927  |
| 3             | 17            | 0           | 0.000000                | 1.686735  | -0.083765 |
| 4             | 17            | 0           | -1.460756               | -0.843368 | -0.083765 |
| 5             | 17            | 0           | 1.460756                | -0.843368 | -0.083765 |

CO2 Dih cc3-co2

Standard orientation:

| Center Number | Atomic Number | Atomic Type | Coordinates (Angstroms) |          |           |
|---------------|---------------|-------------|-------------------------|----------|-----------|
|               |               |             | X                       | Y        | Z         |
| 1             | 8             | 0           | 0.000000                | 0.000000 | 1.162697  |
| 2             | 6             | 0           | 0.000000                | 0.000000 | 0.000000  |
| 3             | 8             | 0           | 0.000000                | 0.000000 | -1.162697 |

C2H2 Dih cc3-rcc

Standard orientation:

| Center Number | Atomic Number | Atomic Type | Coordinates (Angstroms) |          |           |
|---------------|---------------|-------------|-------------------------|----------|-----------|
|               |               |             | X                       | Y        | Z         |
| 1             | 6             | 0           | 0.000000                | 0.000000 | 0.601088  |
| 2             | 1             | 0           | 0.000000                | 0.000000 | 1.667979  |
| 3             | 6             | 0           | 0.000000                | 0.000000 | -0.601088 |
| 4             | 1             | 0           | 0.000000                | 0.000000 | -1.667979 |

H2O C2v cc3-h2o

Standard orientation:

| Center Number | Atomic Number | Atomic Type | Coordinates (Angstroms) |          |          |
|---------------|---------------|-------------|-------------------------|----------|----------|
|               |               |             | X                       | Y        | Z        |
| 1             | 8             | 0           | 0.000000                | 0.000000 | 0.118351 |

|   |   |   |           |           |           |
|---|---|---|-----------|-----------|-----------|
| 2 | 1 | 0 | -0.000000 | 0.762602  | -0.473403 |
| 3 | 1 | 0 | -0.000000 | -0.762602 | -0.473403 |

SF6 Oh cc3-sf6

Standard orientation:

| Center<br>Number | Atomic<br>Number | Atomic<br>Type | Coordinates (Angstroms) |           |           |
|------------------|------------------|----------------|-------------------------|-----------|-----------|
|                  |                  |                | X                       | Y         | Z         |
| 1                | 16               | 0              | 0.000000                | 0.000000  | 0.000000  |
| 2                | 9                | 0              | -0.000000               | -0.000000 | 1.579653  |
| 3                | 9                | 0              | -0.000000               | 1.579653  | -0.000000 |
| 4                | 9                | 0              | -0.000000               | -0.000000 | -1.579653 |
| 5                | 9                | 0              | -1.579653               | -0.000000 | -0.000000 |
| 6                | 9                | 0              | -0.000000               | -1.579653 | 0.000000  |
| 7                | 9                | 0              | 1.579653                | -0.000000 | 0.000000  |

15-Crown-5 D5 crown4

Standard orientation:

| Center<br>Number | Atomic<br>Number | Atomic<br>Type | Coordinates (Angstroms) |           |           |
|------------------|------------------|----------------|-------------------------|-----------|-----------|
|                  |                  |                | X                       | Y         | Z         |
| 1                | 6                | 0              | 1.067045                | 2.385528  | 0.542942  |
| 2                | 1                | 0              | 0.700296                | 1.617475  | 1.236394  |
| 3                | 1                | 0              | 1.670334                | 3.085911  | 1.125807  |
| 4                | 6                | 0              | -1.939037               | 1.751988  | 0.542942  |
| 5                | 1                | 0              | -1.321907               | 1.165848  | 1.236394  |
| 6                | 1                | 0              | -2.418714               | 2.542180  | 1.125807  |
| 7                | 6                | 0              | -2.265435               | -1.302739 | 0.542942  |
| 8                | 1                | 0              | -1.517279               | -0.896941 | 1.236394  |
| 9                | 1                | 0              | -3.165181               | -1.514757 | 1.125807  |
| 10               | 6                | 0              | 0.538921                | -2.557126 | 0.542942  |
| 11               | 1                | 0              | 0.384177                | -1.720189 | 1.236394  |
| 12               | 1                | 0              | 0.462525                | -3.478352 | 1.125807  |
| 13               | 6                | 0              | 2.598507                | -0.277651 | 0.542942  |
| 14               | 1                | 0              | 1.754714                | -0.166194 | 1.236394  |
| 15               | 1                | 0              | 3.451037                | -0.634983 | 1.125807  |
| 16               | 8                | 0              | -0.000000               | 3.138123  | -0.000000 |
| 17               | 8                | 0              | 2.984532                | 0.969733  | -0.000000 |
| 18               | 8                | 0              | 1.844542                | -2.538795 | -0.000000 |
| 19               | 8                | 0              | -1.844542               | -2.538795 | -0.000000 |
| 20               | 8                | 0              | -2.984532               | 0.969733  | -0.000000 |
| 21               | 6                | 0              | -0.538921               | -2.557126 | -0.542942 |
| 22               | 1                | 0              | -0.384177               | -1.720189 | -1.236394 |
| 23               | 1                | 0              | -0.462525               | -3.478352 | -1.125807 |
| 24               | 6                | 0              | 1.939037                | 1.751988  | -0.542942 |
| 25               | 1                | 0              | 1.321907                | 1.165848  | -1.236394 |
| 26               | 1                | 0              | 2.418714                | 2.542180  | -1.125807 |
| 27               | 6                | 0              | -1.067045               | 2.385528  | -0.542942 |
| 28               | 1                | 0              | -0.700296               | 1.617475  | -1.236394 |
| 29               | 1                | 0              | -1.670334               | 3.085911  | -1.125807 |
| 30               | 6                | 0              | -2.598507               | -0.277651 | -0.542942 |
| 31               | 1                | 0              | -1.754714               | -0.166194 | -1.236394 |
| 32               | 1                | 0              | -3.451037               | -0.634983 | -1.125807 |
| 33               | 6                | 0              | 2.265435                | -1.302739 | -0.542942 |
| 34               | 1                | 0              | 1.517279                | -0.896941 | -1.236394 |

35 1 0 3.165181 -1.514757 -1.125807

15-Crown-5 C1 crown22

Standard orientation:

| Center<br>Number | Atomic<br>Number | Atomic<br>Type | Coordinates (Angstroms) |           |           |
|------------------|------------------|----------------|-------------------------|-----------|-----------|
|                  |                  |                | X                       | Y         | Z         |
| 1                | 8                | 0              | -2.313406               | 1.383053  | 0.548775  |
| 2                | 8                | 0              | 1.074876                | 2.748788  | 0.194577  |
| 3                | 8                | 0              | -2.077367               | -1.392094 | -0.567671 |
| 4                | 8                | 0              | 3.319041                | -0.138855 | 0.008779  |
| 5                | 8                | 0              | 0.600712                | -1.591784 | 0.101842  |
| 6                | 6                | 0              | -0.897759               | 1.374086  | 0.595444  |
| 7                | 6                | 0              | -2.874603               | 0.902530  | -0.655719 |
| 8                | 6                | 0              | -0.319214               | 2.655716  | 0.001501  |
| 9                | 6                | 0              | -3.230044               | -0.573235 | -0.578058 |
| 10               | 6                | 0              | 1.842566                | 1.762319  | -0.469138 |
| 11               | 6                | 0              | -1.679811               | -1.840328 | 0.707037  |
| 12               | 6                | 0              | 2.404000                | 0.786582  | 0.564924  |
| 13               | 6                | 0              | -0.344454               | -2.532824 | 0.550956  |
| 14               | 6                | 0              | 2.766511                | -1.135621 | -0.819716 |
| 15               | 6                | 0              | 1.882197                | -2.144554 | -0.104427 |
| 16               | 1                | 0              | -1.589204               | -1.005508 | 1.414861  |
| 17               | 1                | 0              | -0.037749               | -2.967313 | 1.515589  |
| 18               | 1                | 0              | -3.848407               | -0.754688 | 0.312104  |
| 19               | 1                | 0              | -2.191188               | 1.058502  | -1.502148 |
| 20               | 1                | 0              | 2.343210                | -2.432027 | 0.853656  |
| 21               | 1                | 0              | 2.191306                | -0.707731 | -1.653268 |
| 22               | 1                | 0              | 1.586625                | 0.275684  | 1.086550  |
| 23               | 1                | 0              | -0.613980               | 1.320490  | 1.652658  |
| 24               | 1                | 0              | 1.238074                | 1.242536  | -1.225607 |
| 25               | 1                | 0              | -0.761429               | 3.518343  | 0.506743  |
| 26               | 1                | 0              | -2.412512               | -2.554490 | 1.115115  |
| 27               | 1                | 0              | -0.438981               | -3.350285 | -0.180463 |
| 28               | 1                | 0              | 1.798802                | -3.048729 | -0.729213 |
| 29               | 1                | 0              | -3.815593               | -0.848625 | -1.463664 |
| 30               | 1                | 0              | 3.626293                | -1.664730 | -1.241494 |
| 31               | 1                | 0              | -3.786060               | 1.482681  | -0.842025 |
| 32               | 1                | 0              | 2.971584                | 1.363328  | 1.300172  |
| 33               | 1                | 0              | -0.493882               | 0.489794  | 0.087127  |
| 34               | 1                | 0              | -0.568352               | 2.725345  | -1.069839 |
| 35               | 1                | 0              | 2.674256                | 2.256534  | -0.984107 |

Mesitylene C3v cc3-mes2

Standard orientation:

| Center<br>Number | Atomic<br>Number | Atomic<br>Type | Coordinates (Angstroms) |           |           |
|------------------|------------------|----------------|-------------------------|-----------|-----------|
|                  |                  |                | X                       | Y         | Z         |
| 1                | 6                | 0              | 1.199694                | 0.692644  | -0.011796 |
| 2                | 6                | 0              | 0.000000                | 1.404735  | -0.009247 |
| 3                | 6                | 0              | -1.199694               | 0.692644  | -0.011796 |
| 4                | 6                | 0              | -1.216536               | -0.702367 | -0.009247 |
| 5                | 6                | 0              | -0.000000               | -1.385288 | -0.011796 |
| 6                | 6                | 0              | 1.216536                | -0.702367 | -0.009247 |
| 7                | 1                | 0              | 2.142466                | 1.236954  | -0.024022 |

|    |   |   |           |           |           |
|----|---|---|-----------|-----------|-----------|
| 8  | 1 | 0 | -2.142466 | 1.236954  | -0.024022 |
| 9  | 1 | 0 | -0.000000 | -2.473907 | -0.024022 |
| 10 | 6 | 0 | -2.522562 | -1.456402 | 0.012907  |
| 11 | 1 | 0 | -2.848152 | -1.644382 | 1.042255  |
| 12 | 1 | 0 | -3.315643 | -0.890952 | -0.484710 |
| 13 | 1 | 0 | -2.429409 | -2.425955 | -0.484710 |
| 14 | 6 | 0 | 0.000000  | 2.912803  | 0.012907  |
| 15 | 1 | 0 | -0.886234 | 3.316907  | -0.484710 |
| 16 | 1 | 0 | 0.000000  | 3.288763  | 1.042255  |
| 17 | 1 | 0 | 0.886234  | 3.316907  | -0.484710 |
| 18 | 6 | 0 | 2.522562  | -1.456402 | 0.012907  |
| 19 | 1 | 0 | 3.315643  | -0.890952 | -0.484710 |
| 20 | 1 | 0 | 2.848152  | -1.644382 | 1.042255  |
| 21 | 1 | 0 | 2.429409  | -2.425955 | -0.484710 |

5-tBu-m-xylene Cs cc3-dpe10

Standard orientation:

| Center<br>Number | Atomic<br>Number | Atomic<br>Type | Coordinates (Angstroms) |           |           |
|------------------|------------------|----------------|-------------------------|-----------|-----------|
|                  |                  |                | X                       | Y         | Z         |
| 1                | 6                | 0              | 0.268169                | -2.323292 | 0.000000  |
| 2                | 6                | 0              | 1.399534                | -1.518500 | 0.000000  |
| 3                | 6                | 0              | 1.240096                | -0.125900 | 0.000000  |
| 4                | 6                | 0              | -0.020030               | 0.465072  | 0.000000  |
| 5                | 6                | 0              | -1.139999               | -0.381329 | 0.000000  |
| 6                | 6                | 0              | -1.015548               | -1.764952 | 0.000000  |
| 7                | 1                | 0              | 0.379491                | -3.406323 | 0.000000  |
| 8                | 1                | 0              | 2.134337                | 0.490515  | 0.000000  |
| 9                | 1                | 0              | -2.139180               | 0.049315  | 0.000000  |
| 10               | 6                | 0              | -0.225186               | 1.982820  | 0.000000  |
| 11               | 6                | 0              | -1.015548               | 2.390359  | 1.254823  |
| 12               | 6                | 0              | 1.102231                | 2.747513  | 0.000000  |
| 13               | 6                | 0              | -1.015548               | 2.390359  | -1.254823 |
| 14               | 1                | 0              | -1.997754               | 1.909303  | 1.286749  |
| 15               | 1                | 0              | -0.472250               | 2.108529  | 2.162632  |
| 16               | 1                | 0              | -1.170861               | 3.475170  | 1.268378  |
| 17               | 1                | 0              | 1.699780                | 2.516691  | -0.888166 |
| 18               | 1                | 0              | 0.904580                | 3.824386  | 0.000000  |
| 19               | 1                | 0              | 1.699780                | 2.516691  | 0.888166  |
| 20               | 1                | 0              | -1.170861               | 3.475170  | -1.268378 |
| 21               | 1                | 0              | -0.472250               | 2.108529  | -2.162632 |
| 22               | 1                | 0              | -1.997754               | 1.909303  | -1.286749 |
| 23               | 6                | 0              | 2.784305                | -2.116512 | 0.000000  |
| 24               | 6                | 0              | -2.230228               | -2.658912 | 0.000000  |
| 25               | 1                | 0              | 3.350759                | -1.799149 | 0.881787  |
| 26               | 1                | 0              | 2.744978                | -3.208778 | 0.000000  |
| 27               | 1                | 0              | 3.350759                | -1.799149 | -0.881787 |
| 28               | 1                | 0              | -3.153685               | -2.074246 | 0.000000  |
| 29               | 1                | 0              | -2.241678               | -3.308160 | -0.881737 |
| 30               | 1                | 0              | -2.241678               | -3.308160 | 0.881737  |

CC3-R T cc3-r

Standard orientation:

| Center<br>Number | Atomic<br>Number | Atomic<br>Type | Coordinates (Angstroms) |   |   |
|------------------|------------------|----------------|-------------------------|---|---|
|                  |                  |                | X                       | Y | Z |

|    |   |   |           |           |           |
|----|---|---|-----------|-----------|-----------|
| 1  | 7 | 0 | -1.124432 | -0.902806 | 5.552609  |
| 2  | 7 | 0 | 1.124432  | 0.902806  | 5.552609  |
| 3  | 7 | 0 | 0.902806  | 5.552609  | 1.124432  |
| 4  | 7 | 0 | -0.902806 | 5.552609  | -1.124432 |
| 5  | 6 | 0 | -2.750819 | -1.328371 | 3.218686  |
| 6  | 1 | 0 | -2.983002 | -0.476489 | 3.852668  |
| 7  | 6 | 0 | -1.639580 | -2.119879 | 3.541811  |
| 8  | 6 | 0 | -0.818491 | -1.818789 | 4.731235  |
| 9  | 1 | 0 | 0.069627  | -2.454586 | 4.871341  |
| 10 | 6 | 0 | -0.271235 | -0.718923 | 6.710127  |
| 11 | 1 | 0 | 0.598645  | -1.400085 | 6.684638  |
| 12 | 6 | 0 | 0.271235  | 0.718923  | 6.710127  |
| 13 | 1 | 0 | -0.598645 | 1.400085  | 6.684638  |
| 14 | 6 | 0 | 1.088303  | 0.985190  | 7.979368  |
| 15 | 1 | 0 | 1.449229  | 2.019204  | 7.956556  |
| 16 | 1 | 0 | 1.974687  | 0.337812  | 7.958187  |
| 17 | 6 | 0 | 0.270266  | 0.715422  | 9.242580  |
| 18 | 1 | 0 | 0.884081  | 0.895420  | 10.131460 |
| 19 | 1 | 0 | -0.571825 | 1.419340  | 9.289561  |
| 20 | 6 | 0 | -0.270266 | -0.715422 | 9.242580  |
| 21 | 1 | 0 | -0.884081 | -0.895420 | 10.131460 |
| 22 | 1 | 0 | 0.571825  | -1.419340 | 9.289561  |
| 23 | 6 | 0 | -1.088303 | -0.985190 | 7.979368  |
| 24 | 1 | 0 | -1.974687 | -0.337812 | 7.958187  |
| 25 | 1 | 0 | -1.449229 | -2.019204 | 7.956556  |
| 26 | 6 | 0 | 0.818491  | 1.818789  | 4.731235  |
| 27 | 1 | 0 | -0.069627 | 2.454586  | 4.871341  |
| 28 | 6 | 0 | 1.639580  | 2.119879  | 3.541811  |
| 29 | 6 | 0 | 2.750819  | 1.328371  | 3.218686  |
| 30 | 1 | 0 | 2.983002  | 0.476489  | 3.852668  |
| 31 | 6 | 0 | 3.541811  | 1.639580  | 2.119879  |
| 32 | 6 | 0 | 3.218686  | 2.750819  | 1.328371  |
| 33 | 1 | 0 | 3.852668  | 2.983002  | 0.476489  |
| 34 | 6 | 0 | 2.119879  | 3.541811  | 1.639580  |
| 35 | 6 | 0 | 1.328371  | 3.218686  | 2.750819  |
| 36 | 1 | 0 | 0.476489  | 3.852668  | 2.983002  |
| 37 | 6 | 0 | 1.818789  | 4.731235  | 0.818491  |
| 38 | 1 | 0 | 2.454586  | 4.871341  | -0.069627 |
| 39 | 6 | 0 | 0.718923  | 6.710127  | 0.271235  |
| 40 | 1 | 0 | 1.400085  | 6.684638  | -0.598645 |
| 41 | 6 | 0 | -0.718923 | 6.710127  | -0.271235 |
| 42 | 1 | 0 | -1.400085 | 6.684638  | 0.598645  |
| 43 | 6 | 0 | -0.985190 | 7.979368  | -1.088303 |
| 44 | 1 | 0 | -2.019204 | 7.956556  | -1.449229 |
| 45 | 1 | 0 | -0.337812 | 7.958187  | -1.974687 |
| 46 | 6 | 0 | -0.715422 | 9.242580  | -0.270266 |
| 47 | 1 | 0 | -1.419340 | 9.289561  | 0.571825  |
| 48 | 1 | 0 | -0.895420 | 10.131460 | -0.884081 |
| 49 | 6 | 0 | 0.715422  | 9.242580  | 0.270266  |
| 50 | 1 | 0 | 1.419340  | 9.289561  | -0.571825 |
| 51 | 1 | 0 | 0.895420  | 10.131460 | 0.884081  |
| 52 | 6 | 0 | 0.985190  | 7.979368  | 1.088303  |
| 53 | 1 | 0 | 0.337812  | 7.958187  | 1.974687  |
| 54 | 1 | 0 | 2.019204  | 7.956556  | 1.449229  |
| 55 | 6 | 0 | -1.818789 | 4.731235  | -0.818491 |
| 56 | 1 | 0 | -2.454586 | 4.871341  | 0.069627  |
| 57 | 7 | 0 | -0.902806 | -5.552609 | 1.124432  |
| 58 | 7 | 0 | 0.902806  | -5.552609 | -1.124432 |

|     |   |   |           |            |           |
|-----|---|---|-----------|------------|-----------|
| 59  | 7 | 0 | 5.552609  | -1.124432  | -0.902806 |
| 60  | 7 | 0 | 5.552609  | 1.124432   | 0.902806  |
| 61  | 6 | 0 | -1.328371 | -3.218686  | 2.750819  |
| 62  | 1 | 0 | -0.476489 | -3.852668  | 2.983002  |
| 63  | 6 | 0 | -2.119879 | -3.541811  | 1.639580  |
| 64  | 6 | 0 | -1.818789 | -4.731235  | 0.818491  |
| 65  | 1 | 0 | -2.454586 | -4.871341  | -0.069627 |
| 66  | 6 | 0 | -0.718923 | -6.710127  | 0.271235  |
| 67  | 1 | 0 | -1.400085 | -6.684638  | -0.598645 |
| 68  | 6 | 0 | 0.718923  | -6.710127  | -0.271235 |
| 69  | 1 | 0 | 1.400085  | -6.684638  | 0.598645  |
| 70  | 6 | 0 | 0.985190  | -7.979368  | -1.088303 |
| 71  | 1 | 0 | 2.019204  | -7.956556  | -1.449229 |
| 72  | 1 | 0 | 0.337812  | -7.958187  | -1.974687 |
| 73  | 6 | 0 | 0.715422  | -9.242580  | -0.270266 |
| 74  | 1 | 0 | 0.895420  | -10.131460 | -0.884081 |
| 75  | 1 | 0 | 1.419340  | -9.289561  | 0.571825  |
| 76  | 6 | 0 | -0.715422 | -9.242580  | 0.270266  |
| 77  | 1 | 0 | -0.895420 | -10.131460 | 0.884081  |
| 78  | 1 | 0 | -1.419340 | -9.289561  | -0.571825 |
| 79  | 6 | 0 | -0.985190 | -7.979368  | 1.088303  |
| 80  | 1 | 0 | -0.337812 | -7.958187  | 1.974687  |
| 81  | 1 | 0 | -2.019204 | -7.956556  | 1.449229  |
| 82  | 6 | 0 | 1.818789  | -4.731235  | -0.818491 |
| 83  | 1 | 0 | 2.454586  | -4.871341  | 0.069627  |
| 84  | 6 | 0 | 2.119879  | -3.541811  | -1.639580 |
| 85  | 6 | 0 | 1.328371  | -3.218686  | -2.750819 |
| 86  | 1 | 0 | 0.476489  | -3.852668  | -2.983002 |
| 87  | 6 | 0 | 1.639580  | -2.119879  | -3.541811 |
| 88  | 6 | 0 | 2.750819  | -1.328371  | -3.218686 |
| 89  | 1 | 0 | 2.983002  | -0.476489  | -3.852668 |
| 90  | 6 | 0 | 3.541811  | -1.639580  | -2.119879 |
| 91  | 6 | 0 | 3.218686  | -2.750819  | -1.328371 |
| 92  | 1 | 0 | 3.852668  | -2.983002  | -0.476489 |
| 93  | 6 | 0 | 4.731235  | -0.818491  | -1.818789 |
| 94  | 1 | 0 | 4.871341  | 0.069627   | -2.454586 |
| 95  | 6 | 0 | 6.710127  | -0.271235  | -0.718923 |
| 96  | 1 | 0 | 6.684638  | 0.598645   | -1.400085 |
| 97  | 6 | 0 | 6.710127  | 0.271235   | 0.718923  |
| 98  | 1 | 0 | 6.684638  | -0.598645  | 1.400085  |
| 99  | 6 | 0 | 7.979368  | 1.088303   | 0.985190  |
| 100 | 1 | 0 | 7.956556  | 1.449229   | 2.019204  |
| 101 | 1 | 0 | 7.958187  | 1.974687   | 0.337812  |
| 102 | 6 | 0 | 9.242580  | 0.270266   | 0.715422  |
| 103 | 1 | 0 | 9.289561  | -0.571825  | 1.419340  |
| 104 | 1 | 0 | 10.131460 | 0.884081   | 0.895420  |
| 105 | 6 | 0 | 9.242580  | -0.270266  | -0.715422 |
| 106 | 1 | 0 | 9.289561  | 0.571825   | -1.419340 |
| 107 | 1 | 0 | 10.131460 | -0.884081  | -0.895420 |
| 108 | 6 | 0 | 7.979368  | -1.088303  | -0.985190 |
| 109 | 1 | 0 | 7.958187  | -1.974687  | -0.337812 |
| 110 | 1 | 0 | 7.956556  | -1.449229  | -2.019204 |
| 111 | 6 | 0 | 4.731235  | 0.818491   | 1.818789  |
| 112 | 1 | 0 | 4.871341  | -0.069627  | 2.454586  |
| 113 | 7 | 0 | -5.552609 | -1.124432  | 0.902806  |
| 114 | 7 | 0 | -5.552609 | 1.124432   | -0.902806 |
| 115 | 7 | 0 | -1.124432 | 0.902806   | -5.552609 |
| 116 | 7 | 0 | 1.124432  | -0.902806  | -5.552609 |
| 117 | 6 | 0 | -3.218686 | -2.750819  | 1.328371  |

|     |   |   |            |           |            |
|-----|---|---|------------|-----------|------------|
| 118 | 1 | 0 | -3.852668  | -2.983002 | 0.476489   |
| 119 | 6 | 0 | -3.541811  | -1.639580 | 2.119879   |
| 120 | 6 | 0 | -4.731235  | -0.818491 | 1.818789   |
| 121 | 1 | 0 | -4.871341  | 0.069627  | 2.454586   |
| 122 | 6 | 0 | -6.710127  | -0.271235 | 0.718923   |
| 123 | 1 | 0 | -6.684638  | 0.598645  | 1.400085   |
| 124 | 6 | 0 | -6.710127  | 0.271235  | -0.718923  |
| 125 | 1 | 0 | -6.684638  | -0.598645 | -1.400085  |
| 126 | 6 | 0 | -7.979368  | 1.088303  | -0.985190  |
| 127 | 1 | 0 | -7.956556  | 1.449229  | -2.019204  |
| 128 | 1 | 0 | -7.958187  | 1.974687  | -0.337812  |
| 129 | 6 | 0 | -9.242580  | 0.270266  | -0.715422  |
| 130 | 1 | 0 | -10.131460 | 0.884081  | -0.895420  |
| 131 | 1 | 0 | -9.289561  | -0.571825 | -1.419340  |
| 132 | 6 | 0 | -9.242580  | -0.270266 | 0.715422   |
| 133 | 1 | 0 | -10.131460 | -0.884081 | 0.895420   |
| 134 | 1 | 0 | -9.289561  | 0.571825  | 1.419340   |
| 135 | 6 | 0 | -7.979368  | -1.088303 | 0.985190   |
| 136 | 1 | 0 | -7.958187  | -1.974687 | 0.337812   |
| 137 | 1 | 0 | -7.956556  | -1.449229 | 2.019204   |
| 138 | 6 | 0 | -4.731235  | 0.818491  | -1.818789  |
| 139 | 1 | 0 | -4.871341  | -0.069627 | -2.454586  |
| 140 | 6 | 0 | -3.541811  | 1.639580  | -2.119879  |
| 141 | 6 | 0 | -3.218686  | 2.750819  | -1.328371  |
| 142 | 1 | 0 | -3.852668  | 2.983002  | -0.476489  |
| 143 | 6 | 0 | -2.119879  | 3.541811  | -1.639580  |
| 144 | 6 | 0 | -1.328371  | 3.218686  | -2.750819  |
| 145 | 1 | 0 | -0.476489  | 3.852668  | -2.983002  |
| 146 | 6 | 0 | -1.639580  | 2.119879  | -3.541811  |
| 147 | 6 | 0 | -2.750819  | 1.328371  | -3.218686  |
| 148 | 1 | 0 | -2.983002  | 0.476489  | -3.852668  |
| 149 | 6 | 0 | -0.818491  | 1.818789  | -4.731235  |
| 150 | 1 | 0 | 0.069627   | 2.454586  | -4.871341  |
| 151 | 6 | 0 | -0.271235  | 0.718923  | -6.710127  |
| 152 | 1 | 0 | 0.598645   | 1.400085  | -6.684638  |
| 153 | 6 | 0 | 0.271235   | -0.718923 | -6.710127  |
| 154 | 1 | 0 | -0.598645  | -1.400085 | -6.684638  |
| 155 | 6 | 0 | 1.088303   | -0.985190 | -7.979368  |
| 156 | 1 | 0 | 1.449229   | -2.019204 | -7.956556  |
| 157 | 1 | 0 | 1.974687   | -0.337812 | -7.958187  |
| 158 | 6 | 0 | 0.270266   | -0.715422 | -9.242580  |
| 159 | 1 | 0 | -0.571825  | -1.419340 | -9.289561  |
| 160 | 1 | 0 | 0.884081   | -0.895420 | -10.131460 |
| 161 | 6 | 0 | -0.270266  | 0.715422  | -9.242580  |
| 162 | 1 | 0 | 0.571825   | 1.419340  | -9.289561  |
| 163 | 1 | 0 | -0.884081  | 0.895420  | -10.131460 |
| 164 | 6 | 0 | -1.088303  | 0.985190  | -7.979368  |
| 165 | 1 | 0 | -1.974687  | 0.337812  | -7.958187  |
| 166 | 1 | 0 | -1.449229  | 2.019204  | -7.956556  |
| 167 | 6 | 0 | 0.818491   | -1.818789 | -4.731235  |
| 168 | 1 | 0 | -0.069627  | -2.454586 | -4.871341  |

Xe@CC3 T cc3-xex

Standard orientation:

| Center<br>Number | Atomic<br>Number | Atomic<br>Type | Coordinates (Angstroms) |   |   |
|------------------|------------------|----------------|-------------------------|---|---|
|                  |                  |                | X                       | Y | Z |

|    |   |   |           |           |           |
|----|---|---|-----------|-----------|-----------|
| 1  | 7 | 0 | -1.112383 | -0.903515 | 5.533892  |
| 2  | 7 | 0 | 1.112383  | 0.903515  | 5.533892  |
| 3  | 7 | 0 | 0.903515  | 5.533892  | 1.112383  |
| 4  | 7 | 0 | -0.903515 | 5.533892  | -1.112383 |
| 5  | 6 | 0 | -2.680457 | -1.260717 | 3.152781  |
| 6  | 1 | 0 | -2.915018 | -0.413734 | 3.792422  |
| 7  | 6 | 0 | -1.571133 | -2.055670 | 3.474603  |
| 8  | 6 | 0 | -0.764808 | -1.771833 | 4.678125  |
| 9  | 1 | 0 | 0.145371  | -2.379542 | 4.799410  |
| 10 | 6 | 0 | -0.266795 | -0.721060 | 6.696307  |
| 11 | 1 | 0 | 0.608090  | -1.395719 | 6.671542  |
| 12 | 6 | 0 | 0.266795  | 0.721060  | 6.696307  |
| 13 | 1 | 0 | -0.608090 | 1.395719  | 6.671542  |
| 14 | 6 | 0 | 1.083692  | 0.991683  | 7.963876  |
| 15 | 1 | 0 | 1.439282  | 2.027524  | 7.941854  |
| 16 | 1 | 0 | 1.973141  | 0.348681  | 7.941899  |
| 17 | 6 | 0 | 0.266807  | 0.716859  | 9.226954  |
| 18 | 1 | 0 | 0.879350  | 0.899552  | 10.116126 |
| 19 | 1 | 0 | -0.578884 | 1.416469  | 9.274085  |
| 20 | 6 | 0 | -0.266807 | -0.716859 | 9.226954  |
| 21 | 1 | 0 | -0.879350 | -0.899552 | 10.116126 |
| 22 | 1 | 0 | 0.578884  | -1.416469 | 9.274085  |
| 23 | 6 | 0 | -1.083692 | -0.991683 | 7.963876  |
| 24 | 1 | 0 | -1.973141 | -0.348681 | 7.941899  |
| 25 | 1 | 0 | -1.439282 | -2.027524 | 7.941854  |
| 26 | 6 | 0 | 0.764808  | 1.771833  | 4.678125  |
| 27 | 1 | 0 | -0.145371 | 2.379542  | 4.799410  |
| 28 | 6 | 0 | 1.571133  | 2.055670  | 3.474603  |
| 29 | 6 | 0 | 2.680457  | 1.260717  | 3.152781  |
| 30 | 1 | 0 | 2.915018  | 0.413734  | 3.792422  |
| 31 | 6 | 0 | 3.474603  | 1.571133  | 2.055670  |
| 32 | 6 | 0 | 3.152781  | 2.680457  | 1.260717  |
| 33 | 1 | 0 | 3.792422  | 2.915018  | 0.413734  |
| 34 | 6 | 0 | 2.055670  | 3.474603  | 1.571133  |
| 35 | 6 | 0 | 1.260717  | 3.152781  | 2.680457  |
| 36 | 1 | 0 | 0.413734  | 3.792422  | 2.915018  |
| 37 | 6 | 0 | 1.771833  | 4.678125  | 0.764808  |
| 38 | 1 | 0 | 2.379542  | 4.799410  | -0.145371 |
| 39 | 6 | 0 | 0.721060  | 6.696307  | 0.266795  |
| 40 | 1 | 0 | 1.395719  | 6.671542  | -0.608090 |
| 41 | 6 | 0 | -0.721060 | 6.696307  | -0.266795 |
| 42 | 1 | 0 | -1.395719 | 6.671542  | 0.608090  |
| 43 | 6 | 0 | -0.991683 | 7.963876  | -1.083692 |
| 44 | 1 | 0 | -2.027524 | 7.941854  | -1.439282 |
| 45 | 1 | 0 | -0.348681 | 7.941899  | -1.973141 |
| 46 | 6 | 0 | -0.716859 | 9.226954  | -0.266807 |
| 47 | 1 | 0 | -1.416469 | 9.274085  | 0.578884  |
| 48 | 1 | 0 | -0.899552 | 10.116126 | -0.879350 |
| 49 | 6 | 0 | 0.716859  | 9.226954  | 0.266807  |
| 50 | 1 | 0 | 1.416469  | 9.274085  | -0.578884 |
| 51 | 1 | 0 | 0.899552  | 10.116126 | 0.879350  |
| 52 | 6 | 0 | 0.991683  | 7.963876  | 1.083692  |
| 53 | 1 | 0 | 0.348681  | 7.941899  | 1.973141  |
| 54 | 1 | 0 | 2.027524  | 7.941854  | 1.439282  |
| 55 | 6 | 0 | -1.771833 | 4.678125  | -0.764808 |
| 56 | 1 | 0 | -2.379542 | 4.799410  | 0.145371  |
| 57 | 7 | 0 | -0.903515 | -5.533892 | 1.112383  |
| 58 | 7 | 0 | 0.903515  | -5.533892 | -1.112383 |
| 59 | 7 | 0 | 5.533892  | -1.112383 | -0.903515 |



|     |   |   |           |            |           |
|-----|---|---|-----------|------------|-----------|
| 60  | 7 | 0 | 5.533892  | 1.112383   | 0.903515  |
| 61  | 6 | 0 | -1.260717 | -3.152781  | 2.680457  |
| 62  | 1 | 0 | -0.413734 | -3.792422  | 2.915018  |
| 63  | 6 | 0 | -2.055670 | -3.474603  | 1.571133  |
| 64  | 6 | 0 | -1.771833 | -4.678125  | 0.764808  |
| 65  | 1 | 0 | -2.379542 | -4.799410  | -0.145371 |
| 66  | 6 | 0 | -0.721060 | -6.696307  | 0.266795  |
| 67  | 1 | 0 | -1.395719 | -6.671542  | -0.608090 |
| 68  | 6 | 0 | 0.721060  | -6.696307  | -0.266795 |
| 69  | 1 | 0 | 1.395719  | -6.671542  | 0.608090  |
| 70  | 6 | 0 | 0.991683  | -7.963876  | -1.083692 |
| 71  | 1 | 0 | 2.027524  | -7.941854  | -1.439282 |
| 72  | 1 | 0 | 0.348681  | -7.941899  | -1.973141 |
| 73  | 6 | 0 | 0.716859  | -9.226954  | -0.266807 |
| 74  | 1 | 0 | 0.899552  | -10.116126 | -0.879350 |
| 75  | 1 | 0 | 1.416469  | -9.274085  | 0.578884  |
| 76  | 6 | 0 | -0.716859 | -9.226954  | 0.266807  |
| 77  | 1 | 0 | -0.899552 | -10.116126 | 0.879350  |
| 78  | 1 | 0 | -1.416469 | -9.274085  | -0.578884 |
| 79  | 6 | 0 | -0.991683 | -7.963876  | 1.083692  |
| 80  | 1 | 0 | -0.348681 | -7.941899  | 1.973141  |
| 81  | 1 | 0 | -2.027524 | -7.941854  | 1.439282  |
| 82  | 6 | 0 | 1.771833  | -4.678125  | -0.764808 |
| 83  | 1 | 0 | 2.379542  | -4.799410  | 0.145371  |
| 84  | 6 | 0 | 2.055670  | -3.474603  | -1.571133 |
| 85  | 6 | 0 | 1.260717  | -3.152781  | -2.680457 |
| 86  | 1 | 0 | 0.413734  | -3.792422  | -2.915018 |
| 87  | 6 | 0 | 1.571133  | -2.055670  | -3.474603 |
| 88  | 6 | 0 | 2.680457  | -1.260717  | -3.152781 |
| 89  | 1 | 0 | 2.915018  | -0.413734  | -3.792422 |
| 90  | 6 | 0 | 3.474603  | -1.571133  | -2.055670 |
| 91  | 6 | 0 | 3.152781  | -2.680457  | -1.260717 |
| 92  | 1 | 0 | 3.792422  | -2.915018  | -0.413734 |
| 93  | 6 | 0 | 4.678125  | -0.764808  | -1.771833 |
| 94  | 1 | 0 | 4.799410  | 0.145371   | -2.379542 |
| 95  | 6 | 0 | 6.696307  | -0.266795  | -0.721060 |
| 96  | 1 | 0 | 6.671542  | 0.608090   | -1.395719 |
| 97  | 6 | 0 | 6.696307  | 0.266795   | 0.721060  |
| 98  | 1 | 0 | 6.671542  | -0.608090  | 1.395719  |
| 99  | 6 | 0 | 7.963876  | 1.083692   | 0.991683  |
| 100 | 1 | 0 | 7.941854  | 1.439282   | 2.027524  |
| 101 | 1 | 0 | 7.941899  | 1.973141   | 0.348681  |
| 102 | 6 | 0 | 9.226954  | 0.266807   | 0.716859  |
| 103 | 1 | 0 | 9.274085  | -0.578884  | 1.416469  |
| 104 | 1 | 0 | 10.116126 | 0.879350   | 0.899552  |
| 105 | 6 | 0 | 9.226954  | -0.266807  | -0.716859 |
| 106 | 1 | 0 | 9.274085  | 0.578884   | -1.416469 |
| 107 | 1 | 0 | 10.116126 | -0.879350  | -0.899552 |
| 108 | 6 | 0 | 7.963876  | -1.083692  | -0.991683 |
| 109 | 1 | 0 | 7.941899  | -1.973141  | -0.348681 |
| 110 | 1 | 0 | 7.941854  | -1.439282  | -2.027524 |
| 111 | 6 | 0 | 4.678125  | 0.764808   | 1.771833  |
| 112 | 1 | 0 | 4.799410  | -0.145371  | 2.379542  |
| 113 | 7 | 0 | -5.533892 | -1.112383  | 0.903515  |
| 114 | 7 | 0 | -5.533892 | 1.112383   | -0.903515 |
| 115 | 7 | 0 | -1.112383 | 0.903515   | -5.533892 |
| 116 | 7 | 0 | 1.112383  | -0.903515  | -5.533892 |
| 117 | 6 | 0 | -3.152781 | -2.680457  | 1.260717  |
| 118 | 1 | 0 | -3.792422 | -2.915018  | 0.413734  |

|     |    |   |            |           |            |
|-----|----|---|------------|-----------|------------|
| 119 | 6  | 0 | -3.474603  | -1.571133 | 2.055670   |
| 120 | 6  | 0 | -4.678125  | -0.764808 | 1.771833   |
| 121 | 1  | 0 | -4.799410  | 0.145371  | 2.379542   |
| 122 | 6  | 0 | -6.696307  | -0.266795 | 0.721060   |
| 123 | 1  | 0 | -6.671542  | 0.608090  | 1.395719   |
| 124 | 6  | 0 | -6.696307  | 0.266795  | -0.721060  |
| 125 | 1  | 0 | -6.671542  | -0.608090 | -1.395719  |
| 126 | 6  | 0 | -7.963876  | 1.083692  | -0.991683  |
| 127 | 1  | 0 | -7.941854  | 1.439282  | -2.027524  |
| 128 | 1  | 0 | -7.941899  | 1.973141  | -0.348681  |
| 129 | 6  | 0 | -9.226954  | 0.266807  | -0.716859  |
| 130 | 1  | 0 | -10.116126 | 0.879350  | -0.899552  |
| 131 | 1  | 0 | -9.274085  | -0.578884 | -1.416469  |
| 132 | 6  | 0 | -9.226954  | -0.266807 | 0.716859   |
| 133 | 1  | 0 | -10.116126 | -0.879350 | 0.899552   |
| 134 | 1  | 0 | -9.274085  | 0.578884  | 1.416469   |
| 135 | 6  | 0 | -7.963876  | -1.083692 | 0.991683   |
| 136 | 1  | 0 | -7.941899  | -1.973141 | 0.348681   |
| 137 | 1  | 0 | -7.941854  | -1.439282 | 2.027524   |
| 138 | 6  | 0 | -4.678125  | 0.764808  | -1.771833  |
| 139 | 1  | 0 | -4.799410  | -0.145371 | -2.379542  |
| 140 | 6  | 0 | -3.474603  | 1.571133  | -2.055670  |
| 141 | 6  | 0 | -3.152781  | 2.680457  | -1.260717  |
| 142 | 1  | 0 | -3.792422  | 2.915018  | -0.413734  |
| 143 | 6  | 0 | -2.055670  | 3.474603  | -1.571133  |
| 144 | 6  | 0 | -1.260717  | 3.152781  | -2.680457  |
| 145 | 1  | 0 | -0.413734  | 3.792422  | -2.915018  |
| 146 | 6  | 0 | -1.571133  | 2.055670  | -3.474603  |
| 147 | 6  | 0 | -2.680457  | 1.260717  | -3.152781  |
| 148 | 1  | 0 | -2.915018  | 0.413734  | -3.792422  |
| 149 | 6  | 0 | -0.764808  | 1.771833  | -4.678125  |
| 150 | 1  | 0 | 0.145371   | 2.379542  | -4.799410  |
| 151 | 6  | 0 | -0.266795  | 0.721060  | -6.696307  |
| 152 | 1  | 0 | 0.608090   | 1.395719  | -6.671542  |
| 153 | 6  | 0 | 0.266795   | -0.721060 | -6.696307  |
| 154 | 1  | 0 | -0.608090  | -1.395719 | -6.671542  |
| 155 | 6  | 0 | 1.083692   | -0.991683 | -7.963876  |
| 156 | 1  | 0 | 1.439282   | -2.027524 | -7.941854  |
| 157 | 1  | 0 | 1.973141   | -0.348681 | -7.941899  |
| 158 | 6  | 0 | 0.266807   | -0.716859 | -9.226954  |
| 159 | 1  | 0 | -0.578884  | -1.416469 | -9.274085  |
| 160 | 1  | 0 | 0.879350   | -0.899552 | -10.116126 |
| 161 | 6  | 0 | -0.266807  | 0.716859  | -9.226954  |
| 162 | 1  | 0 | 0.578884   | 1.416469  | -9.274085  |
| 163 | 1  | 0 | -0.879350  | 0.899552  | -10.116126 |
| 164 | 6  | 0 | -1.083692  | 0.991683  | -7.963876  |
| 165 | 1  | 0 | -1.973141  | 0.348681  | -7.941899  |
| 166 | 1  | 0 | -1.439282  | 2.027524  | -7.941854  |
| 167 | 6  | 0 | 0.764808   | -1.771833 | -4.678125  |
| 168 | 1  | 0 | -0.145371  | -2.379542 | -4.799410  |
| 169 | 54 | 0 | 0.000000   | 0.000000  | 0.000000   |

3Xe@CC3 C3 cc3-rcj

Standard orientation:

| Center<br>Number | Atomic<br>Number | Atomic<br>Type | Coordinates (Angstroms) |   |   |
|------------------|------------------|----------------|-------------------------|---|---|
|                  |                  |                | X                       | Y | Z |

|    |   |   |           |           |           |
|----|---|---|-----------|-----------|-----------|
| 1  | 7 | 0 | -4.041853 | 2.684805  | 3.265148  |
| 2  | 7 | 0 | -1.697082 | 4.363664  | 3.528595  |
| 3  | 7 | 0 | 1.763906  | 5.084029  | -1.845795 |
| 4  | 7 | 0 | 1.477724  | 3.410987  | -4.197463 |
| 5  | 6 | 0 | -4.358570 | 0.648826  | 1.260101  |
| 6  | 1 | 0 | -4.628983 | 1.669190  | 0.999104  |
| 7  | 6 | 0 | -3.831806 | 0.400993  | 2.535330  |
| 8  | 6 | 0 | -3.672500 | 1.497069  | 3.511395  |
| 9  | 1 | 0 | -3.228964 | 1.214008  | 4.478847  |
| 10 | 6 | 0 | -3.893509 | 3.670954  | 4.317675  |
| 11 | 1 | 0 | -3.378149 | 3.247693  | 5.198790  |
| 12 | 6 | 0 | -3.039183 | 4.838709  | 3.802277  |
| 13 | 1 | 0 | -3.525197 | 5.227454  | 2.889177  |
| 14 | 6 | 0 | -2.963007 | 5.953924  | 4.851959  |
| 15 | 1 | 0 | -2.361017 | 6.775888  | 4.449404  |
| 16 | 1 | 0 | -2.425892 | 5.564456  | 5.726630  |
| 17 | 6 | 0 | -4.353165 | 6.439832  | 5.262356  |
| 18 | 1 | 0 | -4.266569 | 7.220834  | 6.025125  |
| 19 | 1 | 0 | -4.851793 | 6.894937  | 4.395757  |
| 20 | 6 | 0 | -5.202227 | 5.276532  | 5.777056  |
| 21 | 1 | 0 | -6.208653 | 5.620002  | 6.038561  |
| 22 | 1 | 0 | -4.751862 | 4.880402  | 6.697407  |
| 23 | 6 | 0 | -5.285136 | 4.163921  | 4.731818  |
| 24 | 1 | 0 | -5.800750 | 4.527620  | 3.833459  |
| 25 | 1 | 0 | -5.863219 | 3.312548  | 5.107399  |
| 26 | 6 | 0 | -1.233195 | 4.541898  | 2.362175  |
| 27 | 1 | 0 | -1.825208 | 5.021030  | 1.566015  |
| 28 | 6 | 0 | 0.138373  | 4.145401  | 1.986848  |
| 29 | 6 | 0 | 0.964553  | 3.463511  | 2.890891  |
| 30 | 1 | 0 | 0.569445  | 3.221572  | 3.874262  |
| 31 | 6 | 0 | 2.263173  | 3.117944  | 2.535330  |
| 32 | 6 | 0 | 2.741185  | 3.450220  | 1.260101  |
| 33 | 1 | 0 | 3.760053  | 3.174221  | 0.999104  |
| 34 | 6 | 0 | 1.925554  | 4.112670  | 0.350756  |
| 35 | 6 | 0 | 0.622338  | 4.466773  | 0.724293  |
| 36 | 1 | 0 | 0.000000  | 4.993005  | 0.004456  |
| 37 | 6 | 0 | 2.444858  | 4.440380  | -0.991393 |
| 38 | 1 | 0 | 3.470746  | 4.098348  | -1.201882 |
| 39 | 6 | 0 | 2.392535  | 5.394322  | -3.114935 |
| 40 | 1 | 0 | 3.384376  | 4.915186  | -3.202381 |
| 41 | 6 | 0 | 1.519323  | 4.859112  | -4.259032 |
| 42 | 1 | 0 | 0.512041  | 5.297573  | -4.140431 |
| 43 | 6 | 0 | 2.097412  | 5.276078  | -5.617040 |
| 44 | 1 | 0 | 1.445623  | 4.892463  | -6.409606 |
| 45 | 1 | 0 | 3.071443  | 4.784789  | -5.739961 |
| 46 | 6 | 0 | 2.256356  | 6.792839  | -5.722095 |
| 47 | 1 | 0 | 1.267133  | 7.268003  | -5.673297 |
| 48 | 1 | 0 | 2.688076  | 7.057455  | -6.693109 |
| 49 | 6 | 0 | 3.126654  | 7.325431  | -4.582821 |
| 50 | 1 | 0 | 4.143077  | 6.921673  | -4.685896 |
| 51 | 1 | 0 | 3.210878  | 8.415810  | -4.639497 |
| 52 | 6 | 0 | 2.551971  | 6.915566  | -3.226814 |
| 53 | 1 | 0 | 1.565682  | 7.374878  | -3.080210 |
| 54 | 1 | 0 | 3.189815  | 7.263774  | -2.407045 |
| 55 | 6 | 0 | 0.338676  | 2.855132  | -4.155402 |
| 56 | 1 | 0 | -0.594509 | 3.440363  | -4.133479 |
| 57 | 7 | 0 | -2.930503 | -3.651548 | 3.528595  |
| 58 | 7 | 0 | -0.304183 | -4.842750 | 3.265148  |
| 59 | 7 | 0 | 4.627585  | -0.712116 | 3.528595  |

|     |   |   |           |           |           |
|-----|---|---|-----------|-----------|-----------|
| 60  | 7 | 0 | 4.346036  | 2.157945  | 3.265148  |
| 61  | 6 | 0 | -3.481765 | -0.896428 | 2.890891  |
| 62  | 1 | 0 | -3.074686 | -1.117633 | 3.874262  |
| 63  | 6 | 0 | -3.659209 | -1.952866 | 1.986848  |
| 64  | 6 | 0 | -3.316801 | -3.338927 | 2.362175  |
| 65  | 1 | 0 | -3.435736 | -4.091192 | 1.566015  |
| 66  | 6 | 0 | -2.670853 | -5.051364 | 3.802277  |
| 67  | 1 | 0 | -2.764509 | -5.666637 | 2.889177  |
| 68  | 6 | 0 | -1.232385 | -5.207355 | 4.317675  |
| 69  | 1 | 0 | -1.123510 | -4.549409 | 5.198790  |
| 70  | 6 | 0 | -0.963493 | -6.659023 | 4.731818  |
| 71  | 1 | 0 | 0.062859  | -6.733971 | 5.107399  |
| 72  | 1 | 0 | -1.020659 | -7.287407 | 3.833459  |
| 73  | 6 | 0 | -1.968497 | -7.143526 | 5.777056  |
| 74  | 1 | 0 | -1.762738 | -8.186853 | 6.038561  |
| 75  | 1 | 0 | -1.850621 | -6.555434 | 6.697407  |
| 76  | 6 | 0 | -3.400475 | -6.989867 | 5.262356  |
| 77  | 1 | 0 | -4.120141 | -7.305375 | 6.025125  |
| 78  | 1 | 0 | -3.545294 | -7.649245 | 4.395757  |
| 79  | 6 | 0 | -3.674746 | -5.543001 | 4.851959  |
| 80  | 1 | 0 | -3.606014 | -4.883112 | 5.726630  |
| 81  | 1 | 0 | -4.687583 | -5.432644 | 4.449404  |
| 82  | 6 | 0 | 0.539750  | -3.929013 | 3.511395  |
| 83  | 1 | 0 | 0.563121  | -3.403369 | 4.478847  |
| 84  | 6 | 0 | 1.568632  | -3.518938 | 2.535330  |
| 85  | 6 | 0 | 1.617386  | -4.099045 | 1.260101  |
| 86  | 1 | 0 | 0.868930  | -4.843412 | 0.999104  |
| 87  | 6 | 0 | 2.598900  | -3.723914 | 0.350756  |
| 88  | 6 | 0 | 3.557170  | -2.772347 | 0.724293  |
| 89  | 1 | 0 | 4.324069  | -2.496502 | 0.004456  |
| 90  | 6 | 0 | 3.520837  | -2.192535 | 1.986848  |
| 91  | 6 | 0 | 2.517212  | -2.567083 | 2.890891  |
| 92  | 1 | 0 | 2.505241  | -2.103940 | 3.874262  |
| 93  | 6 | 0 | 4.549996  | -1.202971 | 2.362175  |
| 94  | 1 | 0 | 5.260944  | -0.929839 | 1.566015  |
| 95  | 6 | 0 | 5.710036  | 0.212655  | 3.802277  |
| 96  | 1 | 0 | 6.289707  | 0.439183  | 2.889177  |
| 97  | 6 | 0 | 5.125894  | 1.536400  | 4.317675  |
| 98  | 1 | 0 | 4.501659  | 1.301716  | 5.198790  |
| 99  | 6 | 0 | 6.248629  | 2.495102  | 4.731818  |
| 100 | 1 | 0 | 5.800360  | 3.421423  | 5.107399  |
| 101 | 1 | 0 | 6.821409  | 2.759787  | 3.833459  |
| 102 | 6 | 0 | 7.170724  | 1.866994  | 5.777056  |
| 103 | 1 | 0 | 6.602483  | 1.675032  | 6.697407  |
| 104 | 1 | 0 | 7.971391  | 2.566850  | 6.038561  |
| 105 | 6 | 0 | 7.753640  | 0.550036  | 5.262356  |
| 106 | 1 | 0 | 8.397087  | 0.754308  | 4.395757  |
| 107 | 1 | 0 | 8.386711  | 0.084540  | 6.025125  |
| 108 | 6 | 0 | 6.637753  | -0.410922 | 4.851959  |
| 109 | 1 | 0 | 6.031906  | -0.681344 | 5.726630  |
| 110 | 1 | 0 | 7.048599  | -1.343243 | 4.449404  |
| 111 | 6 | 0 | 3.132750  | 2.431944  | 3.511395  |
| 112 | 1 | 0 | 2.665844  | 2.189361  | 4.478847  |
| 113 | 7 | 0 | -5.284852 | -1.014427 | -1.845795 |
| 114 | 7 | 0 | -3.692864 | -0.425747 | -4.197463 |
| 115 | 7 | 0 | 2.215140  | -2.985240 | -4.197463 |
| 116 | 7 | 0 | 3.520945  | -4.069602 | -1.845795 |
| 117 | 6 | 0 | -4.179507 | -1.694426 | 0.724293  |
| 118 | 1 | 0 | -4.324069 | -2.496502 | 0.004456  |

|     |    |   |           |           |           |
|-----|----|---|-----------|-----------|-----------|
| 119 | 6  | 0 | -4.524454 | -0.388756 | 0.350756  |
| 120 | 6  | 0 | -5.067911 | -0.102881 | -0.991393 |
| 121 | 1  | 0 | -5.284646 | 0.956580  | -1.201882 |
| 122 | 6  | 0 | -5.867887 | -0.625165 | -3.114935 |
| 123 | 1  | 0 | -5.948864 | 0.473363  | -3.202381 |
| 124 | 6  | 0 | -4.967776 | -1.113784 | -4.259032 |
| 125 | 1  | 0 | -4.843854 | -2.205346 | -4.140431 |
| 126 | 6  | 0 | -5.617924 | -0.821627 | -5.617040 |
| 127 | 1  | 0 | -4.959808 | -1.194285 | -6.409606 |
| 128 | 1  | 0 | -5.679470 | 0.267553  | -5.739961 |
| 129 | 6  | 0 | -7.010949 | -1.442358 | -5.722095 |
| 130 | 1  | 0 | -7.455973 | -1.200785 | -6.693109 |
| 131 | 1  | 0 | -6.927842 | -2.536632 | -5.673297 |
| 132 | 6  | 0 | -7.907336 | -0.954954 | -4.582821 |
| 133 | 1  | 0 | -8.893744 | -1.427203 | -4.639497 |
| 134 | 1  | 0 | -8.065883 | 0.127174  | -4.685896 |
| 135 | 6  | 0 | -7.265041 | -1.247711 | -3.226814 |
| 136 | 1  | 0 | -7.169673 | -2.331518 | -3.080210 |
| 137 | 1  | 0 | -7.885520 | -0.869426 | -2.407045 |
| 138 | 6  | 0 | -2.641955 | -1.134264 | -4.155402 |
| 139 | 1  | 0 | -2.682187 | -2.235042 | -4.133479 |
| 140 | 6  | 0 | -1.288456 | -0.545639 | -4.152656 |
| 141 | 6  | 0 | -1.107248 | 0.843601  | -4.156113 |
| 142 | 1  | 0 | -1.986935 | 1.482844  | -4.157094 |
| 143 | 6  | 0 | 0.171690  | 1.388655  | -4.152656 |
| 144 | 6  | 0 | 1.284204  | 0.537104  | -4.156113 |
| 145 | 1  | 0 | 2.277648  | 0.979314  | -4.157094 |
| 146 | 6  | 0 | 1.116765  | -0.843016 | -4.152656 |
| 147 | 6  | 0 | -0.176956 | -1.380706 | -4.156113 |
| 148 | 1  | 0 | -0.290713 | -2.462158 | -4.157094 |
| 149 | 6  | 0 | 2.303279  | -1.720868 | -4.155402 |
| 150 | 1  | 0 | 3.276697  | -1.205321 | -4.133479 |
| 151 | 6  | 0 | 3.448453  | -3.745328 | -4.259032 |
| 152 | 1  | 0 | 4.331812  | -3.092227 | -4.140431 |
| 153 | 6  | 0 | 3.475353  | -4.769157 | -3.114935 |
| 154 | 1  | 0 | 2.564488  | -5.388548 | -3.202381 |
| 155 | 6  | 0 | 4.713070  | -5.667854 | -3.226814 |
| 156 | 1  | 0 | 4.695706  | -6.394348 | -2.407045 |
| 157 | 1  | 0 | 5.603990  | -5.043359 | -3.080210 |
| 158 | 6  | 0 | 4.780682  | -6.370477 | -4.582821 |
| 159 | 1  | 0 | 3.922806  | -7.048847 | -4.685896 |
| 160 | 1  | 0 | 5.682866  | -6.988607 | -4.639497 |
| 161 | 6  | 0 | 4.754593  | -5.350481 | -5.722095 |
| 162 | 1  | 0 | 5.660708  | -4.731371 | -5.673297 |
| 163 | 1  | 0 | 4.767897  | -5.856670 | -6.693109 |
| 164 | 6  | 0 | 3.520511  | -4.454451 | -5.617040 |
| 165 | 1  | 0 | 2.608027  | -5.052342 | -5.739961 |
| 166 | 1  | 0 | 3.514185  | -3.698178 | -6.409606 |
| 167 | 6  | 0 | 2.623053  | -4.337499 | -0.991393 |
| 168 | 1  | 0 | 1.813900  | -5.054928 | -1.201882 |
| 169 | 54 | 0 | -0.861859 | -2.247724 | -0.679513 |
| 170 | 54 | 0 | -1.515657 | 1.870253  | -0.679513 |
| 171 | 54 | 0 | 2.377515  | 0.377471  | -0.679513 |

4Xe@CC3 T cc3-rc

Standard orientation:

Center Atomic Atomic Coordinates (Angstroms)

| Number | Number | Type | X          | Y         | Z          |
|--------|--------|------|------------|-----------|------------|
| 1      | 7      | 0    | -5.565537  | -1.133104 | 0.904947   |
| 2      | 7      | 0    | -5.565537  | 1.133104  | -0.904947  |
| 3      | 7      | 0    | -1.133104  | 0.904947  | -5.565537  |
| 4      | 7      | 0    | 1.133104   | -0.904947 | -5.565537  |
| 5      | 6      | 0    | -3.289567  | -2.823902 | 1.400177   |
| 6      | 1      | 0    | -3.918407  | -3.054870 | 0.543633   |
| 7      | 6      | 0    | -3.611541  | -1.709899 | 2.186879   |
| 8      | 6      | 0    | -4.781503  | -0.869208 | 1.866004   |
| 9      | 1      | 0    | -4.940701  | -0.001908 | 2.526505   |
| 10     | 6      | 0    | -6.717443  | -0.272796 | 0.717633   |
| 11     | 1      | 0    | -6.690053  | 0.594276  | 1.402032   |
| 12     | 6      | 0    | -6.717443  | 0.272796  | -0.717633  |
| 13     | 1      | 0    | -6.690053  | -0.594276 | -1.402032  |
| 14     | 6      | 0    | -7.988563  | 1.088918  | -0.982936  |
| 15     | 1      | 0    | -7.965093  | 1.450781  | -2.016671  |
| 16     | 1      | 0    | -7.968221  | 1.974738  | -0.334762  |
| 17     | 6      | 0    | -9.251821  | 0.270694  | -0.715163  |
| 18     | 1      | 0    | -10.140497 | 0.884845  | -0.894945  |
| 19     | 1      | 0    | -9.298295  | -0.570823 | -1.419743  |
| 20     | 6      | 0    | -9.251821  | -0.270694 | 0.715163   |
| 21     | 1      | 0    | -10.140497 | -0.884845 | 0.894945   |
| 22     | 1      | 0    | -9.298295  | 0.570823  | 1.419743   |
| 23     | 6      | 0    | -7.988563  | -1.088918 | 0.982936   |
| 24     | 1      | 0    | -7.968221  | -1.974738 | 0.334762   |
| 25     | 1      | 0    | -7.965093  | -1.450781 | 2.016671   |
| 26     | 6      | 0    | -4.781503  | 0.869208  | -1.866004  |
| 27     | 1      | 0    | -4.940701  | 0.001908  | -2.526505  |
| 28     | 6      | 0    | -3.611541  | 1.709899  | -2.186879  |
| 29     | 6      | 0    | -3.289567  | 2.823902  | -1.400177  |
| 30     | 1      | 0    | -3.918407  | 3.054870  | -0.543633  |
| 31     | 6      | 0    | -2.186879  | 3.611541  | -1.709899  |
| 32     | 6      | 0    | -1.400177  | 3.289567  | -2.823902  |
| 33     | 1      | 0    | -0.543633  | 3.918407  | -3.054870  |
| 34     | 6      | 0    | -1.709899  | 2.186879  | -3.611541  |
| 35     | 6      | 0    | -2.823902  | 1.400177  | -3.289567  |
| 36     | 1      | 0    | -3.054870  | 0.543633  | -3.918407  |
| 37     | 6      | 0    | -0.869208  | 1.866004  | -4.781503  |
| 38     | 1      | 0    | -0.001908  | 2.526505  | -4.940701  |
| 39     | 6      | 0    | -0.272796  | 0.717633  | -6.717443  |
| 40     | 1      | 0    | 0.594276   | 1.402032  | -6.690053  |
| 41     | 6      | 0    | 0.272796   | -0.717633 | -6.717443  |
| 42     | 1      | 0    | -0.594276  | -1.402032 | -6.690053  |
| 43     | 6      | 0    | 1.088918   | -0.982936 | -7.988563  |
| 44     | 1      | 0    | 1.450781   | -2.016671 | -7.965093  |
| 45     | 1      | 0    | 1.974738   | -0.334762 | -7.968221  |
| 46     | 6      | 0    | 0.270694   | -0.715163 | -9.251821  |
| 47     | 1      | 0    | -0.570823  | -1.419743 | -9.298295  |
| 48     | 1      | 0    | 0.884845   | -0.894945 | -10.140497 |
| 49     | 6      | 0    | -0.270694  | 0.715163  | -9.251821  |
| 50     | 1      | 0    | 0.570823   | 1.419743  | -9.298295  |
| 51     | 1      | 0    | -0.884845  | 0.894945  | -10.140497 |
| 52     | 6      | 0    | -1.088918  | 0.982936  | -7.988563  |
| 53     | 1      | 0    | -1.974738  | 0.334762  | -7.968221  |
| 54     | 1      | 0    | -1.450781  | 2.016671  | -7.965093  |
| 55     | 6      | 0    | 0.869208   | -1.866004 | -4.781503  |
| 56     | 1      | 0    | 0.001908   | -2.526505 | -4.940701  |
| 57     | 7      | 0    | -1.133104  | -0.904947 | 5.565537   |

|     |   |   |           |           |           |
|-----|---|---|-----------|-----------|-----------|
| 58  | 7 | 0 | 1.133104  | 0.904947  | 5.565537  |
| 59  | 7 | 0 | 0.904947  | 5.565537  | 1.133104  |
| 60  | 7 | 0 | -0.904947 | 5.565537  | -1.133104 |
| 61  | 6 | 0 | -2.823902 | -1.400177 | 3.289567  |
| 62  | 1 | 0 | -3.054870 | -0.543633 | 3.918407  |
| 63  | 6 | 0 | -1.709899 | -2.186879 | 3.611541  |
| 64  | 6 | 0 | -0.869208 | -1.866004 | 4.781503  |
| 65  | 1 | 0 | -0.001908 | -2.526505 | 4.940701  |
| 66  | 6 | 0 | -0.272796 | -0.717633 | 6.717443  |
| 67  | 1 | 0 | 0.594276  | -1.402032 | 6.690053  |
| 68  | 6 | 0 | 0.272796  | 0.717633  | 6.717443  |
| 69  | 1 | 0 | -0.594276 | 1.402032  | 6.690053  |
| 70  | 6 | 0 | 1.088918  | 0.982936  | 7.988563  |
| 71  | 1 | 0 | 1.450781  | 2.016671  | 7.965093  |
| 72  | 1 | 0 | 1.974738  | 0.334762  | 7.968221  |
| 73  | 6 | 0 | 0.270694  | 0.715163  | 9.251821  |
| 74  | 1 | 0 | 0.884845  | 0.894945  | 10.140497 |
| 75  | 1 | 0 | -0.570823 | 1.419743  | 9.298295  |
| 76  | 6 | 0 | -0.270694 | -0.715163 | 9.251821  |
| 77  | 1 | 0 | -0.884845 | -0.894945 | 10.140497 |
| 78  | 1 | 0 | 0.570823  | -1.419743 | 9.298295  |
| 79  | 6 | 0 | -1.088918 | -0.982936 | 7.988563  |
| 80  | 1 | 0 | -1.974738 | -0.334762 | 7.968221  |
| 81  | 1 | 0 | -1.450781 | -2.016671 | 7.965093  |
| 82  | 6 | 0 | 0.869208  | 1.866004  | 4.781503  |
| 83  | 1 | 0 | 0.001908  | 2.526505  | 4.940701  |
| 84  | 6 | 0 | 1.709899  | 2.186879  | 3.611541  |
| 85  | 6 | 0 | 2.823902  | 1.400177  | 3.289567  |
| 86  | 1 | 0 | 3.054870  | 0.543633  | 3.918407  |
| 87  | 6 | 0 | 3.611541  | 1.709899  | 2.186879  |
| 88  | 6 | 0 | 3.289567  | 2.823902  | 1.400177  |
| 89  | 1 | 0 | 3.918407  | 3.054870  | 0.543633  |
| 90  | 6 | 0 | 2.186879  | 3.611541  | 1.709899  |
| 91  | 6 | 0 | 1.400177  | 3.289567  | 2.823902  |
| 92  | 1 | 0 | 0.543633  | 3.918407  | 3.054870  |
| 93  | 6 | 0 | 1.866004  | 4.781503  | 0.869208  |
| 94  | 1 | 0 | 2.526505  | 4.940701  | 0.001908  |
| 95  | 6 | 0 | 0.717633  | 6.717443  | 0.272796  |
| 96  | 1 | 0 | 1.402032  | 6.690053  | -0.594276 |
| 97  | 6 | 0 | -0.717633 | 6.717443  | -0.272796 |
| 98  | 1 | 0 | -1.402032 | 6.690053  | 0.594276  |
| 99  | 6 | 0 | -0.982936 | 7.988563  | -1.088918 |
| 100 | 1 | 0 | -2.016671 | 7.965093  | -1.450781 |
| 101 | 1 | 0 | -0.334762 | 7.968221  | -1.974738 |
| 102 | 6 | 0 | -0.715163 | 9.251821  | -0.270694 |
| 103 | 1 | 0 | -1.419743 | 9.298295  | 0.570823  |
| 104 | 1 | 0 | -0.894945 | 10.140497 | -0.884845 |
| 105 | 6 | 0 | 0.715163  | 9.251821  | 0.270694  |
| 106 | 1 | 0 | 1.419743  | 9.298295  | -0.570823 |
| 107 | 1 | 0 | 0.894945  | 10.140497 | 0.884845  |
| 108 | 6 | 0 | 0.982936  | 7.988563  | 1.088918  |
| 109 | 1 | 0 | 0.334762  | 7.968221  | 1.974738  |
| 110 | 1 | 0 | 2.016671  | 7.965093  | 1.450781  |
| 111 | 6 | 0 | -1.866004 | 4.781503  | -0.869208 |
| 112 | 1 | 0 | -2.526505 | 4.940701  | -0.001908 |
| 113 | 7 | 0 | -0.904947 | -5.565537 | 1.133104  |
| 114 | 7 | 0 | 0.904947  | -5.565537 | -1.133104 |
| 115 | 7 | 0 | 5.565537  | -1.133104 | -0.904947 |
| 116 | 7 | 0 | 5.565537  | 1.133104  | 0.904947  |

|     |    |   |           |            |           |
|-----|----|---|-----------|------------|-----------|
| 117 | 6  | 0 | -1.400177 | -3.289567  | 2.823902  |
| 118 | 1  | 0 | -0.543633 | -3.918407  | 3.054870  |
| 119 | 6  | 0 | -2.186879 | -3.611541  | 1.709899  |
| 120 | 6  | 0 | -1.866004 | -4.781503  | 0.869208  |
| 121 | 1  | 0 | -2.526505 | -4.940701  | 0.001908  |
| 122 | 6  | 0 | -0.717633 | -6.717443  | 0.272796  |
| 123 | 1  | 0 | -1.402032 | -6.690053  | -0.594276 |
| 124 | 6  | 0 | 0.717633  | -6.717443  | -0.272796 |
| 125 | 1  | 0 | 1.402032  | -6.690053  | 0.594276  |
| 126 | 6  | 0 | 0.982936  | -7.988563  | -1.088918 |
| 127 | 1  | 0 | 2.016671  | -7.965093  | -1.450781 |
| 128 | 1  | 0 | 0.334762  | -7.968221  | -1.974738 |
| 129 | 6  | 0 | 0.715163  | -9.251821  | -0.270694 |
| 130 | 1  | 0 | 0.894945  | -10.140497 | -0.884845 |
| 131 | 1  | 0 | 1.419743  | -9.298295  | 0.570823  |
| 132 | 6  | 0 | -0.715163 | -9.251821  | 0.270694  |
| 133 | 1  | 0 | -0.894945 | -10.140497 | 0.884845  |
| 134 | 1  | 0 | -1.419743 | -9.298295  | -0.570823 |
| 135 | 6  | 0 | -0.982936 | -7.988563  | 1.088918  |
| 136 | 1  | 0 | -0.334762 | -7.968221  | 1.974738  |
| 137 | 1  | 0 | -2.016671 | -7.965093  | 1.450781  |
| 138 | 6  | 0 | 1.866004  | -4.781503  | -0.869208 |
| 139 | 1  | 0 | 2.526505  | -4.940701  | -0.001908 |
| 140 | 6  | 0 | 2.186879  | -3.611541  | -1.709899 |
| 141 | 6  | 0 | 1.400177  | -3.289567  | -2.823902 |
| 142 | 1  | 0 | 0.543633  | -3.918407  | -3.054870 |
| 143 | 6  | 0 | 1.709899  | -2.186879  | -3.611541 |
| 144 | 6  | 0 | 2.823902  | -1.400177  | -3.289567 |
| 145 | 1  | 0 | 3.054870  | -0.543633  | -3.918407 |
| 146 | 6  | 0 | 3.611541  | -1.709899  | -2.186879 |
| 147 | 6  | 0 | 3.289567  | -2.823902  | -1.400177 |
| 148 | 1  | 0 | 3.918407  | -3.054870  | -0.543633 |
| 149 | 6  | 0 | 4.781503  | -0.869208  | -1.866004 |
| 150 | 1  | 0 | 4.940701  | -0.001908  | -2.526505 |
| 151 | 6  | 0 | 6.717443  | -0.272796  | -0.717633 |
| 152 | 1  | 0 | 6.690053  | 0.594276   | -1.402032 |
| 153 | 6  | 0 | 6.717443  | 0.272796   | 0.717633  |
| 154 | 1  | 0 | 6.690053  | -0.594276  | 1.402032  |
| 155 | 6  | 0 | 7.988563  | 1.088918   | 0.982936  |
| 156 | 1  | 0 | 7.965093  | 1.450781   | 2.016671  |
| 157 | 1  | 0 | 7.968221  | 1.974738   | 0.334762  |
| 158 | 6  | 0 | 9.251821  | 0.270694   | 0.715163  |
| 159 | 1  | 0 | 9.298295  | -0.570823  | 1.419743  |
| 160 | 1  | 0 | 10.140497 | 0.884845   | 0.894945  |
| 161 | 6  | 0 | 9.251821  | -0.270694  | -0.715163 |
| 162 | 1  | 0 | 9.298295  | 0.570823   | -1.419743 |
| 163 | 1  | 0 | 10.140497 | -0.884845  | -0.894945 |
| 164 | 6  | 0 | 7.988563  | -1.088918  | -0.982936 |
| 165 | 1  | 0 | 7.968221  | -1.974738  | -0.334762 |
| 166 | 1  | 0 | 7.965093  | -1.450781  | -2.016671 |
| 167 | 6  | 0 | 4.781503  | 0.869208   | 1.866004  |
| 168 | 1  | 0 | 4.940701  | 0.001908   | 2.526505  |
| 169 | 54 | 0 | 1.470786  | -1.470786  | 1.470786  |
| 170 | 54 | 0 | -1.470786 | 1.470786   | 1.470786  |
| 171 | 54 | 0 | -1.470786 | -1.470786  | -1.470786 |
| 172 | 54 | 0 | 1.470786  | 1.470786   | -1.470786 |

-----

4Xe@CC3 C1 cc3-rcx



## Standard orientation:

| Center<br>Number | Atomic<br>Number | Atomic<br>Type | Coordinates (Angstroms) |           |           |
|------------------|------------------|----------------|-------------------------|-----------|-----------|
|                  |                  |                | X                       | Y         | Z         |
| 1                | 7                | 0              | -4.804906               | 0.715158  | 3.068899  |
| 2                | 7                | 0              | -3.383492               | 3.228672  | 3.334169  |
| 3                | 7                | 0              | -0.557616               | 5.354259  | -2.044085 |
| 4                | 7                | 0              | -0.112445               | 3.718109  | -4.395865 |
| 5                | 6                | 0              | -4.241532               | -1.271260 | 1.062192  |
| 6                | 1                | 0              | -4.912088               | -0.457309 | 0.797208  |
| 7                | 6                | 0              | -3.679236               | -1.285805 | 2.345357  |
| 8                | 6                | 0              | -3.990993               | -0.223717 | 3.321803  |
| 9                | 1                | 0              | -3.481189               | -0.306721 | 4.295031  |
| 10               | 6                | 0              | -5.082565               | 1.670619  | 4.123205  |
| 11               | 1                | 0              | -4.436219               | 1.500734  | 5.003226  |
| 12               | 6                | 0              | -4.800089               | 3.090157  | 3.610818  |
| 13               | 1                | 0              | -5.406149               | 3.240672  | 2.699243  |
| 14               | 6                | 0              | -5.199348               | 4.131525  | 4.663485  |
| 15               | 1                | 0              | -4.999676               | 5.131410  | 4.262844  |
| 16               | 1                | 0              | -4.547631               | 4.002302  | 5.537424  |
| 17               | 6                | 0              | -6.664637               | 3.986377  | 5.074546  |
| 18               | 1                | 0              | -6.914213               | 4.729717  | 5.839022  |
| 19               | 1                | 0              | -7.308956               | 4.191349  | 4.208787  |
| 20               | 6                | 0              | -6.944996               | 2.572763  | 5.586215  |
| 21               | 1                | 0              | -8.002396               | 2.460116  | 5.848170  |
| 22               | 1                | 0              | -6.369406               | 2.400847  | 6.505956  |
| 23               | 6                | 0              | -6.552412               | 1.531097  | 4.538561  |
| 24               | 1                | 0              | -7.174039               | 1.645531  | 3.640947  |
| 25               | 1                | 0              | -6.717576               | 0.514602  | 4.912144  |
| 26               | 6                | 0              | -3.042659               | 3.612444  | 2.174655  |
| 27               | 1                | 0              | -3.784598               | 3.808716  | 1.384149  |
| 28               | 6                | 0              | -1.634229               | 3.846539  | 1.800007  |
| 29               | 6                | 0              | -0.598219               | 3.602290  | 2.710757  |
| 30               | 1                | 0              | -0.852512               | 3.227985  | 3.699127  |
| 31               | 6                | 0              | 0.726078                | 3.829215  | 2.345357  |
| 32               | 6                | 0              | 1.019823                | 4.308905  | 1.062192  |
| 33               | 1                | 0              | 2.060003                | 4.482648  | 0.797208  |
| 34               | 6                | 0              | 0.000000                | 4.552264  | 0.155885  |
| 35               | 6                | 0              | -1.330789               | 4.323772  | 0.530247  |
| 36               | 1                | 0              | -2.116725               | 4.524579  | -0.193864 |
| 37               | 6                | 0              | 0.331756                | 5.060093  | -1.189503 |
| 38               | 1                | 0              | 1.406124                | 5.182629  | -1.400865 |
| 39               | 6                | 0              | -0.119477               | 5.900836  | -3.313459 |
| 40               | 1                | 0              | 0.981804                | 5.883956  | -3.402246 |
| 41               | 6                | 0              | -0.687072               | 5.047743  | -4.457074 |
| 42               | 1                | 0              | -1.785064               | 5.019919  | -4.336673 |
| 43               | 6                | 0              | -0.340504               | 5.669792  | -5.815294 |
| 44               | 1                | 0              | -0.770789               | 5.047465  | -6.607558 |
| 45               | 1                | 0              | 0.749690                | 5.635060  | -5.939422 |
| 46               | 6                | 0              | -0.835749               | 7.112373  | -5.919358 |
| 47               | 1                | 0              | -1.932977               | 7.126492  | -5.868804 |
| 48               | 1                | 0              | -0.557215               | 7.534456  | -6.890755 |
| 49               | 6                | 0              | -0.269069               | 7.961805  | -4.780832 |
| 50               | 1                | 0              | 0.822658                | 8.023555  | -4.885667 |
| 51               | 1                | 0              | -0.651977               | 8.986247  | -4.836682 |
| 52               | 6                | 0              | -0.615689               | 7.347812  | -3.424408 |
| 53               | 1                | 0              | -1.703519               | 7.349159  | -3.276303 |
| 54               | 1                | 0              | -0.182838               | 7.932094  | -2.604988 |

|     |   |   |           |           |           |
|-----|---|---|-----------|-----------|-----------|
| 55  | 6 | 0 | -0.908409 | 2.732252  | -4.346521 |
| 56  | 1 | 0 | -2.001567 | 2.866400  | -4.317984 |
| 57  | 7 | 0 | -1.104366 | -4.544526 | 3.334169  |
| 58  | 7 | 0 | 1.783108  | -4.518750 | 3.068899  |
| 59  | 7 | 0 | 4.487858  | 1.315854  | 3.334169  |
| 60  | 7 | 0 | 3.021798  | 3.803592  | 3.068899  |
| 61  | 6 | 0 | -2.820565 | -2.319218 | 2.710757  |
| 62  | 1 | 0 | -2.369261 | -2.352289 | 3.699127  |
| 63  | 6 | 0 | -2.514086 | -3.338553 | 1.800007  |
| 64  | 6 | 0 | -1.607139 | -4.441242 | 2.174655  |
| 65  | 1 | 0 | -1.406145 | -5.181916 | 1.384149  |
| 66  | 6 | 0 | -0.276110 | -5.702078 | 3.610818  |
| 67  | 1 | 0 | -0.103429 | -6.302198 | 2.699243  |
| 68  | 6 | 0 | 1.094484  | -5.236940 | 4.123205  |
| 69  | 1 | 0 | 0.918435  | -4.592246 | 5.003226  |
| 70  | 6 | 0 | 1.950237  | -6.440104 | 4.538561  |
| 71  | 1 | 0 | 2.913130  | -6.074892 | 4.912144  |
| 72  | 1 | 0 | 2.161948  | -7.035665 | 3.640947  |
| 73  | 6 | 0 | 1.244420  | -7.300924 | 5.586215  |
| 74  | 1 | 0 | 1.870675  | -8.160336 | 5.848170  |
| 75  | 1 | 0 | 1.105508  | -6.716491 | 6.505956  |
| 76  | 6 | 0 | -0.119985 | -7.764934 | 5.074546  |
| 77  | 1 | 0 | -0.638949 | -8.352742 | 5.839022  |
| 78  | 1 | 0 | 0.024663  | -8.425416 | 4.208787  |
| 79  | 6 | 0 | -0.978332 | -6.568530 | 4.663485  |
| 80  | 1 | 0 | -1.192280 | -5.939515 | 5.537424  |
| 81  | 1 | 0 | -1.944094 | -6.895551 | 4.262844  |
| 82  | 6 | 0 | 2.189241  | -3.344443 | 3.321803  |
| 83  | 1 | 0 | 2.006223  | -2.861437 | 4.295031  |
| 84  | 6 | 0 | 2.953158  | -2.543410 | 2.345357  |
| 85  | 6 | 0 | 3.221710  | -3.037645 | 1.062192  |
| 86  | 1 | 0 | 2.852085  | -4.025339 | 0.797208  |
| 87  | 6 | 0 | 3.942376  | -2.276132 | 0.155885  |
| 88  | 6 | 0 | 4.409891  | -1.009389 | 0.530247  |
| 89  | 1 | 0 | 4.976763  | -0.429153 | -0.193864 |
| 90  | 6 | 0 | 4.148315  | -0.507986 | 1.800007  |
| 91  | 6 | 0 | 3.418784  | -1.283072 | 2.710757  |
| 92  | 1 | 0 | 3.221773  | -0.875696 | 3.699127  |
| 93  | 6 | 0 | 4.649798  | 0.828798  | 2.174655  |
| 94  | 1 | 0 | 5.190744  | 1.373200  | 1.384149  |
| 95  | 6 | 0 | 5.076199  | 2.611920  | 3.610818  |
| 96  | 1 | 0 | 5.509578  | 3.061527  | 2.699243  |
| 97  | 6 | 0 | 3.988081  | 3.566321  | 4.123205  |
| 98  | 1 | 0 | 3.517784  | 3.091511  | 5.003226  |
| 99  | 6 | 0 | 4.602175  | 4.909007  | 4.538561  |
| 100 | 1 | 0 | 3.804446  | 5.560291  | 4.912144  |
| 101 | 1 | 0 | 5.012091  | 5.390135  | 3.640947  |
| 102 | 6 | 0 | 5.700576  | 4.728162  | 5.586215  |
| 103 | 1 | 0 | 5.263898  | 4.315644  | 6.505956  |
| 104 | 1 | 0 | 6.131721  | 5.700220  | 5.848170  |
| 105 | 6 | 0 | 6.784622  | 3.778557  | 5.074546  |
| 106 | 1 | 0 | 7.284293  | 4.234067  | 4.208787  |
| 107 | 1 | 0 | 7.553161  | 3.623025  | 5.839022  |
| 108 | 6 | 0 | 6.177680  | 2.437005  | 4.663485  |
| 109 | 1 | 0 | 5.739911  | 1.937213  | 5.537424  |
| 110 | 1 | 0 | 6.943769  | 1.764141  | 4.262844  |
| 111 | 6 | 0 | 1.801752  | 3.568160  | 3.321803  |
| 112 | 1 | 0 | 1.474966  | 3.168159  | 4.295031  |
| 113 | 7 | 0 | -4.358117 | -3.160040 | -2.044085 |

|     |    |   |           |           |           |
|-----|----|---|-----------|-----------|-----------|
| 114 | 7  | 0 | -3.163755 | -1.956435 | -4.395865 |
| 115 | 7  | 0 | 3.276199  | -1.761675 | -4.395865 |
| 116 | 7  | 0 | 4.915733  | -2.194220 | -2.044085 |
| 117 | 6  | 0 | -3.079102 | -3.314383 | 0.530247  |
| 118 | 1  | 0 | -2.860039 | -4.095427 | -0.193864 |
| 119 | 6  | 0 | -3.942376 | -2.276132 | 0.155885  |
| 120 | 6  | 0 | -4.548047 | -2.242738 | -1.189503 |
| 121 | 1  | 0 | -5.191350 | -1.373575 | -1.400865 |
| 122 | 6  | 0 | -5.050535 | -3.053888 | -3.313459 |
| 123 | 1  | 0 | -5.586557 | -2.091711 | -3.402246 |
| 124 | 6  | 0 | -4.027938 | -3.118893 | -4.457074 |
| 125 | 1  | 0 | -3.454846 | -4.055870 | -4.336673 |
| 126 | 6  | 0 | -4.739932 | -3.129781 | -5.815294 |
| 127 | 1  | 0 | -3.985839 | -3.191255 | -6.607558 |
| 128 | 1  | 0 | -5.254950 | -2.168280 | -5.939422 |
| 129 | 6  | 0 | -5.741621 | -4.279966 | -5.919358 |
| 130 | 1  | 0 | -6.246423 | -4.249790 | -6.890755 |
| 131 | 1  | 0 | -5.205235 | -5.237253 | -5.868804 |
| 132 | 6  | 0 | -6.760591 | -4.213923 | -4.780832 |
| 133 | 1  | 0 | -7.456330 | -5.057752 | -4.836682 |
| 134 | 1  | 0 | -7.359932 | -3.299335 | -4.885667 |
| 135 | 6  | 0 | -6.055547 | -4.207109 | -3.424408 |
| 136 | 1  | 0 | -5.512799 | -5.149870 | -3.276303 |
| 137 | 1  | 0 | -6.777976 | -4.124390 | -2.604988 |
| 138 | 6  | 0 | -1.911995 | -2.152831 | -4.346521 |
| 139 | 1  | 0 | -1.481592 | -3.166608 | -4.317984 |
| 140 | 6  | 0 | -0.932976 | -1.037691 | -4.346204 |
| 141 | 6  | 0 | -1.361236 | 0.296131  | -4.347461 |
| 142 | 1  | 0 | -2.429340 | 0.499852  | -4.348970 |
| 143 | 6  | 0 | -0.432179 | 1.326826  | -4.346204 |
| 144 | 6  | 0 | 0.937075  | 1.030799  | -4.347461 |
| 145 | 1  | 0 | 1.647554  | 1.853945  | -4.348970 |
| 146 | 6  | 0 | 1.365155  | -0.289135 | -4.346204 |
| 147 | 6  | 0 | 0.424161  | -1.326930 | -4.347461 |
| 148 | 1  | 0 | 0.781786  | -2.353796 | -4.348970 |
| 149 | 6  | 0 | 2.820404  | -0.579420 | -4.346521 |
| 150 | 1  | 0 | 3.483159  | 0.300208  | -4.317984 |
| 151 | 6  | 0 | 4.715010  | -1.928850 | -4.457074 |
| 152 | 1  | 0 | 5.239910  | -0.964049 | -4.336673 |
| 153 | 6  | 0 | 5.170012  | -2.846948 | -3.313459 |
| 154 | 1  | 0 | 4.604754  | -3.792245 | -3.402246 |
| 155 | 6  | 0 | 6.671237  | -3.140703 | -3.424408 |
| 156 | 1  | 0 | 6.960814  | -3.807704 | -2.604988 |
| 157 | 1  | 0 | 7.216318  | -2.199289 | -3.276303 |
| 158 | 6  | 0 | 7.029660  | -3.747882 | -4.780832 |
| 159 | 1  | 0 | 6.537274  | -4.724220 | -4.885667 |
| 160 | 1  | 0 | 8.108306  | -3.928495 | -4.836682 |
| 161 | 6  | 0 | 6.577370  | -2.832406 | -5.919358 |
| 162 | 1  | 0 | 7.138212  | -1.889239 | -5.868804 |
| 163 | 1  | 0 | 6.803638  | -3.284666 | -6.890755 |
| 164 | 6  | 0 | 5.080436  | -2.540011 | -5.815294 |
| 165 | 1  | 0 | 4.505260  | -3.466780 | -5.939422 |
| 166 | 1  | 0 | 4.756627  | -1.856210 | -6.607558 |
| 167 | 6  | 0 | 4.216291  | -2.817355 | -1.189503 |
| 168 | 1  | 0 | 3.785226  | -3.809053 | -1.400865 |
| 169 | 54 | 0 | 0.178304  | -2.390153 | -0.861816 |
| 170 | 54 | 0 | 0.000000  | 0.000000  | 2.696002  |
| 171 | 54 | 0 | -2.159085 | 1.040661  | -0.861816 |
| 172 | 54 | 0 | 1.980781  | 1.349492  | -0.861816 |

-----  
5Xe@CC3 T cc3-xexx

Standard orientation:

| Center<br>Number | Atomic<br>Number | Atomic<br>Type | Coordinates (Angstroms) |           |            |
|------------------|------------------|----------------|-------------------------|-----------|------------|
|                  |                  |                | X                       | Y         | Z          |
| 1                | 7                | 0              | -5.545360               | -1.125960 | 0.887581   |
| 2                | 7                | 0              | -5.545360               | 1.125960  | -0.887581  |
| 3                | 7                | 0              | -1.125960               | 0.887581  | -5.545360  |
| 4                | 7                | 0              | 1.125960                | -0.887581 | -5.545360  |
| 5                | 6                | 0              | -3.206034               | -2.744408 | 1.317485   |
| 6                | 1                | 0              | -3.848223               | -2.991553 | 0.476042   |
| 7                | 6                | 0              | -3.531616               | -1.630916 | 2.104601   |
| 8                | 6                | 0              | -4.731587               | -0.823598 | 1.811687   |
| 9                | 1                | 0              | -4.889759               | 0.050100  | 2.463760   |
| 10               | 6                | 0              | -6.710771               | -0.282165 | 0.714348   |
| 11               | 1                | 0              | -6.692993               | 0.577176  | 1.409008   |
| 12               | 6                | 0              | -6.710771               | 0.282165  | -0.714348  |
| 13               | 1                | 0              | -6.692993               | -0.577176 | -1.409008  |
| 14               | 6                | 0              | -7.976675               | 1.109324  | -0.962886  |
| 15               | 1                | 0              | -7.954631               | 1.490625  | -1.989584  |
| 16               | 1                | 0              | -7.952984               | 1.982212  | -0.297577  |
| 17               | 6                | 0              | -9.240650               | 0.286847  | -0.709072  |
| 18               | 1                | 0              | -10.129169              | 0.905449  | -0.873516  |
| 19               | 1                | 0              | -9.289483               | -0.538688 | -1.432150  |
| 20               | 6                | 0              | -9.240650               | -0.286847 | 0.709072   |
| 21               | 1                | 0              | -10.129169              | -0.905449 | 0.873516   |
| 22               | 1                | 0              | -9.289483               | 0.538688  | 1.432150   |
| 23               | 6                | 0              | -7.976675               | -1.109324 | 0.962886   |
| 24               | 1                | 0              | -7.952984               | -1.982212 | 0.297577   |
| 25               | 1                | 0              | -7.954631               | -1.490625 | 1.989584   |
| 26               | 6                | 0              | -4.731587               | 0.823598  | -1.811687  |
| 27               | 1                | 0              | -4.889759               | -0.050100 | -2.463760  |
| 28               | 6                | 0              | -3.531616               | 1.630916  | -2.104601  |
| 29               | 6                | 0              | -3.206034               | 2.744408  | -1.317485  |
| 30               | 1                | 0              | -3.848223               | 2.991553  | -0.476042  |
| 31               | 6                | 0              | -2.104601               | 3.531616  | -1.630916  |
| 32               | 6                | 0              | -1.317485               | 3.206034  | -2.744408  |
| 33               | 1                | 0              | -0.476042               | 3.848223  | -2.991553  |
| 34               | 6                | 0              | -1.630916               | 2.104601  | -3.531616  |
| 35               | 6                | 0              | -2.744408               | 1.317485  | -3.206034  |
| 36               | 1                | 0              | -2.991553               | 0.476042  | -3.848223  |
| 37               | 6                | 0              | -0.823598               | 1.811687  | -4.731587  |
| 38               | 1                | 0              | 0.050100                | 2.463760  | -4.889759  |
| 39               | 6                | 0              | -0.282165               | 0.714348  | -6.710771  |
| 40               | 1                | 0              | 0.577176                | 1.409008  | -6.692993  |
| 41               | 6                | 0              | 0.282165                | -0.714348 | -6.710771  |
| 42               | 1                | 0              | -0.577176               | -1.409008 | -6.692993  |
| 43               | 6                | 0              | 1.109324                | -0.962886 | -7.976675  |
| 44               | 1                | 0              | 1.490625                | -1.989584 | -7.954631  |
| 45               | 1                | 0              | 1.982212                | -0.297577 | -7.952984  |
| 46               | 6                | 0              | 0.286847                | -0.709072 | -9.240650  |
| 47               | 1                | 0              | -0.538688               | -1.432150 | -9.289483  |
| 48               | 1                | 0              | 0.905449                | -0.873516 | -10.129169 |
| 49               | 6                | 0              | -0.286847               | 0.709072  | -9.240650  |
| 50               | 1                | 0              | 0.538688                | 1.432150  | -9.289483  |
| 51               | 1                | 0              | -0.905449               | 0.873516  | -10.129169 |

|     |   |   |           |           |           |
|-----|---|---|-----------|-----------|-----------|
| 52  | 6 | 0 | -1.109324 | 0.962886  | -7.976675 |
| 53  | 1 | 0 | -1.982212 | 0.297577  | -7.952984 |
| 54  | 1 | 0 | -1.490625 | 1.989584  | -7.954631 |
| 55  | 6 | 0 | 0.823598  | -1.811687 | -4.731587 |
| 56  | 1 | 0 | -0.050100 | -2.463760 | -4.889759 |
| 57  | 7 | 0 | -1.125960 | -0.887581 | 5.545360  |
| 58  | 7 | 0 | 1.125960  | 0.887581  | 5.545360  |
| 59  | 7 | 0 | 0.887581  | 5.545360  | 1.125960  |
| 60  | 7 | 0 | -0.887581 | 5.545360  | -1.125960 |
| 61  | 6 | 0 | -2.744408 | -1.317485 | 3.206034  |
| 62  | 1 | 0 | -2.991553 | -0.476042 | 3.848223  |
| 63  | 6 | 0 | -1.630916 | -2.104601 | 3.531616  |
| 64  | 6 | 0 | -0.823598 | -1.811687 | 4.731587  |
| 65  | 1 | 0 | 0.050100  | -2.463760 | 4.889759  |
| 66  | 6 | 0 | -0.282165 | -0.714348 | 6.710771  |
| 67  | 1 | 0 | 0.577176  | -1.409008 | 6.692993  |
| 68  | 6 | 0 | 0.282165  | 0.714348  | 6.710771  |
| 69  | 1 | 0 | -0.577176 | 1.409008  | 6.692993  |
| 70  | 6 | 0 | 1.109324  | 0.962886  | 7.976675  |
| 71  | 1 | 0 | 1.490625  | 1.989584  | 7.954631  |
| 72  | 1 | 0 | 1.982212  | 0.297577  | 7.952984  |
| 73  | 6 | 0 | 0.286847  | 0.709072  | 9.240650  |
| 74  | 1 | 0 | 0.905449  | 0.873516  | 10.129169 |
| 75  | 1 | 0 | -0.538688 | 1.432150  | 9.289483  |
| 76  | 6 | 0 | -0.286847 | -0.709072 | 9.240650  |
| 77  | 1 | 0 | -0.905449 | -0.873516 | 10.129169 |
| 78  | 1 | 0 | 0.538688  | -1.432150 | 9.289483  |
| 79  | 6 | 0 | -1.109324 | -0.962886 | 7.976675  |
| 80  | 1 | 0 | -1.982212 | -0.297577 | 7.952984  |
| 81  | 1 | 0 | -1.490625 | -1.989584 | 7.954631  |
| 82  | 6 | 0 | 0.823598  | 1.811687  | 4.731587  |
| 83  | 1 | 0 | -0.050100 | 2.463760  | 4.889759  |
| 84  | 6 | 0 | 1.630916  | 2.104601  | 3.531616  |
| 85  | 6 | 0 | 2.744408  | 1.317485  | 3.206034  |
| 86  | 1 | 0 | 2.991553  | 0.476042  | 3.848223  |
| 87  | 6 | 0 | 3.531616  | 1.630916  | 2.104601  |
| 88  | 6 | 0 | 3.206034  | 2.744408  | 1.317485  |
| 89  | 1 | 0 | 3.848223  | 2.991553  | 0.476042  |
| 90  | 6 | 0 | 2.104601  | 3.531616  | 1.630916  |
| 91  | 6 | 0 | 1.317485  | 3.206034  | 2.744408  |
| 92  | 1 | 0 | 0.476042  | 3.848223  | 2.991553  |
| 93  | 6 | 0 | 1.811687  | 4.731587  | 0.823598  |
| 94  | 1 | 0 | 2.463760  | 4.889759  | -0.050100 |
| 95  | 6 | 0 | 0.714348  | 6.710771  | 0.282165  |
| 96  | 1 | 0 | 1.409008  | 6.692993  | -0.577176 |
| 97  | 6 | 0 | -0.714348 | 6.710771  | -0.282165 |
| 98  | 1 | 0 | -1.409008 | 6.692993  | 0.577176  |
| 99  | 6 | 0 | -0.962886 | 7.976675  | -1.109324 |
| 100 | 1 | 0 | -1.989584 | 7.954631  | -1.490625 |
| 101 | 1 | 0 | -0.297577 | 7.952984  | -1.982212 |
| 102 | 6 | 0 | -0.709072 | 9.240650  | -0.286847 |
| 103 | 1 | 0 | -1.432150 | 9.289483  | 0.538688  |
| 104 | 1 | 0 | -0.873516 | 10.129169 | -0.905449 |
| 105 | 6 | 0 | 0.709072  | 9.240650  | 0.286847  |
| 106 | 1 | 0 | 1.432150  | 9.289483  | -0.538688 |
| 107 | 1 | 0 | 0.873516  | 10.129169 | 0.905449  |
| 108 | 6 | 0 | 0.962886  | 7.976675  | 1.109324  |
| 109 | 1 | 0 | 0.297577  | 7.952984  | 1.982212  |
| 110 | 1 | 0 | 1.989584  | 7.954631  | 1.490625  |

|     |    |   |           |            |           |
|-----|----|---|-----------|------------|-----------|
| 111 | 6  | 0 | -1.811687 | 4.731587   | -0.823598 |
| 112 | 1  | 0 | -2.463760 | 4.889759   | 0.050100  |
| 113 | 7  | 0 | -0.887581 | -5.545360  | 1.125960  |
| 114 | 7  | 0 | 0.887581  | -5.545360  | -1.125960 |
| 115 | 7  | 0 | 5.545360  | -1.125960  | -0.887581 |
| 116 | 7  | 0 | 5.545360  | 1.125960   | 0.887581  |
| 117 | 6  | 0 | -1.317485 | -3.206034  | 2.744408  |
| 118 | 1  | 0 | -0.476042 | -3.848223  | 2.991553  |
| 119 | 6  | 0 | -2.104601 | -3.531616  | 1.630916  |
| 120 | 6  | 0 | -1.811687 | -4.731587  | 0.823598  |
| 121 | 1  | 0 | -2.463760 | -4.889759  | -0.050100 |
| 122 | 6  | 0 | -0.714348 | -6.710771  | 0.282165  |
| 123 | 1  | 0 | -1.409008 | -6.692993  | -0.577176 |
| 124 | 6  | 0 | 0.714348  | -6.710771  | -0.282165 |
| 125 | 1  | 0 | 1.409008  | -6.692993  | 0.577176  |
| 126 | 6  | 0 | 0.962886  | -7.976675  | -1.109324 |
| 127 | 1  | 0 | 1.989584  | -7.954631  | -1.490625 |
| 128 | 1  | 0 | 0.297577  | -7.952984  | -1.982212 |
| 129 | 6  | 0 | 0.709072  | -9.240650  | -0.286847 |
| 130 | 1  | 0 | 0.873516  | -10.129169 | -0.905449 |
| 131 | 1  | 0 | 1.432150  | -9.289483  | 0.538688  |
| 132 | 6  | 0 | -0.709072 | -9.240650  | 0.286847  |
| 133 | 1  | 0 | -0.873516 | -10.129169 | 0.905449  |
| 134 | 1  | 0 | -1.432150 | -9.289483  | -0.538688 |
| 135 | 6  | 0 | -0.962886 | -7.976675  | 1.109324  |
| 136 | 1  | 0 | -0.297577 | -7.952984  | 1.982212  |
| 137 | 1  | 0 | -1.989584 | -7.954631  | 1.490625  |
| 138 | 6  | 0 | 1.811687  | -4.731587  | -0.823598 |
| 139 | 1  | 0 | 2.463760  | -4.889759  | 0.050100  |
| 140 | 6  | 0 | 2.104601  | -3.531616  | -1.630916 |
| 141 | 6  | 0 | 1.317485  | -3.206034  | -2.744408 |
| 142 | 1  | 0 | 0.476042  | -3.848223  | -2.991553 |
| 143 | 6  | 0 | 1.630916  | -2.104601  | -3.531616 |
| 144 | 6  | 0 | 2.744408  | -1.317485  | -3.206034 |
| 145 | 1  | 0 | 2.991553  | -0.476042  | -3.848223 |
| 146 | 6  | 0 | 3.531616  | -1.630916  | -2.104601 |
| 147 | 6  | 0 | 3.206034  | -2.744408  | -1.317485 |
| 148 | 1  | 0 | 3.848223  | -2.991553  | -0.476042 |
| 149 | 6  | 0 | 4.731587  | -0.823598  | -1.811687 |
| 150 | 1  | 0 | 4.889759  | 0.050100   | -2.463760 |
| 151 | 6  | 0 | 6.710771  | -0.282165  | -0.714348 |
| 152 | 1  | 0 | 6.692993  | 0.577176   | -1.409008 |
| 153 | 6  | 0 | 6.710771  | 0.282165   | 0.714348  |
| 154 | 1  | 0 | 6.692993  | -0.577176  | 1.409008  |
| 155 | 6  | 0 | 7.976675  | 1.109324   | 0.962886  |
| 156 | 1  | 0 | 7.954631  | 1.490625   | 1.989584  |
| 157 | 1  | 0 | 7.952984  | 1.982212   | 0.297577  |
| 158 | 6  | 0 | 9.240650  | 0.286847   | 0.709072  |
| 159 | 1  | 0 | 9.289483  | -0.538688  | 1.432150  |
| 160 | 1  | 0 | 10.129169 | 0.905449   | 0.873516  |
| 161 | 6  | 0 | 9.240650  | -0.286847  | -0.709072 |
| 162 | 1  | 0 | 9.289483  | 0.538688   | -1.432150 |
| 163 | 1  | 0 | 10.129169 | -0.905449  | -0.873516 |
| 164 | 6  | 0 | 7.976675  | -1.109324  | -0.962886 |
| 165 | 1  | 0 | 7.952984  | -1.982212  | -0.297577 |
| 166 | 1  | 0 | 7.954631  | -1.490625  | -1.989584 |
| 167 | 6  | 0 | 4.731587  | 0.823598   | 1.811687  |
| 168 | 1  | 0 | 4.889759  | -0.050100  | 2.463760  |
| 169 | 54 | 0 | 2.361199  | -2.361199  | 2.361199  |

|     |    |   |           |           |           |
|-----|----|---|-----------|-----------|-----------|
| 170 | 54 | 0 | -2.361199 | 2.361199  | 2.361199  |
| 171 | 54 | 0 | -2.361199 | -2.361199 | -2.361199 |
| 172 | 54 | 0 | 2.361199  | 2.361199  | -2.361199 |
| 173 | 54 | 0 | 0.000000  | 0.000000  | 0.000000  |

-----  
5Xe@CC3 C1 cc3-xexxqq

Standard orientation:

| Center<br>Number | Atomic<br>Number | Atomic<br>Type | Coordinates (Angstroms) |           |           |
|------------------|------------------|----------------|-------------------------|-----------|-----------|
|                  |                  |                | X                       | Y         | Z         |
| 1                | 7                | 0              | -2.906564               | -0.153895 | -4.926692 |
| 2                | 7                | 0              | -3.445488               | 2.452311  | -3.863531 |
| 3                | 7                | 0              | 1.635315                | 5.341718  | -1.194560 |
| 4                | 7                | 0              | 4.076452                | 4.023035  | -0.457960 |
| 5                | 6                | 0              | -0.748182               | -1.790946 | -3.954217 |
| 6                | 1                | 0              | -0.526234               | -1.069860 | -4.736679 |
| 7                | 6                | 0              | -2.050760               | -1.840497 | -3.438177 |
| 8                | 6                | 0              | -3.105489               | -0.950710 | -3.960701 |
| 9                | 1                | 0              | -4.089118               | -1.039421 | -3.472640 |
| 10               | 6                | 0              | -4.027216               | 0.644957  | -5.380754 |
| 11               | 1                | 0              | -4.923135               | 0.473539  | -4.756794 |
| 12               | 6                | 0              | -3.661201               | 2.131916  | -5.260293 |
| 13               | 1                | 0              | -2.745830               | 2.296271  | -5.857273 |
| 14               | 6                | 0              | -4.791160               | 3.007122  | -5.812995 |
| 15               | 1                | 0              | -4.500568               | 4.059458  | -5.722902 |
| 16               | 1                | 0              | -5.676688               | 2.865017  | -5.179952 |
| 17               | 6                | 0              | -5.116550               | 2.649160  | -7.263719 |
| 18               | 1                | 0              | -5.939069               | 3.273554  | -7.628104 |
| 19               | 1                | 0              | -4.246107               | 2.868396  | -7.896997 |
| 20               | 6                | 0              | -5.470278               | 1.166248  | -7.392029 |
| 21               | 1                | 0              | -5.665855               | 0.906624  | -8.437753 |
| 22               | 1                | 0              | -6.396630               | 0.967005  | -6.836194 |
| 23               | 6                | 0              | -4.347292               | 0.289237  | -6.836556 |
| 24               | 1                | 0              | -3.434100               | 0.421400  | -7.431308 |
| 25               | 1                | 0              | -4.612771               | -0.772109 | -6.891736 |
| 26               | 6                | 0              | -2.310443               | 2.911094  | -3.533562 |
| 27               | 1                | 0              | -1.506315               | 3.061015  | -4.271519 |
| 28               | 6                | 0              | -1.988518               | 3.306229  | -2.148732 |
| 29               | 6                | 0              | -2.918366               | 3.124317  | -1.115175 |
| 30               | 1                | 0              | -3.876539               | 2.669018  | -1.351988 |
| 31               | 6                | 0              | -2.629182               | 3.549097  | 0.175788  |
| 32               | 6                | 0              | -1.397170               | 4.163394  | 0.441161  |
| 33               | 1                | 0              | -1.197264               | 4.512722  | 1.450936  |
| 34               | 6                | 0              | -0.468522               | 4.349331  | -0.575596 |
| 35               | 6                | 0              | -0.771461               | 3.917944  | -1.874597 |
| 36               | 1                | 0              | -0.045995               | 4.097433  | -2.663894 |
| 37               | 6                | 0              | 0.796330                | 5.053231  | -0.288654 |
| 38               | 1                | 0              | 0.955610                | 5.336964  | 0.763831  |
| 39               | 6                | 0              | 2.821536                | 6.076897  | -0.803076 |
| 40               | 1                | 0              | 2.858699                | 6.228050  | 0.291037  |
| 41               | 6                | 0              | 4.066493                | 5.268919  | -1.198212 |
| 42               | 1                | 0              | 4.012548                | 5.089573  | -2.287342 |
| 43               | 6                | 0              | 5.340356                | 6.058324  | -0.877297 |
| 44               | 1                | 0              | 6.210226                | 5.463394  | -1.176288 |
| 45               | 1                | 0              | 5.400225                | 6.186727  | 0.211289  |
| 46               | 6                | 0              | 5.342725                | 7.421372  | -1.570387 |
| 47               | 1                | 0              | 5.360205                | 7.276218  | -2.659134 |

|     |   |   |           |           |           |
|-----|---|---|-----------|-----------|-----------|
| 48  | 1 | 0 | 6.252125  | 7.972680  | -1.309157 |
| 49  | 6 | 0 | 4.098636  | 8.226698  | -1.190670 |
| 50  | 1 | 0 | 4.130919  | 8.455359  | -0.116709 |
| 51  | 1 | 0 | 4.085366  | 9.185859  | -1.718882 |
| 52  | 6 | 0 | 2.825010  | 7.440091  | -1.503527 |
| 53  | 1 | 0 | 2.740275  | 7.270862  | -2.584866 |
| 54  | 1 | 0 | 1.933110  | 7.997695  | -1.197562 |
| 55  | 6 | 0 | 4.104322  | 2.944087  | -1.123420 |
| 56  | 1 | 0 | 4.112556  | 2.940002  | -2.225038 |
| 57  | 7 | 0 | -2.914950 | -4.890761 | -0.585775 |
| 58  | 7 | 0 | -2.759614 | -4.486149 | 2.245308  |
| 59  | 7 | 0 | -3.615864 | 1.591880  | 4.144578  |
| 60  | 7 | 0 | -3.477397 | 3.863839  | 2.405730  |
| 61  | 6 | 0 | -2.365353 | -2.778869 | -2.462884 |
| 62  | 1 | 0 | -3.374346 | -2.854825 | -2.065936 |
| 63  | 6 | 0 | -1.391160 | -3.671901 | -1.994680 |
| 64  | 6 | 0 | -1.731769 | -4.712240 | -1.005198 |
| 65  | 1 | 0 | -0.893561 | -5.343497 | -0.669613 |
| 66  | 6 | 0 | -3.138745 | -5.967757 | 0.357657  |
| 67  | 1 | 0 | -2.192446 | -6.472163 | 0.624810  |
| 68  | 6 | 0 | -3.728650 | -5.384369 | 1.650523  |
| 69  | 1 | 0 | -4.658195 | -4.851774 | 1.379133  |
| 70  | 6 | 0 | -4.057305 | -6.505848 | 2.641763  |
| 71  | 1 | 0 | -4.483252 | -6.063428 | 3.548861  |
| 72  | 1 | 0 | -3.117551 | -6.991947 | 2.934459  |
| 73  | 6 | 0 | -5.013023 | -7.530608 | 2.029206  |
| 74  | 1 | 0 | -5.215214 | -8.331007 | 2.748674  |
| 75  | 1 | 0 | -5.975325 | -7.047127 | 1.812430  |
| 76  | 6 | 0 | -4.436773 | -8.105868 | 0.733967  |
| 77  | 1 | 0 | -5.141078 | -8.810494 | 0.279382  |
| 78  | 1 | 0 | -3.524611 | -8.672562 | 0.965416  |
| 79  | 6 | 0 | -4.102202 | -6.989279 | -0.255962 |
| 80  | 1 | 0 | -5.017104 | -6.461881 | -0.555774 |
| 81  | 1 | 0 | -3.654130 | -7.394777 | -1.169629 |
| 82  | 6 | 0 | -3.107483 | -3.280322 | 2.425291  |
| 83  | 1 | 0 | -4.107462 | -2.914453 | 2.142868  |
| 84  | 6 | 0 | -2.216506 | -2.285272 | 3.052385  |
| 85  | 6 | 0 | -0.906057 | -2.624450 | 3.417562  |
| 86  | 1 | 0 | -0.555149 | -3.633057 | 3.214780  |
| 87  | 6 | 0 | -0.089746 | -1.698741 | 4.055865  |
| 88  | 6 | 0 | -0.586308 | -0.417748 | 4.335568  |
| 89  | 1 | 0 | 0.055247  | 0.285838  | 4.859845  |
| 90  | 6 | 0 | -1.884134 | -0.071255 | 3.979668  |
| 91  | 6 | 0 | -2.698468 | -1.013057 | 3.335046  |
| 92  | 1 | 0 | -3.719919 | -0.735145 | 3.088117  |
| 93  | 6 | 0 | -2.407454 | 1.260782  | 4.339114  |
| 94  | 1 | 0 | -1.685332 | 1.945239  | 4.812132  |
| 95  | 6 | 0 | -4.028145 | 2.913482  | 4.572871  |
| 96  | 1 | 0 | -3.178256 | 3.486127  | 4.986508  |
| 97  | 6 | 0 | -4.556258 | 3.690319  | 3.357457  |
| 98  | 1 | 0 | -5.385526 | 3.102546  | 2.923670  |
| 99  | 6 | 0 | -5.080082 | 5.064463  | 3.788255  |
| 100 | 1 | 0 | -5.457278 | 5.592593  | 2.905769  |
| 101 | 1 | 0 | -4.234702 | 5.649303  | 4.173476  |
| 102 | 6 | 0 | -6.165299 | 4.937930  | 4.858282  |
| 103 | 1 | 0 | -7.034899 | 4.416965  | 4.434999  |
| 104 | 1 | 0 | -6.508559 | 5.932157  | 5.162998  |
| 105 | 6 | 0 | -5.649432 | 4.154058  | 6.066595  |
| 106 | 1 | 0 | -4.842209 | 4.723010  | 6.547673  |



|     |   |   |           |           |           |
|-----|---|---|-----------|-----------|-----------|
| 107 | 1 | 0 | -6.441303 | 4.033881  | 6.813374  |
| 108 | 6 | 0 | -5.119920 | 2.784063  | 5.640351  |
| 109 | 1 | 0 | -5.934447 | 2.175156  | 5.226925  |
| 110 | 1 | 0 | -4.714629 | 2.234707  | 6.497030  |
| 111 | 6 | 0 | -3.643668 | 3.401265  | 1.236959  |
| 112 | 1 | 0 | -4.569516 | 2.881616  | 0.943062  |
| 113 | 7 | 0 | 2.470361  | -3.486217 | -3.800772 |
| 114 | 7 | 0 | 4.660398  | -1.955401 | -2.753392 |
| 115 | 7 | 0 | 4.393432  | -0.958845 | 3.593368  |
| 116 | 7 | 0 | 2.018342  | -1.332113 | 5.160408  |
| 117 | 6 | 0 | -0.103110 | -3.613167 | -2.512786 |
| 118 | 1 | 0 | 0.662452  | -4.312420 | -2.186612 |
| 119 | 6 | 0 | 0.225708  | -2.670222 | -3.496724 |
| 120 | 6 | 0 | 1.572921  | -2.641196 | -4.098146 |
| 121 | 1 | 0 | 1.743305  | -1.850169 | -4.845739 |
| 122 | 6 | 0 | 3.741554  | -3.386652 | -4.490234 |
| 123 | 1 | 0 | 3.767712  | -2.508743 | -5.160949 |
| 124 | 6 | 0 | 4.861907  | -3.207290 | -3.455105 |
| 125 | 1 | 0 | 4.815281  | -4.068312 | -2.763907 |
| 126 | 6 | 0 | 6.229821  | -3.185768 | -4.145917 |
| 127 | 1 | 0 | 7.008670  | -3.065813 | -3.384971 |
| 128 | 1 | 0 | 6.274897  | -2.299109 | -4.791639 |
| 129 | 6 | 0 | 6.458919  | -4.452181 | -4.971819 |
| 130 | 1 | 0 | 7.432684  | -4.403134 | -5.470385 |
| 131 | 1 | 0 | 6.487359  | -5.323089 | -4.302904 |
| 132 | 6 | 0 | 5.339461  | -4.642609 | -5.997037 |
| 133 | 1 | 0 | 5.487598  | -5.569895 | -6.560391 |
| 134 | 1 | 0 | 5.372528  | -3.819810 | -6.724132 |
| 135 | 6 | 0 | 3.972160  | -4.659460 | -5.312291 |
| 136 | 1 | 0 | 3.896966  | -5.522478 | -4.638005 |
| 137 | 1 | 0 | 3.165393  | -4.757745 | -6.046783 |
| 138 | 6 | 0 | 4.544913  | -2.000654 | -1.491559 |
| 139 | 1 | 0 | 4.587866  | -2.951635 | -0.936980 |
| 140 | 6 | 0 | 4.369733  | -0.788817 | -0.668413 |
| 141 | 6 | 0 | 4.277379  | 0.477048  | -1.263823 |
| 142 | 1 | 0 | 4.326552  | 0.546512  | -2.347485 |
| 143 | 6 | 0 | 4.153458  | 1.617375  | -0.479619 |
| 144 | 6 | 0 | 4.124380  | 1.495447  | 0.916722  |
| 145 | 1 | 0 | 4.051897  | 2.399708  | 1.515538  |
| 146 | 6 | 0 | 4.215404  | 0.245964  | 1.517522  |
| 147 | 6 | 0 | 4.341205  | -0.897627 | 0.716511  |
| 148 | 1 | 0 | 4.437706  | -1.864781 | 1.203057  |
| 149 | 6 | 0 | 4.226172  | 0.143316  | 2.989347  |
| 150 | 1 | 0 | 4.097539  | 1.091960  | 3.534493  |
| 151 | 6 | 0 | 4.416065  | -0.935072 | 5.042211  |
| 152 | 1 | 0 | 4.219730  | 0.080392  | 5.431614  |
| 153 | 6 | 0 | 3.306168  | -1.853867 | 5.573465  |
| 154 | 1 | 0 | 3.483956  | -2.861982 | 5.157061  |
| 155 | 6 | 0 | 3.355387  | -1.922332 | 7.103819  |
| 156 | 1 | 0 | 2.560818  | -2.590235 | 7.453958  |
| 157 | 1 | 0 | 3.130727  | -0.923523 | 7.500088  |
| 158 | 6 | 0 | 4.724481  | -2.390825 | 7.598586  |
| 159 | 1 | 0 | 4.901814  | -3.420135 | 7.258294  |
| 160 | 1 | 0 | 4.739931  | -2.411566 | 8.693368  |
| 161 | 6 | 0 | 5.835640  | -1.486159 | 7.062620  |
| 162 | 1 | 0 | 5.713097  | -0.477765 | 7.480798  |
| 163 | 1 | 0 | 6.816551  | -1.847720 | 7.388615  |
| 164 | 6 | 0 | 5.786516  | -1.411361 | 5.536017  |
| 165 | 1 | 0 | 5.983428  | -2.400249 | 5.101892  |

|     |    |   |           |           |           |
|-----|----|---|-----------|-----------|-----------|
| 166 | 1  | 0 | 6.556753  | -0.734806 | 5.150032  |
| 167 | 6  | 0 | 1.263693  | -2.097594 | 4.487789  |
| 168 | 1  | 0 | 1.569933  | -3.118887 | 4.210477  |
| 169 | 54 | 0 | 1.690044  | -3.600105 | 0.822643  |
| 170 | 54 | 0 | -4.164027 | -0.349659 | -0.122848 |
| 171 | 54 | 0 | 1.384919  | 1.318948  | -3.556642 |
| 172 | 54 | 0 | 1.093251  | 2.646350  | 2.873653  |
| 173 | 54 | 0 | -0.110126 | -0.017207 | 0.010127  |

Kr@CC3 T cc3-krx

Standard orientation:

| Center<br>Number | Atomic<br>Number | Atomic<br>Type | Coordinates (Angstroms) |           |           |
|------------------|------------------|----------------|-------------------------|-----------|-----------|
|                  |                  |                | X                       | Y         | Z         |
| 1                | 7                | 0              | -1.116843               | -0.902661 | 5.540784  |
| 2                | 7                | 0              | 1.116843                | 0.902661  | 5.540784  |
| 3                | 7                | 0              | 0.902661                | 5.540784  | 1.116843  |
| 4                | 7                | 0              | -0.902661               | 5.540784  | -1.116843 |
| 5                | 6                | 0              | -2.704301               | -1.283430 | 3.174928  |
| 6                | 1                | 0              | -2.938042               | -0.434762 | 3.812605  |
| 7                | 6                | 0              | -1.594389               | -2.077187 | 3.497433  |
| 8                | 6                | 0              | -0.783241               | -1.787359 | 4.696277  |
| 9                | 1                | 0              | 0.119431                | -2.404880 | 4.823887  |
| 10               | 6                | 0              | -0.268765               | -0.720182 | 6.701724  |
| 11               | 1                | 0              | 0.603985                | -1.397624 | 6.676907  |
| 12               | 6                | 0              | 0.268765                | 0.720182  | 6.701724  |
| 13               | 1                | 0              | -0.603985               | 1.397624  | 6.676907  |
| 14               | 6                | 0              | 1.086050                | 0.988685  | 7.969732  |
| 15               | 1                | 0              | 1.444239                | 2.023640  | 7.947429  |
| 16               | 1                | 0              | 1.973950                | 0.343510  | 7.947977  |
| 17               | 6                | 0              | 0.268628                | 0.716161  | 9.232905  |
| 18               | 1                | 0              | 0.881792                | 0.897422  | 10.121954 |
| 19               | 1                | 0              | -0.575265               | 1.417923  | 9.280027  |
| 20               | 6                | 0              | -0.268628               | -0.716161 | 9.232905  |
| 21               | 1                | 0              | -0.881792               | -0.897422 | 10.121954 |
| 22               | 1                | 0              | 0.575265                | -1.417923 | 9.280027  |
| 23               | 6                | 0              | -1.086050               | -0.988685 | 7.969732  |
| 24               | 1                | 0              | -1.973950               | -0.343510 | 7.947977  |
| 25               | 1                | 0              | -1.444239               | -2.023640 | 7.947429  |
| 26               | 6                | 0              | 0.783241                | 1.787359  | 4.696277  |
| 27               | 1                | 0              | -0.119431               | 2.404880  | 4.823887  |
| 28               | 6                | 0              | 1.594389                | 2.077187  | 3.497433  |
| 29               | 6                | 0              | 2.704301                | 1.283430  | 3.174928  |
| 30               | 1                | 0              | 2.938042                | 0.434762  | 3.812605  |
| 31               | 6                | 0              | 3.497433                | 1.594389  | 2.077187  |
| 32               | 6                | 0              | 3.174928                | 2.704301  | 1.283430  |
| 33               | 1                | 0              | 3.812605                | 2.938042  | 0.434762  |
| 34               | 6                | 0              | 2.077187                | 3.497433  | 1.594389  |
| 35               | 6                | 0              | 1.283430                | 3.174928  | 2.704301  |
| 36               | 1                | 0              | 0.434762                | 3.812605  | 2.938042  |
| 37               | 6                | 0              | 1.787359                | 4.696277  | 0.783241  |
| 38               | 1                | 0              | 2.404880                | 4.823887  | -0.119431 |
| 39               | 6                | 0              | 0.720182                | 6.701724  | 0.268765  |
| 40               | 1                | 0              | 1.397624                | 6.676907  | -0.603985 |
| 41               | 6                | 0              | -0.720182               | 6.701724  | -0.268765 |
| 42               | 1                | 0              | -1.397624               | 6.676907  | 0.603985  |
| 43               | 6                | 0              | -0.988685               | 7.969732  | -1.086050 |

|     |   |   |           |            |           |
|-----|---|---|-----------|------------|-----------|
| 44  | 1 | 0 | -2.023640 | 7.947429   | -1.444239 |
| 45  | 1 | 0 | -0.343510 | 7.947977   | -1.973950 |
| 46  | 6 | 0 | -0.716161 | 9.232905   | -0.268628 |
| 47  | 1 | 0 | -1.417923 | 9.280027   | 0.575265  |
| 48  | 1 | 0 | -0.897422 | 10.121954  | -0.881792 |
| 49  | 6 | 0 | 0.716161  | 9.232905   | 0.268628  |
| 50  | 1 | 0 | 1.417923  | 9.280027   | -0.575265 |
| 51  | 1 | 0 | 0.897422  | 10.121954  | 0.881792  |
| 52  | 6 | 0 | 0.988685  | 7.969732   | 1.086050  |
| 53  | 1 | 0 | 0.343510  | 7.947977   | 1.973950  |
| 54  | 1 | 0 | 2.023640  | 7.947429   | 1.444239  |
| 55  | 6 | 0 | -1.787359 | 4.696277   | -0.783241 |
| 56  | 1 | 0 | -2.404880 | 4.823887   | 0.119431  |
| 57  | 7 | 0 | -0.902661 | -5.540784  | 1.116843  |
| 58  | 7 | 0 | 0.902661  | -5.540784  | -1.116843 |
| 59  | 7 | 0 | 5.540784  | -1.116843  | -0.902661 |
| 60  | 7 | 0 | 5.540784  | 1.116843   | 0.902661  |
| 61  | 6 | 0 | -1.283430 | -3.174928  | 2.704301  |
| 62  | 1 | 0 | -0.434762 | -3.812605  | 2.938042  |
| 63  | 6 | 0 | -2.077187 | -3.497433  | 1.594389  |
| 64  | 6 | 0 | -1.787359 | -4.696277  | 0.783241  |
| 65  | 1 | 0 | -2.404880 | -4.823887  | -0.119431 |
| 66  | 6 | 0 | -0.720182 | -6.701724  | 0.268765  |
| 67  | 1 | 0 | -1.397624 | -6.676907  | -0.603985 |
| 68  | 6 | 0 | 0.720182  | -6.701724  | -0.268765 |
| 69  | 1 | 0 | 1.397624  | -6.676907  | 0.603985  |
| 70  | 6 | 0 | 0.988685  | -7.969732  | -1.086050 |
| 71  | 1 | 0 | 2.023640  | -7.947429  | -1.444239 |
| 72  | 1 | 0 | 0.343510  | -7.947977  | -1.973950 |
| 73  | 6 | 0 | 0.716161  | -9.232905  | -0.268628 |
| 74  | 1 | 0 | 0.897422  | -10.121954 | -0.881792 |
| 75  | 1 | 0 | 1.417923  | -9.280027  | 0.575265  |
| 76  | 6 | 0 | -0.716161 | -9.232905  | 0.268628  |
| 77  | 1 | 0 | -0.897422 | -10.121954 | 0.881792  |
| 78  | 1 | 0 | -1.417923 | -9.280027  | -0.575265 |
| 79  | 6 | 0 | -0.988685 | -7.969732  | 1.086050  |
| 80  | 1 | 0 | -0.343510 | -7.947977  | 1.973950  |
| 81  | 1 | 0 | -2.023640 | -7.947429  | 1.444239  |
| 82  | 6 | 0 | 1.787359  | -4.696277  | -0.783241 |
| 83  | 1 | 0 | 2.404880  | -4.823887  | 0.119431  |
| 84  | 6 | 0 | 2.077187  | -3.497433  | -1.594389 |
| 85  | 6 | 0 | 1.283430  | -3.174928  | -2.704301 |
| 86  | 1 | 0 | 0.434762  | -3.812605  | -2.938042 |
| 87  | 6 | 0 | 1.594389  | -2.077187  | -3.497433 |
| 88  | 6 | 0 | 2.704301  | -1.283430  | -3.174928 |
| 89  | 1 | 0 | 2.938042  | -0.434762  | -3.812605 |
| 90  | 6 | 0 | 3.497433  | -1.594389  | -2.077187 |
| 91  | 6 | 0 | 3.174928  | -2.704301  | -1.283430 |
| 92  | 1 | 0 | 3.812605  | -2.938042  | -0.434762 |
| 93  | 6 | 0 | 4.696277  | -0.783241  | -1.787359 |
| 94  | 1 | 0 | 4.823887  | 0.119431   | -2.404880 |
| 95  | 6 | 0 | 6.701724  | -0.268765  | -0.720182 |
| 96  | 1 | 0 | 6.676907  | 0.603985   | -1.397624 |
| 97  | 6 | 0 | 6.701724  | 0.268765   | 0.720182  |
| 98  | 1 | 0 | 6.676907  | -0.603985  | 1.397624  |
| 99  | 6 | 0 | 7.969732  | 1.086050   | 0.988685  |
| 100 | 1 | 0 | 7.947429  | 1.444239   | 2.023640  |
| 101 | 1 | 0 | 7.947977  | 1.973950   | 0.343510  |
| 102 | 6 | 0 | 9.232905  | 0.268628   | 0.716161  |

|     |   |   |            |           |            |
|-----|---|---|------------|-----------|------------|
| 103 | 1 | 0 | 9.280027   | -0.575265 | 1.417923   |
| 104 | 1 | 0 | 10.121954  | 0.881792  | 0.897422   |
| 105 | 6 | 0 | 9.232905   | -0.268628 | -0.716161  |
| 106 | 1 | 0 | 9.280027   | 0.575265  | -1.417923  |
| 107 | 1 | 0 | 10.121954  | -0.881792 | -0.897422  |
| 108 | 6 | 0 | 7.969732   | -1.086050 | -0.988685  |
| 109 | 1 | 0 | 7.947977   | -1.973950 | -0.343510  |
| 110 | 1 | 0 | 7.947429   | -1.444239 | -2.023640  |
| 111 | 6 | 0 | 4.696277   | 0.783241  | 1.787359   |
| 112 | 1 | 0 | 4.823887   | -0.119431 | 2.404880   |
| 113 | 7 | 0 | -5.540784  | -1.116843 | 0.902661   |
| 114 | 7 | 0 | -5.540784  | 1.116843  | -0.902661  |
| 115 | 7 | 0 | -1.116843  | 0.902661  | -5.540784  |
| 116 | 7 | 0 | 1.116843   | -0.902661 | -5.540784  |
| 117 | 6 | 0 | -3.174928  | -2.704301 | 1.283430   |
| 118 | 1 | 0 | -3.812605  | -2.938042 | 0.434762   |
| 119 | 6 | 0 | -3.497433  | -1.594389 | 2.077187   |
| 120 | 6 | 0 | -4.696277  | -0.783241 | 1.787359   |
| 121 | 1 | 0 | -4.823887  | 0.119431  | 2.404880   |
| 122 | 6 | 0 | -6.701724  | -0.268765 | 0.720182   |
| 123 | 1 | 0 | -6.676907  | 0.603985  | 1.397624   |
| 124 | 6 | 0 | -6.701724  | 0.268765  | -0.720182  |
| 125 | 1 | 0 | -6.676907  | -0.603985 | -1.397624  |
| 126 | 6 | 0 | -7.969732  | 1.086050  | -0.988685  |
| 127 | 1 | 0 | -7.947429  | 1.444239  | -2.023640  |
| 128 | 1 | 0 | -7.947977  | 1.973950  | -0.343510  |
| 129 | 6 | 0 | -9.232905  | 0.268628  | -0.716161  |
| 130 | 1 | 0 | -10.121954 | 0.881792  | -0.897422  |
| 131 | 1 | 0 | -9.280027  | -0.575265 | -1.417923  |
| 132 | 6 | 0 | -9.232905  | -0.268628 | 0.716161   |
| 133 | 1 | 0 | -10.121954 | -0.881792 | 0.897422   |
| 134 | 1 | 0 | -9.280027  | 0.575265  | 1.417923   |
| 135 | 6 | 0 | -7.969732  | -1.086050 | 0.988685   |
| 136 | 1 | 0 | -7.947977  | -1.973950 | 0.343510   |
| 137 | 1 | 0 | -7.947429  | -1.444239 | 2.023640   |
| 138 | 6 | 0 | -4.696277  | 0.783241  | -1.787359  |
| 139 | 1 | 0 | -4.823887  | -0.119431 | -2.404880  |
| 140 | 6 | 0 | -3.497433  | 1.594389  | -2.077187  |
| 141 | 6 | 0 | -3.174928  | 2.704301  | -1.283430  |
| 142 | 1 | 0 | -3.812605  | 2.938042  | -0.434762  |
| 143 | 6 | 0 | -2.077187  | 3.497433  | -1.594389  |
| 144 | 6 | 0 | -1.283430  | 3.174928  | -2.704301  |
| 145 | 1 | 0 | -0.434762  | 3.812605  | -2.938042  |
| 146 | 6 | 0 | -1.594389  | 2.077187  | -3.497433  |
| 147 | 6 | 0 | -2.704301  | 1.283430  | -3.174928  |
| 148 | 1 | 0 | -2.938042  | 0.434762  | -3.812605  |
| 149 | 6 | 0 | -0.783241  | 1.787359  | -4.696277  |
| 150 | 1 | 0 | 0.119431   | 2.404880  | -4.823887  |
| 151 | 6 | 0 | -0.268765  | 0.720182  | -6.701724  |
| 152 | 1 | 0 | 0.603985   | 1.397624  | -6.676907  |
| 153 | 6 | 0 | 0.268765   | -0.720182 | -6.701724  |
| 154 | 1 | 0 | -0.603985  | -1.397624 | -6.676907  |
| 155 | 6 | 0 | 1.086050   | -0.988685 | -7.969732  |
| 156 | 1 | 0 | 1.444239   | -2.023640 | -7.947429  |
| 157 | 1 | 0 | 1.973950   | -0.343510 | -7.947977  |
| 158 | 6 | 0 | 0.268628   | -0.716161 | -9.232905  |
| 159 | 1 | 0 | -0.575265  | -1.417923 | -9.280027  |
| 160 | 1 | 0 | 0.881792   | -0.897422 | -10.121954 |
| 161 | 6 | 0 | -0.268628  | 0.716161  | -9.232905  |

|     |    |   |           |           |            |
|-----|----|---|-----------|-----------|------------|
| 162 | 1  | 0 | 0.575265  | 1.417923  | -9.280027  |
| 163 | 1  | 0 | -0.881792 | 0.897422  | -10.121954 |
| 164 | 6  | 0 | -1.086050 | 0.988685  | -7.969732  |
| 165 | 1  | 0 | -1.973950 | 0.343510  | -7.947977  |
| 166 | 1  | 0 | -1.444239 | 2.023640  | -7.947429  |
| 167 | 6  | 0 | 0.783241  | -1.787359 | -4.696277  |
| 168 | 1  | 0 | -0.119431 | -2.404880 | -4.823887  |
| 169 | 36 | 0 | 0.000000  | 0.000000  | 0.000000   |

-----  
4Kr@CC3 T cc3-re

Standard orientation:

| Center<br>Number | Atomic<br>Number | Atomic<br>Type | Coordinates (Angstroms) |           |           |
|------------------|------------------|----------------|-------------------------|-----------|-----------|
|                  |                  |                | X                       | Y         | Z         |
| 1                | 7                | 0              | -5.552021               | -1.121895 | 0.907504  |
| 2                | 7                | 0              | -5.552021               | 1.121895  | -0.907504 |
| 3                | 7                | 0              | -1.121895               | 0.907504  | -5.552021 |
| 4                | 7                | 0              | 1.121895                | -0.907504 | -5.552021 |
| 5                | 6                | 0              | -3.220987               | -2.749537 | 1.329663  |
| 6                | 1                | 0              | -3.854025               | -2.978832 | 0.475843  |
| 7                | 6                | 0              | -3.541080               | -1.637823 | 2.121013  |
| 8                | 6                | 0              | -4.724328               | -0.809786 | 1.815679  |
| 9                | 1                | 0              | -4.854766               | 0.086589  | 2.442253  |
| 10               | 6                | 0              | -6.707247               | -0.266764 | 0.720455  |
| 11               | 1                | 0              | -6.678850               | 0.607059  | 1.396272  |
| 12               | 6                | 0              | -6.707247               | 0.266764  | -0.720455 |
| 13               | 1                | 0              | -6.678850               | -0.607059 | -1.396272 |
| 14               | 6                | 0              | -7.977280               | 1.080641  | -0.993292 |
| 15               | 1                | 0              | -7.954299               | 1.433878  | -2.029955 |
| 16               | 1                | 0              | -7.956745               | 1.971743  | -0.352487 |
| 17               | 6                | 0              | -9.240189               | 0.264246  | -0.717693 |
| 18               | 1                | 0              | -10.129245              | 0.876183  | -0.903012 |
| 19               | 1                | 0              | -9.286489               | -0.583767 | -1.414499 |
| 20               | 6                | 0              | -9.240189               | -0.264246 | 0.717693  |
| 21               | 1                | 0              | -10.129245              | -0.876183 | 0.903012  |
| 22               | 1                | 0              | -9.286489               | 0.583767  | 1.414499  |
| 23               | 6                | 0              | -7.977280               | -1.080641 | 0.993292  |
| 24               | 1                | 0              | -7.956745               | -1.971743 | 0.352487  |
| 25               | 1                | 0              | -7.954299               | -1.433878 | 2.029955  |
| 26               | 6                | 0              | -4.724328               | 0.809786  | -1.815679 |
| 27               | 1                | 0              | -4.854766               | -0.086589 | -2.442253 |
| 28               | 6                | 0              | -3.541080               | 1.637823  | -2.121013 |
| 29               | 6                | 0              | -3.220987               | 2.749537  | -1.329663 |
| 30               | 1                | 0              | -3.854025               | 2.978832  | -0.475843 |
| 31               | 6                | 0              | -2.121013               | 3.541080  | -1.637823 |
| 32               | 6                | 0              | -1.329663               | 3.220987  | -2.749537 |
| 33               | 1                | 0              | -0.475843               | 3.854025  | -2.978832 |
| 34               | 6                | 0              | -1.637823               | 2.121013  | -3.541080 |
| 35               | 6                | 0              | -2.749537               | 1.329663  | -3.220987 |
| 36               | 1                | 0              | -2.978832               | 0.475843  | -3.854025 |
| 37               | 6                | 0              | -0.809786               | 1.815679  | -4.724328 |
| 38               | 1                | 0              | 0.086589                | 2.442253  | -4.854766 |
| 39               | 6                | 0              | -0.266764               | 0.720455  | -6.707247 |
| 40               | 1                | 0              | 0.607059                | 1.396272  | -6.678850 |
| 41               | 6                | 0              | 0.266764                | -0.720455 | -6.707247 |
| 42               | 1                | 0              | -0.607059               | -1.396272 | -6.678850 |
| 43               | 6                | 0              | 1.080641                | -0.993292 | -7.977280 |

|     |   |   |           |           |            |
|-----|---|---|-----------|-----------|------------|
| 44  | 1 | 0 | 1.433878  | -2.029955 | -7.954299  |
| 45  | 1 | 0 | 1.971743  | -0.352487 | -7.956745  |
| 46  | 6 | 0 | 0.264246  | -0.717693 | -9.240189  |
| 47  | 1 | 0 | -0.583767 | -1.414499 | -9.286489  |
| 48  | 1 | 0 | 0.876183  | -0.903012 | -10.129245 |
| 49  | 6 | 0 | -0.264246 | 0.717693  | -9.240189  |
| 50  | 1 | 0 | 0.583767  | 1.414499  | -9.286489  |
| 51  | 1 | 0 | -0.876183 | 0.903012  | -10.129245 |
| 52  | 6 | 0 | -1.080641 | 0.993292  | -7.977280  |
| 53  | 1 | 0 | -1.971743 | 0.352487  | -7.956745  |
| 54  | 1 | 0 | -1.433878 | 2.029955  | -7.954299  |
| 55  | 6 | 0 | 0.809786  | -1.815679 | -4.724328  |
| 56  | 1 | 0 | -0.086589 | -2.442253 | -4.854766  |
| 57  | 7 | 0 | -1.121895 | -0.907504 | 5.552021   |
| 58  | 7 | 0 | 1.121895  | 0.907504  | 5.552021   |
| 59  | 7 | 0 | 0.907504  | 5.552021  | 1.121895   |
| 60  | 7 | 0 | -0.907504 | 5.552021  | -1.121895  |
| 61  | 6 | 0 | -2.749537 | -1.329663 | 3.220987   |
| 62  | 1 | 0 | -2.978832 | -0.475843 | 3.854025   |
| 63  | 6 | 0 | -1.637823 | -2.121013 | 3.541080   |
| 64  | 6 | 0 | -0.809786 | -1.815679 | 4.724328   |
| 65  | 1 | 0 | 0.086589  | -2.442253 | 4.854766   |
| 66  | 6 | 0 | -0.266764 | -0.720455 | 6.707247   |
| 67  | 1 | 0 | 0.607059  | -1.396272 | 6.678850   |
| 68  | 6 | 0 | 0.266764  | 0.720455  | 6.707247   |
| 69  | 1 | 0 | -0.607059 | 1.396272  | 6.678850   |
| 70  | 6 | 0 | 1.080641  | 0.993292  | 7.977280   |
| 71  | 1 | 0 | 1.433878  | 2.029955  | 7.954299   |
| 72  | 1 | 0 | 1.971743  | 0.352487  | 7.956745   |
| 73  | 6 | 0 | 0.264246  | 0.717693  | 9.240189   |
| 74  | 1 | 0 | 0.876183  | 0.903012  | 10.129245  |
| 75  | 1 | 0 | -0.583767 | 1.414499  | 9.286489   |
| 76  | 6 | 0 | -0.264246 | -0.717693 | 9.240189   |
| 77  | 1 | 0 | -0.876183 | -0.903012 | 10.129245  |
| 78  | 1 | 0 | 0.583767  | -1.414499 | 9.286489   |
| 79  | 6 | 0 | -1.080641 | -0.993292 | 7.977280   |
| 80  | 1 | 0 | -1.971743 | -0.352487 | 7.956745   |
| 81  | 1 | 0 | -1.433878 | -2.029955 | 7.954299   |
| 82  | 6 | 0 | 0.809786  | 1.815679  | 4.724328   |
| 83  | 1 | 0 | -0.086589 | 2.442253  | 4.854766   |
| 84  | 6 | 0 | 1.637823  | 2.121013  | 3.541080   |
| 85  | 6 | 0 | 2.749537  | 1.329663  | 3.220987   |
| 86  | 1 | 0 | 2.978832  | 0.475843  | 3.854025   |
| 87  | 6 | 0 | 3.541080  | 1.637823  | 2.121013   |
| 88  | 6 | 0 | 3.220987  | 2.749537  | 1.329663   |
| 89  | 1 | 0 | 3.854025  | 2.978832  | 0.475843   |
| 90  | 6 | 0 | 2.121013  | 3.541080  | 1.637823   |
| 91  | 6 | 0 | 1.329663  | 3.220987  | 2.749537   |
| 92  | 1 | 0 | 0.475843  | 3.854025  | 2.978832   |
| 93  | 6 | 0 | 1.815679  | 4.724328  | 0.809786   |
| 94  | 1 | 0 | 2.442253  | 4.854766  | -0.086589  |
| 95  | 6 | 0 | 0.720455  | 6.707247  | 0.266764   |
| 96  | 1 | 0 | 1.396272  | 6.678850  | -0.607059  |
| 97  | 6 | 0 | -0.720455 | 6.707247  | -0.266764  |
| 98  | 1 | 0 | -1.396272 | 6.678850  | 0.607059   |
| 99  | 6 | 0 | -0.993292 | 7.977280  | -1.080641  |
| 100 | 1 | 0 | -2.029955 | 7.954299  | -1.433878  |
| 101 | 1 | 0 | -0.352487 | 7.956745  | -1.971743  |
| 102 | 6 | 0 | -0.717693 | 9.240189  | -0.264246  |

|     |   |   |           |            |           |
|-----|---|---|-----------|------------|-----------|
| 103 | 1 | 0 | -1.414499 | 9.286489   | 0.583767  |
| 104 | 1 | 0 | -0.903012 | 10.129245  | -0.876183 |
| 105 | 6 | 0 | 0.717693  | 9.240189   | 0.264246  |
| 106 | 1 | 0 | 1.414499  | 9.286489   | -0.583767 |
| 107 | 1 | 0 | 0.903012  | 10.129245  | 0.876183  |
| 108 | 6 | 0 | 0.993292  | 7.977280   | 1.080641  |
| 109 | 1 | 0 | 0.352487  | 7.956745   | 1.971743  |
| 110 | 1 | 0 | 2.029955  | 7.954299   | 1.433878  |
| 111 | 6 | 0 | -1.815679 | 4.724328   | -0.809786 |
| 112 | 1 | 0 | -2.442253 | 4.854766   | 0.086589  |
| 113 | 7 | 0 | -0.907504 | -5.552021  | 1.121895  |
| 114 | 7 | 0 | 0.907504  | -5.552021  | -1.121895 |
| 115 | 7 | 0 | 5.552021  | -1.121895  | -0.907504 |
| 116 | 7 | 0 | 5.552021  | 1.121895   | 0.907504  |
| 117 | 6 | 0 | -1.329663 | -3.220987  | 2.749537  |
| 118 | 1 | 0 | -0.475843 | -3.854025  | 2.978832  |
| 119 | 6 | 0 | -2.121013 | -3.541080  | 1.637823  |
| 120 | 6 | 0 | -1.815679 | -4.724328  | 0.809786  |
| 121 | 1 | 0 | -2.442253 | -4.854766  | -0.086589 |
| 122 | 6 | 0 | -0.720455 | -6.707247  | 0.266764  |
| 123 | 1 | 0 | -1.396272 | -6.678850  | -0.607059 |
| 124 | 6 | 0 | 0.720455  | -6.707247  | -0.266764 |
| 125 | 1 | 0 | 1.396272  | -6.678850  | 0.607059  |
| 126 | 6 | 0 | 0.993292  | -7.977280  | -1.080641 |
| 127 | 1 | 0 | 2.029955  | -7.954299  | -1.433878 |
| 128 | 1 | 0 | 0.352487  | -7.956745  | -1.971743 |
| 129 | 6 | 0 | 0.717693  | -9.240189  | -0.264246 |
| 130 | 1 | 0 | 0.903012  | -10.129245 | -0.876183 |
| 131 | 1 | 0 | 1.414499  | -9.286489  | 0.583767  |
| 132 | 6 | 0 | -0.717693 | -9.240189  | 0.264246  |
| 133 | 1 | 0 | -0.903012 | -10.129245 | 0.876183  |
| 134 | 1 | 0 | -1.414499 | -9.286489  | -0.583767 |
| 135 | 6 | 0 | -0.993292 | -7.977280  | 1.080641  |
| 136 | 1 | 0 | -0.352487 | -7.956745  | 1.971743  |
| 137 | 1 | 0 | -2.029955 | -7.954299  | 1.433878  |
| 138 | 6 | 0 | 1.815679  | -4.724328  | -0.809786 |
| 139 | 1 | 0 | 2.442253  | -4.854766  | 0.086589  |
| 140 | 6 | 0 | 2.121013  | -3.541080  | -1.637823 |
| 141 | 6 | 0 | 1.329663  | -3.220987  | -2.749537 |
| 142 | 1 | 0 | 0.475843  | -3.854025  | -2.978832 |
| 143 | 6 | 0 | 1.637823  | -2.121013  | -3.541080 |
| 144 | 6 | 0 | 2.749537  | -1.329663  | -3.220987 |
| 145 | 1 | 0 | 2.978832  | -0.475843  | -3.854025 |
| 146 | 6 | 0 | 3.541080  | -1.637823  | -2.121013 |
| 147 | 6 | 0 | 3.220987  | -2.749537  | -1.329663 |
| 148 | 1 | 0 | 3.854025  | -2.978832  | -0.475843 |
| 149 | 6 | 0 | 4.724328  | -0.809786  | -1.815679 |
| 150 | 1 | 0 | 4.854766  | 0.086589   | -2.442253 |
| 151 | 6 | 0 | 6.707247  | -0.266764  | -0.720455 |
| 152 | 1 | 0 | 6.678850  | 0.607059   | -1.396272 |
| 153 | 6 | 0 | 6.707247  | 0.266764   | 0.720455  |
| 154 | 1 | 0 | 6.678850  | -0.607059  | 1.396272  |
| 155 | 6 | 0 | 7.977280  | 1.080641   | 0.993292  |
| 156 | 1 | 0 | 7.954299  | 1.433878   | 2.029955  |
| 157 | 1 | 0 | 7.956745  | 1.971743   | 0.352487  |
| 158 | 6 | 0 | 9.240189  | 0.264246   | 0.717693  |
| 159 | 1 | 0 | 9.286489  | -0.583767  | 1.414499  |
| 160 | 1 | 0 | 10.129245 | 0.876183   | 0.903012  |
| 161 | 6 | 0 | 9.240189  | -0.264246  | -0.717693 |

|     |    |   |           |           |           |
|-----|----|---|-----------|-----------|-----------|
| 162 | 1  | 0 | 9.286489  | 0.583767  | -1.414499 |
| 163 | 1  | 0 | 10.129245 | -0.876183 | -0.903012 |
| 164 | 6  | 0 | 7.977280  | -1.080641 | -0.993292 |
| 165 | 1  | 0 | 7.956745  | -1.971743 | -0.352487 |
| 166 | 1  | 0 | 7.954299  | -1.433878 | -2.029955 |
| 167 | 6  | 0 | 4.724328  | 0.809786  | 1.815679  |
| 168 | 1  | 0 | 4.854766  | -0.086589 | 2.442253  |
| 169 | 36 | 0 | 1.370921  | -1.370921 | 1.370921  |
| 170 | 36 | 0 | -1.370921 | 1.370921  | 1.370921  |
| 171 | 36 | 0 | -1.370921 | -1.370921 | -1.370921 |
| 172 | 36 | 0 | 1.370921  | 1.370921  | -1.370921 |

5Kr@CC3 T cc3-krxx

Standard orientation:

| Center<br>Number | Atomic<br>Number | Atomic<br>Type | Coordinates (Angstroms) |           |           |
|------------------|------------------|----------------|-------------------------|-----------|-----------|
|                  |                  |                | X                       | Y         | Z         |
| 1                | 7                | 0              | -5.538193               | -1.115241 | 0.900606  |
| 2                | 7                | 0              | -5.538193               | 1.115241  | -0.900606 |
| 3                | 7                | 0              | -1.115241               | 0.900606  | -5.538193 |
| 4                | 7                | 0              | 1.115241                | -0.900606 | -5.538193 |
| 5                | 6                | 0              | -3.180877               | -2.708553 | 1.288972  |
| 6                | 1                | 0              | -3.824650               | -2.947506 | 0.446140  |
| 7                | 6                | 0              | -3.500947               | -1.597170 | 2.081993  |
| 8                | 6                | 0              | -4.700279               | -0.786675 | 1.793400  |
| 9                | 1                | 0              | -4.834650               | 0.109315  | 2.419890  |
| 10               | 6                | 0              | -6.700761               | -0.269452 | 0.719655  |
| 11               | 1                | 0              | -6.676912               | 0.602358  | 1.398290  |
| 12               | 6                | 0              | -6.700761               | 0.269452  | -0.719655 |
| 13               | 1                | 0              | -6.676912               | -0.602358 | -1.398290 |
| 14               | 6                | 0              | -7.968002               | 1.088538  | -0.986469 |
| 15               | 1                | 0              | -7.945817               | 1.448555  | -2.020801 |
| 16               | 1                | 0              | -7.945852               | 1.975139  | -0.339535 |
| 17               | 6                | 0              | -9.231223               | 0.270582  | -0.715484 |
| 18               | 1                | 0              | -10.120280              | 0.884285  | -0.894775 |
| 19               | 1                | 0              | -9.278623               | -0.571449 | -1.419428 |
| 20               | 6                | 0              | -9.231223               | -0.270582 | 0.715484  |
| 21               | 1                | 0              | -10.120280              | -0.884285 | 0.894775  |
| 22               | 1                | 0              | -9.278623               | 0.571449  | 1.419428  |
| 23               | 6                | 0              | -7.968002               | -1.088538 | 0.986469  |
| 24               | 1                | 0              | -7.945852               | -1.975139 | 0.339535  |
| 25               | 1                | 0              | -7.945817               | -1.448555 | -2.020801 |
| 26               | 6                | 0              | -4.700279               | 0.786675  | -1.793400 |
| 27               | 1                | 0              | -4.834650               | -0.109315 | -2.419890 |
| 28               | 6                | 0              | -3.500947               | 1.597170  | -2.081993 |
| 29               | 6                | 0              | -3.180877               | 2.708553  | -1.288972 |
| 30               | 1                | 0              | -3.824650               | 2.947506  | -0.446140 |
| 31               | 6                | 0              | -2.081993               | 3.500947  | -1.597170 |
| 32               | 6                | 0              | -1.288972               | 3.180877  | -2.708553 |
| 33               | 1                | 0              | -0.446140               | 3.824650  | -2.947506 |
| 34               | 6                | 0              | -1.597170               | 2.081993  | -3.500947 |
| 35               | 6                | 0              | -2.708553               | 1.288972  | -3.180877 |
| 36               | 1                | 0              | -2.947506               | 0.446140  | -3.824650 |
| 37               | 6                | 0              | -0.786675               | 1.793400  | -4.700279 |
| 38               | 1                | 0              | 0.109315                | 2.419890  | -4.834650 |
| 39               | 6                | 0              | -0.269452               | 0.719655  | -6.700761 |
| 40               | 1                | 0              | 0.602358                | 1.398290  | -6.676912 |



|    |   |   |           |           |            |
|----|---|---|-----------|-----------|------------|
| 41 | 6 | 0 | 0.269452  | -0.719655 | -6.700761  |
| 42 | 1 | 0 | -0.602358 | -1.398290 | -6.676912  |
| 43 | 6 | 0 | 1.088538  | -0.986469 | -7.968002  |
| 44 | 1 | 0 | 1.448555  | -2.020801 | -7.945817  |
| 45 | 1 | 0 | 1.975139  | -0.339535 | -7.945852  |
| 46 | 6 | 0 | 0.270582  | -0.715484 | -9.231223  |
| 47 | 1 | 0 | -0.571449 | -1.419428 | -9.278623  |
| 48 | 1 | 0 | 0.884285  | -0.894775 | -10.120280 |
| 49 | 6 | 0 | -0.270582 | 0.715484  | -9.231223  |
| 50 | 1 | 0 | 0.571449  | 1.419428  | -9.278623  |
| 51 | 1 | 0 | -0.884285 | 0.894775  | -10.120280 |
| 52 | 6 | 0 | -1.088538 | 0.986469  | -7.968002  |
| 53 | 1 | 0 | -1.975139 | 0.339535  | -7.945852  |
| 54 | 1 | 0 | -1.448555 | 2.020801  | -7.945817  |
| 55 | 6 | 0 | 0.786675  | -1.793400 | -4.700279  |
| 56 | 1 | 0 | -0.109315 | -2.419890 | -4.834650  |
| 57 | 7 | 0 | -1.115241 | -0.900606 | 5.538193   |
| 58 | 7 | 0 | 1.115241  | 0.900606  | 5.538193   |
| 59 | 7 | 0 | 0.900606  | 5.538193  | 1.115241   |
| 60 | 7 | 0 | -0.900606 | 5.538193  | -1.115241  |
| 61 | 6 | 0 | -2.708553 | -1.288972 | 3.180877   |
| 62 | 1 | 0 | -2.947506 | -0.446140 | 3.824650   |
| 63 | 6 | 0 | -1.597170 | -2.081993 | 3.500947   |
| 64 | 6 | 0 | -0.786675 | -1.793400 | 4.700279   |
| 65 | 1 | 0 | 0.109315  | -2.419890 | 4.834650   |
| 66 | 6 | 0 | -0.269452 | -0.719655 | 6.700761   |
| 67 | 1 | 0 | 0.602358  | -1.398290 | 6.676912   |
| 68 | 6 | 0 | 0.269452  | 0.719655  | 6.700761   |
| 69 | 1 | 0 | -0.602358 | 1.398290  | 6.676912   |
| 70 | 6 | 0 | 1.088538  | 0.986469  | 7.968002   |
| 71 | 1 | 0 | 1.448555  | 2.020801  | 7.945817   |
| 72 | 1 | 0 | 1.975139  | 0.339535  | 7.945852   |
| 73 | 6 | 0 | 0.270582  | 0.715484  | 9.231223   |
| 74 | 1 | 0 | 0.884285  | 0.894775  | 10.120280  |
| 75 | 1 | 0 | -0.571449 | 1.419428  | 9.278623   |
| 76 | 6 | 0 | -0.270582 | -0.715484 | 9.231223   |
| 77 | 1 | 0 | -0.884285 | -0.894775 | 10.120280  |
| 78 | 1 | 0 | 0.571449  | -1.419428 | 9.278623   |
| 79 | 6 | 0 | -1.088538 | -0.986469 | 7.968002   |
| 80 | 1 | 0 | -1.975139 | -0.339535 | 7.945852   |
| 81 | 1 | 0 | -1.448555 | -2.020801 | 7.945817   |
| 82 | 6 | 0 | 0.786675  | 1.793400  | 4.700279   |
| 83 | 1 | 0 | -0.109315 | 2.419890  | 4.834650   |
| 84 | 6 | 0 | 1.597170  | 2.081993  | 3.500947   |
| 85 | 6 | 0 | 2.708553  | 1.288972  | 3.180877   |
| 86 | 1 | 0 | 2.947506  | 0.446140  | 3.824650   |
| 87 | 6 | 0 | 3.500947  | 1.597170  | 2.081993   |
| 88 | 6 | 0 | 3.180877  | 2.708553  | 1.288972   |
| 89 | 1 | 0 | 3.824650  | 2.947506  | 0.446140   |
| 90 | 6 | 0 | 2.081993  | 3.500947  | 1.597170   |
| 91 | 6 | 0 | 1.288972  | 3.180877  | 2.708553   |
| 92 | 1 | 0 | 0.446140  | 3.824650  | 2.947506   |
| 93 | 6 | 0 | 1.793400  | 4.700279  | 0.786675   |
| 94 | 1 | 0 | 2.419890  | 4.834650  | -0.109315  |
| 95 | 6 | 0 | 0.719655  | 6.700761  | 0.269452   |
| 96 | 1 | 0 | 1.398290  | 6.676912  | -0.602358  |
| 97 | 6 | 0 | -0.719655 | 6.700761  | -0.269452  |
| 98 | 1 | 0 | -1.398290 | 6.676912  | 0.602358   |
| 99 | 6 | 0 | -0.986469 | 7.968002  | -1.088538  |

|     |   |   |           |            |           |
|-----|---|---|-----------|------------|-----------|
| 100 | 1 | 0 | -2.020801 | 7.945817   | -1.448555 |
| 101 | 1 | 0 | -0.339535 | 7.945852   | -1.975139 |
| 102 | 6 | 0 | -0.715484 | 9.231223   | -0.270582 |
| 103 | 1 | 0 | -1.419428 | 9.278623   | 0.571449  |
| 104 | 1 | 0 | -0.894775 | 10.120280  | -0.884285 |
| 105 | 6 | 0 | 0.715484  | 9.231223   | 0.270582  |
| 106 | 1 | 0 | 1.419428  | 9.278623   | -0.571449 |
| 107 | 1 | 0 | 0.894775  | 10.120280  | 0.884285  |
| 108 | 6 | 0 | 0.986469  | 7.968002   | 1.088538  |
| 109 | 1 | 0 | 0.339535  | 7.945852   | 1.975139  |
| 110 | 1 | 0 | 2.020801  | 7.945817   | 1.448555  |
| 111 | 6 | 0 | -1.793400 | 4.700279   | -0.786675 |
| 112 | 1 | 0 | -2.419890 | 4.834650   | 0.109315  |
| 113 | 7 | 0 | -0.900606 | -5.538193  | 1.115241  |
| 114 | 7 | 0 | 0.900606  | -5.538193  | -1.115241 |
| 115 | 7 | 0 | 5.538193  | -1.115241  | -0.900606 |
| 116 | 7 | 0 | 5.538193  | 1.115241   | 0.900606  |
| 117 | 6 | 0 | -1.288972 | -3.180877  | 2.708553  |
| 118 | 1 | 0 | -0.446140 | -3.824650  | 2.947506  |
| 119 | 6 | 0 | -2.081993 | -3.500947  | 1.597170  |
| 120 | 6 | 0 | -1.793400 | -4.700279  | 0.786675  |
| 121 | 1 | 0 | -2.419890 | -4.834650  | -0.109315 |
| 122 | 6 | 0 | -0.719655 | -6.700761  | 0.269452  |
| 123 | 1 | 0 | -1.398290 | -6.676912  | -0.602358 |
| 124 | 6 | 0 | 0.719655  | -6.700761  | -0.269452 |
| 125 | 1 | 0 | 1.398290  | -6.676912  | 0.602358  |
| 126 | 6 | 0 | 0.986469  | -7.968002  | -1.088538 |
| 127 | 1 | 0 | 2.020801  | -7.945817  | -1.448555 |
| 128 | 1 | 0 | 0.339535  | -7.945852  | -1.975139 |
| 129 | 6 | 0 | 0.715484  | -9.231223  | -0.270582 |
| 130 | 1 | 0 | 0.894775  | -10.120280 | -0.884285 |
| 131 | 1 | 0 | 1.419428  | -9.278623  | 0.571449  |
| 132 | 6 | 0 | -0.715484 | -9.231223  | 0.270582  |
| 133 | 1 | 0 | -0.894775 | -10.120280 | 0.884285  |
| 134 | 1 | 0 | -1.419428 | -9.278623  | -0.571449 |
| 135 | 6 | 0 | -0.986469 | -7.968002  | 1.088538  |
| 136 | 1 | 0 | -0.339535 | -7.945852  | 1.975139  |
| 137 | 1 | 0 | -2.020801 | -7.945817  | 1.448555  |
| 138 | 6 | 0 | 1.793400  | -4.700279  | -0.786675 |
| 139 | 1 | 0 | 2.419890  | -4.834650  | 0.109315  |
| 140 | 6 | 0 | 2.081993  | -3.500947  | -1.597170 |
| 141 | 6 | 0 | 1.288972  | -3.180877  | -2.708553 |
| 142 | 1 | 0 | 0.446140  | -3.824650  | -2.947506 |
| 143 | 6 | 0 | 1.597170  | -2.081993  | -3.500947 |
| 144 | 6 | 0 | 2.708553  | -1.288972  | -3.180877 |
| 145 | 1 | 0 | 2.947506  | -0.446140  | -3.824650 |
| 146 | 6 | 0 | 3.500947  | -1.597170  | -2.081993 |
| 147 | 6 | 0 | 3.180877  | -2.708553  | -1.288972 |
| 148 | 1 | 0 | 3.824650  | -2.947506  | -0.446140 |
| 149 | 6 | 0 | 4.700279  | -0.786675  | -1.793400 |
| 150 | 1 | 0 | 4.834650  | 0.109315   | -2.419890 |
| 151 | 6 | 0 | 6.700761  | -0.269452  | -0.719655 |
| 152 | 1 | 0 | 6.676912  | 0.602358   | -1.398290 |
| 153 | 6 | 0 | 6.700761  | 0.269452   | 0.719655  |
| 154 | 1 | 0 | 6.676912  | -0.602358  | 1.398290  |
| 155 | 6 | 0 | 7.968002  | 1.088538   | 0.986469  |
| 156 | 1 | 0 | 7.945817  | 1.448555   | 2.020801  |
| 157 | 1 | 0 | 7.945852  | 1.975139   | 0.339535  |
| 158 | 6 | 0 | 9.231223  | 0.270582   | 0.715484  |

|     |    |   |           |           |           |
|-----|----|---|-----------|-----------|-----------|
| 159 | 1  | 0 | 9.278623  | -0.571449 | 1.419428  |
| 160 | 1  | 0 | 10.120280 | 0.884285  | 0.894775  |
| 161 | 6  | 0 | 9.231223  | -0.270582 | -0.715484 |
| 162 | 1  | 0 | 9.278623  | 0.571449  | -1.419428 |
| 163 | 1  | 0 | 10.120280 | -0.884285 | -0.894775 |
| 164 | 6  | 0 | 7.968002  | -1.088538 | -0.986469 |
| 165 | 1  | 0 | 7.945852  | -1.975139 | -0.339535 |
| 166 | 1  | 0 | 7.945817  | -1.448555 | -2.020801 |
| 167 | 6  | 0 | 4.700279  | 0.786675  | 1.793400  |
| 168 | 1  | 0 | 4.834650  | -0.109315 | 2.419890  |
| 169 | 36 | 0 | 2.180492  | -2.180492 | 2.180492  |
| 170 | 36 | 0 | -2.180492 | 2.180492  | 2.180492  |
| 171 | 36 | 0 | -2.180492 | -2.180492 | -2.180492 |
| 172 | 36 | 0 | 2.180492  | 2.180492  | -2.180492 |
| 173 | 36 | 0 | 0.000000  | 0.000000  | 0.000000  |

CH4@CC3 T cc3-rra

Standard orientation:

| Center<br>Number | Atomic<br>Number | Atomic<br>Type | Coordinates (Angstroms) |           |           |
|------------------|------------------|----------------|-------------------------|-----------|-----------|
|                  |                  |                | X                       | Y         | Z         |
| 1                | 7                | 0              | -5.542871               | -1.118596 | 0.902146  |
| 2                | 7                | 0              | -5.542871               | 1.118596  | -0.902146 |
| 3                | 7                | 0              | -1.118596               | 0.902146  | -5.542871 |
| 4                | 7                | 0              | 1.118596                | -0.902146 | -5.542871 |
| 5                | 6                | 0              | -3.182833               | -2.713252 | 1.291971  |
| 6                | 1                | 0              | -3.819692               | -2.946903 | 0.442618  |
| 7                | 6                | 0              | -3.505700               | -1.603064 | 2.085070  |
| 8                | 6                | 0              | -4.702693               | -0.790243 | 1.792920  |
| 9                | 1                | 0              | -4.833210               | 0.109321  | 2.414454  |
| 10               | 6                | 0              | -6.703127               | -0.269560 | 0.719666  |
| 11               | 1                | 0              | -6.678507               | 0.602350  | 1.398259  |
| 12               | 6                | 0              | -6.703127               | 0.269560  | -0.719666 |
| 13               | 1                | 0              | -6.678507               | -0.602350 | -1.398259 |
| 14               | 6                | 0              | -7.971050               | 1.086974  | -0.987513 |
| 15               | 1                | 0              | -7.948505               | 1.446272  | -2.022086 |
| 16               | 1                | 0              | -7.949291               | 1.974239  | -0.341441 |
| 17               | 6                | 0              | -9.234287               | 0.269332  | -0.716207 |
| 18               | 1                | 0              | -10.123238              | 0.882801  | -0.896821 |
| 19               | 1                | 0              | -9.281416               | -0.573888 | -1.418729 |
| 20               | 6                | 0              | -9.234287               | -0.269332 | 0.716207  |
| 21               | 1                | 0              | -10.123238              | -0.882801 | 0.896821  |
| 22               | 1                | 0              | -9.281416               | 0.573888  | 1.418729  |
| 23               | 6                | 0              | -7.971050               | -1.086974 | 0.987513  |
| 24               | 1                | 0              | -7.949291               | -1.974239 | 0.341441  |
| 25               | 1                | 0              | -7.948505               | -1.446272 | 2.022086  |
| 26               | 6                | 0              | -4.702693               | 0.790243  | -1.792920 |
| 27               | 1                | 0              | -4.833210               | -0.109321 | -2.414454 |
| 28               | 6                | 0              | -3.505700               | 1.603064  | -2.085070 |
| 29               | 6                | 0              | -3.182833               | 2.713252  | -1.291971 |
| 30               | 1                | 0              | -3.819692               | 2.946903  | -0.442618 |
| 31               | 6                | 0              | -2.085070               | 3.505700  | -1.603064 |
| 32               | 6                | 0              | -1.291971               | 3.182833  | -2.713252 |
| 33               | 1                | 0              | -0.442618               | 3.819692  | -2.946903 |
| 34               | 6                | 0              | -1.603064               | 2.085070  | -3.505700 |
| 35               | 6                | 0              | -2.713252               | 1.291971  | -3.182833 |
| 36               | 1                | 0              | -2.946903               | 0.442618  | -3.819692 |

|    |   |   |           |           |            |
|----|---|---|-----------|-----------|------------|
| 37 | 6 | 0 | -0.790243 | 1.792920  | -4.702693  |
| 38 | 1 | 0 | 0.109321  | 2.414454  | -4.833210  |
| 39 | 6 | 0 | -0.269560 | 0.719666  | -6.703127  |
| 40 | 1 | 0 | 0.602350  | 1.398259  | -6.678507  |
| 41 | 6 | 0 | 0.269560  | -0.719666 | -6.703127  |
| 42 | 1 | 0 | -0.602350 | -1.398259 | -6.678507  |
| 43 | 6 | 0 | 1.086974  | -0.987513 | -7.971050  |
| 44 | 1 | 0 | 1.446272  | -2.022086 | -7.948505  |
| 45 | 1 | 0 | 1.974239  | -0.341441 | -7.949291  |
| 46 | 6 | 0 | 0.269332  | -0.716207 | -9.234287  |
| 47 | 1 | 0 | -0.573888 | -1.418729 | -9.281416  |
| 48 | 1 | 0 | 0.882801  | -0.896821 | -10.123238 |
| 49 | 6 | 0 | -0.269332 | 0.716207  | -9.234287  |
| 50 | 1 | 0 | 0.573888  | 1.418729  | -9.281416  |
| 51 | 1 | 0 | -0.882801 | 0.896821  | -10.123238 |
| 52 | 6 | 0 | -1.086974 | 0.987513  | -7.971050  |
| 53 | 1 | 0 | -1.974239 | 0.341441  | -7.949291  |
| 54 | 1 | 0 | -1.446272 | 2.022086  | -7.948505  |
| 55 | 6 | 0 | 0.790243  | -1.792920 | -4.702693  |
| 56 | 1 | 0 | -0.109321 | -2.414454 | -4.833210  |
| 57 | 7 | 0 | -1.118596 | -0.902146 | 5.542871   |
| 58 | 7 | 0 | 1.118596  | 0.902146  | 5.542871   |
| 59 | 7 | 0 | 0.902146  | 5.542871  | 1.118596   |
| 60 | 7 | 0 | -0.902146 | 5.542871  | -1.118596  |
| 61 | 6 | 0 | -2.713252 | -1.291971 | 3.182833   |
| 62 | 1 | 0 | -2.946903 | -0.442618 | 3.819692   |
| 63 | 6 | 0 | -1.603064 | -2.085070 | 3.505700   |
| 64 | 6 | 0 | -0.790243 | -1.792920 | 4.702693   |
| 65 | 1 | 0 | 0.109321  | -2.414454 | 4.833210   |
| 66 | 6 | 0 | -0.269560 | -0.719666 | 6.703127   |
| 67 | 1 | 0 | 0.602350  | -1.398259 | 6.678507   |
| 68 | 6 | 0 | 0.269560  | 0.719666  | 6.703127   |
| 69 | 1 | 0 | -0.602350 | 1.398259  | 6.678507   |
| 70 | 6 | 0 | 1.086974  | 0.987513  | 7.971050   |
| 71 | 1 | 0 | 1.446272  | 2.022086  | 7.948505   |
| 72 | 1 | 0 | 1.974239  | 0.341441  | 7.949291   |
| 73 | 6 | 0 | 0.269332  | 0.716207  | 9.234287   |
| 74 | 1 | 0 | 0.882801  | 0.896821  | 10.123238  |
| 75 | 1 | 0 | -0.573888 | 1.418729  | 9.281416   |
| 76 | 6 | 0 | -0.269332 | -0.716207 | 9.234287   |
| 77 | 1 | 0 | -0.882801 | -0.896821 | 10.123238  |
| 78 | 1 | 0 | 0.573888  | -1.418729 | 9.281416   |
| 79 | 6 | 0 | -1.086974 | -0.987513 | 7.971050   |
| 80 | 1 | 0 | -1.974239 | -0.341441 | 7.949291   |
| 81 | 1 | 0 | -1.446272 | -2.022086 | 7.948505   |
| 82 | 6 | 0 | 0.790243  | 1.792920  | 4.702693   |
| 83 | 1 | 0 | -0.109321 | 2.414454  | 4.833210   |
| 84 | 6 | 0 | 1.603064  | 2.085070  | 3.505700   |
| 85 | 6 | 0 | 2.713252  | 1.291971  | 3.182833   |
| 86 | 1 | 0 | 2.946903  | 0.442618  | 3.819692   |
| 87 | 6 | 0 | 3.505700  | 1.603064  | 2.085070   |
| 88 | 6 | 0 | 3.182833  | 2.713252  | 1.291971   |
| 89 | 1 | 0 | 3.819692  | 2.946903  | 0.442618   |
| 90 | 6 | 0 | 2.085070  | 3.505700  | 1.603064   |
| 91 | 6 | 0 | 1.291971  | 3.182833  | 2.713252   |
| 92 | 1 | 0 | 0.442618  | 3.819692  | 2.946903   |
| 93 | 6 | 0 | 1.792920  | 4.702693  | 0.790243   |
| 94 | 1 | 0 | 2.414454  | 4.833210  | -0.109321  |
| 95 | 6 | 0 | 0.719666  | 6.703127  | 0.269560   |

|     |   |   |           |            |           |
|-----|---|---|-----------|------------|-----------|
| 96  | 1 | 0 | 1.398259  | 6.678507   | -0.602350 |
| 97  | 6 | 0 | -0.719666 | 6.703127   | -0.269560 |
| 98  | 1 | 0 | -1.398259 | 6.678507   | 0.602350  |
| 99  | 6 | 0 | -0.987513 | 7.971050   | -1.086974 |
| 100 | 1 | 0 | -2.022086 | 7.948505   | -1.446272 |
| 101 | 1 | 0 | -0.341441 | 7.949291   | -1.974239 |
| 102 | 6 | 0 | -0.716207 | 9.234287   | -0.269332 |
| 103 | 1 | 0 | -1.418729 | 9.281416   | 0.573888  |
| 104 | 1 | 0 | -0.896821 | 10.123238  | -0.882801 |
| 105 | 6 | 0 | 0.716207  | 9.234287   | 0.269332  |
| 106 | 1 | 0 | 1.418729  | 9.281416   | -0.573888 |
| 107 | 1 | 0 | 0.896821  | 10.123238  | 0.882801  |
| 108 | 6 | 0 | 0.987513  | 7.971050   | 1.086974  |
| 109 | 1 | 0 | 0.341441  | 7.949291   | 1.974239  |
| 110 | 1 | 0 | 2.022086  | 7.948505   | 1.446272  |
| 111 | 6 | 0 | -1.792920 | 4.702693   | -0.790243 |
| 112 | 1 | 0 | -2.414454 | 4.833210   | 0.109321  |
| 113 | 7 | 0 | -0.902146 | -5.542871  | 1.118596  |
| 114 | 7 | 0 | 0.902146  | -5.542871  | -1.118596 |
| 115 | 7 | 0 | 5.542871  | -1.118596  | -0.902146 |
| 116 | 7 | 0 | 5.542871  | 1.118596   | 0.902146  |
| 117 | 6 | 0 | -1.291971 | -3.182833  | 2.713252  |
| 118 | 1 | 0 | -0.442618 | -3.819692  | 2.946903  |
| 119 | 6 | 0 | -2.085070 | -3.505700  | 1.603064  |
| 120 | 6 | 0 | -1.792920 | -4.702693  | 0.790243  |
| 121 | 1 | 0 | -2.414454 | -4.833210  | -0.109321 |
| 122 | 6 | 0 | -0.719666 | -6.703127  | 0.269560  |
| 123 | 1 | 0 | -1.398259 | -6.678507  | -0.602350 |
| 124 | 6 | 0 | 0.719666  | -6.703127  | -0.269560 |
| 125 | 1 | 0 | 1.398259  | -6.678507  | 0.602350  |
| 126 | 6 | 0 | 0.987513  | -7.971050  | -1.086974 |
| 127 | 1 | 0 | 2.022086  | -7.948505  | -1.446272 |
| 128 | 1 | 0 | 0.341441  | -7.949291  | -1.974239 |
| 129 | 6 | 0 | 0.716207  | -9.234287  | -0.269332 |
| 130 | 1 | 0 | 0.896821  | -10.123238 | -0.882801 |
| 131 | 1 | 0 | 1.418729  | -9.281416  | 0.573888  |
| 132 | 6 | 0 | -0.716207 | -9.234287  | 0.269332  |
| 133 | 1 | 0 | -0.896821 | -10.123238 | 0.882801  |
| 134 | 1 | 0 | -1.418729 | -9.281416  | -0.573888 |
| 135 | 6 | 0 | -0.987513 | -7.971050  | 1.086974  |
| 136 | 1 | 0 | -0.341441 | -7.949291  | 1.974239  |
| 137 | 1 | 0 | -2.022086 | -7.948505  | 1.446272  |
| 138 | 6 | 0 | 1.792920  | -4.702693  | -0.790243 |
| 139 | 1 | 0 | 2.414454  | -4.833210  | 0.109321  |
| 140 | 6 | 0 | 2.085070  | -3.505700  | -1.603064 |
| 141 | 6 | 0 | 1.291971  | -3.182833  | -2.713252 |
| 142 | 1 | 0 | 0.442618  | -3.819692  | -2.946903 |
| 143 | 6 | 0 | 1.603064  | -2.085070  | -3.505700 |
| 144 | 6 | 0 | 2.713252  | -1.291971  | -3.182833 |
| 145 | 1 | 0 | 2.946903  | -0.442618  | -3.819692 |
| 146 | 6 | 0 | 3.505700  | -1.603064  | -2.085070 |
| 147 | 6 | 0 | 3.182833  | -2.713252  | -1.291971 |
| 148 | 1 | 0 | 3.819692  | -2.946903  | -0.442618 |
| 149 | 6 | 0 | 4.702693  | -0.790243  | -1.792920 |
| 150 | 1 | 0 | 4.833210  | 0.109321   | -2.414454 |
| 151 | 6 | 0 | 6.703127  | -0.269560  | -0.719666 |
| 152 | 1 | 0 | 6.678507  | 0.602350   | -1.398259 |
| 153 | 6 | 0 | 6.703127  | 0.269560   | 0.719666  |
| 154 | 1 | 0 | 6.678507  | -0.602350  | 1.398259  |

|     |   |   |           |           |           |
|-----|---|---|-----------|-----------|-----------|
| 155 | 6 | 0 | 7.971050  | 1.086974  | 0.987513  |
| 156 | 1 | 0 | 7.948505  | 1.446272  | 2.022086  |
| 157 | 1 | 0 | 7.949291  | 1.974239  | 0.341441  |
| 158 | 6 | 0 | 9.234287  | 0.269332  | 0.716207  |
| 159 | 1 | 0 | 9.281416  | -0.573888 | 1.418729  |
| 160 | 1 | 0 | 10.123238 | 0.882801  | 0.896821  |
| 161 | 6 | 0 | 9.234287  | -0.269332 | -0.716207 |
| 162 | 1 | 0 | 9.281416  | 0.573888  | -1.418729 |
| 163 | 1 | 0 | 10.123238 | -0.882801 | -0.896821 |
| 164 | 6 | 0 | 7.971050  | -1.086974 | -0.987513 |
| 165 | 1 | 0 | 7.949291  | -1.974239 | -0.341441 |
| 166 | 1 | 0 | 7.948505  | -1.446272 | -2.022086 |
| 167 | 6 | 0 | 4.702693  | 0.790243  | 1.792920  |
| 168 | 1 | 0 | 4.833210  | -0.109321 | 2.414454  |
| 169 | 6 | 0 | 0.000000  | 0.000000  | 0.000000  |
| 170 | 1 | 0 | 0.630261  | -0.630261 | 0.630261  |
| 171 | 1 | 0 | 0.630261  | 0.630261  | -0.630261 |
| 172 | 1 | 0 | -0.630261 | -0.630261 | -0.630261 |
| 173 | 1 | 0 | -0.630261 | 0.630261  | 0.630261  |

CH4@CC3 C3 cc3-raax

Standard orientation:

| Center<br>Number | Atomic<br>Number | Atomic<br>Type | Coordinates (Angstroms) |           |           |
|------------------|------------------|----------------|-------------------------|-----------|-----------|
|                  |                  |                | X                       | Y         | Z         |
| 1                | 7                | 0              | -0.564623               | 5.327254  | -2.085729 |
| 2                | 7                | 0              | -0.116284               | 3.709011  | -4.428972 |
| 3                | 7                | 0              | -3.153955               | -1.955210 | -4.428972 |
| 4                | 7                | 0              | -4.331226               | -3.152605 | -2.085729 |
| 5                | 6                | 0              | -1.330643               | 4.186579  | 0.444210  |
| 6                | 1                | 0              | -2.115898               | 4.393069  | -0.278477 |
| 7                | 6                | 0              | 0.000000                | 4.425823  | 0.073421  |
| 8                | 6                | 0              | 0.327780                | 4.970410  | -1.258940 |
| 9                | 1                | 0              | 1.401598                | 5.066514  | -1.483279 |
| 10               | 6                | 0              | -0.129022               | 5.889052  | -3.349234 |
| 11               | 1                | 0              | 0.972386                | 5.878148  | -3.438930 |
| 12               | 6                | 0              | -0.691955               | 5.037756  | -4.497990 |
| 13               | 1                | 0              | -1.790460               | 5.009648  | -4.380783 |
| 14               | 6                | 0              | -0.341566               | 5.664261  | -5.852275 |
| 15               | 1                | 0              | -0.765879               | 5.043588  | -6.648964 |
| 16               | 1                | 0              | 0.749322                | 5.634176  | -5.971608 |
| 17               | 6                | 0              | -0.842179               | 7.105521  | -5.951908 |
| 18               | 1                | 0              | -0.561609               | 7.533187  | -6.920208 |
| 19               | 1                | 0              | -1.939737               | 7.114642  | -5.905936 |
| 20               | 6                | 0              | -0.284385               | 7.953394  | -4.807421 |
| 21               | 1                | 0              | -0.672138               | 8.976111  | -4.861412 |
| 22               | 1                | 0              | 0.807480                | 8.021241  | -4.907595 |
| 23               | 6                | 0              | -0.632672               | 7.332941  | -3.454107 |
| 24               | 1                | 0              | -1.720947               | 7.327424  | -3.309907 |
| 25               | 1                | 0              | -0.205738               | 7.916630  | -2.631289 |
| 26               | 6                | 0              | -0.909442               | 2.726989  | -4.311393 |
| 27               | 1                | 0              | -2.000489               | 2.863386  | -4.250557 |
| 28               | 6                | 0              | -0.437430               | 1.328779  | -4.273324 |
| 29               | 6                | 0              | 0.933022                | 1.033339  | -4.271443 |
| 30               | 1                | 0              | 1.641504                | 1.857688  | -4.279643 |
| 31               | 6                | 0              | 1.369471                | -0.285564 | -4.273324 |
| 32               | 6                | 0              | 0.428387                | -1.324690 | -4.271443 |

|    |   |   |           |           |           |
|----|---|---|-----------|-----------|-----------|
| 33 | 1 | 0 | 0.788052  | -2.350428 | -4.279643 |
| 34 | 6 | 0 | -0.932041 | -1.043215 | -4.273324 |
| 35 | 6 | 0 | -1.361409 | 0.291351  | -4.271443 |
| 36 | 1 | 0 | -2.429557 | 0.492741  | -4.279643 |
| 37 | 6 | 0 | -1.906921 | -2.151095 | -4.311393 |
| 38 | 1 | 0 | -1.479521 | -3.164167 | -4.250557 |
| 39 | 6 | 0 | -4.016847 | -3.118128 | -4.497990 |
| 40 | 1 | 0 | -3.443252 | -4.055408 | -4.380783 |
| 41 | 6 | 0 | -5.035558 | -3.056262 | -3.349234 |
| 42 | 1 | 0 | -5.576819 | -2.096963 | -3.438930 |
| 43 | 6 | 0 | -6.034177 | -4.214381 | -3.454107 |
| 44 | 1 | 0 | -6.753133 | -4.136489 | -2.631289 |
| 45 | 1 | 0 | -5.485261 | -5.154096 | -3.309907 |
| 46 | 6 | 0 | -6.745648 | -4.222982 | -4.807421 |
| 47 | 1 | 0 | -7.350339 | -3.311323 | -4.907595 |
| 48 | 1 | 0 | -7.437471 | -5.070144 | -4.861412 |
| 49 | 6 | 0 | -5.732472 | -4.282109 | -5.951908 |
| 50 | 1 | 0 | -5.191593 | -5.237183 | -5.905936 |
| 51 | 1 | 0 | -6.243127 | -4.252961 | -6.920208 |
| 52 | 6 | 0 | -4.734611 | -3.127935 | -5.852275 |
| 53 | 1 | 0 | -5.254001 | -2.168156 | -5.971608 |
| 54 | 1 | 0 | -3.984936 | -3.185065 | -6.648964 |
| 55 | 6 | 0 | -4.468391 | -2.201339 | -1.258940 |
| 56 | 1 | 0 | -5.088529 | -1.319437 | -1.483279 |
| 57 | 7 | 0 | 3.001595  | 3.800309  | 3.038149  |
| 58 | 7 | 0 | 4.459518  | 1.329059  | 3.285294  |
| 59 | 7 | 0 | 4.895849  | -2.174649 | -2.085729 |
| 60 | 7 | 0 | 3.270240  | -1.753800 | -4.428972 |
| 61 | 6 | 0 | 1.019676  | 4.178167  | 0.984192  |
| 62 | 1 | 0 | 2.059059  | 4.362619  | 0.724900  |
| 63 | 6 | 0 | 0.725154  | 3.696896  | 2.267413  |
| 64 | 6 | 0 | 1.797469  | 3.468652  | 3.255824  |
| 65 | 1 | 0 | 1.480645  | 3.008906  | 4.205224  |
| 66 | 6 | 0 | 3.967925  | 3.568695  | 4.093266  |
| 67 | 1 | 0 | 3.501226  | 3.086404  | 4.971200  |
| 68 | 6 | 0 | 5.057090  | 2.617902  | 3.573036  |
| 69 | 1 | 0 | 5.490060  | 3.075651  | 2.665184  |
| 70 | 6 | 0 | 6.157495  | 2.435137  | 4.624378  |
| 71 | 1 | 0 | 6.924238  | 1.765006  | 4.220571  |
| 72 | 1 | 0 | 5.718932  | 1.929923  | 5.494755  |
| 73 | 6 | 0 | 6.763253  | 3.774964  | 5.043536  |
| 74 | 1 | 0 | 7.531459  | 3.615547  | 5.807535  |
| 75 | 1 | 0 | 7.263395  | 4.235369  | 4.180560  |
| 76 | 6 | 0 | 5.679123  | 4.722412  | 5.560119  |
| 77 | 1 | 0 | 6.111022  | 5.692750  | 5.826809  |
| 78 | 1 | 0 | 5.242616  | 4.305304  | 6.477873  |
| 79 | 6 | 0 | 4.579955  | 4.909242  | 4.513867  |
| 80 | 1 | 0 | 4.989458  | 5.394562  | 3.618380  |
| 81 | 1 | 0 | 3.782758  | 5.558919  | 4.891178  |
| 82 | 6 | 0 | 4.560092  | 0.880602  | 2.103663  |
| 83 | 1 | 0 | 5.069826  | 1.445001  | 1.307248  |
| 84 | 6 | 0 | 4.030487  | -0.440924 | 1.714070  |
| 85 | 6 | 0 | 3.297647  | -1.214858 | 2.624608  |
| 86 | 1 | 0 | 3.105374  | -0.809573 | 3.615001  |
| 87 | 6 | 0 | 2.839028  | -2.476450 | 2.267413  |
| 88 | 6 | 0 | 3.108561  | -2.972148 | 0.984192  |
| 89 | 1 | 0 | 2.748610  | -3.964507 | 0.724900  |
| 90 | 6 | 0 | 3.832875  | -2.212912 | 0.073421  |
| 91 | 6 | 0 | 4.291005  | -0.940919 | 0.444210  |

|     |   |   |           |           |           |
|-----|---|---|-----------|-----------|-----------|
| 92  | 1 | 0 | 4.862459  | -0.364113 | -0.278477 |
| 93  | 6 | 0 | 4.140612  | -2.769071 | -1.258940 |
| 94  | 1 | 0 | 3.686930  | -3.747077 | -1.483279 |
| 95  | 6 | 0 | 5.164579  | -2.832790 | -3.349234 |
| 96  | 1 | 0 | 4.604432  | -3.781185 | -3.438930 |
| 97  | 6 | 0 | 4.708802  | -1.919628 | -4.497990 |
| 98  | 1 | 0 | 5.233712  | -0.954240 | -4.380783 |
| 99  | 6 | 0 | 5.076176  | -2.536326 | -5.852275 |
| 100 | 1 | 0 | 4.750815  | -1.858523 | -6.648964 |
| 101 | 1 | 0 | 4.504679  | -3.466020 | -5.971608 |
| 102 | 6 | 0 | 6.574651  | -2.823412 | -5.951908 |
| 103 | 1 | 0 | 7.131330  | -1.877460 | -5.905936 |
| 104 | 1 | 0 | 6.804736  | -3.280226 | -6.920208 |
| 105 | 6 | 0 | 7.030034  | -3.730412 | -4.807421 |
| 106 | 1 | 0 | 6.542859  | -4.709919 | -4.907595 |
| 107 | 1 | 0 | 8.109609  | -3.905967 | -4.861412 |
| 108 | 6 | 0 | 6.666849  | -3.118560 | -3.454107 |
| 109 | 1 | 0 | 7.206209  | -2.173328 | -3.309907 |
| 110 | 1 | 0 | 6.958871  | -3.780141 | -2.631289 |
| 111 | 6 | 0 | 2.816363  | -0.575894 | -4.311393 |
| 112 | 1 | 0 | 3.480009  | 0.300781  | -4.250557 |
| 113 | 7 | 0 | -3.380758 | 3.197526  | 3.285294  |
| 114 | 7 | 0 | -4.791962 | 0.699303  | 3.038149  |
| 115 | 7 | 0 | -1.078760 | -4.526586 | 3.285294  |
| 116 | 7 | 0 | 1.790367  | -4.499612 | 3.038149  |
| 117 | 6 | 0 | -0.596726 | 3.463275  | 2.624608  |
| 118 | 1 | 0 | -0.851576 | 3.094119  | 3.615001  |
| 119 | 6 | 0 | -1.633392 | 3.710967  | 1.714070  |
| 120 | 6 | 0 | -3.042669 | 3.508854  | 2.103663  |
| 121 | 1 | 0 | -3.786321 | 3.668097  | 1.307248  |
| 122 | 6 | 0 | -4.795715 | 3.070618  | 3.573036  |
| 123 | 1 | 0 | -5.408622 | 3.216706  | 2.665184  |
| 124 | 6 | 0 | -5.074543 | 1.651977  | 4.093266  |
| 125 | 1 | 0 | -4.423518 | 1.488949  | 4.971200  |
| 126 | 6 | 0 | -6.541506 | 1.511736  | 4.513867  |
| 127 | 1 | 0 | -6.705544 | 0.496505  | 4.891178  |
| 128 | 1 | 0 | -7.166557 | 1.623717  | 3.618380  |
| 129 | 6 | 0 | -6.929290 | 2.557059  | 5.560119  |
| 130 | 1 | 0 | -7.985577 | 2.445926  | 5.826809  |
| 131 | 1 | 0 | -6.349810 | 2.387587  | 6.477873  |
| 132 | 6 | 0 | -6.650841 | 3.969667  | 5.043536  |
| 133 | 1 | 0 | -6.896885 | 4.714661  | 5.807535  |
| 134 | 1 | 0 | -7.299635 | 4.172600  | 4.180560  |
| 135 | 6 | 0 | -5.187638 | 4.114979  | 4.624378  |
| 136 | 1 | 0 | -4.530828 | 3.987778  | 5.494755  |
| 137 | 1 | 0 | -4.990659 | 5.114063  | 4.220571  |
| 138 | 6 | 0 | -3.902676 | -0.177672 | 3.255824  |
| 139 | 1 | 0 | -3.346111 | -0.222176 | 4.205224  |
| 140 | 6 | 0 | -3.564182 | -1.220446 | 2.267413  |
| 141 | 6 | 0 | -4.128237 | -1.206019 | 0.984192  |
| 142 | 1 | 0 | -4.807669 | -0.398112 | 0.724900  |
| 143 | 6 | 0 | -3.832875 | -2.212912 | 0.073421  |
| 144 | 6 | 0 | -2.960362 | -3.245660 | 0.444210  |
| 145 | 1 | 0 | -2.746560 | -4.028956 | -0.278477 |
| 146 | 6 | 0 | -2.397095 | -3.270042 | 1.714070  |
| 147 | 6 | 0 | -2.700922 | -2.248417 | 2.624608  |
| 148 | 1 | 0 | -2.253798 | -2.284546 | 3.615001  |
| 149 | 6 | 0 | -1.517422 | -4.389456 | 2.103663  |
| 150 | 1 | 0 | -1.283505 | -5.113098 | 1.307248  |



|     |   |   |           |           |          |
|-----|---|---|-----------|-----------|----------|
| 151 | 6 | 0 | -0.261376 | -5.688520 | 3.573036 |
| 152 | 1 | 0 | -0.081438 | -6.292357 | 2.665184 |
| 153 | 6 | 0 | 1.106617  | -5.220672 | 4.093266 |
| 154 | 1 | 0 | 0.922291  | -4.575353 | 4.971200 |
| 155 | 6 | 0 | 1.961551  | -6.420978 | 4.513867 |
| 156 | 1 | 0 | 2.922786  | -6.055424 | 4.891178 |
| 157 | 1 | 0 | 2.177099  | -7.018279 | 3.618380 |
| 158 | 6 | 0 | 1.250167  | -7.279471 | 5.560119 |
| 159 | 1 | 0 | 1.107195  | -6.692890 | 6.477873 |
| 160 | 1 | 0 | 1.874555  | -8.138675 | 5.826809 |
| 161 | 6 | 0 | -0.112412 | -7.744631 | 5.043536 |
| 162 | 1 | 0 | 0.036240  | -8.407969 | 4.180560 |
| 163 | 1 | 0 | -0.634574 | -8.330208 | 5.807535 |
| 164 | 6 | 0 | -0.969857 | -6.550116 | 4.624378 |
| 165 | 1 | 0 | -1.188103 | -5.917702 | 5.494755 |
| 166 | 1 | 0 | -1.933579 | -6.879069 | 4.220571 |
| 167 | 6 | 0 | 2.105206  | -3.290980 | 3.255824 |
| 168 | 1 | 0 | 1.865466  | -2.786729 | 4.205224 |
| 169 | 6 | 0 | 0.000000  | 0.000000  | 2.854800 |
| 170 | 1 | 0 | 0.000000  | 0.000000  | 3.948206 |
| 171 | 1 | 0 | 0.066383  | -1.027917 | 2.489888 |
| 172 | 1 | 0 | -0.923393 | 0.456469  | 2.489888 |
| 173 | 1 | 0 | 0.857011  | 0.571447  | 2.489888 |

-----

3CH4@CC3 C3 cc3-rbb

Standard orientation:

| Center<br>Number | Atomic<br>Number | Atomic<br>Type | Coordinates (Angstroms) |           |           |
|------------------|------------------|----------------|-------------------------|-----------|-----------|
|                  |                  |                | X                       | Y         | Z         |
| 1                | 7                | 0              | -4.780043               | -0.717485 | -3.106630 |
| 2                | 7                | 0              | -3.386840               | -3.220823 | -3.377127 |
| 3                | 7                | 0              | -0.577006               | -5.321288 | 1.990649  |
| 4                | 7                | 0              | -0.147225               | -3.700065 | 4.323246  |
| 5                | 6                | 0              | -4.115255               | 1.196615  | -1.065869 |
| 6                | 1                | 0              | -4.789995               | 0.386071  | -0.801789 |
| 7                | 6                | 0              | -3.559407               | 1.213971  | -2.352827 |
| 8                | 6                | 0              | -3.907680               | 0.172748  | -3.339130 |
| 9                | 1                | 0              | -3.377112               | 0.231160  | -4.302317 |
| 10               | 6                | 0              | -5.078508               | -1.663212 | -4.164030 |
| 11               | 1                | 0              | -4.435874               | -1.498586 | -5.047839 |
| 12               | 6                | 0              | -4.803148               | -3.086149 | -3.653938 |
| 13               | 1                | 0              | -5.409766               | -3.232478 | -2.741910 |
| 14               | 6                | 0              | -5.209101               | -4.123156 | -4.706768 |
| 15               | 1                | 0              | -5.012881               | -5.125189 | -4.310083 |
| 16               | 1                | 0              | -4.559938               | -3.994261 | -5.582625 |
| 17               | 6                | 0              | -6.675414               | -3.968769 | -5.111378 |
| 18               | 1                | 0              | -6.932512               | -4.708190 | -5.877123 |
| 19               | 1                | 0              | -7.317135               | -4.173085 | -4.243484 |
| 20               | 6                | 0              | -6.951423               | -2.552012 | -5.617780 |
| 21               | 1                | 0              | -8.009501               | -2.434045 | -5.874265 |
| 22               | 1                | 0              | -6.379519               | -2.380697 | -6.539952 |
| 23               | 6                | 0              | -6.548901               | -1.513580 | -4.569940 |
| 24               | 1                | 0              | -7.166134               | -1.627022 | -3.669226 |
| 25               | 1                | 0              | -6.711456               | -0.495758 | -4.940891 |
| 26               | 6                | 0              | -3.041842               | -3.509496 | -2.191826 |
| 27               | 1                | 0              | -3.780365               | -3.648741 | -1.386624 |
| 28               | 6                | 0              | -1.631310               | -3.707072 | -1.805168 |

|    |   |   |           |           |           |
|----|---|---|-----------|-----------|-----------|
| 29 | 6 | 0 | -0.593570 | -3.461259 | -2.714645 |
| 30 | 1 | 0 | -0.848195 | -3.102407 | -3.708627 |
| 31 | 6 | 0 | 0.728374  | -3.689523 | -2.352827 |
| 32 | 6 | 0 | 1.021328  | -4.162223 | -1.065869 |
| 33 | 1 | 0 | 2.060650  | -4.341292 | -0.801789 |
| 34 | 6 | 0 | 0.000000  | -4.407023 | -0.156492 |
| 35 | 6 | 0 | -1.330007 | -4.174932 | -0.532373 |
| 36 | 1 | 0 | -2.117355 | -4.379743 | 0.188800  |
| 37 | 6 | 0 | 0.321902  | -4.948662 | 1.177970  |
| 38 | 1 | 0 | 1.394291  | -5.033399 | 1.414245  |
| 39 | 6 | 0 | -0.154305 | -5.882544 | 3.257999  |
| 40 | 1 | 0 | 0.946101  | -5.872210 | 3.359148  |
| 41 | 6 | 0 | -0.728514 | -5.025323 | 4.396641  |
| 42 | 1 | 0 | -1.825341 | -4.994854 | 4.265359  |
| 43 | 6 | 0 | -0.395587 | -5.645731 | 5.757641  |
| 44 | 1 | 0 | -0.828127 | -5.020899 | 6.546575  |
| 45 | 1 | 0 | 0.693823  | -5.617283 | 5.889810  |
| 46 | 6 | 0 | -0.900495 | -7.085547 | 5.857021  |
| 47 | 1 | 0 | -1.997449 | -7.092570 | 5.798138  |
| 48 | 1 | 0 | -0.632451 | -7.509957 | 6.830291  |
| 49 | 6 | 0 | -0.330942 | -7.939613 | 4.722814  |
| 50 | 1 | 0 | 0.759494  | -8.009478 | 4.836415  |
| 51 | 1 | 0 | -0.721492 | -8.961270 | 4.776822  |
| 52 | 6 | 0 | -0.661607 | -7.324912 | 3.362392  |
| 53 | 1 | 0 | -1.747970 | -7.318073 | 3.204774  |
| 54 | 1 | 0 | -0.225622 | -7.913093 | 2.547574  |
| 55 | 6 | 0 | -0.931359 | -2.718177 | 4.154434  |
| 56 | 1 | 0 | -2.020630 | -2.850161 | 4.057901  |
| 57 | 7 | 0 | -1.095894 | 4.543501  | -3.377127 |
| 58 | 7 | 0 | 1.768662  | 4.498381  | -3.106630 |
| 59 | 7 | 0 | 4.482734  | -1.322678 | -3.377127 |
| 60 | 7 | 0 | 3.011382  | -3.780896 | -3.106630 |
| 61 | 6 | 0 | -2.700753 | 2.244676  | -2.714645 |
| 62 | 1 | 0 | -2.262666 | 2.285762  | -3.708627 |
| 63 | 6 | 0 | -2.394763 | 3.266292  | -1.805168 |
| 64 | 6 | 0 | -1.518392 | 4.389061  | -2.191826 |
| 65 | 1 | 0 | -1.269720 | 5.098262  | -1.386624 |
| 66 | 6 | 0 | -0.271109 | 5.702722  | -3.653938 |
| 67 | 1 | 0 | -0.094525 | 6.301234  | -2.741910 |
| 68 | 6 | 0 | 1.098871  | 5.229723  | -4.164030 |
| 69 | 1 | 0 | 0.920123  | 4.590873  | -5.047839 |
| 70 | 6 | 0 | 1.963651  | 6.428305  | -4.569940 |
| 71 | 1 | 0 | 2.926390  | 6.060171  | -4.940891 |
| 72 | 1 | 0 | 2.174025  | 7.019565  | -3.669226 |
| 73 | 6 | 0 | 1.265604  | 7.296115  | -5.617780 |
| 74 | 1 | 0 | 1.896806  | 8.153453  | -5.874265 |
| 75 | 1 | 0 | 1.128016  | 6.715174  | -6.539952 |
| 76 | 6 | 0 | -0.099347 | 7.765463  | -5.111378 |
| 77 | 1 | 0 | -0.611156 | 8.357827  | -5.877123 |
| 78 | 1 | 0 | 0.044569  | 8.423367  | -4.243484 |
| 79 | 6 | 0 | -0.966207 | 6.572792  | -4.706768 |
| 80 | 1 | 0 | -1.179162 | 5.946153  | -5.582625 |
| 81 | 1 | 0 | -1.932104 | 6.903877  | -4.310083 |
| 82 | 6 | 0 | 2.103444  | 3.297776  | -3.339130 |
| 83 | 1 | 0 | 1.888746  | 2.809085  | -4.302317 |
| 84 | 6 | 0 | 2.831033  | 2.475552  | -2.352827 |
| 85 | 6 | 0 | 3.093927  | 2.965607  | -1.065869 |
| 86 | 1 | 0 | 2.729344  | 3.955222  | -0.801789 |
| 87 | 6 | 0 | 3.816594  | 2.203512  | -0.156492 |

|     |   |   |           |           |           |
|-----|---|---|-----------|-----------|-----------|
| 88  | 6 | 0 | 4.280601  | 0.935646  | -0.532373 |
| 89  | 1 | 0 | 4.851647  | 0.356188  | 0.188800  |
| 90  | 6 | 0 | 4.026073  | 0.440780  | -1.805168 |
| 91  | 6 | 0 | 3.294323  | 1.216583  | -2.714645 |
| 92  | 1 | 0 | 3.110861  | 0.816645  | -3.708627 |
| 93  | 6 | 0 | 4.560234  | -0.879564 | -2.191826 |
| 94  | 1 | 0 | 5.050085  | -1.449521 | -1.386624 |
| 95  | 6 | 0 | 5.074257  | -2.616573 | -3.653938 |
| 96  | 1 | 0 | 5.504291  | -3.068756 | -2.741910 |
| 97  | 6 | 0 | 3.979637  | -3.566511 | -4.164030 |
| 98  | 1 | 0 | 3.515751  | -3.092287 | -5.047839 |
| 99  | 6 | 0 | 4.585250  | -4.914724 | -4.569940 |
| 100 | 1 | 0 | 3.785067  | -5.564413 | -4.940891 |
| 101 | 1 | 0 | 4.992109  | -5.392543 | -3.669226 |
| 102 | 6 | 0 | 5.685819  | -4.744103 | -5.617780 |
| 103 | 1 | 0 | 5.251503  | -4.334478 | -6.539952 |
| 104 | 1 | 0 | 6.112695  | -5.719409 | -5.874265 |
| 105 | 6 | 0 | 6.774762  | -3.796694 | -5.111378 |
| 106 | 1 | 0 | 7.272565  | -4.250282 | -4.243484 |
| 107 | 1 | 0 | 7.543668  | -3.649636 | -5.877123 |
| 108 | 6 | 0 | 6.175308  | -2.449636 | -4.706768 |
| 109 | 1 | 0 | 5.739100  | -1.951892 | -5.582625 |
| 110 | 1 | 0 | 6.944985  | -1.778688 | -4.310083 |
| 111 | 6 | 0 | 1.804236  | -3.470524 | -3.339130 |
| 112 | 1 | 0 | 1.488366  | -3.040245 | -4.302317 |
| 113 | 7 | 0 | -4.319867 | 3.160346  | 1.990649  |
| 114 | 7 | 0 | -3.130738 | 1.977533  | 4.323246  |
| 115 | 7 | 0 | 3.277963  | 1.722532  | 4.323246  |
| 116 | 7 | 0 | 4.896873  | 2.160942  | 1.990649  |
| 117 | 6 | 0 | -2.950594 | 3.239286  | -0.532373 |
| 118 | 1 | 0 | -2.734292 | 4.023555  | 0.188800  |
| 119 | 6 | 0 | -3.816594 | 2.203512  | -0.156492 |
| 120 | 6 | 0 | -4.446618 | 2.195556  | 1.177970  |
| 121 | 1 | 0 | -5.056197 | 1.309208  | 1.414245  |
| 122 | 6 | 0 | -5.017280 | 3.074904  | 3.257999  |
| 123 | 1 | 0 | -5.558534 | 2.116758  | 3.359148  |
| 124 | 6 | 0 | -3.987800 | 3.143573  | 4.396641  |
| 125 | 1 | 0 | -3.413001 | 4.078219  | 4.265359  |
| 126 | 6 | 0 | -4.691553 | 3.165454  | 5.757641  |
| 127 | 1 | 0 | -3.934162 | 3.227628  | 6.546575  |
| 128 | 1 | 0 | -5.211621 | 2.207773  | 5.889810  |
| 129 | 6 | 0 | -5.686016 | 4.322625  | 5.857021  |
| 130 | 1 | 0 | -6.187588 | 4.302697  | 6.830291  |
| 131 | 1 | 0 | -5.143622 | 5.276126  | 5.798138  |
| 132 | 6 | 0 | -6.710435 | 4.256411  | 4.722814  |
| 133 | 1 | 0 | -7.399941 | 5.105466  | 4.776822  |
| 134 | 1 | 0 | -7.316158 | 3.346998  | 4.836415  |
| 135 | 6 | 0 | -6.012756 | 4.235425  | 3.362392  |
| 136 | 1 | 0 | -5.463652 | 5.172823  | 3.204774  |
| 137 | 1 | 0 | -6.740129 | 4.151941  | 2.547574  |
| 138 | 6 | 0 | -1.888331 | 2.165669  | 4.154434  |
| 139 | 1 | 0 | -1.457997 | 3.174998  | 4.057901  |
| 140 | 6 | 0 | -0.922943 | 1.050687  | 4.107150  |
| 141 | 6 | 0 | -1.363886 | -0.279432 | 4.104941  |
| 142 | 1 | 0 | -2.433637 | -0.472534 | 4.113840  |
| 143 | 6 | 0 | -0.448450 | -1.324635 | 4.107150  |
| 144 | 6 | 0 | 0.923938  | -1.041444 | 4.104941  |
| 145 | 1 | 0 | 1.626044  | -1.871324 | 4.113840  |
| 146 | 6 | 0 | 1.371393  | 0.273949  | 4.107150  |

|     |   |   |           |           |           |
|-----|---|---|-----------|-----------|-----------|
| 147 | 6 | 0 | 0.439948  | 1.320876  | 4.104941  |
| 148 | 1 | 0 | 0.807592  | 2.343858  | 4.113840  |
| 149 | 6 | 0 | 2.819690  | 0.552508  | 4.154434  |
| 150 | 1 | 0 | 3.478627  | -0.324836 | 4.057901  |
| 151 | 6 | 0 | 4.716315  | 1.881750  | 4.396641  |
| 152 | 1 | 0 | 5.238341  | 0.916636  | 4.265359  |
| 153 | 6 | 0 | 5.171585  | 2.807639  | 3.257999  |
| 154 | 1 | 0 | 4.612433  | 3.755452  | 3.359148  |
| 155 | 6 | 0 | 6.674363  | 3.089487  | 3.362392  |
| 156 | 1 | 0 | 6.965751  | 3.761152  | 2.547574  |
| 157 | 1 | 0 | 7.211622  | 2.145250  | 3.204774  |
| 158 | 6 | 0 | 7.041377  | 3.683202  | 4.722814  |
| 159 | 1 | 0 | 6.556665  | 4.662480  | 4.836415  |
| 160 | 1 | 0 | 8.121434  | 3.855804  | 4.776822  |
| 161 | 6 | 0 | 6.586511  | 2.762922  | 5.857021  |
| 162 | 1 | 0 | 7.141070  | 1.816444  | 5.798138  |
| 163 | 1 | 0 | 6.820039  | 3.207260  | 6.830291  |
| 164 | 6 | 0 | 5.087140  | 2.480277  | 5.757641  |
| 165 | 1 | 0 | 4.517798  | 3.409510  | 5.889810  |
| 166 | 1 | 0 | 4.762289  | 1.793271  | 6.546575  |
| 167 | 6 | 0 | 4.124716  | 2.753106  | 1.177970  |
| 168 | 1 | 0 | 3.661906  | 3.724191  | 1.414245  |
| 169 | 6 | 0 | 0.275231  | 2.457368  | 0.888065  |
| 170 | 6 | 0 | -2.265758 | -0.990327 | 0.888065  |
| 171 | 1 | 0 | 0.224510  | 2.769806  | -0.158109 |
| 172 | 1 | 0 | -1.638895 | -0.097373 | 0.950159  |
| 173 | 1 | 0 | -2.510977 | -1.190472 | -0.158109 |
| 174 | 1 | 0 | -1.726162 | -1.843900 | 1.308097  |
| 175 | 1 | 0 | -0.733783 | 2.416850  | 1.308097  |
| 176 | 1 | 0 | 0.735120  | 1.468012  | 0.950159  |
| 177 | 6 | 0 | 1.990528  | -1.467041 | 0.888065  |
| 178 | 1 | 0 | 2.459945  | -0.572950 | 1.308097  |
| 179 | 1 | 0 | 0.903776  | -1.370638 | 0.950159  |
| 180 | 1 | 0 | 2.286467  | -1.579334 | -0.158109 |
| 181 | 1 | 0 | -3.184520 | -0.822114 | 1.456536  |
| 182 | 1 | 0 | 0.880289  | 3.168932  | 1.456536  |
| 183 | 1 | 0 | 2.304231  | -2.346818 | 1.456536  |

4CH4@CC3-a T cc3-ra

Standard orientation:

| Center<br>Number | Atomic<br>Number | Atomic<br>Type | Coordinates (Angstroms) |           |           |
|------------------|------------------|----------------|-------------------------|-----------|-----------|
|                  |                  |                | X                       | Y         | Z         |
| 1                | 7                | 0              | -0.892782               | 5.544633  | -1.124480 |
| 2                | 7                | 0              | 0.892782                | 5.544633  | 1.124480  |
| 3                | 7                | 0              | 5.544633                | 1.124480  | 0.892782  |
| 4                | 7                | 0              | 5.544633                | -1.124480 | -0.892782 |
| 5                | 6                | 0              | -1.307424               | 3.196024  | -2.733540 |
| 6                | 1                | 0              | -0.457586               | 3.830363  | -2.972625 |
| 7                | 6                | 0              | -2.095952               | 3.521623  | -1.621649 |
| 8                | 6                | 0              | -1.799406               | 4.716459  | -0.808683 |
| 9                | 1                | 0              | -2.433789               | 4.857449  | 0.080732  |
| 10               | 6                | 0              | -0.716665               | 6.706676  | -0.276443 |
| 11               | 1                | 0              | -1.403934               | 6.684206  | 0.588657  |
| 12               | 6                | 0              | 0.716665                | 6.706676  | 0.276443  |
| 13               | 1                | 0              | 1.403934                | 6.684206  | -0.588657 |
| 14               | 6                | 0              | 0.975254                | 7.974034  | 1.098211  |

|    |   |   |           |           |           |
|----|---|---|-----------|-----------|-----------|
| 15 | 1 | 0 | 2.005933  | 7.951650  | 1.468540  |
| 16 | 1 | 0 | 0.319558  | 7.951802  | 1.978371  |
| 17 | 6 | 0 | 0.712655  | 9.237465  | 0.277856  |
| 18 | 1 | 0 | 0.885575  | 10.126359 | 0.893631  |
| 19 | 1 | 0 | 1.425277  | 9.285138  | -0.556828 |
| 20 | 6 | 0 | -0.712655 | 9.237465  | -0.277856 |
| 21 | 1 | 0 | -0.885575 | 10.126359 | -0.893631 |
| 22 | 1 | 0 | -1.425277 | 9.285138  | 0.556828  |
| 23 | 6 | 0 | -0.975254 | 7.974034  | -1.098211 |
| 24 | 1 | 0 | -0.319558 | 7.951802  | -1.978371 |
| 25 | 1 | 0 | -2.005933 | 7.951650  | -1.468540 |
| 26 | 6 | 0 | 1.799406  | 4.716459  | 0.808683  |
| 27 | 1 | 0 | 2.433789  | 4.857449  | -0.080732 |
| 28 | 6 | 0 | 2.095952  | 3.521623  | 1.621649  |
| 29 | 6 | 0 | 1.307424  | 3.196024  | 2.733540  |
| 30 | 1 | 0 | 0.457586  | 3.830363  | 2.972625  |
| 31 | 6 | 0 | 1.621649  | 2.095952  | 3.521623  |
| 32 | 6 | 0 | 2.733540  | 1.307424  | 3.196024  |
| 33 | 1 | 0 | 2.972625  | 0.457586  | 3.830363  |
| 34 | 6 | 0 | 3.521623  | 1.621649  | 2.095952  |
| 35 | 6 | 0 | 3.196024  | 2.733540  | 1.307424  |
| 36 | 1 | 0 | 3.830363  | 2.972625  | 0.457586  |
| 37 | 6 | 0 | 4.716459  | 0.808683  | 1.799406  |
| 38 | 1 | 0 | 4.857449  | -0.080732 | 2.433789  |
| 39 | 6 | 0 | 6.706676  | 0.276443  | 0.716665  |
| 40 | 1 | 0 | 6.684206  | -0.588657 | 1.403934  |
| 41 | 6 | 0 | 6.706676  | -0.276443 | -0.716665 |
| 42 | 1 | 0 | 6.684206  | 0.588657  | -1.403934 |
| 43 | 6 | 0 | 7.974034  | -1.098211 | -0.975254 |
| 44 | 1 | 0 | 7.951650  | -1.468540 | -2.005933 |
| 45 | 1 | 0 | 7.951802  | -1.978371 | -0.319558 |
| 46 | 6 | 0 | 9.237465  | -0.277856 | -0.712655 |
| 47 | 1 | 0 | 9.285138  | 0.556828  | -1.425277 |
| 48 | 1 | 0 | 10.126359 | -0.893631 | -0.885575 |
| 49 | 6 | 0 | 9.237465  | 0.277856  | 0.712655  |
| 50 | 1 | 0 | 9.285138  | -0.556828 | 1.425277  |
| 51 | 1 | 0 | 10.126359 | 0.893631  | 0.885575  |
| 52 | 6 | 0 | 7.974034  | 1.098211  | 0.975254  |
| 53 | 1 | 0 | 7.951802  | 1.978371  | 0.319558  |
| 54 | 1 | 0 | 7.951650  | 1.468540  | 2.005933  |
| 55 | 6 | 0 | 4.716459  | -0.808683 | -1.799406 |
| 56 | 1 | 0 | 4.857449  | 0.080732  | -2.433789 |
| 57 | 7 | 0 | -5.544633 | 1.124480  | -0.892782 |
| 58 | 7 | 0 | -5.544633 | -1.124480 | 0.892782  |
| 59 | 7 | 0 | -1.124480 | -0.892782 | 5.544633  |
| 60 | 7 | 0 | 1.124480  | 0.892782  | 5.544633  |
| 61 | 6 | 0 | -3.196024 | 2.733540  | -1.307424 |
| 62 | 1 | 0 | -3.830363 | 2.972625  | -0.457586 |
| 63 | 6 | 0 | -3.521623 | 1.621649  | -2.095952 |
| 64 | 6 | 0 | -4.716459 | 0.808683  | -1.799406 |
| 65 | 1 | 0 | -4.857449 | -0.080732 | -2.433789 |
| 66 | 6 | 0 | -6.706676 | 0.276443  | -0.716665 |
| 67 | 1 | 0 | -6.684206 | -0.588657 | -1.403934 |
| 68 | 6 | 0 | -6.706676 | -0.276443 | 0.716665  |
| 69 | 1 | 0 | -6.684206 | 0.588657  | 1.403934  |
| 70 | 6 | 0 | -7.974034 | -1.098211 | 0.975254  |
| 71 | 1 | 0 | -7.951650 | -1.468540 | 2.005933  |
| 72 | 1 | 0 | -7.951802 | -1.978371 | 0.319558  |
| 73 | 6 | 0 | -9.237465 | -0.277856 | 0.712655  |

|     |   |   |            |           |            |
|-----|---|---|------------|-----------|------------|
| 74  | 1 | 0 | -10.126359 | -0.893631 | 0.885575   |
| 75  | 1 | 0 | -9.285138  | 0.556828  | 1.425277   |
| 76  | 6 | 0 | -9.237465  | 0.277856  | -0.712655  |
| 77  | 1 | 0 | -10.126359 | 0.893631  | -0.885575  |
| 78  | 1 | 0 | -9.285138  | -0.556828 | -1.425277  |
| 79  | 6 | 0 | -7.974034  | 1.098211  | -0.975254  |
| 80  | 1 | 0 | -7.951802  | 1.978371  | -0.319558  |
| 81  | 1 | 0 | -7.951650  | 1.468540  | -2.005933  |
| 82  | 6 | 0 | -4.716459  | -0.808683 | 1.799406   |
| 83  | 1 | 0 | -4.857449  | 0.080732  | 2.433789   |
| 84  | 6 | 0 | -3.521623  | -1.621649 | 2.095952   |
| 85  | 6 | 0 | -3.196024  | -2.733540 | 1.307424   |
| 86  | 1 | 0 | -3.830363  | -2.972625 | 0.457586   |
| 87  | 6 | 0 | -2.095952  | -3.521623 | 1.621649   |
| 88  | 6 | 0 | -1.307424  | -3.196024 | 2.733540   |
| 89  | 1 | 0 | -0.457586  | -3.830363 | 2.972625   |
| 90  | 6 | 0 | -1.621649  | -2.095952 | 3.521623   |
| 91  | 6 | 0 | -2.733540  | -1.307424 | 3.196024   |
| 92  | 1 | 0 | -2.972625  | -0.457586 | 3.830363   |
| 93  | 6 | 0 | -0.808683  | -1.799406 | 4.716459   |
| 94  | 1 | 0 | 0.080732   | -2.433789 | 4.857449   |
| 95  | 6 | 0 | -0.276443  | -0.716665 | 6.706676   |
| 96  | 1 | 0 | 0.588657   | -1.403934 | 6.684206   |
| 97  | 6 | 0 | 0.276443   | 0.716665  | 6.706676   |
| 98  | 1 | 0 | -0.588657  | 1.403934  | 6.684206   |
| 99  | 6 | 0 | 1.098211   | 0.975254  | 7.974034   |
| 100 | 1 | 0 | 1.468540   | 2.005933  | 7.951650   |
| 101 | 1 | 0 | 1.978371   | 0.319558  | 7.951802   |
| 102 | 6 | 0 | 0.277856   | 0.712655  | 9.237465   |
| 103 | 1 | 0 | -0.556828  | 1.425277  | 9.285138   |
| 104 | 1 | 0 | 0.893631   | 0.885575  | 10.126359  |
| 105 | 6 | 0 | -0.277856  | -0.712655 | 9.237465   |
| 106 | 1 | 0 | 0.556828   | -1.425277 | 9.285138   |
| 107 | 1 | 0 | -0.893631  | -0.885575 | 10.126359  |
| 108 | 6 | 0 | -1.098211  | -0.975254 | 7.974034   |
| 109 | 1 | 0 | -1.978371  | -0.319558 | 7.951802   |
| 110 | 1 | 0 | -1.468540  | -2.005933 | 7.951650   |
| 111 | 6 | 0 | 0.808683   | 1.799406  | 4.716459   |
| 112 | 1 | 0 | -0.080732  | 2.433789  | 4.857449   |
| 113 | 7 | 0 | -1.124480  | 0.892782  | -5.544633  |
| 114 | 7 | 0 | 1.124480   | -0.892782 | -5.544633  |
| 115 | 7 | 0 | 0.892782   | -5.544633 | -1.124480  |
| 116 | 7 | 0 | -0.892782  | -5.544633 | 1.124480   |
| 117 | 6 | 0 | -2.733540  | 1.307424  | -3.196024  |
| 118 | 1 | 0 | -2.972625  | 0.457586  | -3.830363  |
| 119 | 6 | 0 | -1.621649  | 2.095952  | -3.521623  |
| 120 | 6 | 0 | -0.808683  | 1.799406  | -4.716459  |
| 121 | 1 | 0 | 0.080732   | 2.433789  | -4.857449  |
| 122 | 6 | 0 | -0.276443  | 0.716665  | -6.706676  |
| 123 | 1 | 0 | 0.588657   | 1.403934  | -6.684206  |
| 124 | 6 | 0 | 0.276443   | -0.716665 | -6.706676  |
| 125 | 1 | 0 | -0.588657  | -1.403934 | -6.684206  |
| 126 | 6 | 0 | 1.098211   | -0.975254 | -7.974034  |
| 127 | 1 | 0 | 1.468540   | -2.005933 | -7.951650  |
| 128 | 1 | 0 | 1.978371   | -0.319558 | -7.951802  |
| 129 | 6 | 0 | 0.277856   | -0.712655 | -9.237465  |
| 130 | 1 | 0 | 0.893631   | -0.885575 | -10.126359 |
| 131 | 1 | 0 | -0.556828  | -1.425277 | -9.285138  |
| 132 | 6 | 0 | -0.277856  | 0.712655  | -9.237465  |

|     |   |   |           |            |            |
|-----|---|---|-----------|------------|------------|
| 133 | 1 | 0 | -0.893631 | 0.885575   | -10.126359 |
| 134 | 1 | 0 | 0.556828  | 1.425277   | -9.285138  |
| 135 | 6 | 0 | -1.098211 | 0.975254   | -7.974034  |
| 136 | 1 | 0 | -1.978371 | 0.319558   | -7.951802  |
| 137 | 1 | 0 | -1.468540 | 2.005933   | -7.951650  |
| 138 | 6 | 0 | 0.808683  | -1.799406  | -4.716459  |
| 139 | 1 | 0 | -0.080732 | -2.433789  | -4.857449  |
| 140 | 6 | 0 | 1.621649  | -2.095952  | -3.521623  |
| 141 | 6 | 0 | 2.733540  | -1.307424  | -3.196024  |
| 142 | 1 | 0 | 2.972625  | -0.457586  | -3.830363  |
| 143 | 6 | 0 | 3.521623  | -1.621649  | -2.095952  |
| 144 | 6 | 0 | 3.196024  | -2.733540  | -1.307424  |
| 145 | 1 | 0 | 3.830363  | -2.972625  | -0.457586  |
| 146 | 6 | 0 | 2.095952  | -3.521623  | -1.621649  |
| 147 | 6 | 0 | 1.307424  | -3.196024  | -2.733540  |
| 148 | 1 | 0 | 0.457586  | -3.830363  | -2.972625  |
| 149 | 6 | 0 | 1.799406  | -4.716459  | -0.808683  |
| 150 | 1 | 0 | 2.433789  | -4.857449  | 0.080732   |
| 151 | 6 | 0 | 0.716665  | -6.706676  | -0.276443  |
| 152 | 1 | 0 | 1.403934  | -6.684206  | 0.588657   |
| 153 | 6 | 0 | -0.716665 | -6.706676  | 0.276443   |
| 154 | 1 | 0 | -1.403934 | -6.684206  | -0.588657  |
| 155 | 6 | 0 | -0.975254 | -7.974034  | 1.098211   |
| 156 | 1 | 0 | -2.005933 | -7.951650  | 1.468540   |
| 157 | 1 | 0 | -0.319558 | -7.951802  | 1.978371   |
| 158 | 6 | 0 | -0.712655 | -9.237465  | 0.277856   |
| 159 | 1 | 0 | -1.425277 | -9.285138  | -0.556828  |
| 160 | 1 | 0 | -0.885575 | -10.126359 | 0.893631   |
| 161 | 6 | 0 | 0.712655  | -9.237465  | -0.277856  |
| 162 | 1 | 0 | 1.425277  | -9.285138  | 0.556828   |
| 163 | 1 | 0 | 0.885575  | -10.126359 | -0.893631  |
| 164 | 6 | 0 | 0.975254  | -7.974034  | -1.098211  |
| 165 | 1 | 0 | 0.319558  | -7.951802  | -1.978371  |
| 166 | 1 | 0 | 2.005933  | -7.951650  | -1.468540  |
| 167 | 6 | 0 | -1.799406 | -4.716459  | 0.808683   |
| 168 | 1 | 0 | -2.433789 | -4.857449  | -0.080732  |
| 169 | 6 | 0 | -1.603280 | 1.603280   | 1.603280   |
| 170 | 6 | 0 | -1.603280 | -1.603280  | -1.603280  |
| 171 | 6 | 0 | 1.603280  | 1.603280   | -1.603280  |
| 172 | 1 | 0 | -2.653024 | 1.402186   | 1.373338   |
| 173 | 1 | 0 | -2.653024 | -1.402186  | -1.373338  |
| 174 | 1 | 0 | 1.402186  | 1.373338   | -2.653024  |
| 175 | 1 | 0 | 1.373338  | 2.653024   | -1.402186  |
| 176 | 1 | 0 | 2.653024  | 1.402186   | -1.373338  |
| 177 | 1 | 0 | -1.402186 | 1.373338   | 2.653024   |
| 178 | 1 | 0 | -1.373338 | 2.653024   | 1.402186   |
| 179 | 1 | 0 | -1.402186 | -1.373338  | -2.653024  |
| 180 | 1 | 0 | -1.373338 | -2.653024  | -1.402186  |
| 181 | 6 | 0 | 1.603280  | -1.603280  | 1.603280   |
| 182 | 1 | 0 | 1.373338  | -2.653024  | 1.402186   |
| 183 | 1 | 0 | 2.653024  | -1.402186  | 1.373338   |
| 184 | 1 | 0 | 1.402186  | -1.373338  | 2.653024   |
| 185 | 1 | 0 | 0.973148  | -0.973148  | 0.973148   |
| 186 | 1 | 0 | -0.973148 | 0.973148   | 0.973148   |
| 187 | 1 | 0 | 0.973148  | 0.973148   | -0.973148  |
| 188 | 1 | 0 | -0.973148 | -0.973148  | -0.973148  |

4CH4@CC3-b T cc3-rb

## Standard orientation:

| Center<br>Number | Atomic<br>Number | Atomic<br>Type | Coordinates (Angstroms) |           |           |
|------------------|------------------|----------------|-------------------------|-----------|-----------|
|                  |                  |                | X                       | Y         | Z         |
| 1                | 7                | 0              | -1.116297               | -0.906117 | 5.543108  |
| 2                | 7                | 0              | 1.116297                | 0.906117  | 5.543108  |
| 3                | 7                | 0              | 0.906117                | 5.543108  | 1.116297  |
| 4                | 7                | 0              | -0.906117               | 5.543108  | -1.116297 |
| 5                | 6                | 0              | -2.718410               | -1.299175 | 3.191020  |
| 6                | 1                | 0              | -2.947619               | -0.445446 | 3.824076  |
| 7                | 6                | 0              | -1.608429               | -2.092535 | 3.511448  |
| 8                | 6                | 0              | -0.787543               | -1.795511 | 4.701473  |
| 9                | 1                | 0              | 0.117296                | -2.411270 | 4.824516  |
| 10               | 6                | 0              | -0.265621               | -0.720839 | 6.701447  |
| 11               | 1                | 0              | 0.609499                | -1.395069 | 6.674362  |
| 12               | 6                | 0              | 0.265621                | 0.720839  | 6.701447  |
| 13               | 1                | 0              | -0.609499               | 1.395069  | 6.674362  |
| 14               | 6                | 0              | 1.080490                | 0.994578  | 7.970221  |
| 15               | 1                | 0              | 1.432968                | 2.031466  | 7.947499  |
| 16               | 1                | 0              | 1.971906                | 0.354268  | 7.949066  |
| 17               | 6                | 0              | 0.264189                | 0.717983  | 9.233139  |
| 18               | 1                | 0              | 0.875995                | 0.903205  | 10.122307 |
| 19               | 1                | 0              | -0.583946               | 1.414636  | 9.279713  |
| 20               | 6                | 0              | -0.264189               | -0.717983 | 9.233139  |
| 21               | 1                | 0              | -0.875995               | -0.903205 | 10.122307 |
| 22               | 1                | 0              | 0.583946                | -1.414636 | 9.279713  |
| 23               | 6                | 0              | -1.080490               | -0.994578 | 7.970221  |
| 24               | 1                | 0              | -1.971906               | -0.354268 | 7.949066  |
| 25               | 1                | 0              | -1.432968               | -2.031466 | 7.947499  |
| 26               | 6                | 0              | 0.787543                | 1.795511  | 4.701473  |
| 27               | 1                | 0              | -0.117296               | 2.411270  | 4.824516  |
| 28               | 6                | 0              | 1.608429                | 2.092535  | 3.511448  |
| 29               | 6                | 0              | 2.718410                | 1.299175  | 3.191020  |
| 30               | 1                | 0              | 2.947619                | 0.445446  | 3.824076  |
| 31               | 6                | 0              | 3.511448                | 1.608429  | 2.092535  |
| 32               | 6                | 0              | 3.191020                | 2.718410  | 1.299175  |
| 33               | 1                | 0              | 3.824076                | 2.947619  | 0.445446  |
| 34               | 6                | 0              | 2.092535                | 3.511448  | 1.608429  |
| 35               | 6                | 0              | 1.299175                | 3.191020  | 2.718410  |
| 36               | 1                | 0              | 0.445446                | 3.824076  | 2.947619  |
| 37               | 6                | 0              | 1.795511                | 4.701473  | 0.787543  |
| 38               | 1                | 0              | 2.411270                | 4.824516  | -0.117296 |
| 39               | 6                | 0              | 0.720839                | 6.701447  | 0.265621  |
| 40               | 1                | 0              | 1.395069                | 6.674362  | -0.609499 |
| 41               | 6                | 0              | -0.720839               | 6.701447  | -0.265621 |
| 42               | 1                | 0              | -1.395069               | 6.674362  | 0.609499  |
| 43               | 6                | 0              | -0.994578               | 7.970221  | -1.080490 |
| 44               | 1                | 0              | -2.031466               | 7.947499  | -1.432968 |
| 45               | 1                | 0              | -0.354268               | 7.949066  | -1.971906 |
| 46               | 6                | 0              | -0.717983               | 9.233139  | -0.264189 |
| 47               | 1                | 0              | -1.414636               | 9.279713  | 0.583946  |
| 48               | 1                | 0              | -0.903205               | 10.122307 | -0.875995 |
| 49               | 6                | 0              | 0.717983                | 9.233139  | 0.264189  |
| 50               | 1                | 0              | 1.414636                | 9.279713  | -0.583946 |
| 51               | 1                | 0              | 0.903205                | 10.122307 | 0.875995  |
| 52               | 6                | 0              | 0.994578                | 7.970221  | 1.080490  |
| 53               | 1                | 0              | 0.354268                | 7.949066  | 1.971906  |
| 54               | 1                | 0              | 2.031466                | 7.947499  | 1.432968  |



|     |   |   |           |            |           |
|-----|---|---|-----------|------------|-----------|
| 55  | 6 | 0 | -1.795511 | 4.701473   | -0.787543 |
| 56  | 1 | 0 | -2.411270 | 4.824516   | 0.117296  |
| 57  | 7 | 0 | -0.906117 | -5.543108  | 1.116297  |
| 58  | 7 | 0 | 0.906117  | -5.543108  | -1.116297 |
| 59  | 7 | 0 | 5.543108  | -1.116297  | -0.906117 |
| 60  | 7 | 0 | 5.543108  | 1.116297   | 0.906117  |
| 61  | 6 | 0 | -1.299175 | -3.191020  | 2.718410  |
| 62  | 1 | 0 | -0.445446 | -3.824076  | 2.947619  |
| 63  | 6 | 0 | -2.092535 | -3.511448  | 1.608429  |
| 64  | 6 | 0 | -1.795511 | -4.701473  | 0.787543  |
| 65  | 1 | 0 | -2.411270 | -4.824516  | -0.117296 |
| 66  | 6 | 0 | -0.720839 | -6.701447  | 0.265621  |
| 67  | 1 | 0 | -1.395069 | -6.674362  | -0.609499 |
| 68  | 6 | 0 | 0.720839  | -6.701447  | -0.265621 |
| 69  | 1 | 0 | 1.395069  | -6.674362  | 0.609499  |
| 70  | 6 | 0 | 0.994578  | -7.970221  | -1.080490 |
| 71  | 1 | 0 | 2.031466  | -7.947499  | -1.432968 |
| 72  | 1 | 0 | 0.354268  | -7.949066  | -1.971906 |
| 73  | 6 | 0 | 0.717983  | -9.233139  | -0.264189 |
| 74  | 1 | 0 | 0.903205  | -10.122307 | -0.875995 |
| 75  | 1 | 0 | 1.414636  | -9.279713  | 0.583946  |
| 76  | 6 | 0 | -0.717983 | -9.233139  | 0.264189  |
| 77  | 1 | 0 | -0.903205 | -10.122307 | 0.875995  |
| 78  | 1 | 0 | -1.414636 | -9.279713  | -0.583946 |
| 79  | 6 | 0 | -0.994578 | -7.970221  | 1.080490  |
| 80  | 1 | 0 | -0.354268 | -7.949066  | 1.971906  |
| 81  | 1 | 0 | -2.031466 | -7.947499  | 1.432968  |
| 82  | 6 | 0 | 1.795511  | -4.701473  | -0.787543 |
| 83  | 1 | 0 | 2.411270  | -4.824516  | 0.117296  |
| 84  | 6 | 0 | 2.092535  | -3.511448  | -1.608429 |
| 85  | 6 | 0 | 1.299175  | -3.191020  | -2.718410 |
| 86  | 1 | 0 | 0.445446  | -3.824076  | -2.947619 |
| 87  | 6 | 0 | 1.608429  | -2.092535  | -3.511448 |
| 88  | 6 | 0 | 2.718410  | -1.299175  | -3.191020 |
| 89  | 1 | 0 | 2.947619  | -0.445446  | -3.824076 |
| 90  | 6 | 0 | 3.511448  | -1.608429  | -2.092535 |
| 91  | 6 | 0 | 3.191020  | -2.718410  | -1.299175 |
| 92  | 1 | 0 | 3.824076  | -2.947619  | -0.445446 |
| 93  | 6 | 0 | 4.701473  | -0.787543  | -1.795511 |
| 94  | 1 | 0 | 4.824516  | 0.117296   | -2.411270 |
| 95  | 6 | 0 | 6.701447  | -0.265621  | -0.720839 |
| 96  | 1 | 0 | 6.674362  | 0.609499   | -1.395069 |
| 97  | 6 | 0 | 6.701447  | 0.265621   | 0.720839  |
| 98  | 1 | 0 | 6.674362  | -0.609499  | 1.395069  |
| 99  | 6 | 0 | 7.970221  | 1.080490   | 0.994578  |
| 100 | 1 | 0 | 7.947499  | 1.432968   | 2.031466  |
| 101 | 1 | 0 | 7.949066  | 1.971906   | 0.354268  |
| 102 | 6 | 0 | 9.233139  | 0.264189   | 0.717983  |
| 103 | 1 | 0 | 9.279713  | -0.583946  | 1.414636  |
| 104 | 1 | 0 | 10.122307 | 0.875995   | 0.903205  |
| 105 | 6 | 0 | 9.233139  | -0.264189  | -0.717983 |
| 106 | 1 | 0 | 9.279713  | 0.583946   | -1.414636 |
| 107 | 1 | 0 | 10.122307 | -0.875995  | -0.903205 |
| 108 | 6 | 0 | 7.970221  | -1.080490  | -0.994578 |
| 109 | 1 | 0 | 7.949066  | -1.971906  | -0.354268 |
| 110 | 1 | 0 | 7.947499  | -1.432968  | -2.031466 |
| 111 | 6 | 0 | 4.701473  | 0.787543   | 1.795511  |
| 112 | 1 | 0 | 4.824516  | -0.117296  | 2.411270  |
| 113 | 7 | 0 | -5.543108 | -1.116297  | 0.906117  |

|     |   |   |            |           |            |
|-----|---|---|------------|-----------|------------|
| 114 | 7 | 0 | -5.543108  | 1.116297  | -0.906117  |
| 115 | 7 | 0 | -1.116297  | 0.906117  | -5.543108  |
| 116 | 7 | 0 | 1.116297   | -0.906117 | -5.543108  |
| 117 | 6 | 0 | -3.191020  | -2.718410 | 1.299175   |
| 118 | 1 | 0 | -3.824076  | -2.947619 | 0.445446   |
| 119 | 6 | 0 | -3.511448  | -1.608429 | 2.092535   |
| 120 | 6 | 0 | -4.701473  | -0.787543 | 1.795511   |
| 121 | 1 | 0 | -4.824516  | 0.117296  | 2.411270   |
| 122 | 6 | 0 | -6.701447  | -0.265621 | 0.720839   |
| 123 | 1 | 0 | -6.674362  | 0.609499  | 1.395069   |
| 124 | 6 | 0 | -6.701447  | 0.265621  | -0.720839  |
| 125 | 1 | 0 | -6.674362  | -0.609499 | -1.395069  |
| 126 | 6 | 0 | -7.970221  | 1.080490  | -0.994578  |
| 127 | 1 | 0 | -7.947499  | 1.432968  | -2.031466  |
| 128 | 1 | 0 | -7.949066  | 1.971906  | -0.354268  |
| 129 | 6 | 0 | -9.233139  | 0.264189  | -0.717983  |
| 130 | 1 | 0 | -10.122307 | 0.875995  | -0.903205  |
| 131 | 1 | 0 | -9.279713  | -0.583946 | -1.414636  |
| 132 | 6 | 0 | -9.233139  | -0.264189 | 0.717983   |
| 133 | 1 | 0 | -10.122307 | -0.875995 | 0.903205   |
| 134 | 1 | 0 | -9.279713  | 0.583946  | 1.414636   |
| 135 | 6 | 0 | -7.970221  | -1.080490 | 0.994578   |
| 136 | 1 | 0 | -7.949066  | -1.971906 | 0.354268   |
| 137 | 1 | 0 | -7.947499  | -1.432968 | 2.031466   |
| 138 | 6 | 0 | -4.701473  | 0.787543  | -1.795511  |
| 139 | 1 | 0 | -4.824516  | -0.117296 | -2.411270  |
| 140 | 6 | 0 | -3.511448  | 1.608429  | -2.092535  |
| 141 | 6 | 0 | -3.191020  | 2.718410  | -1.299175  |
| 142 | 1 | 0 | -3.824076  | 2.947619  | -0.445446  |
| 143 | 6 | 0 | -2.092535  | 3.511448  | -1.608429  |
| 144 | 6 | 0 | -1.299175  | 3.191020  | -2.718410  |
| 145 | 1 | 0 | -0.445446  | 3.824076  | -2.947619  |
| 146 | 6 | 0 | -1.608429  | 2.092535  | -3.511448  |
| 147 | 6 | 0 | -2.718410  | 1.299175  | -3.191020  |
| 148 | 1 | 0 | -2.947619  | 0.445446  | -3.824076  |
| 149 | 6 | 0 | -0.787543  | 1.795511  | -4.701473  |
| 150 | 1 | 0 | 0.117296   | 2.411270  | -4.824516  |
| 151 | 6 | 0 | -0.265621  | 0.720839  | -6.701447  |
| 152 | 1 | 0 | 0.609499   | 1.395069  | -6.674362  |
| 153 | 6 | 0 | 0.265621   | -0.720839 | -6.701447  |
| 154 | 1 | 0 | -0.609499  | -1.395069 | -6.674362  |
| 155 | 6 | 0 | 1.080490   | -0.994578 | -7.970221  |
| 156 | 1 | 0 | 1.432968   | -2.031466 | -7.947499  |
| 157 | 1 | 0 | 1.971906   | -0.354268 | -7.949066  |
| 158 | 6 | 0 | 0.264189   | -0.717983 | -9.233139  |
| 159 | 1 | 0 | -0.583946  | -1.414636 | -9.279713  |
| 160 | 1 | 0 | 0.875995   | -0.903205 | -10.122307 |
| 161 | 6 | 0 | -0.264189  | 0.717983  | -9.233139  |
| 162 | 1 | 0 | 0.583946   | 1.414636  | -9.279713  |
| 163 | 1 | 0 | -0.875995  | 0.903205  | -10.122307 |
| 164 | 6 | 0 | -1.080490  | 0.994578  | -7.970221  |
| 165 | 1 | 0 | -1.971906  | 0.354268  | -7.949066  |
| 166 | 1 | 0 | -1.432968  | 2.031466  | -7.947499  |
| 167 | 6 | 0 | 0.787543   | -1.795511 | -4.701473  |
| 168 | 1 | 0 | -0.117296  | -2.411270 | -4.824516  |
| 169 | 6 | 0 | 1.598617   | -1.598617 | 1.598617   |
| 170 | 6 | 0 | -1.598617  | -1.598617 | -1.598617  |
| 171 | 6 | 0 | -1.598617  | 1.598617  | 1.598617   |
| 172 | 1 | 0 | 0.960047   | -2.229349 | 0.975003   |

|     |   |   |           |           |           |
|-----|---|---|-----------|-----------|-----------|
| 173 | 1 | 0 | -0.960047 | -2.229349 | -0.975003 |
| 174 | 1 | 0 | -2.229349 | 0.975003  | 0.960047  |
| 175 | 1 | 0 | -0.975003 | 0.960047  | 2.229349  |
| 176 | 1 | 0 | -0.960047 | 2.229349  | 0.975003  |
| 177 | 1 | 0 | 2.229349  | -0.975003 | 0.960047  |
| 178 | 1 | 0 | 0.975003  | -0.960047 | 2.229349  |
| 179 | 1 | 0 | -2.229349 | -0.975003 | -0.960047 |
| 180 | 1 | 0 | -0.975003 | -0.960047 | -2.229349 |
| 181 | 6 | 0 | 1.598617  | 1.598617  | -1.598617 |
| 182 | 1 | 0 | 0.975003  | 0.960047  | -2.229349 |
| 183 | 1 | 0 | 0.960047  | 2.229349  | -0.975003 |
| 184 | 1 | 0 | 2.229349  | 0.975003  | -0.960047 |
| 185 | 1 | 0 | -2.230056 | 2.230056  | 2.230056  |
| 186 | 1 | 0 | 2.230056  | -2.230056 | 2.230056  |
| 187 | 1 | 0 | -2.230056 | -2.230056 | -2.230056 |
| 188 | 1 | 0 | 2.230056  | 2.230056  | -2.230056 |

5CH4@CC3 T cc3-raaq

Standard orientation:

| Center<br>Number | Atomic<br>Number | Atomic<br>Type | Coordinates (Angstroms) |           |           |
|------------------|------------------|----------------|-------------------------|-----------|-----------|
|                  |                  |                | X                       | Y         | Z         |
| 1                | 7                | 0              | 0.899886                | 5.537063  | 1.115772  |
| 2                | 7                | 0              | -0.899886               | 5.537063  | -1.115772 |
| 3                | 7                | 0              | -5.537063               | 1.115772  | -0.899886 |
| 4                | 7                | 0              | -5.537063               | -1.115772 | 0.899886  |
| 5                | 6                | 0              | 1.279106                | 3.170143  | 2.700687  |
| 6                | 1                | 0              | 0.429167                | 3.805919  | 2.936221  |
| 7                | 6                | 0              | 2.071323                | 3.492546  | 1.590422  |
| 8                | 6                | 0              | 1.781669                | 4.690620  | 0.778890  |
| 9                | 1                | 0              | 2.397172                | 4.815649  | -0.125905 |
| 10               | 6                | 0              | 0.719640                | 6.699166  | 0.269339  |
| 11               | 1                | 0              | 1.397961                | 6.674746  | -0.602677 |
| 12               | 6                | 0              | -0.719640               | 6.699166  | -0.269339 |
| 13               | 1                | 0              | -1.397961               | 6.674746  | 0.602677  |
| 14               | 6                | 0              | -0.987256               | 7.966545  | -1.087767 |
| 15               | 1                | 0              | -2.021720               | 7.944319  | -1.447327 |
| 16               | 1                | 0              | -0.340762               | 7.944489  | -1.974674 |
| 17               | 6                | 0              | -0.715824               | 9.229694  | -0.269853 |
| 18               | 1                | 0              | -0.895809               | 10.118787 | -0.883304 |
| 19               | 1                | 0              | -1.419031               | 9.276950  | 0.572820  |
| 20               | 6                | 0              | 0.715824                | 9.229694  | 0.269853  |
| 21               | 1                | 0              | 0.895809                | 10.118787 | 0.883304  |
| 22               | 1                | 0              | 1.419031                | 9.276950  | -0.572820 |
| 23               | 6                | 0              | 0.987256                | 7.966545  | 1.087767  |
| 24               | 1                | 0              | 0.340762                | 7.944489  | 1.974674  |
| 25               | 1                | 0              | 2.021720                | 7.944319  | 1.447327  |
| 26               | 6                | 0              | -1.781669               | 4.690620  | -0.778890 |
| 27               | 1                | 0              | -2.397172               | 4.815649  | 0.125905  |
| 28               | 6                | 0              | -2.071323               | 3.492546  | -1.590422 |
| 29               | 6                | 0              | -1.279106               | 3.170143  | -2.700687 |
| 30               | 1                | 0              | -0.429167               | 3.805919  | -2.936221 |
| 31               | 6                | 0              | -1.590422               | 2.071323  | -3.492546 |
| 32               | 6                | 0              | -2.700687               | 1.279106  | -3.170143 |
| 33               | 1                | 0              | -2.936221               | 0.429167  | -3.805919 |
| 34               | 6                | 0              | -3.492546               | 1.590422  | -2.071323 |
| 35               | 6                | 0              | -3.170143               | 2.700687  | -1.279106 |

|    |   |   |            |           |           |
|----|---|---|------------|-----------|-----------|
| 36 | 1 | 0 | -3.805919  | 2.936221  | -0.429167 |
| 37 | 6 | 0 | -4.690620  | 0.778890  | -1.781669 |
| 38 | 1 | 0 | -4.815649  | -0.125905 | -2.397172 |
| 39 | 6 | 0 | -6.699166  | 0.269339  | -0.719640 |
| 40 | 1 | 0 | -6.674746  | -0.602677 | -1.397961 |
| 41 | 6 | 0 | -6.699166  | -0.269339 | 0.719640  |
| 42 | 1 | 0 | -6.674746  | 0.602677  | 1.397961  |
| 43 | 6 | 0 | -7.966545  | -1.087767 | 0.987256  |
| 44 | 1 | 0 | -7.944319  | -1.447327 | 2.021720  |
| 45 | 1 | 0 | -7.944489  | -1.974674 | 0.340762  |
| 46 | 6 | 0 | -9.229694  | -0.269853 | 0.715824  |
| 47 | 1 | 0 | -9.276950  | 0.572820  | 1.419031  |
| 48 | 1 | 0 | -10.118787 | -0.883304 | 0.895809  |
| 49 | 6 | 0 | -9.229694  | 0.269853  | -0.715824 |
| 50 | 1 | 0 | -9.276950  | -0.572820 | -1.419031 |
| 51 | 1 | 0 | -10.118787 | 0.883304  | -0.895809 |
| 52 | 6 | 0 | -7.966545  | 1.087767  | -0.987256 |
| 53 | 1 | 0 | -7.944489  | 1.974674  | -0.340762 |
| 54 | 1 | 0 | -7.944319  | 1.447327  | -2.021720 |
| 55 | 6 | 0 | -4.690620  | -0.778890 | 1.781669  |
| 56 | 1 | 0 | -4.815649  | 0.125905  | 2.397172  |
| 57 | 7 | 0 | 5.537063   | 1.115772  | 0.899886  |
| 58 | 7 | 0 | 5.537063   | -1.115772 | -0.899886 |
| 59 | 7 | 0 | 1.115772   | -0.899886 | -5.537063 |
| 60 | 7 | 0 | -1.115772  | 0.899886  | -5.537063 |
| 61 | 6 | 0 | 3.170143   | 2.700687  | 1.279106  |
| 62 | 1 | 0 | 3.805919   | 2.936221  | 0.429167  |
| 63 | 6 | 0 | 3.492546   | 1.590422  | 2.071323  |
| 64 | 6 | 0 | 4.690620   | 0.778890  | 1.781669  |
| 65 | 1 | 0 | 4.815649   | -0.125905 | 2.397172  |
| 66 | 6 | 0 | 6.699166   | 0.269339  | 0.719640  |
| 67 | 1 | 0 | 6.674746   | -0.602677 | 1.397961  |
| 68 | 6 | 0 | 6.699166   | -0.269339 | -0.719640 |
| 69 | 1 | 0 | 6.674746   | 0.602677  | -1.397961 |
| 70 | 6 | 0 | 7.966545   | -1.087767 | -0.987256 |
| 71 | 1 | 0 | 7.944319   | -1.447327 | -2.021720 |
| 72 | 1 | 0 | 7.944489   | -1.974674 | -0.340762 |
| 73 | 6 | 0 | 9.229694   | -0.269853 | -0.715824 |
| 74 | 1 | 0 | 10.118787  | -0.883304 | -0.895809 |
| 75 | 1 | 0 | 9.276950   | 0.572820  | -1.419031 |
| 76 | 6 | 0 | 9.229694   | 0.269853  | 0.715824  |
| 77 | 1 | 0 | 10.118787  | 0.883304  | 0.895809  |
| 78 | 1 | 0 | 9.276950   | -0.572820 | 1.419031  |
| 79 | 6 | 0 | 7.966545   | 1.087767  | 0.987256  |
| 80 | 1 | 0 | 7.944489   | 1.974674  | 0.340762  |
| 81 | 1 | 0 | 7.944319   | 1.447327  | 2.021720  |
| 82 | 6 | 0 | 4.690620   | -0.778890 | -1.781669 |
| 83 | 1 | 0 | 4.815649   | 0.125905  | -2.397172 |
| 84 | 6 | 0 | 3.492546   | -1.590422 | -2.071323 |
| 85 | 6 | 0 | 3.170143   | -2.700687 | -1.279106 |
| 86 | 1 | 0 | 3.805919   | -2.936221 | -0.429167 |
| 87 | 6 | 0 | 2.071323   | -3.492546 | -1.590422 |
| 88 | 6 | 0 | 1.279106   | -3.170143 | -2.700687 |
| 89 | 1 | 0 | 0.429167   | -3.805919 | -2.936221 |
| 90 | 6 | 0 | 1.590422   | -2.071323 | -3.492546 |
| 91 | 6 | 0 | 2.700687   | -1.279106 | -3.170143 |
| 92 | 1 | 0 | 2.936221   | -0.429167 | -3.805919 |
| 93 | 6 | 0 | 0.778890   | -1.781669 | -4.690620 |
| 94 | 1 | 0 | -0.125905  | -2.397172 | -4.815649 |

|     |   |   |           |           |            |
|-----|---|---|-----------|-----------|------------|
| 95  | 6 | 0 | 0.269339  | -0.719640 | -6.699166  |
| 96  | 1 | 0 | -0.602677 | -1.397961 | -6.674746  |
| 97  | 6 | 0 | -0.269339 | 0.719640  | -6.699166  |
| 98  | 1 | 0 | 0.602677  | 1.397961  | -6.674746  |
| 99  | 6 | 0 | -1.087767 | 0.987256  | -7.966545  |
| 100 | 1 | 0 | -1.447327 | 2.021720  | -7.944319  |
| 101 | 1 | 0 | -1.974674 | 0.340762  | -7.944489  |
| 102 | 6 | 0 | -0.269853 | 0.715824  | -9.229694  |
| 103 | 1 | 0 | 0.572820  | 1.419031  | -9.276950  |
| 104 | 1 | 0 | -0.883304 | 0.895809  | -10.118787 |
| 105 | 6 | 0 | 0.269853  | -0.715824 | -9.229694  |
| 106 | 1 | 0 | -0.572820 | -1.419031 | -9.276950  |
| 107 | 1 | 0 | 0.883304  | -0.895809 | -10.118787 |
| 108 | 6 | 0 | 1.087767  | -0.987256 | -7.966545  |
| 109 | 1 | 0 | 1.974674  | -0.340762 | -7.944489  |
| 110 | 1 | 0 | 1.447327  | -2.021720 | -7.944319  |
| 111 | 6 | 0 | -0.778890 | 1.781669  | -4.690620  |
| 112 | 1 | 0 | 0.125905  | 2.397172  | -4.815649  |
| 113 | 7 | 0 | 1.115772  | 0.899886  | 5.537063   |
| 114 | 7 | 0 | -1.115772 | -0.899886 | 5.537063   |
| 115 | 7 | 0 | -0.899886 | -5.537063 | 1.115772   |
| 116 | 7 | 0 | 0.899886  | -5.537063 | -1.115772  |
| 117 | 6 | 0 | 2.700687  | 1.279106  | 3.170143   |
| 118 | 1 | 0 | 2.936221  | 0.429167  | 3.805919   |
| 119 | 6 | 0 | 1.590422  | 2.071323  | 3.492546   |
| 120 | 6 | 0 | 0.778890  | 1.781669  | 4.690620   |
| 121 | 1 | 0 | -0.125905 | 2.397172  | 4.815649   |
| 122 | 6 | 0 | 0.269339  | 0.719640  | 6.699166   |
| 123 | 1 | 0 | -0.602677 | 1.397961  | 6.674746   |
| 124 | 6 | 0 | -0.269339 | -0.719640 | 6.699166   |
| 125 | 1 | 0 | 0.602677  | -1.397961 | 6.674746   |
| 126 | 6 | 0 | -1.087767 | -0.987256 | 7.966545   |
| 127 | 1 | 0 | -1.447327 | -2.021720 | 7.944319   |
| 128 | 1 | 0 | -1.974674 | -0.340762 | 7.944489   |
| 129 | 6 | 0 | -0.269853 | -0.715824 | 9.229694   |
| 130 | 1 | 0 | -0.883304 | -0.895809 | 10.118787  |
| 131 | 1 | 0 | 0.572820  | -1.419031 | 9.276950   |
| 132 | 6 | 0 | 0.269853  | 0.715824  | 9.229694   |
| 133 | 1 | 0 | 0.883304  | 0.895809  | 10.118787  |
| 134 | 1 | 0 | -0.572820 | 1.419031  | 9.276950   |
| 135 | 6 | 0 | 1.087767  | 0.987256  | 7.966545   |
| 136 | 1 | 0 | 1.974674  | 0.340762  | 7.944489   |
| 137 | 1 | 0 | 1.447327  | 2.021720  | 7.944319   |
| 138 | 6 | 0 | -0.778890 | -1.781669 | 4.690620   |
| 139 | 1 | 0 | 0.125905  | -2.397172 | 4.815649   |
| 140 | 6 | 0 | -1.590422 | -2.071323 | 3.492546   |
| 141 | 6 | 0 | -2.700687 | -1.279106 | 3.170143   |
| 142 | 1 | 0 | -2.936221 | -0.429167 | 3.805919   |
| 143 | 6 | 0 | -3.492546 | -1.590422 | 2.071323   |
| 144 | 6 | 0 | -3.170143 | -2.700687 | 1.279106   |
| 145 | 1 | 0 | -3.805919 | -2.936221 | 0.429167   |
| 146 | 6 | 0 | -2.071323 | -3.492546 | 1.590422   |
| 147 | 6 | 0 | -1.279106 | -3.170143 | 2.700687   |
| 148 | 1 | 0 | -0.429167 | -3.805919 | 2.936221   |
| 149 | 6 | 0 | -1.781669 | -4.690620 | 0.778890   |
| 150 | 1 | 0 | -2.397172 | -4.815649 | -0.125905  |
| 151 | 6 | 0 | -0.719640 | -6.699166 | 0.269339   |
| 152 | 1 | 0 | -1.397961 | -6.674746 | -0.602677  |
| 153 | 6 | 0 | 0.719640  | -6.699166 | -0.269339  |

|     |   |   |           |            |           |
|-----|---|---|-----------|------------|-----------|
| 154 | 1 | 0 | 1.397961  | -6.674746  | 0.602677  |
| 155 | 6 | 0 | 0.987256  | -7.966545  | -1.087767 |
| 156 | 1 | 0 | 2.021720  | -7.944319  | -1.447327 |
| 157 | 1 | 0 | 0.340762  | -7.944489  | -1.974674 |
| 158 | 6 | 0 | 0.715824  | -9.229694  | -0.269853 |
| 159 | 1 | 0 | 1.419031  | -9.276950  | 0.572820  |
| 160 | 1 | 0 | 0.895809  | -10.118787 | -0.883304 |
| 161 | 6 | 0 | -0.715824 | -9.229694  | 0.269853  |
| 162 | 1 | 0 | -1.419031 | -9.276950  | -0.572820 |
| 163 | 1 | 0 | -0.895809 | -10.118787 | 0.883304  |
| 164 | 6 | 0 | -0.987256 | -7.966545  | 1.087767  |
| 165 | 1 | 0 | -0.340762 | -7.944489  | 1.974674  |
| 166 | 1 | 0 | -2.021720 | -7.944319  | 1.447327  |
| 167 | 6 | 0 | 1.781669  | -4.690620  | -0.778890 |
| 168 | 1 | 0 | 2.397172  | -4.815649  | 0.125905  |
| 169 | 6 | 0 | 1.892506  | 1.892506   | -1.892506 |
| 170 | 6 | 0 | 1.892506  | -1.892506  | 1.892506  |
| 171 | 6 | 0 | -1.892506 | 1.892506   | 1.892506  |
| 172 | 1 | 0 | 2.517944  | 1.264719   | -1.251726 |
| 173 | 1 | 0 | 2.517944  | -1.264719  | 1.251726  |
| 174 | 1 | 0 | -1.264719 | 1.251726   | 2.517944  |
| 175 | 1 | 0 | -1.251726 | 2.517944   | 1.264719  |
| 176 | 1 | 0 | -2.517944 | 1.264719   | 1.251726  |
| 177 | 1 | 0 | 1.264719  | 1.251726   | -2.517944 |
| 178 | 1 | 0 | 1.251726  | 2.517944   | -1.264719 |
| 179 | 1 | 0 | 1.264719  | -1.251726  | 2.517944  |
| 180 | 1 | 0 | 1.251726  | -2.517944  | 1.264719  |
| 181 | 6 | 0 | -1.892506 | -1.892506  | -1.892506 |
| 182 | 1 | 0 | -1.251726 | -2.517944  | -1.264719 |
| 183 | 1 | 0 | -2.517944 | -1.264719  | -1.251726 |
| 184 | 1 | 0 | -1.264719 | -1.251726  | -2.517944 |
| 185 | 1 | 0 | -2.523822 | 2.523822   | 2.523822  |
| 186 | 1 | 0 | 2.523822  | 2.523822   | -2.523822 |
| 187 | 1 | 0 | 2.523822  | -2.523822  | 2.523822  |
| 188 | 1 | 0 | -2.523822 | -2.523822  | -2.523822 |
| 189 | 6 | 0 | 0.000000  | 0.000000   | 0.000000  |
| 190 | 1 | 0 | 0.632198  | 0.632198   | 0.632198  |
| 191 | 1 | 0 | -0.632198 | 0.632198   | -0.632198 |
| 192 | 1 | 0 | 0.632198  | -0.632198  | -0.632198 |
| 193 | 1 | 0 | -0.632198 | -0.632198  | 0.632198  |

5CH4@CC3 C1 cc3-raarr

Standard orientation:

| Center<br>Number | Atomic<br>Number | Atomic<br>Type | Coordinates (Angstroms) |           |           |
|------------------|------------------|----------------|-------------------------|-----------|-----------|
|                  |                  |                | X                       | Y         | Z         |
| 1                | 7                | 0              | -3.880601               | 1.363265  | 3.973830  |
| 2                | 7                | 0              | -5.036700               | 2.255332  | 1.507378  |
| 3                | 7                | 0              | -4.215180               | -1.688315 | -3.481072 |
| 4                | 7                | 0              | -2.339543               | -3.855527 | -3.515186 |
| 5                | 6                | 0              | -1.682394               | -0.490285 | 3.984140  |
| 6                | 1                | 0              | -2.686855               | -0.898386 | 3.902881  |
| 7                | 6                | 0              | -1.521173               | 0.901894  | 3.981747  |
| 8                | 6                | 0              | -2.691379               | 1.798155  | 3.909150  |
| 9                | 1                | 0              | -2.465616               | 2.872517  | 3.820304  |
| 10               | 6                | 0              | -4.957254               | 2.332109  | 3.932188  |
| 11               | 1                | 0              | -4.571343               | 3.362573  | 3.830683  |

|    |   |   |           |           |           |
|----|---|---|-----------|-----------|-----------|
| 12 | 6 | 0 | -5.831390 | 2.046615  | 2.700891  |
| 13 | 1 | 0 | -6.178783 | 1.000494  | 2.778607  |
| 14 | 6 | 0 | -7.042243 | 2.984972  | 2.672552  |
| 15 | 1 | 0 | -7.651651 | 2.750572  | 1.793012  |
| 16 | 1 | 0 | -6.676818 | 4.011953  | 2.542854  |
| 17 | 6 | 0 | -7.865222 | 2.877068  | 3.956765  |
| 18 | 1 | 0 | -8.711496 | 3.571019  | 3.918514  |
| 19 | 1 | 0 | -8.286618 | 1.865663  | 4.036172  |
| 20 | 6 | 0 | -6.995802 | 3.156765  | 5.184045  |
| 21 | 1 | 0 | -7.580235 | 3.044366  | 6.103291  |
| 22 | 1 | 0 | -6.651021 | 4.199316  | 5.151867  |
| 23 | 6 | 0 | -5.785777 | 2.222498  | 5.216327  |
| 24 | 1 | 0 | -6.115104 | 1.180838  | 5.323738  |
| 25 | 1 | 0 | -5.140786 | 2.442411  | 6.073965  |
| 26 | 6 | 0 | -4.862302 | 1.266721  | 0.732912  |
| 27 | 1 | 0 | -5.290186 | 0.274411  | 0.945848  |
| 28 | 6 | 0 | -4.101953 | 1.379242  | -0.526929 |
| 29 | 6 | 0 | -3.418579 | 2.559486  | -0.849734 |
| 30 | 1 | 0 | -3.436600 | 3.382564  | -0.139583 |
| 31 | 6 | 0 | -2.751294 | 2.677361  | -2.063072 |
| 32 | 6 | 0 | -2.758138 | 1.603096  | -2.963112 |
| 33 | 1 | 0 | -2.240019 | 1.715658  | -3.912315 |
| 34 | 6 | 0 | -3.432909 | 0.428560  | -2.652433 |
| 35 | 6 | 0 | -4.102826 | 0.319701  | -1.426225 |
| 36 | 1 | 0 | -4.634441 | -0.602121 | -1.203244 |
| 37 | 6 | 0 | -3.478056 | -0.668753 | -3.638260 |
| 38 | 1 | 0 | -2.848875 | -0.534219 | -4.532202 |
| 39 | 6 | 0 | -4.213696 | -2.690772 | -4.527330 |
| 40 | 1 | 0 | -3.527421 | -2.417660 | -5.349233 |
| 41 | 6 | 0 | -3.716064 | -4.019566 | -3.936997 |
| 42 | 1 | 0 | -4.374005 | -4.268604 | -3.084834 |
| 43 | 6 | 0 | -3.794130 | -5.135410 | -4.984034 |
| 44 | 1 | 0 | -3.445451 | -6.070338 | -4.532100 |
| 45 | 1 | 0 | -3.095491 | -4.893393 | -5.795440 |
| 46 | 6 | 0 | -5.211609 | -5.286696 | -5.537081 |
| 47 | 1 | 0 | -5.886591 | -5.601648 | -4.729598 |
| 48 | 1 | 0 | -5.235225 | -6.075864 | -6.295937 |
| 49 | 6 | 0 | -5.710505 | -3.963879 | -6.121589 |
| 50 | 1 | 0 | -5.091769 | -3.696714 | -6.989120 |
| 51 | 1 | 0 | -6.738340 | -4.067168 | -6.485037 |
| 52 | 6 | 0 | -5.634088 | -2.846988 | -5.080030 |
| 53 | 1 | 0 | -6.306240 | -3.066434 | -4.240327 |
| 54 | 1 | 0 | -5.956563 | -1.889849 | -5.504067 |
| 55 | 6 | 0 | -2.073158 | -4.027680 | -2.287594 |
| 56 | 1 | 0 | -2.849843 | -4.289401 | -1.551801 |
| 57 | 7 | 0 | 2.413694  | 2.418610  | 4.585709  |
| 58 | 7 | 0 | 4.138413  | 3.129206  | 2.409524  |
| 59 | 7 | 0 | 1.154173  | 4.703666  | -3.042526 |
| 60 | 7 | 0 | -1.613520 | 4.171051  | -3.564339 |
| 61 | 6 | 0 | -0.247134 | 1.444710  | 4.097968  |
| 62 | 1 | 0 | -0.097385 | 2.521513  | 4.109335  |
| 63 | 6 | 0 | 0.871460  | 0.609997  | 4.225012  |
| 64 | 6 | 0 | 2.221136  | 1.177957  | 4.408880  |
| 65 | 1 | 0 | 3.049355  | 0.451906  | 4.407775  |
| 66 | 6 | 0 | 3.775258  | 2.867838  | 4.795186  |
| 67 | 1 | 0 | 4.490375  | 2.026387  | 4.754578  |
| 68 | 6 | 0 | 4.151838  | 3.844193  | 3.669740  |
| 69 | 1 | 0 | 3.408301  | 4.661589  | 3.679862  |
| 70 | 6 | 0 | 5.549993  | 4.424147  | 3.907105  |

|     |   |   |           |           |           |
|-----|---|---|-----------|-----------|-----------|
| 71  | 1 | 0 | 5.785454  | 5.123753  | 3.097770  |
| 72  | 1 | 0 | 6.276771  | 3.604076  | 3.841330  |
| 73  | 6 | 0 | 5.649128  | 5.107475  | 5.271415  |
| 74  | 1 | 0 | 6.661974  | 5.495133  | 5.423289  |
| 75  | 1 | 0 | 4.970818  | 5.971224  | 5.297014  |
| 76  | 6 | 0 | 5.270750  | 4.138246  | 6.392897  |
| 77  | 1 | 0 | 5.309314  | 4.640797  | 7.365092  |
| 78  | 1 | 0 | 6.005254  | 3.322075  | 6.427418  |
| 79  | 6 | 0 | 3.875874  | 3.556672  | 6.160051  |
| 80  | 1 | 0 | 3.122595  | 4.354295  | 6.197646  |
| 81  | 1 | 0 | 3.614319  | 2.834846  | 6.941377  |
| 82  | 6 | 0 | 3.328438  | 3.520816  | 1.516130  |
| 83  | 1 | 0 | 2.648062  | 4.372040  | 1.676087  |
| 84  | 6 | 0 | 3.259841  | 2.887509  | 0.184881  |
| 85  | 6 | 0 | 3.995431  | 1.728360  | -0.096961 |
| 86  | 1 | 0 | 4.597090  | 1.288049  | 0.694369  |
| 87  | 6 | 0 | 3.969339  | 1.169855  | -1.369254 |
| 88  | 6 | 0 | 3.194509  | 1.769083  | -2.371615 |
| 89  | 1 | 0 | 3.193454  | 1.325430  | -3.364215 |
| 90  | 6 | 0 | 2.461539  | 2.918674  | -2.102228 |
| 91  | 6 | 0 | 2.494556  | 3.474103  | -0.815908 |
| 92  | 1 | 0 | 1.923722  | 4.379465  | -0.624727 |
| 93  | 6 | 0 | 1.699175  | 3.567945  | -3.186318 |
| 94  | 1 | 0 | 1.654527  | 3.014007  | -4.137252 |
| 95  | 6 | 0 | 0.461033  | 5.269625  | -4.182174 |
| 96  | 1 | 0 | 0.494358  | 4.591825  | -5.054278 |
| 97  | 6 | 0 | -1.017218 | 5.468206  | -3.812064 |
| 98  | 1 | 0 | -1.048540 | 6.107303  | -2.911141 |
| 99  | 6 | 0 | -1.768818 | 6.160057  | -4.953953 |
| 100 | 1 | 0 | -2.814083 | 6.298894  | -4.657203 |
| 101 | 1 | 0 | -1.770144 | 5.486589  | -5.820835 |
| 102 | 6 | 0 | -1.120151 | 7.494221  | -5.324566 |
| 103 | 1 | 0 | -1.192241 | 8.184087  | -4.472678 |
| 104 | 1 | 0 | -1.664189 | 7.957332  | -6.154478 |
| 105 | 6 | 0 | 0.352594  | 7.299103  | -5.689641 |
| 106 | 1 | 0 | 0.420769  | 6.685324  | -6.598183 |
| 107 | 1 | 0 | 0.822378  | 8.260908  | -5.920816 |
| 108 | 6 | 0 | 1.106770  | 6.608769  | -4.552642 |
| 109 | 1 | 0 | 1.109921  | 7.246471  | -3.659122 |
| 110 | 1 | 0 | 2.153896  | 6.434437  | -4.822919 |
| 111 | 6 | 0 | -2.088043 | 3.949336  | -2.409684 |
| 112 | 1 | 0 | -2.053511 | 4.704199  | -1.608370 |
| 113 | 7 | 0 | 0.167800  | -3.585744 | 4.452389  |
| 114 | 7 | 0 | 0.291914  | -5.291369 | 2.152363  |
| 115 | 7 | 0 | 3.973986  | -3.153624 | -2.641191 |
| 116 | 7 | 0 | 4.944326  | -0.463827 | -2.838927 |
| 117 | 6 | 0 | 0.701046  | -0.769258 | 4.226315  |
| 118 | 1 | 0 | 1.551953  | -1.437369 | 4.334300  |
| 119 | 6 | 0 | -0.579572 | -1.326586 | 4.109576  |
| 120 | 6 | 0 | -0.776246 | -2.787977 | 4.169695  |
| 121 | 1 | 0 | -1.801963 | -3.140348 | 3.977663  |
| 122 | 6 | 0 | -0.140934 | -4.999714 | 4.522861  |
| 123 | 1 | 0 | -1.204592 | -5.194059 | 4.294940  |
| 124 | 6 | 0 | 0.696610  | -5.741083 | 3.469002  |
| 125 | 1 | 0 | 1.758290  | -5.508169 | 3.668177  |
| 126 | 6 | 0 | 0.478034  | -7.253789 | 3.575942  |
| 127 | 1 | 0 | 1.095468  | -7.755133 | 2.822718  |
| 128 | 1 | 0 | -0.568802 | -7.467366 | 3.323812  |
| 129 | 6 | 0 | 0.797108  | -7.768255 | 4.980089  |



|     |   |   |           |           |           |
|-----|---|---|-----------|-----------|-----------|
| 130 | 1 | 0 | 0.614083  | -8.846570 | 5.034339  |
| 131 | 1 | 0 | 1.864464  | -7.615854 | 5.190681  |
| 132 | 6 | 0 | -0.032837 | -7.028657 | 6.031037  |
| 133 | 1 | 0 | 0.223534  | -7.375476 | 7.037616  |
| 134 | 1 | 0 | -1.096276 | -7.257201 | 5.877136  |
| 135 | 6 | 0 | 0.182108  | -5.518264 | 5.927926  |
| 136 | 1 | 0 | 1.227104  | -5.268824 | 6.153349  |
| 137 | 1 | 0 | -0.437133 | -4.981471 | 6.654772  |
| 138 | 6 | 0 | 1.165742  | -4.730376 | 1.424850  |
| 139 | 1 | 0 | 2.201659  | -4.578706 | 1.766877  |
| 140 | 6 | 0 | 0.869771  | -4.269158 | 0.054576  |
| 141 | 6 | 0 | -0.437719 | -4.306851 | -0.448618 |
| 142 | 1 | 0 | -1.235921 | -4.657070 | 0.201246  |
| 143 | 6 | 0 | -0.699345 | -3.923751 | -1.758635 |
| 144 | 6 | 0 | 0.353617  | -3.490057 | -2.575577 |
| 145 | 1 | 0 | 0.133327  | -3.204032 | -3.601122 |
| 146 | 6 | 0 | 1.653649  | -3.449122 | -2.086052 |
| 147 | 6 | 0 | 1.907001  | -3.837582 | -0.763507 |
| 148 | 1 | 0 | 2.931187  | -3.809664 | -0.399684 |
| 149 | 6 | 0 | 2.756858  | -3.046571 | -2.979867 |
| 150 | 1 | 0 | 2.456358  | -2.670151 | -3.970390 |
| 151 | 6 | 0 | 4.981010  | -2.765748 | -3.608167 |
| 152 | 1 | 0 | 4.523476  | -2.400414 | -4.545331 |
| 153 | 6 | 0 | 5.809466  | -1.611653 | -3.022147 |
| 154 | 1 | 0 | 6.228017  | -1.961156 | -2.061031 |
| 155 | 6 | 0 | 6.953478  | -1.236283 | -3.969692 |
| 156 | 1 | 0 | 7.532267  | -0.421631 | -3.521073 |
| 157 | 1 | 0 | 6.515740  | -0.843661 | -4.896669 |
| 158 | 6 | 0 | 7.844726  | -2.440208 | -4.276822 |
| 159 | 1 | 0 | 8.334531  | -2.776714 | -3.352878 |
| 160 | 1 | 0 | 8.641048  | -2.149363 | -4.969994 |
| 161 | 6 | 0 | 7.021180  | -3.591572 | -4.856827 |
| 162 | 1 | 0 | 6.607886  | -3.286121 | -5.827760 |
| 163 | 1 | 0 | 7.656796  | -4.463651 | -5.043036 |
| 164 | 6 | 0 | 5.877887  | -3.969626 | -3.914441 |
| 165 | 1 | 0 | 6.279570  | -4.347822 | -2.965406 |
| 166 | 1 | 0 | 5.263395  | -4.769691 | -4.341301 |
| 167 | 6 | 0 | 4.797082  | -0.016419 | -1.661770 |
| 168 | 1 | 0 | 5.299400  | -0.474190 | -0.795029 |
| 169 | 6 | 0 | -0.482663 | 3.082112  | 1.001592  |
| 170 | 6 | 0 | 2.726069  | -1.188232 | 1.389123  |
| 171 | 6 | 0 | -2.567591 | -1.846344 | 0.869573  |
| 172 | 1 | 0 | 0.418671  | 2.676638  | 1.469771  |
| 173 | 1 | 0 | 2.564096  | -0.155868 | 1.711702  |
| 174 | 1 | 0 | -1.654613 | -2.243388 | 1.322242  |
| 175 | 1 | 0 | -2.717704 | -0.817915 | 1.210006  |
| 176 | 1 | 0 | -2.458435 | -1.850592 | -0.218581 |
| 177 | 1 | 0 | -0.361873 | 3.060481  | -0.085129 |
| 178 | 1 | 0 | -1.339699 | 2.461869  | 1.278701  |
| 179 | 1 | 0 | 1.864750  | -1.794351 | 1.683681  |
| 180 | 1 | 0 | 2.824238  | -1.211515 | 0.300161  |
| 181 | 6 | 0 | 0.326724  | -0.046767 | -3.265695 |
| 182 | 1 | 0 | 1.235079  | -0.433450 | -2.795178 |
| 183 | 1 | 0 | -0.522260 | -0.669435 | -2.969919 |
| 184 | 1 | 0 | 0.155141  | 0.977812  | -2.923918 |
| 185 | 1 | 0 | -3.423627 | -2.461938 | 1.159220  |
| 186 | 1 | 0 | -0.644653 | 4.110274  | 1.336702  |
| 187 | 1 | 0 | 3.634182  | -1.583759 | 1.852298  |
| 188 | 1 | 0 | 0.436882  | -0.061671 | -4.353484 |

|     |   |   |           |           |           |
|-----|---|---|-----------|-----------|-----------|
| 189 | 6 | 0 | 0.001878  | -0.002687 | -0.001197 |
| 190 | 1 | 0 | -0.107284 | 0.013973  | 1.088220  |
| 191 | 1 | 0 | -0.907125 | 0.394329  | -0.465114 |
| 192 | 1 | 0 | 0.859059  | 0.613763  | -0.291593 |
| 193 | 1 | 0 | 0.162803  | -1.032738 | -0.336198 |

6CH4@CC3 T cc3-roo

Standard orientation:

| Center Number | Atomic Number | Atomic Type | Coordinates (Angstroms) |           |           |
|---------------|---------------|-------------|-------------------------|-----------|-----------|
|               |               |             | X                       | Y         | Z         |
| 1             | 7             | 0           | -5.595894               | -1.156393 | 0.938899  |
| 2             | 7             | 0           | -5.595894               | 1.156393  | -0.938899 |
| 3             | 7             | 0           | -1.156393               | 0.938899  | -5.595894 |
| 4             | 7             | 0           | 1.156393                | -0.938899 | -5.595894 |
| 5             | 6             | 0           | -3.476171               | -3.014231 | 1.587480  |
| 6             | 1             | 0           | -4.093046               | -3.234810 | 0.719497  |
| 7             | 6             | 0           | -3.800510               | -1.896956 | 2.372367  |
| 8             | 6             | 0           | -4.933541               | -1.017279 | 2.012120  |
| 9             | 1             | 0           | -5.155520               | -0.213183 | 2.731916  |
| 10            | 6             | 0           | -6.724589               | -0.265924 | 0.721291  |
| 11            | 1             | 0           | -6.684969               | 0.605923  | 1.398563  |
| 12            | 6             | 0           | -6.724589               | 0.265924  | -0.721291 |
| 13            | 1             | 0           | -6.684969               | -0.605923 | -1.398563 |
| 14            | 6             | 0           | -8.006491               | 1.065158  | -1.001887 |
| 15            | 1             | 0           | -7.980719               | 1.406042  | -2.042826 |
| 16            | 1             | 0           | -7.991263               | 1.965210  | -0.373044 |
| 17            | 6             | 0           | -9.269321               | 0.252753  | -0.721037 |
| 18            | 1             | 0           | -10.157462              | 0.862509  | -0.917969 |
| 19            | 1             | 0           | -9.312954               | -0.605531 | -1.405251 |
| 20            | 6             | 0           | -9.269321               | -0.252753 | 0.721037  |
| 21            | 1             | 0           | -10.157462              | -0.862509 | 0.917969  |
| 22            | 1             | 0           | -9.312954               | 0.605531  | 1.405251  |
| 23            | 6             | 0           | -8.006491               | -1.065158 | 1.001887  |
| 24            | 1             | 0           | -7.991263               | -1.965210 | 0.373044  |
| 25            | 1             | 0           | -7.980719               | -1.406042 | 2.042826  |
| 26            | 6             | 0           | -4.933541               | 1.017279  | -2.012120 |
| 27            | 1             | 0           | -5.155520               | 0.213183  | -2.731916 |
| 28            | 6             | 0           | -3.800510               | 1.896956  | -2.372367 |
| 29            | 6             | 0           | -3.476171               | 3.014231  | -1.587480 |
| 30            | 1             | 0           | -4.093046               | 3.234810  | -0.719497 |
| 31            | 6             | 0           | -2.372367               | 3.800510  | -1.896956 |
| 32            | 6             | 0           | -1.587480               | 3.476171  | -3.014231 |
| 33            | 1             | 0           | -0.719497               | 4.093046  | -3.234810 |
| 34            | 6             | 0           | -1.896956               | 2.372367  | -3.800510 |
| 35            | 6             | 0           | -3.014231               | 1.587480  | -3.476171 |
| 36            | 1             | 0           | -3.234810               | 0.719497  | -4.093046 |
| 37            | 6             | 0           | -1.017279               | 2.012120  | -4.933541 |
| 38            | 1             | 0           | -0.213183               | 2.731916  | -5.155520 |
| 39            | 6             | 0           | -0.265924               | 0.721291  | -6.724589 |
| 40            | 1             | 0           | 0.605923                | 1.398563  | -6.684969 |
| 41            | 6             | 0           | 0.265924                | -0.721291 | -6.724589 |
| 42            | 1             | 0           | -0.605923               | -1.398563 | -6.684969 |
| 43            | 6             | 0           | 1.065158                | -1.001887 | -8.006491 |
| 44            | 1             | 0           | 1.406042                | -2.042826 | -7.980719 |
| 45            | 1             | 0           | 1.965210                | -0.373044 | -7.991263 |
| 46            | 6             | 0           | 0.252753                | -0.721037 | -9.269321 |

|     |   |   |           |           |            |
|-----|---|---|-----------|-----------|------------|
| 47  | 1 | 0 | -0.605531 | -1.405251 | -9.312954  |
| 48  | 1 | 0 | 0.862509  | -0.917969 | -10.157462 |
| 49  | 6 | 0 | -0.252753 | 0.721037  | -9.269321  |
| 50  | 1 | 0 | 0.605531  | 1.405251  | -9.312954  |
| 51  | 1 | 0 | -0.862509 | 0.917969  | -10.157462 |
| 52  | 6 | 0 | -1.065158 | 1.001887  | -8.006491  |
| 53  | 1 | 0 | -1.965210 | 0.373044  | -7.991263  |
| 54  | 1 | 0 | -1.406042 | 2.042826  | -7.980719  |
| 55  | 6 | 0 | 1.017279  | -2.012120 | -4.933541  |
| 56  | 1 | 0 | 0.213183  | -2.731916 | -5.155520  |
| 57  | 7 | 0 | -1.156393 | -0.938899 | 5.595894   |
| 58  | 7 | 0 | 1.156393  | 0.938899  | 5.595894   |
| 59  | 7 | 0 | 0.938899  | 5.595894  | 1.156393   |
| 60  | 7 | 0 | -0.938899 | 5.595894  | -1.156393  |
| 61  | 6 | 0 | -3.014231 | -1.587480 | 3.476171   |
| 62  | 1 | 0 | -3.234810 | -0.719497 | 4.093046   |
| 63  | 6 | 0 | -1.896956 | -2.372367 | 3.800510   |
| 64  | 6 | 0 | -1.017279 | -2.012120 | 4.933541   |
| 65  | 1 | 0 | -0.213183 | -2.731916 | 5.155520   |
| 66  | 6 | 0 | -0.265924 | -0.721291 | 6.724589   |
| 67  | 1 | 0 | 0.605923  | -1.398563 | 6.684969   |
| 68  | 6 | 0 | 0.265924  | 0.721291  | 6.724589   |
| 69  | 1 | 0 | -0.605923 | 1.398563  | 6.684969   |
| 70  | 6 | 0 | 1.065158  | 1.001887  | 8.006491   |
| 71  | 1 | 0 | 1.406042  | 2.042826  | 7.980719   |
| 72  | 1 | 0 | 1.965210  | 0.373044  | 7.991263   |
| 73  | 6 | 0 | 0.252753  | 0.721037  | 9.269321   |
| 74  | 1 | 0 | 0.862509  | 0.917969  | 10.157462  |
| 75  | 1 | 0 | -0.605531 | 1.405251  | 9.312954   |
| 76  | 6 | 0 | -0.252753 | -0.721037 | 9.269321   |
| 77  | 1 | 0 | -0.862509 | -0.917969 | 10.157462  |
| 78  | 1 | 0 | 0.605531  | -1.405251 | 9.312954   |
| 79  | 6 | 0 | -1.065158 | -1.001887 | 8.006491   |
| 80  | 1 | 0 | -1.965210 | -0.373044 | 7.991263   |
| 81  | 1 | 0 | -1.406042 | -2.042826 | 7.980719   |
| 82  | 6 | 0 | 1.017279  | 2.012120  | 4.933541   |
| 83  | 1 | 0 | 0.213183  | 2.731916  | 5.155520   |
| 84  | 6 | 0 | 1.896956  | 2.372367  | 3.800510   |
| 85  | 6 | 0 | 3.014231  | 1.587480  | 3.476171   |
| 86  | 1 | 0 | 3.234810  | 0.719497  | 4.093046   |
| 87  | 6 | 0 | 3.800510  | 1.896956  | 2.372367   |
| 88  | 6 | 0 | 3.476171  | 3.014231  | 1.587480   |
| 89  | 1 | 0 | 4.093046  | 3.234810  | 0.719497   |
| 90  | 6 | 0 | 2.372367  | 3.800510  | 1.896956   |
| 91  | 6 | 0 | 1.587480  | 3.476171  | 3.014231   |
| 92  | 1 | 0 | 0.719497  | 4.093046  | 3.234810   |
| 93  | 6 | 0 | 2.012120  | 4.933541  | 1.017279   |
| 94  | 1 | 0 | 2.731916  | 5.155520  | 0.213183   |
| 95  | 6 | 0 | 0.721291  | 6.724589  | 0.265924   |
| 96  | 1 | 0 | 1.398563  | 6.684969  | -0.605923  |
| 97  | 6 | 0 | -0.721291 | 6.724589  | -0.265924  |
| 98  | 1 | 0 | -1.398563 | 6.684969  | 0.605923   |
| 99  | 6 | 0 | -1.001887 | 8.006491  | -1.065158  |
| 100 | 1 | 0 | -2.042826 | 7.980719  | -1.406042  |
| 101 | 1 | 0 | -0.373044 | 7.991263  | -1.965210  |
| 102 | 6 | 0 | -0.721037 | 9.269321  | -0.252753  |
| 103 | 1 | 0 | -1.405251 | 9.312954  | 0.605531   |
| 104 | 1 | 0 | -0.917969 | 10.157462 | -0.862509  |
| 105 | 6 | 0 | 0.721037  | 9.269321  | 0.252753   |

|     |   |   |           |            |           |
|-----|---|---|-----------|------------|-----------|
| 106 | 1 | 0 | 1.405251  | 9.312954   | -0.605531 |
| 107 | 1 | 0 | 0.917969  | 10.157462  | 0.862509  |
| 108 | 6 | 0 | 1.001887  | 8.006491   | 1.065158  |
| 109 | 1 | 0 | 0.373044  | 7.991263   | 1.965210  |
| 110 | 1 | 0 | 2.042826  | 7.980719   | 1.406042  |
| 111 | 6 | 0 | -2.012120 | 4.933541   | -1.017279 |
| 112 | 1 | 0 | -2.731916 | 5.155520   | -0.213183 |
| 113 | 7 | 0 | -0.938899 | -5.595894  | 1.156393  |
| 114 | 7 | 0 | 0.938899  | -5.595894  | -1.156393 |
| 115 | 7 | 0 | 5.595894  | -1.156393  | -0.938899 |
| 116 | 7 | 0 | 5.595894  | 1.156393   | 0.938899  |
| 117 | 6 | 0 | -1.587480 | -3.476171  | 3.014231  |
| 118 | 1 | 0 | -0.719497 | -4.093046  | 3.234810  |
| 119 | 6 | 0 | -2.372367 | -3.800510  | 1.896956  |
| 120 | 6 | 0 | -2.012120 | -4.933541  | 1.017279  |
| 121 | 1 | 0 | -2.731916 | -5.155520  | 0.213183  |
| 122 | 6 | 0 | -0.721291 | -6.724589  | 0.265924  |
| 123 | 1 | 0 | -1.398563 | -6.684969  | -0.605923 |
| 124 | 6 | 0 | 0.721291  | -6.724589  | -0.265924 |
| 125 | 1 | 0 | 1.398563  | -6.684969  | 0.605923  |
| 126 | 6 | 0 | 1.001887  | -8.006491  | -1.065158 |
| 127 | 1 | 0 | 2.042826  | -7.980719  | -1.406042 |
| 128 | 1 | 0 | 0.373044  | -7.991263  | -1.965210 |
| 129 | 6 | 0 | 0.721037  | -9.269321  | -0.252753 |
| 130 | 1 | 0 | 0.917969  | -10.157462 | -0.862509 |
| 131 | 1 | 0 | 1.405251  | -9.312954  | 0.605531  |
| 132 | 6 | 0 | -0.721037 | -9.269321  | 0.252753  |
| 133 | 1 | 0 | -0.917969 | -10.157462 | 0.862509  |
| 134 | 1 | 0 | -1.405251 | -9.312954  | -0.605531 |
| 135 | 6 | 0 | -1.001887 | -8.006491  | 1.065158  |
| 136 | 1 | 0 | -0.373044 | -7.991263  | 1.965210  |
| 137 | 1 | 0 | -2.042826 | -7.980719  | 1.406042  |
| 138 | 6 | 0 | 2.012120  | -4.933541  | -1.017279 |
| 139 | 1 | 0 | 2.731916  | -5.155520  | -0.213183 |
| 140 | 6 | 0 | 2.372367  | -3.800510  | -1.896956 |
| 141 | 6 | 0 | 1.587480  | -3.476171  | -3.014231 |
| 142 | 1 | 0 | 0.719497  | -4.093046  | -3.234810 |
| 143 | 6 | 0 | 1.896956  | -2.372367  | -3.800510 |
| 144 | 6 | 0 | 3.014231  | -1.587480  | -3.476171 |
| 145 | 1 | 0 | 3.234810  | -0.719497  | -4.093046 |
| 146 | 6 | 0 | 3.800510  | -1.896956  | -2.372367 |
| 147 | 6 | 0 | 3.476171  | -3.014231  | -1.587480 |
| 148 | 1 | 0 | 4.093046  | -3.234810  | -0.719497 |
| 149 | 6 | 0 | 4.933541  | -1.017279  | -2.012120 |
| 150 | 1 | 0 | 5.155520  | -0.213183  | -2.731916 |
| 151 | 6 | 0 | 6.724589  | -0.265924  | -0.721291 |
| 152 | 1 | 0 | 6.684969  | 0.605923   | -1.398563 |
| 153 | 6 | 0 | 6.724589  | 0.265924   | 0.721291  |
| 154 | 1 | 0 | 6.684969  | -0.605923  | 1.398563  |
| 155 | 6 | 0 | 8.006491  | 1.065158   | 1.001887  |
| 156 | 1 | 0 | 7.980719  | 1.406042   | 2.042826  |
| 157 | 1 | 0 | 7.991263  | 1.965210   | 0.373044  |
| 158 | 6 | 0 | 9.269321  | 0.252753   | 0.721037  |
| 159 | 1 | 0 | 9.312954  | -0.605531  | 1.405251  |
| 160 | 1 | 0 | 10.157462 | 0.862509   | 0.917969  |
| 161 | 6 | 0 | 9.269321  | -0.252753  | -0.721037 |
| 162 | 1 | 0 | 9.312954  | 0.605531   | -1.405251 |
| 163 | 1 | 0 | 10.157462 | -0.862509  | -0.917969 |
| 164 | 6 | 0 | 8.006491  | -1.065158  | -1.001887 |

|     |   |   |           |           |           |
|-----|---|---|-----------|-----------|-----------|
| 165 | 1 | 0 | 7.991263  | -1.965210 | -0.373044 |
| 166 | 1 | 0 | 7.980719  | -1.406042 | -2.042826 |
| 167 | 6 | 0 | 4.933541  | 1.017279  | 2.012120  |
| 168 | 1 | 0 | 5.155520  | 0.213183  | 2.731916  |
| 169 | 6 | 0 | 0.000000  | 0.000000  | -2.606135 |
| 170 | 6 | 0 | 0.000000  | 2.606135  | -0.000000 |
| 171 | 6 | 0 | 0.000000  | 0.000000  | 2.606135  |
| 172 | 6 | 0 | -0.000000 | -2.606135 | 0.000000  |
| 173 | 6 | 0 | 2.606135  | -0.000000 | 0.000000  |
| 174 | 6 | 0 | -2.606135 | 0.000000  | -0.000000 |
| 175 | 1 | 0 | 0.849331  | -0.254288 | 3.244409  |
| 176 | 1 | 0 | -0.849331 | 0.254288  | 3.244409  |
| 177 | 1 | 0 | 0.251981  | 0.855462  | 1.978362  |
| 178 | 1 | 0 | -0.849331 | -0.254288 | -3.244409 |
| 179 | 1 | 0 | 0.849331  | 0.254288  | -3.244409 |
| 180 | 1 | 0 | -0.251981 | 0.855462  | -1.978362 |
| 181 | 1 | 0 | 0.855462  | -1.978362 | -0.251981 |
| 182 | 1 | 0 | -0.254288 | -3.244409 | -0.849331 |
| 183 | 1 | 0 | 0.254288  | -3.244409 | 0.849331  |
| 184 | 1 | 0 | 3.244409  | -0.849331 | 0.254288  |
| 185 | 1 | 0 | 1.978362  | -0.251981 | -0.855462 |
| 186 | 1 | 0 | 3.244409  | 0.849331  | -0.254288 |
| 187 | 1 | 0 | -0.254288 | 3.244409  | 0.849331  |
| 188 | 1 | 0 | 0.254288  | 3.244409  | -0.849331 |
| 189 | 1 | 0 | -0.855462 | 1.978362  | -0.251981 |
| 190 | 1 | 0 | -3.244409 | 0.849331  | 0.254288  |
| 191 | 1 | 0 | -3.244409 | -0.849331 | -0.254288 |
| 192 | 1 | 0 | -1.978362 | 0.251981  | -0.855462 |
| 193 | 1 | 0 | 0.855462  | 1.978362  | 0.251981  |
| 194 | 1 | 0 | 1.978362  | 0.251981  | 0.855462  |
| 195 | 1 | 0 | 0.251981  | -0.855462 | -1.978362 |
| 196 | 1 | 0 | -0.855462 | -1.978362 | 0.251981  |
| 197 | 1 | 0 | -0.251981 | -0.855462 | 1.978362  |
| 198 | 1 | 0 | -1.978362 | -0.251981 | 0.855462  |

6CH4@CC3 C1 cc3-rooxx

Standard orientation:

| Center<br>Number | Atomic<br>Number | Atomic<br>Type | Coordinates (Angstroms) |           |           |
|------------------|------------------|----------------|-------------------------|-----------|-----------|
|                  |                  |                | X                       | Y         | Z         |
| 1                | 7                | 0              | -3.437564               | -1.244179 | 4.491002  |
| 2                | 7                | 0              | -3.813018               | 1.674383  | 4.024716  |
| 3                | 7                | 0              | -4.109483               | 3.469217  | -2.151626 |
| 4                | 7                | 0              | -3.312308               | 1.719462  | -4.427261 |
| 5                | 6                | 0              | -2.330651               | -3.272300 | 2.749239  |
| 6                | 1                | 0              | -3.388518               | -3.042046 | 2.646900  |
| 7                | 6                | 0              | -1.602035               | -2.633980 | 3.764657  |
| 8                | 6                | 0              | -2.245040               | -1.644685 | 4.656512  |
| 9                | 1                | 0              | -1.610158               | -1.258692 | 5.470071  |
| 10               | 6                | 0              | -3.978279               | -0.311957 | 5.467240  |
| 11               | 1                | 0              | -3.176041               | 0.143284  | 6.075114  |
| 12               | 6                | 0              | -4.734372               | 0.828626  | 4.766498  |
| 13               | 1                | 0              | -5.485469               | 0.370420  | 4.098489  |
| 14               | 6                | 0              | -5.449844               | 1.715111  | 5.797466  |
| 15               | 1                | 0              | -5.995084               | 2.499149  | 5.260392  |
| 16               | 1                | 0              | -4.684736               | 2.218983  | 6.402869  |
| 17               | 6                | 0              | -6.386886               | 0.914391  | 6.699843  |

|    |   |   |           |           |           |
|----|---|---|-----------|-----------|-----------|
| 18 | 1 | 0 | -6.862873 | 1.579383  | 7.428267  |
| 19 | 1 | 0 | -7.191691 | 0.474980  | 6.094955  |
| 20 | 6 | 0 | -5.621534 | -0.203058 | 7.407265  |
| 21 | 1 | 0 | -6.295697 | -0.800082 | 8.030521  |
| 22 | 1 | 0 | -4.873705 | 0.239697  | 8.079131  |
| 23 | 6 | 0 | -4.922963 | -1.100388 | 6.387342  |
| 24 | 1 | 0 | -5.668088 | -1.605420 | 5.758438  |
| 25 | 1 | 0 | -4.344477 | -1.886405 | 6.885318  |
| 26 | 6 | 0 | -4.148437 | 2.024307  | 2.852127  |
| 27 | 1 | 0 | -5.071897 | 1.655583  | 2.377570  |
| 28 | 6 | 0 | -3.323606 | 2.926535  | 2.019532  |
| 29 | 6 | 0 | -2.173370 | 3.539428  | 2.539825  |
| 30 | 1 | 0 | -1.913668 | 3.356473  | 3.579848  |
| 31 | 6 | 0 | -1.369224 | 4.336295  | 1.733032  |
| 32 | 6 | 0 | -1.724545 | 4.536458  | 0.390236  |
| 33 | 1 | 0 | -1.077732 | 5.151277  | -0.231219 |
| 34 | 6 | 0 | -2.861113 | 3.935464  | -0.138539 |
| 35 | 6 | 0 | -3.663555 | 3.133560  | 0.687561  |
| 36 | 1 | 0 | -4.541564 | 2.659397  | 0.255312  |
| 37 | 6 | 0 | -3.178105 | 4.107626  | -1.572930 |
| 38 | 1 | 0 | -2.534928 | 4.817473  | -2.117336 |
| 39 | 6 | 0 | -4.362120 | 3.765739  | -3.552588 |
| 40 | 1 | 0 | -3.517337 | 4.314795  | -4.005598 |
| 41 | 6 | 0 | -4.556560 | 2.468432  | -4.354339 |
| 42 | 1 | 0 | -5.349094 | 1.882916  | -3.854944 |
| 43 | 6 | 0 | -4.992825 | 2.783605  | -5.793429 |
| 44 | 1 | 0 | -5.143944 | 1.837079  | -6.324186 |
| 45 | 1 | 0 | -4.163697 | 3.299632  | -6.295477 |
| 46 | 6 | 0 | -6.251917 | 3.647185  | -5.841640 |
| 47 | 1 | 0 | -7.093493 | 3.093240  | -5.403944 |
| 48 | 1 | 0 | -6.518501 | 3.861535  | -6.882009 |
| 49 | 6 | 0 | -6.041134 | 4.942907  | -5.059604 |
| 50 | 1 | 0 | -5.257945 | 5.537629  | -5.549097 |
| 51 | 1 | 0 | -6.952103 | 5.550771  | -5.064117 |
| 52 | 6 | 0 | -5.625582 | 4.637245  | -3.621753 |
| 53 | 1 | 0 | -6.434195 | 4.106847  | -3.101549 |
| 54 | 1 | 0 | -5.440466 | 5.559980  | -3.060736 |
| 55 | 6 | 0 | -3.365946 | 0.467497  | -4.228228 |
| 56 | 1 | 0 | -4.304413 | -0.036282 | -3.946389 |
| 57 | 7 | 0 | 2.608823  | -3.379959 | 3.912072  |
| 58 | 7 | 0 | 4.812471  | -1.808297 | 2.666886  |
| 59 | 7 | 0 | 3.475135  | 4.382022  | 1.504701  |
| 60 | 7 | 0 | 0.724991  | 5.526385  | 1.570523  |
| 61 | 6 | 0 | -0.244685 | -2.901326 | 3.901337  |
| 62 | 1 | 0 | 0.346385  | -2.409899 | 4.670560  |
| 63 | 6 | 0 | 0.400397  | -3.789558 | 3.027077  |
| 64 | 6 | 0 | 1.856696  | -4.029415 | 3.123127  |
| 65 | 1 | 0 | 2.254404  | -4.801533 | 2.445189  |
| 66 | 6 | 0 | 4.015511  | -3.745462 | 3.957752  |
| 67 | 1 | 0 | 4.299086  | -4.360997 | 3.085382  |
| 68 | 6 | 0 | 4.902307  | -2.489611 | 3.948360  |
| 69 | 1 | 0 | 4.566443  | -1.837491 | 4.774362  |
| 70 | 6 | 0 | 6.374953  | -2.867299 | 4.170410  |
| 71 | 1 | 0 | 6.970131  | -1.947466 | 4.181185  |
| 72 | 1 | 0 | 6.711021  | -3.452126 | 3.303908  |
| 73 | 6 | 0 | 6.580638  | -3.669385 | 5.454081  |
| 74 | 1 | 0 | 7.638162  | -3.931210 | 5.565756  |
| 75 | 1 | 0 | 6.311771  | -3.049995 | 6.320541  |
| 76 | 6 | 0 | 5.710767  | -4.925623 | 5.444148  |

|     |   |   |           |           |           |
|-----|---|---|-----------|-----------|-----------|
| 77  | 1 | 0 | 5.830512  | -5.487235 | 6.376689  |
| 78  | 1 | 0 | 6.037959  | -5.585875 | 4.629471  |
| 79  | 6 | 0 | 4.242195  | -4.556570 | 5.242815  |
| 80  | 1 | 0 | 3.885531  | -3.957484 | 6.091154  |
| 81  | 1 | 0 | 3.613039  | -5.452633 | 5.201765  |
| 82  | 6 | 0 | 4.686629  | -0.545782 | 2.678419  |
| 83  | 1 | 0 | 4.583645  | 0.019272  | 3.618656  |
| 84  | 6 | 0 | 4.640652  | 0.265130  | 1.442337  |
| 85  | 6 | 0 | 4.855176  | -0.321023 | 0.185431  |
| 86  | 1 | 0 | 5.081416  | -1.383750 | 0.140685  |
| 87  | 6 | 0 | 4.749029  | 0.435520  | -0.976005 |
| 88  | 6 | 0 | 4.437846  | 1.800732  | -0.882389 |
| 89  | 1 | 0 | 4.344913  | 2.375578  | -1.800804 |
| 90  | 6 | 0 | 4.222733  | 2.394556  | 0.356031  |
| 91  | 6 | 0 | 4.332949  | 1.618590  | 1.520140  |
| 92  | 1 | 0 | 4.148153  | 2.094767  | 2.480180  |
| 93  | 6 | 0 | 3.831086  | 3.819157  | 0.424701  |
| 94  | 1 | 0 | 3.848843  | 4.361074  | -0.534440 |
| 95  | 6 | 0 | 3.167388  | 5.802386  | 1.456256  |
| 96  | 1 | 0 | 3.014628  | 6.145037  | 0.417223  |
| 97  | 6 | 0 | 1.879381  | 6.104714  | 2.239404  |
| 98  | 1 | 0 | 2.002563  | 5.692076  | 3.256701  |
| 99  | 6 | 0 | 1.648677  | 7.620752  | 2.334249  |
| 100 | 1 | 0 | 0.738071  | 7.796211  | 2.917740  |
| 101 | 1 | 0 | 1.454504  | 7.999765  | 1.322106  |
| 102 | 6 | 0 | 2.842236  | 8.351737  | 2.946228  |
| 103 | 1 | 0 | 2.982820  | 8.019774  | 3.983880  |
| 104 | 1 | 0 | 2.643732  | 9.428216  | 2.980458  |
| 105 | 6 | 0 | 4.112727  | 8.061390  | 2.148426  |
| 106 | 1 | 0 | 4.005155  | 8.471308  | 1.134977  |
| 107 | 1 | 0 | 4.977163  | 8.557414  | 2.602401  |
| 108 | 6 | 0 | 4.359281  | 6.556099  | 2.066133  |
| 109 | 1 | 0 | 4.541832  | 6.149739  | 3.069794  |
| 110 | 1 | 0 | 5.250646  | 6.335157  | 1.468553  |
| 111 | 6 | 0 | -0.127223 | 4.917816  | 2.286959  |
| 112 | 1 | 0 | 0.022342  | 4.770375  | 3.368549  |
| 113 | 7 | 0 | -1.940623 | -5.455153 | -0.144035 |
| 114 | 7 | 0 | -2.259823 | -4.453741 | -2.931618 |
| 115 | 7 | 0 | 2.569796  | -0.804743 | -5.126659 |
| 116 | 7 | 0 | 4.682349  | 0.375193  | -3.388504 |
| 117 | 6 | 0 | -0.333786 | -4.414869 | 2.025820  |
| 118 | 1 | 0 | 0.143985  | -5.096714 | 1.326255  |
| 119 | 6 | 0 | -1.704601 | -4.154410 | 1.876023  |
| 120 | 6 | 0 | -2.479406 | -4.763664 | 0.773281  |
| 121 | 1 | 0 | -3.562185 | -4.560381 | 0.787705  |
| 122 | 6 | 0 | -2.814289 | -6.049615 | -1.142916 |
| 123 | 1 | 0 | -3.816228 | -5.584604 | -1.127987 |
| 124 | 6 | 0 | -2.233878 | -5.857598 | -2.553553 |
| 125 | 1 | 0 | -1.202305 | -6.252755 | -2.546833 |
| 126 | 6 | 0 | -3.064170 | -6.631901 | -3.588776 |
| 127 | 1 | 0 | -2.607098 | -6.490548 | -4.574452 |
| 128 | 1 | 0 | -4.062458 | -6.176759 | -3.634123 |
| 129 | 6 | 0 | -3.181209 | -8.115797 | -3.245558 |
| 130 | 1 | 0 | -3.792376 | -8.626218 | -3.997440 |
| 131 | 1 | 0 | -2.185483 | -8.578740 | -3.275502 |
| 132 | 6 | 0 | -3.778239 | -8.295881 | -1.850555 |
| 133 | 1 | 0 | -3.834136 | -9.357410 | -1.587092 |
| 134 | 1 | 0 | -4.807021 | -7.910835 | -1.844823 |
| 135 | 6 | 0 | -2.946684 | -7.544294 | -0.812711 |

|     |   |   |           |           |           |
|-----|---|---|-----------|-----------|-----------|
| 136 | 1 | 0 | -1.936785 | -7.972080 | -0.758925 |
| 137 | 1 | 0 | -3.384426 | -7.640230 | 0.187102  |
| 138 | 6 | 0 | -1.224101 | -3.973438 | -3.485238 |
| 139 | 1 | 0 | -0.308554 | -4.570868 | -3.622318 |
| 140 | 6 | 0 | -1.148105 | -2.576393 | -3.964864 |
| 141 | 6 | 0 | -2.274833 | -1.740308 | -3.935735 |
| 142 | 1 | 0 | -3.215384 | -2.149994 | -3.575055 |
| 143 | 6 | 0 | -2.180147 | -0.410590 | -4.329977 |
| 144 | 6 | 0 | -0.946265 | 0.089950  | -4.773143 |
| 145 | 1 | 0 | -0.885574 | 1.135709  | -5.065168 |
| 146 | 6 | 0 | 0.178096  | -0.726884 | -4.807223 |
| 147 | 6 | 0 | 0.067818  | -2.067206 | -4.406230 |
| 148 | 1 | 0 | 0.959502  | -2.689370 | -4.425784 |
| 149 | 6 | 0 | 1.481218  | -0.159022 | -5.215819 |
| 150 | 1 | 0 | 1.449420  | 0.877638  | -5.587662 |
| 151 | 6 | 0 | 3.778895  | -0.160171 | -5.613551 |
| 152 | 1 | 0 | 3.630364  | 0.926826  | -5.742842 |
| 153 | 6 | 0 | 4.935324  | -0.356141 | -4.619612 |
| 154 | 1 | 0 | 5.032661  | -1.440084 | -4.430080 |
| 155 | 6 | 0 | 6.250924  | 0.172892  | -5.211179 |
| 156 | 1 | 0 | 7.052717  | -0.005737 | -4.486147 |
| 157 | 1 | 0 | 6.160962  | 1.261619  | -5.322406 |
| 158 | 6 | 0 | 6.578174  | -0.465168 | -6.559971 |
| 159 | 1 | 0 | 6.739592  | -1.543448 | -6.426023 |
| 160 | 1 | 0 | 7.512173  | -0.049836 | -6.953072 |
| 161 | 6 | 0 | 5.431865  | -0.246571 | -7.546426 |
| 162 | 1 | 0 | 5.327436  | 0.828332  | -7.747329 |
| 163 | 1 | 0 | 5.648050  | -0.730084 | -8.504999 |
| 164 | 6 | 0 | 4.123469  | -0.787645 | -6.973028 |
| 165 | 1 | 0 | 4.193460  | -1.875190 | -6.838357 |
| 166 | 1 | 0 | 3.288409  | -0.607019 | -7.658957 |
| 167 | 6 | 0 | 4.913959  | -0.219433 | -2.291831 |
| 168 | 1 | 0 | 5.234463  | -1.273052 | -2.258612 |
| 169 | 6 | 0 | -1.727754 | 1.208746  | -1.530847 |
| 170 | 6 | 0 | 0.978785  | 2.307017  | 0.715594  |
| 171 | 6 | 0 | 1.727440  | -1.208069 | 1.532443  |
| 172 | 6 | 0 | -0.977175 | -2.307002 | -0.715831 |
| 173 | 6 | 0 | 1.689366  | -0.099332 | -1.981362 |
| 174 | 6 | 0 | -1.688466 | 0.101009  | 1.982263  |
| 175 | 1 | 0 | 2.607526  | -1.757061 | 1.189685  |
| 176 | 1 | 0 | 1.697297  | -1.248668 | 2.623716  |
| 177 | 1 | 0 | 1.790246  | -0.168487 | 1.208590  |
| 178 | 1 | 0 | -2.796578 | 1.313061  | -1.330392 |
| 179 | 1 | 0 | -1.505323 | 1.693340  | -2.484319 |
| 180 | 1 | 0 | -1.153857 | 1.687974  | -0.736805 |
| 181 | 1 | 0 | -0.352164 | -1.668324 | -1.341170 |
| 182 | 1 | 0 | -1.943404 | -2.468074 | -1.199448 |
| 183 | 1 | 0 | -0.490339 | -3.275989 | -0.583541 |
| 184 | 1 | 0 | 1.949096  | -0.993419 | -2.552833 |
| 185 | 1 | 0 | 0.621287  | 0.101487  | -2.073228 |
| 186 | 1 | 0 | 2.254635  | 0.744770  | -2.383126 |
| 187 | 1 | 0 | 1.616816  | 2.490198  | 1.583230  |
| 188 | 1 | 0 | 0.815223  | 3.255873  | 0.199505  |
| 189 | 1 | 0 | 0.024142  | 1.896141  | 1.046352  |
| 190 | 1 | 0 | -1.616181 | 0.759312  | 2.851082  |
| 191 | 1 | 0 | -2.586950 | -0.511711 | 2.085829  |
| 192 | 1 | 0 | -1.757723 | 0.696757  | 1.071318  |
| 193 | 1 | 0 | 1.466993  | 1.604567  | 0.038995  |
| 194 | 1 | 0 | 1.946212  | -0.250966 | -0.932284 |



|     |   |   |           |           |           |
|-----|---|---|-----------|-----------|-----------|
| 195 | 1 | 0 | -1.469305 | 0.150482  | -1.584217 |
| 196 | 1 | 0 | -1.130768 | -1.834350 | 0.255031  |
| 197 | 1 | 0 | 0.828626  | -1.668135 | 1.120113  |
| 198 | 1 | 0 | -0.806819 | -0.539435 | 1.936800  |

SF6@CC3-TS C3 cc3-rsf6ts

Standard orientation:

| Center<br>Number | Atomic<br>Number | Atomic<br>Type | Coordinates (Angstroms) |           |           |
|------------------|------------------|----------------|-------------------------|-----------|-----------|
|                  |                  |                | X                       | Y         | Z         |
| 1                | 7                | 0              | -0.408120               | 4.812450  | 2.460781  |
| 2                | 7                | 0              | 2.359232                | 4.027454  | 2.705556  |
| 3                | 7                | 0              | 5.070293                | 1.765728  | -2.666429 |
| 4                | 7                | 0              | 3.583063                | 0.962021  | -5.003169 |
| 5                | 6                | 0              | -2.126823               | 3.748866  | 0.406580  |
| 6                | 1                | 0              | -1.487188               | 4.588363  | 0.146467  |
| 7                | 6                | 0              | -2.020647               | 3.198867  | 1.692103  |
| 8                | 6                | 0              | -1.079503               | 3.759835  | 2.681973  |
| 9                | 1                | 0              | -1.009866               | 3.214690  | 3.635979  |
| 10               | 6                | 0              | 0.453761                | 5.299005  | 3.520421  |
| 11               | 1                | 0              | 0.449159                | 4.617095  | 4.390436  |
| 12               | 6                | 0              | 1.898100                | 5.369333  | 3.000636  |
| 13               | 1                | 0              | 1.894616                | 6.005337  | 2.096921  |
| 14               | 6                | 0              | 2.820879                | 5.989888  | 4.055845  |
| 15               | 1                | 0              | 3.837698                | 6.037672  | 3.651101  |
| 16               | 1                | 0              | 2.853602                | 5.314758  | 4.920934  |
| 17               | 6                | 0              | 2.334117                | 7.373243  | 4.487356  |
| 18               | 1                | 0              | 3.001500                | 7.783523  | 5.252531  |
| 19               | 1                | 0              | 2.373468                | 8.058619  | 3.629738  |
| 20               | 6                | 0              | 0.897790                | 7.301846  | 5.007802  |
| 21               | 1                | 0              | 0.538600                | 8.298424  | 5.285479  |
| 22               | 1                | 0              | 0.874413                | 6.689653  | 5.919661  |
| 23               | 6                | 0              | -0.028828               | 6.686501  | 3.958478  |
| 24               | 1                | 0              | -0.072820               | 7.329784  | 3.069970  |
| 25               | 1                | 0              | -1.052346               | 6.599946  | 4.339165  |
| 26               | 6                | 0              | 2.745567                | 3.776890  | 1.524333  |
| 27               | 1                | 0              | 2.726799                | 4.539144  | 0.729880  |
| 28               | 6                | 0              | 3.269037                | 2.452714  | 1.134039  |
| 29               | 6                | 0              | 3.263744                | 1.389823  | 2.047595  |
| 30               | 1                | 0              | 2.857587                | 1.566072  | 3.039033  |
| 31               | 6                | 0              | 3.780624                | 0.150498  | 1.692103  |
| 32               | 6                | 0              | 4.310025                | -0.032550 | 0.406580  |
| 33               | 1                | 0              | 4.717233                | -1.006239 | 0.146467  |
| 34               | 6                | 0              | 4.323518                | 1.015463  | -0.505636 |
| 35               | 6                | 0              | 3.795590                | 2.261120  | -0.136744 |
| 36               | 1                | 0              | 3.818558                | 3.069985  | -0.862532 |
| 37               | 6                | 0              | 4.923252                | 0.815788  | -1.839792 |
| 38               | 1                | 0              | 5.253967                | -0.209962 | -2.065878 |
| 39               | 6                | 0              | 5.708897                | 1.467781  | -3.933306 |
| 40               | 1                | 0              | 5.945553                | 0.392148  | -4.024565 |
| 41               | 6                | 0              | 4.745700                | 1.825012  | -5.076229 |
| 42               | 1                | 0              | 4.469217                | 2.888064  | -4.954970 |
| 43               | 6                | 0              | 5.427367                | 1.629083  | -6.435035 |
| 44               | 1                | 0              | 4.722070                | 1.904361  | -7.226726 |
| 45               | 1                | 0              | 5.643771                | 0.559961  | -6.558679 |
| 46               | 6                | 0              | 6.717483                | 2.442751  | -6.540343 |
| 47               | 1                | 0              | 6.478583                | 3.513851  | -6.490248 |

|     |   |   |           |           |           |
|-----|---|---|-----------|-----------|-----------|
| 48  | 1 | 0 | 7.191561  | 2.268687  | -7.512041 |
| 49  | 6 | 0 | 7.676281  | 2.087880  | -5.402559 |
| 50  | 1 | 0 | 7.988150  | 1.039729  | -5.507260 |
| 51  | 1 | 0 | 8.584879  | 2.696427  | -5.460677 |
| 52  | 6 | 0 | 7.001466  | 2.284058  | -4.044743 |
| 53  | 1 | 0 | 6.751678  | 3.342703  | -3.896433 |
| 54  | 1 | 0 | 7.671353  | 1.997913  | -3.226589 |
| 55  | 6 | 0 | 2.446218  | 1.510019  | -4.882249 |
| 56  | 1 | 0 | 2.329970  | 2.603305  | -4.820085 |
| 57  | 7 | 0 | -4.667493 | 0.029428  | 2.705556  |
| 58  | 7 | 0 | -3.963644 | -2.759667 | 2.460781  |
| 59  | 7 | 0 | 2.308261  | -4.056882 | 2.705556  |
| 60  | 7 | 0 | 4.371764  | -2.052783 | 2.460781  |
| 61  | 6 | 0 | -2.835494 | 2.131574  | 2.047595  |
| 62  | 1 | 0 | -2.785052 | 1.691707  | 3.039033  |
| 63  | 6 | 0 | -3.758631 | 1.604712  | 1.134039  |
| 64  | 6 | 0 | -4.643666 | 0.489286  | 1.524333  |
| 65  | 1 | 0 | -5.294414 | 0.091905  | 0.729880  |
| 66  | 6 | 0 | -5.599029 | -1.040864 | 3.000636  |
| 67  | 1 | 0 | -6.148083 | -1.361884 | 2.096921  |
| 68  | 6 | 0 | -4.815953 | -2.256534 | 3.520421  |
| 69  | 1 | 0 | -4.223101 | -1.919564 | 4.390436  |
| 70  | 6 | 0 | -5.776266 | -3.368216 | 3.958478  |
| 71  | 1 | 0 | -5.189548 | -4.211331 | 4.339165  |
| 72  | 1 | 0 | -6.311369 | -3.727956 | 3.069970  |
| 73  | 6 | 0 | -6.772479 | -2.873414 | 5.007802  |
| 74  | 1 | 0 | -7.455947 | -3.682770 | 5.285479  |
| 75  | 1 | 0 | -6.230616 | -2.587562 | 5.919661  |
| 76  | 6 | 0 | -7.552474 | -1.665217 | 4.487356  |
| 77  | 1 | 0 | -8.241479 | -1.292386 | 5.252531  |
| 78  | 1 | 0 | -8.165703 | -1.973826 | 3.629738  |
| 79  | 6 | 0 | -6.597834 | -0.551991 | 4.055845  |
| 80  | 1 | 0 | -6.029516 | -0.186087 | 4.920934  |
| 81  | 1 | 0 | -7.147626 | 0.304708  | 3.651101  |
| 82  | 6 | 0 | -2.716361 | -2.814795 | 2.681973  |
| 83  | 1 | 0 | -2.279070 | -2.481915 | 3.635979  |
| 84  | 6 | 0 | -1.759977 | -3.349365 | 1.692103  |
| 85  | 6 | 0 | -2.183202 | -3.716316 | 0.406580  |
| 86  | 1 | 0 | -3.230045 | -3.582124 | 0.146467  |
| 87  | 6 | 0 | -1.282342 | -4.252008 | -0.505636 |
| 88  | 6 | 0 | 0.060392  | -4.417637 | -0.136744 |
| 89  | 1 | 0 | 0.749406  | -4.841961 | -0.862532 |
| 90  | 6 | 0 | 0.489594  | -4.057426 | 1.134039  |
| 91  | 6 | 0 | -0.428250 | -3.521397 | 2.047595  |
| 92  | 1 | 0 | -0.072535 | -3.257779 | 3.039033  |
| 93  | 6 | 0 | 1.898099  | -4.266176 | 1.524333  |
| 94  | 1 | 0 | 2.567615  | -4.631049 | 0.729880  |
| 95  | 6 | 0 | 3.700929  | -4.328469 | 3.000636  |
| 96  | 1 | 0 | 4.253467  | -4.643454 | 2.096921  |
| 97  | 6 | 0 | 4.362192  | -3.042471 | 3.520421  |
| 98  | 1 | 0 | 3.773942  | -2.697531 | 4.390436  |
| 99  | 6 | 0 | 5.805094  | -3.318285 | 3.958478  |
| 100 | 1 | 0 | 6.241894  | -2.388615 | 4.339165  |
| 101 | 1 | 0 | 6.384189  | -3.601828 | 3.069970  |
| 102 | 6 | 0 | 5.874689  | -4.428432 | 5.007802  |
| 103 | 1 | 0 | 5.356203  | -4.102091 | 5.919661  |
| 104 | 1 | 0 | 6.917346  | -4.615654 | 5.285479  |
| 105 | 6 | 0 | 5.218357  | -5.708026 | 4.487356  |
| 106 | 1 | 0 | 5.792235  | -6.084793 | 3.629738  |

|     |   |   |           |           |           |
|-----|---|---|-----------|-----------|-----------|
| 107 | 1 | 0 | 5.239978  | -6.491137 | 5.252531  |
| 108 | 6 | 0 | 3.776955  | -5.437897 | 4.055845  |
| 109 | 1 | 0 | 3.175914  | -5.128671 | 4.920934  |
| 110 | 1 | 0 | 3.309928  | -6.342380 | 3.651101  |
| 111 | 6 | 0 | 3.795864  | -0.945040 | 2.681973  |
| 112 | 1 | 0 | 3.288936  | -0.732775 | 3.635979  |
| 113 | 7 | 0 | -4.064312 | 3.508139  | -2.666429 |
| 114 | 7 | 0 | -2.624666 | 2.622013  | -5.003169 |
| 115 | 7 | 0 | -0.958397 | -3.584034 | -5.003169 |
| 116 | 7 | 0 | -1.005981 | -5.273867 | -2.666429 |
| 117 | 6 | 0 | -3.855982 | 2.156517  | -0.136744 |
| 118 | 1 | 0 | -4.567964 | 1.771976  | -0.862532 |
| 119 | 6 | 0 | -3.041176 | 3.236545  | -0.505636 |
| 120 | 6 | 0 | -3.168119 | 3.855767  | -1.839792 |
| 121 | 1 | 0 | -2.445151 | 4.655050  | -2.065878 |
| 122 | 6 | 0 | -4.125584 | 4.210159  | -3.933306 |
| 123 | 1 | 0 | -3.312387 | 4.952926  | -4.024565 |
| 124 | 6 | 0 | -3.953357 | 3.197391  | -5.076229 |
| 125 | 1 | 0 | -4.735745 | 2.426423  | -4.954970 |
| 126 | 6 | 0 | -4.124511 | 3.885696  | -6.435035 |
| 127 | 1 | 0 | -4.010260 | 3.137252  | -7.226726 |
| 128 | 1 | 0 | -3.306826 | 4.607669  | -6.558679 |
| 129 | 6 | 0 | -5.474227 | 4.596136  | -6.540343 |
| 130 | 1 | 0 | -5.560521 | 5.093731  | -7.512041 |
| 131 | 1 | 0 | -6.282375 | 3.853693  | -6.490248 |
| 132 | 6 | 0 | -5.646298 | 5.603914  | -5.402559 |
| 133 | 1 | 0 | -6.627614 | 6.086510  | -5.460677 |
| 134 | 1 | 0 | -4.894507 | 6.398076  | -5.507260 |
| 135 | 6 | 0 | -5.478785 | 4.921418  | -4.044743 |
| 136 | 1 | 0 | -6.270705 | 4.175773  | -3.896433 |
| 137 | 1 | 0 | -5.565920 | 5.644630  | -3.226589 |
| 138 | 6 | 0 | -2.530824 | 1.363477  | -4.882249 |
| 139 | 1 | 0 | -3.419513 | 0.716161  | -4.820085 |
| 140 | 6 | 0 | -1.229228 | 0.667909  | -4.842594 |
| 141 | 6 | 0 | -0.028621 | 1.391959  | -4.840618 |
| 142 | 1 | 0 | -0.077715 | 2.477798  | -4.849272 |
| 143 | 6 | 0 | 1.193040  | 0.730588  | -4.842594 |
| 144 | 6 | 0 | 1.219782  | -0.671193 | -4.840618 |
| 145 | 1 | 0 | 2.184693  | -1.171596 | -4.849272 |
| 146 | 6 | 0 | 0.036188  | -1.398497 | -4.842594 |
| 147 | 6 | 0 | -1.191161 | -0.720766 | -4.840618 |
| 148 | 1 | 0 | -2.106978 | -1.306202 | -4.849272 |
| 149 | 6 | 0 | 0.084606  | -2.873496 | -4.882249 |
| 150 | 1 | 0 | 1.089543  | -3.319466 | -4.820085 |
| 151 | 6 | 0 | -0.792343 | -5.022403 | -5.076229 |
| 152 | 1 | 0 | 0.266528  | -5.314487 | -4.954970 |
| 153 | 6 | 0 | -1.583313 | -5.677940 | -3.933306 |
| 154 | 1 | 0 | -2.633166 | -5.345074 | -4.024565 |
| 155 | 6 | 0 | -1.522681 | -7.205476 | -4.044743 |
| 156 | 1 | 0 | -2.105433 | -7.642543 | -3.226589 |
| 157 | 1 | 0 | -0.480973 | -7.518476 | -3.896433 |
| 158 | 6 | 0 | -2.029983 | -7.691794 | -5.402559 |
| 159 | 1 | 0 | -3.093643 | -7.437805 | -5.507260 |
| 160 | 1 | 0 | -1.957265 | -8.782937 | -5.460677 |
| 161 | 6 | 0 | -1.243257 | -7.038887 | -6.540343 |
| 162 | 1 | 0 | -0.196208 | -7.367543 | -6.490248 |
| 163 | 1 | 0 | -1.631040 | -7.362418 | -7.512041 |
| 164 | 6 | 0 | -1.302856 | -5.514779 | -6.435035 |
| 165 | 1 | 0 | -2.336945 | -5.167630 | -6.558679 |

|     |    |   |           |           |           |
|-----|----|---|-----------|-----------|-----------|
| 166 | 1  | 0 | -0.711810 | -5.041613 | -7.226726 |
| 167 | 6  | 0 | -1.755133 | -4.671555 | -1.839792 |
| 168 | 1  | 0 | -2.808816 | -4.445088 | -2.065878 |
| 169 | 16 | 0 | -0.000000 | 0.000000  | 5.343874  |
| 170 | 9  | 0 | -1.131206 | -0.622586 | 6.253462  |
| 171 | 9  | 0 | 1.131293  | 0.619863  | 4.429532  |
| 172 | 9  | 0 | -1.102464 | 0.669797  | 4.429532  |
| 173 | 9  | 0 | -0.028829 | -1.289660 | 4.429532  |
| 174 | 9  | 0 | 1.104778  | -0.668360 | 6.253462  |
| 175 | 9  | 0 | 0.026428  | 1.290946  | 6.253462  |

SF6@CC3-TS C1 cc3-rsf6ty

Standard orientation:

| Center<br>Number | Atomic<br>Number | Atomic<br>Type | Coordinates (Angstroms) |           |           |
|------------------|------------------|----------------|-------------------------|-----------|-----------|
|                  |                  |                | X                       | Y         | Z         |
| 1                | 7                | 0              | 2.223415                | 2.200169  | 4.476272  |
| 2                | 7                | 0              | 2.670737                | 4.127695  | 2.381106  |
| 3                | 7                | 0              | -2.415610               | 5.276552  | -1.380248 |
| 4                | 7                | 0              | -4.784137               | 3.632232  | -1.437156 |
| 5                | 6                | 0              | 0.161153                | 0.209916  | 4.342569  |
| 6                | 1                | 0              | -0.105874               | 1.204471  | 4.690421  |
| 7                | 6                | 0              | 1.477659                | -0.017798 | 3.917559  |
| 8                | 6                | 0              | 2.480862                | 1.064048  | 3.975366  |
| 9                | 1                | 0              | 3.475452                | 0.816881  | 3.576249  |
| 10               | 6                | 0              | 3.295929                | 3.174292  | 4.527496  |
| 11               | 1                | 0              | 4.208287                | 2.798126  | 4.029823  |
| 12               | 6                | 0              | 2.857494                | 4.444915  | 3.782934  |
| 13               | 1                | 0              | 1.917778                | 4.793646  | 4.248324  |
| 14               | 6                | 0              | 3.924751                | 5.537582  | 3.911163  |
| 15               | 1                | 0              | 3.579131                | 6.432881  | 3.382961  |
| 16               | 1                | 0              | 4.830831                | 5.193357  | 3.395691  |
| 17               | 6                | 0              | 4.238535                | 5.849270  | 5.374864  |
| 18               | 1                | 0              | 5.016322                | 6.617796  | 5.435483  |
| 19               | 1                | 0              | 3.343907                | 6.263139  | 5.859834  |
| 20               | 6                | 0              | 4.673074                | 4.584614  | 6.117440  |
| 21               | 1                | 0              | 4.863145                | 4.804170  | 7.173336  |
| 22               | 1                | 0              | 5.619457                | 4.223592  | 5.692186  |
| 23               | 6                | 0              | 3.610973                | 3.491879  | 5.993657  |
| 24               | 1                | 0              | 2.681357                | 3.811434  | 6.482412  |
| 25               | 1                | 0              | 3.932505                | 2.571321  | 6.492911  |
| 26               | 6                | 0              | 1.529748                | 4.340087  | 1.870802  |
| 27               | 1                | 0              | 0.692427                | 4.743923  | 2.461021  |
| 28               | 6                | 0              | 1.244478                | 4.078336  | 0.446092  |
| 29               | 6                | 0              | 2.216358                | 3.496440  | -0.378983 |
| 30               | 1                | 0              | 3.177583                | 3.237336  | 0.055943  |
| 31               | 6                | 0              | 1.954316                | 3.266445  | -1.723744 |
| 32               | 6                | 0              | 0.707002                | 3.622039  | -2.255490 |
| 33               | 1                | 0              | 0.521084                | 3.440849  | -3.311113 |
| 34               | 6                | 0              | -0.260048               | 4.209132  | -1.448602 |
| 35               | 6                | 0              | 0.013062                | 4.431290  | -0.091193 |
| 36               | 1                | 0              | -0.754942               | 4.893862  | 0.523383  |
| 37               | 6                | 0              | -1.548349               | 4.625639  | -2.037146 |
| 38               | 1                | 0              | -1.700551               | 4.353576  | -3.093308 |
| 39               | 6                | 0              | -3.627195               | 5.675727  | -2.068999 |
| 40               | 1                | 0              | -3.646843               | 5.296411  | -3.106776 |
| 41               | 6                | 0              | -4.839598               | 5.077413  | -1.338563 |

|     |   |   |           |           |           |
|-----|---|---|-----------|-----------|-----------|
| 42  | 1 | 0 | -4.791388 | 5.414002  | -0.287086 |
| 43  | 6 | 0 | -6.145955 | 5.570365  | -1.970987 |
| 44  | 1 | 0 | -6.989324 | 5.138883  | -1.420931 |
| 45  | 1 | 0 | -6.199519 | 5.178565  | -2.995091 |
| 46  | 6 | 0 | -6.222906 | 7.097206  | -1.987305 |
| 47  | 1 | 0 | -6.243615 | 7.473004  | -0.955235 |
| 48  | 1 | 0 | -7.155917 | 7.419935  | -2.461214 |
| 49  | 6 | 0 | -5.016139 | 7.692584  | -2.714604 |
| 50  | 1 | 0 | -5.046876 | 7.391860  | -3.770743 |
| 51  | 1 | 0 | -5.056114 | 8.786786  | -2.695138 |
| 52  | 6 | 0 | -3.710393 | 7.206126  | -2.085274 |
| 53  | 1 | 0 | -3.633660 | 7.564157  | -1.050343 |
| 54  | 1 | 0 | -2.842068 | 7.601336  | -2.623614 |
| 55  | 6 | 0 | -4.755015 | 2.965696  | -0.359149 |
| 56  | 1 | 0 | -4.758990 | 3.453321  | 0.628189  |
| 57  | 7 | 0 | 2.492889  | -4.023482 | 2.786281  |
| 58  | 7 | 0 | 2.370190  | -5.003198 | 0.084238  |
| 59  | 7 | 0 | 3.160982  | -0.359274 | -4.311840 |
| 60  | 7 | 0 | 2.852383  | 2.467549  | -3.814499 |
| 61  | 6 | 0 | 1.847269  | -1.283109 | 3.476235  |
| 62  | 1 | 0 | 2.862446  | -1.486167 | 3.143955  |
| 63  | 6 | 0 | 0.914526  | -2.330521 | 3.466964  |
| 64  | 6 | 0 | 1.298606  | -3.696041 | 3.058515  |
| 65  | 1 | 0 | 0.475956  | -4.427614 | 3.030088  |
| 66  | 6 | 0 | 2.742739  | -5.412969 | 2.451852  |
| 67  | 1 | 0 | 1.806360  | -5.999912 | 2.445699  |
| 68  | 6 | 0 | 3.342492  | -5.497010 | 1.040019  |
| 69  | 1 | 0 | 4.261837  | -4.883577 | 1.033262  |
| 70  | 6 | 0 | 3.699448  | -6.947178 | 0.696147  |
| 71  | 1 | 0 | 4.132801  | -6.975530 | -0.309595 |
| 72  | 1 | 0 | 2.770080  | -7.530425 | 0.659719  |
| 73  | 6 | 0 | 4.658418  | -7.547304 | 1.725027  |
| 74  | 1 | 0 | 4.881242  | -8.588059 | 1.467260  |
| 75  | 1 | 0 | 5.611344  | -7.001474 | 1.696361  |
| 76  | 6 | 0 | 4.069836  | -7.456803 | 3.134185  |
| 77  | 1 | 0 | 4.775281  | -7.853570 | 3.871868  |
| 78  | 1 | 0 | 3.167686  | -8.081261 | 3.188895  |
| 79  | 6 | 0 | 3.708205  | -6.011888 | 3.480305  |
| 80  | 1 | 0 | 4.612986  | -5.390658 | 3.504462  |
| 81  | 1 | 0 | 3.251442  | -5.947589 | 4.473875  |
| 82  | 6 | 0 | 2.722103  | -4.036340 | -0.656804 |
| 83  | 1 | 0 | 3.721843  | -3.585848 | -0.582707 |
| 84  | 6 | 0 | 1.834919  | -3.454373 | -1.682265 |
| 85  | 6 | 0 | 0.538273  | -3.951234 | -1.874387 |
| 86  | 1 | 0 | 0.195551  | -4.764979 | -1.240367 |
| 87  | 6 | 0 | -0.278724 | -3.423850 | -2.866407 |
| 88  | 6 | 0 | 0.198544  | -2.379602 | -3.670843 |
| 89  | 1 | 0 | -0.451299 | -1.984119 | -4.447272 |
| 90  | 6 | 0 | 1.479810  | -1.875135 | -3.484974 |
| 91  | 6 | 0 | 2.297880  | -2.417928 | -2.484156 |
| 92  | 1 | 0 | 3.300949  | -2.018522 | -2.360275 |
| 93  | 6 | 0 | 1.975129  | -0.804283 | -4.372014 |
| 94  | 1 | 0 | 1.250747  | -0.429060 | -5.111643 |
| 95  | 6 | 0 | 3.545675  | 0.651148  | -5.278899 |
| 96  | 1 | 0 | 2.697992  | 0.926093  | -5.932492 |
| 97  | 6 | 0 | 3.984403  | 1.924458  | -4.541468 |
| 98  | 1 | 0 | 4.806879  | 1.647337  | -3.857696 |
| 99  | 6 | 0 | 4.488396  | 2.973545  | -5.539495 |
| 100 | 1 | 0 | 4.804265  | 3.864235  | -4.985357 |

|     |   |   |           |           |           |
|-----|---|---|-----------|-----------|-----------|
| 101 | 1 | 0 | 3.645730  | 3.275532  | -6.175122 |
| 102 | 6 | 0 | 5.628752  | 2.428527  | -6.400003 |
| 103 | 1 | 0 | 6.492232  | 2.202510  | -5.759596 |
| 104 | 1 | 0 | 5.955198  | 3.190582  | -7.115544 |
| 105 | 6 | 0 | 5.197682  | 1.155114  | -7.129633 |
| 106 | 1 | 0 | 4.397132  | 1.400089  | -7.840912 |
| 107 | 1 | 0 | 6.028312  | 0.747300  | -7.715312 |
| 108 | 6 | 0 | 4.692216  | 0.106828  | -6.137960 |
| 109 | 1 | 0 | 5.504917  | -0.203002 | -5.467963 |
| 110 | 1 | 0 | 4.347990  | -0.793762 | -6.657959 |
| 111 | 6 | 0 | 3.006491  | 2.677343  | -2.573587 |
| 112 | 1 | 0 | 3.951214  | 2.446543  | -2.061021 |
| 113 | 7 | 0 | -2.996623 | -1.496913 | 4.949614  |
| 114 | 7 | 0 | -5.209115 | -0.716032 | 3.272418  |
| 115 | 7 | 0 | -4.778342 | -2.632459 | -2.849515 |
| 116 | 7 | 0 | -2.361331 | -3.645493 | -4.053455 |
| 117 | 6 | 0 | -0.387282 | -2.092515 | 3.890393  |
| 118 | 1 | 0 | -1.126379 | -2.889480 | 3.899492  |
| 119 | 6 | 0 | -0.771257 | -0.819279 | 4.332712  |
| 120 | 6 | 0 | -2.140729 | -0.570059 | 4.824375  |
| 121 | 1 | 0 | -2.367103 | 0.472740  | 5.096377  |
| 122 | 6 | 0 | -4.297662 | -1.147547 | 5.485337  |
| 123 | 1 | 0 | -4.381749 | -0.060925 | 5.668180  |
| 124 | 6 | 0 | -5.380446 | -1.525775 | 4.462604  |
| 125 | 1 | 0 | -5.264248 | -2.602097 | 4.240713  |
| 126 | 6 | 0 | -6.777351 | -1.273438 | 5.040825  |
| 127 | 1 | 0 | -7.525852 | -1.564936 | 4.295979  |
| 128 | 1 | 0 | -6.891297 | -0.193409 | 5.201235  |
| 129 | 6 | 0 | -6.987442 | -2.025303 | 6.355541  |
| 130 | 1 | 0 | -7.984710 | -1.811051 | 6.754053  |
| 131 | 1 | 0 | -6.945188 | -3.106987 | 6.168471  |
| 132 | 6 | 0 | -5.909160 | -1.649046 | 7.373066  |
| 133 | 1 | 0 | -6.041848 | -2.214127 | 8.301687  |
| 134 | 1 | 0 | -6.010801 | -0.585869 | 7.630232  |
| 135 | 6 | 0 | -4.513891 | -1.902385 | 6.801782  |
| 136 | 1 | 0 | -4.373357 | -2.974010 | 6.609326  |
| 137 | 1 | 0 | -3.736335 | -1.602305 | 7.512673  |
| 138 | 6 | 0 | -5.015335 | -1.314404 | 2.171661  |
| 139 | 1 | 0 | -4.964941 | -2.412468 | 2.105967  |
| 140 | 6 | 0 | -4.868007 | -0.589327 | 0.894074  |
| 141 | 6 | 0 | -4.841675 | 0.812185  | 0.864564  |
| 142 | 1 | 0 | -4.913862 | 1.352181  | 1.805173  |
| 143 | 6 | 0 | -4.740108 | 1.489590  | -0.343967 |
| 144 | 6 | 0 | -4.657362 | 0.761501  | -1.539148 |
| 145 | 1 | 0 | -4.584650 | 1.308350  | -2.475737 |
| 146 | 6 | 0 | -4.683059 | -0.627269 | -1.521467 |
| 147 | 6 | 0 | -4.786187 | -1.301025 | -0.296214 |
| 148 | 1 | 0 | -4.811341 | -2.387713 | -0.302027 |
| 149 | 6 | 0 | -4.636706 | -1.373852 | -2.794043 |
| 150 | 1 | 0 | -4.490860 | -0.763681 | -3.699096 |
| 151 | 6 | 0 | -4.761129 | -3.256499 | -4.158030 |
| 152 | 1 | 0 | -4.551419 | -2.520219 | -4.954996 |
| 153 | 6 | 0 | -3.642483 | -4.308820 | -4.198247 |
| 154 | 1 | 0 | -3.826415 | -5.018222 | -3.371105 |
| 155 | 6 | 0 | -3.664768 | -5.066022 | -5.530804 |
| 156 | 1 | 0 | -2.866237 | -5.815894 | -5.524312 |
| 157 | 1 | 0 | -3.427769 | -4.355001 | -6.332944 |
| 158 | 6 | 0 | -5.025794 | -5.713824 | -5.787113 |
| 159 | 1 | 0 | -5.217431 | -6.476262 | -5.019796 |

|     |    |   |           |           |           |
|-----|----|---|-----------|-----------|-----------|
| 160 | 1  | 0 | -5.018734 | -6.230247 | -6.752769 |
| 161 | 6  | 0 | -6.140673 | -4.667335 | -5.745027 |
| 162 | 1  | 0 | -6.000477 | -3.957393 | -6.571552 |
| 163 | 1  | 0 | -7.117554 | -5.139178 | -5.894371 |
| 164 | 6  | 0 | -6.123205 | -3.910304 | -4.416789 |
| 165 | 1  | 0 | -6.336564 | -4.597257 | -3.587487 |
| 166 | 1  | 0 | -6.896860 | -3.135066 | -4.394685 |
| 167 | 6  | 0 | -1.621841 | -3.996116 | -3.085231 |
| 168 | 1  | 0 | -1.934130 | -4.766740 | -2.363216 |
| 169 | 16 | 0 | 4.826138  | 0.120651  | -0.092030 |
| 170 | 9  | 0 | 4.463527  | -1.418904 | -0.098255 |
| 171 | 9  | 0 | 5.196217  | 1.661321  | -0.077851 |
| 172 | 9  | 0 | 4.628218  | 0.156947  | 1.477823  |
| 173 | 9  | 0 | 3.306157  | 0.486024  | -0.294455 |
| 174 | 9  | 0 | 5.025980  | 0.083008  | -1.658663 |
| 175 | 9  | 0 | 6.351359  | -0.241161 | 0.112472  |

SF6@CC3 T cc3-rsf6c

Standard orientation:

| Center<br>Number | Atomic<br>Number | Atomic<br>Type | Coordinates (Angstroms) |           |           |
|------------------|------------------|----------------|-------------------------|-----------|-----------|
|                  |                  |                | X                       | Y         | Z         |
| 1                | 7                | 0              | 5.535780                | 0.904140  | -1.113576 |
| 2                | 7                | 0              | 5.535780                | -0.904140 | 1.113576  |
| 3                | 7                | 0              | 1.113576                | -5.535780 | 0.904140  |
| 4                | 7                | 0              | -1.113576               | -5.535780 | -0.904140 |
| 5                | 6                | 0              | 3.164505                | 1.272750  | -2.692203 |
| 6                | 1                | 0              | 3.802212                | 0.423579  | -2.924050 |
| 7                | 6                | 0              | 3.486048                | 2.068279  | -1.583240 |
| 8                | 6                | 0              | 4.684500                | 1.779236  | -0.771924 |
| 9                | 1                | 0              | 4.807366                | 2.389847  | 0.136089  |
| 10               | 6                | 0              | 6.697084                | 0.720945  | -0.266600 |
| 11               | 1                | 0              | 6.671828                | 1.395691  | 0.608224  |
| 12               | 6                | 0              | 6.697084                | -0.720945 | 0.266600  |
| 13               | 1                | 0              | 6.671828                | -1.395691 | -0.608224 |
| 14               | 6                | 0              | 7.964933                | -0.992156 | 1.083062  |
| 15               | 1                | 0              | 7.942747                | -2.028178 | 1.438114  |
| 16               | 1                | 0              | 7.943161                | -0.349664 | 1.972893  |
| 17               | 6                | 0              | 9.228002                | -0.717049 | 0.266303  |
| 18               | 1                | 0              | 10.117149               | -0.900253 | 0.878727  |
| 19               | 1                | 0              | 9.275032                | -1.416049 | -0.579890 |
| 20               | 6                | 0              | 9.228002                | 0.717049  | -0.266303 |
| 21               | 1                | 0              | 10.117149               | 0.900253  | -0.878727 |
| 22               | 1                | 0              | 9.275032                | 1.416049  | 0.579890  |
| 23               | 6                | 0              | 7.964933                | 0.992156  | -1.083062 |
| 24               | 1                | 0              | 7.943161                | 0.349664  | -1.972893 |
| 25               | 1                | 0              | 7.942747                | 2.028178  | -1.438114 |
| 26               | 6                | 0              | 4.684500                | -1.779236 | 0.771924  |
| 27               | 1                | 0              | 4.807366                | -2.389847 | -0.136089 |
| 28               | 6                | 0              | 3.486048                | -2.068279 | 1.583240  |
| 29               | 6                | 0              | 3.164505                | -1.272750 | 2.692203  |
| 30               | 1                | 0              | 3.802212                | -0.423579 | 2.924050  |
| 31               | 6                | 0              | 2.068279                | -1.583240 | 3.486048  |
| 32               | 6                | 0              | 1.272750                | -2.692203 | 3.164505  |
| 33               | 1                | 0              | 0.423579                | -2.924050 | 3.802212  |
| 34               | 6                | 0              | 1.583240                | -3.486048 | 2.068279  |
| 35               | 6                | 0              | 2.692203                | -3.164505 | 1.272750  |

|    |   |   |           |            |           |
|----|---|---|-----------|------------|-----------|
| 36 | 1 | 0 | 2.924050  | -3.802212  | 0.423579  |
| 37 | 6 | 0 | 0.771924  | -4.684500  | 1.779236  |
| 38 | 1 | 0 | -0.136089 | -4.807366  | 2.389847  |
| 39 | 6 | 0 | 0.266600  | -6.697084  | 0.720945  |
| 40 | 1 | 0 | -0.608224 | -6.671828  | 1.395691  |
| 41 | 6 | 0 | -0.266600 | -6.697084  | -0.720945 |
| 42 | 1 | 0 | 0.608224  | -6.671828  | -1.395691 |
| 43 | 6 | 0 | -1.083062 | -7.964933  | -0.992156 |
| 44 | 1 | 0 | -1.438114 | -7.942747  | -2.028178 |
| 45 | 1 | 0 | -1.972893 | -7.943161  | -0.349664 |
| 46 | 6 | 0 | -0.266303 | -9.228002  | -0.717049 |
| 47 | 1 | 0 | 0.579890  | -9.275032  | -1.416049 |
| 48 | 1 | 0 | -0.878727 | -10.117149 | -0.900253 |
| 49 | 6 | 0 | 0.266303  | -9.228002  | 0.717049  |
| 50 | 1 | 0 | -0.579890 | -9.275032  | 1.416049  |
| 51 | 1 | 0 | 0.878727  | -10.117149 | 0.900253  |
| 52 | 6 | 0 | 1.083062  | -7.964933  | 0.992156  |
| 53 | 1 | 0 | 1.972893  | -7.943161  | 0.349664  |
| 54 | 1 | 0 | 1.438114  | -7.942747  | 2.028178  |
| 55 | 6 | 0 | -0.771924 | -4.684500  | -1.779236 |
| 56 | 1 | 0 | 0.136089  | -4.807366  | -2.389847 |
| 57 | 7 | 0 | 1.113576  | 5.535780   | -0.904140 |
| 58 | 7 | 0 | -1.113576 | 5.535780   | 0.904140  |
| 59 | 7 | 0 | -0.904140 | 1.113576   | 5.535780  |
| 60 | 7 | 0 | 0.904140  | -1.113576  | 5.535780  |
| 61 | 6 | 0 | 2.692203  | 3.164505   | -1.272750 |
| 62 | 1 | 0 | 2.924050  | 3.802212   | -0.423579 |
| 63 | 6 | 0 | 1.583240  | 3.486048   | -2.068279 |
| 64 | 6 | 0 | 0.771924  | 4.684500   | -1.779236 |
| 65 | 1 | 0 | -0.136089 | 4.807366   | -2.389847 |
| 66 | 6 | 0 | 0.266600  | 6.697084   | -0.720945 |
| 67 | 1 | 0 | -0.608224 | 6.671828   | -1.395691 |
| 68 | 6 | 0 | -0.266600 | 6.697084   | 0.720945  |
| 69 | 1 | 0 | 0.608224  | 6.671828   | 1.395691  |
| 70 | 6 | 0 | -1.083062 | 7.964933   | 0.992156  |
| 71 | 1 | 0 | -1.438114 | 7.942747   | 2.028178  |
| 72 | 1 | 0 | -1.972893 | 7.943161   | 0.349664  |
| 73 | 6 | 0 | -0.266303 | 9.228002   | 0.717049  |
| 74 | 1 | 0 | -0.878727 | 10.117149  | 0.900253  |
| 75 | 1 | 0 | 0.579890  | 9.275032   | 1.416049  |
| 76 | 6 | 0 | 0.266303  | 9.228002   | -0.717049 |
| 77 | 1 | 0 | 0.878727  | 10.117149  | -0.900253 |
| 78 | 1 | 0 | -0.579890 | 9.275032   | -1.416049 |
| 79 | 6 | 0 | 1.083062  | 7.964933   | -0.992156 |
| 80 | 1 | 0 | 1.972893  | 7.943161   | -0.349664 |
| 81 | 1 | 0 | 1.438114  | 7.942747   | -2.028178 |
| 82 | 6 | 0 | -0.771924 | 4.684500   | 1.779236  |
| 83 | 1 | 0 | 0.136089  | 4.807366   | 2.389847  |
| 84 | 6 | 0 | -1.583240 | 3.486048   | 2.068279  |
| 85 | 6 | 0 | -2.692203 | 3.164505   | 1.272750  |
| 86 | 1 | 0 | -2.924050 | 3.802212   | 0.423579  |
| 87 | 6 | 0 | -3.486048 | 2.068279   | 1.583240  |
| 88 | 6 | 0 | -3.164505 | 1.272750   | 2.692203  |
| 89 | 1 | 0 | -3.802212 | 0.423579   | 2.924050  |
| 90 | 6 | 0 | -2.068279 | 1.583240   | 3.486048  |
| 91 | 6 | 0 | -1.272750 | 2.692203   | 3.164505  |
| 92 | 1 | 0 | -0.423579 | 2.924050   | 3.802212  |
| 93 | 6 | 0 | -1.779236 | 0.771924   | 4.684500  |
| 94 | 1 | 0 | -2.389847 | -0.136089  | 4.807366  |



|     |   |   |           |           |            |
|-----|---|---|-----------|-----------|------------|
| 95  | 6 | 0 | -0.720945 | 0.266600  | 6.697084   |
| 96  | 1 | 0 | -1.395691 | -0.608224 | 6.671828   |
| 97  | 6 | 0 | 0.720945  | -0.266600 | 6.697084   |
| 98  | 1 | 0 | 1.395691  | 0.608224  | 6.671828   |
| 99  | 6 | 0 | 0.992156  | -1.083062 | 7.964933   |
| 100 | 1 | 0 | 2.028178  | -1.438114 | 7.942747   |
| 101 | 1 | 0 | 0.349664  | -1.972893 | 7.943161   |
| 102 | 6 | 0 | 0.717049  | -0.266303 | 9.228002   |
| 103 | 1 | 0 | 1.416049  | 0.579890  | 9.275032   |
| 104 | 1 | 0 | 0.900253  | -0.878727 | 10.117149  |
| 105 | 6 | 0 | -0.717049 | 0.266303  | 9.228002   |
| 106 | 1 | 0 | -1.416049 | -0.579890 | 9.275032   |
| 107 | 1 | 0 | -0.900253 | 0.878727  | 10.117149  |
| 108 | 6 | 0 | -0.992156 | 1.083062  | 7.964933   |
| 109 | 1 | 0 | -0.349664 | 1.972893  | 7.943161   |
| 110 | 1 | 0 | -2.028178 | 1.438114  | 7.942747   |
| 111 | 6 | 0 | 1.779236  | -0.771924 | 4.684500   |
| 112 | 1 | 0 | 2.389847  | 0.136089  | 4.807366   |
| 113 | 7 | 0 | 0.904140  | 1.113576  | -5.535780  |
| 114 | 7 | 0 | -0.904140 | -1.113576 | -5.535780  |
| 115 | 7 | 0 | -5.535780 | -0.904140 | -1.113576  |
| 116 | 7 | 0 | -5.535780 | 0.904140  | 1.113576   |
| 117 | 6 | 0 | 1.272750  | 2.692203  | -3.164505  |
| 118 | 1 | 0 | 0.423579  | 2.924050  | -3.802212  |
| 119 | 6 | 0 | 2.068279  | 1.583240  | -3.486048  |
| 120 | 6 | 0 | 1.779236  | 0.771924  | -4.684500  |
| 121 | 1 | 0 | 2.389847  | -0.136089 | -4.807366  |
| 122 | 6 | 0 | 0.720945  | 0.266600  | -6.697084  |
| 123 | 1 | 0 | 1.395691  | -0.608224 | -6.671828  |
| 124 | 6 | 0 | -0.720945 | -0.266600 | -6.697084  |
| 125 | 1 | 0 | -1.395691 | 0.608224  | -6.671828  |
| 126 | 6 | 0 | -0.992156 | -1.083062 | -7.964933  |
| 127 | 1 | 0 | -2.028178 | -1.438114 | -7.942747  |
| 128 | 1 | 0 | -0.349664 | -1.972893 | -7.943161  |
| 129 | 6 | 0 | -0.717049 | -0.266303 | -9.228002  |
| 130 | 1 | 0 | -0.900253 | -0.878727 | -10.117149 |
| 131 | 1 | 0 | -1.416049 | 0.579890  | -9.275032  |
| 132 | 6 | 0 | 0.717049  | 0.266303  | -9.228002  |
| 133 | 1 | 0 | 0.900253  | 0.878727  | -10.117149 |
| 134 | 1 | 0 | 1.416049  | -0.579890 | -9.275032  |
| 135 | 6 | 0 | 0.992156  | 1.083062  | -7.964933  |
| 136 | 1 | 0 | 0.349664  | 1.972893  | -7.943161  |
| 137 | 1 | 0 | 2.028178  | 1.438114  | -7.942747  |
| 138 | 6 | 0 | -1.779236 | -0.771924 | -4.684500  |
| 139 | 1 | 0 | -2.389847 | 0.136089  | -4.807366  |
| 140 | 6 | 0 | -2.068279 | -1.583240 | -3.486048  |
| 141 | 6 | 0 | -1.272750 | -2.692203 | -3.164505  |
| 142 | 1 | 0 | -0.423579 | -2.924050 | -3.802212  |
| 143 | 6 | 0 | -1.583240 | -3.486048 | -2.068279  |
| 144 | 6 | 0 | -2.692203 | -3.164505 | -1.272750  |
| 145 | 1 | 0 | -2.924050 | -3.802212 | -0.423579  |
| 146 | 6 | 0 | -3.486048 | -2.068279 | -1.583240  |
| 147 | 6 | 0 | -3.164505 | -1.272750 | -2.692203  |
| 148 | 1 | 0 | -3.802212 | -0.423579 | -2.924050  |
| 149 | 6 | 0 | -4.684500 | -1.779236 | -0.771924  |
| 150 | 1 | 0 | -4.807366 | -2.389847 | 0.136089   |
| 151 | 6 | 0 | -6.697084 | -0.720945 | -0.266600  |
| 152 | 1 | 0 | -6.671828 | -1.395691 | 0.608224   |
| 153 | 6 | 0 | -6.697084 | 0.720945  | 0.266600   |

|     |    |   |            |           |           |
|-----|----|---|------------|-----------|-----------|
| 154 | 1  | 0 | -6.671828  | 1.395691  | -0.608224 |
| 155 | 6  | 0 | -7.964933  | 0.992156  | 1.083062  |
| 156 | 1  | 0 | -7.942747  | 2.028178  | 1.438114  |
| 157 | 1  | 0 | -7.943161  | 0.349664  | 1.972893  |
| 158 | 6  | 0 | -9.228002  | 0.717049  | 0.266303  |
| 159 | 1  | 0 | -9.275032  | 1.416049  | -0.579890 |
| 160 | 1  | 0 | -10.117149 | 0.900253  | 0.878727  |
| 161 | 6  | 0 | -9.228002  | -0.717049 | -0.266303 |
| 162 | 1  | 0 | -9.275032  | -1.416049 | 0.579890  |
| 163 | 1  | 0 | -10.117149 | -0.900253 | -0.878727 |
| 164 | 6  | 0 | -7.964933  | -0.992156 | -1.083062 |
| 165 | 1  | 0 | -7.943161  | -0.349664 | -1.972893 |
| 166 | 1  | 0 | -7.942747  | -2.028178 | -1.438114 |
| 167 | 6  | 0 | -4.684500  | 1.779236  | 0.771924  |
| 168 | 1  | 0 | -4.807366  | 2.389847  | -0.136089 |
| 169 | 16 | 0 | 0.000000   | 0.000000  | 0.000000  |
| 170 | 9  | 0 | -0.000000  | 1.581528  | 0.000000  |
| 171 | 9  | 0 | -0.000000  | -1.581528 | -0.000000 |
| 172 | 9  | 0 | 0.000000   | 0.000000  | -1.581528 |
| 173 | 9  | 0 | -1.581528  | 0.000000  | -0.000000 |
| 174 | 9  | 0 | 0.000000   | -0.000000 | 1.581528  |
| 175 | 9  | 0 | 1.581528   | -0.000000 | -0.000000 |

4SF6@CC3 T cc3-rsf6by

Standard orientation:

| Center<br>Number | Atomic<br>Number | Atomic<br>Type | Coordinates (Angstroms) |           |           |
|------------------|------------------|----------------|-------------------------|-----------|-----------|
|                  |                  |                | X                       | Y         | Z         |
| 1                | 7                | 0              | 0.883652                | 5.561970  | -1.143318 |
| 2                | 7                | 0              | -0.883652               | 5.561970  | 1.143318  |
| 3                | 7                | 0              | -5.561970               | 1.143318  | 0.883652  |
| 4                | 7                | 0              | -5.561970               | -1.143318 | -0.883652 |
| 5                | 6                | 0              | 1.392104                | 3.277977  | -2.825184 |
| 6                | 1                | 0              | 0.543629                | 3.911482  | -3.067485 |
| 7                | 6                | 0              | 2.175269                | 3.608651  | -1.710862 |
| 8                | 6                | 0              | 1.859349                | 4.793192  | -0.888871 |
| 9                | 1                | 0              | 2.536763                | 4.975953  | -0.041026 |
| 10               | 6                | 0              | 0.710781                | 6.722106  | -0.289320 |
| 11               | 1                | 0              | 1.414837                | 6.703079  | 0.562336  |
| 12               | 6                | 0              | -0.710781               | 6.722106  | 0.289320  |
| 13               | 1                | 0              | -1.414837               | 6.703079  | -0.562336 |
| 14               | 6                | 0              | -0.953094               | 7.990175  | 1.116289  |
| 15               | 1                | 0              | -1.976867               | 7.967155  | 1.505496  |
| 16               | 1                | 0              | -0.281405               | 7.967929  | 1.984426  |
| 17               | 6                | 0              | -0.706816               | 9.254296  | 0.292121  |
| 18               | 1                | 0              | -0.867129               | 10.142680 | 0.912060  |
| 19               | 1                | 0              | -1.436139               | 9.302627  | -0.527949 |
| 20               | 6                | 0              | 0.706816                | 9.254296  | -0.292121 |
| 21               | 1                | 0              | 0.867129                | 10.142680 | -0.912060 |
| 22               | 1                | 0              | 1.436139                | 9.302627  | 0.527949  |
| 23               | 6                | 0              | 0.953094                | 7.990175  | -1.116289 |
| 24               | 1                | 0              | 0.281405                | 7.967929  | -1.984426 |
| 25               | 1                | 0              | 1.976867                | 7.967155  | -1.505496 |
| 26               | 6                | 0              | -1.859349               | 4.793192  | 0.888871  |
| 27               | 1                | 0              | -2.536763               | 4.975953  | 0.041026  |
| 28               | 6                | 0              | -2.175269               | 3.608651  | 1.710862  |
| 29               | 6                | 0              | -1.392104               | 3.277977  | 2.825184  |

|    |   |   |            |           |           |
|----|---|---|------------|-----------|-----------|
| 30 | 1 | 0 | -0.543629  | 3.911482  | 3.067485  |
| 31 | 6 | 0 | -1.710862  | 2.175269  | 3.608651  |
| 32 | 6 | 0 | -2.825184  | 1.392104  | 3.277977  |
| 33 | 1 | 0 | -3.067485  | 0.543629  | 3.911482  |
| 34 | 6 | 0 | -3.608651  | 1.710862  | 2.175269  |
| 35 | 6 | 0 | -3.277977  | 2.825184  | 1.392104  |
| 36 | 1 | 0 | -3.911482  | 3.067485  | 0.543629  |
| 37 | 6 | 0 | -4.793192  | 0.888871  | 1.859349  |
| 38 | 1 | 0 | -4.975953  | 0.041026  | 2.536763  |
| 39 | 6 | 0 | -6.722106  | 0.289320  | 0.710781  |
| 40 | 1 | 0 | -6.703079  | -0.562336 | 1.414837  |
| 41 | 6 | 0 | -6.722106  | -0.289320 | -0.710781 |
| 42 | 1 | 0 | -6.703079  | 0.562336  | -1.414837 |
| 43 | 6 | 0 | -7.990175  | -1.116289 | -0.953094 |
| 44 | 1 | 0 | -7.967155  | -1.505496 | -1.976867 |
| 45 | 1 | 0 | -7.967929  | -1.984426 | -0.281405 |
| 46 | 6 | 0 | -9.254296  | -0.292121 | -0.706816 |
| 47 | 1 | 0 | -9.302627  | 0.527949  | -1.436139 |
| 48 | 1 | 0 | -10.142680 | -0.912060 | -0.867129 |
| 49 | 6 | 0 | -9.254296  | 0.292121  | 0.706816  |
| 50 | 1 | 0 | -9.302627  | -0.527949 | 1.436139  |
| 51 | 1 | 0 | -10.142680 | 0.912060  | 0.867129  |
| 52 | 6 | 0 | -7.990175  | 1.116289  | 0.953094  |
| 53 | 1 | 0 | -7.967929  | 1.984426  | 0.281405  |
| 54 | 1 | 0 | -7.967155  | 1.505496  | 1.976867  |
| 55 | 6 | 0 | -4.793192  | -0.888871 | -1.859349 |
| 56 | 1 | 0 | -4.975953  | -0.041026 | -2.536763 |
| 57 | 7 | 0 | 5.561970   | 1.143318  | -0.883652 |
| 58 | 7 | 0 | 5.561970   | -1.143318 | 0.883652  |
| 59 | 7 | 0 | 1.143318   | -0.883652 | 5.561970  |
| 60 | 7 | 0 | -1.143318  | 0.883652  | 5.561970  |
| 61 | 6 | 0 | 3.277977   | 2.825184  | -1.392104 |
| 62 | 1 | 0 | 3.911482   | 3.067485  | -0.543629 |
| 63 | 6 | 0 | 3.608651   | 1.710862  | -2.175269 |
| 64 | 6 | 0 | 4.793192   | 0.888871  | -1.859349 |
| 65 | 1 | 0 | 4.975953   | 0.041026  | -2.536763 |
| 66 | 6 | 0 | 6.722106   | 0.289320  | -0.710781 |
| 67 | 1 | 0 | 6.703079   | -0.562336 | -1.414837 |
| 68 | 6 | 0 | 6.722106   | -0.289320 | 0.710781  |
| 69 | 1 | 0 | 6.703079   | 0.562336  | 1.414837  |
| 70 | 6 | 0 | 7.990175   | -1.116289 | 0.953094  |
| 71 | 1 | 0 | 7.967155   | -1.505496 | 1.976867  |
| 72 | 1 | 0 | 7.967929   | -1.984426 | 0.281405  |
| 73 | 6 | 0 | 9.254296   | -0.292121 | 0.706816  |
| 74 | 1 | 0 | 10.142680  | -0.912060 | 0.867129  |
| 75 | 1 | 0 | 9.302627   | 0.527949  | 1.436139  |
| 76 | 6 | 0 | 9.254296   | 0.292121  | -0.706816 |
| 77 | 1 | 0 | 10.142680  | 0.912060  | -0.867129 |
| 78 | 1 | 0 | 9.302627   | -0.527949 | -1.436139 |
| 79 | 6 | 0 | 7.990175   | 1.116289  | -0.953094 |
| 80 | 1 | 0 | 7.967929   | 1.984426  | -0.281405 |
| 81 | 1 | 0 | 7.967155   | 1.505496  | -1.976867 |
| 82 | 6 | 0 | 4.793192   | -0.888871 | 1.859349  |
| 83 | 1 | 0 | 4.975953   | -0.041026 | 2.536763  |
| 84 | 6 | 0 | 3.608651   | -1.710862 | 2.175269  |
| 85 | 6 | 0 | 3.277977   | -2.825184 | 1.392104  |
| 86 | 1 | 0 | 3.911482   | -3.067485 | 0.543629  |
| 87 | 6 | 0 | 2.175269   | -3.608651 | 1.710862  |
| 88 | 6 | 0 | 1.392104   | -3.277977 | 2.825184  |

|     |   |   |           |           |            |
|-----|---|---|-----------|-----------|------------|
| 89  | 1 | 0 | 0.543629  | -3.911482 | 3.067485   |
| 90  | 6 | 0 | 1.710862  | -2.175269 | 3.608651   |
| 91  | 6 | 0 | 2.825184  | -1.392104 | 3.277977   |
| 92  | 1 | 0 | 3.067485  | -0.543629 | 3.911482   |
| 93  | 6 | 0 | 0.888871  | -1.859349 | 4.793192   |
| 94  | 1 | 0 | 0.041026  | -2.536763 | 4.975953   |
| 95  | 6 | 0 | 0.289320  | -0.710781 | 6.722106   |
| 96  | 1 | 0 | -0.562336 | -1.414837 | 6.703079   |
| 97  | 6 | 0 | -0.289320 | 0.710781  | 6.722106   |
| 98  | 1 | 0 | 0.562336  | 1.414837  | 6.703079   |
| 99  | 6 | 0 | -1.116289 | 0.953094  | 7.990175   |
| 100 | 1 | 0 | -1.505496 | 1.976867  | 7.967155   |
| 101 | 1 | 0 | -1.984426 | 0.281405  | 7.967929   |
| 102 | 6 | 0 | -0.292121 | 0.706816  | 9.254296   |
| 103 | 1 | 0 | 0.527949  | 1.436139  | 9.302627   |
| 104 | 1 | 0 | -0.912060 | 0.867129  | 10.142680  |
| 105 | 6 | 0 | 0.292121  | -0.706816 | 9.254296   |
| 106 | 1 | 0 | -0.527949 | -1.436139 | 9.302627   |
| 107 | 1 | 0 | 0.912060  | -0.867129 | 10.142680  |
| 108 | 6 | 0 | 1.116289  | -0.953094 | 7.990175   |
| 109 | 1 | 0 | 1.984426  | -0.281405 | 7.967929   |
| 110 | 1 | 0 | 1.505496  | -1.976867 | 7.967155   |
| 111 | 6 | 0 | -0.888871 | 1.859349  | 4.793192   |
| 112 | 1 | 0 | -0.041026 | 2.536763  | 4.975953   |
| 113 | 7 | 0 | 1.143318  | 0.883652  | -5.561970  |
| 114 | 7 | 0 | -1.143318 | -0.883652 | -5.561970  |
| 115 | 7 | 0 | -0.883652 | -5.561970 | -1.143318  |
| 116 | 7 | 0 | 0.883652  | -5.561970 | 1.143318   |
| 117 | 6 | 0 | 2.825184  | 1.392104  | -3.277977  |
| 118 | 1 | 0 | 3.067485  | 0.543629  | -3.911482  |
| 119 | 6 | 0 | 1.710862  | 2.175269  | -3.608651  |
| 120 | 6 | 0 | 0.888871  | 1.859349  | -4.793192  |
| 121 | 1 | 0 | 0.041026  | 2.536763  | -4.975953  |
| 122 | 6 | 0 | 0.289320  | 0.710781  | -6.722106  |
| 123 | 1 | 0 | -0.562336 | 1.414837  | -6.703079  |
| 124 | 6 | 0 | -0.289320 | -0.710781 | -6.722106  |
| 125 | 1 | 0 | 0.562336  | -1.414837 | -6.703079  |
| 126 | 6 | 0 | -1.116289 | -0.953094 | -7.990175  |
| 127 | 1 | 0 | -1.505496 | -1.976867 | -7.967155  |
| 128 | 1 | 0 | -1.984426 | -0.281405 | -7.967929  |
| 129 | 6 | 0 | -0.292121 | -0.706816 | -9.254296  |
| 130 | 1 | 0 | -0.912060 | -0.867129 | -10.142680 |
| 131 | 1 | 0 | 0.527949  | -1.436139 | -9.302627  |
| 132 | 6 | 0 | 0.292121  | 0.706816  | -9.254296  |
| 133 | 1 | 0 | 0.912060  | 0.867129  | -10.142680 |
| 134 | 1 | 0 | -0.527949 | 1.436139  | -9.302627  |
| 135 | 6 | 0 | 1.116289  | 0.953094  | -7.990175  |
| 136 | 1 | 0 | 1.984426  | 0.281405  | -7.967929  |
| 137 | 1 | 0 | 1.505496  | 1.976867  | -7.967155  |
| 138 | 6 | 0 | -0.888871 | -1.859349 | -4.793192  |
| 139 | 1 | 0 | -0.041026 | -2.536763 | -4.975953  |
| 140 | 6 | 0 | -1.710862 | -2.175269 | -3.608651  |
| 141 | 6 | 0 | -2.825184 | -1.392104 | -3.277977  |
| 142 | 1 | 0 | -3.067485 | -0.543629 | -3.911482  |
| 143 | 6 | 0 | -3.608651 | -1.710862 | -2.175269  |
| 144 | 6 | 0 | -3.277977 | -2.825184 | -1.392104  |
| 145 | 1 | 0 | -3.911482 | -3.067485 | -0.543629  |
| 146 | 6 | 0 | -2.175269 | -3.608651 | -1.710862  |
| 147 | 6 | 0 | -1.392104 | -3.277977 | -2.825184  |

|     |    |   |           |            |           |
|-----|----|---|-----------|------------|-----------|
| 148 | 1  | 0 | -0.543629 | -3.911482  | -3.067485 |
| 149 | 6  | 0 | -1.859349 | -4.793192  | -0.888871 |
| 150 | 1  | 0 | -2.536763 | -4.975953  | -0.041026 |
| 151 | 6  | 0 | -0.710781 | -6.722106  | -0.289320 |
| 152 | 1  | 0 | -1.414837 | -6.703079  | 0.562336  |
| 153 | 6  | 0 | 0.710781  | -6.722106  | 0.289320  |
| 154 | 1  | 0 | 1.414837  | -6.703079  | -0.562336 |
| 155 | 6  | 0 | 0.953094  | -7.990175  | 1.116289  |
| 156 | 1  | 0 | 1.976867  | -7.967155  | 1.505496  |
| 157 | 1  | 0 | 0.281405  | -7.967929  | 1.984426  |
| 158 | 6  | 0 | 0.706816  | -9.254296  | 0.292121  |
| 159 | 1  | 0 | 1.436139  | -9.302627  | -0.527949 |
| 160 | 1  | 0 | 0.867129  | -10.142680 | 0.912060  |
| 161 | 6  | 0 | -0.706816 | -9.254296  | -0.292121 |
| 162 | 1  | 0 | -1.436139 | -9.302627  | 0.527949  |
| 163 | 1  | 0 | -0.867129 | -10.142680 | -0.912060 |
| 164 | 6  | 0 | -0.953094 | -7.990175  | -1.116289 |
| 165 | 1  | 0 | -0.281405 | -7.967929  | -1.984426 |
| 166 | 1  | 0 | -1.976867 | -7.967155  | -1.505496 |
| 167 | 6  | 0 | 1.859349  | -4.793192  | 0.888871  |
| 168 | 1  | 0 | 2.536763  | -4.975953  | 0.041026  |
| 169 | 16 | 0 | 2.327471  | 2.327471   | 2.327471  |
| 170 | 16 | 0 | 2.327471  | -2.327471  | -2.327471 |
| 171 | 16 | 0 | -2.327471 | 2.327471   | -2.327471 |
| 172 | 16 | 0 | -2.327471 | -2.327471  | 2.327471  |
| 173 | 9  | 0 | -1.289012 | -1.267785  | 2.861888  |
| 174 | 9  | 0 | -1.289012 | 1.267785   | -2.861888 |
| 175 | 9  | 0 | -1.267785 | 2.861888   | -1.289012 |
| 176 | 9  | 0 | 1.289012  | 1.267785   | 2.861888  |
| 177 | 9  | 0 | 1.267785  | 2.861888   | 1.289012  |
| 178 | 9  | 0 | 1.289012  | -1.267785  | -2.861888 |
| 179 | 9  | 0 | 1.267785  | -2.861888  | -1.289012 |
| 180 | 9  | 0 | -1.267785 | -2.861888  | 1.289012  |
| 181 | 9  | 0 | 1.809397  | -3.375300  | -3.399522 |
| 182 | 9  | 0 | -1.809397 | 3.375300   | -3.399522 |
| 183 | 9  | 0 | 1.809397  | 3.375300   | 3.399522  |
| 184 | 9  | 0 | -1.809397 | -3.375300  | 3.399522  |
| 185 | 9  | 0 | -2.861888 | 1.289012   | -1.267785 |
| 186 | 9  | 0 | 2.861888  | 1.289012   | 1.267785  |
| 187 | 9  | 0 | -2.861888 | -1.289012  | 1.267785  |
| 188 | 9  | 0 | 2.861888  | -1.289012  | -1.267785 |
| 189 | 9  | 0 | -3.399522 | -1.809397  | 3.375300  |
| 190 | 9  | 0 | 3.399522  | 1.809397   | 3.375300  |
| 191 | 9  | 0 | -3.399522 | 1.809397   | -3.375300 |
| 192 | 9  | 0 | 3.399522  | -1.809397  | -3.375300 |
| 193 | 9  | 0 | -3.375300 | 3.399522   | -1.809397 |
| 194 | 9  | 0 | 3.375300  | 3.399522   | 1.809397  |
| 195 | 9  | 0 | 3.375300  | -3.399522  | -1.809397 |
| 196 | 9  | 0 | -3.375300 | -3.399522  | 1.809397  |

5SF6@CC3 T cc3-rsf6bx

Standard orientation:

| Center<br>Number | Atomic<br>Number | Atomic<br>Type | Coordinates (Angstroms) |           |           |
|------------------|------------------|----------------|-------------------------|-----------|-----------|
|                  |                  |                | X                       | Y         | Z         |
| 1                | 7                | 0              | 1.145020                | 0.864217  | -5.552172 |
| 2                | 7                | 0              | -1.145020               | -0.864217 | -5.552172 |

|    |   |   |           |            |            |
|----|---|---|-----------|------------|------------|
| 3  | 7 | 0 | -0.864217 | -5.552172  | -1.145020  |
| 4  | 7 | 0 | 0.864217  | -5.552172  | 1.145020   |
| 5  | 6 | 0 | 2.787035  | 1.343657   | -3.225618  |
| 6  | 1 | 0 | 3.041246  | 0.495960   | -3.856388  |
| 7  | 6 | 0 | 1.672246  | 2.123186   | -3.565609  |
| 8  | 6 | 0 | 0.871444  | 1.821479   | -4.767181  |
| 9  | 1 | 0 | 0.024497  | 2.499350   | -4.952219  |
| 10 | 6 | 0 | 0.300434  | 0.706240   | -6.720923  |
| 11 | 1 | 0 | -0.540922 | 1.422805   | -6.707843  |
| 12 | 6 | 0 | -0.300434 | -0.706240  | -6.720923  |
| 13 | 1 | 0 | 0.540922  | -1.422805  | -6.707843  |
| 14 | 6 | 0 | -1.135743 | -0.931987  | -7.985635  |
| 15 | 1 | 0 | -1.544301 | -1.948190  | -7.963548  |
| 16 | 1 | 0 | -1.990607 | -0.243620  | -7.961357  |
| 17 | 6 | 0 | -0.307349 | -0.700549  | -9.250198  |
| 18 | 1 | 0 | -0.930760 | -0.846663  | -10.138594 |
| 19 | 1 | 0 | 0.496981  | -1.447109  | -9.299861  |
| 20 | 6 | 0 | 0.307349  | 0.700549   | -9.250198  |
| 21 | 1 | 0 | 0.930760  | 0.846663   | -10.138594 |
| 22 | 1 | 0 | -0.496981 | 1.447109   | -9.299861  |
| 23 | 6 | 0 | 1.135743  | 0.931987   | -7.985635  |
| 24 | 1 | 0 | 1.990607  | 0.243620   | -7.961357  |
| 25 | 1 | 0 | 1.544301  | 1.948190   | -7.963548  |
| 26 | 6 | 0 | -0.871444 | -1.821479  | -4.767181  |
| 27 | 1 | 0 | -0.024497 | -2.499350  | -4.952219  |
| 28 | 6 | 0 | -1.672246 | -2.123186  | -3.565609  |
| 29 | 6 | 0 | -2.787035 | -1.343657  | -3.225618  |
| 30 | 1 | 0 | -3.041246 | -0.495960  | -3.856388  |
| 31 | 6 | 0 | -3.565609 | -1.672246  | -2.123186  |
| 32 | 6 | 0 | -3.225618 | -2.787035  | -1.343657  |
| 33 | 1 | 0 | -3.856388 | -3.041246  | -0.495960  |
| 34 | 6 | 0 | -2.123186 | -3.565609  | -1.672246  |
| 35 | 6 | 0 | -1.343657 | -3.225618  | -2.787035  |
| 36 | 1 | 0 | -0.495960 | -3.856388  | -3.041246  |
| 37 | 6 | 0 | -1.821479 | -4.767181  | -0.871444  |
| 38 | 1 | 0 | -2.499350 | -4.952219  | -0.024497  |
| 39 | 6 | 0 | -0.706240 | -6.720923  | -0.300434  |
| 40 | 1 | 0 | -1.422805 | -6.707843  | 0.540922   |
| 41 | 6 | 0 | 0.706240  | -6.720923  | 0.300434   |
| 42 | 1 | 0 | 1.422805  | -6.707843  | -0.540922  |
| 43 | 6 | 0 | 0.931987  | -7.985635  | 1.135743   |
| 44 | 1 | 0 | 1.948190  | -7.963548  | 1.544301   |
| 45 | 1 | 0 | 0.243620  | -7.961357  | 1.990607   |
| 46 | 6 | 0 | 0.700549  | -9.250198  | 0.307349   |
| 47 | 1 | 0 | 1.447109  | -9.299861  | -0.496981  |
| 48 | 1 | 0 | 0.846663  | -10.138594 | 0.930760   |
| 49 | 6 | 0 | -0.700549 | -9.250198  | -0.307349  |
| 50 | 1 | 0 | -1.447109 | -9.299861  | 0.496981   |
| 51 | 1 | 0 | -0.846663 | -10.138594 | -0.930760  |
| 52 | 6 | 0 | -0.931987 | -7.985635  | -1.135743  |
| 53 | 1 | 0 | -0.243620 | -7.961357  | -1.990607  |
| 54 | 1 | 0 | -1.948190 | -7.963548  | -1.544301  |
| 55 | 6 | 0 | 1.821479  | -4.767181  | 0.871444   |
| 56 | 1 | 0 | 2.499350  | -4.952219  | 0.024497   |
| 57 | 7 | 0 | 0.864217  | 5.552172   | -1.145020  |
| 58 | 7 | 0 | -0.864217 | 5.552172   | 1.145020   |
| 59 | 7 | 0 | -5.552172 | 1.145020   | 0.864217   |
| 60 | 7 | 0 | -5.552172 | -1.145020  | -0.864217  |
| 61 | 6 | 0 | 1.343657  | 3.225618   | -2.787035  |

|     |   |   |            |           |           |
|-----|---|---|------------|-----------|-----------|
| 62  | 1 | 0 | 0.495960   | 3.856388  | -3.041246 |
| 63  | 6 | 0 | 2.123186   | 3.565609  | -1.672246 |
| 64  | 6 | 0 | 1.821479   | 4.767181  | -0.871444 |
| 65  | 1 | 0 | 2.499350   | 4.952219  | -0.024497 |
| 66  | 6 | 0 | 0.706240   | 6.720923  | -0.300434 |
| 67  | 1 | 0 | 1.422805   | 6.707843  | 0.540922  |
| 68  | 6 | 0 | -0.706240  | 6.720923  | 0.300434  |
| 69  | 1 | 0 | -1.422805  | 6.707843  | -0.540922 |
| 70  | 6 | 0 | -0.931987  | 7.985635  | 1.135743  |
| 71  | 1 | 0 | -1.948190  | 7.963548  | 1.544301  |
| 72  | 1 | 0 | -0.243620  | 7.961357  | 1.990607  |
| 73  | 6 | 0 | -0.700549  | 9.250198  | 0.307349  |
| 74  | 1 | 0 | -0.846663  | 10.138594 | 0.930760  |
| 75  | 1 | 0 | -1.447109  | 9.299861  | -0.496981 |
| 76  | 6 | 0 | 0.700549   | 9.250198  | -0.307349 |
| 77  | 1 | 0 | 0.846663   | 10.138594 | -0.930760 |
| 78  | 1 | 0 | 1.447109   | 9.299861  | 0.496981  |
| 79  | 6 | 0 | 0.931987   | 7.985635  | -1.135743 |
| 80  | 1 | 0 | 0.243620   | 7.961357  | -1.990607 |
| 81  | 1 | 0 | 1.948190   | 7.963548  | -1.544301 |
| 82  | 6 | 0 | -1.821479  | 4.767181  | 0.871444  |
| 83  | 1 | 0 | -2.499350  | 4.952219  | 0.024497  |
| 84  | 6 | 0 | -2.123186  | 3.565609  | 1.672246  |
| 85  | 6 | 0 | -1.343657  | 3.225618  | 2.787035  |
| 86  | 1 | 0 | -0.495960  | 3.856388  | 3.041246  |
| 87  | 6 | 0 | -1.672246  | 2.123186  | 3.565609  |
| 88  | 6 | 0 | -2.787035  | 1.343657  | 3.225618  |
| 89  | 1 | 0 | -3.041246  | 0.495960  | 3.856388  |
| 90  | 6 | 0 | -3.565609  | 1.672246  | 2.123186  |
| 91  | 6 | 0 | -3.225618  | 2.787035  | 1.343657  |
| 92  | 1 | 0 | -3.856388  | 3.041246  | 0.495960  |
| 93  | 6 | 0 | -4.767181  | 0.871444  | 1.821479  |
| 94  | 1 | 0 | -4.952219  | 0.024497  | 2.499350  |
| 95  | 6 | 0 | -6.720923  | 0.300434  | 0.706240  |
| 96  | 1 | 0 | -6.707843  | -0.540922 | 1.422805  |
| 97  | 6 | 0 | -6.720923  | -0.300434 | -0.706240 |
| 98  | 1 | 0 | -6.707843  | 0.540922  | -1.422805 |
| 99  | 6 | 0 | -7.985635  | -1.135743 | -0.931987 |
| 100 | 1 | 0 | -7.963548  | -1.544301 | -1.948190 |
| 101 | 1 | 0 | -7.961357  | -1.990607 | -0.243620 |
| 102 | 6 | 0 | -9.250198  | -0.307349 | -0.700549 |
| 103 | 1 | 0 | -9.299861  | 0.496981  | -1.447109 |
| 104 | 1 | 0 | -10.138594 | -0.930760 | -0.846663 |
| 105 | 6 | 0 | -9.250198  | 0.307349  | 0.700549  |
| 106 | 1 | 0 | -9.299861  | -0.496981 | 1.447109  |
| 107 | 1 | 0 | -10.138594 | 0.930760  | 0.846663  |
| 108 | 6 | 0 | -7.985635  | 1.135743  | 0.931987  |
| 109 | 1 | 0 | -7.961357  | 1.990607  | 0.243620  |
| 110 | 1 | 0 | -7.963548  | 1.544301  | 1.948190  |
| 111 | 6 | 0 | -4.767181  | -0.871444 | -1.821479 |
| 112 | 1 | 0 | -4.952219  | -0.024497 | -2.499350 |
| 113 | 7 | 0 | 5.552172   | 1.145020  | -0.864217 |
| 114 | 7 | 0 | 5.552172   | -1.145020 | 0.864217  |
| 115 | 7 | 0 | 1.145020   | -0.864217 | 5.552172  |
| 116 | 7 | 0 | -1.145020  | 0.864217  | 5.552172  |
| 117 | 6 | 0 | 3.225618   | 2.787035  | -1.343657 |
| 118 | 1 | 0 | 3.856388   | 3.041246  | -0.495960 |
| 119 | 6 | 0 | 3.565609   | 1.672246  | -2.123186 |
| 120 | 6 | 0 | 4.767181   | 0.871444  | -1.821479 |

|     |    |   |           |           |           |
|-----|----|---|-----------|-----------|-----------|
| 121 | 1  | 0 | 4.952219  | 0.024497  | -2.499350 |
| 122 | 6  | 0 | 6.720923  | 0.300434  | -0.706240 |
| 123 | 1  | 0 | 6.707843  | -0.540922 | -1.422805 |
| 124 | 6  | 0 | 6.720923  | -0.300434 | 0.706240  |
| 125 | 1  | 0 | 6.707843  | 0.540922  | 1.422805  |
| 126 | 6  | 0 | 7.985635  | -1.135743 | 0.931987  |
| 127 | 1  | 0 | 7.963548  | -1.544301 | 1.948190  |
| 128 | 1  | 0 | 7.961357  | -1.990607 | 0.243620  |
| 129 | 6  | 0 | 9.250198  | -0.307349 | 0.700549  |
| 130 | 1  | 0 | 10.138594 | -0.930760 | 0.846663  |
| 131 | 1  | 0 | 9.299861  | 0.496981  | 1.447109  |
| 132 | 6  | 0 | 9.250198  | 0.307349  | -0.700549 |
| 133 | 1  | 0 | 10.138594 | 0.930760  | -0.846663 |
| 134 | 1  | 0 | 9.299861  | -0.496981 | -1.447109 |
| 135 | 6  | 0 | 7.985635  | 1.135743  | -0.931987 |
| 136 | 1  | 0 | 7.961357  | 1.990607  | -0.243620 |
| 137 | 1  | 0 | 7.963548  | 1.544301  | -1.948190 |
| 138 | 6  | 0 | 4.767181  | -0.871444 | 1.821479  |
| 139 | 1  | 0 | 4.952219  | -0.024497 | 2.499350  |
| 140 | 6  | 0 | 3.565609  | -1.672246 | 2.123186  |
| 141 | 6  | 0 | 3.225618  | -2.787035 | 1.343657  |
| 142 | 1  | 0 | 3.856388  | -3.041246 | 0.495960  |
| 143 | 6  | 0 | 2.123186  | -3.565609 | 1.672246  |
| 144 | 6  | 0 | 1.343657  | -3.225618 | 2.787035  |
| 145 | 1  | 0 | 0.495960  | -3.856388 | 3.041246  |
| 146 | 6  | 0 | 1.672246  | -2.123186 | 3.565609  |
| 147 | 6  | 0 | 2.787035  | -1.343657 | 3.225618  |
| 148 | 1  | 0 | 3.041246  | -0.495960 | 3.856388  |
| 149 | 6  | 0 | 0.871444  | -1.821479 | 4.767181  |
| 150 | 1  | 0 | 0.024497  | -2.499350 | 4.952219  |
| 151 | 6  | 0 | 0.300434  | -0.706240 | 6.720923  |
| 152 | 1  | 0 | -0.540922 | -1.422805 | 6.707843  |
| 153 | 6  | 0 | -0.300434 | 0.706240  | 6.720923  |
| 154 | 1  | 0 | 0.540922  | 1.422805  | 6.707843  |
| 155 | 6  | 0 | -1.135743 | 0.931987  | 7.985635  |
| 156 | 1  | 0 | -1.544301 | 1.948190  | 7.963548  |
| 157 | 1  | 0 | -1.990607 | 0.243620  | 7.961357  |
| 158 | 6  | 0 | -0.307349 | 0.700549  | 9.250198  |
| 159 | 1  | 0 | 0.496981  | 1.447109  | 9.299861  |
| 160 | 1  | 0 | -0.930760 | 0.846663  | 10.138594 |
| 161 | 6  | 0 | 0.307349  | -0.700549 | 9.250198  |
| 162 | 1  | 0 | -0.496981 | -1.447109 | 9.299861  |
| 163 | 1  | 0 | 0.930760  | -0.846663 | 10.138594 |
| 164 | 6  | 0 | 1.135743  | -0.931987 | 7.985635  |
| 165 | 1  | 0 | 1.990607  | -0.243620 | 7.961357  |
| 166 | 1  | 0 | 1.544301  | -1.948190 | 7.963548  |
| 167 | 6  | 0 | -0.871444 | 1.821479  | 4.767181  |
| 168 | 1  | 0 | -0.024497 | 2.499350  | 4.952219  |
| 169 | 16 | 0 | -2.602447 | 2.602447  | -2.602447 |
| 170 | 16 | 0 | 2.602447  | 2.602447  | 2.602447  |
| 171 | 16 | 0 | 2.602447  | -2.602447 | -2.602447 |
| 172 | 16 | 0 | -2.602447 | -2.602447 | 2.602447  |
| 173 | 9  | 0 | -3.134767 | -1.565538 | 1.539310  |
| 174 | 9  | 0 | 3.134767  | -1.565538 | -1.539310 |
| 175 | 9  | 0 | 1.565538  | -1.539310 | -3.134767 |
| 176 | 9  | 0 | -3.134767 | 1.565538  | -1.539310 |
| 177 | 9  | 0 | -1.565538 | 1.539310  | -3.134767 |
| 178 | 9  | 0 | 3.134767  | 1.565538  | 1.539310  |
| 179 | 9  | 0 | 1.565538  | 1.539310  | 3.134767  |



|     |    |   |           |           |           |
|-----|----|---|-----------|-----------|-----------|
| 180 | 9  | 0 | -1.565538 | -1.539310 | 3.134767  |
| 181 | 9  | 0 | 3.675290  | 2.078296  | 3.645525  |
| 182 | 9  | 0 | 3.675290  | -2.078296 | -3.645525 |
| 183 | 9  | 0 | -3.675290 | 2.078296  | -3.645525 |
| 184 | 9  | 0 | -3.675290 | -2.078296 | 3.645525  |
| 185 | 9  | 0 | 1.539310  | -3.134767 | -1.565538 |
| 186 | 9  | 0 | -1.539310 | 3.134767  | -1.565538 |
| 187 | 9  | 0 | -1.539310 | -3.134767 | 1.565538  |
| 188 | 9  | 0 | 1.539310  | 3.134767  | 1.565538  |
| 189 | 9  | 0 | -3.645525 | -3.675290 | 2.078296  |
| 190 | 9  | 0 | -3.645525 | 3.675290  | -2.078296 |
| 191 | 9  | 0 | 3.645525  | -3.675290 | -2.078296 |
| 192 | 9  | 0 | 3.645525  | 3.675290  | 2.078296  |
| 193 | 9  | 0 | 2.078296  | -3.645525 | -3.675290 |
| 194 | 9  | 0 | -2.078296 | 3.645525  | -3.675290 |
| 195 | 9  | 0 | 2.078296  | 3.645525  | 3.675290  |
| 196 | 9  | 0 | -2.078296 | -3.645525 | 3.675290  |
| 197 | 16 | 0 | 0.000000  | 0.000000  | 0.000000  |
| 198 | 9  | 0 | 0.000000  | 1.580937  | -0.000000 |
| 199 | 9  | 0 | 0.000000  | -1.580937 | -0.000000 |
| 200 | 9  | 0 | 0.000000  | -0.000000 | -1.580937 |
| 201 | 9  | 0 | 0.000000  | 0.000000  | 1.580937  |
| 202 | 9  | 0 | -1.580937 | -0.000000 | 0.000000  |
| 203 | 9  | 0 | 1.580937  | 0.000000  | 0.000000  |

5SF6@CC3 C3 cc3-rsf6bxx

Standard orientation:

| Center<br>Number | Atomic<br>Number | Atomic<br>Type | Coordinates (Angstroms) |           |           |
|------------------|------------------|----------------|-------------------------|-----------|-----------|
|                  |                  |                | X                       | Y         | Z         |
| 1                | 16               | 0              | 0.000000                | 0.000000  | -0.165008 |
| 2                | 9                | 0              | 1.266202                | 0.249335  | -1.079099 |
| 3                | 9                | 0              | 0.845023                | -0.976547 | 0.746516  |
| 4                | 9                | 0              | -0.417171               | -1.221231 | -1.079099 |
| 5                | 9                | 0              | -1.268226               | -0.243538 | 0.746516  |
| 6                | 9                | 0              | -0.849032               | 0.971896  | -1.079099 |
| 7                | 9                | 0              | 0.423203                | 1.220085  | 0.746516  |
| 8                | 7                | 0              | 3.222833                | 1.852044  | -4.361519 |
| 9                | 7                | 0              | 4.814558                | 2.259055  | -1.999729 |
| 10               | 7                | 0              | -3.215333               | 1.865033  | -4.361519 |
| 11               | 7                | 0              | -0.007499               | -3.717077 | -4.361519 |
| 12               | 6                | 0              | -1.351981               | -0.333161 | -4.329444 |
| 13               | 1                | 0              | -2.412981               | -0.567703 | -4.344816 |
| 14               | 6                | 0              | 0.387465                | 1.337430  | -4.329444 |
| 15               | 1                | 0              | 0.714845                | 2.373554  | -4.344816 |
| 16               | 6                | 0              | -1.968186               | 2.092339  | -4.361053 |
| 17               | 1                | 0              | -1.563453               | 3.115283  | -4.393154 |
| 18               | 7                | 0              | 1.620848                | 4.586320  | 3.096150  |
| 19               | 6                | 0              | 2.796112                | 0.658330  | -4.361053 |
| 20               | 1                | 0              | 3.479641                | -0.203652 | -4.393154 |
| 21               | 7                | 0              | -4.363678               | 3.040002  | -1.999729 |
| 22               | 7                | 0              | -4.782294               | -0.889465 | 3.096150  |
| 23               | 7                | 0              | 3.161446                | -3.696856 | 3.096150  |
| 24               | 7                | 0              | -0.450880               | -5.299057 | -1.999729 |
| 25               | 6                | 0              | -0.963142               | 1.013570  | -4.330582 |
| 26               | 6                | 0              | 0.964516                | -1.004270 | -4.329444 |
| 27               | 1                | 0              | 1.698136                | -1.805851 | -4.344816 |

|    |   |   |           |           |           |
|----|---|---|-----------|-----------|-----------|
| 28 | 7 | 0 | 4.484987  | -1.174451 | 3.427832  |
| 29 | 6 | 0 | 5.150003  | -2.432789 | 3.708524  |
| 30 | 1 | 0 | 5.637319  | -2.839172 | 2.803623  |
| 31 | 6 | 0 | -0.559657 | -5.056825 | -4.422377 |
| 32 | 1 | 0 | -1.660689 | -5.042473 | -4.326901 |
| 33 | 7 | 0 | -1.225389 | 4.471338  | 3.427832  |
| 34 | 7 | 0 | -3.259598 | -3.296887 | 3.427832  |
| 35 | 6 | 0 | -0.827925 | -2.750669 | -4.361053 |
| 36 | 1 | 0 | -1.916188 | -2.911631 | -4.393154 |
| 37 | 6 | 0 | 2.790036  | 2.606061  | 2.367681  |
| 38 | 6 | 0 | 3.296383  | 1.370942  | 2.752961  |
| 39 | 1 | 0 | 3.146522  | 0.994145  | 3.761060  |
| 40 | 6 | 0 | 4.659168  | 2.043736  | -4.422377 |
| 41 | 1 | 0 | 5.197254  | 1.083038  | -4.326901 |
| 42 | 6 | 0 | 0.861897  | -3.719272 | 2.367681  |
| 43 | 6 | 0 | -0.396206 | -1.340890 | -4.330582 |
| 44 | 6 | 0 | 1.359348  | 0.327320  | -4.330582 |
| 45 | 6 | 0 | -2.835463 | 2.169280  | 2.752961  |
| 46 | 1 | 0 | -2.434215 | 2.227895  | 3.761060  |
| 47 | 6 | 0 | 3.022027  | 3.073761  | 1.066516  |
| 48 | 1 | 0 | 2.632831  | 4.049475  | 0.789255  |
| 49 | 6 | 0 | 1.150941  | -4.154033 | 1.066516  |
| 50 | 1 | 0 | 2.190533  | -4.304836 | 0.789255  |
| 51 | 6 | 0 | 3.765216  | 2.316375  | 0.168451  |
| 52 | 6 | 0 | -0.468145 | 5.676428  | 3.708524  |
| 53 | 1 | 0 | -0.359865 | 6.301647  | 2.803623  |
| 54 | 6 | 0 | -0.176501 | -5.701591 | -5.759162 |
| 55 | 1 | 0 | -0.594581 | -5.100557 | -6.574117 |
| 56 | 1 | 0 | 0.915952  | -5.660501 | -5.860112 |
| 57 | 6 | 0 | -4.099511 | 3.013090  | -4.422377 |
| 58 | 1 | 0 | -3.536565 | 3.959435  | -4.326901 |
| 59 | 6 | 0 | 4.044460  | 0.598371  | 1.854311  |
| 60 | 6 | 0 | 0.943912  | 5.288607  | 4.170131  |
| 61 | 1 | 0 | 0.834220  | 4.645878  | 5.062540  |
| 62 | 6 | 0 | 4.275177  | 1.073891  | 0.569683  |
| 63 | 1 | 0 | 4.875313  | 0.505477  | -0.135839 |
| 64 | 6 | 0 | 4.065923  | 2.859454  | -1.170581 |
| 65 | 1 | 0 | 3.624271  | 3.841476  | -1.394300 |
| 66 | 6 | 0 | -1.504026 | -3.801790 | 1.854311  |
| 67 | 6 | 0 | -1.207572 | -4.239358 | 0.569683  |
| 68 | 1 | 0 | -1.999900 | -4.474884 | -0.135839 |
| 69 | 6 | 0 | -0.004287 | -5.879229 | -3.251983 |
| 70 | 1 | 0 | 1.097865  | -5.861683 | -3.332180 |
| 71 | 6 | 0 | 0.123431  | -4.418960 | 0.168451  |
| 72 | 6 | 0 | -4.849472 | 3.003650  | -5.759162 |
| 73 | 1 | 0 | -5.360114 | 2.037013  | -5.860112 |
| 74 | 1 | 0 | -4.119921 | 3.065201  | -6.574117 |
| 75 | 6 | 0 | 4.634325  | -0.689856 | 2.265839  |
| 76 | 1 | 0 | 5.231648  | -1.202318 | 1.496321  |
| 77 | 6 | 0 | 6.594154  | 3.237380  | -3.335202 |
| 78 | 1 | 0 | 6.872460  | 3.882656  | -2.494877 |
| 79 | 1 | 0 | 7.141863  | 2.294424  | -3.208427 |
| 80 | 6 | 0 | 5.093705  | 2.935902  | -3.251983 |
| 81 | 1 | 0 | 4.527434  | 3.881621  | -3.332180 |
| 82 | 6 | 0 | -0.460921 | -3.540223 | 2.752961  |
| 83 | 1 | 0 | -0.712306 | -3.222040 | 3.761060  |
| 84 | 6 | 0 | -4.509322 | 2.091466  | -1.170581 |
| 85 | 1 | 0 | -5.138951 | 1.217972  | -1.394300 |
| 86 | 6 | 0 | -5.089418 | 2.943327  | -3.251983 |

|     |   |   |           |           |           |
|-----|---|---|-----------|-----------|-----------|
| 87  | 1 | 0 | -5.625299 | 1.980062  | -3.332180 |
| 88  | 6 | 0 | -3.651933 | 1.113212  | 2.367681  |
| 89  | 6 | 0 | -0.493423 | -7.329395 | -3.335202 |
| 90  | 1 | 0 | -1.583902 | -7.332247 | -3.208427 |
| 91  | 1 | 0 | -0.073752 | -7.893053 | -2.494877 |
| 92  | 6 | 0 | -4.681859 | -3.243639 | 3.708524  |
| 93  | 1 | 0 | -5.277454 | -3.462476 | 2.803623  |
| 94  | 6 | 0 | -0.659248 | -7.150347 | -5.841273 |
| 95  | 1 | 0 | -1.757339 | -7.170043 | -5.817157 |
| 96  | 1 | 0 | -0.354964 | -7.592899 | -6.795643 |
| 97  | 6 | 0 | 5.025973  | 2.697941  | -5.759162 |
| 98  | 1 | 0 | 4.714502  | 2.035356  | -6.574117 |
| 99  | 1 | 0 | 4.444162  | 3.623488  | -5.860112 |
| 100 | 6 | 0 | -3.067606 | 3.165466  | 0.569683  |
| 101 | 1 | 0 | -2.875413 | 3.969406  | -0.135839 |
| 102 | 6 | 0 | -2.914595 | -3.668515 | 2.265839  |
| 103 | 1 | 0 | -3.657062 | -3.929581 | 1.496321  |
| 104 | 6 | 0 | -3.989735 | 0.066421  | 3.351170  |
| 105 | 1 | 0 | -3.516497 | 0.178631  | 4.338443  |
| 106 | 6 | 0 | -2.540434 | 3.203420  | 1.854311  |
| 107 | 6 | 0 | -3.888648 | 2.102586  | 0.168451  |
| 108 | 6 | 0 | 0.443398  | -4.950920 | -1.170581 |
| 109 | 1 | 0 | 1.514681  | -5.059449 | -1.394300 |
| 110 | 6 | 0 | 4.108112  | -3.461755 | 4.170131  |
| 111 | 1 | 0 | 3.606338  | -3.045394 | 5.062540  |
| 112 | 6 | 0 | 6.522006  | 3.004248  | -5.841273 |
| 113 | 1 | 0 | 7.088109  | 2.063121  | -5.817157 |
| 114 | 1 | 0 | 6.753125  | 3.489042  | -6.795643 |
| 115 | 6 | 0 | 6.207440  | -2.218531 | 4.796668  |
| 116 | 1 | 0 | 6.940393  | -1.487010 | 4.439283  |
| 117 | 1 | 0 | 5.715766  | -1.776193 | 5.672923  |
| 118 | 6 | 0 | 2.052389  | 3.422001  | 3.351170  |
| 119 | 1 | 0 | 1.912947  | 2.956060  | 4.338443  |
| 120 | 6 | 0 | 1.744791  | 6.539814  | 4.545739  |
| 121 | 1 | 0 | 1.880933  | 7.146445  | 3.640916  |
| 122 | 1 | 0 | 2.743063  | 6.234989  | 4.878215  |
| 123 | 6 | 0 | 1.937345  | -3.488422 | 3.351170  |
| 124 | 1 | 0 | 1.603549  | -3.134691 | 4.338443  |
| 125 | 6 | 0 | -4.172969 | 1.080272  | 1.066516  |
| 126 | 1 | 0 | -4.823363 | 0.255361  | 0.789255  |
| 127 | 6 | 0 | 4.791250  | -4.780940 | 4.545739  |
| 128 | 1 | 0 | 4.028127  | -5.493057 | 4.878215  |
| 129 | 1 | 0 | 5.248536  | -5.202158 | 3.640916  |
| 130 | 6 | 0 | 6.886625  | -3.534032 | 5.180120  |
| 131 | 1 | 0 | 7.621932  | -3.359238 | 5.972611  |
| 132 | 1 | 0 | 7.439042  | -3.923699 | 4.314194  |
| 133 | 6 | 0 | -1.719730 | 4.358371  | 2.265839  |
| 134 | 1 | 0 | -1.574586 | 5.131899  | 1.496321  |
| 135 | 6 | 0 | -6.536041 | -1.758874 | 4.545739  |
| 136 | 1 | 0 | -6.771191 | -0.741932 | 4.878215  |
| 137 | 1 | 0 | -7.129469 | -1.944287 | 3.640916  |
| 138 | 6 | 0 | -0.382751 | 7.731008  | 5.180120  |
| 139 | 1 | 0 | -0.901781 | 8.280406  | 5.972611  |
| 140 | 1 | 0 | -0.321498 | 8.404248  | 4.314194  |
| 141 | 6 | 0 | -0.116426 | -7.971761 | -4.670437 |
| 142 | 1 | 0 | 0.977580  | -8.032867 | -4.749123 |
| 143 | 1 | 0 | -0.495217 | -8.998400 | -4.712686 |
| 144 | 6 | 0 | -6.100731 | 4.092015  | -3.335202 |
| 145 | 1 | 0 | -6.798709 | 4.010397  | -2.494877 |

|     |    |   |           |           |           |
|-----|----|---|-----------|-----------|-----------|
| 146 | 1  | 0 | -5.557961 | 5.037823  | -3.208427 |
| 147 | 6  | 0 | -1.182415 | 6.485066  | 4.796668  |
| 148 | 1  | 0 | -2.182408 | 6.754061  | 4.439283  |
| 149 | 1  | 0 | -1.319655 | 5.838095  | 5.672923  |
| 150 | 6  | 0 | 6.961961  | 3.885052  | -4.670437 |
| 151 | 1  | 0 | 6.467877  | 4.863043  | -4.749123 |
| 152 | 1  | 0 | 8.040451  | 4.070330  | -4.712686 |
| 153 | 6  | 0 | -6.885751 | -2.784156 | 5.625425  |
| 154 | 1  | 0 | -7.953867 | -2.730896 | 5.861074  |
| 155 | 1  | 0 | -6.343899 | -2.538260 | 6.548902  |
| 156 | 6  | 0 | -5.052024 | -1.826851 | 4.170131  |
| 157 | 1  | 0 | -4.440558 | -1.600483 | 5.062540  |
| 158 | 6  | 0 | -5.862758 | 4.146099  | -5.841273 |
| 159 | 1  | 0 | -5.330770 | 5.106922  | -5.817157 |
| 160 | 1  | 0 | -6.398161 | 4.103857  | -6.795643 |
| 161 | 6  | 0 | 1.031726  | 7.355314  | 5.625425  |
| 162 | 1  | 0 | 0.973752  | 6.763108  | 6.548902  |
| 163 | 1  | 0 | 1.611908  | 8.253699  | 5.861074  |
| 164 | 6  | 0 | -6.845534 | 4.086709  | -4.670437 |
| 165 | 1  | 0 | -7.445457 | 3.169824  | -4.749123 |
| 166 | 1  | 0 | -7.545235 | 4.928070  | -4.712686 |
| 167 | 6  | 0 | -6.503874 | -4.196976 | 5.180120  |
| 168 | 1  | 0 | -6.720151 | -4.921168 | 5.972611  |
| 169 | 1  | 0 | -7.117544 | -4.480550 | 4.314194  |
| 170 | 6  | 0 | 5.854026  | -4.571158 | 5.625425  |
| 171 | 1  | 0 | 6.341959  | -5.522803 | 5.861074  |
| 172 | 1  | 0 | 5.370147  | -4.224848 | 6.548902  |
| 173 | 6  | 0 | -5.025024 | -4.266535 | 4.796668  |
| 174 | 1  | 0 | -4.396111 | -4.061902 | 5.672923  |
| 175 | 1  | 0 | -4.757984 | -5.267052 | 4.439283  |
| 176 | 16 | 0 | 0.151886  | 4.200641  | -1.510442 |
| 177 | 9  | 0 | -1.149121 | 3.389601  | -1.880028 |
| 178 | 9  | 0 | 1.451928  | 5.036714  | -1.154180 |
| 179 | 9  | 0 | 1.042883  | 2.922898  | -1.767241 |
| 180 | 9  | 0 | 0.311289  | 4.622217  | -3.030107 |
| 181 | 9  | 0 | 0.000000  | 3.786531  | 0.004540  |
| 182 | 9  | 0 | -0.733882 | 5.487510  | -1.245086 |
| 183 | 16 | 0 | -3.713805 | -1.968783 | -1.510442 |
| 184 | 9  | 0 | -2.360920 | -2.689968 | -1.880028 |
| 185 | 9  | 0 | -3.052746 | -0.558286 | -1.767241 |
| 186 | 9  | 0 | -4.158602 | -2.041525 | -3.030107 |
| 187 | 9  | 0 | -3.279232 | -1.893266 | 0.004540  |
| 188 | 9  | 0 | -4.385382 | -3.379315 | -1.245086 |
| 189 | 9  | 0 | -5.087886 | -1.260951 | -1.154180 |
| 190 | 16 | 0 | 0.000000  | 0.000000  | 4.339274  |
| 191 | 9  | 0 | 1.101249  | -0.676647 | 3.434888  |
| 192 | 9  | 0 | -0.032681 | -1.290409 | 5.260731  |
| 193 | 9  | 0 | 1.133868  | 0.616902  | 5.260731  |
| 194 | 9  | 0 | 0.035369  | 1.292034  | 3.434888  |
| 195 | 9  | 0 | -1.136618 | -0.615386 | 3.434888  |
| 196 | 9  | 0 | -1.101187 | 0.673507  | 5.260731  |
| 197 | 16 | 0 | 3.561919  | -2.231858 | -1.510442 |
| 198 | 9  | 0 | 2.009863  | -2.364613 | -1.767241 |
| 199 | 9  | 0 | 3.635958  | -3.775763 | -1.154180 |
| 200 | 9  | 0 | 3.279232  | -1.893266 | 0.004540  |
| 201 | 9  | 0 | 3.510041  | -0.699632 | -1.880028 |
| 202 | 9  | 0 | 3.847313  | -2.580692 | -3.030107 |
| 203 | 9  | 0 | 5.119264  | -2.108194 | -1.245086 |

---

(SF6)4 T cc3-sf6bby

Standard orientation:

| Center<br>Number | Atomic<br>Number | Atomic<br>Type | Coordinates (Angstroms) |           |           |
|------------------|------------------|----------------|-------------------------|-----------|-----------|
|                  |                  |                | X                       | Y         | Z         |
| 1                | 16               | 0              | -2.006679               | 2.006679  | 2.006679  |
| 2                | 16               | 0              | 2.006679                | -2.006679 | 2.006679  |
| 3                | 16               | 0              | 2.006679                | 2.006679  | -2.006679 |
| 4                | 16               | 0              | -2.006679               | -2.006679 | -2.006679 |
| 5                | 9                | 0              | -2.532868               | -0.946249 | -0.960216 |
| 6                | 9                | 0              | 2.532868                | 0.946249  | -0.960216 |
| 7                | 9                | 0              | 0.960216                | 2.532868  | -0.946249 |
| 8                | 9                | 0              | -2.532868               | 0.946249  | 0.960216  |
| 9                | 9                | 0              | -0.960216               | 2.532868  | 0.946249  |
| 10               | 9                | 0              | 2.532868                | -0.946249 | 0.960216  |
| 11               | 9                | 0              | 0.960216                | -2.532868 | 0.946249  |
| 12               | 9                | 0              | -0.960216               | -2.532868 | -0.946249 |
| 13               | 9                | 0              | 3.066762                | -3.052714 | 1.480149  |
| 14               | 9                | 0              | 3.066762                | 3.052714  | -1.480149 |
| 15               | 9                | 0              | -3.066762               | 3.052714  | 1.480149  |
| 16               | 9                | 0              | -3.066762               | -3.052714 | -1.480149 |
| 17               | 9                | 0              | 0.946249                | 0.960216  | -2.532868 |
| 18               | 9                | 0              | -0.946249               | 0.960216  | 2.532868  |
| 19               | 9                | 0              | -0.946249               | -0.960216 | -2.532868 |
| 20               | 9                | 0              | 0.946249                | -0.960216 | 2.532868  |
| 21               | 9                | 0              | -3.052714               | -1.480149 | -3.066762 |
| 22               | 9                | 0              | -3.052714               | 1.480149  | 3.066762  |
| 23               | 9                | 0              | 3.052714                | 1.480149  | -3.066762 |
| 24               | 9                | 0              | 3.052714                | -1.480149 | 3.066762  |
| 25               | 9                | 0              | 1.480149                | 3.066762  | -3.052714 |
| 26               | 9                | 0              | -1.480149               | 3.066762  | 3.052714  |
| 27               | 9                | 0              | 1.480149                | -3.066762 | 3.052714  |
| 28               | 9                | 0              | -1.480149               | -3.066762 | -3.052714 |

(SF6)5 D2 cc3-sf6bb

Standard orientation:

| Center<br>Number | Atomic<br>Number | Atomic<br>Type | Coordinates (Angstroms) |           |           |
|------------------|------------------|----------------|-------------------------|-----------|-----------|
|                  |                  |                | X                       | Y         | Z         |
| 1                | 16               | 0              | 3.622621                | 2.201560  | 1.884006  |
| 2                | 16               | 0              | -3.622621               | 2.201560  | -1.884006 |
| 3                | 16               | 0              | -3.622621               | -2.201560 | 1.884006  |
| 4                | 16               | 0              | 3.622621                | -2.201560 | -1.884006 |
| 5                | 9                | 0              | 3.841163                | -1.198712 | -0.682854 |
| 6                | 9                | 0              | -3.841163               | -1.198712 | 0.682854  |
| 7                | 9                | 0              | -3.815447               | -1.015033 | 2.908621  |
| 8                | 9                | 0              | 3.841163                | 1.198712  | 0.682854  |
| 9                | 9                | 0              | 3.815447                | 1.015033  | 2.908621  |
| 10               | 9                | 0              | -3.841163               | 1.198712  | -0.682854 |
| 11               | 9                | 0              | -3.815447               | 1.015033  | -2.908621 |
| 12               | 9                | 0              | 3.815447                | -1.015033 | -2.908621 |
| 13               | 9                | 0              | -5.175119               | 2.490417  | -1.924191 |
| 14               | 9                | 0              | -5.175119               | -2.490417 | 1.924191  |
| 15               | 9                | 0              | 5.175119                | 2.490417  | 1.924191  |
| 16               | 9                | 0              | 5.175119                | -2.490417 | -1.924191 |

|    |    |   |           |           |           |
|----|----|---|-----------|-----------|-----------|
| 17 | 9  | 0 | -2.067673 | -1.914258 | 1.845203  |
| 18 | 9  | 0 | 2.067673  | 1.914258  | 1.845203  |
| 19 | 9  | 0 | 2.067673  | -1.914258 | -1.845203 |
| 20 | 9  | 0 | -2.067673 | 1.914258  | -1.845203 |
| 21 | 9  | 0 | 3.426918  | -3.386920 | -0.858407 |
| 22 | 9  | 0 | 3.426918  | 3.386920  | 0.858407  |
| 23 | 9  | 0 | -3.426918 | -3.386920 | 0.858407  |
| 24 | 9  | 0 | -3.426918 | 3.386920  | -0.858407 |
| 25 | 9  | 0 | -3.405351 | -3.204176 | 3.085192  |
| 26 | 9  | 0 | 3.405351  | 3.204176  | 3.085192  |
| 27 | 9  | 0 | -3.405351 | 3.204176  | -3.085192 |
| 28 | 9  | 0 | 3.405351  | -3.204176 | -3.085192 |
| 29 | 16 | 0 | 0.000000  | 0.000000  | 0.000000  |
| 30 | 9  | 0 | 0.000000  | 1.580680  | 0.000000  |
| 31 | 9  | 0 | -0.000000 | -1.580680 | 0.000000  |
| 32 | 9  | 0 | 0.000000  | 0.000000  | 1.580444  |
| 33 | 9  | 0 | 0.000000  | 0.000000  | -1.580444 |
| 34 | 9  | 0 | 1.579294  | -0.000000 | -0.000000 |
| 35 | 9  | 0 | -1.579294 | 0.000000  | -0.000000 |

(SF6)5 C2 cc3-sf6bbx

Standard orientation:

| Center<br>Number | Atomic<br>Number | Atomic<br>Type | Coordinates (Angstroms) |           |           |
|------------------|------------------|----------------|-------------------------|-----------|-----------|
|                  |                  |                | X                       | Y         | Z         |
| 1                | 16               | 0              | -3.625957               | 2.076767  | 2.099756  |
| 2                | 16               | 0              | 3.625957                | -2.076767 | 2.099756  |
| 3                | 16               | 0              | 3.530356                | 1.962939  | -2.149457 |
| 4                | 16               | 0              | -3.530356               | -1.962939 | -2.149457 |
| 5                | 9                | 0              | -3.815098               | -0.759060 | -1.166413 |
| 6                | 9                | 0              | 3.815098                | 0.759060  | -1.166413 |
| 7                | 9                | 0              | 3.767822                | 2.983431  | -0.967333 |
| 8                | 9                | 0              | -3.871791               | 1.116009  | 0.869601  |
| 9                | 9                | 0              | -3.737502               | 3.328701  | 1.142648  |
| 10               | 9                | 0              | 3.871791                | -1.116009 | 0.869601  |
| 11               | 9                | 0              | 3.737502                | -3.328701 | 1.142648  |
| 12               | 9                | 0              | -3.767822               | -2.983431 | -0.967333 |
| 13               | 9                | 0              | 5.182457                | -2.137109 | 2.362786  |
| 14               | 9                | 0              | 5.065567                | 2.027261  | -2.515357 |
| 15               | 9                | 0              | -5.182457               | 2.137109  | 2.362786  |
| 16               | 9                | 0              | -5.065567               | -2.027261 | -2.515357 |
| 17               | 9                | 0              | 1.992748                | 1.900537  | -1.784697 |
| 18               | 9                | 0              | -2.067247               | 2.017954  | 1.838296  |
| 19               | 9                | 0              | -1.992748               | -1.900537 | -1.784697 |
| 20               | 9                | 0              | 2.067247                | -2.017954 | 1.838296  |
| 21               | 9                | 0              | -3.290367               | -0.941381 | -3.330140 |
| 22               | 9                | 0              | -3.511652               | 0.824107  | 3.055192  |
| 23               | 9                | 0              | 3.290367                | 0.941381  | -3.330140 |
| 24               | 9                | 0              | 3.511652                | -0.824107 | 3.055192  |
| 25               | 9                | 0              | 3.245967                | 3.166568  | -3.132280 |
| 26               | 9                | 0              | -3.380997               | 3.037904  | 3.329309  |
| 27               | 9                | 0              | 3.380997                | -3.037904 | 3.329309  |
| 28               | 9                | 0              | -3.245967               | -3.166568 | -3.132280 |
| 29               | 16               | 0              | 0.000000                | -0.000000 | 0.099637  |
| 30               | 9                | 0              | 0.000000                | -0.000000 | 1.679985  |
| 31               | 9                | 0              | -0.000000               | 0.000000  | -1.480856 |
| 32               | 9                | 0              | 0.000000                | 1.580326  | 0.098673  |

|    |   |   |           |           |          |
|----|---|---|-----------|-----------|----------|
| 33 | 9 | 0 | -0.000000 | -1.580326 | 0.098673 |
| 34 | 9 | 0 | -1.580030 | -0.000454 | 0.099940 |
| 35 | 9 | 0 | 1.580030  | 0.000454  | 0.099940 |

CO2@CC3-a C3 cc3-rco2

Standard orientation:

| Center Number | Atomic Number | Atomic Type | Coordinates (Angstroms) |           |           |
|---------------|---------------|-------------|-------------------------|-----------|-----------|
|               |               |             | X                       | Y         | Z         |
| 1             | 7             | 0           | -0.334986               | 4.781575  | 3.035431  |
| 2             | 7             | 0           | 2.399993                | 3.982185  | 3.251635  |
| 3             | 7             | 0           | 5.019563                | 1.644147  | -2.109453 |
| 4             | 7             | 0           | 3.602421                | 0.886645  | -4.497716 |
| 5             | 6             | 0           | -1.947582               | 3.667684  | 0.935751  |
| 6             | 1             | 0           | -1.304508               | 4.507517  | 0.685642  |
| 7             | 6             | 0           | -1.844286               | 3.104198  | 2.215440  |
| 8             | 6             | 0           | -0.919294               | 3.671109  | 3.217269  |
| 9             | 1             | 0           | -0.792503               | 3.084997  | 4.140625  |
| 10            | 6             | 0           | 0.530018                | 5.274408  | 4.088121  |
| 11            | 1             | 0           | 0.532714                | 4.597690  | 4.961493  |
| 12            | 6             | 0           | 1.970321                | 5.332384  | 3.551377  |
| 13            | 1             | 0           | 1.960349                | 5.966499  | 2.646392  |
| 14            | 6             | 0           | 2.908407                | 5.945828  | 4.595486  |
| 15            | 1             | 0           | 3.921916                | 5.985979  | 4.181860  |
| 16            | 1             | 0           | 2.943674                | 5.272219  | 5.461481  |
| 17            | 6             | 0           | 2.434573                | 7.334167  | 5.027316  |
| 18            | 1             | 0           | 3.111067                | 7.741175  | 5.786175  |
| 19            | 1             | 0           | 2.473451                | 8.016994  | 4.167609  |
| 20            | 6             | 0           | 1.001331                | 7.277796  | 5.559549  |
| 21            | 1             | 0           | 0.654201                | 8.278864  | 5.836207  |
| 22            | 1             | 0           | 0.979902                | 6.669668  | 6.474178  |
| 23            | 6             | 0           | 0.060368                | 6.666689  | 4.520637  |
| 24            | 1             | 0           | 0.016153                | 7.305215  | 3.628811  |
| 25            | 1             | 0           | -0.960966               | 6.591758  | 4.909297  |
| 26            | 6             | 0           | 2.681054                | 3.698976  | 2.048492  |
| 27            | 1             | 0           | 2.621183                | 4.445905  | 1.241777  |
| 28            | 6             | 0           | 3.142241                | 2.353972  | 1.651771  |
| 29            | 6             | 0           | 3.101230                | 1.290176  | 2.564809  |
| 30            | 1             | 0           | 2.688148                | 1.468698  | 3.554489  |
| 31            | 6             | 0           | 3.610458                | 0.045100  | 2.215440  |
| 32            | 6             | 0           | 4.150098                | -0.147186 | 0.935751  |
| 33            | 1             | 0           | 4.555878                | -1.124022 | 0.685642  |
| 34            | 6             | 0           | 4.186766                | 0.898149  | 0.021539  |
| 35            | 6             | 0           | 3.674320                | 2.151534  | 0.384633  |
| 36            | 1             | 0           | 3.724975                | 2.962078  | -0.337792 |
| 37            | 6             | 0           | 4.816888                | 0.691615  | -1.297822 |
| 38            | 1             | 0           | 5.127173                | -0.340905 | -1.521615 |
| 39            | 6             | 0           | 5.697293                | 1.338505  | -3.354321 |
| 40            | 1             | 0           | 5.912369                | 0.258229  | -3.443111 |
| 41            | 6             | 0           | 4.785737                | 1.722725  | -4.530530 |
| 42            | 1             | 0           | 4.530248                | 2.791734  | -4.415228 |
| 43            | 6             | 0           | 5.512196                | 1.514363  | -5.863739 |
| 44            | 1             | 0           | 4.843621                | 1.808317  | -6.680178 |
| 45            | 1             | 0           | 5.707925                | 0.440765  | -5.982953 |
| 46            | 6             | 0           | 6.824158                | 2.297644  | -5.917781 |
| 47            | 1             | 0           | 6.608961                | 3.373964  | -5.872454 |
| 48            | 1             | 0           | 7.330216                | 2.115297  | -6.871654 |

|     |   |   |           |           |           |
|-----|---|---|-----------|-----------|-----------|
| 49  | 6 | 0 | 7.731239  | 1.916921  | -4.746381 |
| 50  | 1 | 0 | 8.022177  | 0.862034  | -4.843412 |
| 51  | 1 | 0 | 8.655374  | 2.504056  | -4.768253 |
| 52  | 6 | 0 | 7.011535  | 2.124760  | -3.413435 |
| 53  | 1 | 0 | 6.781209  | 3.188500  | -3.270195 |
| 54  | 1 | 0 | 7.643923  | 1.820133  | -2.572431 |
| 55  | 6 | 0 | 2.476640  | 1.458644  | -4.385533 |
| 56  | 1 | 0 | 2.383871  | 2.553411  | -4.311487 |
| 57  | 7 | 0 | -4.648670 | 0.087362  | 3.251635  |
| 58  | 7 | 0 | -3.973472 | -2.680894 | 3.035431  |
| 59  | 7 | 0 | 2.248677  | -4.069547 | 3.251635  |
| 60  | 7 | 0 | 4.308458  | -2.100681 | 3.035431  |
| 61  | 6 | 0 | -2.667940 | 2.040657  | 2.564809  |
| 62  | 1 | 0 | -2.616004 | 1.593655  | 3.554489  |
| 63  | 6 | 0 | -3.609719 | 1.544274  | 1.651771  |
| 64  | 6 | 0 | -4.543934 | 0.472373  | 2.048492  |
| 65  | 1 | 0 | -5.160858 | 0.047058  | 1.241777  |
| 66  | 6 | 0 | -5.603140 | -0.959843 | 3.551377  |
| 67  | 1 | 0 | -6.147314 | -1.285537 | 2.646392  |
| 68  | 6 | 0 | -4.832780 | -2.178195 | 4.088121  |
| 69  | 1 | 0 | -4.248074 | -1.837501 | 4.961493  |
| 70  | 6 | 0 | -5.803706 | -3.281065 | 4.520637  |
| 71  | 1 | 0 | -5.228147 | -4.128100 | 4.909297  |
| 72  | 1 | 0 | -6.334578 | -3.638618 | 3.628811  |
| 73  | 6 | 0 | -6.803421 | -2.771720 | 5.559549  |
| 74  | 1 | 0 | -7.496807 | -3.572877 | 5.836207  |
| 75  | 1 | 0 | -6.266053 | -2.486214 | 6.474178  |
| 76  | 6 | 0 | -7.568861 | -1.558681 | 5.027316  |
| 77  | 1 | 0 | -8.259587 | -1.176324 | 5.786175  |
| 78  | 1 | 0 | -8.179646 | -1.866426 | 4.167609  |
| 79  | 6 | 0 | -6.603442 | -0.454159 | 4.595486  |
| 80  | 1 | 0 | -6.037713 | -0.086813 | 5.461481  |
| 81  | 1 | 0 | -7.144968 | 0.403490  | 4.181860  |
| 82  | 6 | 0 | -2.719627 | -2.631687 | 3.217269  |
| 83  | 1 | 0 | -2.275434 | -2.228826 | 4.140625  |
| 84  | 6 | 0 | -1.766171 | -3.149298 | 2.215440  |
| 85  | 6 | 0 | -2.202516 | -3.520497 | 0.935751  |
| 86  | 1 | 0 | -3.251371 | -3.383496 | 0.685642  |
| 87  | 6 | 0 | -1.315564 | -4.074920 | 0.021539  |
| 88  | 6 | 0 | 0.026123  | -4.257821 | 0.384633  |
| 89  | 1 | 0 | 0.702747  | -4.706962 | -0.337792 |
| 90  | 6 | 0 | 0.467479  | -3.898246 | 1.651771  |
| 91  | 6 | 0 | -0.433290 | -3.330832 | 2.564809  |
| 92  | 1 | 0 | -0.072144 | -3.062353 | 3.554489  |
| 93  | 6 | 0 | 1.862880  | -4.171349 | 2.048492  |
| 94  | 1 | 0 | 2.539675  | -4.492963 | 1.241777  |
| 95  | 6 | 0 | 3.632819  | -4.372540 | 3.551377  |
| 96  | 1 | 0 | 4.186965  | -4.680961 | 2.646392  |
| 97  | 6 | 0 | 4.302762  | -3.096213 | 4.088121  |
| 98  | 1 | 0 | 3.715360  | -2.760189 | 4.961493  |
| 99  | 6 | 0 | 5.743338  | -3.385624 | 4.520637  |
| 100 | 1 | 0 | 6.189113  | -2.463658 | 4.909297  |
| 101 | 1 | 0 | 6.318425  | -3.666597 | 3.628811  |
| 102 | 6 | 0 | 5.802091  | -4.506076 | 5.559549  |
| 103 | 1 | 0 | 5.286151  | -4.183454 | 6.474178  |
| 104 | 1 | 0 | 6.842606  | -4.705987 | 5.836207  |
| 105 | 6 | 0 | 5.134288  | -5.775486 | 5.027316  |
| 106 | 1 | 0 | 5.706195  | -6.150569 | 4.167609  |
| 107 | 1 | 0 | 5.148520  | -6.564850 | 5.786175  |



|     |   |   |           |           |           |
|-----|---|---|-----------|-----------|-----------|
| 108 | 6 | 0 | 3.695034  | -5.491668 | 4.595486  |
| 109 | 1 | 0 | 3.094038  | -5.185406 | 5.461481  |
| 110 | 1 | 0 | 3.223052  | -6.389468 | 4.181860  |
| 111 | 6 | 0 | 3.638921  | -1.039423 | 3.217269  |
| 112 | 1 | 0 | 3.067937  | -0.856170 | 4.140625  |
| 113 | 7 | 0 | -3.933655 | 3.524996  | -2.109453 |
| 114 | 7 | 0 | -2.569068 | 2.676466  | -4.497716 |
| 115 | 7 | 0 | -1.033353 | -3.563111 | -4.497716 |
| 116 | 7 | 0 | -1.085908 | -5.169143 | -2.109453 |
| 117 | 6 | 0 | -3.700443 | 2.106288  | 0.384633  |
| 118 | 1 | 0 | -4.427722 | 1.744884  | -0.337792 |
| 119 | 6 | 0 | -2.871203 | 3.176772  | 0.021539  |
| 120 | 6 | 0 | -3.007400 | 3.825740  | -1.297822 |
| 121 | 1 | 0 | -2.268354 | 4.610715  | -1.521615 |
| 122 | 6 | 0 | -4.007826 | 4.264748  | -3.354321 |
| 123 | 1 | 0 | -3.179817 | 4.991147  | -3.443111 |
| 124 | 6 | 0 | -3.884792 | 3.283207  | -4.530530 |
| 125 | 1 | 0 | -4.682836 | 2.527443  | -4.415228 |
| 126 | 6 | 0 | -4.067575 | 4.016520  | -5.863739 |
| 127 | 1 | 0 | -3.987859 | 3.290541  | -6.680178 |
| 128 | 1 | 0 | -3.235676 | 4.722825  | -5.982953 |
| 129 | 6 | 0 | -5.401897 | 4.761072  | -5.917781 |
| 130 | 1 | 0 | -5.497009 | 5.290504  | -6.871654 |
| 131 | 1 | 0 | -6.226419 | 4.036546  | -5.872454 |
| 132 | 6 | 0 | -5.525722 | 5.736989  | -4.746381 |
| 133 | 1 | 0 | -6.496263 | 6.243746  | -4.768253 |
| 134 | 1 | 0 | -4.757632 | 6.516392  | -4.843412 |
| 135 | 6 | 0 | -5.345863 | 5.009787  | -3.413435 |
| 136 | 1 | 0 | -6.151926 | 4.278449  | -3.270195 |
| 137 | 1 | 0 | -5.398242 | 5.709765  | -2.572431 |
| 138 | 6 | 0 | -2.501543 | 1.415512  | -4.385533 |
| 139 | 1 | 0 | -3.403254 | 0.787787  | -4.311487 |
| 140 | 6 | 0 | -1.214963 | 0.692815  | -4.362847 |
| 141 | 6 | 0 | 0.000000  | 1.392177  | -4.361234 |
| 142 | 1 | 0 | -0.026792 | 2.478794  | -4.364807 |
| 143 | 6 | 0 | 1.207477  | 0.705781  | -4.362847 |
| 144 | 6 | 0 | 1.205660  | -0.696088 | -4.361234 |
| 145 | 1 | 0 | 2.160094  | -1.216194 | -4.364807 |
| 146 | 6 | 0 | 0.007486  | -1.398596 | -4.362847 |
| 147 | 6 | 0 | -1.205660 | -0.696088 | -4.361234 |
| 148 | 1 | 0 | -2.133302 | -1.262599 | -4.364807 |
| 149 | 6 | 0 | 0.024902  | -2.874155 | -4.385533 |
| 150 | 1 | 0 | 1.019383  | -3.341198 | -4.311487 |
| 151 | 6 | 0 | -0.900945 | -5.005932 | -4.530530 |
| 152 | 1 | 0 | 0.152588  | -5.319176 | -4.415228 |
| 153 | 6 | 0 | -1.689468 | -5.603253 | -3.354321 |
| 154 | 1 | 0 | -2.732552 | -5.249376 | -3.443111 |
| 155 | 6 | 0 | -1.665671 | -7.134547 | -3.413435 |
| 156 | 1 | 0 | -2.245680 | -7.529897 | -2.572431 |
| 157 | 1 | 0 | -0.629283 | -7.466949 | -3.270195 |
| 158 | 6 | 0 | -2.205517 | -7.653910 | -4.746381 |
| 159 | 1 | 0 | -3.264545 | -7.378426 | -4.843412 |
| 160 | 1 | 0 | -2.159111 | -8.747802 | -4.768253 |
| 161 | 6 | 0 | -1.422261 | -7.058716 | -5.917781 |
| 162 | 1 | 0 | -0.382542 | -7.410510 | -5.872454 |
| 163 | 1 | 0 | -1.833207 | -7.405801 | -6.871654 |
| 164 | 6 | 0 | -1.444621 | -5.530883 | -5.863739 |
| 165 | 1 | 0 | -2.472248 | -5.163591 | -5.982953 |
| 166 | 1 | 0 | -0.855762 | -5.098857 | -6.680178 |

|     |   |   |           |           |           |
|-----|---|---|-----------|-----------|-----------|
| 167 | 6 | 0 | -1.809488 | -4.517355 | -1.297822 |
| 168 | 1 | 0 | -2.858819 | -4.269810 | -1.521615 |
| 169 | 6 | 0 | 0.000000  | 0.000000  | 2.033575  |
| 170 | 8 | 0 | 0.000000  | 0.000000  | 3.200064  |
| 171 | 8 | 0 | 0.000000  | 0.000000  | 0.873073  |

CO2@CC3-b C2 cc3-rj0

Standard orientation:

| Center Number | Atomic Number | Atomic Type | Coordinates (Angstroms) |           |           |
|---------------|---------------|-------------|-------------------------|-----------|-----------|
|               |               |             | X                       | Y         | Z         |
| 1             | 7             | 0           | 3.752002                | 4.168857  | -1.178335 |
| 2             | 7             | 0           | 4.979727                | 2.794518  | 1.046500  |
| 3             | 7             | 0           | 4.453011                | -3.618612 | 0.800741  |
| 4             | 7             | 0           | 2.627891                | -4.998660 | -0.966210 |
| 5             | 6             | 0           | 1.669467                | 3.022941  | -2.794177 |
| 6             | 1             | 0           | 2.698392                | 2.760739  | -3.026757 |
| 7             | 6             | 0           | 1.422173                | 3.836685  | -1.679375 |
| 8             | 6             | 0           | 2.538111                | 4.355410  | -0.862934 |
| 9             | 1             | 0           | 2.249200                | 4.938712  | 0.025159  |
| 10            | 6             | 0           | 4.770494                | 4.776744  | -0.344201 |
| 11            | 1             | 0           | 4.328031                | 5.275175  | 0.537192  |
| 12            | 6             | 0           | 5.719061                | 3.684092  | 0.173325  |
| 13            | 1             | 0           | 6.118970                | 3.148765  | -0.706882 |
| 14            | 6             | 0           | 6.877763                | 4.305634  | 0.961161  |
| 15            | 1             | 0           | 7.541789                | 3.504437  | 1.303509  |
| 16            | 1             | 0           | 6.463944                | 4.782107  | 1.859434  |
| 17            | 6             | 0           | 7.640836                | 5.333287  | 0.125162  |
| 18            | 1             | 0           | 8.449357                | 5.772794  | 0.718765  |
| 19            | 1             | 0           | 8.111475                | 4.830904  | -0.730957 |
| 20            | 6             | 0           | 6.696814                | 6.421911  | -0.387912 |
| 21            | 1             | 0           | 7.239036                | 7.138059  | -1.014317 |
| 22            | 1             | 0           | 6.297130                | 6.985108  | 0.466400  |
| 23            | 6             | 0           | 5.540877                | 5.807573  | -1.177575 |
| 24            | 1             | 0           | 5.922290                | 5.305060  | -2.076017 |
| 25            | 1             | 0           | 4.841666                | 6.579228  | -1.517729 |
| 26            | 6             | 0           | 4.935730                | 1.564498  | 0.743494  |
| 27            | 1             | 0           | 5.430351                | 1.166366  | -0.156152 |
| 28            | 6             | 0           | 4.231323                | 0.573548  | 1.581304  |
| 29            | 6             | 0           | 3.500944                | 0.981498  | 2.705757  |
| 30            | 1             | 0           | 3.452202                | 2.042335  | 2.937156  |
| 31            | 6             | 0           | 2.848380                | 0.045719  | 3.499068  |
| 32            | 6             | 0           | 2.922014                | -1.314659 | 3.167177  |
| 33            | 1             | 0           | 2.396303                | -2.031334 | 3.792779  |
| 34            | 6             | 0           | 3.645377                | -1.729877 | 2.055571  |
| 35            | 6             | 0           | 4.299514                | -0.777493 | 1.261872  |
| 36            | 1             | 0           | 4.861322                | -1.120717 | 0.396843  |
| 37            | 6             | 0           | 3.728959                | -3.169393 | 1.739416  |
| 38            | 1             | 0           | 3.131252                | -3.832737 | 2.383507  |
| 39            | 6             | 0           | 4.488560                | -5.055066 | 0.605215  |
| 40            | 1             | 0           | 3.808379                | -5.575520 | 1.303467  |
| 41            | 6             | 0           | 4.019574                | -5.379970 | -0.821122 |
| 42            | 1             | 0           | 4.667585                | -4.818075 | -1.518020 |
| 43            | 6             | 0           | 4.153220                | -6.881060 | -1.102821 |
| 44            | 1             | 0           | 3.825295                | -7.077605 | -2.129388 |
| 45            | 1             | 0           | 3.461791                | -7.416747 | -0.439420 |
| 46            | 6             | 0           | 5.583599                | -7.371832 | -0.878497 |

|     |   |   |           |           |           |
|-----|---|---|-----------|-----------|-----------|
| 47  | 1 | 0 | 6.254467  | -6.883625 | -1.598506 |
| 48  | 1 | 0 | 5.643991  | -8.448676 | -1.068277 |
| 49  | 6 | 0 | 6.049919  | -7.048797 | 0.541877  |
| 50  | 1 | 0 | 5.436721  | -7.610686 | 1.259565  |
| 51  | 1 | 0 | 7.086206  | -7.370556 | 0.689737  |
| 52  | 6 | 0 | 5.921786  | -5.551958 | 0.826176  |
| 53  | 1 | 0 | 6.587035  | -4.983613 | 0.163132  |
| 54  | 1 | 0 | 6.221816  | -5.318621 | 1.853568  |
| 55  | 6 | 0 | 2.337307  | -4.170686 | -1.881215 |
| 56  | 1 | 0 | 3.107521  | -3.733513 | -2.535849 |
| 57  | 7 | 0 | -2.627891 | 4.998660  | -0.966210 |
| 58  | 7 | 0 | -4.453011 | 3.618612  | 0.800741  |
| 59  | 7 | 0 | -1.415807 | 0.308395  | 5.400632  |
| 60  | 7 | 0 | 1.415807  | -0.308395 | 5.400632  |
| 61  | 6 | 0 | 0.115797  | 4.194133  | -1.368387 |
| 62  | 1 | 0 | -0.102593 | 4.829649  | -0.513998 |
| 63  | 6 | 0 | -0.950030 | 3.754310  | -2.166430 |
| 64  | 6 | 0 | -2.337307 | 4.170686  | -1.881215 |
| 65  | 1 | 0 | -3.107521 | 3.733513  | -2.535849 |
| 66  | 6 | 0 | -4.019574 | 5.379970  | -0.821122 |
| 67  | 1 | 0 | -4.667585 | 4.818075  | -1.518020 |
| 68  | 6 | 0 | -4.488560 | 5.055066  | 0.605215  |
| 69  | 1 | 0 | -3.808379 | 5.575520  | 1.303467  |
| 70  | 6 | 0 | -5.921786 | 5.551958  | 0.826176  |
| 71  | 1 | 0 | -6.221816 | 5.318621  | 1.853568  |
| 72  | 1 | 0 | -6.587035 | 4.983613  | 0.163132  |
| 73  | 6 | 0 | -6.049919 | 7.048797  | 0.541877  |
| 74  | 1 | 0 | -7.086206 | 7.370556  | 0.689737  |
| 75  | 1 | 0 | -5.436721 | 7.610686  | 1.259565  |
| 76  | 6 | 0 | -5.583599 | 7.371832  | -0.878497 |
| 77  | 1 | 0 | -5.643991 | 8.448676  | -1.068277 |
| 78  | 1 | 0 | -6.254467 | 6.883625  | -1.598506 |
| 79  | 6 | 0 | -4.153220 | 6.881060  | -1.102821 |
| 80  | 1 | 0 | -3.461791 | 7.416747  | -0.439420 |
| 81  | 1 | 0 | -3.825295 | 7.077605  | -2.129388 |
| 82  | 6 | 0 | -3.728959 | 3.169393  | 1.739416  |
| 83  | 1 | 0 | -3.131252 | 3.832737  | 2.383507  |
| 84  | 6 | 0 | -3.645377 | 1.729877  | 2.055571  |
| 85  | 6 | 0 | -4.299514 | 0.777493  | 1.261872  |
| 86  | 1 | 0 | -4.861322 | 1.120717  | 0.396843  |
| 87  | 6 | 0 | -4.231323 | -0.573548 | 1.581304  |
| 88  | 6 | 0 | -3.500944 | -0.981498 | 2.705757  |
| 89  | 1 | 0 | -3.452202 | -2.042335 | 2.937156  |
| 90  | 6 | 0 | -2.848380 | -0.045719 | 3.499068  |
| 91  | 6 | 0 | -2.922014 | 1.314659  | 3.167177  |
| 92  | 1 | 0 | -2.396303 | 2.031334  | 3.792779  |
| 93  | 6 | 0 | -2.070534 | -0.496945 | 4.671244  |
| 94  | 1 | 0 | -2.089156 | -1.580151 | 4.867103  |
| 95  | 6 | 0 | -0.728918 | -0.238508 | 6.556301  |
| 96  | 1 | 0 | -0.718664 | -1.342997 | 6.532843  |
| 97  | 6 | 0 | 0.728918  | 0.238508  | 6.556301  |
| 98  | 1 | 0 | 0.718664  | 1.342997  | 6.532843  |
| 99  | 6 | 0 | 1.449058  | -0.233076 | 7.825758  |
| 100 | 1 | 0 | 2.480897  | 0.134317  | 7.802099  |
| 101 | 1 | 0 | 1.500252  | -1.329552 | 7.804622  |
| 102 | 6 | 0 | 0.727471  | 0.236001  | 9.089420  |
| 103 | 1 | 0 | 0.751106  | 1.333192  | 9.136882  |
| 104 | 1 | 0 | 1.251396  | -0.131764 | 9.977917  |
| 105 | 6 | 0 | -0.727471 | -0.236001 | 9.089420  |

|     |   |   |           |           |            |
|-----|---|---|-----------|-----------|------------|
| 106 | 1 | 0 | -0.751106 | -1.333192 | 9.136882   |
| 107 | 1 | 0 | -1.251396 | 0.131764  | 9.977917   |
| 108 | 6 | 0 | -1.449058 | 0.233076  | 7.825758   |
| 109 | 1 | 0 | -1.500252 | 1.329552  | 7.804622   |
| 110 | 1 | 0 | -2.480897 | -0.134317 | 7.802099   |
| 111 | 6 | 0 | 2.070534  | 0.496945  | 4.671244   |
| 112 | 1 | 0 | 2.089156  | 1.580151  | 4.867103   |
| 113 | 7 | 0 | 0.000000  | 1.439178  | -5.615059  |
| 114 | 7 | 0 | -0.000000 | -1.439178 | -5.615059  |
| 115 | 7 | 0 | -3.752002 | -4.168857 | -1.178335  |
| 116 | 7 | 0 | -4.979727 | -2.794518 | 1.046500   |
| 117 | 6 | 0 | -0.692996 | 2.949209  | -3.269014  |
| 118 | 1 | 0 | -1.500279 | 2.602357  | -3.908918  |
| 119 | 6 | 0 | 0.620671  | 2.580497  | -3.590325  |
| 120 | 6 | 0 | 0.902917  | 1.760550  | -4.785102  |
| 121 | 1 | 0 | 1.953613  | 1.460346  | -4.921261  |
| 122 | 6 | 0 | 0.390985  | 0.661683  | -6.774277  |
| 123 | 1 | 0 | 1.466604  | 0.409512  | -6.748931  |
| 124 | 6 | 0 | -0.390985 | -0.661683 | -6.774277  |
| 125 | 1 | 0 | -1.466604 | -0.409512 | -6.748931  |
| 126 | 6 | 0 | -0.086968 | -1.465840 | -8.042998  |
| 127 | 1 | 0 | -0.667602 | -2.394477 | -8.020355  |
| 128 | 1 | 0 | 0.972702  | -1.751814 | -8.021556  |
| 129 | 6 | 0 | -0.388626 | -0.658741 | -9.306030  |
| 130 | 1 | 0 | -0.144694 | -1.249654 | -10.195165 |
| 131 | 1 | 0 | -1.464709 | -0.442701 | -9.352987  |
| 132 | 6 | 0 | 0.388626  | 0.658741  | -9.306030  |
| 133 | 1 | 0 | 0.144694  | 1.249654  | -10.195165 |
| 134 | 1 | 0 | 1.464709  | 0.442701  | -9.352987  |
| 135 | 6 | 0 | 0.086968  | 1.465840  | -8.042998  |
| 136 | 1 | 0 | -0.972702 | 1.751814  | -8.021556  |
| 137 | 1 | 0 | 0.667602  | 2.394477  | -8.020355  |
| 138 | 6 | 0 | -0.902917 | -1.760550 | -4.785102  |
| 139 | 1 | 0 | -1.953613 | -1.460346 | -4.921261  |
| 140 | 6 | 0 | -0.620671 | -2.580497 | -3.590325  |
| 141 | 6 | 0 | 0.692996  | -2.949209 | -3.269014  |
| 142 | 1 | 0 | 1.500279  | -2.602357 | -3.908918  |
| 143 | 6 | 0 | 0.950030  | -3.754310 | -2.166430  |
| 144 | 6 | 0 | -0.115797 | -4.194133 | -1.368387  |
| 145 | 1 | 0 | 0.102593  | -4.829649 | -0.513998  |
| 146 | 6 | 0 | -1.422173 | -3.836685 | -1.679375  |
| 147 | 6 | 0 | -1.669467 | -3.022941 | -2.794177  |
| 148 | 1 | 0 | -2.698392 | -2.760739 | -3.026757  |
| 149 | 6 | 0 | -2.538111 | -4.355410 | -0.862934  |
| 150 | 1 | 0 | -2.249200 | -4.938712 | 0.025159   |
| 151 | 6 | 0 | -4.770494 | -4.776744 | -0.344201  |
| 152 | 1 | 0 | -4.328031 | -5.275175 | 0.537192   |
| 153 | 6 | 0 | -5.719061 | -3.684092 | 0.173325   |
| 154 | 1 | 0 | -6.118970 | -3.148765 | -0.706882  |
| 155 | 6 | 0 | -6.877763 | -4.305634 | 0.961161   |
| 156 | 1 | 0 | -7.541789 | -3.504437 | 1.303509   |
| 157 | 1 | 0 | -6.463944 | -4.782107 | 1.859434   |
| 158 | 6 | 0 | -7.640836 | -5.333287 | 0.125162   |
| 159 | 1 | 0 | -8.111475 | -4.830904 | -0.730957  |
| 160 | 1 | 0 | -8.449357 | -5.772794 | 0.718765   |
| 161 | 6 | 0 | -6.696814 | -6.421911 | -0.387912  |
| 162 | 1 | 0 | -6.297130 | -6.985108 | 0.466400   |
| 163 | 1 | 0 | -7.239036 | -7.138059 | -1.014317  |
| 164 | 6 | 0 | -5.540877 | -5.807573 | -1.177575  |

|     |   |   |           |           |           |
|-----|---|---|-----------|-----------|-----------|
| 165 | 1 | 0 | -5.922290 | -5.305060 | -2.076017 |
| 166 | 1 | 0 | -4.841666 | -6.579228 | -1.517729 |
| 167 | 6 | 0 | -4.935730 | -1.564498 | 0.743494  |
| 168 | 1 | 0 | -5.430351 | -1.166366 | -0.156152 |
| 169 | 6 | 0 | 0.000000  | 0.000000  | 2.419432  |
| 170 | 8 | 0 | -0.103721 | -1.158734 | 2.416518  |
| 171 | 8 | 0 | 0.103721  | 1.158734  | 2.416518  |

-----  
 4CO2@CC3-a C2 cc3-rjj

Standard orientation:

| Center<br>Number | Atomic<br>Number | Atomic<br>Type | Coordinates (Angstroms) |           |           |
|------------------|------------------|----------------|-------------------------|-----------|-----------|
|                  |                  |                | X                       | Y         | Z         |
| 1                | 7                | 0              | 1.376803                | -0.436846 | -5.400067 |
| 2                | 7                | 0              | -1.376803               | 0.436846  | -5.400067 |
| 3                | 7                | 0              | -3.320250               | 4.800984  | -1.094026 |
| 4                | 7                | 0              | -1.669764               | 5.482548  | 1.142275  |
| 5                | 6                | 0              | 3.060848                | -0.173106 | -3.120169 |
| 6                | 1                | 0              | 2.877878                | 0.702985  | -3.737604 |
| 7                | 6                | 0              | 2.387063                | -1.360767 | -3.432191 |
| 8                | 6                | 0              | 1.476223                | -1.410772 | -4.594175 |
| 9                | 1                | 0              | 0.910533                | -2.346120 | -4.727323 |
| 10               | 6                | 0              | 0.507476                | -0.576693 | -6.550395 |
| 11               | 1                | 0              | -0.063094               | -1.522412 | -6.517345 |
| 12               | 6                | 0              | -0.507476               | 0.576693  | -6.550395 |
| 13               | 1                | 0              | 0.063094                | 1.522412  | -6.517345 |
| 14               | 6                | 0              | -1.364025               | 0.541954  | -7.821749 |
| 15               | 1                | 0              | -2.063770               | 1.384478  | -7.798422 |
| 16               | 1                | 0              | -1.968080               | -0.374496 | -7.801882 |
| 17               | 6                | 0              | -0.502814               | 0.576209  | -9.084346 |
| 18               | 1                | 0              | -1.140655               | 0.531023  | -9.973337 |
| 19               | 1                | 0              | 0.040716                | 1.529724  | -9.130558 |
| 20               | 6                | 0              | 0.502814                | -0.576209 | -9.084346 |
| 21               | 1                | 0              | 1.140655                | -0.531023 | -9.973337 |
| 22               | 1                | 0              | -0.040716               | -1.529724 | -9.130558 |
| 23               | 6                | 0              | 1.364025                | -0.541954 | -7.821749 |
| 24               | 1                | 0              | 1.968080                | 0.374496  | -7.801882 |
| 25               | 1                | 0              | 2.063770                | -1.384478 | -7.798422 |
| 26               | 6                | 0              | -1.476223               | 1.410772  | -4.594175 |
| 27               | 1                | 0              | -0.910533               | 2.346120  | -4.727323 |
| 28               | 6                | 0              | -2.387063               | 1.360767  | -3.432191 |
| 29               | 6                | 0              | -3.060848               | 0.173106  | -3.120169 |
| 30               | 1                | 0              | -2.877878               | -0.702985 | -3.737604 |
| 31               | 6                | 0              | -3.945040               | 0.118966  | -2.051609 |
| 32               | 6                | 0              | -4.165034               | 1.267446  | -1.279382 |
| 33               | 1                | 0              | -4.860541               | 1.208642  | -0.445702 |
| 34               | 6                | 0              | -3.502689               | 2.452847  | -1.581516 |
| 35               | 6                | 0              | -2.607182               | 2.495074  | -2.660314 |
| 36               | 1                | 0              | -2.095785               | 3.429232  | -2.874606 |
| 37               | 6                | 0              | -3.759381               | 3.657453  | -0.768296 |
| 38               | 1                | 0              | -4.369349               | 3.502437  | 0.135998  |
| 39               | 6                | 0              | -3.631848               | 5.916914  | -0.224384 |
| 40               | 1                | 0              | -4.240165               | 5.598425  | 0.641673  |
| 41               | 6                | 0              | -2.315916               | 6.491122  | 0.325637  |
| 42               | 1                | 0              | -1.690602               | 6.770736  | -0.541183 |
| 43               | 6                | 0              | -2.588399               | 7.733925  | 1.179302  |
| 44               | 1                | 0              | -1.634485               | 8.127085  | 1.547380  |

|     |   |   |           |           |           |
|-----|---|---|-----------|-----------|-----------|
| 45  | 1 | 0 | -3.167340 | 7.425525  | 2.059543  |
| 46  | 6 | 0 | -3.353895 | 8.797255  | 0.390965  |
| 47  | 1 | 0 | -2.731789 | 9.151625  | -0.442219 |
| 48  | 1 | 0 | -3.553669 | 9.664752  | 1.028765  |
| 49  | 6 | 0 | -4.660296 | 8.226896  | -0.164816 |
| 50  | 1 | 0 | -5.321854 | 7.960655  | 0.670835  |
| 51  | 1 | 0 | -5.187403 | 8.981341  | -0.758245 |
| 52  | 6 | 0 | -4.392932 | 6.984856  | -1.015954 |
| 53  | 1 | 0 | -3.793885 | 7.250950  | -1.896480 |
| 54  | 1 | 0 | -5.328644 | 6.552270  | -1.386339 |
| 55  | 6 | 0 | -0.512234 | 5.097493  | 0.797169  |
| 56  | 1 | 0 | -0.002512 | 5.497936  | -0.091987 |
| 57  | 7 | 0 | 3.320250  | -4.800984 | -1.094026 |
| 58  | 7 | 0 | 1.669764  | -5.482548 | 1.142275  |
| 59  | 7 | 0 | -4.392932 | -3.329132 | 0.839797  |
| 60  | 7 | 0 | -5.515698 | -1.254795 | -0.848452 |
| 61  | 6 | 0 | 2.607182  | -2.495074 | -2.660314 |
| 62  | 1 | 0 | 2.095785  | -3.429232 | -2.874606 |
| 63  | 6 | 0 | 3.502689  | -2.452847 | -1.581516 |
| 64  | 6 | 0 | 3.759381  | -3.657453 | -0.768296 |
| 65  | 1 | 0 | 4.369349  | -3.502437 | 0.135998  |
| 66  | 6 | 0 | 3.631848  | -5.916914 | -0.224384 |
| 67  | 1 | 0 | 4.240165  | -5.598425 | 0.641673  |
| 68  | 6 | 0 | 2.315916  | -6.491122 | 0.325637  |
| 69  | 1 | 0 | 1.690602  | -6.770736 | -0.541183 |
| 70  | 6 | 0 | 2.588399  | -7.733925 | 1.179302  |
| 71  | 1 | 0 | 1.634485  | -8.127085 | 1.547380  |
| 72  | 1 | 0 | 3.167340  | -7.425525 | 2.059543  |
| 73  | 6 | 0 | 3.353895  | -8.797255 | 0.390965  |
| 74  | 1 | 0 | 3.553669  | -9.664752 | 1.028765  |
| 75  | 1 | 0 | 2.731789  | -9.151625 | -0.442219 |
| 76  | 6 | 0 | 4.660296  | -8.226896 | -0.164816 |
| 77  | 1 | 0 | 5.187403  | -8.981341 | -0.758245 |
| 78  | 1 | 0 | 5.321854  | -7.960655 | 0.670835  |
| 79  | 6 | 0 | 4.392932  | -6.984856 | -1.015954 |
| 80  | 1 | 0 | 3.793885  | -7.250950 | -1.896480 |
| 81  | 1 | 0 | 5.328644  | -6.552270 | -1.386339 |
| 82  | 6 | 0 | 0.512234  | -5.097493 | 0.797169  |
| 83  | 1 | 0 | 0.002512  | -5.497936 | -0.091987 |
| 84  | 6 | 0 | -0.248684 | -4.102785 | 1.580172  |
| 85  | 6 | 0 | 0.343618  | -3.438130 | 2.664864  |
| 86  | 1 | 0 | 1.380673  | -3.659817 | 2.905517  |
| 87  | 6 | 0 | -0.398623 | -2.549738 | 3.432995  |
| 88  | 6 | 0 | -1.736011 | -2.294193 | 3.097574  |
| 89  | 1 | 0 | -2.300086 | -1.592001 | 3.705427  |
| 90  | 6 | 0 | -2.331547 | -2.942915 | 2.024846  |
| 91  | 6 | 0 | -1.582103 | -3.858749 | 1.272645  |
| 92  | 1 | 0 | -2.071746 | -4.384974 | 0.455323  |
| 93  | 6 | 0 | -3.759464 | -2.699566 | 1.739772  |
| 94  | 1 | 0 | -4.249527 | -1.958809 | 2.388860  |
| 95  | 6 | 0 | -5.818748 | -3.078542 | 0.730717  |
| 96  | 1 | 0 | -6.149808 | -2.312951 | 1.455030  |
| 97  | 6 | 0 | -6.144059 | -2.549734 | -0.673932 |
| 98  | 1 | 0 | -5.759396 | -3.287758 | -1.401252 |
| 99  | 6 | 0 | -7.658158 | -2.396782 | -0.855365 |
| 100 | 1 | 0 | -7.857036 | -2.032621 | -1.869142 |
| 101 | 1 | 0 | -8.007512 | -1.619309 | -0.163582 |
| 102 | 6 | 0 | -8.395721 | -3.708585 | -0.586564 |
| 103 | 1 | 0 | -8.091060 | -4.458595 | -1.329250 |

|     |   |   |           |           |           |
|-----|---|---|-----------|-----------|-----------|
| 104 | 1 | 0 | -9.474452 | -3.563100 | -0.706734 |
| 105 | 6 | 0 | -8.075406 | -4.230138 | 0.815010  |
| 106 | 1 | 0 | -8.462040 | -3.522163 | 1.560713  |
| 107 | 1 | 0 | -8.577725 | -5.186482 | 0.994880  |
| 108 | 6 | 0 | -6.566339 | -4.390070 | 0.999532  |
| 109 | 1 | 0 | -6.180779 | -5.150831 | 0.308305  |
| 110 | 1 | 0 | -6.326754 | -4.730745 | 2.012704  |
| 111 | 6 | 0 | -4.636766 | -1.149037 | -1.754577 |
| 112 | 1 | 0 | -4.348055 | -2.003401 | -2.387468 |
| 113 | 7 | 0 | 5.515698  | 1.254795  | -0.848452 |
| 114 | 7 | 0 | 4.392932  | 3.329132  | 0.839797  |
| 115 | 7 | 0 | 0.521308  | 1.326511  | 5.489422  |
| 116 | 7 | 0 | -0.521308 | -1.326511 | 5.489422  |
| 117 | 6 | 0 | 4.165034  | -1.267446 | -1.279382 |
| 118 | 1 | 0 | 4.860541  | -1.208642 | -0.445702 |
| 119 | 6 | 0 | 3.945040  | -0.118966 | -2.051609 |
| 120 | 6 | 0 | 4.636766  | 1.149037  | -1.754577 |
| 121 | 1 | 0 | 4.348055  | 2.003401  | -2.387468 |
| 122 | 6 | 0 | 6.144059  | 2.549734  | -0.673932 |
| 123 | 1 | 0 | 5.759396  | 3.287758  | -1.401252 |
| 124 | 6 | 0 | 5.818748  | 3.078542  | 0.730717  |
| 125 | 1 | 0 | 6.149808  | 2.312951  | 1.455030  |
| 126 | 6 | 0 | 6.566339  | 4.390070  | 0.999532  |
| 127 | 1 | 0 | 6.326754  | 4.730745  | 2.012704  |
| 128 | 1 | 0 | 6.180779  | 5.150831  | 0.308305  |
| 129 | 6 | 0 | 8.075406  | 4.230138  | 0.815010  |
| 130 | 1 | 0 | 8.577725  | 5.186482  | 0.994880  |
| 131 | 1 | 0 | 8.462040  | 3.522163  | 1.560713  |
| 132 | 6 | 0 | 8.395721  | 3.708585  | -0.586564 |
| 133 | 1 | 0 | 9.474452  | 3.563100  | -0.706734 |
| 134 | 1 | 0 | 8.091060  | 4.458595  | -1.329250 |
| 135 | 6 | 0 | 7.658158  | 2.396782  | -0.855365 |
| 136 | 1 | 0 | 8.007512  | 1.619309  | -0.163582 |
| 137 | 1 | 0 | 7.857036  | 2.032621  | -1.869142 |
| 138 | 6 | 0 | 3.759464  | 2.699566  | 1.739772  |
| 139 | 1 | 0 | 4.249527  | 1.958809  | 2.388860  |
| 140 | 6 | 0 | 2.331547  | 2.942915  | 2.024846  |
| 141 | 6 | 0 | 1.582103  | 3.858749  | 1.272645  |
| 142 | 1 | 0 | 2.071746  | 4.384974  | 0.455323  |
| 143 | 6 | 0 | 0.248684  | 4.102785  | 1.580172  |
| 144 | 6 | 0 | -0.343618 | 3.438130  | 2.664864  |
| 145 | 1 | 0 | -1.380673 | 3.659817  | 2.905517  |
| 146 | 6 | 0 | 0.398623  | 2.549738  | 3.432995  |
| 147 | 6 | 0 | 1.736011  | 2.294193  | 3.097574  |
| 148 | 1 | 0 | 2.300086  | 1.592001  | 3.705427  |
| 149 | 6 | 0 | -0.195784 | 1.925088  | 4.632514  |
| 150 | 1 | 0 | -1.285100 | 2.034441  | 4.750884  |
| 151 | 6 | 0 | -0.126111 | 0.758472  | 6.653211  |
| 152 | 1 | 0 | -1.220093 | 0.911855  | 6.626636  |
| 153 | 6 | 0 | 0.126111  | -0.758472 | 6.653211  |
| 154 | 1 | 0 | 1.220093  | -0.911855 | 6.626636  |
| 155 | 6 | 0 | -0.449730 | -1.399652 | 7.919679  |
| 156 | 1 | 0 | -0.244001 | -2.475334 | 7.897947  |
| 157 | 1 | 0 | -1.540970 | -1.282870 | 7.897343  |
| 158 | 6 | 0 | 0.123581  | -0.754951 | 9.182293  |
| 159 | 1 | 0 | 1.204791  | -0.943440 | 9.229606  |
| 160 | 1 | 0 | -0.317990 | -1.216749 | 10.071614 |
| 161 | 6 | 0 | -0.123581 | 0.754951  | 9.182293  |
| 162 | 1 | 0 | -1.204791 | 0.943440  | 9.229606  |

|     |   |   |           |           |           |
|-----|---|---|-----------|-----------|-----------|
| 163 | 1 | 0 | 0.317990  | 1.216749  | 10.071614 |
| 164 | 6 | 0 | 0.449730  | 1.399652  | 7.919679  |
| 165 | 1 | 0 | 1.540970  | 1.282870  | 7.897343  |
| 166 | 1 | 0 | 0.244001  | 2.475334  | 7.897947  |
| 167 | 6 | 0 | 0.195784  | -1.925088 | 4.632514  |
| 168 | 1 | 0 | 1.285100  | -2.034441 | 4.750884  |
| 169 | 6 | 0 | 1.026366  | 2.340022  | -1.239730 |
| 170 | 6 | 0 | -1.859931 | 0.733215  | 0.757786  |
| 171 | 6 | 0 | 1.859931  | -0.733215 | 0.757786  |
| 172 | 6 | 0 | -1.026366 | -2.340022 | -1.239730 |
| 173 | 8 | 0 | 1.731502  | 1.526686  | -0.800901 |
| 174 | 8 | 0 | -0.975880 | 1.181441  | 0.149747  |
| 175 | 8 | 0 | 0.975880  | -1.181441 | 0.149747  |
| 176 | 8 | 0 | -1.731502 | -1.526686 | -0.800901 |
| 177 | 8 | 0 | 0.347865  | 3.166108  | -1.698487 |
| 178 | 8 | 0 | -2.739319 | 0.306999  | 1.388355  |
| 179 | 8 | 0 | 2.739319  | -0.306999 | 1.388355  |
| 180 | 8 | 0 | -0.347865 | -3.166108 | -1.698487 |

4CO2@CC3-b C1 cc3-rj

Standard orientation:

| Center<br>Number | Atomic<br>Number | Atomic<br>Type | Coordinates (Angstroms) |           |           |
|------------------|------------------|----------------|-------------------------|-----------|-----------|
|                  |                  |                | X                       | Y         | Z         |
| 1                | 7                | 0              | -2.217207               | 2.939697  | 4.574225  |
| 2                | 7                | 0              | -4.511941               | 1.786838  | 3.244424  |
| 3                | 7                | 0              | -3.849988               | -4.221817 | 1.040272  |
| 4                | 7                | 0              | -1.368771               | -5.684831 | 0.762159  |
| 5                | 6                | 0              | 0.453041                | 2.002307  | 4.133935  |
| 6                | 1                | 0              | -0.166938               | 1.465110  | 4.847080  |
| 7                | 6                | 0              | -0.117594               | 3.062497  | 3.414485  |
| 8                | 6                | 0              | -1.519152               | 3.461536  | 3.653693  |
| 9                | 1                | 0              | -1.912138               | 4.253284  | 2.997526  |
| 10               | 6                | 0              | -3.567311               | 3.429848  | 4.767997  |
| 11               | 1                | 0              | -3.836046               | 4.190159  | 4.012600  |
| 12               | 6                | 0              | -4.551641               | 2.259670  | 4.613956  |
| 13               | 1                | 0              | -4.243320               | 1.472238  | 5.325291  |
| 14               | 6                | 0              | -5.980377               | 2.710623  | 4.939806  |
| 15               | 1                | 0              | -6.653034               | 1.852158  | 4.837066  |
| 16               | 1                | 0              | -6.286340               | 3.446975  | 4.185284  |
| 17               | 6                | 0              | -6.075935               | 3.320923  | 6.338149  |
| 18               | 1                | 0              | -7.102239               | 3.648972  | 6.533910  |
| 19               | 1                | 0              | -5.837950               | 2.554871  | 7.088713  |
| 20               | 6                | 0              | -5.099831               | 4.489122  | 6.485480  |
| 21               | 1                | 0              | -5.146268               | 4.905144  | 7.497420  |
| 22               | 1                | 0              | -5.392599               | 5.293323  | 5.796761  |
| 23               | 6                | 0              | -3.672364               | 4.042828  | 6.169129  |
| 24               | 1                | 0              | -3.342550               | 3.289934  | 6.896824  |
| 25               | 1                | 0              | -2.971731               | 4.881935  | 6.240253  |
| 26               | 6                | 0              | -4.202029               | 0.574695  | 3.039579  |
| 27               | 1                | 0              | -3.951355               | -0.112347 | 3.862588  |
| 28               | 6                | 0              | -4.187903               | -0.011881 | 1.684116  |
| 29               | 6                | 0              | -4.412177               | 0.792827  | 0.557582  |
| 30               | 1                | 0              | -4.562182               | 1.859831  | 0.701124  |
| 31               | 6                | 0              | -4.449279               | 0.230484  | -0.712470 |
| 32               | 6                | 0              | -4.250356               | -1.149125 | -0.865045 |
| 33               | 1                | 0              | -4.279906               | -1.569946 | -1.866733 |



|    |   |   |           |           |           |
|----|---|---|-----------|-----------|-----------|
| 34 | 6 | 0 | -4.033535 | -1.955973 | 0.244606  |
| 35 | 6 | 0 | -3.997836 | -1.379029 | 1.522548  |
| 36 | 1 | 0 | -3.833645 | -2.026408 | 2.380210  |
| 37 | 6 | 0 | -3.900646 | -3.415291 | 0.063281  |
| 38 | 1 | 0 | -3.880993 | -3.763389 | -0.981116 |
| 39 | 6 | 0 | -3.799968 | -5.640155 | 0.740626  |
| 40 | 1 | 0 | -3.733563 | -5.822230 | -0.347238 |
| 41 | 6 | 0 | -2.547632 | -6.252739 | 1.386311  |
| 42 | 1 | 0 | -2.585863 | -6.021236 | 2.466132  |
| 43 | 6 | 0 | -2.529527 | -7.772892 | 1.191016  |
| 44 | 1 | 0 | -1.634218 | -8.180148 | 1.673308  |
| 45 | 1 | 0 | -2.434133 | -7.978466 | 0.116874  |
| 46 | 6 | 0 | -3.796890 | -8.427728 | 1.740654  |
| 47 | 1 | 0 | -3.844062 | -8.277358 | 2.827846  |
| 48 | 1 | 0 | -3.763394 | -9.509100 | 1.571023  |
| 49 | 6 | 0 | -5.042946 | -7.819852 | 1.094694  |
| 50 | 1 | 0 | -5.041249 | -8.049830 | 0.020495  |
| 51 | 1 | 0 | -5.950943 | -8.266434 | 1.513460  |
| 52 | 6 | 0 | -5.068195 | -6.303900 | 1.290263  |
| 53 | 1 | 0 | -5.145185 | -6.062313 | 2.358371  |
| 54 | 1 | 0 | -5.940080 | -5.857483 | 0.799790  |
| 55 | 6 | 0 | -0.554645 | -5.054242 | 1.501143  |
| 56 | 1 | 0 | -0.726206 | -4.922708 | 2.580642  |
| 57 | 7 | 0 | 2.374233  | 5.113758  | 0.628146  |
| 58 | 7 | 0 | 2.538321  | 4.566790  | -2.211624 |
| 59 | 7 | 0 | -2.716759 | 1.837555  | -4.699949 |
| 60 | 7 | 0 | -4.761373 | 0.625858  | -3.064485 |
| 61 | 6 | 0 | 0.654564  | 3.757454  | 2.492982  |
| 62 | 1 | 0 | 0.236774  | 4.579592  | 1.917710  |
| 63 | 6 | 0 | 1.999623  | 3.413218  | 2.288905  |
| 64 | 6 | 0 | 2.834740  | 4.160494  | 1.326537  |
| 65 | 1 | 0 | 3.883127  | 3.834318  | 1.251608  |
| 66 | 6 | 0 | 3.297771  | 5.804717  | -0.252080 |
| 67 | 1 | 0 | 4.253851  | 5.258689  | -0.341672 |
| 68 | 6 | 0 | 2.681723  | 5.898556  | -1.653749 |
| 69 | 1 | 0 | 1.702572  | 6.400311  | -1.552477 |
| 70 | 6 | 0 | 3.579998  | 6.723908  | -2.583061 |
| 71 | 1 | 0 | 3.107019  | 6.783092  | -3.569431 |
| 72 | 1 | 0 | 4.526255  | 6.183187  | -2.714913 |
| 73 | 6 | 0 | 3.844904  | 8.118861  | -2.016205 |
| 74 | 1 | 0 | 4.503506  | 8.677533  | -2.689499 |
| 75 | 1 | 0 | 2.899648  | 8.675730  | -1.960742 |
| 76 | 6 | 0 | 4.457446  | 8.027778  | -0.617777 |
| 77 | 1 | 0 | 4.613158  | 9.027798  | -0.199522 |
| 78 | 1 | 0 | 5.445964  | 7.553747  | -0.686725 |
| 79 | 6 | 0 | 3.564365  | 7.206013  | 0.312014  |
| 80 | 1 | 0 | 2.598751  | 7.709668  | 0.451135  |
| 81 | 1 | 0 | 4.016690  | 7.105166  | 1.304752  |
| 82 | 6 | 0 | 1.393288  | 4.229043  | -2.639901 |
| 83 | 1 | 0 | 0.518036  | 4.891396  | -2.556186 |
| 84 | 6 | 0 | 1.150049  | 2.927182  | -3.293366 |
| 85 | 6 | 0 | 2.189601  | 2.002127  | -3.463552 |
| 86 | 1 | 0 | 3.182931  | 2.261834  | -3.106927 |
| 87 | 6 | 0 | 1.943298  | 0.771054  | -4.061131 |
| 88 | 6 | 0 | 0.651247  | 0.463941  | -4.509897 |
| 89 | 1 | 0 | 0.474901  | -0.504253 | -4.971475 |
| 90 | 6 | 0 | -0.383519 | 1.378624  | -4.350683 |
| 91 | 6 | 0 | -0.127678 | 2.616018  | -3.744354 |
| 92 | 1 | 0 | -0.948590 | 3.318507  | -3.625771 |

|     |   |   |           |           |           |
|-----|---|---|-----------|-----------|-----------|
| 93  | 6 | 0 | -1.743549 | 1.031775  | -4.809860 |
| 94  | 1 | 0 | -1.857300 | 0.032255  | -5.256609 |
| 95  | 6 | 0 | -4.000467 | 1.421796  | -5.232234 |
| 96  | 1 | 0 | -3.980147 | 0.364986  | -5.553827 |
| 97  | 6 | 0 | -5.068556 | 1.550935  | -4.138174 |
| 98  | 1 | 0 | -5.059431 | 2.597546  | -3.784417 |
| 99  | 6 | 0 | -6.455610 | 1.218428  | -4.700924 |
| 100 | 1 | 0 | -7.196514 | 1.331333  | -3.901894 |
| 101 | 1 | 0 | -6.462544 | 0.160849  | -4.995538 |
| 102 | 6 | 0 | -6.801599 | 2.101790  | -5.900027 |
| 103 | 1 | 0 | -6.866931 | 3.148886  | -5.574435 |
| 104 | 1 | 0 | -7.786610 | 1.829618  | -6.293590 |
| 105 | 6 | 0 | -5.735063 | 1.979920  | -6.989635 |
| 106 | 1 | 0 | -5.735229 | 0.953798  | -7.381746 |
| 107 | 1 | 0 | -5.967157 | 2.641337  | -7.830980 |
| 108 | 6 | 0 | -4.349945 | 2.309951  | -6.432294 |
| 109 | 1 | 0 | -4.313100 | 3.357706  | -6.106642 |
| 110 | 1 | 0 | -3.577451 | 2.187432  | -7.199359 |
| 111 | 6 | 0 | -4.710766 | 1.089884  | -1.885267 |
| 112 | 1 | 0 | -4.860775 | 2.158763  | -1.669864 |
| 113 | 7 | 0 | 3.534871  | 0.097071  | 4.483371  |
| 114 | 7 | 0 | 3.551198  | -2.649687 | 3.564515  |
| 115 | 7 | 0 | 3.503582  | -3.459611 | -2.814713 |
| 116 | 7 | 0 | 2.861787  | -1.357395 | -4.701090 |
| 117 | 6 | 0 | 2.553707  | 2.356572  | 3.000006  |
| 118 | 1 | 0 | 3.586268  | 2.054952  | 2.842496  |
| 119 | 6 | 0 | 1.780094  | 1.646615  | 3.930947  |
| 120 | 6 | 0 | 2.352589  | 0.510996  | 4.682093  |
| 121 | 1 | 0 | 1.682659  | 0.038341  | 5.417042  |
| 122 | 6 | 0 | 4.009793  | -1.001705 | 5.302675  |
| 123 | 1 | 0 | 3.186667  | -1.458552 | 5.880963  |
| 124 | 6 | 0 | 4.600463  | -2.089696 | 4.396675  |
| 125 | 1 | 0 | 5.391761  | -1.620484 | 3.785077  |
| 126 | 6 | 0 | 5.213259  | -3.215562 | 5.239289  |
| 127 | 1 | 0 | 5.637897  | -3.968052 | 4.565777  |
| 128 | 1 | 0 | 4.404826  | -3.706468 | 5.796754  |
| 129 | 6 | 0 | 6.271721  | -2.683338 | 6.205719  |
| 130 | 1 | 0 | 6.676163  | -3.504502 | 6.806797  |
| 131 | 1 | 0 | 7.110444  | -2.264483 | 5.633224  |
| 132 | 6 | 0 | 5.685194  | -1.595513 | 7.106739  |
| 133 | 1 | 0 | 6.454473  | -1.191011 | 7.772892  |
| 134 | 1 | 0 | 4.909067  | -2.036410 | 7.746965  |
| 135 | 6 | 0 | 5.074381  | -0.470801 | 6.270424  |
| 136 | 1 | 0 | 5.854591  | 0.029692  | 5.682148  |
| 137 | 1 | 0 | 4.618818  | 0.292903  | 6.910319  |
| 138 | 6 | 0 | 3.762362  | -2.712269 | 2.315123  |
| 139 | 1 | 0 | 4.680762  | -2.315286 | 1.856397  |
| 140 | 6 | 0 | 2.795052  | -3.327083 | 1.382808  |
| 141 | 6 | 0 | 1.598690  | -3.884447 | 1.857039  |
| 142 | 1 | 0 | 1.395177  | -3.848246 | 2.924212  |
| 143 | 6 | 0 | 0.692708  | -4.464037 | 0.976518  |
| 144 | 6 | 0 | 0.987314  | -4.499872 | -0.393619 |
| 145 | 1 | 0 | 0.269637  | -4.958342 | -1.069352 |
| 146 | 6 | 0 | 2.174059  | -3.955690 | -0.872288 |
| 147 | 6 | 0 | 3.073651  | -3.358477 | 0.021903  |
| 148 | 1 | 0 | 3.986460  | -2.920907 | -0.373698 |
| 149 | 6 | 0 | 2.469776  | -4.002444 | -2.319499 |
| 150 | 1 | 0 | 1.729423  | -4.528079 | -2.941471 |
| 151 | 6 | 0 | 3.714187  | -3.596835 | -4.243775 |

|     |   |   |           |           |           |
|-----|---|---|-----------|-----------|-----------|
| 152 | 1 | 0 | 2.812249  | -3.988214 | -4.747509 |
| 153 | 6 | 0 | 4.021233  | -2.218858 | -4.844168 |
| 154 | 1 | 0 | 4.895368  | -1.808882 | -4.307333 |
| 155 | 6 | 0 | 4.357378  | -2.345258 | -6.335350 |
| 156 | 1 | 0 | 4.584235  | -1.349096 | -6.730864 |
| 157 | 1 | 0 | 3.461378  | -2.700751 | -6.860800 |
| 158 | 6 | 0 | 5.522215  | -3.307450 | -6.569775 |
| 159 | 1 | 0 | 6.430377  | -2.900566 | -6.104616 |
| 160 | 1 | 0 | 5.726039  | -3.393703 | -7.642255 |
| 161 | 6 | 0 | 5.220868  | -4.680752 | -5.967684 |
| 162 | 1 | 0 | 4.369592  | -5.128615 | -6.498121 |
| 163 | 1 | 0 | 6.071728  | -5.356336 | -6.104869 |
| 164 | 6 | 0 | 4.884878  | -4.558875 | -4.481188 |
| 165 | 1 | 0 | 5.755185  | -4.184980 | -3.926053 |
| 166 | 1 | 0 | 4.630132  | -5.535000 | -4.053900 |
| 167 | 6 | 0 | 3.041869  | -0.207223 | -4.197188 |
| 168 | 1 | 0 | 4.025273  | 0.124713  | -3.830602 |
| 169 | 8 | 0 | -2.017180 | 2.346616  | -1.239525 |
| 170 | 8 | 0 | 0.453552  | -1.132493 | 2.838409  |
| 171 | 8 | 0 | 3.083658  | 1.718798  | -0.465551 |
| 172 | 8 | 0 | 0.180760  | -2.127488 | -2.740846 |
| 173 | 6 | 0 | -1.651123 | 1.259500  | -1.430201 |
| 174 | 6 | 0 | 1.926534  | 1.785858  | -0.382950 |
| 175 | 6 | 0 | 1.271459  | -0.716798 | 2.123154  |
| 176 | 6 | 0 | 0.866905  | -1.451185 | -2.089196 |
| 177 | 8 | 0 | 1.564032  | -0.791531 | -1.431344 |
| 178 | 8 | 0 | -1.304945 | 0.165519  | -1.623325 |
| 179 | 8 | 0 | 0.768893  | 1.876620  | -0.294027 |
| 180 | 8 | 0 | 2.090015  | -0.297159 | 1.411327  |

6CO2@CC3-a T cc3-rjjj

Standard orientation:

| Center<br>Number | Atomic<br>Number | Atomic<br>Type | Coordinates (Angstroms) |           |           |
|------------------|------------------|----------------|-------------------------|-----------|-----------|
|                  |                  |                | X                       | Y         | Z         |
| 1                | 7                | 0              | 5.580176                | 0.927034  | -1.138603 |
| 2                | 7                | 0              | 5.580176                | -0.927034 | 1.138603  |
| 3                | 7                | 0              | 1.138603                | -5.580176 | 0.927034  |
| 4                | 7                | 0              | -1.138603               | -5.580176 | -0.927034 |
| 5                | 6                | 0              | 3.409767                | 1.516403  | -2.937340 |
| 6                | 1                | 0              | 4.028354                | 0.648941  | -3.153180 |
| 7                | 6                | 0              | 3.730613                | 2.309253  | -1.825649 |
| 8                | 6                | 0              | 4.888131                | 1.976797  | -0.966410 |
| 9                | 1                | 0              | 5.096078                | 2.688107  | -0.152457 |
| 10               | 6                | 0              | 6.722618                | 0.720828  | -0.264865 |
| 11               | 1                | 0              | 6.688881                | 1.397439  | 0.607536  |
| 12               | 6                | 0              | 6.722618                | -0.720828 | 0.264865  |
| 13               | 1                | 0              | 6.688881                | -1.397439 | -0.607536 |
| 14               | 6                | 0              | 7.998158                | -0.998050 | 1.072626  |
| 15               | 1                | 0              | 7.973563                | -2.037547 | 1.417921  |
| 16               | 1                | 0              | 7.980033                | -0.364416 | 1.969114  |
| 17               | 6                | 0              | 9.261227                | -0.719320 | 0.258642  |
| 18               | 1                | 0              | 10.149586               | -0.909951 | 0.869982  |
| 19               | 1                | 0              | 9.306491                | -1.410071 | -0.594265 |
| 20               | 6                | 0              | 9.261227                | 0.719320  | -0.258642 |
| 21               | 1                | 0              | 10.149586               | 0.909951  | -0.869982 |
| 22               | 1                | 0              | 9.306491                | 1.410071  | 0.594265  |

|    |   |   |           |            |           |
|----|---|---|-----------|------------|-----------|
| 23 | 6 | 0 | 7.998158  | 0.998050   | -1.072626 |
| 24 | 1 | 0 | 7.980033  | 0.364416   | -1.969114 |
| 25 | 1 | 0 | 7.973563  | 2.037547   | -1.417921 |
| 26 | 6 | 0 | 4.888131  | -1.976797  | 0.966410  |
| 27 | 1 | 0 | 5.096078  | -2.688107  | 0.152457  |
| 28 | 6 | 0 | 3.730613  | -2.309253  | 1.825649  |
| 29 | 6 | 0 | 3.409767  | -1.516403  | 2.937340  |
| 30 | 1 | 0 | 4.028354  | -0.648941  | 3.153180  |
| 31 | 6 | 0 | 2.309253  | -1.825649  | 3.730613  |
| 32 | 6 | 0 | 1.516403  | -2.937340  | 3.409767  |
| 33 | 1 | 0 | 0.648941  | -3.153180  | 4.028354  |
| 34 | 6 | 0 | 1.825649  | -3.730613  | 2.309253  |
| 35 | 6 | 0 | 2.937340  | -3.409767  | 1.516403  |
| 36 | 1 | 0 | 3.153180  | -4.028354  | 0.648941  |
| 37 | 6 | 0 | 0.966410  | -4.888131  | 1.976797  |
| 38 | 1 | 0 | 0.152457  | -5.096078  | 2.688107  |
| 39 | 6 | 0 | 0.264865  | -6.722618  | 0.720828  |
| 40 | 1 | 0 | -0.607536 | -6.688881  | 1.397439  |
| 41 | 6 | 0 | -0.264865 | -6.722618  | -0.720828 |
| 42 | 1 | 0 | 0.607536  | -6.688881  | -1.397439 |
| 43 | 6 | 0 | -1.072626 | -7.998158  | -0.998050 |
| 44 | 1 | 0 | -1.417921 | -7.973563  | -2.037547 |
| 45 | 1 | 0 | -1.969114 | -7.980033  | -0.364416 |
| 46 | 6 | 0 | -0.258642 | -9.261227  | -0.719320 |
| 47 | 1 | 0 | 0.594265  | -9.306491  | -1.410071 |
| 48 | 1 | 0 | -0.869982 | -10.149586 | -0.909951 |
| 49 | 6 | 0 | 0.258642  | -9.261227  | 0.719320  |
| 50 | 1 | 0 | -0.594265 | -9.306491  | 1.410071  |
| 51 | 1 | 0 | 0.869982  | -10.149586 | 0.909951  |
| 52 | 6 | 0 | 1.072626  | -7.998158  | 0.998050  |
| 53 | 1 | 0 | 1.969114  | -7.980033  | 0.364416  |
| 54 | 1 | 0 | 1.417921  | -7.973563  | 2.037547  |
| 55 | 6 | 0 | -0.966410 | -4.888131  | -1.976797 |
| 56 | 1 | 0 | -0.152457 | -5.096078  | -2.688107 |
| 57 | 7 | 0 | 1.138603  | 5.580176   | -0.927034 |
| 58 | 7 | 0 | -1.138603 | 5.580176   | 0.927034  |
| 59 | 7 | 0 | -0.927034 | 1.138603   | 5.580176  |
| 60 | 7 | 0 | 0.927034  | -1.138603  | 5.580176  |
| 61 | 6 | 0 | 2.937340  | 3.409767   | -1.516403 |
| 62 | 1 | 0 | 3.153180  | 4.028354   | -0.648941 |
| 63 | 6 | 0 | 1.825649  | 3.730613   | -2.309253 |
| 64 | 6 | 0 | 0.966410  | 4.888131   | -1.976797 |
| 65 | 1 | 0 | 0.152457  | 5.096078   | -2.688107 |
| 66 | 6 | 0 | 0.264865  | 6.722618   | -0.720828 |
| 67 | 1 | 0 | -0.607536 | 6.688881   | -1.397439 |
| 68 | 6 | 0 | -0.264865 | 6.722618   | 0.720828  |
| 69 | 1 | 0 | 0.607536  | 6.688881   | 1.397439  |
| 70 | 6 | 0 | -1.072626 | 7.998158   | 0.998050  |
| 71 | 1 | 0 | -1.417921 | 7.973563   | 2.037547  |
| 72 | 1 | 0 | -1.969114 | 7.980033   | 0.364416  |
| 73 | 6 | 0 | -0.258642 | 9.261227   | 0.719320  |
| 74 | 1 | 0 | -0.869982 | 10.149586  | 0.909951  |
| 75 | 1 | 0 | 0.594265  | 9.306491   | 1.410071  |
| 76 | 6 | 0 | 0.258642  | 9.261227   | -0.719320 |
| 77 | 1 | 0 | 0.869982  | 10.149586  | -0.909951 |
| 78 | 1 | 0 | -0.594265 | 9.306491   | -1.410071 |
| 79 | 6 | 0 | 1.072626  | 7.998158   | -0.998050 |
| 80 | 1 | 0 | 1.969114  | 7.980033   | -0.364416 |
| 81 | 1 | 0 | 1.417921  | 7.973563   | -2.037547 |

|     |   |   |           |           |            |
|-----|---|---|-----------|-----------|------------|
| 82  | 6 | 0 | -0.966410 | 4.888131  | 1.976797   |
| 83  | 1 | 0 | -0.152457 | 5.096078  | 2.688107   |
| 84  | 6 | 0 | -1.825649 | 3.730613  | 2.309253   |
| 85  | 6 | 0 | -2.937340 | 3.409767  | 1.516403   |
| 86  | 1 | 0 | -3.153180 | 4.028354  | 0.648941   |
| 87  | 6 | 0 | -3.730613 | 2.309253  | 1.825649   |
| 88  | 6 | 0 | -3.409767 | 1.516403  | 2.937340   |
| 89  | 1 | 0 | -4.028354 | 0.648941  | 3.153180   |
| 90  | 6 | 0 | -2.309253 | 1.825649  | 3.730613   |
| 91  | 6 | 0 | -1.516403 | 2.937340  | 3.409767   |
| 92  | 1 | 0 | -0.648941 | 3.153180  | 4.028354   |
| 93  | 6 | 0 | -1.976797 | 0.966410  | 4.888131   |
| 94  | 1 | 0 | -2.688107 | 0.152457  | 5.096078   |
| 95  | 6 | 0 | -0.720828 | 0.264865  | 6.722618   |
| 96  | 1 | 0 | -1.397439 | -0.607536 | 6.688881   |
| 97  | 6 | 0 | 0.720828  | -0.264865 | 6.722618   |
| 98  | 1 | 0 | 1.397439  | 0.607536  | 6.688881   |
| 99  | 6 | 0 | 0.998050  | -1.072626 | 7.998158   |
| 100 | 1 | 0 | 2.037547  | -1.417921 | 7.973563   |
| 101 | 1 | 0 | 0.364416  | -1.969114 | 7.980033   |
| 102 | 6 | 0 | 0.719320  | -0.258642 | 9.261227   |
| 103 | 1 | 0 | 1.410071  | 0.594265  | 9.306491   |
| 104 | 1 | 0 | 0.909951  | -0.869982 | 10.149586  |
| 105 | 6 | 0 | -0.719320 | 0.258642  | 9.261227   |
| 106 | 1 | 0 | -1.410071 | -0.594265 | 9.306491   |
| 107 | 1 | 0 | -0.909951 | 0.869982  | 10.149586  |
| 108 | 6 | 0 | -0.998050 | 1.072626  | 7.998158   |
| 109 | 1 | 0 | -0.364416 | 1.969114  | 7.980033   |
| 110 | 1 | 0 | -2.037547 | 1.417921  | 7.973563   |
| 111 | 6 | 0 | 1.976797  | -0.966410 | 4.888131   |
| 112 | 1 | 0 | 2.688107  | -0.152457 | 5.096078   |
| 113 | 7 | 0 | 0.927034  | 1.138603  | -5.580176  |
| 114 | 7 | 0 | -0.927034 | -1.138603 | -5.580176  |
| 115 | 7 | 0 | -5.580176 | -0.927034 | -1.138603  |
| 116 | 7 | 0 | -5.580176 | 0.927034  | 1.138603   |
| 117 | 6 | 0 | 1.516403  | 2.937340  | -3.409767  |
| 118 | 1 | 0 | 0.648941  | 3.153180  | -4.028354  |
| 119 | 6 | 0 | 2.309253  | 1.825649  | -3.730613  |
| 120 | 6 | 0 | 1.976797  | 0.966410  | -4.888131  |
| 121 | 1 | 0 | 2.688107  | 0.152457  | -5.096078  |
| 122 | 6 | 0 | 0.720828  | 0.264865  | -6.722618  |
| 123 | 1 | 0 | 1.397439  | -0.607536 | -6.688881  |
| 124 | 6 | 0 | -0.720828 | -0.264865 | -6.722618  |
| 125 | 1 | 0 | -1.397439 | 0.607536  | -6.688881  |
| 126 | 6 | 0 | -0.998050 | -1.072626 | -7.998158  |
| 127 | 1 | 0 | -2.037547 | -1.417921 | -7.973563  |
| 128 | 1 | 0 | -0.364416 | -1.969114 | -7.980033  |
| 129 | 6 | 0 | -0.719320 | -0.258642 | -9.261227  |
| 130 | 1 | 0 | -0.909951 | -0.869982 | -10.149586 |
| 131 | 1 | 0 | -1.410071 | 0.594265  | -9.306491  |
| 132 | 6 | 0 | 0.719320  | 0.258642  | -9.261227  |
| 133 | 1 | 0 | 0.909951  | 0.869982  | -10.149586 |
| 134 | 1 | 0 | 1.410071  | -0.594265 | -9.306491  |
| 135 | 6 | 0 | 0.998050  | 1.072626  | -7.998158  |
| 136 | 1 | 0 | 0.364416  | 1.969114  | -7.980033  |
| 137 | 1 | 0 | 2.037547  | 1.417921  | -7.973563  |
| 138 | 6 | 0 | -1.976797 | -0.966410 | -4.888131  |
| 139 | 1 | 0 | -2.688107 | -0.152457 | -5.096078  |
| 140 | 6 | 0 | -2.309253 | -1.825649 | -3.730613  |

|     |   |   |            |           |           |
|-----|---|---|------------|-----------|-----------|
| 141 | 6 | 0 | -1.516403  | -2.937340 | -3.409767 |
| 142 | 1 | 0 | -0.648941  | -3.153180 | -4.028354 |
| 143 | 6 | 0 | -1.825649  | -3.730613 | -2.309253 |
| 144 | 6 | 0 | -2.937340  | -3.409767 | -1.516403 |
| 145 | 1 | 0 | -3.153180  | -4.028354 | -0.648941 |
| 146 | 6 | 0 | -3.730613  | -2.309253 | -1.825649 |
| 147 | 6 | 0 | -3.409767  | -1.516403 | -2.937340 |
| 148 | 1 | 0 | -4.028354  | -0.648941 | -3.153180 |
| 149 | 6 | 0 | -4.888131  | -1.976797 | -0.966410 |
| 150 | 1 | 0 | -5.096078  | -2.688107 | -0.152457 |
| 151 | 6 | 0 | -6.722618  | -0.720828 | -0.264865 |
| 152 | 1 | 0 | -6.688881  | -1.397439 | 0.607536  |
| 153 | 6 | 0 | -6.722618  | 0.720828  | 0.264865  |
| 154 | 1 | 0 | -6.688881  | 1.397439  | -0.607536 |
| 155 | 6 | 0 | -7.998158  | 0.998050  | 1.072626  |
| 156 | 1 | 0 | -7.973563  | 2.037547  | 1.417921  |
| 157 | 1 | 0 | -7.980033  | 0.364416  | 1.969114  |
| 158 | 6 | 0 | -9.261227  | 0.719320  | 0.258642  |
| 159 | 1 | 0 | -9.306491  | 1.410071  | -0.594265 |
| 160 | 1 | 0 | -10.149586 | 0.909951  | 0.869982  |
| 161 | 6 | 0 | -9.261227  | -0.719320 | -0.258642 |
| 162 | 1 | 0 | -9.306491  | -1.410071 | 0.594265  |
| 163 | 1 | 0 | -10.149586 | -0.909951 | -0.869982 |
| 164 | 6 | 0 | -7.998158  | -0.998050 | -1.072626 |
| 165 | 1 | 0 | -7.980033  | -0.364416 | -1.969114 |
| 166 | 1 | 0 | -7.973563  | -2.037547 | -1.417921 |
| 167 | 6 | 0 | -4.888131  | 1.976797  | 0.966410  |
| 168 | 1 | 0 | -5.096078  | 2.688107  | 0.152457  |
| 169 | 8 | 0 | 0.777210   | 0.865306  | 2.883686  |
| 170 | 8 | 0 | 0.777210   | -0.865306 | -2.883686 |
| 171 | 8 | 0 | -0.865306  | 2.883686  | -0.777210 |
| 172 | 8 | 0 | -2.883686  | -0.777210 | 0.865306  |
| 173 | 6 | 0 | 0.000000   | 0.000000  | 2.891143  |
| 174 | 6 | 0 | 0.000000   | 2.891143  | -0.000000 |
| 175 | 6 | 0 | -0.000000  | -0.000000 | -2.891143 |
| 176 | 6 | 0 | -2.891143  | 0.000000  | -0.000000 |
| 177 | 8 | 0 | -2.883686  | 0.777210  | -0.865306 |
| 178 | 8 | 0 | -0.777210  | -0.865306 | 2.883686  |
| 179 | 8 | 0 | 0.865306   | 2.883686  | 0.777210  |
| 180 | 8 | 0 | -0.777210  | 0.865306  | -2.883686 |
| 181 | 6 | 0 | -0.000000  | -2.891143 | 0.000000  |
| 182 | 6 | 0 | 2.891143   | -0.000000 | 0.000000  |
| 183 | 8 | 0 | 2.883686   | 0.777210  | 0.865306  |
| 184 | 8 | 0 | 2.883686   | -0.777210 | -0.865306 |
| 185 | 8 | 0 | -0.865306  | -2.883686 | 0.777210  |
| 186 | 8 | 0 | 0.865306   | -2.883686 | -0.777210 |

6CO2@CC3-b C3 cc3-rtt

Standard orientation:

| Center<br>Number | Atomic<br>Number | Atomic<br>Type | Coordinates (Angstroms) |           |           |
|------------------|------------------|----------------|-------------------------|-----------|-----------|
|                  |                  |                | X                       | Y         | Z         |
| 1                | 7                | 0              | -4.606572               | 0.953823  | -3.329434 |
| 2                | 7                | 0              | -3.298069               | 3.550327  | -3.077522 |
| 3                | 7                | 0              | 3.129321                | 3.512497  | -3.329434 |
| 4                | 7                | 0              | 4.723708                | 1.081048  | -3.077522 |
| 5                | 6                | 0              | -3.452426               | -1.616314 | -2.765879 |

|    |   |   |           |           |           |
|----|---|---|-----------|-----------|-----------|
| 6  | 1 | 0 | -3.300371 | -1.193748 | -3.755731 |
| 7  | 6 | 0 | -4.233964 | -0.903722 | -1.844768 |
| 8  | 6 | 0 | -4.835038 | 0.396814  | -2.212498 |
| 9  | 1 | 0 | -5.474300 | 0.860848  | -1.445802 |
| 10 | 6 | 0 | -5.274403 | 2.213457  | -3.605195 |
| 11 | 1 | 0 | -5.733239 | 2.633502  | -2.692388 |
| 12 | 6 | 0 | -4.254315 | 3.236391  | -4.124810 |
| 13 | 1 | 0 | -3.755137 | 2.793850  | -5.005160 |
| 14 | 6 | 0 | -4.959445 | 4.534004  | -4.541833 |
| 15 | 1 | 0 | -4.207576 | 5.234358  | -4.922088 |
| 16 | 1 | 0 | -5.395383 | 4.991400  | -3.643933 |
| 17 | 6 | 0 | -6.048408 | 4.278640  | -5.583676 |
| 18 | 1 | 0 | -6.544236 | 5.219591  | -5.844422 |
| 19 | 1 | 0 | -5.589517 | 3.894161  | -6.504668 |
| 20 | 6 | 0 | -7.064394 | 3.260417  | -5.064899 |
| 21 | 1 | 0 | -7.823559 | 3.051187  | -5.825881 |
| 22 | 1 | 0 | -7.589973 | 3.683662  | -4.198156 |
| 23 | 6 | 0 | -6.367287 | 1.963932  | -4.652910 |
| 24 | 1 | 0 | -5.902287 | 1.490665  | -5.527700 |
| 25 | 1 | 0 | -7.085147 | 1.243364  | -4.245776 |
| 26 | 6 | 0 | -2.067032 | 3.553797  | -3.385327 |
| 27 | 1 | 0 | -1.713481 | 3.278359  | -4.390692 |
| 28 | 6 | 0 | -1.013494 | 3.902578  | -2.407722 |
| 29 | 6 | 0 | -1.351522 | 4.316939  | -1.112344 |
| 30 | 1 | 0 | -2.402954 | 4.374699  | -0.843163 |
| 31 | 6 | 0 | -0.360281 | 4.631492  | -0.189762 |
| 32 | 6 | 0 | 0.987816  | 4.538545  | -0.563767 |
| 33 | 1 | 0 | 1.752330  | 4.787362  | 0.168950  |
| 34 | 6 | 0 | 1.334336  | 4.118582  | -1.844768 |
| 35 | 6 | 0 | 0.326444  | 3.798046  | -2.765879 |
| 36 | 1 | 0 | 0.616369  | 3.455079  | -3.755731 |
| 37 | 6 | 0 | 2.761170  | 3.988858  | -2.212498 |
| 38 | 1 | 0 | 3.482666  | 4.310459  | -1.445802 |
| 39 | 6 | 0 | 4.554111  | 3.461039  | -3.605195 |
| 40 | 1 | 0 | 5.147299  | 3.648380  | -2.692388 |
| 41 | 6 | 0 | 4.929954  | 2.066149  | -4.124810 |
| 42 | 1 | 0 | 4.297114  | 1.855119  | -5.005160 |
| 43 | 6 | 0 | 6.406285  | 2.028003  | -4.541833 |
| 44 | 1 | 0 | 6.636875  | 1.026689  | -4.922088 |
| 45 | 1 | 0 | 7.020370  | 2.176839  | -3.643933 |
| 46 | 6 | 0 | 6.729615  | 3.098755  | -5.583676 |
| 47 | 1 | 0 | 6.167201  | 2.893583  | -6.504668 |
| 48 | 1 | 0 | 7.792416  | 3.057679  | -5.844422 |
| 49 | 6 | 0 | 6.355801  | 4.487736  | -5.064899 |
| 50 | 1 | 0 | 6.985132  | 4.731278  | -4.198156 |
| 51 | 1 | 0 | 6.554186  | 5.249808  | -5.825881 |
| 52 | 6 | 0 | 4.884459  | 4.532266  | -4.652910 |
| 53 | 1 | 0 | 4.242098  | 4.366198  | -5.527700 |
| 54 | 1 | 0 | 4.619358  | 5.514235  | -4.245776 |
| 55 | 6 | 0 | 4.111194  | 0.013204  | -3.385327 |
| 56 | 1 | 0 | 3.695883  | -0.155261 | -4.390692 |
| 57 | 7 | 0 | -4.702757 | -2.603682 | 2.058059  |
| 58 | 7 | 0 | -3.082533 | -2.075943 | 4.413407  |
| 59 | 7 | 0 | -0.256553 | 3.707523  | 4.413407  |
| 60 | 7 | 0 | 0.096524  | 5.374548  | 2.058059  |
| 61 | 6 | 0 | -4.424403 | -1.413799 | -0.563767 |
| 62 | 1 | 0 | -5.022142 | -0.876118 | 0.168950  |
| 63 | 6 | 0 | -3.830849 | -2.627759 | -0.189762 |
| 64 | 6 | 0 | -4.010490 | -3.183131 | 1.166823  |

|     |   |   |           |           |           |
|-----|---|---|-----------|-----------|-----------|
| 65  | 1 | 0 | -3.514439 | -4.148584 | 1.350643  |
| 66  | 6 | 0 | -4.881173 | -3.300625 | 3.319857  |
| 67  | 1 | 0 | -4.234260 | -4.194338 | 3.379152  |
| 68  | 6 | 0 | -4.500011 | -2.378923 | 4.485185  |
| 69  | 1 | 0 | -5.111728 | -1.462901 | 4.401624  |
| 70  | 6 | 0 | -4.790708 | -3.062158 | 5.827232  |
| 71  | 1 | 0 | -4.521348 | -2.374704 | 6.636678  |
| 72  | 1 | 0 | -4.131341 | -3.935371 | 5.917922  |
| 73  | 6 | 0 | -6.253171 | -3.493368 | 5.936865  |
| 74  | 1 | 0 | -6.424900 | -3.995074 | 6.895020  |
| 75  | 1 | 0 | -6.897719 | -2.603967 | 5.922812  |
| 76  | 6 | 0 | -6.635349 | -4.409735 | 4.773600  |
| 77  | 1 | 0 | -7.692806 | -4.688044 | 4.833619  |
| 78  | 1 | 0 | -6.056454 | -5.340789 | 4.842220  |
| 79  | 6 | 0 | -6.349066 | -3.731706 | 3.433580  |
| 80  | 1 | 0 | -6.978674 | -2.839704 | 3.318875  |
| 81  | 1 | 0 | -6.585988 | -4.398217 | 2.596987  |
| 82  | 6 | 0 | -2.745958 | -0.856286 | 4.493675  |
| 83  | 1 | 0 | -3.488236 | -0.049109 | 4.578666  |
| 84  | 6 | 0 | -1.333614 | -0.422680 | 4.465723  |
| 85  | 6 | 0 | -0.293376 | -1.362238 | 4.460925  |
| 86  | 1 | 0 | -0.545392 | -2.419821 | 4.459207  |
| 87  | 6 | 0 | 1.032859  | -0.943604 | 4.465723  |
| 88  | 6 | 0 | 1.326421  | 0.427048  | 4.460925  |
| 89  | 1 | 0 | 2.368322  | 0.737587  | 4.459207  |
| 90  | 6 | 0 | 0.300756  | 1.366284  | 4.465723  |
| 91  | 6 | 0 | -1.033044 | 0.935190  | 4.460925  |
| 92  | 1 | 0 | -1.822930 | 1.682233  | 4.459207  |
| 93  | 6 | 0 | 0.631414  | 2.806212  | 4.493675  |
| 94  | 1 | 0 | 1.701588  | 3.045456  | 4.578666  |
| 95  | 6 | 0 | 0.189798  | 5.086585  | 4.485185  |
| 96  | 1 | 0 | 1.288955  | 5.158337  | 4.401624  |
| 97  | 6 | 0 | -0.417838 | 5.877532  | 3.319857  |
| 98  | 1 | 0 | -1.515274 | 5.764145  | 3.379152  |
| 99  | 6 | 0 | -0.057219 | 7.364305  | 3.433580  |
| 100 | 1 | 0 | -0.515974 | 7.902741  | 2.596987  |
| 101 | 1 | 0 | 1.030082  | 7.463561  | 3.318875  |
| 102 | 6 | 0 | -0.501268 | 7.951248  | 4.773600  |
| 103 | 1 | 0 | -1.597031 | 7.915438  | 4.842220  |
| 104 | 1 | 0 | -0.213563 | 9.006188  | 4.833619  |
| 105 | 6 | 0 | 0.101240  | 7.162089  | 5.936865  |
| 106 | 1 | 0 | 1.193758  | 7.275583  | 5.922812  |
| 107 | 1 | 0 | -0.247386 | 7.561664  | 6.895020  |
| 108 | 6 | 0 | -0.256553 | 5.679954  | 5.827232  |
| 109 | 1 | 0 | -1.342461 | 5.545532  | 5.917922  |
| 110 | 1 | 0 | 0.204120  | 5.102954  | 6.636678  |
| 111 | 6 | 0 | -0.751427 | 5.064752  | 1.166823  |
| 112 | 1 | 0 | -1.835560 | 5.117885  | 1.350643  |
| 113 | 7 | 0 | -1.425639 | -4.631375 | -3.077522 |
| 114 | 7 | 0 | 1.477251  | -4.466320 | -3.329434 |
| 115 | 7 | 0 | 4.606233  | -2.770866 | 2.058059  |
| 116 | 7 | 0 | 3.339086  | -1.631580 | 4.413407  |
| 117 | 6 | 0 | -3.062818 | -3.328922 | -1.112344 |
| 118 | 1 | 0 | -2.587123 | -4.268368 | -0.843163 |
| 119 | 6 | 0 | -2.872985 | -2.829000 | -2.407722 |
| 120 | 6 | 0 | -2.044162 | -3.567000 | -3.385327 |
| 121 | 1 | 0 | -1.982402 | -3.123098 | -4.390692 |
| 122 | 6 | 0 | -0.675639 | -5.302540 | -4.124810 |
| 123 | 1 | 0 | -0.541976 | -4.648969 | -5.005160 |



|     |   |   |           |           |           |
|-----|---|---|-----------|-----------|-----------|
| 124 | 6 | 0 | 0.720292  | -5.674495 | -3.605195 |
| 125 | 1 | 0 | 0.585940  | -6.281882 | -2.692388 |
| 126 | 6 | 0 | 1.482828  | -6.496198 | -4.652910 |
| 127 | 1 | 0 | 2.465789  | -6.757599 | -4.245776 |
| 128 | 1 | 0 | 1.660190  | -5.856864 | -5.527700 |
| 129 | 6 | 0 | 0.708593  | -7.748153 | -5.064899 |
| 130 | 1 | 0 | 1.269374  | -8.300995 | -5.825881 |
| 131 | 1 | 0 | 0.604841  | -8.414941 | -4.198156 |
| 132 | 6 | 0 | -0.681206 | -7.377395 | -5.583676 |
| 133 | 1 | 0 | -1.248180 | -8.277270 | -5.844422 |
| 134 | 1 | 0 | -0.577684 | -6.787744 | -6.504668 |
| 135 | 6 | 0 | -1.446840 | -6.562007 | -4.541833 |
| 136 | 1 | 0 | -1.624988 | -7.168238 | -3.643933 |
| 137 | 1 | 0 | -2.429299 | -6.261047 | -4.922088 |
| 138 | 6 | 0 | 2.073868  | -4.385672 | -2.212498 |
| 139 | 1 | 0 | 1.991634  | -5.171306 | -1.445802 |
| 140 | 6 | 0 | 2.899628  | -3.214860 | -1.844768 |
| 141 | 6 | 0 | 3.125982  | -2.181732 | -2.765879 |
| 142 | 1 | 0 | 2.684002  | -2.261331 | -3.755731 |
| 143 | 6 | 0 | 3.886479  | -1.073578 | -2.407722 |
| 144 | 6 | 0 | 4.414340  | -0.988017 | -1.112344 |
| 145 | 1 | 0 | 4.990077  | -0.106331 | -0.843163 |
| 146 | 6 | 0 | 4.191131  | -2.003734 | -0.189762 |
| 147 | 6 | 0 | 3.436588  | -3.124746 | -0.563767 |
| 148 | 1 | 0 | 3.269812  | -3.911243 | 0.168950  |
| 149 | 6 | 0 | 4.761918  | -1.881621 | 1.166823  |
| 150 | 1 | 0 | 5.349999  | -0.969301 | 1.350643  |
| 151 | 6 | 0 | 5.299011  | -2.576908 | 3.319857  |
| 152 | 1 | 0 | 5.749533  | -1.569807 | 3.379152  |
| 153 | 6 | 0 | 4.310213  | -2.707663 | 4.485185  |
| 154 | 1 | 0 | 3.822773  | -3.695436 | 4.401624  |
| 155 | 6 | 0 | 5.047261  | -2.617796 | 5.827232  |
| 156 | 1 | 0 | 4.317228  | -2.728250 | 6.636678  |
| 157 | 1 | 0 | 5.473802  | -1.610161 | 5.917922  |
| 158 | 6 | 0 | 6.151931  | -3.668721 | 5.936865  |
| 159 | 1 | 0 | 5.703961  | -4.671616 | 5.922812  |
| 160 | 1 | 0 | 6.672286  | -3.566590 | 6.895020  |
| 161 | 6 | 0 | 7.136617  | -3.541513 | 4.773600  |
| 162 | 1 | 0 | 7.653486  | -2.574649 | 4.842220  |
| 163 | 1 | 0 | 7.906368  | -4.318143 | 4.833619  |
| 164 | 6 | 0 | 6.406285  | -3.632600 | 3.433580  |
| 165 | 1 | 0 | 5.948593  | -4.623858 | 3.318875  |
| 166 | 1 | 0 | 7.101962  | -3.504524 | 2.596987  |
| 167 | 6 | 0 | 2.114544  | -1.949926 | 4.493675  |
| 168 | 1 | 0 | 1.786648  | -2.996347 | 4.578666  |
| 169 | 6 | 0 | 0.923229  | 2.128906  | 1.463327  |
| 170 | 6 | 0 | -2.305301 | -0.264913 | 1.463327  |
| 171 | 6 | 0 | 1.382072  | -1.863993 | 1.463327  |
| 172 | 6 | 0 | 0.013846  | -2.298664 | -1.590910 |
| 173 | 6 | 0 | -1.997624 | 1.137341  | -1.590910 |
| 174 | 6 | 0 | 1.983779  | 1.161323  | -1.590910 |
| 175 | 8 | 0 | 2.561250  | 1.472074  | -0.627572 |
| 176 | 8 | 0 | -0.005772 | -2.954144 | -0.627572 |
| 177 | 8 | 0 | -2.555478 | 1.482071  | -0.627572 |
| 178 | 8 | 0 | -1.463477 | -0.923413 | 1.000043  |
| 179 | 8 | 0 | -0.067961 | 1.729115  | 1.000043  |
| 180 | 8 | 0 | 1.531438  | -0.805702 | 1.000043  |
| 181 | 8 | 0 | -3.151043 | 0.380510  | 1.931496  |
| 182 | 8 | 0 | 1.905053  | 2.538628  | 1.931496  |

|     |   |   |           |           |           |
|-----|---|---|-----------|-----------|-----------|
| 183 | 8 | 0 | 1.245990  | -2.919138 | 1.931496  |
| 184 | 8 | 0 | -1.448554 | 0.790079  | -2.552885 |
| 185 | 8 | 0 | 0.040048  | -1.649524 | -2.552885 |
| 186 | 8 | 0 | 1.408506  | 0.859445  | -2.552885 |

6CO2@CC3-c C1 cc3-rt

Standard orientation:

| Center Number | Atomic Number | Atomic Type | Coordinates (Angstroms) |           |           |
|---------------|---------------|-------------|-------------------------|-----------|-----------|
|               |               |             | X                       | Y         | Z         |
| 1             | 7             | 0           | -2.445492               | 4.291524  | -2.849502 |
| 2             | 7             | 0           | -0.281793               | 5.568723  | -1.388708 |
| 3             | 7             | 0           | 5.175797                | 2.176332  | -1.250301 |
| 4             | 7             | 0           | 5.351990                | -0.637468 | -1.990996 |
| 5             | 6             | 0           | -2.723998               | 1.478472  | -3.388480 |
| 6             | 1             | 0           | -2.091138               | 2.060459  | -4.053065 |
| 7             | 6             | 0           | -3.372152               | 2.132094  | -2.331042 |
| 8             | 6             | 0           | -3.189688               | 3.580718  | -2.107669 |
| 9             | 1             | 0           | -3.743982               | 4.004566  | -1.255984 |
| 10            | 6             | 0           | -2.399026               | 5.717919  | -2.584334 |
| 11            | 1             | 0           | -2.867054               | 5.962537  | -1.614026 |
| 12            | 6             | 0           | -0.939218               | 6.185124  | -2.526191 |
| 13            | 1             | 0           | -0.456688               | 5.893889  | -3.476223 |
| 14            | 6             | 0           | -0.867970               | 7.709308  | -2.367105 |
| 15            | 1             | 0           | 0.184934                | 8.011342  | -2.344073 |
| 16            | 1             | 0           | -1.296868               | 7.973109  | -1.391429 |
| 17            | 6             | 0           | -1.621694               | 8.429792  | -3.485100 |
| 18            | 1             | 0           | -1.570122               | 9.513090  | -3.333282 |
| 19            | 1             | 0           | -1.135588               | 8.219198  | -4.447374 |
| 20            | 6             | 0           | -3.076895               | 7.963318  | -3.544208 |
| 21            | 1             | 0           | -3.605495               | 8.453871  | -4.368326 |
| 22            | 1             | 0           | -3.588349               | 8.257326  | -2.617588 |
| 23            | 6             | 0           | -3.152152               | 6.445015  | -3.705908 |
| 24            | 1             | 0           | -2.712137               | 6.144675  | -4.665856 |
| 25            | 1             | 0           | -4.192262               | 6.100888  | -3.710952 |
| 26            | 6             | 0           | 0.838375                | 5.009642  | -1.591190 |
| 27            | 1             | 0           | 1.289146                | 4.946108  | -2.593056 |
| 28            | 6             | 0           | 1.615058                | 4.389367  | -0.497705 |
| 29            | 6             | 0           | 1.161635                | 4.454398  | 0.828522  |
| 30            | 1             | 0           | 0.222377                | 4.962418  | 1.032189  |
| 31            | 6             | 0           | 1.894672                | 3.868271  | 1.852520  |
| 32            | 6             | 0           | 3.092368                | 3.200070  | 1.553021  |
| 33            | 1             | 0           | 3.643148                | 2.730194  | 2.364130  |
| 34            | 6             | 0           | 3.547834                | 3.128540  | 0.242548  |
| 35            | 6             | 0           | 2.800081                | 3.724452  | -0.785042 |
| 36            | 1             | 0           | 3.160680                | 3.639678  | -1.807145 |
| 37            | 6             | 0           | 4.796592                | 2.398387  | -0.060099 |
| 38            | 1             | 0           | 5.362588                | 2.036891  | 0.812038  |
| 39            | 6             | 0           | 6.436781                | 1.479729  | -1.433728 |
| 40            | 1             | 0           | 6.770934                | 1.000009  | -0.496693 |
| 41            | 6             | 0           | 6.263626                | 0.377321  | -2.487734 |
| 42            | 1             | 0           | 5.874138                | 0.854643  | -3.404899 |
| 43            | 6             | 0           | 7.610240                | -0.289688 | -2.795408 |
| 44            | 1             | 0           | 7.454801                | -1.058860 | -3.559797 |
| 45            | 1             | 0           | 7.951817                | -0.806123 | -1.888836 |
| 46            | 6             | 0           | 8.656758                | 0.729292  | -3.246211 |
| 47            | 1             | 0           | 8.338916                | 1.184650  | -4.193990 |

|     |   |   |            |           |           |
|-----|---|---|------------|-----------|-----------|
| 48  | 1 | 0 | 9.609920   | 0.225971  | -3.439444 |
| 49  | 6 | 0 | 8.830839   | 1.826016  | -2.194733 |
| 50  | 1 | 0 | 9.236769   | 1.383506  | -1.274949 |
| 51  | 1 | 0 | 9.554875   | 2.574273  | -2.534009 |
| 52  | 6 | 0 | 7.492306   | 2.496822  | -1.887579 |
| 53  | 1 | 0 | 7.112892   | 3.009430  | -2.781337 |
| 54  | 1 | 0 | 7.603354   | 3.258083  | -1.107411 |
| 55  | 6 | 0 | 4.362292   | -0.949784 | -2.721035 |
| 56  | 1 | 0 | 4.158594   | -0.443686 | -3.677203 |
| 57  | 7 | 0 | -5.823717  | -0.213972 | 0.238728  |
| 58  | 7 | 0 | -4.883744  | -1.411433 | 2.699190  |
| 59  | 7 | 0 | 0.217670   | 1.387954  | 5.486551  |
| 60  | 7 | 0 | 1.963736   | 3.332134  | 4.198159  |
| 61  | 6 | 0 | -4.199959  | 1.407979  | -1.480723 |
| 62  | 1 | 0 | -4.727460  | 1.896821  | -0.666394 |
| 63  | 6 | 0 | -4.350663  | 0.023614  | -1.645001 |
| 64  | 6 | 0 | -5.188857  | -0.759540 | -0.714162 |
| 65  | 1 | 0 | -5.228492  | -1.843604 | -0.901188 |
| 66  | 6 | 0 | -6.657349  | -1.058467 | 1.072076  |
| 67  | 1 | 0 | -6.543803  | -2.125291 | 0.807497  |
| 68  | 6 | 0 | -6.233010  | -0.901766 | 2.538930  |
| 69  | 1 | 0 | -6.290729  | 0.171530  | 2.793123  |
| 70  | 6 | 0 | -7.172563  | -1.693785 | 3.457231  |
| 71  | 1 | 0 | -6.854329  | -1.548207 | 4.495483  |
| 72  | 1 | 0 | -7.051734  | -2.761831 | 3.233225  |
| 73  | 6 | 0 | -8.631343  | -1.277968 | 3.266250  |
| 74  | 1 | 0 | -9.278298  | -1.873611 | 3.918871  |
| 75  | 1 | 0 | -8.753841  | -0.228783 | 3.567578  |
| 76  | 6 | 0 | -9.052434  | -1.433312 | 1.804159  |
| 77  | 1 | 0 | -10.086707 | -1.101767 | 1.664386  |
| 78  | 1 | 0 | -9.018885  | -2.496432 | 1.529631  |
| 79  | 6 | 0 | -8.121015  | -0.641440 | 0.886221  |
| 80  | 1 | 0 | -8.201485  | 0.432060  | 1.101185  |
| 81  | 1 | 0 | -8.395703  | -0.776921 | -0.165541 |
| 82  | 6 | 0 | -4.056665  | -0.693897 | 3.339465  |
| 83  | 1 | 0 | -4.324438  | 0.297632  | 3.734480  |
| 84  | 6 | 0 | -2.668907  | -1.134521 | 3.592239  |
| 85  | 6 | 0 | -2.238899  | -2.403287 | 3.177892  |
| 86  | 1 | 0 | -2.941618  | -3.040984 | 2.648143  |
| 87  | 6 | 0 | -0.946803  | -2.832945 | 3.451121  |
| 88  | 6 | 0 | -0.066986  | -1.981350 | 4.135448  |
| 89  | 1 | 0 | 0.934969   | -2.337934 | 4.358619  |
| 90  | 6 | 0 | -0.467653  | -0.702980 | 4.506367  |
| 91  | 6 | 0 | -1.780239  | -0.283278 | 4.239704  |
| 92  | 1 | 0 | -2.082717  | 0.715254  | 4.546215  |
| 93  | 6 | 0 | 0.499510   | 0.190000  | 5.177340  |
| 94  | 1 | 0 | 1.487024   | -0.250733 | 5.384199  |
| 95  | 6 | 0 | 1.226251   | 2.150202  | 6.201337  |
| 96  | 1 | 0 | 2.202989   | 1.634409  | 6.190104  |
| 97  | 6 | 0 | 1.415206   | 3.516468  | 5.529933  |
| 98  | 1 | 0 | 0.427820   | 4.010340  | 5.493124  |
| 99  | 6 | 0 | 2.385956   | 4.384644  | 6.340987  |
| 100 | 1 | 0 | 2.486878   | 5.355906  | 5.844205  |
| 101 | 1 | 0 | 3.375243   | 3.909171  | 6.315330  |
| 102 | 6 | 0 | 1.920821   | 4.553218  | 7.787422  |
| 103 | 1 | 0 | 0.967456   | 5.098607  | 7.803028  |
| 104 | 1 | 0 | 2.643041   | 5.159649  | 8.344055  |
| 105 | 6 | 0 | 1.732278   | 3.191354  | 8.456791  |
| 106 | 1 | 0 | 2.704462   | 2.684609  | 8.525330  |

|     |   |   |           |           |           |
|-----|---|---|-----------|-----------|-----------|
| 107 | 1 | 0 | 1.364446  | 3.313022  | 9.481036  |
| 108 | 6 | 0 | 0.762879  | 2.324096  | 7.653693  |
| 109 | 1 | 0 | -0.234604 | 2.782631  | 7.643135  |
| 110 | 1 | 0 | 0.652632  | 1.333155  | 8.107696  |
| 111 | 6 | 0 | 1.396146  | 3.942532  | 3.241812  |
| 112 | 1 | 0 | 0.490381  | 4.549933  | 3.390928  |
| 113 | 7 | 0 | -2.407642 | -1.783230 | -4.970366 |
| 114 | 7 | 0 | 0.172711  | -3.089853 | -4.898656 |
| 115 | 7 | 0 | 1.949689  | -5.326151 | 0.836769  |
| 116 | 7 | 0 | 0.628591  | -4.644810 | 3.324434  |
| 117 | 6 | 0 | -3.698881 | -0.617610 | -2.691990 |
| 118 | 1 | 0 | -3.804341 | -1.688796 | -2.844201 |
| 119 | 6 | 0 | -2.889050 | 0.110950  | -3.574241 |
| 120 | 6 | 0 | -2.219354 | -0.557096 | -4.707791 |
| 121 | 1 | 0 | -1.565154 | 0.080974  | -5.321171 |
| 122 | 6 | 0 | -1.767020 | -2.329717 | -6.150672 |
| 123 | 1 | 0 | -1.094404 | -1.592585 | -6.624921 |
| 124 | 6 | 0 | -0.913998 | -3.539676 | -5.746223 |
| 125 | 1 | 0 | -1.574146 | -4.249969 | -5.216710 |
| 126 | 6 | 0 | -0.321591 | -4.221009 | -6.985528 |
| 127 | 1 | 0 | 0.266799  | -5.087360 | -6.664133 |
| 128 | 1 | 0 | 0.376917  | -3.519747 | -7.460399 |
| 129 | 6 | 0 | -1.409569 | -4.631968 | -7.977731 |
| 130 | 1 | 0 | -0.955772 | -5.097403 | -8.859021 |
| 131 | 1 | 0 | -2.058264 | -5.388914 | -7.516254 |
| 132 | 6 | 0 | -2.255937 | -3.424126 | -8.382781 |
| 133 | 1 | 0 | -3.055312 | -3.725975 | -9.067704 |
| 134 | 1 | 0 | -1.625270 | -2.707041 | -8.925731 |
| 135 | 6 | 0 | -2.853194 | -2.745000 | -7.150228 |
| 136 | 1 | 0 | -3.544093 | -3.428789 | -6.640103 |
| 137 | 1 | 0 | -3.432193 | -1.858202 | -7.430240 |
| 138 | 6 | 0 | 0.290279  | -3.622744 | -3.754225 |
| 139 | 1 | 0 | -0.415828 | -4.381812 | -3.384683 |
| 140 | 6 | 0 | 1.406631  | -3.287828 | -2.846274 |
| 141 | 6 | 0 | 2.324535  | -2.280376 | -3.176328 |
| 142 | 1 | 0 | 2.171152  | -1.717951 | -4.093601 |
| 143 | 6 | 0 | 3.406976  | -2.014005 | -2.346964 |
| 144 | 6 | 0 | 3.581110  | -2.763995 | -1.172370 |
| 145 | 1 | 0 | 4.434639  | -2.545218 | -0.535160 |
| 146 | 6 | 0 | 2.664160  | -3.750760 | -0.828578 |
| 147 | 6 | 0 | 1.568255  | -4.002232 | -1.666468 |
| 148 | 1 | 0 | 0.855486  | -4.769255 | -1.374903 |
| 149 | 6 | 0 | 2.829856  | -4.508904 | 0.428686  |
| 150 | 1 | 0 | 3.747090  | -4.300432 | 0.999947  |
| 151 | 6 | 0 | 2.206388  | -6.029446 | 2.079940  |
| 152 | 1 | 0 | 3.011265  | -5.542756 | 2.658729  |
| 153 | 6 | 0 | 0.932249  | -6.008875 | 2.936014  |
| 154 | 1 | 0 | 0.119906  | -6.445128 | 2.327058  |
| 155 | 6 | 0 | 1.121169  | -6.846865 | 4.206145  |
| 156 | 1 | 0 | 0.192415  | -6.821903 | 4.786551  |
| 157 | 1 | 0 | 1.894314  | -6.367958 | 4.820946  |
| 158 | 6 | 0 | 1.525511  | -8.284018 | 3.877502  |
| 159 | 1 | 0 | 0.712185  | -8.775595 | 3.326510  |
| 160 | 1 | 0 | 1.671895  | -8.852620 | 4.801879  |
| 161 | 6 | 0 | 2.795655  | -8.306716 | 3.025925  |
| 162 | 1 | 0 | 3.630434  | -7.899118 | 3.612101  |
| 163 | 1 | 0 | 3.064678  | -9.334983 | 2.762114  |
| 164 | 6 | 0 | 2.612178  | -7.473544 | 1.757310  |
| 165 | 1 | 0 | 1.831645  | -7.916110 | 1.124454  |

|     |   |   |           |           |           |
|-----|---|---|-----------|-----------|-----------|
| 166 | 1 | 0 | 3.531966  | -7.454969 | 1.162132  |
| 167 | 6 | 0 | -0.518190 | -4.185419 | 3.036964  |
| 168 | 1 | 0 | -1.261679 | -4.772966 | 2.476914  |
| 169 | 8 | 0 | -0.682550 | 1.974971  | 2.401805  |
| 170 | 8 | 0 | -0.343475 | -0.603783 | -1.911324 |
| 171 | 8 | 0 | -2.038549 | -0.249162 | 0.610278  |
| 172 | 8 | 0 | 2.418571  | -2.211430 | 2.295030  |
| 173 | 6 | 0 | 0.270712  | 1.323407  | 2.268613  |
| 174 | 6 | 0 | -2.680876 | 0.634486  | 1.013447  |
| 175 | 6 | 0 | -0.907996 | -1.575867 | -1.612485 |
| 176 | 6 | 0 | 1.570408  | -2.021687 | 1.523559  |
| 177 | 8 | 0 | 0.726981  | -1.836513 | 0.741622  |
| 178 | 8 | 0 | 1.229760  | 0.675525  | 2.144683  |
| 179 | 8 | 0 | -3.326653 | 1.505519  | 1.432918  |
| 180 | 8 | 0 | -1.469564 | -2.558447 | -1.342582 |
| 181 | 6 | 0 | 2.759835  | 0.266015  | -0.384750 |
| 182 | 6 | 0 | -0.214286 | 2.155902  | -1.620868 |
| 183 | 8 | 0 | -0.630531 | 2.051407  | -0.537606 |
| 184 | 8 | 0 | 0.197917  | 2.288143  | -2.698996 |
| 185 | 8 | 0 | 2.131633  | 0.715651  | -1.252974 |
| 186 | 8 | 0 | 3.397262  | -0.180016 | 0.481158  |

(CO2)4 S4 cc3-rjjx

Standard orientation:

| Center<br>Number | Atomic<br>Number | Atomic<br>Type | Coordinates (Angstroms) |           |           |
|------------------|------------------|----------------|-------------------------|-----------|-----------|
|                  |                  |                | X                       | Y         | Z         |
| 1                | 6                | 0              | 0.154578                | 1.664139  | 1.346603  |
| 2                | 6                | 0              | 1.664139                | -0.154578 | -1.346603 |
| 3                | 6                | 0              | -1.664139               | 0.154578  | -1.346603 |
| 4                | 6                | 0              | -0.154578               | -1.664139 | 1.346603  |
| 5                | 8                | 0              | -0.872382               | 1.166251  | 1.105034  |
| 6                | 8                | 0              | 1.166251                | 0.872382  | -1.105034 |
| 7                | 8                | 0              | -1.166251               | -0.872382 | -1.105034 |
| 8                | 8                | 0              | 0.872382                | -1.166251 | 1.105034  |
| 9                | 8                | 0              | 1.166251                | 2.165482  | 1.609008  |
| 10               | 8                | 0              | 2.165482                | -1.166251 | -1.609008 |
| 11               | 8                | 0              | -2.165482               | 1.166251  | -1.609008 |
| 12               | 8                | 0              | -1.166251               | -2.165482 | 1.609008  |

(CO2)6-a Th cc3-rjjjx

Standard orientation:

| Center<br>Number | Atomic<br>Number | Atomic<br>Type | Coordinates (Angstroms) |           |           |
|------------------|------------------|----------------|-------------------------|-----------|-----------|
|                  |                  |                | X                       | Y         | Z         |
| 1                | 8                | 0              | -0.000000               | 1.162777  | 2.494534  |
| 2                | 8                | 0              | -0.000000               | -1.162777 | -2.494534 |
| 3                | 8                | 0              | -1.162777               | 2.494534  | 0.000000  |
| 4                | 8                | 0              | -2.494534               | 0.000000  | 1.162777  |
| 5                | 6                | 0              | 0.000000                | -0.000000 | 2.501470  |
| 6                | 6                | 0              | 0.000000                | 2.501470  | -0.000000 |
| 7                | 6                | 0              | -0.000000               | -0.000000 | -2.501470 |
| 8                | 6                | 0              | -2.501470               | 0.000000  | -0.000000 |
| 9                | 8                | 0              | -2.494534               | 0.000000  | -1.162777 |
| 10               | 8                | 0              | -0.000000               | -1.162777 | 2.494534  |

|    |   |   |           |           |           |
|----|---|---|-----------|-----------|-----------|
| 11 | 8 | 0 | 1.162777  | 2.494534  | -0.000000 |
| 12 | 8 | 0 | 0.000000  | 1.162777  | -2.494534 |
| 13 | 6 | 0 | -0.000000 | -2.501470 | 0.000000  |
| 14 | 6 | 0 | 2.501470  | -0.000000 | 0.000000  |
| 15 | 8 | 0 | 2.494534  | 0.000000  | 1.162777  |
| 16 | 8 | 0 | 2.494534  | -0.000000 | -1.162777 |
| 17 | 8 | 0 | -1.162777 | -2.494534 | 0.000000  |
| 18 | 8 | 0 | 1.162777  | -2.494534 | -0.000000 |

-----  
(CO2) 6-b C1 cc3-rtx

Standard orientation:

| Center<br>Number | Atomic<br>Number | Atomic<br>Type | Coordinates (Angstroms) |           |           |
|------------------|------------------|----------------|-------------------------|-----------|-----------|
|                  |                  |                | X                       | Y         | Z         |
| 1                | 8                | 0              | 0.768060                | -1.220938 | -2.733855 |
| 2                | 8                | 0              | 0.990496                | 1.138544  | 1.806043  |
| 3                | 8                | 0              | 1.362748                | -1.346935 | 0.180221  |
| 4                | 8                | 0              | -1.252292               | -2.881467 | 0.349872  |
| 5                | 6                | 0              | -0.229496               | -0.930419 | -2.215405 |
| 6                | 6                | 0              | 2.346340                | -0.974972 | -0.327663 |
| 7                | 6                | 0              | 0.897928                | 0.227870  | 2.525384  |
| 8                | 6                | 0              | -1.303927               | -1.825225 | 0.826082  |
| 9                | 8                | 0              | -1.358259               | -0.766154 | 1.310069  |
| 10               | 8                | 0              | -1.237626               | -0.651041 | -1.704306 |
| 11               | 8                | 0              | 3.334374                | -0.617277 | -0.814034 |
| 12               | 8                | 0              | 0.828766                | -0.673763 | 3.253585  |
| 13               | 6                | 0              | -2.630351               | 1.179877  | -0.154476 |
| 14               | 6                | 0              | 0.909439                | 2.319172  | -0.654849 |
| 15               | 8                | 0              | 0.984898                | 1.264922  | -1.149943 |
| 16               | 8                | 0              | 0.858861                | 3.377418  | -0.187879 |
| 17               | 8                | 0              | -1.710294               | 1.889851  | -0.092510 |
| 18               | 8                | 0              | -3.562182               | 0.489613  | -0.216569 |

-----  
(CO2) 6-c S6 cc3-rtxx

Standard orientation:

| Center<br>Number | Atomic<br>Number | Atomic<br>Type | Coordinates (Angstroms) |           |           |
|------------------|------------------|----------------|-------------------------|-----------|-----------|
|                  |                  |                | X                       | Y         | Z         |
| 1                | 6                | 0              | 1.156290                | 1.858643  | 1.311233  |
| 2                | 8                | 0              | 2.302820                | 2.010849  | 1.389852  |
| 3                | 8                | 0              | 0.000000                | 1.722454  | 1.248209  |
| 4                | 6                | 0              | 2.187777                | -0.072055 | -1.311233 |
| 5                | 8                | 0              | 1.491689                | 0.861227  | -1.248209 |
| 6                | 8                | 0              | 2.892857                | -0.988876 | -1.389852 |
| 7                | 6                | 0              | -2.187777               | 0.072055  | 1.311233  |
| 8                | 8                | 0              | -2.892857               | 0.988876  | 1.389852  |
| 9                | 8                | 0              | -1.491689               | -0.861227 | 1.248209  |
| 10               | 6                | 0              | -1.156290               | -1.858643 | -1.311233 |
| 11               | 8                | 0              | -0.000000               | -1.722454 | -1.248209 |
| 12               | 8                | 0              | -2.302820               | -2.010849 | -1.389852 |
| 13               | 6                | 0              | 1.031487                | -1.930698 | 1.311233  |
| 14               | 8                | 0              | 0.590036                | -2.999726 | 1.389852  |
| 15               | 8                | 0              | 1.491689                | -0.861227 | 1.248209  |
| 16               | 6                | 0              | -1.031487               | 1.930698  | -1.311233 |
| 17               | 8                | 0              | -0.590036               | 2.999726  | -1.389852 |

18 8 0 -1.491689 0.861227 -1.248209

(C2H2)@CC3 C3 cc3-rco2cc

Standard orientation:

| Center<br>Number | Atomic<br>Number | Atomic<br>Type | Coordinates (Angstroms) |           |           |
|------------------|------------------|----------------|-------------------------|-----------|-----------|
|                  |                  |                | X                       | Y         | Z         |
| 1                | 7                | 0              | -4.767424               | 0.681472  | 3.009569  |
| 2                | 7                | 0              | -3.387420               | 3.191145  | 3.231521  |
| 3                | 7                | 0              | -0.556827               | 5.302074  | -2.129721 |
| 4                | 7                | 0              | -0.106405               | 3.709431  | -4.486434 |
| 5                | 6                | 0              | -4.066985               | -1.174481 | 0.929794  |
| 6                | 1                | 0              | -4.751664               | -0.368739 | 0.677597  |
| 7                | 6                | 0              | -3.483612               | -1.182380 | 2.204697  |
| 8                | 6                | 0              | -3.823422               | -0.143989 | 3.198372  |
| 9                | 1                | 0              | -3.221738               | -0.149047 | 4.119947  |
| 10               | 6                | 0              | -5.054242               | 1.636638  | 4.061110  |
| 11               | 1                | 0              | -4.391099               | 1.491586  | 4.933013  |
| 12               | 6                | 0              | -4.799229               | 3.055142  | 3.525618  |
| 13               | 1                | 0              | -5.418217               | 3.183241  | 2.619066  |
| 14               | 6                | 0              | -5.198543               | 4.104668  | 4.568355  |
| 15               | 1                | 0              | -5.019524               | 5.102305  | 4.152831  |
| 16               | 1                | 0              | -4.533221               | 3.996141  | 5.434766  |
| 17               | 6                | 0              | -6.655923               | 3.941683  | 5.000747  |
| 18               | 1                | 0              | -6.907907               | 4.691474  | 5.758123  |
| 19               | 1                | 0              | -7.314656               | 4.124407  | 4.140767  |
| 20               | 6                | 0              | -6.907796               | 2.530867  | 5.535772  |
| 21               | 1                | 0              | -7.959544               | 2.406970  | 5.814592  |
| 22               | 1                | 0              | -6.316682               | 2.380946  | 6.449577  |
| 23               | 6                | 0              | -6.514496               | 1.479626  | 4.497495  |
| 24               | 1                | 0              | -7.149328               | 1.572945  | 3.606783  |
| 25               | 1                | 0              | -6.660570               | 0.466298  | 4.887046  |
| 26               | 6                | 0              | -3.050172               | 3.456826  | 2.038915  |
| 27               | 1                | 0              | -3.793251               | 3.586373  | 1.236548  |
| 28               | 6                | 0              | -1.639275               | 3.643126  | 1.647139  |
| 29               | 6                | 0              | -0.605671               | 3.369664  | 2.554538  |
| 30               | 1                | 0              | -0.863149               | 2.980510  | 3.536113  |
| 31               | 6                | 0              | 0.717835                | 3.608087  | 2.204697  |
| 32               | 6                | 0              | 1.016362                | 4.109352  | 0.929794  |
| 33               | 1                | 0              | 2.056494                | 4.299431  | 0.677597  |
| 34               | 6                | 0              | 0.000000                | 4.371665  | 0.019220  |
| 35               | 6                | 0              | -1.332571               | 4.133572  | 0.384096  |
| 36               | 1                | 0              | -2.115774               | 4.356488  | -0.335956 |
| 37               | 6                | 0              | 0.332560                | 4.933542  | -1.304712 |
| 38               | 1                | 0              | 1.407194                | 5.031200  | -1.524588 |
| 39               | 6                | 0              | -0.116758               | 5.878045  | -3.385187 |
| 40               | 1                | 0              | 0.984894                | 5.866582  | -3.471878 |
| 41               | 6                | 0              | -0.677796               | 5.040458  | -4.545084 |
| 42               | 1                | 0              | -1.776780               | 5.014380  | -4.432012 |
| 43               | 6                | 0              | -0.320807               | 5.680334  | -5.891195 |
| 44               | 1                | 0              | -0.742960               | 5.069015  | -6.696216 |
| 45               | 1                | 0              | 0.770500                | 5.649849  | -6.006489 |
| 46               | 6                | 0              | -0.818959               | 7.123380  | -5.977064 |
| 47               | 1                | 0              | -1.916676               | 7.133499  | -5.935232 |
| 48               | 1                | 0              | -0.534114               | 7.561172  | -6.939565 |
| 49               | 6                | 0              | -0.264458               | 7.958139  | -4.821335 |
| 50               | 1                | 0              | 0.827825                | 8.025907  | -4.916864 |

|     |   |   |           |           |           |
|-----|---|---|-----------|-----------|-----------|
| 51  | 1 | 0 | -0.650949 | 8.981792  | -4.865711 |
| 52  | 6 | 0 | -0.618143 | 7.323638  | -3.475890 |
| 53  | 1 | 0 | -1.706886 | 7.318044  | -3.335297 |
| 54  | 1 | 0 | -0.193092 | 7.897794  | -2.645443 |
| 55  | 6 | 0 | -0.902532 | 2.729408  | -4.372643 |
| 56  | 1 | 0 | -1.993088 | 2.868838  | -4.310160 |
| 57  | 7 | 0 | -1.069902 | -4.529164 | 3.231521  |
| 58  | 7 | 0 | 1.793540  | -4.469447 | 3.009569  |
| 59  | 7 | 0 | 4.457322  | 1.338019  | 3.231521  |
| 60  | 7 | 0 | 2.973885  | 3.787975  | 3.009569  |
| 61  | 6 | 0 | -2.615379 | -2.209359 | 2.554538  |
| 62  | 1 | 0 | -2.149623 | -2.237764 | 3.536113  |
| 63  | 6 | 0 | -2.335402 | -3.241217 | 1.647139  |
| 64  | 6 | 0 | -1.468613 | -4.369939 | 2.038915  |
| 65  | 1 | 0 | -1.209264 | -5.078239 | 1.236548  |
| 66  | 6 | 0 | -0.246216 | -5.683825 | 3.525618  |
| 67  | 1 | 0 | -0.047659 | -6.283934 | 2.619066  |
| 68  | 6 | 0 | 1.109751  | -5.195421 | 4.061110  |
| 69  | 1 | 0 | 0.903798  | -4.548597 | 4.933013  |
| 70  | 6 | 0 | 1.975854  | -6.381532 | 4.497495  |
| 71  | 1 | 0 | 2.926459  | -6.001372 | 4.887046  |
| 72  | 1 | 0 | 2.212454  | -6.977972 | 3.606783  |
| 73  | 6 | 0 | 1.262103  | -7.247760 | 5.535772  |
| 74  | 1 | 0 | 1.895274  | -8.096652 | 5.814592  |
| 75  | 1 | 0 | 1.096382  | -6.660880 | 6.449577  |
| 76  | 6 | 0 | -0.085637 | -7.735040 | 5.000747  |
| 77  | 1 | 0 | -0.608982 | -8.328160 | 5.758123  |
| 78  | 1 | 0 | 0.085487  | -8.396881 | 4.140767  |
| 79  | 6 | 0 | -0.955475 | -6.554404 | 4.568355  |
| 80  | 1 | 0 | -1.194149 | -5.923955 | 5.434766  |
| 81  | 1 | 0 | -1.908964 | -6.898188 | 4.152831  |
| 82  | 6 | 0 | 2.036409  | -3.239186 | 3.198372  |
| 83  | 1 | 0 | 1.739947  | -2.715583 | 4.119947  |
| 84  | 6 | 0 | 2.765777  | -2.425707 | 2.204697  |
| 85  | 6 | 0 | 3.050622  | -2.934872 | 0.929794  |
| 86  | 1 | 0 | 2.695169  | -3.930692 | 0.677597  |
| 87  | 6 | 0 | 3.785973  | -2.185833 | 0.019220  |
| 88  | 6 | 0 | 4.246064  | -0.912746 | 0.384096  |
| 89  | 1 | 0 | 4.830717  | -0.345930 | -0.335956 |
| 90  | 6 | 0 | 3.974678  | -0.401909 | 1.647139  |
| 91  | 6 | 0 | 3.221051  | -1.160305 | 2.554538  |
| 92  | 1 | 0 | 3.012772  | -0.742746 | 3.536113  |
| 93  | 6 | 0 | 4.518785  | 0.913113  | 2.038915  |
| 94  | 1 | 0 | 5.002516  | 1.491866  | 1.236548  |
| 95  | 6 | 0 | 5.045445  | 2.628683  | 3.525618  |
| 96  | 1 | 0 | 5.465876  | 3.100693  | 2.619066  |
| 97  | 6 | 0 | 3.944491  | 3.558783  | 4.061110  |
| 98  | 1 | 0 | 3.487301  | 3.057010  | 4.933013  |
| 99  | 6 | 0 | 4.538642  | 4.901906  | 4.497495  |
| 100 | 1 | 0 | 3.734111  | 5.535074  | 4.887046  |
| 101 | 1 | 0 | 4.936875  | 5.405027  | 3.606783  |
| 102 | 6 | 0 | 5.645693  | 4.716893  | 5.535772  |
| 103 | 1 | 0 | 5.220301  | 4.279934  | 6.449577  |
| 104 | 1 | 0 | 6.064269  | 5.689682  | 5.814592  |
| 105 | 6 | 0 | 6.741559  | 3.793356  | 5.000747  |
| 106 | 1 | 0 | 7.229169  | 4.272475  | 4.140767  |
| 107 | 1 | 0 | 7.516889  | 3.636686  | 5.758123  |
| 108 | 6 | 0 | 6.154018  | 2.449736  | 4.568355  |
| 109 | 1 | 0 | 5.727370  | 1.927814  | 5.434766  |



|     |   |   |           |           |           |
|-----|---|---|-----------|-----------|-----------|
| 110 | 1 | 0 | 6.928488  | 1.795883  | 4.152831  |
| 111 | 6 | 0 | 1.787013  | 3.383175  | 3.198372  |
| 112 | 1 | 0 | 1.481791  | 2.864630  | 4.119947  |
| 113 | 7 | 0 | -4.313317 | -3.133263 | -2.129721 |
| 114 | 7 | 0 | -3.159259 | -1.946865 | -4.486434 |
| 115 | 7 | 0 | 3.265664  | -1.762566 | -4.486434 |
| 116 | 7 | 0 | 4.870144  | -2.168811 | -2.129721 |
| 117 | 6 | 0 | -2.913493 | -3.220826 | 0.384096  |
| 118 | 1 | 0 | -2.714943 | -4.010558 | -0.335956 |
| 119 | 6 | 0 | -3.785973 | -2.185833 | 0.019220  |
| 120 | 6 | 0 | -4.438853 | -2.178766 | -1.304712 |
| 121 | 1 | 0 | -5.060744 | -1.296934 | -1.524588 |
| 122 | 6 | 0 | -5.032157 | -3.040138 | -3.385187 |
| 123 | 1 | 0 | -5.573056 | -2.080348 | -3.471878 |
| 124 | 6 | 0 | -4.026267 | -3.107217 | -4.545084 |
| 125 | 1 | 0 | -3.454190 | -4.045926 | -4.432012 |
| 126 | 6 | 0 | -4.758910 | -3.117994 | -5.891195 |
| 127 | 1 | 0 | -4.018416 | -3.177930 | -6.696216 |
| 128 | 1 | 0 | -5.278163 | -2.157651 | -6.006489 |
| 129 | 6 | 0 | -5.759548 | -4.270930 | -5.977064 |
| 130 | 1 | 0 | -6.281110 | -4.243143 | -6.939565 |
| 131 | 1 | 0 | -5.219453 | -5.226639 | -5.935232 |
| 132 | 6 | 0 | -6.759721 | -4.208097 | -4.821335 |
| 133 | 1 | 0 | -7.452986 | -5.054634 | -4.865711 |
| 134 | 1 | 0 | -7.364552 | -3.296036 | -4.916864 |
| 135 | 6 | 0 | -6.033385 | -4.197147 | -3.475890 |
| 136 | 1 | 0 | -5.484168 | -5.137229 | -3.335297 |
| 137 | 1 | 0 | -6.743144 | -4.116120 | -2.645443 |
| 138 | 6 | 0 | -1.912471 | -2.146319 | -4.372643 |
| 139 | 1 | 0 | -1.487943 | -3.160484 | -4.310160 |
| 140 | 6 | 0 | -0.934495 | -1.040996 | -4.338643 |
| 141 | 6 | 0 | -1.360734 | 0.294646  | -4.336797 |
| 142 | 1 | 0 | -2.428414 | 0.498468  | -4.344078 |
| 143 | 6 | 0 | -0.434282 | 1.329795  | -4.338643 |
| 144 | 6 | 0 | 0.935538  | 1.031107  | -4.336797 |
| 145 | 1 | 0 | 1.645893  | 1.853834  | -4.344078 |
| 146 | 6 | 0 | 1.368777  | -0.288798 | -4.338643 |
| 147 | 6 | 0 | 0.425196  | -1.325753 | -4.336797 |
| 148 | 1 | 0 | 0.782521  | -2.352302 | -4.344078 |
| 149 | 6 | 0 | 2.815002  | -0.583089 | -4.372643 |
| 150 | 1 | 0 | 3.481031  | 0.291645  | -4.310160 |
| 151 | 6 | 0 | 4.704063  | -1.933241 | -4.545084 |
| 152 | 1 | 0 | 5.230970  | -0.968453 | -4.432012 |
| 153 | 6 | 0 | 5.148915  | -2.837907 | -3.385187 |
| 154 | 1 | 0 | 4.588162  | -3.786234 | -3.471878 |
| 155 | 6 | 0 | 6.651528  | -3.126491 | -3.475890 |
| 156 | 1 | 0 | 6.936236  | -3.781674 | -2.645443 |
| 157 | 1 | 0 | 7.191055  | -2.180815 | -3.335297 |
| 158 | 6 | 0 | 7.024179  | -3.750042 | -4.821335 |
| 159 | 1 | 0 | 6.536727  | -4.729871 | -4.916864 |
| 160 | 1 | 0 | 8.103935  | -3.927158 | -4.865711 |
| 161 | 6 | 0 | 6.578508  | -2.852450 | -5.977064 |
| 162 | 1 | 0 | 7.136129  | -1.906860 | -5.935232 |
| 163 | 1 | 0 | 6.815225  | -3.318030 | -6.939565 |
| 164 | 6 | 0 | 5.079717  | -2.562340 | -5.891195 |
| 165 | 1 | 0 | 4.507662  | -3.492197 | -6.006489 |
| 166 | 1 | 0 | 4.761376  | -1.891085 | -6.696216 |
| 167 | 6 | 0 | 4.106293  | -2.754776 | -1.304712 |
| 168 | 1 | 0 | 3.653549  | -3.734266 | -1.524588 |

|     |   |   |          |          |          |
|-----|---|---|----------|----------|----------|
| 169 | 6 | 0 | 0.000000 | 0.000000 | 4.612552 |
| 170 | 6 | 0 | 0.000000 | 0.000000 | 3.408091 |
| 171 | 1 | 0 | 0.000000 | 0.000000 | 5.680120 |
| 172 | 1 | 0 | 0.000000 | 0.000000 | 2.338835 |

(C2H2)4@CC3 C2 cc3-rjjcc

Standard orientation:

| Center<br>Number | Atomic<br>Number | Atomic<br>Type | Coordinates (Angstroms) |           |            |
|------------------|------------------|----------------|-------------------------|-----------|------------|
|                  |                  |                | X                       | Y         | Z          |
| 1                | 7                | 0              | -0.928410               | -1.113095 | -5.741579  |
| 2                | 7                | 0              | 0.928410                | 1.113095  | -5.741579  |
| 3                | 7                | 0              | 5.503860                | 0.542590  | -1.230947  |
| 4                | 7                | 0              | 5.500153                | -1.092009 | 1.163046   |
| 5                | 6                | 0              | -1.437616               | -2.712021 | -3.371403  |
| 6                | 1                | 0              | -0.560368               | -2.969043 | -3.960138  |
| 7                | 6                | 0              | -2.192476               | -1.591595 | -3.744678  |
| 8                | 6                | 0              | -1.842125               | -0.782499 | -4.927611  |
| 9                | 1                | 0              | -2.446796               | 0.126612  | -5.070086  |
| 10               | 6                | 0              | -0.723023               | -0.258765 | -6.896025  |
| 11               | 1                | 0              | -1.388690               | 0.622917  | -6.869744  |
| 12               | 6                | 0              | 0.723023                | 0.258765  | -6.896025  |
| 13               | 1                | 0              | 1.388690                | -0.622917 | -6.869744  |
| 14               | 6                | 0              | 1.004353                | 1.069321  | -8.166519  |
| 15               | 1                | 0              | 2.044902                | 1.411131  | -8.143328  |
| 16               | 1                | 0              | 0.373672                | 1.967679  | -8.146134  |
| 17               | 6                | 0              | 0.720342                | 0.256513  | -9.429817  |
| 18               | 1                | 0              | 0.912340                | 0.866663  | -10.318748 |
| 19               | 1                | 0              | 1.408060                | -0.598911 | -9.476182  |
| 20               | 6                | 0              | -0.720342               | -0.256513 | -9.429817  |
| 21               | 1                | 0              | -0.912340               | -0.866663 | -10.318748 |
| 22               | 1                | 0              | -1.408060               | 0.598911  | -9.476182  |
| 23               | 6                | 0              | -1.004353               | -1.069321 | -8.166519  |
| 24               | 1                | 0              | -0.373672               | -1.967679 | -8.146134  |
| 25               | 1                | 0              | -2.044902               | -1.411131 | -8.143328  |
| 26               | 6                | 0              | 1.842125                | 0.782499  | -4.927611  |
| 27               | 1                | 0              | 2.446796                | -0.126612 | -5.070086  |
| 28               | 6                | 0              | 2.192476                | 1.591595  | -3.744678  |
| 29               | 6                | 0              | 1.437616                | 2.712021  | -3.371403  |
| 30               | 1                | 0              | 0.560368                | 2.969043  | -3.960138  |
| 31               | 6                | 0              | 1.810927                | 3.473898  | -2.267523  |
| 32               | 6                | 0              | 2.949382                | 3.114084  | -1.535011  |
| 33               | 1                | 0              | 3.238065                | 3.726041  | -0.684758  |
| 34               | 6                | 0              | 3.688759                | 1.991451  | -1.880756  |
| 35               | 6                | 0              | 3.310480                | 1.238845  | -2.998545  |
| 36               | 1                | 0              | 3.907898                | 0.373821  | -3.275816  |
| 37               | 6                | 0              | 4.855311                | 1.620760  | -1.060973  |
| 38               | 1                | 0              | 5.136578                | 2.347293  | -0.283312  |
| 39               | 6                | 0              | 6.685354                | 0.345567  | -0.407808  |
| 40               | 1                | 0              | 6.741192                | 1.100916  | 0.396017   |
| 41               | 6                | 0              | 6.631832                | -1.035030 | 0.257234   |
| 42               | 1                | 0              | 6.539678                | -1.786057 | -0.548927  |
| 43               | 6                | 0              | 7.918437                | -1.300044 | 1.047486   |
| 44               | 1                | 0              | 7.854232                | -2.294900 | 1.501385   |
| 45               | 1                | 0              | 7.970478                | -0.576485 | 1.871470   |
| 46               | 6                | 0              | 9.158074                | -1.179154 | 0.160700   |
| 47               | 1                | 0              | 9.130251                | -1.958242 | -0.613252  |

|     |   |   |            |           |           |
|-----|---|---|------------|-----------|-----------|
| 48  | 1 | 0 | 10.061911  | -1.353336 | 0.753910  |
| 49  | 6 | 0 | 9.212098   | 0.194176  | -0.510245 |
| 50  | 1 | 0 | 9.336134   | 0.967523  | 0.259981  |
| 51  | 1 | 0 | 10.080126  | 0.265078  | -1.174135 |
| 52  | 6 | 0 | 7.929378   | 0.464229  | -1.297449 |
| 53  | 1 | 0 | 7.833035   | -0.254997 | -2.121372 |
| 54  | 1 | 0 | 7.946844   | 1.463068  | -1.747316 |
| 55  | 6 | 0 | 4.654139   | -2.016705 | 0.970026  |
| 56  | 1 | 0 | 4.759913   | -2.731802 | 0.137932  |
| 57  | 7 | 0 | -5.503860  | -0.542590 | -1.230947 |
| 58  | 7 | 0 | -5.500153  | 1.092009  | 1.163046  |
| 59  | 7 | 0 | -0.852372  | 5.488189  | 1.068434  |
| 60  | 7 | 0 | 1.306651   | 5.344691  | -0.844916 |
| 61  | 6 | 0 | -3.310480  | -1.238845 | -2.998545 |
| 62  | 1 | 0 | -3.907898  | -0.373821 | -3.275816 |
| 63  | 6 | 0 | -3.688759  | -1.991451 | -1.880756 |
| 64  | 6 | 0 | -4.855311  | -1.620760 | -1.060973 |
| 65  | 1 | 0 | -5.136578  | -2.347293 | -0.283312 |
| 66  | 6 | 0 | -6.685354  | -0.345567 | -0.407808 |
| 67  | 1 | 0 | -6.741192  | -1.100916 | 0.396017  |
| 68  | 6 | 0 | -6.631832  | 1.035030  | 0.257234  |
| 69  | 1 | 0 | -6.539678  | 1.786057  | -0.548927 |
| 70  | 6 | 0 | -7.918437  | 1.300044  | 1.047486  |
| 71  | 1 | 0 | -7.854232  | 2.294900  | 1.501385  |
| 72  | 1 | 0 | -7.970478  | 0.576485  | 1.871470  |
| 73  | 6 | 0 | -9.158074  | 1.179154  | 0.160700  |
| 74  | 1 | 0 | -10.061911 | 1.353336  | 0.753910  |
| 75  | 1 | 0 | -9.130251  | 1.958242  | -0.613252 |
| 76  | 6 | 0 | -9.212098  | -0.194176 | -0.510245 |
| 77  | 1 | 0 | -10.080126 | -0.265078 | -1.174135 |
| 78  | 1 | 0 | -9.336134  | -0.967523 | 0.259981  |
| 79  | 6 | 0 | -7.929378  | -0.464229 | -1.297449 |
| 80  | 1 | 0 | -7.833035  | 0.254997  | -2.121372 |
| 81  | 1 | 0 | -7.946844  | -1.463068 | -1.747316 |
| 82  | 6 | 0 | -4.654139  | 2.016705  | 0.970026  |
| 83  | 1 | 0 | -4.759913  | 2.731802  | 0.137932  |
| 84  | 6 | 0 | -3.477683  | 2.235873  | 1.830204  |
| 85  | 6 | 0 | -3.202886  | 1.414534  | 2.932588  |
| 86  | 1 | 0 | -3.870981  | 0.583266  | 3.144888  |
| 87  | 6 | 0 | -2.092076  | 1.665378  | 3.733199  |
| 88  | 6 | 0 | -1.248474  | 2.742103  | 3.428243  |
| 89  | 1 | 0 | -0.382464  | 2.917440  | 4.060870  |
| 90  | 6 | 0 | -1.516020  | 3.559785  | 2.338105  |
| 91  | 6 | 0 | -2.631834  | 3.298027  | 1.536351  |
| 92  | 1 | 0 | -2.817315  | 3.936991  | 0.677252  |
| 93  | 6 | 0 | -0.625477  | 4.694212  | 2.030879  |
| 94  | 1 | 0 | 0.250490   | 4.809284  | 2.690036  |
| 95  | 6 | 0 | 0.070481   | 6.583748  | 0.855322  |
| 96  | 1 | 0 | 0.965179   | 6.491934  | 1.498417  |
| 97  | 6 | 0 | 0.543637   | 6.556360  | -0.604095 |
| 98  | 1 | 0 | -0.353323  | 6.599533  | -1.246882 |
| 99  | 6 | 0 | 1.437616   | 7.766869  | -0.902538 |
| 100 | 1 | 0 | 1.744812   | 7.727535  | -1.953479 |
| 101 | 1 | 0 | 2.350802   | 7.677206  | -0.299603 |
| 102 | 6 | 0 | 0.725883   | 9.083049  | -0.587111 |
| 103 | 1 | 0 | -0.141126  | 9.196701  | -1.251946 |
| 104 | 1 | 0 | 1.394061   | 9.926709  | -0.789504 |
| 105 | 6 | 0 | 0.251220   | 9.109351  | 0.866629  |
| 106 | 1 | 0 | 1.124885   | 9.090217  | 1.532235  |

|     |   |   |           |            |           |
|-----|---|---|-----------|------------|-----------|
| 107 | 1 | 0 | -0.288740 | 10.038231  | 1.078171  |
| 108 | 6 | 0 | -0.641938 | 7.905321   | 1.165872  |
| 109 | 1 | 0 | -1.556335 | 7.952682   | 0.560155  |
| 110 | 1 | 0 | -0.955494 | 7.898108   | 2.215448  |
| 111 | 6 | 0 | 1.026357  | 4.661877   | -1.878492 |
| 112 | 1 | 0 | 0.194041  | 4.931802   | -2.546324 |
| 113 | 7 | 0 | -1.306651 | -5.344691  | -0.844916 |
| 114 | 7 | 0 | 0.852372  | -5.488189  | 1.068434  |
| 115 | 7 | 0 | 0.911848  | -1.118765  | 5.748793  |
| 116 | 7 | 0 | -0.911848 | 1.118765   | 5.748793  |
| 117 | 6 | 0 | -2.949382 | -3.114084  | -1.535011 |
| 118 | 1 | 0 | -3.238065 | -3.726041  | -0.684758 |
| 119 | 6 | 0 | -1.810927 | -3.473898  | -2.267523 |
| 120 | 6 | 0 | -1.026357 | -4.661877  | -1.878492 |
| 121 | 1 | 0 | -0.194041 | -4.931802  | -2.546324 |
| 122 | 6 | 0 | -0.543637 | -6.556360  | -0.604095 |
| 123 | 1 | 0 | 0.353323  | -6.599533  | -1.246882 |
| 124 | 6 | 0 | -0.070481 | -6.583748  | 0.855322  |
| 125 | 1 | 0 | -0.965179 | -6.491934  | 1.498417  |
| 126 | 6 | 0 | 0.641938  | -7.905321  | 1.165872  |
| 127 | 1 | 0 | 0.955494  | -7.898108  | 2.215448  |
| 128 | 1 | 0 | 1.556335  | -7.952682  | 0.560155  |
| 129 | 6 | 0 | -0.251220 | -9.109351  | 0.866629  |
| 130 | 1 | 0 | 0.288740  | -10.038231 | 1.078171  |
| 131 | 1 | 0 | -1.124885 | -9.090217  | 1.532235  |
| 132 | 6 | 0 | -0.725883 | -9.083049  | -0.587111 |
| 133 | 1 | 0 | -1.394061 | -9.926709  | -0.789504 |
| 134 | 1 | 0 | 0.141126  | -9.196701  | -1.251946 |
| 135 | 6 | 0 | -1.437616 | -7.766869  | -0.902538 |
| 136 | 1 | 0 | -2.350802 | -7.677206  | -0.299603 |
| 137 | 1 | 0 | -1.744812 | -7.727535  | -1.953479 |
| 138 | 6 | 0 | 0.625477  | -4.694212  | 2.030879  |
| 139 | 1 | 0 | -0.250490 | -4.809284  | 2.690036  |
| 140 | 6 | 0 | 1.516020  | -3.559785  | 2.338105  |
| 141 | 6 | 0 | 2.631834  | -3.298027  | 1.536351  |
| 142 | 1 | 0 | 2.817315  | -3.936991  | 0.677252  |
| 143 | 6 | 0 | 3.477683  | -2.235873  | 1.830204  |
| 144 | 6 | 0 | 3.202886  | -1.414534  | 2.932588  |
| 145 | 1 | 0 | 3.870981  | -0.583266  | 3.144888  |
| 146 | 6 | 0 | 2.092076  | -1.665378  | 3.733199  |
| 147 | 6 | 0 | 1.248474  | -2.742103  | 3.428243  |
| 148 | 1 | 0 | 0.382464  | -2.917440  | 4.060870  |
| 149 | 6 | 0 | 1.815376  | -0.818516  | 4.911562  |
| 150 | 1 | 0 | 2.449504  | 0.074184   | 5.026701  |
| 151 | 6 | 0 | 0.723837  | -0.259091  | 6.899219  |
| 152 | 1 | 0 | 1.390651  | 0.621426   | 6.864212  |
| 153 | 6 | 0 | -0.723837 | 0.259091   | 6.899219  |
| 154 | 1 | 0 | -1.390651 | -0.621426  | 6.864212  |
| 155 | 6 | 0 | -1.008833 | 1.066034   | 8.171131  |
| 156 | 1 | 0 | -2.050453 | 1.404549   | 8.148043  |
| 157 | 1 | 0 | -0.380996 | 1.966395   | 8.152090  |
| 158 | 6 | 0 | -0.721798 | 0.252782   | 9.433332  |
| 159 | 1 | 0 | -1.404885 | -0.606406  | 9.478330  |
| 160 | 1 | 0 | -0.917386 | 0.860896   | 10.322886 |
| 161 | 6 | 0 | 0.721798  | -0.252782  | 9.433332  |
| 162 | 1 | 0 | 1.404885  | 0.606406   | 9.478330  |
| 163 | 1 | 0 | 0.917386  | -0.860896  | 10.322886 |
| 164 | 6 | 0 | 1.008833  | -1.066034  | 8.171131  |
| 165 | 1 | 0 | 0.380996  | -1.966395  | 8.152090  |

|     |   |   |           |           |           |
|-----|---|---|-----------|-----------|-----------|
| 166 | 1 | 0 | 2.050453  | -1.404549 | 8.148043  |
| 167 | 6 | 0 | -1.815376 | 0.818516  | 4.911562  |
| 168 | 1 | 0 | -2.449504 | -0.074184 | 5.026701  |
| 169 | 6 | 0 | -2.328841 | 1.128886  | -1.223966 |
| 170 | 1 | 0 | -3.381617 | 0.924084  | -1.210245 |
| 171 | 6 | 0 | 2.328841  | -1.128886 | -1.223966 |
| 172 | 1 | 0 | 3.381617  | -0.924084 | -1.210245 |
| 173 | 6 | 0 | -1.139892 | 1.329247  | -1.233515 |
| 174 | 1 | 0 | -0.078795 | 1.475966  | -1.210264 |
| 175 | 6 | 0 | 1.139892  | -1.329247 | -1.233515 |
| 176 | 1 | 0 | 0.078795  | -1.475966 | -1.210264 |
| 177 | 6 | 0 | -1.403337 | -1.100713 | 1.217445  |
| 178 | 1 | 0 | -1.443874 | -0.040310 | 1.362857  |
| 179 | 6 | 0 | 1.403337  | 1.100713  | 1.217445  |
| 180 | 1 | 0 | 1.443874  | 0.040310  | 1.362857  |
| 181 | 6 | 0 | -1.346314 | -2.288301 | 1.016648  |
| 182 | 1 | 0 | -1.289882 | -3.337181 | 0.799829  |
| 183 | 6 | 0 | 1.346314  | 2.288301  | 1.016648  |
| 184 | 1 | 0 | 1.289882  | 3.337181  | 0.799829  |

(C2H2)6@CC3 C3 cc3-rjjcc

Standard orientation:

| Center<br>Number | Atomic<br>Number | Atomic<br>Type | Coordinates (Angstroms) |           |           |
|------------------|------------------|----------------|-------------------------|-----------|-----------|
|                  |                  |                | X                       | Y         | Z         |
| 1                | 7                | 0              | 3.218875                | -3.455566 | -3.341548 |
| 2                | 7                | 0              | 0.581660                | -4.895850 | -3.103891 |
| 3                | 7                | 0              | -4.602046               | -1.059844 | -3.341548 |
| 4                | 7                | 0              | -4.530760               | 1.944193  | -3.103891 |
| 5                | 6                | 0              | 4.014682                | -0.681407 | -2.864320 |
| 6                | 1                | 0              | 3.682422                | -0.925617 | -3.871017 |
| 7                | 6                | 0              | 4.131446                | -1.717223 | -1.922649 |
| 8                | 6                | 0              | 3.801174                | -3.119375 | -2.264142 |
| 9                | 1                | 0              | 4.077016                | -3.865221 | -1.501231 |
| 10               | 6                | 0              | 3.003354                | -4.874653 | -3.588170 |
| 11               | 1                | 0              | 3.120542                | -5.462355 | -2.660477 |
| 12               | 6                | 0              | 1.585381                | -5.140915 | -4.129076 |
| 13               | 1                | 0              | 1.433214                | -4.486327 | -5.006242 |
| 14               | 6                | 0              | 1.443457                | -6.608279 | -4.565874 |
| 15               | 1                | 0              | 0.435100                | -6.748947 | -4.970854 |
| 16               | 1                | 0              | 1.514106                | -7.237135 | -3.668339 |
| 17               | 6                | 0              | 2.505285                | -7.026085 | -5.580745 |
| 18               | 1                | 0              | 2.371979                | -8.079713 | -5.848514 |
| 19               | 1                | 0              | 2.380711                | -6.443539 | -6.503677 |
| 20               | 6                | 0              | 3.904043                | -6.783244 | -5.016961 |
| 21               | 1                | 0              | 4.671056                | -7.051181 | -5.751358 |
| 22               | 1                | 0              | 4.059340                | -7.429445 | -4.142373 |
| 23               | 6                | 0              | 4.064645                | -5.321216 | -4.606770 |
| 24               | 1                | 0              | 3.982482                | -4.672920 | -5.489344 |
| 25               | 1                | 0              | 5.054644                | -5.140439 | -4.173529 |
| 26               | 6                | 0              | -0.490767               | -4.314804 | -3.455432 |
| 27               | 1                | 0              | -0.642594               | -3.945670 | -4.482943 |
| 28               | 6                | 0              | -1.584135               | -4.018766 | -2.504513 |
| 29               | 6                | 0              | -1.540104               | -4.515957 | -1.195504 |
| 30               | 1                | 0              | -0.728470               | -5.187331 | -0.925566 |
| 31               | 6                | 0              | -2.482624               | -4.119451 | -0.253551 |
| 32               | 6                | 0              | -3.492308               | -3.219709 | -0.625265 |

|    |   |   |           |           |           |
|----|---|---|-----------|-----------|-----------|
| 33 | 1 | 0 | -4.209882 | -2.909262 | 0.129895  |
| 34 | 6 | 0 | -3.552882 | -2.719326 | -1.922649 |
| 35 | 6 | 0 | -2.597457 | -3.136113 | -2.864320 |
| 36 | 1 | 0 | -2.642819 | -2.726263 | -3.871017 |
| 37 | 6 | 0 | -4.602045 | -1.732226 | -2.264142 |
| 38 | 1 | 0 | -5.385888 | -1.598189 | -1.501231 |
| 39 | 6 | 0 | -5.723250 | -0.163654 | -3.588170 |
| 40 | 1 | 0 | -6.290809 | 0.028709  | -2.660477 |
| 41 | 6 | 0 | -5.244853 | 1.197477  | -4.129076 |
| 42 | 1 | 0 | -4.601880 | 1.001964  | -5.006242 |
| 43 | 6 | 0 | -6.444666 | 2.054069  | -4.565874 |
| 44 | 1 | 0 | -6.062310 | 2.997666  | -4.970854 |
| 45 | 1 | 0 | -7.024596 | 2.307313  | -3.668339 |
| 46 | 6 | 0 | -7.337411 | 1.343402  | -5.580745 |
| 47 | 1 | 0 | -6.770624 | 1.160013  | -6.503677 |
| 48 | 1 | 0 | -8.183226 | 1.985662  | -5.848514 |
| 49 | 6 | 0 | -7.826483 | 0.010622  | -5.016961 |
| 50 | 1 | 0 | -8.463758 | 0.199231  | -4.142373 |
| 51 | 1 | 0 | -8.442030 | -0.519663 | -5.751358 |
| 52 | 6 | 0 | -6.640631 | -0.859478 | -4.606770 |
| 53 | 1 | 0 | -6.038108 | -1.112470 | -5.489344 |
| 54 | 1 | 0 | -6.979072 | -1.807230 | -4.173529 |
| 55 | 6 | 0 | -3.491346 | 2.582419  | -3.455432 |
| 56 | 1 | 0 | -3.095753 | 2.529337  | -4.482943 |
| 57 | 7 | 0 | 5.328640  | -0.613216 | 2.049511  |
| 58 | 7 | 0 | 3.701586  | -0.139268 | 4.488654  |
| 59 | 7 | 0 | -1.971402 | -3.136034 | 4.488654  |
| 60 | 7 | 0 | -3.195381 | -4.308129 | 2.049511  |
| 61 | 6 | 0 | 4.534504  | -1.414573 | -0.625265 |
| 62 | 1 | 0 | 4.624436  | -2.191234 | 0.129895  |
| 63 | 6 | 0 | 4.808861  | -0.090290 | -0.253551 |
| 64 | 6 | 0 | 5.219163  | 0.248397  | 1.124393  |
| 65 | 1 | 0 | 5.445410  | 1.313553  | 1.296679  |
| 66 | 6 | 0 | 5.860467  | -0.158348 | 3.323574  |
| 67 | 1 | 0 | 5.837173  | 0.943850  | 3.399978  |
| 68 | 6 | 0 | 5.034134  | -0.720320 | 4.488674  |
| 69 | 1 | 0 | 4.992862  | -1.817713 | 4.371696  |
| 70 | 6 | 0 | 5.693215  | -0.378841 | 5.833556  |
| 71 | 1 | 0 | 5.088459  | -0.813953 | 6.636984  |
| 72 | 1 | 0 | 5.657738  | 0.710910  | 5.964257  |
| 73 | 6 | 0 | 7.138728  | -0.867402 | 5.908034  |
| 74 | 1 | 0 | 7.577618  | -0.591601 | 6.872827  |
| 75 | 1 | 0 | 7.158458  | -1.964163 | 5.850152  |
| 76 | 6 | 0 | 7.958744  | -0.288098 | 4.755829  |
| 77 | 1 | 0 | 8.987780  | -0.661656 | 4.786829  |
| 78 | 1 | 0 | 8.012429  | 0.803833  | 4.863319  |
| 79 | 6 | 0 | 7.317338  | -0.637983 | 3.414415  |
| 80 | 1 | 0 | 7.327704  | -1.725648 | 3.264461  |
| 81 | 1 | 0 | 7.879096  | -0.198753 | 2.582638  |
| 82 | 6 | 0 | 2.723908  | -0.922228 | 4.687789  |
| 83 | 1 | 0 | 2.857920  | -2.010552 | 4.786942  |
| 84 | 6 | 0 | 1.328018  | -0.441694 | 4.766913  |
| 85 | 6 | 0 | 1.037990  | 0.928594  | 4.770096  |
| 86 | 1 | 0 | 1.863073  | 1.636115  | 4.741668  |
| 87 | 6 | 0 | -0.281491 | 1.370944  | 4.766913  |
| 88 | 6 | 0 | -1.323181 | 0.434628  | 4.770096  |
| 89 | 1 | 0 | -2.348453 | 0.795411  | 4.741668  |
| 90 | 6 | 0 | -1.046527 | -0.929250 | 4.766913  |
| 91 | 6 | 0 | 0.285191  | -1.363222 | 4.770096  |

|     |   |   |           |           |           |
|-----|---|---|-----------|-----------|-----------|
| 92  | 1 | 0 | 0.485380  | -2.431526 | 4.741668  |
| 93  | 6 | 0 | -2.160627 | -1.897859 | 4.687789  |
| 94  | 1 | 0 | -3.170150 | -1.469755 | 4.786942  |
| 95  | 6 | 0 | -3.140882 | -3.999528 | 4.488674  |
| 96  | 1 | 0 | -4.070617 | -3.415089 | 4.371696  |
| 97  | 6 | 0 | -3.067366 | -4.996139 | 3.323574  |
| 98  | 1 | 0 | -2.101189 | -5.527065 | 3.399978  |
| 99  | 6 | 0 | -4.211178 | -6.018009 | 3.414415  |
| 100 | 1 | 0 | -4.111673 | -6.724121 | 2.582638  |
| 101 | 1 | 0 | -5.158307 | -5.483154 | 3.264461  |
| 102 | 6 | 0 | -4.228872 | -6.748426 | 4.755829  |
| 103 | 1 | 0 | -3.310074 | -7.340883 | 4.863319  |
| 104 | 1 | 0 | -5.066901 | -7.452818 | 4.786829  |
| 105 | 6 | 0 | -4.320556 | -5.748619 | 5.908034  |
| 106 | 1 | 0 | -5.280244 | -5.217324 | 5.850152  |
| 107 | 1 | 0 | -4.301151 | -6.266609 | 6.872827  |
| 108 | 6 | 0 | -3.174693 | -4.741048 | 5.833556  |
| 109 | 1 | 0 | -2.213203 | -5.255200 | 5.964257  |
| 110 | 1 | 0 | -3.249134 | -3.999758 | 6.636984  |
| 111 | 6 | 0 | -2.394463 | -4.644126 | 1.124393  |
| 112 | 1 | 0 | -1.585134 | -5.372640 | 1.296679  |
| 113 | 7 | 0 | 3.949101  | 2.951657  | -3.103891 |
| 114 | 7 | 0 | 1.383171  | 4.515410  | -3.341548 |
| 115 | 7 | 0 | -2.133259 | 4.921346  | 2.049511  |
| 116 | 7 | 0 | -1.730183 | 3.275301  | 4.488654  |
| 117 | 6 | 0 | 4.680986  | 0.924209  | -1.195504 |
| 118 | 1 | 0 | 4.856595  | 1.962792  | -0.925566 |
| 119 | 6 | 0 | 4.272421  | 0.637482  | -2.504513 |
| 120 | 6 | 0 | 3.982113  | 1.732385  | -3.455432 |
| 121 | 1 | 0 | 3.738347  | 1.416333  | -4.482943 |
| 122 | 6 | 0 | 3.659472  | 3.943437  | -4.129076 |
| 123 | 1 | 0 | 3.168666  | 3.484363  | -5.006242 |
| 124 | 6 | 0 | 2.719896  | 5.038307  | -3.588170 |
| 125 | 1 | 0 | 3.170267  | 5.433646  | -2.660477 |
| 126 | 6 | 0 | 2.575985  | 6.180694  | -4.606770 |
| 127 | 1 | 0 | 1.924429  | 6.947669  | -4.173529 |
| 128 | 1 | 0 | 2.055626  | 5.785390  | -5.489344 |
| 129 | 6 | 0 | 3.922440  | 6.772622  | -5.016961 |
| 130 | 1 | 0 | 3.770974  | 7.570843  | -5.751358 |
| 131 | 1 | 0 | 4.404418  | 7.230214  | -4.142373 |
| 132 | 6 | 0 | 4.832126  | 5.682683  | -5.580745 |
| 133 | 1 | 0 | 5.811247  | 6.094051  | -5.848514 |
| 134 | 1 | 0 | 4.389913  | 5.283525  | -6.503677 |
| 135 | 6 | 0 | 5.001209  | 4.554210  | -4.565874 |
| 136 | 1 | 0 | 5.510490  | 4.929822  | -3.668339 |
| 137 | 1 | 0 | 5.627210  | 3.751282  | -4.970854 |
| 138 | 6 | 0 | 0.800871  | 4.851601  | -2.264142 |
| 139 | 1 | 0 | 1.308871  | 5.463410  | -1.501231 |
| 140 | 6 | 0 | -0.578564 | 4.436549  | -1.922649 |
| 141 | 6 | 0 | -1.417226 | 3.817520  | -2.864320 |
| 142 | 1 | 0 | -1.039604 | 3.651880  | -3.871017 |
| 143 | 6 | 0 | -2.688286 | 3.381284  | -2.504513 |
| 144 | 6 | 0 | -3.140882 | 3.591748  | -1.195504 |
| 145 | 1 | 0 | -4.128126 | 3.224539  | -0.925566 |
| 146 | 6 | 0 | -2.326237 | 4.209741  | -0.253551 |
| 147 | 6 | 0 | -1.042196 | 4.634282  | -0.625265 |
| 148 | 1 | 0 | -0.414554 | 5.100496  | 0.129895  |
| 149 | 6 | 0 | -2.824700 | 4.395729  | 1.124393  |
| 150 | 1 | 0 | -3.860276 | 4.059087  | 1.296679  |

|     |   |   |           |           |           |
|-----|---|---|-----------|-----------|-----------|
| 151 | 6 | 0 | -2.793100 | 5.154487  | 3.323574  |
| 152 | 1 | 0 | -3.735985 | 4.583215  | 3.399978  |
| 153 | 6 | 0 | -1.893252 | 4.719848  | 4.488674  |
| 154 | 1 | 0 | -0.922246 | 5.232802  | 4.371696  |
| 155 | 6 | 0 | -2.518522 | 5.119889  | 5.833556  |
| 156 | 1 | 0 | -1.839326 | 4.813711  | 6.636984  |
| 157 | 1 | 0 | -3.444535 | 4.544290  | 5.964257  |
| 158 | 6 | 0 | -2.818172 | 6.616021  | 5.908034  |
| 159 | 1 | 0 | -1.878213 | 7.181488  | 5.850152  |
| 160 | 1 | 0 | -3.276467 | 6.858210  | 6.872827  |
| 161 | 6 | 0 | -3.729872 | 7.036524  | 4.755829  |
| 162 | 1 | 0 | -4.702354 | 6.537050  | 4.863319  |
| 163 | 1 | 0 | -3.920879 | 8.114474  | 4.786829  |
| 164 | 6 | 0 | -3.106160 | 6.655992  | 3.414415  |
| 165 | 1 | 0 | -2.169397 | 7.208802  | 3.264461  |
| 166 | 1 | 0 | -3.767423 | 6.922874  | 2.582638  |
| 167 | 6 | 0 | -0.563281 | 2.820087  | 4.687789  |
| 168 | 1 | 0 | 0.312229  | 3.480308  | 4.786942  |
| 169 | 6 | 0 | 1.225949  | 1.652112  | -2.189214 |
| 170 | 1 | 0 | 0.954557  | 2.298657  | -2.994388 |
| 171 | 6 | 0 | -2.655330 | -0.538522 | 1.186369  |
| 172 | 1 | 0 | -3.418132 | 0.006651  | 0.674588  |
| 173 | 6 | 0 | -1.755342 | -1.150962 | 1.703151  |
| 174 | 1 | 0 | -0.944914 | -1.689752 | 2.147744  |
| 175 | 6 | 0 | 1.874433  | -0.944690 | 1.703151  |
| 176 | 1 | 0 | 1.935825  | 0.026557  | 2.147744  |
| 177 | 6 | 0 | -0.119091 | 2.095651  | 1.703151  |
| 178 | 1 | 0 | -0.990911 | 1.663196  | 2.147744  |
| 179 | 6 | 0 | 0.861291  | 2.568844  | 1.186369  |
| 180 | 1 | 0 | 1.714826  | 2.956863  | 0.674588  |
| 181 | 6 | 0 | 1.794039  | -2.030322 | 1.186369  |
| 182 | 1 | 0 | 1.703306  | -2.963514 | 0.674588  |
| 183 | 6 | 0 | 1.555592  | 0.927486  | -1.286309 |
| 184 | 1 | 0 | 1.811604  | 0.230028  | -0.515686 |
| 185 | 6 | 0 | 0.025431  | -1.810925 | -1.286309 |
| 186 | 1 | 0 | -0.706592 | -1.683909 | -0.515686 |
| 187 | 6 | 0 | 0.817796  | -1.887759 | -2.189214 |
| 188 | 1 | 0 | 1.513417  | -1.975999 | -2.994388 |
| 189 | 6 | 0 | -1.581022 | 0.883439  | -1.286309 |
| 190 | 1 | 0 | -1.105012 | 1.453881  | -0.515686 |
| 191 | 6 | 0 | -2.043745 | 0.235647  | -2.189214 |
| 192 | 1 | 0 | -2.467973 | -0.322658 | -2.994388 |

-----  
(C2H2)4 S4 cc3-rjjccx

Standard orientation:

| Center<br>Number | Atomic<br>Number | Atomic<br>Type | Coordinates (Angstroms) |           |           |
|------------------|------------------|----------------|-------------------------|-----------|-----------|
|                  |                  |                | X                       | Y         | Z         |
| 1                | 6                | 0              | 1.607582                | 1.814760  | 1.563200  |
| 2                | 1                | 0              | 2.627703                | 2.002727  | 1.815147  |
| 3                | 6                | 0              | -1.607582               | -1.814760 | 1.563200  |
| 4                | 1                | 0              | -2.627703               | -2.002727 | 1.815147  |
| 5                | 6                | 0              | 0.453632                | 1.607582  | 1.289688  |
| 6                | 1                | 0              | -0.563790               | 1.408094  | 1.024559  |
| 7                | 6                | 0              | -0.453632               | -1.607582 | 1.289688  |
| 8                | 1                | 0              | 0.563790                | -1.408094 | 1.024559  |
| 9                | 6                | 0              | 1.607582                | -0.453632 | -1.289688 |



|    |   |   |           |           |           |
|----|---|---|-----------|-----------|-----------|
| 10 | 1 | 0 | 1.408094  | 0.563790  | -1.024559 |
| 11 | 6 | 0 | -1.607582 | 0.453632  | -1.289688 |
| 12 | 1 | 0 | -1.408094 | -0.563790 | -1.024559 |
| 13 | 6 | 0 | 1.814760  | -1.607582 | -1.563200 |
| 14 | 1 | 0 | 2.002727  | -2.627703 | -1.815147 |
| 15 | 6 | 0 | -1.814760 | 1.607582  | -1.563200 |
| 16 | 1 | 0 | -2.002727 | 2.627703  | -1.815147 |

(C2H2)4 C1 cc3-rjjccy

Standard orientation:

| Center<br>Number | Atomic<br>Number | Atomic<br>Type | Coordinates (Angstroms) |           |           |
|------------------|------------------|----------------|-------------------------|-----------|-----------|
|                  |                  |                | X                       | Y         | Z         |
| 1                | 6                | 0              | 1.658882                | 2.579814  | -0.053286 |
| 2                | 1                | 0              | 2.604485                | 3.069891  | -0.125239 |
| 3                | 6                | 0              | -1.144301               | -0.609072 | 2.091719  |
| 4                | 1                | 0              | -2.209304               | -0.545167 | 2.125376  |
| 5                | 6                | 0              | 0.584400                | 2.043404  | 0.033856  |
| 6                | 1                | 0              | -0.363124               | 1.547990  | 0.104979  |
| 7                | 6                | 0              | 0.055642                | -0.679748 | 2.035402  |
| 8                | 1                | 0              | 1.119502                | -0.744576 | 1.969960  |
| 9                | 6                | 0              | 1.685313                | -1.101598 | -0.911129 |
| 10               | 1                | 0              | 1.731603                | -0.030935 | -0.931083 |
| 11               | 6                | 0              | -1.781236               | -0.358582 | -1.064691 |
| 12               | 1                | 0              | -0.975176               | -1.039479 | -0.878840 |
| 13               | 6                | 0              | 1.613096                | -2.302682 | -0.867903 |
| 14               | 1                | 0              | 1.557563                | -3.368280 | -0.833780 |
| 15               | 6                | 0              | -2.671970               | 0.427335  | -1.261088 |
| 16               | 1                | 0              | -3.464506               | 1.117325  | -1.448656 |

(C2H2)6 C3 cc3rjjccx

Standard orientation:

| Center<br>Number | Atomic<br>Number | Atomic<br>Type | Coordinates (Angstroms) |           |           |
|------------------|------------------|----------------|-------------------------|-----------|-----------|
|                  |                  |                | X                       | Y         | Z         |
| 1                | 6                | 0              | 1.814865                | 1.994196  | 1.990290  |
| 2                | 1                | 0              | 2.656464                | 2.099838  | 2.638219  |
| 3                | 6                | 0              | -0.571952               | -2.560794 | -1.350152 |
| 4                | 1                | 0              | -0.064674               | -3.334952 | -0.816951 |
| 5                | 6                | 0              | -1.135056               | -1.663478 | -1.923263 |
| 6                | 1                | 0              | -1.624521               | -0.846281 | -2.408786 |
| 7                | 6                | 0              | -0.873086               | 1.814726  | -1.923263 |
| 8                | 1                | 0              | 0.079359                | 1.830017  | -2.408786 |
| 9                | 6                | 0              | 2.008142                | -0.151248 | -1.923263 |
| 10               | 1                | 0              | 1.545162                | -0.983736 | -2.408786 |
| 11               | 6                | 0              | 2.503688                | 0.785072  | -1.350152 |
| 12               | 1                | 0              | 2.920490                | 1.611467  | -0.816951 |
| 13               | 6                | 0              | -1.931736               | 1.775722  | -1.350152 |
| 14               | 1                | 0              | -2.855816               | 1.723485  | -0.816951 |
| 15               | 6                | 0              | 0.854641                | 1.869223  | 1.274596  |
| 16               | 1                | 0              | 0.000000                | 1.749757  | 0.638688  |
| 17               | 6                | 0              | -2.046115               | -0.194471 | 1.274596  |
| 18               | 1                | 0              | -1.515334               | -0.874879 | 0.638688  |
| 19               | 6                | 0              | -2.634457               | 0.574621  | 1.990290  |
| 20               | 1                | 0              | -3.146745               | 1.250646  | 2.638219  |

|    |   |   |          |           |          |
|----|---|---|----------|-----------|----------|
| 21 | 6 | 0 | 1.191474 | -1.674752 | 1.274596 |
| 22 | 1 | 0 | 1.515334 | -0.874879 | 0.638688 |
| 23 | 6 | 0 | 0.819592 | -2.568817 | 1.990290 |
| 24 | 1 | 0 | 0.490281 | -3.350484 | 2.638219 |

H2O@CC3 C1 cc3-ww00

Standard orientation:

| Center Number | Atomic Number | Atomic Type | Coordinates (Angstroms) |           |           |
|---------------|---------------|-------------|-------------------------|-----------|-----------|
|               |               |             | X                       | Y         | Z         |
| 1             | 7             | 0           | 1.628842                | 5.515960  | 0.523040  |
| 2             | 7             | 0           | 3.693742                | 4.328758  | -1.102923 |
| 3             | 7             | 0           | 5.565772                | -1.536577 | 0.714973  |
| 4             | 7             | 0           | 4.100945                | -3.195238 | 2.562507  |
| 5             | 6             | 0           | -0.222777               | 3.945606  | 2.073894  |
| 6             | 1             | 0           | 0.747078                | 4.165679  | 2.512711  |
| 7             | 6             | 0           | -0.479717               | 4.379926  | 0.765668  |
| 8             | 6             | 0           | 0.531077                | 5.144702  | 0.008999  |
| 9             | 1             | 0           | 0.260972                | 5.392765  | -1.029398 |
| 10            | 6             | 0           | 2.525485                | 6.305358  | -0.298617 |
| 11            | 1             | 0           | 2.134414                | 6.424025  | -1.325401 |
| 12            | 6             | 0           | 3.878451                | 5.584865  | -0.402578 |
| 13            | 1             | 0           | 4.246915                | 5.423605  | 0.626693  |
| 14            | 6             | 0           | 4.886529                | 6.443804  | -1.174118 |
| 15            | 1             | 0           | 5.842490                | 5.910856  | -1.220250 |
| 16            | 1             | 0           | 4.529035                | 6.547131  | -2.206925 |
| 17            | 6             | 0           | 5.055808                | 7.822696  | -0.535483 |
| 18            | 1             | 0           | 5.765611                | 8.420119  | -1.117280 |
| 19            | 1             | 0           | 5.484391                | 7.709208  | 0.469619  |
| 20            | 6             | 0           | 3.709001                | 8.540108  | -0.429449 |
| 21            | 1             | 0           | 3.828196                | 9.512533  | 0.059841  |
| 22            | 1             | 0           | 3.324549                | 8.737124  | -1.439499 |
| 23            | 6             | 0           | 2.700307                | 7.687532  | 0.340703  |
| 24            | 1             | 0           | 3.037511                | 7.546088  | 1.375805  |
| 25            | 1             | 0           | 1.723136                | 8.180279  | 0.389101  |
| 26            | 6             | 0           | 4.022025                | 3.263293  | -0.499424 |
| 27            | 1             | 0           | 4.423395                | 3.274687  | 0.525955  |
| 28            | 6             | 0           | 3.917783                | 1.932028  | -1.128912 |
| 29            | 6             | 0           | 3.350790                | 1.780584  | -2.402179 |
| 30            | 1             | 0           | 2.971749                | 2.663959  | -2.909704 |
| 31            | 6             | 0           | 3.291416                | 0.529024  | -3.002526 |
| 32            | 6             | 0           | 3.799098                | -0.588021 | -2.323885 |
| 33            | 1             | 0           | 3.751265                | -1.557946 | -2.812262 |
| 34            | 6             | 0           | 4.364090                | -0.448815 | -1.062434 |
| 35            | 6             | 0           | 4.417909                | 0.818646  | -0.465703 |
| 36            | 1             | 0           | 4.869672                | 0.909369  | 0.518764  |
| 37            | 6             | 0           | 4.933063                | -1.627848 | -0.379795 |
| 38            | 1             | 0           | 4.790366                | -2.591966 | -0.892360 |
| 39            | 6             | 0           | 6.119532                | -2.750850 | 1.280812  |
| 40            | 1             | 0           | 5.859253                | -3.636302 | 0.672967  |
| 41            | 6             | 0           | 5.527159                | -2.965552 | 2.682430  |
| 42            | 1             | 0           | 5.743159                | -2.058327 | 3.275309  |
| 43            | 6             | 0           | 6.172639                | -4.180608 | 3.358261  |
| 44            | 1             | 0           | 5.740708                | -4.299394 | 4.357923  |
| 45            | 1             | 0           | 5.899825                | -5.076085 | 2.784815  |
| 46            | 6             | 0           | 7.693823                | -4.044362 | 3.428791  |
| 47            | 1             | 0           | 7.954675                | -3.188891 | 4.066696  |

|     |   |   |           |           |           |
|-----|---|---|-----------|-----------|-----------|
| 48  | 1 | 0 | 8.127938  | -4.933680 | 3.897666  |
| 49  | 6 | 0 | 8.283543  | -3.829337 | 2.033950  |
| 50  | 1 | 0 | 8.103587  | -4.725104 | 1.423995  |
| 51  | 1 | 0 | 9.369137  | -3.697226 | 2.090893  |
| 52  | 6 | 0 | 7.644492  | -2.616525 | 1.356841  |
| 53  | 1 | 0 | 7.880129  | -1.702957 | 1.918110  |
| 54  | 1 | 0 | 8.037940  | -2.477902 | 0.343929  |
| 55  | 6 | 0 | 3.319702  | -2.406531 | 3.174836  |
| 56  | 1 | 0 | 3.695079  | -1.561783 | 3.773255  |
| 57  | 7 | 0 | -4.331442 | 3.569162  | -0.860019 |
| 58  | 7 | 0 | -4.922330 | 1.220811  | -2.403402 |
| 59  | 7 | 0 | 0.006351  | -1.362309 | -5.603622 |
| 60  | 7 | 0 | 2.749441  | -0.696372 | -5.002676 |
| 61  | 6 | 0 | -1.714512 | 4.115878  | 0.187061  |
| 62  | 1 | 0 | -1.941007 | 4.444590  | -0.823961 |
| 63  | 6 | 0 | -2.704885 | 3.430413  | 0.904977  |
| 64  | 6 | 0 | -4.030189 | 3.171566  | 0.307657  |
| 65  | 1 | 0 | -4.740749 | 2.610665  | 0.931983  |
| 66  | 6 | 0 | -5.670956 | 3.282239  | -1.338007 |
| 67  | 1 | 0 | -6.232956 | 2.661383  | -0.618000 |
| 68  | 6 | 0 | -5.570349 | 2.497488  | -2.654775 |
| 69  | 1 | 0 | -4.981153 | 3.103547  | -3.364677 |
| 70  | 6 | 0 | -6.965921 | 2.244531  | -3.236036 |
| 71  | 1 | 0 | -6.864831 | 1.689095  | -4.174924 |
| 72  | 1 | 0 | -7.518515 | 1.599646  | -2.540030 |
| 73  | 6 | 0 | -7.722855 | 3.556037  | -3.451687 |
| 74  | 1 | 0 | -8.722873 | 3.348568  | -3.846427 |
| 75  | 1 | 0 | -7.200217 | 4.157058  | -4.208267 |
| 76  | 6 | 0 | -7.813365 | 4.354138  | -2.149590 |
| 77  | 1 | 0 | -8.321651 | 5.308950  | -2.319946 |
| 78  | 1 | 0 | -8.420086 | 3.794924  | -1.424761 |
| 79  | 6 | 0 | -6.422280 | 4.598783  | -1.563682 |
| 80  | 1 | 0 | -5.827920 | 5.223074  | -2.243805 |
| 81  | 1 | 0 | -6.485523 | 5.135661  | -0.611179 |
| 82  | 6 | 0 | -3.931989 | 0.892920  | -3.126734 |
| 83  | 1 | 0 | -3.553306 | 1.568083  | -3.908262 |
| 84  | 6 | 0 | -3.228050 | -0.397201 | -3.005222 |
| 85  | 6 | 0 | -3.635390 | -1.374620 | -2.084068 |
| 86  | 1 | 0 | -4.475966 | -1.179721 | -1.422924 |
| 87  | 6 | 0 | -2.971598 | -2.593301 | -2.014980 |
| 88  | 6 | 0 | -1.884884 | -2.841171 | -2.864714 |
| 89  | 1 | 0 | -1.382712 | -3.802945 | -2.797722 |
| 90  | 6 | 0 | -1.472772 | -1.879892 | -3.779311 |
| 91  | 6 | 0 | -2.152386 | -0.656136 | -3.846970 |
| 92  | 1 | 0 | -1.820707 | 0.079808  | -4.574869 |
| 93  | 6 | 0 | -0.342993 | -2.164733 | -4.686679 |
| 94  | 1 | 0 | 0.168783  | -3.126094 | -4.525345 |
| 95  | 6 | 0 | 1.109171  | -1.751181 | -6.460773 |
| 96  | 1 | 0 | 1.540608  | -2.719986 | -6.150444 |
| 97  | 6 | 0 | 2.221746  | -0.697056 | -6.353201 |
| 98  | 1 | 0 | 1.777971  | 0.280592  | -6.615033 |
| 99  | 6 | 0 | 3.359530  | -1.015606 | -7.330183 |
| 100 | 1 | 0 | 4.128758  | -0.240922 | -7.239937 |
| 101 | 1 | 0 | 3.822284  | -1.961641 | -7.020280 |
| 102 | 6 | 0 | 2.853782  | -1.123541 | -8.768885 |
| 103 | 1 | 0 | 2.462465  | -0.149415 | -9.092498 |
| 104 | 1 | 0 | 3.683335  | -1.370773 | -9.439625 |
| 105 | 6 | 0 | 1.744968  | -2.171539 | -8.876004 |
| 106 | 1 | 0 | 2.160193  | -3.161536 | -8.643082 |

|     |   |   |           |           |           |
|-----|---|---|-----------|-----------|-----------|
| 107 | 1 | 0 | 1.360004  | -2.221940 | -9.899933 |
| 108 | 6 | 0 | 0.606522  | -1.856685 | -7.904965 |
| 109 | 1 | 0 | 0.134160  | -0.902788 | -8.173608 |
| 110 | 1 | 0 | -0.174904 | -2.622936 | -7.952124 |
| 111 | 6 | 0 | 2.730233  | 0.397335  | -4.361629 |
| 112 | 1 | 0 | 2.311734  | 1.319141  | -4.795237 |
| 113 | 7 | 0 | -1.799687 | 2.301783  | 4.914419  |
| 114 | 7 | 0 | -0.709130 | -0.265503 | 5.660266  |
| 115 | 7 | 0 | -1.951386 | -5.123454 | 1.636829  |
| 116 | 7 | 0 | -2.963502 | -4.793668 | -1.044311 |
| 117 | 6 | 0 | -2.440853 | 3.006832  | 2.201657  |
| 118 | 1 | 0 | -3.194352 | 2.481745  | 2.783658  |
| 119 | 6 | 0 | -1.195210 | 3.262316  | 2.793209  |
| 120 | 6 | 0 | -0.918561 | 2.843635  | 4.181763  |
| 121 | 1 | 0 | 0.099373  | 3.048677  | 4.548406  |
| 122 | 6 | 0 | -1.437128 | 1.972173  | 6.278780  |
| 123 | 1 | 0 | -0.374663 | 2.198722  | 6.481561  |
| 124 | 6 | 0 | -1.636338 | 0.465193  | 6.502471  |
| 125 | 1 | 0 | -2.685640 | 0.228644  | 6.249644  |
| 126 | 6 | 0 | -1.372506 | 0.100309  | 7.967986  |
| 127 | 1 | 0 | -1.536288 | -0.974914 | 8.098741  |
| 128 | 1 | 0 | -0.312720 | 0.289807  | 8.182950  |
| 129 | 6 | 0 | -2.255184 | 0.910593  | 8.917708  |
| 130 | 1 | 0 | -2.032218 | 0.642559  | 9.955817  |
| 131 | 1 | 0 | -3.309356 | 0.656184  | 8.742581  |
| 132 | 6 | 0 | -2.056707 | 2.410777  | 8.694934  |
| 133 | 1 | 0 | -2.715155 | 2.988169  | 9.352413  |
| 134 | 1 | 0 | -1.025491 | 2.681753  | 8.959541  |
| 135 | 6 | 0 | -2.321103 | 2.780362  | 7.235208  |
| 136 | 1 | 0 | -3.370514 | 2.583799  | 6.979999  |
| 137 | 1 | 0 | -2.145991 | 3.847566  | 7.060753  |
| 138 | 6 | 0 | -1.190432 | -1.105340 | 4.841454  |
| 139 | 1 | 0 | -2.274662 | -1.274785 | 4.750083  |
| 140 | 6 | 0 | -0.337578 | -1.937425 | 3.969295  |
| 141 | 6 | 0 | 1.053532  | -1.762719 | 3.947523  |
| 142 | 1 | 0 | 1.488833  | -0.987585 | 4.573018  |
| 143 | 6 | 0 | 1.853213  | -2.575577 | 3.154005  |
| 144 | 6 | 0 | 1.259304  | -3.571784 | 2.366457  |
| 145 | 1 | 0 | 1.901407  | -4.202767 | 1.757323  |
| 146 | 6 | 0 | -0.117662 | -3.753681 | 2.380422  |
| 147 | 6 | 0 | -0.915644 | -2.928235 | 3.185330  |
| 148 | 1 | 0 | -1.990565 | -3.090328 | 3.189892  |
| 149 | 6 | 0 | -0.718236 | -4.836114 | 1.576095  |
| 150 | 1 | 0 | -0.020704 | -5.394736 | 0.932513  |
| 151 | 6 | 0 | -2.426679 | -6.236511 | 0.838621  |
| 152 | 1 | 0 | -1.620749 | -6.658015 | 0.210824  |
| 153 | 6 | 0 | -3.533234 | -5.740296 | -0.104635 |
| 154 | 1 | 0 | -4.313981 | -5.270281 | 0.519787  |
| 155 | 6 | 0 | -4.141615 | -6.911127 | -0.884668 |
| 156 | 1 | 0 | -4.935301 | -6.527601 | -1.534946 |
| 157 | 1 | 0 | -3.365057 | -7.326655 | -1.540051 |
| 158 | 6 | 0 | -4.674267 | -7.995400 | 0.052653  |
| 159 | 1 | 0 | -5.500733 | -7.587561 | 0.650351  |
| 160 | 1 | 0 | -5.084607 | -8.826032 | -0.531209 |
| 161 | 6 | 0 | -3.571968 | -8.489982 | 0.990550  |
| 162 | 1 | 0 | -2.787416 | -8.980804 | 0.398583  |
| 163 | 1 | 0 | -3.964397 | -9.242200 | 1.682926  |
| 164 | 6 | 0 | -2.964672 | -7.325690 | 1.773537  |
| 165 | 1 | 0 | -3.722536 | -6.873146 | 2.426123  |

|     |   |   |           |           |           |
|-----|---|---|-----------|-----------|-----------|
| 166 | 1 | 0 | -2.150433 | -7.668128 | 2.421437  |
| 167 | 6 | 0 | -3.446987 | -3.622007 | -1.067390 |
| 168 | 1 | 0 | -4.262434 | -3.310296 | -0.396568 |
| 169 | 8 | 0 | -5.422682 | 0.213702  | 0.272491  |
| 170 | 1 | 0 | -5.365740 | 0.519288  | -0.656467 |
| 171 | 1 | 0 | -4.498902 | 0.209738  | 0.560888  |

6H2O@CC3 C1 cc3-www

Standard orientation:

| Center<br>Number | Atomic<br>Number | Atomic<br>Type | Coordinates (Angstroms) |           |           |
|------------------|------------------|----------------|-------------------------|-----------|-----------|
|                  |                  |                | X                       | Y         | Z         |
| 1                | 7                | 0              | 5.561838                | -1.703164 | -0.231233 |
| 2                | 7                | 0              | 3.891668                | -3.830719 | 0.660922  |
| 3                | 7                | 0              | -1.702228               | -5.115738 | -2.236811 |
| 4                | 7                | 0              | -3.016957               | -3.092595 | -3.802126 |
| 5                | 6                | 0              | 4.375951                | 0.583268  | -1.479426 |
| 6                | 1                | 0              | 4.536553                | -0.304435 | -2.085488 |
| 7                | 6                | 0              | 4.797461                | 0.571800  | -0.141078 |
| 8                | 6                | 0              | 5.408490                | -0.637179 | 0.439864  |
| 9                | 1                | 0              | 5.690844                | -0.572589 | 1.503665  |
| 10               | 6                | 0              | 6.122065                | -2.856997 | 0.442039  |
| 11               | 1                | 0              | 6.141592                | -2.711695 | 1.537668  |
| 12               | 6                | 0              | 5.231343                | -4.068488 | 0.145552  |
| 13               | 1                | 0              | 5.212245                | -4.208212 | -0.949474 |
| 14               | 6                | 0              | 5.813364                | -5.328331 | 0.797681  |
| 15               | 1                | 0              | 5.164433                | -6.180122 | 0.565456  |
| 16               | 1                | 0              | 5.791993                | -5.197889 | 1.887667  |
| 17               | 6                | 0              | 7.244341                | -5.585451 | 0.321432  |
| 18               | 1                | 0              | 7.649839                | -6.473090 | 0.818039  |
| 19               | 1                | 0              | 7.233407                | -5.800643 | -0.755626 |
| 20               | 6                | 0              | 8.138185                | -4.370917 | 0.581704  |
| 21               | 1                | 0              | 9.147396                | -4.548666 | 0.196022  |
| 22               | 1                | 0              | 8.233969                | -4.218799 | 1.665335  |
| 23               | 6                | 0              | 7.549140                | -3.110685 | -0.054795 |
| 24               | 1                | 0              | 7.522711                | -3.212288 | -1.147557 |
| 25               | 1                | 0              | 8.164620                | -2.232609 | 0.169575  |
| 26               | 6                | 0              | 2.917771                | -4.211496 | -0.062855 |
| 27               | 1                | 0              | 3.078634                | -4.637993 | -1.065328 |
| 28               | 6                | 0              | 1.513805                | -4.138782 | 0.380067  |
| 29               | 6                | 0              | 1.193857                | -3.818420 | 1.707800  |
| 30               | 1                | 0              | 2.001437                | -3.602793 | 2.403362  |
| 31               | 6                | 0              | -0.129658               | -3.794994 | 2.126835  |
| 32               | 6                | 0              | -1.148386               | -4.077280 | 1.206676  |
| 33               | 1                | 0              | -2.178089               | -4.059658 | 1.554301  |
| 34               | 6                | 0              | -0.842900               | -4.391046 | -0.111452 |
| 35               | 6                | 0              | 0.497289                | -4.427417 | -0.521308 |
| 36               | 1                | 0              | 0.718243                | -4.684293 | -1.553970 |
| 37               | 6                | 0              | -1.929705               | -4.711905 | -1.057057 |
| 38               | 1                | 0              | -2.952959               | -4.589774 | -0.668902 |
| 39               | 6                | 0              | -2.839726               | -5.409920 | -3.084767 |
| 40               | 1                | 0              | -3.795001               | -5.253585 | -2.551639 |
| 41               | 6                | 0              | -2.819829               | -4.445942 | -4.283735 |
| 42               | 1                | 0              | -1.839199               | -4.560984 | -4.779538 |
| 43               | 6                | 0              | -3.936946               | -4.793512 | -5.273180 |
| 44               | 1                | 0              | -3.886248               | -4.101904 | -6.121029 |
| 45               | 1                | 0              | -4.899919               | -4.617993 | -4.776173 |

|     |   |   |           |           |           |
|-----|---|---|-----------|-----------|-----------|
| 46  | 6 | 0 | -3.844467 | -6.246288 | -5.740987 |
| 47  | 1 | 0 | -2.910257 | -6.391635 | -6.300437 |
| 48  | 1 | 0 | -4.665080 | -6.470480 | -6.430618 |
| 49  | 6 | 0 | -3.868922 | -7.202081 | -4.547088 |
| 50  | 1 | 0 | -4.840548 | -7.122452 | -4.040623 |
| 51  | 1 | 0 | -3.770280 | -8.239944 | -4.882321 |
| 52  | 6 | 0 | -2.751399 | -6.863630 | -3.560178 |
| 53  | 1 | 0 | -1.772293 | -7.008642 | -4.034941 |
| 54  | 1 | 0 | -2.782663 | -7.524303 | -2.686959 |
| 55  | 6 | 0 | -2.070697 | -2.263343 | -3.962500 |
| 56  | 1 | 0 | -1.121112 | -2.543916 | -4.442416 |
| 57  | 7 | 0 | 3.508827  | 3.798725  | 2.287929  |
| 58  | 7 | 0 | 0.963850  | 4.113239  | 3.593832  |
| 59  | 7 | 0 | -2.295467 | -1.181626 | 5.142850  |
| 60  | 7 | 0 | -1.596174 | -3.755677 | 4.025588  |
| 61  | 6 | 0 | 4.558971  | 1.677389  | 0.662992  |
| 62  | 1 | 0 | 4.842482  | 1.677183  | 1.712805  |
| 63  | 6 | 0 | 3.901725  | 2.800987  | 0.141681  |
| 64  | 6 | 0 | 3.530337  | 3.921616  | 1.023177  |
| 65  | 1 | 0 | 3.248147  | 4.861620  | 0.525290  |
| 66  | 6 | 0 | 3.178770  | 4.976840  | 3.072061  |
| 67  | 1 | 0 | 2.689384  | 5.745153  | 2.448348  |
| 68  | 6 | 0 | 2.201322  | 4.583764  | 4.185247  |
| 69  | 1 | 0 | 2.685474  | 3.793082  | 4.787747  |
| 70  | 6 | 0 | 1.900714  | 5.787264  | 5.085675  |
| 71  | 1 | 0 | 1.208736  | 5.474057  | 5.874907  |
| 72  | 1 | 0 | 1.379116  | 6.544331  | 4.485814  |
| 73  | 6 | 0 | 3.182092  | 6.373787  | 5.679261  |
| 74  | 1 | 0 | 2.943420  | 7.244417  | 6.298960  |
| 75  | 1 | 0 | 3.650326  | 5.631682  | 6.340117  |
| 76  | 6 | 0 | 4.168312  | 6.756522  | 4.574237  |
| 77  | 1 | 0 | 5.099282  | 7.139408  | 5.005243  |
| 78  | 1 | 0 | 3.738480  | 7.568514  | 3.972221  |
| 79  | 6 | 0 | 4.465409  | 5.559695  | 3.669597  |
| 80  | 1 | 0 | 4.970379  | 4.769465  | 4.240801  |
| 81  | 1 | 0 | 5.138347  | 5.842113  | 2.852273  |
| 82  | 6 | 0 | 0.526478  | 2.981825  | 3.967895  |
| 83  | 1 | 0 | 1.077768  | 2.359014  | 4.692075  |
| 84  | 6 | 0 | -0.755698 | 2.423514  | 3.501894  |
| 85  | 6 | 0 | -1.560380 | 3.119222  | 2.586482  |
| 86  | 1 | 0 | -1.207371 | 4.071175  | 2.198263  |
| 87  | 6 | 0 | -2.795430 | 2.606652  | 2.211572  |
| 88  | 6 | 0 | -3.219119 | 1.372939  | 2.728951  |
| 89  | 1 | 0 | -4.190167 | 0.990574  | 2.424774  |
| 90  | 6 | 0 | -2.422803 | 0.672031  | 3.623120  |
| 91  | 6 | 0 | -1.186779 | 1.205995  | 4.010606  |
| 92  | 1 | 0 | -0.575899 | 0.638986  | 4.707357  |
| 93  | 6 | 0 | -2.890416 | -0.610936 | 4.180556  |
| 94  | 1 | 0 | -3.801744 | -1.029875 | 3.725784  |
| 95  | 6 | 0 | -2.842654 | -2.426522 | 5.641023  |
| 96  | 1 | 0 | -3.750364 | -2.725435 | 5.085798  |
| 97  | 6 | 0 | -1.796705 | -3.536091 | 5.444554  |
| 98  | 1 | 0 | -0.867428 | -3.200259 | 5.939037  |
| 99  | 6 | 0 | -2.270950 | -4.847024 | 6.081337  |
| 100 | 1 | 0 | -1.496119 | -5.608521 | 5.940431  |
| 101 | 1 | 0 | -3.157568 | -5.190675 | 5.532731  |
| 102 | 6 | 0 | -2.606658 | -4.669963 | 7.562098  |
| 103 | 1 | 0 | -1.697068 | -4.395612 | 8.113758  |
| 104 | 1 | 0 | -2.958874 | -5.617977 | 7.982378  |

|     |   |   |           |           |           |
|-----|---|---|-----------|-----------|-----------|
| 105 | 6 | 0 | -3.657093 | -3.574243 | 7.749347  |
| 106 | 1 | 0 | -4.595280 | -3.888491 | 7.271858  |
| 107 | 1 | 0 | -3.875890 | -3.426959 | 8.812284  |
| 108 | 6 | 0 | -3.182916 | -2.261410 | 7.126444  |
| 109 | 1 | 0 | -2.283561 | -1.902410 | 7.643621  |
| 110 | 1 | 0 | -3.942144 | -1.478460 | 7.229462  |
| 111 | 6 | 0 | -0.447227 | -3.524770 | 3.543803  |
| 112 | 1 | 0 | 0.384474  | -3.150988 | 4.159681  |
| 113 | 7 | 0 | 3.093633  | 2.823021  | -4.013894 |
| 114 | 7 | 0 | 0.450859  | 2.117459  | -5.027516 |
| 115 | 7 | 0 | -4.885323 | 2.673343  | -1.687948 |
| 116 | 7 | 0 | -4.888655 | 3.067405  | 1.127384  |
| 117 | 6 | 0 | 3.529510  | 2.823041  | -1.195050 |
| 118 | 1 | 0 | 3.010765  | 3.676689  | -1.622377 |
| 119 | 6 | 0 | 3.763735  | 1.707907  | -2.012230 |
| 120 | 6 | 0 | 3.372794  | 1.730751  | -3.436151 |
| 121 | 1 | 0 | 3.366174  | 0.761814  | -3.955919 |
| 122 | 6 | 0 | 2.757108  | 2.794481  | -5.421961 |
| 123 | 1 | 0 | 2.883242  | 1.786060  | -5.854796 |
| 124 | 6 | 0 | 1.276186  | 3.176530  | -5.574447 |
| 125 | 1 | 0 | 1.125825  | 4.131639  | -5.040174 |
| 126 | 6 | 0 | 0.906263  | 3.348622  | -7.053099 |
| 127 | 1 | 0 | -0.144887 | 3.649842  | -7.119053 |
| 128 | 1 | 0 | 0.985747  | 2.366578  | -7.537090 |
| 129 | 6 | 0 | 1.814067  | 4.353786  | -7.760676 |
| 130 | 1 | 0 | 1.529350  | 4.436613  | -8.815005 |
| 131 | 1 | 0 | 1.679764  | 5.348989  | -7.315154 |
| 132 | 6 | 0 | 3.279336  | 3.937369  | -7.627814 |
| 133 | 1 | 0 | 3.934953  | 4.667650  | -8.113953 |
| 134 | 1 | 0 | 3.430892  | 2.979450  | -8.144004 |
| 135 | 6 | 0 | 3.660468  | 3.792085  | -6.155328 |
| 136 | 1 | 0 | 3.572315  | 4.761864  | -5.648527 |
| 137 | 1 | 0 | 4.702073  | 3.470961  | -6.045398 |
| 138 | 6 | 0 | -0.304205 | 2.388964  | -4.046101 |
| 139 | 1 | 0 | -0.326539 | 3.378000  | -3.567322 |
| 140 | 6 | 0 | -1.287592 | 1.401144  | -3.551152 |
| 141 | 6 | 0 | -1.173559 | 0.044164  | -3.884718 |
| 142 | 1 | 0 | -0.285325 | -0.287440 | -4.414065 |
| 143 | 6 | 0 | -2.182493 | -0.850899 | -3.546659 |
| 144 | 6 | 0 | -3.317409 | -0.391065 | -2.859177 |
| 145 | 1 | 0 | -4.107160 | -1.101078 | -2.625153 |
| 146 | 6 | 0 | -3.429648 | 0.951115  | -2.509712 |
| 147 | 6 | 0 | -2.401595 | 1.843483  | -2.849841 |
| 148 | 1 | 0 | -2.510951 | 2.890195  | -2.578472 |
| 149 | 6 | 0 | -4.641138 | 1.436766  | -1.819743 |
| 150 | 1 | 0 | -5.324004 | 0.661552  | -1.437870 |
| 151 | 6 | 0 | -6.088318 | 3.060088  | -0.980912 |
| 152 | 1 | 0 | -6.641514 | 2.179266  | -0.607386 |
| 153 | 6 | 0 | -5.675293 | 3.899681  | 0.240105  |
| 154 | 1 | 0 | -5.088723 | 4.756650  | -0.137645 |
| 155 | 6 | 0 | -6.912382 | 4.415223  | 0.980604  |
| 156 | 1 | 0 | -6.589317 | 5.016939  | 1.836992  |
| 157 | 1 | 0 | -7.455725 | 3.551163  | 1.384661  |
| 158 | 6 | 0 | -7.821342 | 5.222664  | 0.052539  |
| 159 | 1 | 0 | -7.290678 | 6.123746  | -0.284073 |
| 160 | 1 | 0 | -8.708027 | 5.562323  | 0.598134  |
| 161 | 6 | 0 | -8.227552 | 4.394132  | -1.167848 |
| 162 | 1 | 0 | -8.839689 | 3.543525  | -0.838241 |
| 163 | 1 | 0 | -8.849276 | 4.988111  | -1.846026 |

|     |   |   |           |           |           |
|-----|---|---|-----------|-----------|-----------|
| 164 | 6 | 0 | -6.994707 | 3.874521  | -1.909131 |
| 165 | 1 | 0 | -6.411429 | 4.714090  | -2.308977 |
| 166 | 1 | 0 | -7.282128 | 3.250787  | -2.762597 |
| 167 | 6 | 0 | -3.674857 | 3.383173  | 1.316229  |
| 168 | 1 | 0 | -3.219940 | 4.266025  | 0.841046  |
| 169 | 1 | 0 | 1.188671  | 0.651231  | -1.851205 |
| 170 | 8 | 0 | 1.212595  | -0.319879 | -2.007301 |
| 171 | 1 | 0 | 1.767182  | -0.672285 | -1.280464 |
| 172 | 8 | 0 | 0.492466  | 2.189985  | -1.038794 |
| 173 | 1 | 0 | -0.331673 | 1.691856  | -0.874242 |
| 174 | 1 | 0 | 0.963536  | 2.095332  | -0.184158 |
| 175 | 8 | 0 | -1.019792 | -0.123768 | -0.483795 |
| 176 | 1 | 0 | -0.285133 | -0.408929 | -1.087222 |
| 177 | 1 | 0 | -1.838284 | -0.361736 | -0.943406 |
| 178 | 1 | 0 | 2.460185  | -0.238433 | 0.793210  |
| 179 | 8 | 0 | 2.270200  | -1.140251 | 0.456588  |
| 180 | 1 | 0 | 3.055804  | -1.693901 | 0.603141  |
| 181 | 8 | 0 | 1.644305  | 1.343926  | 1.397813  |
| 182 | 1 | 0 | 0.937174  | 0.803783  | 1.837613  |
| 183 | 1 | 0 | 2.003445  | 1.980664  | 2.037703  |
| 184 | 8 | 0 | -0.002321 | -0.669532 | 2.027436  |
| 185 | 1 | 0 | 0.685594  | -1.215309 | 1.598010  |
| 186 | 1 | 0 | -0.626259 | -0.514188 | 1.285729  |

8H2O@CC3 C1 cc3-wwb

Standard orientation:

| Center<br>Number | Atomic<br>Number | Atomic<br>Type | Coordinates (Angstroms) |           |          |
|------------------|------------------|----------------|-------------------------|-----------|----------|
|                  |                  |                | X                       | Y         | Z        |
| 1                | 7                | 0              | -2.683837               | 2.996077  | 3.919922 |
| 2                | 7                | 0              | -1.090388               | 1.151047  | 5.543500 |
| 3                | 7                | 0              | 4.711501                | -0.034454 | 2.912240 |
| 4                | 7                | 0              | 5.736173                | 0.679279  | 0.260922 |
| 5                | 6                | 0              | -2.507554               | 3.891957  | 1.175761 |
| 6                | 1                | 0              | -1.858365               | 4.397297  | 1.886918 |
| 7                | 6                | 0              | -3.487274               | 3.006655  | 1.650717 |
| 8                | 6                | 0              | -3.610214               | 2.723289  | 3.092635 |
| 9                | 1                | 0              | -4.548464               | 2.245378  | 3.414632 |
| 10               | 6                | 0              | -2.936187               | 2.749773  | 5.334268 |
| 11               | 1                | 0              | -3.629036               | 1.901632  | 5.465633 |
| 12               | 6                | 0              | -1.620449               | 2.405617  | 6.044886 |
| 13               | 1                | 0              | -0.920311               | 3.241310  | 5.859190 |
| 14               | 6                | 0              | -1.845535               | 2.267866  | 7.556374 |
| 15               | 1                | 0              | -0.886274               | 2.037259  | 8.032197 |
| 16               | 1                | 0              | -2.500877               | 1.403694  | 7.727564 |
| 17               | 6                | 0              | -2.468039               | 3.527794  | 8.156742 |
| 18               | 1                | 0              | -2.633158               | 3.389731  | 9.230434 |
| 19               | 1                | 0              | -1.769769               | 4.368630  | 8.047147 |
| 20               | 6                | 0              | -3.780701               | 3.868712  | 7.451021 |
| 21               | 1                | 0              | -4.209004               | 4.791935  | 7.855237 |
| 22               | 1                | 0              | -4.510298               | 3.069287  | 7.638818 |
| 23               | 6                | 0              | -3.563070               | 4.011850  | 5.944889 |
| 24               | 1                | 0              | -2.896781               | 4.860291  | 5.739038 |
| 25               | 1                | 0              | -4.508147               | 4.218561  | 5.429633 |
| 26               | 6                | 0              | 0.120423                | 1.135977  | 5.162027 |
| 27               | 1                | 0              | 0.738532                | 2.048041  | 5.158121 |
| 28               | 6                | 0              | 0.796647                | -0.089081 | 4.692317 |



|    |   |   |           |           |           |
|----|---|---|-----------|-----------|-----------|
| 29 | 6 | 0 | 0.120446  | -1.315625 | 4.663868  |
| 30 | 1 | 0 | -0.911891 | -1.345542 | 5.003858  |
| 31 | 6 | 0 | 0.744465  | -2.456606 | 4.174808  |
| 32 | 6 | 0 | 2.075583  | -2.383906 | 3.748632  |
| 33 | 1 | 0 | 2.550414  | -3.286282 | 3.371621  |
| 34 | 6 | 0 | 2.755568  | -1.171782 | 3.764553  |
| 35 | 6 | 0 | 2.109371  | -0.021039 | 4.238390  |
| 36 | 1 | 0 | 2.646037  | 0.925005  | 4.233906  |
| 37 | 6 | 0 | 4.137713  | -1.116803 | 3.255232  |
| 38 | 1 | 0 | 4.657425  | -2.085448 | 3.183631  |
| 39 | 6 | 0 | 6.120307  | -0.118675 | 2.541229  |
| 40 | 1 | 0 | 6.352001  | -1.107131 | 2.109359  |
| 41 | 6 | 0 | 6.455802  | 0.947963  | 1.491649  |
| 42 | 1 | 0 | 6.171710  | 1.927979  | 1.918332  |
| 43 | 6 | 0 | 7.959083  | 0.951269  | 1.186857  |
| 44 | 1 | 0 | 8.162953  | 1.730989  | 0.445081  |
| 45 | 1 | 0 | 8.215482  | -0.008000 | 0.718216  |
| 46 | 6 | 0 | 8.794981  | 1.160527  | 2.448904  |
| 47 | 1 | 0 | 8.585112  | 2.154836  | 2.865993  |
| 48 | 1 | 0 | 9.861448  | 1.138524  | 2.201177  |
| 49 | 6 | 0 | 8.464355  | 0.095822  | 3.495052  |
| 50 | 1 | 0 | 8.761405  | -0.890299 | 3.112909  |
| 51 | 1 | 0 | 9.034892  | 0.265877  | 4.414247  |
| 52 | 6 | 0 | 6.967674  | 0.088213  | 3.805562  |
| 53 | 1 | 0 | 6.672489  | 1.041423  | 4.264305  |
| 54 | 1 | 0 | 6.720777  | -0.700084 | 4.525953  |
| 55 | 6 | 0 | 5.032141  | 1.619216  | -0.220001 |
| 56 | 1 | 0 | 4.931789  | 2.589310  | 0.293056  |
| 57 | 7 | 0 | -5.724101 | 0.823570  | -1.230024 |
| 58 | 7 | 0 | -4.911238 | -1.790218 | -2.344573 |
| 59 | 7 | 0 | -1.100859 | -5.618018 | 1.174884  |
| 60 | 7 | 0 | 0.453070  | -4.759125 | 3.519118  |
| 61 | 6 | 0 | -4.316494 | 2.352435  | 0.748699  |
| 62 | 1 | 0 | -5.066486 | 1.643213  | 1.089067  |
| 63 | 6 | 0 | -4.158676 | 2.547204  | -0.628741 |
| 64 | 6 | 0 | -4.934847 | 1.746516  | -1.594292 |
| 65 | 1 | 0 | -4.769075 | 1.985972  | -2.656511 |
| 66 | 6 | 0 | -6.459608 | 0.114015  | -2.259647 |
| 67 | 1 | 0 | -6.093916 | 0.370154  | -3.270418 |
| 68 | 6 | 0 | -6.284739 | -1.400837 | -2.072771 |
| 69 | 1 | 0 | -6.575058 | -1.642955 | -1.034730 |
| 70 | 6 | 0 | -7.187285 | -2.174445 | -3.045058 |
| 71 | 1 | 0 | -7.054083 | -3.247025 | -2.865717 |
| 72 | 1 | 0 | -6.835794 | -1.977182 | -4.066326 |
| 73 | 6 | 0 | -8.655427 | -1.772846 | -2.910555 |
| 74 | 1 | 0 | -9.262882 | -2.332480 | -3.629691 |
| 75 | 1 | 0 | -9.018739 | -2.040938 | -1.909118 |
| 76 | 6 | 0 | -8.820640 | -0.267608 | -3.119070 |
| 77 | 1 | 0 | -9.867753 | 0.027675  | -2.993780 |
| 78 | 1 | 0 | -8.538089 | -0.012062 | -4.149404 |
| 79 | 6 | 0 | -7.938913 | 0.506674  | -2.140842 |
| 80 | 1 | 0 | -8.261127 | 0.311553  | -1.109477 |
| 81 | 1 | 0 | -8.025805 | 1.587016  | -2.300868 |
| 82 | 6 | 0 | -4.328374 | -2.524570 | -1.491072 |
| 83 | 1 | 0 | -4.809110 | -2.809621 | -0.542235 |
| 84 | 6 | 0 | -2.981011 | -3.092215 | -1.715204 |
| 85 | 6 | 0 | -2.267371 | -2.812638 | -2.889717 |
| 86 | 1 | 0 | -2.715628 | -2.145284 | -3.621106 |
| 87 | 6 | 0 | -1.011526 | -3.369695 | -3.106173 |

|     |   |   |           |           |           |
|-----|---|---|-----------|-----------|-----------|
| 88  | 6 | 0 | -0.461180 | -4.226749 | -2.138983 |
| 89  | 1 | 0 | 0.522949  | -4.650935 | -2.322297 |
| 90  | 6 | 0 | -1.154328 | -4.501596 | -0.961555 |
| 91  | 6 | 0 | -2.421389 | -3.931518 | -0.758257 |
| 92  | 1 | 0 | -2.944660 | -4.153309 | 0.168121  |
| 93  | 6 | 0 | -0.535202 | -5.362975 | 0.069478  |
| 94  | 1 | 0 | 0.454234  | -5.772452 | -0.187900 |
| 95  | 6 | 0 | -0.426777 | -6.533369 | 2.079894  |
| 96  | 1 | 0 | 0.616339  | -6.714726 | 1.764557  |
| 97  | 6 | 0 | -0.386511 | -5.943031 | 3.497650  |
| 98  | 1 | 0 | -1.425901 | -5.706603 | 3.789205  |
| 99  | 6 | 0 | 0.194907  | -6.962642 | 4.486734  |
| 100 | 1 | 0 | 0.192457  | -6.517101 | 5.487605  |
| 101 | 1 | 0 | 1.245405  | -7.137452 | 4.219363  |
| 102 | 6 | 0 | -0.577299 | -8.281242 | 4.470214  |
| 103 | 1 | 0 | -1.606844 | -8.106566 | 4.811169  |
| 104 | 1 | 0 | -0.125375 | -8.988991 | 5.173181  |
| 105 | 6 | 0 | -0.608080 | -8.868533 | 3.059085  |
| 106 | 1 | 0 | 0.414583  | -9.127592 | 2.752939  |
| 107 | 1 | 0 | -1.190480 | -9.795767 | 3.038931  |
| 108 | 6 | 0 | -1.195630 | -7.862141 | 2.070385  |
| 109 | 1 | 0 | -2.243366 | -7.653127 | 2.323488  |
| 110 | 1 | 0 | -1.189130 | -8.262594 | 1.050566  |
| 111 | 6 | 0 | -0.021213 | -3.712645 | 4.057455  |
| 112 | 1 | 0 | -1.047945 | -3.680231 | 4.455667  |
| 113 | 7 | 0 | -1.003896 | 5.132871  | -1.892866 |
| 114 | 7 | 0 | 1.724496  | 4.622069  | -2.831200 |
| 115 | 7 | 0 | 2.774311  | -1.315129 | -5.099011 |
| 116 | 7 | 0 | 0.877232  | -3.514755 | -4.599651 |
| 117 | 6 | 0 | -3.201918 | 3.441874  | -1.087833 |
| 118 | 1 | 0 | -3.072990 | 3.616300  | -2.153757 |
| 119 | 6 | 0 | -2.362654 | 4.115227  | -0.187606 |
| 120 | 6 | 0 | -1.330951 | 5.056010  | -0.666890 |
| 121 | 1 | 0 | -0.857684 | 5.685213  | 0.100665  |
| 122 | 6 | 0 | -0.065578 | 6.180469  | -2.271728 |
| 123 | 1 | 0 | 0.551414  | 6.485522  | -1.409753 |
| 124 | 6 | 0 | 0.878723  | 5.670324  | -3.366730 |
| 125 | 1 | 0 | 0.254354  | 5.301749  | -4.201996 |
| 126 | 6 | 0 | 1.778610  | 6.804836  | -3.874893 |
| 127 | 1 | 0 | 2.425400  | 6.409346  | -4.665672 |
| 128 | 1 | 0 | 2.435775  | 7.113448  | -3.051369 |
| 129 | 6 | 0 | 0.965609  | 7.998442  | -4.374499 |
| 130 | 1 | 0 | 1.637409  | 8.794919  | -4.711480 |
| 131 | 1 | 0 | 0.367852  | 7.695849  | -5.245086 |
| 132 | 6 | 0 | 0.032559  | 8.510073  | -3.276839 |
| 133 | 1 | 0 | -0.575482 | 9.343908  | -3.643438 |
| 134 | 1 | 0 | 0.633840  | 8.895843  | -2.442483 |
| 135 | 6 | 0 | -0.873028 | 7.387029  | -2.772237 |
| 136 | 1 | 0 | -1.535723 | 7.046438  | -3.579139 |
| 137 | 1 | 0 | -1.518225 | 7.738026  | -1.958859 |
| 138 | 6 | 0 | 1.828775  | 3.544327  | -3.491718 |
| 139 | 1 | 0 | 1.265445  | 3.374484  | -4.423914 |
| 140 | 6 | 0 | 2.709115  | 2.439568  | -3.065963 |
| 141 | 6 | 0 | 3.461344  | 2.543779  | -1.887606 |
| 142 | 1 | 0 | 3.368358  | 3.447236  | -1.289260 |
| 143 | 6 | 0 | 4.281648  | 1.496979  | -1.483621 |
| 144 | 6 | 0 | 4.341921  | 0.327747  | -2.253213 |
| 145 | 1 | 0 | 4.965296  | -0.491998 | -1.905007 |
| 146 | 6 | 0 | 3.572249  | 0.201662  | -3.402663 |

|     |   |   |           |           |           |
|-----|---|---|-----------|-----------|-----------|
| 147 | 6 | 0 | 2.768803  | 1.271823  | -3.817360 |
| 148 | 1 | 0 | 2.167388  | 1.153394  | -4.715228 |
| 149 | 6 | 0 | 3.544996  | -1.088296 | -4.117102 |
| 150 | 1 | 0 | 4.228235  | -1.859369 | -3.726720 |
| 151 | 6 | 0 | 2.861963  | -2.617179 | -5.734118 |
| 152 | 1 | 0 | 3.457173  | -3.324421 | -5.128481 |
| 153 | 6 | 0 | 1.455581  | -3.213249 | -5.898223 |
| 154 | 1 | 0 | 0.845943  | -2.473485 | -6.447470 |
| 155 | 6 | 0 | 1.511112  | -4.520281 | -6.701158 |
| 156 | 1 | 0 | 0.491695  | -4.905664 | -6.813640 |
| 157 | 1 | 0 | 2.067297  | -5.260143 | -6.110646 |
| 158 | 6 | 0 | 2.178957  | -4.327815 | -8.062077 |
| 159 | 1 | 0 | 1.575285  | -3.642614 | -8.672699 |
| 160 | 1 | 0 | 2.216806  | -5.282036 | -8.598215 |
| 161 | 6 | 0 | 3.582851  | -3.747013 | -7.893231 |
| 162 | 1 | 0 | 4.211879  | -4.472185 | -7.359142 |
| 163 | 1 | 0 | 4.050938  | -3.577713 | -8.868758 |
| 164 | 6 | 0 | 3.531244  | -2.439312 | -7.104341 |
| 165 | 1 | 0 | 2.965297  | -1.683475 | -7.664705 |
| 166 | 1 | 0 | 4.536508  | -2.032102 | -6.949808 |
| 167 | 6 | 0 | -0.277120 | -3.053973 | -4.350669 |
| 168 | 1 | 0 | -0.809370 | -2.399971 | -5.058574 |
| 169 | 8 | 0 | 0.567516  | -0.604832 | 1.777580  |
| 170 | 8 | 0 | -0.618301 | 1.770113  | 2.255008  |
| 171 | 8 | 0 | -1.810734 | 0.917402  | -0.129341 |
| 172 | 8 | 0 | -0.492274 | -1.381144 | -0.543263 |
| 173 | 8 | 0 | 2.496740  | 1.055887  | 1.145718  |
| 174 | 8 | 0 | 0.939960  | 3.278262  | 0.707281  |
| 175 | 8 | 0 | -0.150344 | 2.286821  | -1.637983 |
| 176 | 8 | 0 | 1.455688  | 0.113124  | -1.281544 |
| 177 | 1 | 0 | -0.040520 | 0.083939  | 2.109970  |
| 178 | 1 | 0 | 0.125703  | -1.041792 | 1.017301  |
| 179 | 1 | 0 | -1.578870 | -0.022598 | -0.274953 |
| 180 | 1 | 0 | -1.514979 | 1.149525  | 0.776747  |
| 181 | 1 | 0 | 1.689371  | 2.666981  | 0.882656  |
| 182 | 1 | 0 | 0.635502  | 3.024807  | -0.194125 |
| 183 | 1 | 0 | 1.056367  | 0.932216  | -1.637023 |
| 184 | 1 | 0 | 2.005538  | 0.400711  | -0.523372 |
| 185 | 1 | 0 | -1.121713 | 2.270366  | 2.923569  |
| 186 | 1 | 0 | -0.461660 | -2.281803 | -0.890005 |
| 187 | 1 | 0 | 3.302537  | 0.854196  | 1.656080  |
| 188 | 1 | 0 | -0.523834 | 3.064946  | -2.085534 |
| 189 | 1 | 0 | -0.065721 | 2.421445  | 1.737933  |
| 190 | 1 | 0 | 0.287042  | -0.873505 | -0.930652 |
| 191 | 1 | 0 | -0.885644 | 1.816746  | -1.145375 |
| 192 | 1 | 0 | 1.802271  | 0.399462  | 1.450158  |

12H2O@CC3 C3 cc3-wwc

Standard orientation:

| Center<br>Number | Atomic<br>Number | Atomic<br>Type | Coordinates (Angstroms) |          |           |
|------------------|------------------|----------------|-------------------------|----------|-----------|
|                  |                  |                | X                       | Y        | Z         |
| 1                | 7                | 0              | 3.397787                | 3.317239 | -3.137994 |
| 2                | 7                | 0              | 0.859426                | 4.677077 | -3.520945 |
| 3                | 7                | 0              | -2.450218               | 4.591520 | 2.001494  |
| 4                | 7                | 0              | -1.940556               | 3.164413 | 4.495605  |
| 5                | 6                | 0              | 4.326052                | 1.358917 | -1.183914 |

|    |   |   |           |           |           |
|----|---|---|-----------|-----------|-----------|
| 6  | 1 | 0 | 4.394073  | 2.400060  | -0.879940 |
| 7  | 6 | 0 | 3.941958  | 1.048334  | -2.497280 |
| 8  | 6 | 0 | 3.596125  | 2.104472  | -3.465226 |
| 9  | 1 | 0 | 3.519478  | 1.778895  | -4.514020 |
| 10 | 6 | 0 | 3.162780  | 4.271371  | -4.215334 |
| 11 | 1 | 0 | 2.764948  | 3.758209  | -5.107374 |
| 12 | 6 | 0 | 2.133372  | 5.321662  | -3.778981 |
| 13 | 1 | 0 | 2.526671  | 5.811653  | -2.868861 |
| 14 | 6 | 0 | 1.951753  | 6.378375  | -4.875104 |
| 15 | 1 | 0 | 1.218933  | 7.116635  | -4.531922 |
| 16 | 1 | 0 | 1.520505  | 5.887812  | -5.757742 |
| 17 | 6 | 0 | 3.277377  | 7.047753  | -5.237891 |
| 18 | 1 | 0 | 3.121967  | 7.781507  | -6.035721 |
| 19 | 1 | 0 | 3.657154  | 7.599535  | -4.367351 |
| 20 | 6 | 0 | 4.312146  | 6.004918  | -5.662870 |
| 21 | 1 | 0 | 5.272860  | 6.482038  | -5.882991 |
| 22 | 1 | 0 | 3.976941  | 5.520590  | -6.590100 |
| 23 | 6 | 0 | 4.494110  | 4.944243  | -4.576593 |
| 24 | 1 | 0 | 4.908617  | 5.400346  | -3.667746 |
| 25 | 1 | 0 | 5.203140  | 4.172468  | -4.897027 |
| 26 | 6 | 0 | 0.315953  | 4.901366  | -2.396177 |
| 27 | 1 | 0 | 0.791328  | 5.535335  | -1.634011 |
| 28 | 6 | 0 | -0.968744 | 4.292680  | -2.001342 |
| 29 | 6 | 0 | -1.705428 | 3.513426  | -2.901091 |
| 30 | 1 | 0 | -1.326571 | 3.392707  | -3.912900 |
| 31 | 6 | 0 | -2.878863 | 2.889669  | -2.497280 |
| 32 | 6 | 0 | -3.339883 | 3.067012  | -1.183914 |
| 33 | 1 | 0 | -4.275549 | 2.605349  | -0.879940 |
| 34 | 6 | 0 | -2.618029 | 3.839516  | -0.282604 |
| 35 | 6 | 0 | -1.427185 | 4.452772  | -0.700868 |
| 36 | 1 | 0 | -0.866572 | 5.056006  | 0.009053  |
| 37 | 6 | 0 | -3.138604 | 4.043842  | 1.084353  |
| 38 | 1 | 0 | -4.172307 | 3.710765  | 1.259419  |
| 39 | 6 | 0 | -3.123921 | 4.887883  | 3.259104  |
| 40 | 1 | 0 | -4.027843 | 4.266438  | 3.375813  |
| 41 | 6 | 0 | -2.194967 | 4.588651  | 4.442297  |
| 42 | 1 | 0 | -1.263066 | 5.164503  | 4.286869  |
| 43 | 6 | 0 | -2.843924 | 5.026328  | 5.760823  |
| 44 | 1 | 0 | -2.149348 | 4.811624  | 6.580063  |
| 45 | 1 | 0 | -3.732782 | 4.403582  | 5.926266  |
| 46 | 6 | 0 | -3.233198 | 6.504011  | 5.740907  |
| 47 | 1 | 0 | -2.328597 | 7.120263  | 5.647280  |
| 48 | 1 | 0 | -3.709094 | 6.780199  | 6.687761  |
| 49 | 6 | 0 | -4.165802 | 6.797870  | 4.565385  |
| 50 | 1 | 0 | -5.107576 | 6.250337  | 4.706355  |
| 51 | 1 | 0 | -4.419083 | 7.862750  | 4.528831  |
| 52 | 6 | 0 | -3.523672 | 6.370441  | 3.245594  |
| 53 | 1 | 0 | -2.622095 | 6.967725  | 3.054733  |
| 54 | 1 | 0 | -4.203575 | 6.543394  | 2.403608  |
| 55 | 6 | 0 | -0.734113 | 2.775178  | 4.473430  |
| 56 | 1 | 0 | 0.108792  | 3.482835  | 4.406383  |
| 57 | 7 | 0 | 3.620754  | -3.082823 | -3.520945 |
| 58 | 7 | 0 | 1.173920  | -4.601189 | -3.137994 |
| 59 | 7 | 0 | -4.480180 | -1.594254 | -3.520945 |
| 60 | 7 | 0 | -4.571707 | 1.283950  | -3.137994 |
| 61 | 6 | 0 | 3.895430  | -0.279769 | -2.901091 |
| 62 | 1 | 0 | 3.601456  | -0.547509 | -3.912900 |
| 63 | 6 | 0 | 4.201942  | -1.307383 | -2.001342 |
| 64 | 6 | 0 | 4.086731  | -2.724306 | -2.396177 |

|     |   |   |           |           |           |
|-----|---|---|-----------|-----------|-----------|
| 65  | 1 | 0 | 4.398077  | -3.452978 | -1.634011 |
| 66  | 6 | 0 | 3.542008  | -4.508385 | -3.778981 |
| 67  | 1 | 0 | 3.769704  | -5.093988 | -2.868861 |
| 68  | 6 | 0 | 2.117726  | -4.874733 | -4.215334 |
| 69  | 1 | 0 | 1.872230  | -4.273620 | -5.107374 |
| 70  | 6 | 0 | 2.034785  | -6.364135 | -4.576593 |
| 71  | 1 | 0 | 1.011893  | -6.592285 | -4.897027 |
| 72  | 1 | 0 | 2.222528  | -6.951160 | -3.667746 |
| 73  | 6 | 0 | 3.044339  | -6.736887 | -5.662870 |
| 74  | 1 | 0 | 2.977180  | -7.807450 | -5.882991 |
| 75  | 1 | 0 | 2.792501  | -6.204427 | -6.590100 |
| 76  | 6 | 0 | 4.464845  | -6.362168 | -5.237891 |
| 77  | 1 | 0 | 5.177999  | -6.594456 | -6.035721 |
| 78  | 1 | 0 | 4.752813  | -6.966956 | -4.367351 |
| 79  | 6 | 0 | 4.547958  | -4.879455 | -4.875104 |
| 80  | 1 | 0 | 4.338742  | -4.260702 | -5.757742 |
| 81  | 1 | 0 | 5.553720  | -4.613944 | -4.531922 |
| 82  | 6 | 0 | 0.024464  | -4.166572 | -3.465226 |
| 83  | 1 | 0 | -0.219171 | -3.937405 | -4.514020 |
| 84  | 6 | 0 | -1.063095 | -3.938003 | -2.497280 |
| 85  | 6 | 0 | -0.986169 | -4.425929 | -1.183914 |
| 86  | 1 | 0 | -0.118524 | -5.005409 | -0.879940 |
| 87  | 6 | 0 | -2.016104 | -4.187038 | -0.282604 |
| 88  | 6 | 0 | -3.142621 | -3.462364 | -0.700868 |
| 89  | 1 | 0 | -3.945344 | -3.278476 | 0.009053  |
| 90  | 6 | 0 | -3.233198 | -2.985297 | -2.001342 |
| 91  | 6 | 0 | -2.190002 | -3.233657 | -2.901091 |
| 92  | 1 | 0 | -2.274885 | -2.845198 | -3.912900 |
| 93  | 6 | 0 | -4.402684 | -2.177060 | -2.396177 |
| 94  | 1 | 0 | -5.189405 | -2.082357 | -1.634011 |
| 95  | 6 | 0 | -5.675380 | -0.813277 | -3.778981 |
| 96  | 1 | 0 | -6.296375 | -0.717665 | -2.868861 |
| 97  | 6 | 0 | -5.280506 | 0.603362  | -4.215334 |
| 98  | 1 | 0 | -4.637178 | 0.515411  | -5.107374 |
| 99  | 6 | 0 | -6.528895 | 1.419892  | -4.576593 |
| 100 | 1 | 0 | -6.215033 | 2.419817  | -4.897027 |
| 101 | 1 | 0 | -7.131145 | 1.550814  | -3.667746 |
| 102 | 6 | 0 | -7.356485 | 0.731969  | -5.662870 |
| 103 | 1 | 0 | -6.769442 | 0.683837  | -6.590100 |
| 104 | 1 | 0 | -8.250040 | 1.325412  | -5.882991 |
| 105 | 6 | 0 | -7.742222 | -0.685585 | -5.237891 |
| 106 | 1 | 0 | -8.409967 | -0.632579 | -4.367351 |
| 107 | 1 | 0 | -8.299966 | -1.187051 | -6.035721 |
| 108 | 6 | 0 | -6.499711 | -1.498920 | -4.875104 |
| 109 | 1 | 0 | -5.859247 | -1.627110 | -5.757742 |
| 110 | 1 | 0 | -6.772653 | -2.502691 | -4.531922 |
| 111 | 6 | 0 | -3.620589 | 2.062100  | -3.465226 |
| 112 | 1 | 0 | -3.300307 | 2.158510  | -4.514020 |
| 113 | 7 | 0 | 5.201482  | -0.173809 | 2.001494  |
| 114 | 7 | 0 | 3.710740  | 0.098364  | 4.495605  |
| 115 | 7 | 0 | -1.770184 | -3.262777 | 4.495605  |
| 116 | 7 | 0 | -2.751264 | -4.417711 | 2.001494  |
| 117 | 6 | 0 | 4.569806  | -0.990408 | -0.700868 |
| 118 | 1 | 0 | 4.811916  | -1.777530 | 0.009053  |
| 119 | 6 | 0 | 4.634133  | 0.347522  | -0.282604 |
| 120 | 6 | 0 | 5.071372  | 0.696190  | 1.084353  |
| 121 | 1 | 0 | 5.299770  | 1.757941  | 1.259419  |
| 122 | 6 | 0 | 5.794991  | 0.261453  | 3.259104  |
| 123 | 1 | 0 | 5.708765  | 1.354995  | 3.375813  |

|     |   |   |           |           |           |
|-----|---|---|-----------|-----------|-----------|
| 124 | 6 | 0 | 5.071372  | -0.393428 | 4.442297  |
| 125 | 1 | 0 | 5.104124  | -1.488404 | 4.286869  |
| 126 | 6 | 0 | 5.774890  | -0.050254 | 5.760823  |
| 127 | 1 | 0 | 5.241663  | -0.544422 | 6.580063  |
| 128 | 1 | 0 | 5.680005  | 1.030893  | 5.926266  |
| 129 | 6 | 0 | 7.249238  | -0.451974 | 5.740907  |
| 130 | 1 | 0 | 7.726372  | -0.177930 | 6.687761  |
| 131 | 1 | 0 | 7.330627  | -1.543507 | 5.647280  |
| 132 | 6 | 0 | 7.970029  | 0.208755  | 4.565385  |
| 133 | 1 | 0 | 9.018883  | -0.104337 | 4.528831  |
| 134 | 1 | 0 | 7.966739  | 1.298122  | 4.706355  |
| 135 | 6 | 0 | 7.278800  | -0.133631 | 3.245594  |
| 136 | 1 | 0 | 7.345274  | -1.213062 | 3.054733  |
| 137 | 1 | 0 | 7.768533  | 0.368706  | 2.403608  |
| 138 | 6 | 0 | 2.770431  | -0.751828 | 4.473430  |
| 139 | 1 | 0 | 2.961828  | -1.835634 | 4.406383  |
| 140 | 6 | 0 | 1.348144  | -0.359248 | 4.514872  |
| 141 | 6 | 0 | 0.980297  | 0.992434  | 4.515016  |
| 142 | 1 | 0 | 1.762323  | 1.746174  | 4.476353  |
| 143 | 6 | 0 | -0.362954 | 1.347151  | 4.514872  |
| 144 | 6 | 0 | -1.349622 | 0.352745  | 4.515016  |
| 145 | 1 | 0 | -2.393393 | 0.653129  | 4.476353  |
| 146 | 6 | 0 | -0.985190 | -0.987903 | 4.514872  |
| 147 | 6 | 0 | 0.369325  | -1.345179 | 4.515016  |
| 148 | 1 | 0 | 0.631070  | -2.399303 | 4.476353  |
| 149 | 6 | 0 | -2.036318 | -2.023350 | 4.473430  |
| 150 | 1 | 0 | -3.070620 | -1.647201 | 4.406383  |
| 151 | 6 | 0 | -2.876405 | -4.195223 | 4.442297  |
| 152 | 1 | 0 | -3.841058 | -3.676099 | 4.286869  |
| 153 | 6 | 0 | -2.671070 | -5.149336 | 3.259104  |
| 154 | 1 | 0 | -1.680922 | -5.621433 | 3.375813  |
| 155 | 6 | 0 | -3.755128 | -6.236810 | 3.245594  |
| 156 | 1 | 0 | -3.564958 | -6.912100 | 2.403608  |
| 157 | 1 | 0 | -4.723179 | -5.754663 | 3.054733  |
| 158 | 6 | 0 | -3.804227 | -7.006625 | 4.565385  |
| 159 | 1 | 0 | -2.859163 | -7.548459 | 4.706355  |
| 160 | 1 | 0 | -4.599800 | -7.758413 | 4.528831  |
| 161 | 6 | 0 | -4.016040 | -6.052037 | 5.740907  |
| 162 | 1 | 0 | -5.002030 | -5.576756 | 5.647280  |
| 163 | 1 | 0 | -4.017278 | -6.602269 | 6.687761  |
| 164 | 6 | 0 | -2.930966 | -4.976074 | 5.760823  |
| 165 | 1 | 0 | -1.947223 | -5.434475 | 5.926266  |
| 166 | 1 | 0 | -3.092315 | -4.267202 | 6.580063  |
| 167 | 6 | 0 | -1.932768 | -4.740032 | 1.084353  |
| 168 | 1 | 0 | -1.127463 | -5.468706 | 1.259419  |
| 169 | 8 | 0 | -0.411828 | 1.522896  | -0.930563 |
| 170 | 8 | 0 | 1.806981  | 3.135006  | -0.668514 |
| 171 | 8 | 0 | 1.524781  | -0.404794 | -0.930563 |
| 172 | 8 | 0 | 1.811504  | -3.132394 | -0.668514 |
| 173 | 8 | 0 | -1.112953 | -1.118102 | -0.930563 |
| 174 | 8 | 0 | -3.618485 | -0.002612 | -0.668514 |
| 175 | 8 | 0 | -0.494869 | 2.434756  | 1.591804  |
| 176 | 8 | 0 | 2.109834  | 2.006788  | 1.827341  |
| 177 | 8 | 0 | 2.355995  | -0.788809 | 1.591804  |
| 178 | 8 | 0 | 0.683012  | -2.830564 | 1.827341  |
| 179 | 8 | 0 | -1.861126 | -1.645947 | 1.591804  |
| 180 | 8 | 0 | -2.792846 | 0.823776  | 1.827341  |
| 181 | 1 | 0 | -0.917294 | 0.682246  | -0.963465 |
| 182 | 1 | 0 | 1.049489  | 0.453277  | -0.963465 |

|     |   |   |           |           |           |
|-----|---|---|-----------|-----------|-----------|
| 183 | 1 | 0 | -0.132195 | -1.135523 | -0.963465 |
| 184 | 1 | 0 | 2.204284  | 1.031473  | 1.851867  |
| 185 | 1 | 0 | -0.208860 | -2.424702 | 1.851867  |
| 186 | 1 | 0 | -1.995424 | 1.393229  | 1.851867  |
| 187 | 1 | 0 | -0.558948 | 1.892806  | -0.027595 |
| 188 | 1 | 0 | 1.918692  | -0.462340 | -0.027595 |
| 189 | 1 | 0 | -1.359744 | -1.430466 | -0.027595 |
| 190 | 1 | 0 | 2.232124  | 2.290826  | 0.894936  |
| 191 | 1 | 0 | 0.867852  | -3.078489 | 0.894936  |
| 192 | 1 | 0 | -3.099976 | 0.787663  | 0.894936  |
| 193 | 1 | 0 | 1.084362  | 2.618820  | -1.074590 |
| 194 | 1 | 0 | 1.725784  | -2.248495 | -1.074590 |
| 195 | 1 | 0 | -2.810146 | -0.370325 | -1.074590 |
| 196 | 1 | 0 | 0.469441  | 2.298667  | 1.824473  |
| 197 | 1 | 0 | 1.755984  | -1.555881 | 1.824473  |
| 198 | 1 | 0 | -2.225425 | -0.742786 | 1.824473  |
| 199 | 1 | 0 | 2.416674  | 3.337958  | -1.404595 |
| 200 | 1 | 0 | 1.682419  | -3.761880 | -1.404595 |
| 201 | 1 | 0 | -4.099093 | 0.423922  | -1.404595 |
| 202 | 1 | 0 | -0.744610 | 3.349425  | 1.811188  |
| 203 | 1 | 0 | 3.272992  | -1.029861 | 1.811188  |
| 204 | 1 | 0 | -2.528382 | -2.319564 | 1.811188  |

(H2O)6 C1 cc3-www1

Standard orientation:

| Center<br>Number | Atomic<br>Number | Atomic<br>Type | Coordinates (Angstroms) |           |           |
|------------------|------------------|----------------|-------------------------|-----------|-----------|
|                  |                  |                | X                       | Y         | Z         |
| 1                | 1                | 0              | -1.362064               | -1.179423 | 0.711760  |
| 2                | 8                | 0              | -1.279300               | -0.606253 | 1.507624  |
| 3                | 1                | 0              | -0.320624               | -0.595605 | 1.696004  |
| 4                | 8                | 0              | -1.334535               | -1.335691 | -1.122550 |
| 5                | 1                | 0              | -1.638036               | -0.418325 | -1.237186 |
| 6                | 1                | 0              | -0.383298               | -1.294745 | -1.338667 |
| 7                | 8                | 0              | -1.576489               | 1.356480  | -0.206298 |
| 8                | 1                | 0              | -1.542476               | 0.731995  | 0.577080  |
| 9                | 1                | 0              | -2.275012               | 1.997761  | -0.022801 |
| 10               | 1                | 0              | 1.658709                | -0.797754 | 0.556835  |
| 11               | 8                | 0              | 1.527184                | -0.394812 | 1.443452  |
| 12               | 1                | 0              | 2.146957                | -0.828020 | 2.044369  |
| 13               | 8                | 0              | 1.411114                | -0.750141 | -1.234081 |
| 14               | 1                | 0              | 1.322027                | 0.242870  | -1.122301 |
| 15               | 1                | 0              | 2.076583                | -0.898374 | -1.918521 |
| 16               | 8                | 0              | 1.106411                | 1.707525  | -0.398328 |
| 17               | 1                | 0              | 1.356516                | 1.427172  | 0.499446  |
| 18               | 1                | 0              | 0.125639                | 1.795576  | -0.364580 |

(H2O)8 D2d cc3-www1

Standard orientation:

| Center<br>Number | Atomic<br>Number | Atomic<br>Type | Coordinates (Angstroms) |           |          |
|------------------|------------------|----------------|-------------------------|-----------|----------|
|                  |                  |                | X                       | Y         | Z        |
| 1                | 8                | 0              | 1.948988                | -0.000000 | 1.292765 |
| 2                | 8                | 0              | 0.000000                | 1.945448  | 1.316376 |
| 3                | 8                | 0              | -1.948988               | -0.000000 | 1.292765 |

|    |   |   |           |           |           |
|----|---|---|-----------|-----------|-----------|
| 4  | 8 | 0 | -0.000000 | -1.945448 | 1.316376  |
| 5  | 8 | 0 | 1.945448  | -0.000000 | -1.316376 |
| 6  | 8 | 0 | 0.000000  | 1.948988  | -1.292765 |
| 7  | 8 | 0 | -1.945448 | 0.000000  | -1.316376 |
| 8  | 8 | 0 | -0.000000 | -1.948988 | -1.292765 |
| 9  | 1 | 0 | 1.382242  | 0.773819  | 1.497221  |
| 10 | 1 | 0 | 1.382242  | -0.773819 | 1.497221  |
| 11 | 1 | 0 | -1.382242 | -0.773819 | 1.497221  |
| 12 | 1 | 0 | -1.382242 | 0.773819  | 1.497221  |
| 13 | 1 | 0 | 0.773819  | 1.382242  | -1.497221 |
| 14 | 1 | 0 | -0.773819 | 1.382242  | -1.497221 |
| 15 | 1 | 0 | -0.773819 | -1.382242 | -1.497221 |
| 16 | 1 | 0 | 0.773819  | -1.382242 | -1.497221 |
| 17 | 1 | 0 | 0.000000  | 2.840613  | 1.679595  |
| 18 | 1 | 0 | -0.000000 | -2.840613 | 1.679595  |
| 19 | 1 | 0 | 2.840613  | -0.000000 | -1.679595 |
| 20 | 1 | 0 | -2.840613 | 0.000000  | -1.679595 |
| 21 | 1 | 0 | 0.000000  | 2.040531  | 0.312045  |
| 22 | 1 | 0 | -0.000000 | -2.040531 | 0.312045  |
| 23 | 1 | 0 | -2.040531 | 0.000000  | -0.312045 |
| 24 | 1 | 0 | 2.040531  | -0.000000 | -0.312045 |

(H2O)12 D3 cc3-wwc1

Standard orientation:

| Center<br>Number | Atomic<br>Number | Atomic<br>Type | Coordinates (Angstroms) |           |           |
|------------------|------------------|----------------|-------------------------|-----------|-----------|
|                  |                  |                | X                       | Y         | Z         |
| 1                | 8                | 0              | -1.382727               | 2.328603  | 1.325055  |
| 2                | 8                | 0              | -2.640839               | 0.060664  | 1.434194  |
| 3                | 8                | 0              | -1.325266               | -2.361778 | 1.325055  |
| 4                | 8                | 0              | 1.267882                | -2.317366 | 1.434194  |
| 5                | 8                | 0              | 2.707993                | 0.033175  | 1.325055  |
| 6                | 8                | 0              | 1.372956                | 2.256701  | 1.434194  |
| 7                | 8                | 0              | -1.372956               | 2.256701  | -1.434194 |
| 8                | 8                | 0              | -2.707993               | 0.033175  | -1.325055 |
| 9                | 8                | 0              | -1.267882               | -2.317366 | -1.434194 |
| 10               | 8                | 0              | 1.325266                | -2.361778 | -1.325055 |
| 11               | 8                | 0              | 2.640839                | 0.060664  | -1.434194 |
| 12               | 8                | 0              | 1.382727                | 2.328603  | -1.325055 |
| 13               | 1                | 0              | -0.421465               | 2.287815  | 1.517897  |
| 14               | 1                | 0              | -1.770574               | -1.508907 | 1.517897  |
| 15               | 1                | 0              | 2.192039                | -0.778908 | 1.517897  |
| 16               | 1                | 0              | -2.192039               | -0.778908 | -1.517897 |
| 17               | 1                | 0              | 1.770574                | -1.508907 | -1.517897 |
| 18               | 1                | 0              | 0.421465                | 2.287815  | -1.517897 |
| 19               | 1                | 0              | -1.428912               | 2.510536  | 0.362222  |
| 20               | 1                | 0              | -1.459732               | -2.492742 | 0.362222  |
| 21               | 1                | 0              | 2.888644                | -0.017794 | 0.362222  |
| 22               | 1                | 0              | -2.888644               | -0.017794 | -0.362222 |
| 23               | 1                | 0              | 1.459732                | -2.492742 | -0.362222 |
| 24               | 1                | 0              | 1.428912                | 2.510536  | -0.362222 |
| 25               | 1                | 0              | -2.112157               | 0.920833  | 1.473540  |
| 26               | 1                | 0              | 0.258614                | -2.289598 | 1.473540  |
| 27               | 1                | 0              | 1.853543                | 1.368765  | 1.473540  |
| 28               | 1                | 0              | -1.853543               | 1.368765  | -1.473540 |
| 29               | 1                | 0              | -0.258614               | -2.289598 | -1.473540 |
| 30               | 1                | 0              | 2.112157                | 0.920833  | -1.473540 |



|    |   |   |           |           |           |
|----|---|---|-----------|-----------|-----------|
| 31 | 1 | 0 | -3.405353 | 0.191391  | 2.010304  |
| 32 | 1 | 0 | 1.536927  | -3.044817 | 2.010304  |
| 33 | 1 | 0 | 1.868426  | 2.853426  | 2.010304  |
| 34 | 1 | 0 | -1.868426 | 2.853426  | -2.010304 |
| 35 | 1 | 0 | -1.536927 | -3.044817 | -2.010304 |
| 36 | 1 | 0 | 3.405353  | 0.191391  | -2.010304 |

(CC3-R)2 w-to-w D3 cc3-rdim

Standard orientation:

| Center Number | Atomic Number | Atomic Type | Coordinates (Angstroms) |           |           |
|---------------|---------------|-------------|-------------------------|-----------|-----------|
|               |               |             | X                       | Y         | Z         |
| 1             | 7             | 0           | -4.329975               | -1.375913 | 1.699133  |
| 2             | 7             | 0           | -4.601968               | 1.514348  | 1.769081  |
| 3             | 7             | 0           | 0.973412                | 4.437825  | 1.699133  |
| 4             | 7             | 0           | 3.612448                | 3.228247  | 1.769081  |
| 5             | 6             | 0           | -1.951324               | -2.749723 | 2.416761  |
| 6             | 1             | 0           | -1.991178               | -2.234154 | 1.459104  |
| 7             | 6             | 0           | -3.042011               | -2.618945 | 3.287378  |
| 8             | 6             | 0           | -4.229497               | -1.841874 | 2.873338  |
| 9             | 1             | 0           | -5.025159               | -1.723751 | 3.625507  |
| 10            | 6             | 0           | -5.544880               | -0.691432 | 1.304510  |
| 11            | 1             | 0           | -6.222787               | -0.524978 | 2.160859  |
| 12            | 6             | 0           | -5.153536               | 0.674579  | 0.716232  |
| 13            | 1             | 0           | -4.398137               | 0.462722  | -0.057007 |
| 14            | 6             | 0           | -6.343270               | 1.379257  | 0.062116  |
| 15            | 1             | 0           | -5.988258               | 2.307677  | -0.397878 |
| 16            | 1             | 0           | -7.061437               | 1.653937  | 0.846216  |
| 17            | 6             | 0           | -7.014239               | 0.495430  | -0.989221 |
| 18            | 1             | 0           | -7.872763               | 1.019252  | -1.422567 |
| 19            | 1             | 0           | -6.307970               | 0.305322  | -1.809932 |
| 20            | 6             | 0           | -7.444961               | -0.836593 | -0.376841 |
| 21            | 1             | 0           | -7.907408               | -1.479149 | -1.133747 |
| 22            | 1             | 0           | -8.205275               | -0.654231 | 0.395479  |
| 23            | 6             | 0           | -6.243685               | -1.549540 | 0.241212  |
| 24            | 1             | 0           | -5.501967               | -1.785208 | -0.535421 |
| 25            | 1             | 0           | -6.537967               | -2.501420 | 0.698974  |
| 26            | 6             | 0           | -3.343365               | 1.673833  | 1.773620  |
| 27            | 1             | 0           | -2.696869               | 1.201876  | 1.019048  |
| 28            | 6             | 0           | -2.644745               | 2.530845  | 2.753455  |
| 29            | 6             | 0           | -3.218954               | 2.847140  | 3.991042  |
| 30            | 1             | 0           | -4.188144               | 2.422846  | 4.241186  |
| 31            | 6             | 0           | -2.550664               | 3.679511  | 4.883171  |
| 32            | 6             | 0           | -1.315754               | 4.236267  | 4.521023  |
| 33            | 1             | 0           | -0.819989               | 4.899458  | 5.225202  |
| 34            | 6             | 0           | -0.747067               | 3.943931  | 3.287378  |
| 35            | 6             | 0           | -1.405668               | 3.064758  | 2.416761  |
| 36            | 1             | 0           | -0.939246               | 2.841488  | 1.459104  |
| 37            | 6             | 0           | 0.519638                | 4.583789  | 2.873338  |
| 38            | 1             | 0           | 1.019768                | 5.213790  | 3.625507  |
| 39            | 6             | 0           | 2.173642                | 5.147723  | 1.304510  |
| 40            | 1             | 0           | 2.656749                | 5.651581  | 2.160859  |
| 41            | 6             | 0           | 3.160971                | 4.125804  | 0.716232  |
| 42            | 1             | 0           | 2.599798                | 3.577538  | -0.057007 |
| 43            | 6             | 0           | 4.366106                | 4.803804  | 0.062116  |
| 44            | 1             | 0           | 4.992635                | 4.032145  | -0.397878 |
| 45            | 1             | 0           | 4.963070                | 5.288416  | 0.846216  |

|     |   |   |           |           |           |
|-----|---|---|-----------|-----------|-----------|
| 46  | 6 | 0 | 3.936175  | 5.826794  | -0.989221 |
| 47  | 1 | 0 | 3.418401  | 5.310201  | -1.809932 |
| 48  | 1 | 0 | 4.819080  | 6.308387  | -1.422567 |
| 49  | 6 | 0 | 2.997970  | 6.865822  | -0.376841 |
| 50  | 1 | 0 | 3.536057  | 7.433092  | 0.395479  |
| 51  | 1 | 0 | 2.672724  | 7.587591  | -1.133747 |
| 52  | 6 | 0 | 1.779901  | 6.181960  | 0.241212  |
| 53  | 1 | 0 | 1.204948  | 5.657447  | -0.535421 |
| 54  | 1 | 0 | 1.102690  | 6.912755  | 0.698974  |
| 55  | 6 | 0 | 3.121265  | 2.058522  | 1.773620  |
| 56  | 1 | 0 | 2.389290  | 1.734619  | 1.019048  |
| 57  | 7 | 0 | -2.808729 | -4.618292 | 7.041113  |
| 58  | 7 | 0 | -1.689184 | -3.307549 | 9.349540  |
| 59  | 7 | 0 | -2.019829 | 3.116651  | 9.349540  |
| 60  | 7 | 0 | -2.595194 | 4.741576  | 7.041113  |
| 61  | 6 | 0 | -3.010838 | -3.257610 | 4.521023  |
| 62  | 1 | 0 | -3.833061 | -3.159860 | 5.225202  |
| 63  | 6 | 0 | -1.911218 | -4.048695 | 4.883171  |
| 64  | 6 | 0 | -1.859362 | -4.703085 | 6.205387  |
| 65  | 1 | 0 | -0.938693 | -5.266234 | 6.423930  |
| 66  | 6 | 0 | -2.652449 | -5.293403 | 8.314066  |
| 67  | 1 | 0 | -1.655455 | -5.761433 | 8.404486  |
| 68  | 6 | 0 | -2.780667 | -4.258317 | 9.443164  |
| 69  | 1 | 0 | -3.760316 | -3.761049 | 9.323942  |
| 70  | 6 | 0 | -2.725239 | -4.947275 | 10.811326 |
| 71  | 1 | 0 | -2.831811 | -4.187823 | 11.593555 |
| 72  | 1 | 0 | -1.728480 | -5.391233 | 10.931781 |
| 73  | 6 | 0 | -3.801395 | -6.025601 | 10.941747 |
| 74  | 1 | 0 | -3.725529 | -6.513821 | 11.919041 |
| 75  | 1 | 0 | -4.794167 | -5.557517 | 10.896207 |
| 76  | 6 | 0 | -3.678656 | -7.054070 | 9.816093  |
| 77  | 1 | 0 | -4.472638 | -7.804419 | 9.892001  |
| 78  | 1 | 0 | -2.724613 | -7.588990 | 9.918395  |
| 79  | 6 | 0 | -3.733762 | -6.371108 | 8.449231  |
| 80  | 1 | 0 | -4.712308 | -5.895268 | 8.303591  |
| 81  | 1 | 0 | -3.610231 | -7.098929 | 7.639897  |
| 82  | 6 | 0 | -1.985295 | -2.080206 | 9.231700  |
| 83  | 1 | 0 | -3.030226 | -1.736204 | 9.180994  |
| 84  | 6 | 0 | -0.961815 | -1.016501 | 9.184709  |
| 85  | 6 | 0 | 0.404301  | -1.332314 | 9.182757  |
| 86  | 1 | 0 | 0.694375  | -2.379867 | 9.193765  |
| 87  | 6 | 0 | 1.361223  | -0.324706 | 9.184709  |
| 88  | 6 | 0 | 0.951667  | 1.016291  | 9.182757  |
| 89  | 1 | 0 | 1.713838  | 1.791280  | 9.193765  |
| 90  | 6 | 0 | -0.399408 | 1.341206  | 9.184709  |
| 91  | 6 | 0 | -1.355968 | 0.316022  | 9.182757  |
| 92  | 1 | 0 | -2.408213 | 0.588587  | 9.193765  |
| 93  | 6 | 0 | -0.808864 | 2.759419  | 9.231700  |
| 94  | 1 | 0 | 0.011516  | 3.492355  | 9.180994  |
| 95  | 6 | 0 | -2.297477 | 4.537287  | 9.443164  |
| 96  | 1 | 0 | -1.377006 | 5.137054  | 9.323942  |
| 97  | 6 | 0 | -3.257997 | 4.943790  | 8.314066  |
| 98  | 1 | 0 | -4.161820 | 4.314383  | 8.404486  |
| 99  | 6 | 0 | -3.650660 | 6.419087  | 8.449231  |
| 100 | 1 | 0 | -4.342737 | 6.676016  | 7.639897  |
| 101 | 1 | 0 | -2.749298 | 7.028613  | 8.303591  |
| 102 | 6 | 0 | -4.269676 | 6.712844  | 9.816093  |
| 103 | 1 | 0 | -5.209952 | 6.154079  | 9.918395  |
| 104 | 1 | 0 | -4.522506 | 7.775628  | 9.892001  |

|     |   |   |           |           |           |
|-----|---|---|-----------|-----------|-----------|
| 105 | 6 | 0 | -3.317626 | 6.304905  | 10.941747 |
| 106 | 1 | 0 | -2.415867 | 6.930629  | 10.896207 |
| 107 | 1 | 0 | -3.778370 | 6.483313  | 11.919041 |
| 108 | 6 | 0 | -2.921846 | 4.833764  | 10.811326 |
| 109 | 1 | 0 | -3.804705 | 4.192524  | 10.931781 |
| 110 | 1 | 0 | -2.210856 | 4.546331  | 11.593555 |
| 111 | 6 | 0 | -3.143309 | 3.961797  | 6.205387  |
| 112 | 1 | 0 | -4.091346 | 3.446049  | 6.423930  |
| 113 | 7 | 0 | 0.989520  | -4.742595 | 1.769081  |
| 114 | 7 | 0 | 3.356563  | -3.061912 | 1.699133  |
| 115 | 7 | 0 | 5.403922  | -0.123285 | 7.041113  |
| 116 | 7 | 0 | 3.709013  | 0.190898  | 9.349540  |
| 117 | 6 | 0 | -0.856219 | -4.211266 | 3.991042  |
| 118 | 1 | 0 | -0.004174 | -4.838462 | 4.241186  |
| 119 | 6 | 0 | -0.869403 | -3.555839 | 2.753455  |
| 120 | 6 | 0 | 0.222100  | -3.732356 | 1.773620  |
| 121 | 1 | 0 | 0.307579  | -2.936495 | 1.019048  |
| 122 | 6 | 0 | 1.992565  | -4.800383 | 0.716232  |
| 123 | 1 | 0 | 1.798340  | -4.040260 | -0.057007 |
| 124 | 6 | 0 | 3.371238  | -4.456291 | 1.304510  |
| 125 | 1 | 0 | 3.566038  | -5.126603 | 2.160859  |
| 126 | 6 | 0 | 4.463783  | -4.632420 | 0.241212  |
| 127 | 1 | 0 | 5.435277  | -4.411335 | 0.698974  |
| 128 | 1 | 0 | 4.297019  | -3.872239 | -0.535421 |
| 129 | 6 | 0 | 4.446991  | -6.029229 | -0.376841 |
| 130 | 1 | 0 | 5.234685  | -6.108442 | -1.133747 |
| 131 | 1 | 0 | 4.669218  | -6.778861 | 0.395479  |
| 132 | 6 | 0 | 3.078064  | -6.322224 | -0.989221 |
| 133 | 1 | 0 | 3.053683  | -7.327639 | -1.422567 |
| 134 | 1 | 0 | 2.889569  | -5.615523 | -1.809932 |
| 135 | 6 | 0 | 1.977164  | -6.183061 | 0.062116  |
| 136 | 1 | 0 | 2.098367  | -6.942352 | 0.846216  |
| 137 | 1 | 0 | 0.995622  | -6.339822 | -0.397878 |
| 138 | 6 | 0 | 3.709859  | -2.741915 | 2.873338  |
| 139 | 1 | 0 | 4.005391  | -3.490040 | 3.625507  |
| 140 | 6 | 0 | 3.789078  | -1.324987 | 3.287378  |
| 141 | 6 | 0 | 3.356992  | -0.315034 | 2.416761  |
| 142 | 1 | 0 | 2.930423  | -0.607333 | 1.459104  |
| 143 | 6 | 0 | 3.514149  | 1.024994  | 2.753455  |
| 144 | 6 | 0 | 4.075173  | 1.364126  | 3.991042  |
| 145 | 1 | 0 | 4.192318  | 2.415616  | 4.241186  |
| 146 | 6 | 0 | 4.461882  | 0.369184  | 4.883171  |
| 147 | 6 | 0 | 4.326592  | -0.978657 | 4.521023  |
| 148 | 1 | 0 | 4.653050  | -1.739598 | 5.225202  |
| 149 | 6 | 0 | 5.002672  | 0.741287  | 6.205387  |
| 150 | 1 | 0 | 5.030039  | 1.820185  | 6.423930  |
| 151 | 6 | 0 | 5.910446  | 0.349614  | 8.314066  |
| 152 | 1 | 0 | 5.817275  | 1.447051  | 8.404486  |
| 153 | 6 | 0 | 5.078144  | -0.278970 | 9.443164  |
| 154 | 1 | 0 | 5.137322  | -1.376005 | 9.323942  |
| 155 | 6 | 0 | 5.647085  | 0.113511  | 10.811326 |
| 156 | 1 | 0 | 5.042666  | -0.358509 | 11.593555 |
| 157 | 1 | 0 | 5.533185  | 1.198709  | 10.931781 |
| 158 | 6 | 0 | 7.119021  | -0.279304 | 10.941747 |
| 159 | 1 | 0 | 7.210035  | -1.373112 | 10.896207 |
| 160 | 1 | 0 | 7.503899  | 0.030508  | 11.919041 |
| 161 | 6 | 0 | 7.948331  | 0.341225  | 9.816093  |
| 162 | 1 | 0 | 7.934565  | 1.434911  | 9.918395  |
| 163 | 1 | 0 | 8.995144  | 0.028791  | 9.892001  |

|     |   |   |           |           |           |
|-----|---|---|-----------|-----------|-----------|
| 164 | 6 | 0 | 7.384423  | -0.047979 | 8.449231  |
| 165 | 1 | 0 | 7.461606  | -1.133344 | 8.303591  |
| 166 | 1 | 0 | 7.952968  | 0.422912  | 7.639897  |
| 167 | 6 | 0 | 2.794159  | -0.679213 | 9.231700  |
| 168 | 1 | 0 | 3.018710  | -1.756150 | 9.180994  |
| 169 | 7 | 0 | -3.356563 | -3.061912 | -1.699133 |
| 170 | 7 | 0 | -0.989520 | -4.742595 | -1.769081 |
| 171 | 7 | 0 | 4.329975  | -1.375913 | -1.699133 |
| 172 | 7 | 0 | 4.601968  | 1.514348  | -1.769081 |
| 173 | 6 | 0 | -3.356992 | -0.315034 | -2.416761 |
| 174 | 1 | 0 | -2.930423 | -0.607333 | -1.459104 |
| 175 | 6 | 0 | -3.789078 | -1.324987 | -3.287378 |
| 176 | 6 | 0 | -3.709859 | -2.741915 | -2.873338 |
| 177 | 1 | 0 | -4.005391 | -3.490040 | -3.625507 |
| 178 | 6 | 0 | -3.371238 | -4.456291 | -1.304510 |
| 179 | 1 | 0 | -3.566038 | -5.126603 | -2.160859 |
| 180 | 6 | 0 | -1.992565 | -4.800383 | -0.716232 |
| 181 | 1 | 0 | -1.798340 | -4.040260 | 0.057007  |
| 182 | 6 | 0 | -1.977164 | -6.183061 | -0.062116 |
| 183 | 1 | 0 | -0.995622 | -6.339822 | 0.397878  |
| 184 | 1 | 0 | -2.098367 | -6.942352 | -0.846216 |
| 185 | 6 | 0 | -3.078064 | -6.322224 | 0.989221  |
| 186 | 1 | 0 | -3.053683 | -7.327639 | 1.422567  |
| 187 | 1 | 0 | -2.889569 | -5.615523 | 1.809932  |
| 188 | 6 | 0 | -4.446991 | -6.029229 | 0.376841  |
| 189 | 1 | 0 | -5.234685 | -6.108442 | 1.133747  |
| 190 | 1 | 0 | -4.669218 | -6.778861 | -0.395479 |
| 191 | 6 | 0 | -4.463783 | -4.632420 | -0.241212 |
| 192 | 1 | 0 | -4.297019 | -3.872239 | 0.535421  |
| 193 | 1 | 0 | -5.435277 | -4.411335 | -0.698974 |
| 194 | 6 | 0 | -0.222100 | -3.732356 | -1.773620 |
| 195 | 1 | 0 | -0.307579 | -2.936495 | -1.019048 |
| 196 | 6 | 0 | 0.869403  | -3.555839 | -2.753455 |
| 197 | 6 | 0 | 0.856219  | -4.211266 | -3.991042 |
| 198 | 1 | 0 | 0.004174  | -4.838462 | -4.241186 |
| 199 | 6 | 0 | 1.911218  | -4.048695 | -4.883171 |
| 200 | 6 | 0 | 3.010838  | -3.257610 | -4.521023 |
| 201 | 1 | 0 | 3.833061  | -3.159860 | -5.225202 |
| 202 | 6 | 0 | 3.042011  | -2.618945 | -3.287378 |
| 203 | 6 | 0 | 1.951324  | -2.749723 | -2.416761 |
| 204 | 1 | 0 | 1.991178  | -2.234154 | -1.459104 |
| 205 | 6 | 0 | 4.229497  | -1.841874 | -2.873338 |
| 206 | 1 | 0 | 5.025159  | -1.723751 | -3.625507 |
| 207 | 6 | 0 | 5.544880  | -0.691432 | -1.304510 |
| 208 | 1 | 0 | 6.222787  | -0.524978 | -2.160859 |
| 209 | 6 | 0 | 5.153536  | 0.674579  | -0.716232 |
| 210 | 1 | 0 | 4.398137  | 0.462722  | 0.057007  |
| 211 | 6 | 0 | 6.343270  | 1.379257  | -0.062116 |
| 212 | 1 | 0 | 5.988258  | 2.307677  | 0.397878  |
| 213 | 1 | 0 | 7.061437  | 1.653937  | -0.846216 |
| 214 | 6 | 0 | 7.014239  | 0.495430  | 0.989221  |
| 215 | 1 | 0 | 6.307970  | 0.305322  | 1.809932  |
| 216 | 1 | 0 | 7.872763  | 1.019252  | 1.422567  |
| 217 | 6 | 0 | 7.444961  | -0.836593 | 0.376841  |
| 218 | 1 | 0 | 8.205275  | -0.654231 | -0.395479 |
| 219 | 1 | 0 | 7.907408  | -1.479149 | 1.133747  |
| 220 | 6 | 0 | 6.243685  | -1.549540 | -0.241212 |
| 221 | 1 | 0 | 5.501967  | -1.785208 | 0.535421  |
| 222 | 1 | 0 | 6.537967  | -2.501420 | -0.698974 |

|     |   |   |           |           |            |
|-----|---|---|-----------|-----------|------------|
| 223 | 6 | 0 | 3.343365  | 1.673833  | -1.773620  |
| 224 | 1 | 0 | 2.696869  | 1.201876  | -1.019048  |
| 225 | 7 | 0 | -5.403922 | -0.123285 | -7.041113  |
| 226 | 7 | 0 | -3.709013 | 0.190898  | -9.349540  |
| 227 | 7 | 0 | 1.689184  | -3.307549 | -9.349540  |
| 228 | 7 | 0 | 2.808729  | -4.618292 | -7.041113  |
| 229 | 6 | 0 | -4.326592 | -0.978657 | -4.521023  |
| 230 | 1 | 0 | -4.653050 | -1.739598 | -5.225202  |
| 231 | 6 | 0 | -4.461882 | 0.369184  | -4.883171  |
| 232 | 6 | 0 | -5.002672 | 0.741287  | -6.205387  |
| 233 | 1 | 0 | -5.030039 | 1.820185  | -6.423930  |
| 234 | 6 | 0 | -5.910446 | 0.349614  | -8.314066  |
| 235 | 1 | 0 | -5.817275 | 1.447051  | -8.404486  |
| 236 | 6 | 0 | -5.078144 | -0.278970 | -9.443164  |
| 237 | 1 | 0 | -5.137322 | -1.376005 | -9.323942  |
| 238 | 6 | 0 | -5.647085 | 0.113511  | -10.811326 |
| 239 | 1 | 0 | -5.042666 | -0.358509 | -11.593555 |
| 240 | 1 | 0 | -5.533185 | 1.198709  | -10.931781 |
| 241 | 6 | 0 | -7.119021 | -0.279304 | -10.941747 |
| 242 | 1 | 0 | -7.503899 | 0.030508  | -11.919041 |
| 243 | 1 | 0 | -7.210035 | -1.373112 | -10.896207 |
| 244 | 6 | 0 | -7.948331 | 0.341225  | -9.816093  |
| 245 | 1 | 0 | -8.995144 | 0.028791  | -9.892001  |
| 246 | 1 | 0 | -7.934565 | 1.434911  | -9.918395  |
| 247 | 6 | 0 | -7.384423 | -0.047979 | -8.449231  |
| 248 | 1 | 0 | -7.461606 | -1.133344 | -8.303591  |
| 249 | 1 | 0 | -7.952968 | 0.422912  | -7.639897  |
| 250 | 6 | 0 | -2.794159 | -0.679213 | -9.231700  |
| 251 | 1 | 0 | -3.018710 | -1.756150 | -9.180994  |
| 252 | 6 | 0 | -1.361223 | -0.324706 | -9.184709  |
| 253 | 6 | 0 | -0.951667 | 1.016291  | -9.182757  |
| 254 | 1 | 0 | -1.713838 | 1.791280  | -9.193765  |
| 255 | 6 | 0 | 0.399408  | 1.341206  | -9.184709  |
| 256 | 6 | 0 | 1.355968  | 0.316022  | -9.182757  |
| 257 | 1 | 0 | 2.408213  | 0.588587  | -9.193765  |
| 258 | 6 | 0 | 0.961815  | -1.016501 | -9.184709  |
| 259 | 6 | 0 | -0.404301 | -1.332314 | -9.182757  |
| 260 | 1 | 0 | -0.694375 | -2.379867 | -9.193765  |
| 261 | 6 | 0 | 1.985295  | -2.080206 | -9.231700  |
| 262 | 1 | 0 | 3.030226  | -1.736204 | -9.180994  |
| 263 | 6 | 0 | 2.780667  | -4.258317 | -9.443164  |
| 264 | 1 | 0 | 3.760316  | -3.761049 | -9.323942  |
| 265 | 6 | 0 | 2.652449  | -5.293403 | -8.314066  |
| 266 | 1 | 0 | 1.655455  | -5.761433 | -8.404486  |
| 267 | 6 | 0 | 3.733762  | -6.371108 | -8.449231  |
| 268 | 1 | 0 | 3.610231  | -7.098929 | -7.639897  |
| 269 | 1 | 0 | 4.712308  | -5.895268 | -8.303591  |
| 270 | 6 | 0 | 3.678656  | -7.054070 | -9.816093  |
| 271 | 1 | 0 | 2.724613  | -7.588990 | -9.918395  |
| 272 | 1 | 0 | 4.472638  | -7.804419 | -9.892001  |
| 273 | 6 | 0 | 3.801395  | -6.025601 | -10.941747 |
| 274 | 1 | 0 | 4.794167  | -5.557517 | -10.896207 |
| 275 | 1 | 0 | 3.725529  | -6.513821 | -11.919041 |
| 276 | 6 | 0 | 2.725239  | -4.947275 | -10.811326 |
| 277 | 1 | 0 | 1.728480  | -5.391233 | -10.931781 |
| 278 | 1 | 0 | 2.831811  | -4.187823 | -11.593555 |
| 279 | 6 | 0 | 1.859362  | -4.703085 | -6.205387  |
| 280 | 1 | 0 | 0.938693  | -5.266234 | -6.423930  |
| 281 | 7 | 0 | -3.612448 | 3.228247  | -1.769081  |

|     |   |   |           |          |            |
|-----|---|---|-----------|----------|------------|
| 282 | 7 | 0 | -0.973412 | 4.437825 | -1.699133  |
| 283 | 7 | 0 | 2.595194  | 4.741576 | -7.041113  |
| 284 | 7 | 0 | 2.019829  | 3.116651 | -9.349540  |
| 285 | 6 | 0 | -4.075173 | 1.364126 | -3.991042  |
| 286 | 1 | 0 | -4.192318 | 2.415616 | -4.241186  |
| 287 | 6 | 0 | -3.514149 | 1.024994 | -2.753455  |
| 288 | 6 | 0 | -3.121265 | 2.058522 | -1.773620  |
| 289 | 1 | 0 | -2.389290 | 1.734619 | -1.019048  |
| 290 | 6 | 0 | -3.160971 | 4.125804 | -0.716232  |
| 291 | 1 | 0 | -2.599798 | 3.577538 | 0.057007   |
| 292 | 6 | 0 | -2.173642 | 5.147723 | -1.304510  |
| 293 | 1 | 0 | -2.656749 | 5.651581 | -2.160859  |
| 294 | 6 | 0 | -1.779901 | 6.181960 | -0.241212  |
| 295 | 1 | 0 | -1.102690 | 6.912755 | -0.698974  |
| 296 | 1 | 0 | -1.204948 | 5.657447 | 0.535421   |
| 297 | 6 | 0 | -2.997970 | 6.865822 | 0.376841   |
| 298 | 1 | 0 | -2.672724 | 7.587591 | 1.133747   |
| 299 | 1 | 0 | -3.536057 | 7.433092 | -0.395479  |
| 300 | 6 | 0 | -3.936175 | 5.826794 | 0.989221   |
| 301 | 1 | 0 | -4.819080 | 6.308387 | 1.422567   |
| 302 | 1 | 0 | -3.418401 | 5.310201 | 1.809932   |
| 303 | 6 | 0 | -4.366106 | 4.803804 | -0.062116  |
| 304 | 1 | 0 | -4.963070 | 5.288416 | -0.846216  |
| 305 | 1 | 0 | -4.992635 | 4.032145 | 0.397878   |
| 306 | 6 | 0 | -0.519638 | 4.583789 | -2.873338  |
| 307 | 1 | 0 | -1.019768 | 5.213790 | -3.625507  |
| 308 | 6 | 0 | 0.747067  | 3.943931 | -3.287378  |
| 309 | 6 | 0 | 1.405668  | 3.064758 | -2.416761  |
| 310 | 1 | 0 | 0.939246  | 2.841488 | -1.459104  |
| 311 | 6 | 0 | 2.644745  | 2.530845 | -2.753455  |
| 312 | 6 | 0 | 3.218954  | 2.847140 | -3.991042  |
| 313 | 1 | 0 | 4.188144  | 2.422846 | -4.241186  |
| 314 | 6 | 0 | 2.550664  | 3.679511 | -4.883171  |
| 315 | 6 | 0 | 1.315754  | 4.236267 | -4.521023  |
| 316 | 1 | 0 | 0.819989  | 4.899458 | -5.225202  |
| 317 | 6 | 0 | 3.143309  | 3.961797 | -6.205387  |
| 318 | 1 | 0 | 4.091346  | 3.446049 | -6.423930  |
| 319 | 6 | 0 | 3.257997  | 4.943790 | -8.314066  |
| 320 | 1 | 0 | 4.161820  | 4.314383 | -8.404486  |
| 321 | 6 | 0 | 2.297477  | 4.537287 | -9.443164  |
| 322 | 1 | 0 | 1.377006  | 5.137054 | -9.323942  |
| 323 | 6 | 0 | 2.921846  | 4.833764 | -10.811326 |
| 324 | 1 | 0 | 2.210856  | 4.546331 | -11.593555 |
| 325 | 1 | 0 | 3.804705  | 4.192524 | -10.931781 |
| 326 | 6 | 0 | 3.317626  | 6.304905 | -10.941747 |
| 327 | 1 | 0 | 2.415867  | 6.930629 | -10.896207 |
| 328 | 1 | 0 | 3.778370  | 6.483313 | -11.919041 |
| 329 | 6 | 0 | 4.269676  | 6.712844 | -9.816093  |
| 330 | 1 | 0 | 5.209952  | 6.154079 | -9.918395  |
| 331 | 1 | 0 | 4.522506  | 7.775628 | -9.892001  |
| 332 | 6 | 0 | 3.650660  | 6.419087 | -8.449231  |
| 333 | 1 | 0 | 2.749298  | 7.028613 | -8.303591  |
| 334 | 1 | 0 | 4.342737  | 6.676016 | -7.639897  |
| 335 | 6 | 0 | 0.808864  | 2.759419 | -9.231700  |
| 336 | 1 | 0 | -0.011516 | 3.492355 | -9.180994  |

(CC3-R)2 w-to-a C3 cc3-rdim6

Standard orientation:

| Center<br>Number | Atomic<br>Number | Atomic<br>Type | Coordinates (Angstroms) |          |           |
|------------------|------------------|----------------|-------------------------|----------|-----------|
|                  |                  |                | X                       | Y        | Z         |
| 1                | 7                | 0              | 1.988254                | 4.360432 | 2.274098  |
| 2                | 7                | 0              | -0.857197               | 4.552397 | 2.008100  |
| 3                | 7                | 0              | -4.093272               | 3.379994 | 7.414868  |
| 4                | 7                | 0              | -3.025928               | 2.148303 | 9.787308  |
| 5                | 6                | 0              | 3.199144                | 2.762324 | 4.367453  |
| 6                | 1                | 0              | 2.929120                | 3.784457 | 4.621135  |
| 7                | 6                | 0              | 2.869793                | 2.276454 | 3.095232  |
| 8                | 6                | 0              | 2.216528                | 3.127159 | 2.083738  |
| 9                | 1                | 0              | 1.971152                | 2.622174 | 1.137499  |
| 10               | 6                | 0              | 1.365262                | 5.095276 | 1.192068  |
| 11               | 1                | 0              | 1.148268                | 4.437829 | 0.329117  |
| 12               | 6                | 0              | 0.023038                | 5.658473 | 1.688085  |
| 13               | 1                | 0              | 0.237322                | 6.275146 | 2.579446  |
| 14               | 6                | 0              | -0.626811               | 6.528631 | 0.609134  |
| 15               | 1                | 0              | -1.577991               | 6.918282 | 0.989878  |
| 16               | 1                | 0              | -0.866869               | 5.885942 | -0.249053 |
| 17               | 6                | 0              | 0.300723                | 7.661105 | 0.167931  |
| 18               | 1                | 0              | -0.180656               | 8.257238 | -0.614353 |
| 19               | 1                | 0              | 0.482452                | 8.335477 | 1.015901  |
| 20               | 6                | 0              | 1.636559                | 7.102577 | -0.327007 |
| 21               | 1                | 0              | 2.311713                | 7.916337 | -0.612009 |
| 22               | 1                | 0              | 1.462778                | 6.502484 | -1.230821 |
| 23               | 6                | 0              | 2.292223                | 6.229334 | 0.743602  |
| 24               | 1                | 0              | 2.542947                | 6.834929 | 1.624251  |
| 25               | 1                | 0              | 3.228952                | 5.794057 | 0.378324  |
| 26               | 6                | 0              | -1.180477               | 4.385063 | 3.224505  |
| 27               | 1                | 0              | -0.823090               | 5.057741 | 4.019057  |
| 28               | 6                | 0              | -2.098293               | 3.309808 | 3.645286  |
| 29               | 6                | 0              | -2.450755               | 2.292447 | 2.748676  |
| 30               | 1                | 0              | -1.991103               | 2.273581 | 1.763771  |
| 31               | 6                | 0              | -3.406363               | 1.347087 | 3.095232  |
| 32               | 6                | 0              | -3.991815               | 1.389378 | 4.367453  |
| 33               | 1                | 0              | -4.741996               | 0.644464 | 4.621135  |
| 34               | 6                | 0              | -3.629073               | 2.377911 | 5.275385  |
| 35               | 6                | 0              | -2.678593               | 3.341454 | 4.907453  |
| 36               | 1                | 0              | -2.426361               | 4.120498 | 5.622343  |
| 37               | 6                | 0              | -4.283818               | 2.429778 | 6.597266  |
| 38               | 1                | 0              | -4.967479               | 1.596362 | 6.822855  |
| 39               | 6                | 0              | -4.820586               | 3.347785 | 8.668572  |
| 40               | 1                | 0              | -5.422574               | 2.425870 | 8.763573  |
| 41               | 6                | 0              | -3.816463               | 3.362487 | 9.831904  |
| 42               | 1                | 0              | -3.184855               | 4.261293 | 9.711289  |
| 43               | 6                | 0              | -4.551609               | 3.434658 | 11.174663 |
| 44               | 1                | 0              | -3.811759               | 3.455383 | 11.982242 |
| 45               | 1                | 0              | -5.132008               | 2.510991 | 11.297715 |
| 46               | 6                | 0              | -5.476218               | 4.650494 | 11.244307 |
| 47               | 1                | 0              | -4.875564               | 5.568992 | 11.195032 |
| 48               | 1                | 0              | -6.002103               | 4.666669 | 12.204744 |
| 49               | 6                | 0              | -6.474197               | 4.640167 | 10.085040 |
| 50               | 1                | 0              | -7.137177               | 3.770250 | 10.187539 |
| 51               | 1                | 0              | -7.111434               | 5.530196 | 10.117697 |
| 52               | 6                | 0              | -5.745430               | 4.567799 | 8.742817  |
| 53               | 1                | 0              | -5.136327               | 5.468996 | 8.594408  |
| 54               | 1                | 0              | -6.456240               | 4.523593 | 7.910441  |
| 55               | 6                | 0              | -1.769140               | 2.265811 | 9.669233  |

|     |   |   |           |           |           |
|-----|---|---|-----------|-----------|-----------|
| 56  | 1 | 0 | -1.280243 | 3.249825  | 9.596127  |
| 57  | 7 | 0 | 4.371090  | -1.533844 | 2.008100  |
| 58  | 7 | 0 | 2.782118  | -3.902094 | 2.274098  |
| 59  | 7 | 0 | -3.513893 | -3.018553 | 2.008100  |
| 60  | 7 | 0 | -4.770372 | -0.458338 | 2.274098  |
| 61  | 6 | 0 | 3.210695  | 0.976193  | 2.748676  |
| 62  | 1 | 0 | 2.964530  | 0.587555  | 1.763771  |
| 63  | 6 | 0 | 3.915524  | 0.162271  | 3.645286  |
| 64  | 6 | 0 | 4.387814  | -1.170208 | 3.224505  |
| 65  | 1 | 0 | 4.791677  | -1.816054 | 4.019057  |
| 66  | 6 | 0 | 4.888862  | -2.849188 | 1.688085  |
| 67  | 1 | 0 | 5.315775  | -3.343100 | 2.579446  |
| 68  | 6 | 0 | 3.730007  | -3.729990 | 1.192068  |
| 69  | 1 | 0 | 3.269139  | -3.213344 | 0.329117  |
| 70  | 6 | 0 | 4.248650  | -5.099790 | 0.743602  |
| 71  | 1 | 0 | 3.403325  | -5.693383 | 0.378324  |
| 72  | 1 | 0 | 4.647749  | -5.619721 | 1.624251  |
| 73  | 6 | 0 | 5.332733  | -4.968590 | -0.327007 |
| 74  | 1 | 0 | 5.699892  | -5.960171 | -0.612009 |
| 75  | 1 | 0 | 4.899927  | -4.518045 | -1.230821 |
| 76  | 6 | 0 | 6.484350  | -4.090986 | 0.167931  |
| 77  | 1 | 0 | 7.241306  | -3.972166 | -0.614353 |
| 78  | 1 | 0 | 6.977509  | -4.585554 | 1.015901  |
| 79  | 6 | 0 | 5.967366  | -2.721481 | 0.609134  |
| 80  | 1 | 0 | 5.530810  | -2.192240 | -0.249053 |
| 81  | 1 | 0 | 6.780403  | -2.092561 | 0.989878  |
| 82  | 6 | 0 | 1.599935  | -3.483149 | 2.083738  |
| 83  | 1 | 0 | 1.285293  | -3.018155 | 1.137499  |
| 84  | 6 | 0 | 0.536570  | -3.623541 | 3.095232  |
| 85  | 6 | 0 | 0.792671  | -4.151702 | 4.367453  |
| 86  | 1 | 0 | 1.812876  | -4.428921 | 4.621135  |
| 87  | 6 | 0 | -0.244795 | -4.331825 | 5.275385  |
| 88  | 6 | 0 | -1.554488 | -3.990457 | 4.907453  |
| 89  | 1 | 0 | -2.355275 | -4.161539 | 5.622343  |
| 90  | 6 | 0 | -1.817231 | -3.472079 | 3.645286  |
| 91  | 6 | 0 | -0.759940 | -3.268640 | 2.748676  |
| 92  | 1 | 0 | -0.973427 | -2.861136 | 1.763771  |
| 93  | 6 | 0 | -3.207337 | -3.214855 | 3.224505  |
| 94  | 1 | 0 | -3.968587 | -3.241687 | 4.019057  |
| 95  | 6 | 0 | -4.911900 | -2.809285 | 1.688085  |
| 96  | 1 | 0 | -5.553097 | -2.932046 | 2.579446  |
| 97  | 6 | 0 | -5.095269 | -1.365286 | 1.192068  |
| 98  | 1 | 0 | -4.417407 | -1.224485 | 0.329117  |
| 99  | 6 | 0 | -6.540873 | -1.129544 | 0.743602  |
| 100 | 1 | 0 | -6.632277 | -0.100674 | 0.378324  |
| 101 | 1 | 0 | -7.190696 | -1.215208 | 1.624251  |
| 102 | 6 | 0 | -6.969292 | -2.133987 | -0.327007 |
| 103 | 1 | 0 | -6.362705 | -1.984439 | -1.230821 |
| 104 | 1 | 0 | -8.011605 | -1.956166 | -0.612009 |
| 105 | 6 | 0 | -6.785073 | -3.570119 | 0.167931  |
| 106 | 1 | 0 | -7.459961 | -3.749923 | 1.015901  |
| 107 | 1 | 0 | -7.060650 | -4.285072 | -0.614353 |
| 108 | 6 | 0 | -5.340555 | -3.807150 | 0.609134  |
| 109 | 1 | 0 | -4.663941 | -3.693702 | -0.249053 |
| 110 | 1 | 0 | -5.202412 | -4.825721 | 0.989878  |
| 111 | 6 | 0 | -3.816463 | 0.355990  | 2.083738  |
| 112 | 1 | 0 | -3.256445 | 0.395981  | 1.137499  |
| 113 | 7 | 0 | 4.973797  | 1.854881  | 7.414868  |
| 114 | 7 | 0 | 3.373449  | 1.546379  | 9.787308  |



|     |   |   |           |           |           |
|-----|---|---|-----------|-----------|-----------|
| 115 | 7 | 0 | -0.347521 | -3.694682 | 9.787308  |
| 116 | 7 | 0 | -0.880525 | -5.234875 | 7.414868  |
| 117 | 6 | 0 | 4.233081  | 0.649003  | 4.907453  |
| 118 | 1 | 0 | 4.781636  | 0.041041  | 5.622343  |
| 119 | 6 | 0 | 3.873868  | 1.953914  | 5.275385  |
| 120 | 6 | 0 | 4.246158  | 2.495006  | 6.597266  |
| 121 | 1 | 0 | 3.866230  | 3.503782  | 6.822855  |
| 122 | 6 | 0 | 5.309560  | 2.500857  | 8.668572  |
| 123 | 1 | 0 | 4.812152  | 3.483152  | 8.763573  |
| 124 | 6 | 0 | 4.820231  | 1.623910  | 9.831904  |
| 125 | 1 | 0 | 5.282815  | 0.627519  | 9.711289  |
| 126 | 6 | 0 | 5.250306  | 2.224480  | 11.174663 |
| 127 | 1 | 0 | 4.898329  | 1.573389  | 11.982242 |
| 128 | 1 | 0 | 4.740586  | 3.188954  | 11.297715 |
| 129 | 6 | 0 | 6.765555  | 2.417297  | 11.244307 |
| 130 | 1 | 0 | 7.042505  | 2.864639  | 12.204744 |
| 131 | 1 | 0 | 7.260671  | 1.437866  | 11.195032 |
| 132 | 6 | 0 | 7.255601  | 3.286736  | 10.085040 |
| 133 | 1 | 0 | 8.345007  | 3.393585  | 10.117697 |
| 134 | 1 | 0 | 6.833721  | 4.295852  | 10.187539 |
| 135 | 6 | 0 | 6.828545  | 2.691789  | 8.742817  |
| 136 | 1 | 0 | 7.304453  | 1.713692  | 8.594408  |
| 137 | 1 | 0 | 7.145666  | 3.329471  | 7.910441  |
| 138 | 6 | 0 | 2.846820  | 0.399215  | 9.669233  |
| 139 | 1 | 0 | 3.454552  | -0.516190 | 9.596127  |
| 140 | 6 | 0 | 1.384592  | 0.199345  | 9.641209  |
| 141 | 6 | 0 | 0.510394  | 1.295327  | 9.639409  |
| 142 | 1 | 0 | 0.933561  | 2.296564  | 9.644431  |
| 143 | 6 | 0 | -0.864934 | 1.099419  | 9.641209  |
| 144 | 6 | 0 | -1.376983 | -0.205649 | 9.639409  |
| 145 | 1 | 0 | -2.455663 | -0.339794 | 9.644431  |
| 146 | 6 | 0 | -0.519658 | -1.298764 | 9.641209  |
| 147 | 6 | 0 | 0.866589  | -1.089678 | 9.639409  |
| 148 | 1 | 0 | 1.522102  | -1.956770 | 9.644431  |
| 149 | 6 | 0 | -1.077680 | -2.665026 | 9.669233  |
| 150 | 1 | 0 | -2.174309 | -2.733635 | 9.596127  |
| 151 | 6 | 0 | -1.003768 | -4.986397 | 9.831904  |
| 152 | 1 | 0 | -2.097960 | -4.888812 | 9.711289  |
| 153 | 6 | 0 | -0.488974 | -5.848642 | 8.668572  |
| 154 | 1 | 0 | 0.610422  | -5.909022 | 8.763573  |
| 155 | 6 | 0 | -1.083115 | -7.259588 | 8.742817  |
| 156 | 1 | 0 | -0.689426 | -7.853064 | 7.910441  |
| 157 | 1 | 0 | -2.168126 | -7.182688 | 8.594408  |
| 158 | 6 | 0 | -0.781404 | -7.926903 | 10.085040 |
| 159 | 1 | 0 | 0.303456  | -8.066102 | 10.187539 |
| 160 | 1 | 0 | -1.233573 | -8.923781 | 10.117697 |
| 161 | 6 | 0 | -1.289337 | -7.067791 | 11.244307 |
| 162 | 1 | 0 | -2.385107 | -7.006858 | 11.195032 |
| 163 | 1 | 0 | -1.040402 | -7.531308 | 12.204744 |
| 164 | 6 | 0 | -0.698697 | -5.659138 | 11.174663 |
| 165 | 1 | 0 | 0.391422  | -5.699945 | 11.297715 |
| 166 | 1 | 0 | -1.086570 | -5.028772 | 11.982242 |
| 167 | 6 | 0 | 0.037660  | -4.924784 | 6.597266  |
| 168 | 1 | 0 | 1.101249  | -5.100144 | 6.822855  |
| 169 | 7 | 0 | 2.472109  | 4.160172  | -8.450667 |
| 170 | 7 | 0 | -0.347521 | 4.648703  | -8.719230 |
| 171 | 7 | 0 | -3.643716 | 3.729579  | -3.305179 |
| 172 | 7 | 0 | -2.720247 | 2.528822  | -0.823867 |
| 173 | 6 | 0 | 3.487294  | 2.420673  | -6.392549 |

|     |   |   |           |           |            |
|-----|---|---|-----------|-----------|------------|
| 174 | 1 | 0 | 3.289586  | 3.456719  | -6.129597  |
| 175 | 6 | 0 | 3.172320  | 1.987278  | -7.688533  |
| 176 | 6 | 0 | 2.603641  | 2.920398  | -8.680695  |
| 177 | 1 | 0 | 2.315002  | 2.473073  | -9.644648  |
| 178 | 6 | 0 | 1.927506  | 4.988688  | -9.508114  |
| 179 | 1 | 0 | 1.653380  | 4.386937  | -10.393552 |
| 180 | 6 | 0 | 0.645840  | 5.666967  | -8.998313  |
| 181 | 1 | 0 | 0.913200  | 6.231748  | -8.086783  |
| 182 | 6 | 0 | 0.094054  | 6.633362  | -10.051703 |
| 183 | 1 | 0 | -0.809991 | 7.109171  | -9.656435  |
| 184 | 1 | 0 | -0.211518 | 6.047010  | -10.928012 |
| 185 | 6 | 0 | 1.134744  | 7.678680  | -10.454638 |
| 186 | 1 | 0 | 0.721456  | 8.342578  | -11.221218 |
| 187 | 1 | 0 | 1.376149  | 8.306886  | -9.586344  |
| 188 | 6 | 0 | 2.412738  | 7.005743  | -10.958628 |
| 189 | 1 | 0 | 3.168358  | 7.756428  | -11.213087 |
| 190 | 1 | 0 | 2.189694  | 6.453373  | -11.881653 |
| 191 | 6 | 0 | 2.967133  | 6.040265  | -9.910505  |
| 192 | 1 | 0 | 3.264104  | 6.591272  | -9.008658  |
| 193 | 1 | 0 | 3.862622  | 5.528999  | -10.280216 |
| 194 | 6 | 0 | -0.775530 | 4.552857  | -7.529700  |
| 195 | 1 | 0 | -0.410628 | 5.209888  | -6.724849  |
| 196 | 6 | 0 | -1.812172 | 3.578213  | -7.137039  |
| 197 | 6 | 0 | -2.296436 | 2.634122  | -8.053230  |
| 198 | 1 | 0 | -1.874046 | 2.617991  | -9.054678  |
| 199 | 6 | 0 | -3.307193 | 1.753671  | -7.688533  |
| 200 | 6 | 0 | -3.840011 | 1.809749  | -6.392549  |
| 201 | 1 | 0 | -4.638399 | 1.120506  | -6.129597  |
| 202 | 6 | 0 | -3.365082 | 2.739259  | -5.476084  |
| 203 | 6 | 0 | -2.343678 | 3.622124  | -5.854659  |
| 204 | 1 | 0 | -1.993057 | 4.350375  | -5.127989  |
| 205 | 6 | 0 | -3.976497 | 2.831072  | -4.134728  |
| 206 | 1 | 0 | -4.763162 | 2.092644  | -3.913275  |
| 207 | 6 | 0 | -4.370639 | 3.812786  | -2.052899  |
| 208 | 1 | 0 | -5.039089 | 2.944477  | -1.910267  |
| 209 | 6 | 0 | -3.369378 | 3.827752  | -0.886468  |
| 210 | 1 | 0 | -2.639550 | 4.630273  | -1.092945  |
| 211 | 6 | 0 | -4.067342 | 4.116026  | 0.445672   |
| 212 | 1 | 0 | -3.300073 | 4.192679  | 1.221128   |
| 213 | 1 | 0 | -4.705850 | 3.258133  | 0.699377   |
| 214 | 6 | 0 | -4.899712 | 5.396552  | 0.391839   |
| 215 | 1 | 0 | -4.233071 | 6.256595  | 0.236116   |
| 216 | 1 | 0 | -5.399738 | 5.552866  | 1.353381   |
| 217 | 6 | 0 | -5.917119 | 5.341248  | -0.746614  |
| 218 | 1 | 0 | -6.631205 | 4.528362  | -0.556286  |
| 219 | 1 | 0 | -6.496652 | 6.269315  | -0.795930  |
| 220 | 6 | 0 | -5.207870 | 5.098251  | -2.077413  |
| 221 | 1 | 0 | -4.537245 | 5.937618  | -2.303617  |
| 222 | 1 | 0 | -5.924061 | 5.032236  | -2.904021  |
| 223 | 6 | 0 | -1.462305 | 2.482107  | -0.979556  |
| 224 | 1 | 0 | -0.857974 | 3.390270  | -1.128708  |
| 225 | 7 | 0 | 4.199655  | -2.023389 | -8.719230  |
| 226 | 7 | 0 | 2.366760  | -4.220995 | -8.450667  |
| 227 | 7 | 0 | -3.852134 | -2.625314 | -8.719230  |
| 228 | 7 | 0 | -4.838869 | 0.060823  | -8.450667  |
| 229 | 6 | 0 | 3.429435  | 0.671711  | -8.053230  |
| 230 | 1 | 0 | 3.204270  | 0.313976  | -9.054678  |
| 231 | 6 | 0 | 4.004909  | -0.219719 | -7.137039  |
| 232 | 6 | 0 | 4.330655  | -1.604800 | -7.529700  |

|     |   |   |           |           |            |
|-----|---|---|-----------|-----------|------------|
| 233 | 1 | 0 | 4.717209  | -2.249330 | -6.724849  |
| 234 | 6 | 0 | 4.584817  | -3.392797 | -8.998313  |
| 235 | 1 | 0 | 4.940252  | -3.906728 | -8.086783  |
| 236 | 6 | 0 | 3.356578  | -4.163613 | -9.508114  |
| 237 | 1 | 0 | 2.972509  | -3.625338 | -10.393552 |
| 238 | 6 | 0 | 3.747456  | -5.589745 | -9.910505  |
| 239 | 1 | 0 | 2.856943  | -6.109628 | -10.280216 |
| 240 | 1 | 0 | 4.076157  | -6.122433 | -9.008658  |
| 241 | 6 | 0 | 4.860782  | -5.592364 | -10.958628 |
| 242 | 1 | 0 | 5.133085  | -6.622092 | -11.213087 |
| 243 | 1 | 0 | 4.493938  | -5.123017 | -11.881653 |
| 244 | 6 | 0 | 6.082560  | -4.822057 | -10.454638 |
| 245 | 1 | 0 | 6.864156  | -4.796088 | -11.221218 |
| 246 | 1 | 0 | 6.505900  | -5.345223 | -9.586344  |
| 247 | 6 | 0 | 5.697633  | -3.398134 | -10.051703 |
| 248 | 1 | 0 | 5.342623  | -2.840325 | -10.928012 |
| 249 | 1 | 0 | 6.561718  | -2.853113 | -9.656435  |
| 250 | 6 | 0 | 1.227318  | -3.715018 | -8.680695  |
| 251 | 1 | 0 | 0.984243  | -3.241387 | -9.644648  |
| 252 | 6 | 0 | 0.134873  | -3.740949 | -7.688533  |
| 253 | 6 | 0 | 0.352717  | -4.230422 | -6.392549  |
| 254 | 1 | 0 | 1.348813  | -4.577225 | -6.129597  |
| 255 | 6 | 0 | -0.689727 | -4.283876 | -5.476084  |
| 256 | 6 | 0 | -1.965012 | -3.840747 | -5.854659  |
| 257 | 1 | 0 | -2.771007 | -3.901225 | -5.127989  |
| 258 | 6 | 0 | -2.192737 | -3.358493 | -7.137039  |
| 259 | 6 | 0 | -1.132999 | -3.305833 | -8.053230  |
| 260 | 1 | 0 | -1.330224 | -2.931967 | -9.054678  |
| 261 | 6 | 0 | -3.555125 | -2.948057 | -7.529700  |
| 262 | 1 | 0 | -4.306581 | -2.960558 | -6.724849  |
| 263 | 6 | 0 | -5.230657 | -2.274170 | -8.998313  |
| 264 | 1 | 0 | -5.853452 | -2.325020 | -8.086783  |
| 265 | 6 | 0 | -5.284084 | -0.825075 | -9.508114  |
| 266 | 1 | 0 | -4.625889 | -0.761599 | -10.393552 |
| 267 | 6 | 0 | -6.714589 | -0.450520 | -9.910505  |
| 268 | 1 | 0 | -6.719565 | 0.580629  | -10.280216 |
| 269 | 1 | 0 | -7.340261 | -0.468839 | -9.008658  |
| 270 | 6 | 0 | -7.273520 | -1.413379 | -10.958628 |
| 271 | 1 | 0 | -6.683632 | -1.330356 | -11.881653 |
| 272 | 1 | 0 | -8.301443 | -1.134335 | -11.213087 |
| 273 | 6 | 0 | -7.217304 | -2.856623 | -10.454638 |
| 274 | 1 | 0 | -7.882049 | -2.961663 | -9.586344  |
| 275 | 1 | 0 | -7.585612 | -3.546490 | -11.221218 |
| 276 | 6 | 0 | -5.791687 | -3.235228 | -10.051703 |
| 277 | 1 | 0 | -5.131105 | -3.206685 | -10.928012 |
| 278 | 1 | 0 | -5.751727 | -4.256058 | -9.656435  |
| 279 | 6 | 0 | -3.830959 | 0.794620  | -8.680695  |
| 280 | 1 | 0 | -3.299245 | 0.768314  | -9.644648  |
| 281 | 7 | 0 | 5.051768  | 1.290761  | -3.305179  |
| 282 | 7 | 0 | 3.550148  | 1.091392  | -0.823867  |
| 283 | 7 | 0 | -0.829901 | -3.620214 | -0.823867  |
| 284 | 7 | 0 | -1.408052 | -5.020340 | -3.305179  |
| 285 | 6 | 0 | 4.308690  | 0.218623  | -5.854659  |
| 286 | 1 | 0 | 4.764064  | -0.449149 | -5.127989  |
| 287 | 6 | 0 | 4.054809  | 1.544617  | -5.476084  |
| 288 | 6 | 0 | 4.440029  | 2.028211  | -4.134728  |
| 289 | 1 | 0 | 4.193864  | 3.078697  | -3.913275  |
| 290 | 6 | 0 | 5.487289  | 1.878691  | -2.052899  |
| 291 | 1 | 0 | 5.069536  | 2.891741  | -1.910267  |

|     |   |   |           |           |           |
|-----|---|---|-----------|-----------|-----------|
| 292 | 6 | 0 | 4.999619  | 1.004091  | -0.886468 |
| 293 | 1 | 0 | 5.329709  | -0.029219 | -1.092945 |
| 294 | 6 | 0 | 5.598254  | 1.464409  | 0.445672  |
| 295 | 1 | 0 | 5.281003  | 0.761608  | 1.221128  |
| 296 | 1 | 0 | 5.174551  | 2.446319  | 0.699377  |
| 297 | 6 | 0 | 7.123407  | 1.544999  | 0.391839  |
| 298 | 1 | 0 | 7.508792  | 1.899877  | 1.353381  |
| 299 | 1 | 0 | 7.534906  | 0.537650  | 0.236116  |
| 300 | 6 | 0 | 7.584216  | 2.453751  | -0.746614 |
| 301 | 1 | 0 | 8.677712  | 2.491608  | -0.795930 |
| 302 | 1 | 0 | 7.237279  | 3.478611  | -0.556286 |
| 303 | 6 | 0 | 7.019150  | 1.961022  | -2.077413 |
| 304 | 1 | 0 | 7.410751  | 0.960560  | -2.303617 |
| 305 | 1 | 0 | 7.320075  | 2.614269  | -2.904021 |
| 306 | 6 | 0 | 2.880720  | 0.025340  | -0.979556 |
| 307 | 1 | 0 | 3.365047  | -0.952108 | -1.128708 |
| 308 | 6 | 0 | 1.401569  | 0.017135  | -0.960037 |
| 309 | 6 | 0 | 0.675106  | 1.217147  | -0.965690 |
| 310 | 1 | 0 | 1.222690  | 2.156126  | -1.001880 |
| 311 | 6 | 0 | -0.715624 | 1.205227  | -0.960037 |
| 312 | 6 | 0 | -1.391633 | -0.023915 | -0.965690 |
| 313 | 1 | 0 | -2.478605 | -0.019182 | -1.001880 |
| 314 | 6 | 0 | -0.685945 | -1.222362 | -0.960037 |
| 315 | 6 | 0 | 0.716527  | -1.193232 | -0.965690 |
| 316 | 1 | 0 | 1.255915  | -2.136944 | -1.001880 |
| 317 | 6 | 0 | -1.418415 | -2.507447 | -0.979556 |
| 318 | 1 | 0 | -2.507073 | -2.438162 | -1.128708 |
| 319 | 6 | 0 | -1.630241 | -4.831843 | -0.886468 |
| 320 | 1 | 0 | -2.690159 | -4.601054 | -1.092945 |
| 321 | 6 | 0 | -1.116650 | -5.691477 | -2.052899 |
| 322 | 1 | 0 | -0.030447 | -5.836218 | -1.910267 |
| 323 | 6 | 0 | -1.811280 | -7.059273 | -2.077413 |
| 324 | 1 | 0 | -1.396014 | -7.646505 | -2.904021 |
| 325 | 1 | 0 | -2.873506 | -6.898178 | -2.303617 |
| 326 | 6 | 0 | -1.667097 | -7.794999 | -0.746614 |
| 327 | 1 | 0 | -0.606074 | -8.006973 | -0.556286 |
| 328 | 1 | 0 | -2.181060 | -8.760923 | -0.795930 |
| 329 | 6 | 0 | -2.223695 | -6.941551 | 0.391839  |
| 330 | 1 | 0 | -3.301835 | -6.794245 | 0.236116  |
| 331 | 1 | 0 | -2.109054 | -7.452743 | 1.353381  |
| 332 | 6 | 0 | -1.530912 | -5.580434 | 0.445672  |
| 333 | 1 | 0 | -0.468701 | -5.704452 | 0.699377  |
| 334 | 1 | 0 | -1.980930 | -4.954287 | 1.221128  |
| 335 | 6 | 0 | -0.463532 | -4.859283 | -4.134728 |
| 336 | 1 | 0 | 0.569298  | -5.171341 | -3.913275 |

(CC3-R)2 a-to-a D3 cc3-rdim9

Standard orientation:

| Center<br>Number | Atomic<br>Number | Atomic<br>Type | Coordinates (Angstroms) |           |          |
|------------------|------------------|----------------|-------------------------|-----------|----------|
|                  |                  |                | X                       | Y         | Z        |
| 1                | 7                | 0              | -3.248500               | -3.589567 | 8.873944 |
| 2                | 7                | 0              | -0.572252               | -4.633516 | 9.129856 |
| 3                | 7                | 0              | 2.952895                | -4.477559 | 3.760726 |
| 4                | 7                | 0              | 2.258128                | -2.942850 | 1.419873 |
| 5                | 6                | 0              | -3.967932               | -1.694562 | 6.833158 |
| 6                | 1                | 0              | -3.975148               | -2.750008 | 6.573303 |

|    |   |   |           |           |           |
|----|---|---|-----------|-----------|-----------|
| 7  | 6 | 0 | -3.546750 | -1.324628 | 8.118266  |
| 8  | 6 | 0 | -3.146904 | -2.347199 | 9.105202  |
| 9  | 1 | 0 | -2.771151 | -1.961917 | 10.065925 |
| 10 | 6 | 0 | -2.866561 | -4.507876 | 9.928666  |
| 11 | 1 | 0 | -2.469955 | -3.970981 | 10.809445 |
| 12 | 6 | 0 | -1.750679 | -5.429423 | 9.411721  |
| 13 | 1 | 0 | -2.129746 | -5.928569 | 8.501510  |
| 14 | 6 | 0 | -1.397904 | -6.488118 | 10.462523 |
| 15 | 1 | 0 | -0.611316 | -7.136059 | 10.060745 |
| 16 | 1 | 0 | -0.973505 | -5.975795 | 11.335812 |
| 17 | 6 | 0 | -2.624401 | -7.302360 | 10.875295 |
| 18 | 1 | 0 | -2.346547 | -8.036456 | 11.638955 |
| 19 | 1 | 0 | -2.995122 | -7.868365 | 10.009831 |
| 20 | 6 | 0 | -3.735421 | -6.385351 | 11.389317 |
| 21 | 1 | 0 | -4.624913 | -6.967633 | 11.652048 |
| 22 | 1 | 0 | -3.397027 | -5.888922 | 12.309030 |
| 23 | 6 | 0 | -4.092701 | -5.328851 | 10.343458 |
| 24 | 1 | 0 | -4.502526 | -5.809806 | 9.445711  |
| 25 | 1 | 0 | -4.863592 | -4.647127 | 10.718895 |
| 26 | 6 | 0 | -0.108660 | -4.659478 | 7.950157  |
| 27 | 1 | 0 | -0.580820 | -5.252249 | 7.151215  |
| 28 | 6 | 0 | 1.109629  | -3.920583 | 7.563665  |
| 29 | 6 | 0 | 1.753153  | -3.072121 | 8.475660  |
| 30 | 1 | 0 | 1.324126  | -2.955564 | 9.467575  |
| 31 | 6 | 0 | 2.920537  | -2.409262 | 8.118266  |
| 32 | 6 | 0 | 3.451499  | -2.589049 | 6.833158  |
| 33 | 1 | 0 | 4.369151  | -2.067575 | 6.573303  |
| 34 | 6 | 0 | 2.821944  | -3.427445 | 5.921759  |
| 35 | 6 | 0 | 1.644272  | -4.091584 | 6.292912  |
| 36 | 1 | 0 | 1.169052  | -4.748703 | 5.569099  |
| 37 | 6 | 0 | 3.417692  | -3.635978 | 4.587155  |
| 38 | 1 | 0 | 4.306081  | -3.026016 | 4.360587  |
| 39 | 6 | 0 | 3.640042  | -4.632527 | 2.493674  |
| 40 | 1 | 0 | 4.481347  | -3.922141 | 2.399434  |
| 41 | 6 | 0 | 2.657291  | -4.334770 | 1.350338  |
| 42 | 1 | 0 | 1.792065  | -5.011092 | 1.474011  |
| 43 | 6 | 0 | 3.317431  | -4.597097 | -0.007922 |
| 44 | 1 | 0 | 2.589949  | -4.389336 | -0.800120 |
| 45 | 1 | 0 | 4.138959  | -3.879811 | -0.133683 |
| 46 | 6 | 0 | 3.848136  | -6.027397 | -0.109193 |
| 47 | 1 | 0 | 3.007969  | -6.733211 | -0.056544 |
| 48 | 1 | 0 | 4.330027  | -6.179838 | -1.080697 |
| 49 | 6 | 0 | 4.825858  | -6.324225 | 1.028981  |
| 50 | 1 | 0 | 5.710116  | -5.681196 | 0.922082  |
| 51 | 1 | 0 | 5.178165  | -7.359669 | 0.974094  |
| 52 | 6 | 0 | 4.171062  | -6.066392 | 2.386341  |
| 53 | 1 | 0 | 3.329655  | -6.755371 | 2.536561  |
| 54 | 1 | 0 | 4.877135  | -6.243666 | 3.204881  |
| 55 | 6 | 0 | 1.022486  | -2.686762 | 1.541886  |
| 56 | 1 | 0 | 0.265585  | -3.483959 | 1.606673  |
| 57 | 7 | 0 | -3.726617 | 2.812343  | 9.129856  |
| 58 | 7 | 0 | -1.484407 | 4.608067  | 8.873944  |
| 59 | 7 | 0 | 4.298868  | 1.821173  | 9.129856  |
| 60 | 7 | 0 | 4.732907  | -1.018500 | 8.873944  |
| 61 | 6 | 0 | -3.537111 | 0.017785  | 8.475660  |
| 62 | 1 | 0 | -3.221656 | 0.331055  | 9.467575  |
| 63 | 6 | 0 | -3.950139 | 0.999324  | 7.563665  |
| 64 | 6 | 0 | -3.980896 | 2.423842  | 7.950157  |
| 65 | 1 | 0 | -4.258171 | 3.129129  | 7.151215  |

|     |   |   |           |           |           |
|-----|---|---|-----------|-----------|-----------|
| 66  | 6 | 0 | -3.826679 | 4.230844  | 9.411721  |
| 67  | 1 | 0 | -4.069419 | 4.808699  | 8.501510  |
| 68  | 6 | 0 | -2.470654 | 4.736453  | 9.928666  |
| 69  | 1 | 0 | -2.203993 | 4.124535  | 10.809445 |
| 70  | 6 | 0 | -2.568569 | 6.208809  | 10.343458 |
| 71  | 1 | 0 | -1.592734 | 6.535558  | 10.718895 |
| 72  | 1 | 0 | -2.780177 | 6.804205  | 9.445711  |
| 73  | 6 | 0 | -3.662166 | 6.427645  | 11.389317 |
| 74  | 1 | 0 | -3.721691 | 7.489109  | 11.652048 |
| 75  | 1 | 0 | -3.401442 | 5.886373  | 12.309030 |
| 76  | 6 | 0 | -5.011829 | 5.923977  | 10.875295 |
| 77  | 1 | 0 | -5.786501 | 6.050398  | 11.638955 |
| 78  | 1 | 0 | -5.316643 | 6.528035  | 10.009831 |
| 79  | 6 | 0 | -4.919923 | 4.454680  | 10.462523 |
| 80  | 1 | 0 | -4.688438 | 3.830978  | 11.335812 |
| 81  | 1 | 0 | -5.874350 | 4.097444  | 10.060745 |
| 82  | 6 | 0 | -0.459282 | 3.898898  | 9.105202  |
| 83  | 1 | 0 | -0.313495 | 3.380846  | 10.065925 |
| 84  | 6 | 0 | 0.626214  | 3.733890  | 8.118266  |
| 85  | 6 | 0 | 0.516433  | 4.283611  | 6.833158  |
| 86  | 1 | 0 | -0.394003 | 4.817583  | 6.573303  |
| 87  | 6 | 0 | 1.557282  | 4.157597  | 5.921759  |
| 88  | 6 | 0 | 2.721280  | 3.469773  | 6.292912  |
| 89  | 1 | 0 | 3.527972  | 3.386780  | 5.569099  |
| 90  | 6 | 0 | 2.840510  | 2.921259  | 7.563665  |
| 91  | 6 | 0 | 1.783958  | 3.054336  | 8.475660  |
| 92  | 1 | 0 | 1.897530  | 2.624509  | 9.467575  |
| 93  | 6 | 0 | 4.089556  | 2.235636  | 7.950157  |
| 94  | 1 | 0 | 4.838991  | 2.123119  | 7.151215  |
| 95  | 6 | 0 | 5.577358  | 1.198579  | 9.411721  |
| 96  | 1 | 0 | 6.199165  | 1.119871  | 8.501510  |
| 97  | 6 | 0 | 5.337216  | -0.228577 | 9.928666  |
| 98  | 1 | 0 | 4.673948  | -0.153553 | 10.809445 |
| 99  | 6 | 0 | 6.661271  | -0.879958 | 10.343458 |
| 100 | 1 | 0 | 6.456326  | -1.888431 | 10.718895 |
| 101 | 1 | 0 | 7.282702  | -0.994399 | 9.445711  |
| 102 | 6 | 0 | 7.397587  | -0.042294 | 11.389317 |
| 103 | 1 | 0 | 6.798469  | 0.002549  | 12.309030 |
| 104 | 1 | 0 | 8.346604  | -0.521476 | 11.652048 |
| 105 | 6 | 0 | 7.636229  | 1.378382  | 10.875295 |
| 106 | 1 | 0 | 8.311765  | 1.340330  | 10.009831 |
| 107 | 1 | 0 | 8.133049  | 1.986058  | 11.638955 |
| 108 | 6 | 0 | 6.317827  | 2.033439  | 10.462523 |
| 109 | 1 | 0 | 5.661943  | 2.144818  | 11.335812 |
| 110 | 1 | 0 | 6.485666  | 3.038614  | 10.060745 |
| 111 | 6 | 0 | 3.606186  | -1.551699 | 9.105202  |
| 112 | 1 | 0 | 3.084646  | -1.418928 | 10.065925 |
| 113 | 7 | 0 | -5.354128 | -0.318502 | 3.760726  |
| 114 | 7 | 0 | -3.677647 | -0.484171 | 1.419873  |
| 115 | 7 | 0 | 1.419519  | 3.427022  | 1.419873  |
| 116 | 7 | 0 | 2.401233  | 4.796062  | 3.760726  |
| 117 | 6 | 0 | -4.365552 | 0.621811  | 6.292912  |
| 118 | 1 | 0 | -4.697023 | 1.361923  | 5.569099  |
| 119 | 6 | 0 | -4.379226 | -0.730153 | 5.921759  |
| 120 | 6 | 0 | -4.857695 | -1.141819 | 4.587155  |
| 121 | 1 | 0 | -4.773647 | -2.216167 | 4.360587  |
| 122 | 6 | 0 | -5.831907 | -0.836105 | 2.493674  |
| 123 | 1 | 0 | -5.637347 | -1.919889 | 2.399434  |
| 124 | 6 | 0 | -5.082666 | -0.133897 | 1.350338  |

|     |   |   |           |           |            |
|-----|---|---|-----------|-----------|------------|
| 125 | 1 | 0 | -5.235766 | 0.953572  | 1.474011   |
| 126 | 6 | 0 | -5.639918 | -0.574431 | -0.007922  |
| 127 | 1 | 0 | -5.096251 | -0.048293 | -0.800120  |
| 128 | 1 | 0 | -5.429494 | -1.644538 | -0.133683  |
| 129 | 6 | 0 | -7.143947 | -0.318885 | -0.109193  |
| 130 | 1 | 0 | -7.516910 | -0.659995 | -1.080697  |
| 131 | 1 | 0 | -7.335117 | 0.761628  | -0.056544  |
| 132 | 6 | 0 | -7.889869 | -1.017203 | 1.028981   |
| 133 | 1 | 0 | -8.962743 | -0.804588 | 0.974094   |
| 134 | 1 | 0 | -7.775118 | -2.104507 | 0.922082   |
| 135 | 6 | 0 | -7.339180 | -0.579050 | 2.386341   |
| 136 | 1 | 0 | -7.515151 | 0.494119  | 2.536561   |
| 137 | 1 | 0 | -7.845741 | -1.101890 | 3.204881   |
| 138 | 6 | 0 | -2.838047 | 0.457882  | 1.541886   |
| 139 | 1 | 0 | -3.149989 | 1.511977  | 1.606673   |
| 140 | 6 | 0 | -1.381821 | 0.218156  | 1.580710   |
| 141 | 6 | 0 | -0.869905 | -1.087097 | 1.582669   |
| 142 | 1 | 0 | -1.569658 | -1.918857 | 1.574423   |
| 143 | 6 | 0 | 0.501982  | -1.305770 | 1.580710   |
| 144 | 6 | 0 | 1.376407  | -0.209812 | 1.582669   |
| 145 | 1 | 0 | 2.446608  | -0.399935 | 1.574423   |
| 146 | 6 | 0 | 0.879839  | 1.087614  | 1.580710   |
| 147 | 6 | 0 | -0.506501 | 1.296909  | 1.582669   |
| 148 | 1 | 0 | -0.876950 | 2.318792  | 1.574423   |
| 149 | 6 | 0 | 1.815561  | 2.228880  | 1.541886   |
| 150 | 1 | 0 | 2.884405  | 1.971983  | 1.606673   |
| 151 | 6 | 0 | 2.425375  | 4.468667  | 1.350338   |
| 152 | 1 | 0 | 3.443701  | 4.057520  | 1.474011   |
| 153 | 6 | 0 | 2.191865  | 5.468632  | 2.493674   |
| 154 | 1 | 0 | 1.156001  | 5.842031  | 2.399434   |
| 155 | 6 | 0 | 3.168118  | 6.645441  | 2.386341   |
| 156 | 1 | 0 | 2.968606  | 7.345556  | 3.204881   |
| 157 | 1 | 0 | 4.185495  | 6.261252  | 2.536561   |
| 158 | 6 | 0 | 3.064011  | 7.341429  | 1.028981   |
| 159 | 1 | 0 | 2.065002  | 7.785703  | 0.922082   |
| 160 | 1 | 0 | 3.784578  | 8.164257  | 0.974094   |
| 161 | 6 | 0 | 3.295811  | 6.346282  | -0.109193  |
| 162 | 1 | 0 | 4.327147  | 5.971584  | -0.056544  |
| 163 | 1 | 0 | 3.186883  | 6.839832  | -1.080697  |
| 164 | 6 | 0 | 2.322487  | 5.171528  | -0.007922  |
| 165 | 1 | 0 | 1.290535  | 5.524349  | -0.133683  |
| 166 | 1 | 0 | 2.506302  | 4.437630  | -0.800120  |
| 167 | 6 | 0 | 1.440003  | 4.777797  | 4.587155   |
| 168 | 1 | 0 | 0.467566  | 5.242183  | 4.360587   |
| 169 | 7 | 0 | -4.732907 | -1.018500 | -8.873944  |
| 170 | 7 | 0 | -4.298868 | 1.821173  | -9.129856  |
| 171 | 7 | 0 | -2.401233 | 4.796062  | -3.760726  |
| 172 | 7 | 0 | -1.419519 | 3.427022  | -1.419873  |
| 173 | 6 | 0 | -3.451499 | -2.589049 | -6.833158  |
| 174 | 1 | 0 | -4.369151 | -2.067575 | -6.573303  |
| 175 | 6 | 0 | -2.920537 | -2.409262 | -8.118266  |
| 176 | 6 | 0 | -3.606186 | -1.551699 | -9.105202  |
| 177 | 1 | 0 | -3.084646 | -1.418928 | -10.065925 |
| 178 | 6 | 0 | -5.337216 | -0.228577 | -9.928666  |
| 179 | 1 | 0 | -4.673948 | -0.153553 | -10.809445 |
| 180 | 6 | 0 | -5.577358 | 1.198579  | -9.411721  |
| 181 | 1 | 0 | -6.199165 | 1.119871  | -8.501510  |
| 182 | 6 | 0 | -6.317827 | 2.033439  | -10.462523 |
| 183 | 1 | 0 | -6.485666 | 3.038614  | -10.060745 |

|     |   |   |           |           |            |
|-----|---|---|-----------|-----------|------------|
| 184 | 1 | 0 | -5.661943 | 2.144818  | -11.335812 |
| 185 | 6 | 0 | -7.636229 | 1.378382  | -10.875295 |
| 186 | 1 | 0 | -8.133049 | 1.986058  | -11.638955 |
| 187 | 1 | 0 | -8.311765 | 1.340330  | -10.009831 |
| 188 | 6 | 0 | -7.397587 | -0.042294 | -11.389317 |
| 189 | 1 | 0 | -8.346604 | -0.521476 | -11.652048 |
| 190 | 1 | 0 | -6.798469 | 0.002549  | -12.309030 |
| 191 | 6 | 0 | -6.661271 | -0.879958 | -10.343458 |
| 192 | 1 | 0 | -7.282702 | -0.994399 | -9.445711  |
| 193 | 1 | 0 | -6.456326 | -1.888431 | -10.718895 |
| 194 | 6 | 0 | -4.089556 | 2.235636  | -7.950157  |
| 195 | 1 | 0 | -4.838991 | 2.123119  | -7.151215  |
| 196 | 6 | 0 | -2.840510 | 2.921259  | -7.563665  |
| 197 | 6 | 0 | -1.783958 | 3.054336  | -8.475660  |
| 198 | 1 | 0 | -1.897530 | 2.624509  | -9.467575  |
| 199 | 6 | 0 | -0.626214 | 3.733890  | -8.118266  |
| 200 | 6 | 0 | -0.516433 | 4.283611  | -6.833158  |
| 201 | 1 | 0 | 0.394003  | 4.817583  | -6.573303  |
| 202 | 6 | 0 | -1.557282 | 4.157597  | -5.921759  |
| 203 | 6 | 0 | -2.721280 | 3.469773  | -6.292912  |
| 204 | 1 | 0 | -3.527972 | 3.386780  | -5.569099  |
| 205 | 6 | 0 | -1.440003 | 4.777797  | -4.587155  |
| 206 | 1 | 0 | -0.467566 | 5.242183  | -4.360587  |
| 207 | 6 | 0 | -2.191865 | 5.468632  | -2.493674  |
| 208 | 1 | 0 | -1.156001 | 5.842031  | -2.399434  |
| 209 | 6 | 0 | -2.425375 | 4.468667  | -1.350338  |
| 210 | 1 | 0 | -3.443701 | 4.057520  | -1.474011  |
| 211 | 6 | 0 | -2.322487 | 5.171528  | 0.007922   |
| 212 | 1 | 0 | -2.506302 | 4.437630  | 0.800120   |
| 213 | 1 | 0 | -1.290535 | 5.524349  | 0.133683   |
| 214 | 6 | 0 | -3.295811 | 6.346282  | 0.109193   |
| 215 | 1 | 0 | -4.327147 | 5.971584  | 0.056544   |
| 216 | 1 | 0 | -3.186883 | 6.839832  | 1.080697   |
| 217 | 6 | 0 | -3.064011 | 7.341429  | -1.028981  |
| 218 | 1 | 0 | -2.065002 | 7.785703  | -0.922082  |
| 219 | 1 | 0 | -3.784578 | 8.164257  | -0.974094  |
| 220 | 6 | 0 | -3.168118 | 6.645441  | -2.386341  |
| 221 | 1 | 0 | -4.185495 | 6.261252  | -2.536561  |
| 222 | 1 | 0 | -2.968606 | 7.345556  | -3.204881  |
| 223 | 6 | 0 | -1.815561 | 2.228880  | -1.541886  |
| 224 | 1 | 0 | -2.884405 | 1.971983  | -1.606673  |
| 225 | 7 | 0 | 0.572252  | -4.633516 | -9.129856  |
| 226 | 7 | 0 | 3.248500  | -3.589567 | -8.873944  |
| 227 | 7 | 0 | 3.726617  | 2.812343  | -9.129856  |
| 228 | 7 | 0 | 1.484407  | 4.608067  | -8.873944  |
| 229 | 6 | 0 | -1.753153 | -3.072121 | -8.475660  |
| 230 | 1 | 0 | -1.324126 | -2.955564 | -9.467575  |
| 231 | 6 | 0 | -1.109629 | -3.920583 | -7.563665  |
| 232 | 6 | 0 | 0.108660  | -4.659478 | -7.950157  |
| 233 | 1 | 0 | 0.580820  | -5.252249 | -7.151215  |
| 234 | 6 | 0 | 1.750679  | -5.429423 | -9.411721  |
| 235 | 1 | 0 | 2.129746  | -5.928569 | -8.501510  |
| 236 | 6 | 0 | 2.866561  | -4.507876 | -9.928666  |
| 237 | 1 | 0 | 2.469955  | -3.970981 | -10.809445 |
| 238 | 6 | 0 | 4.092701  | -5.328851 | -10.343458 |
| 239 | 1 | 0 | 4.863592  | -4.647127 | -10.718895 |
| 240 | 1 | 0 | 4.502526  | -5.809806 | -9.445711  |
| 241 | 6 | 0 | 3.735421  | -6.385351 | -11.389317 |
| 242 | 1 | 0 | 4.624913  | -6.967633 | -11.652048 |



|     |   |   |           |           |            |
|-----|---|---|-----------|-----------|------------|
| 243 | 1 | 0 | 3.397027  | -5.888922 | -12.309030 |
| 244 | 6 | 0 | 2.624401  | -7.302360 | -10.875295 |
| 245 | 1 | 0 | 2.346547  | -8.036456 | -11.638955 |
| 246 | 1 | 0 | 2.995122  | -7.868365 | -10.009831 |
| 247 | 6 | 0 | 1.397904  | -6.488118 | -10.462523 |
| 248 | 1 | 0 | 0.973505  | -5.975795 | -11.335812 |
| 249 | 1 | 0 | 0.611316  | -7.136059 | -10.060745 |
| 250 | 6 | 0 | 3.146904  | -2.347199 | -9.105202  |
| 251 | 1 | 0 | 2.771151  | -1.961917 | -10.065925 |
| 252 | 6 | 0 | 3.546750  | -1.324628 | -8.118266  |
| 253 | 6 | 0 | 3.967932  | -1.694562 | -6.833158  |
| 254 | 1 | 0 | 3.975148  | -2.750008 | -6.573303  |
| 255 | 6 | 0 | 4.379226  | -0.730153 | -5.921759  |
| 256 | 6 | 0 | 4.365552  | 0.621811  | -6.292912  |
| 257 | 1 | 0 | 4.697023  | 1.361923  | -5.569099  |
| 258 | 6 | 0 | 3.950139  | 0.999324  | -7.563665  |
| 259 | 6 | 0 | 3.537111  | 0.017785  | -8.475660  |
| 260 | 1 | 0 | 3.221656  | 0.331055  | -9.467575  |
| 261 | 6 | 0 | 3.980896  | 2.423842  | -7.950157  |
| 262 | 1 | 0 | 4.258171  | 3.129129  | -7.151215  |
| 263 | 6 | 0 | 3.826679  | 4.230844  | -9.411721  |
| 264 | 1 | 0 | 4.069419  | 4.808699  | -8.501510  |
| 265 | 6 | 0 | 2.470654  | 4.736453  | -9.928666  |
| 266 | 1 | 0 | 2.203993  | 4.124535  | -10.809445 |
| 267 | 6 | 0 | 2.568569  | 6.208809  | -10.343458 |
| 268 | 1 | 0 | 1.592734  | 6.535558  | -10.718895 |
| 269 | 1 | 0 | 2.780177  | 6.804205  | -9.445711  |
| 270 | 6 | 0 | 3.662166  | 6.427645  | -11.389317 |
| 271 | 1 | 0 | 3.401442  | 5.886373  | -12.309030 |
| 272 | 1 | 0 | 3.721691  | 7.489109  | -11.652048 |
| 273 | 6 | 0 | 5.011829  | 5.923977  | -10.875295 |
| 274 | 1 | 0 | 5.316643  | 6.528035  | -10.009831 |
| 275 | 1 | 0 | 5.786501  | 6.050398  | -11.638955 |
| 276 | 6 | 0 | 4.919923  | 4.454680  | -10.462523 |
| 277 | 1 | 0 | 4.688438  | 3.830978  | -11.335812 |
| 278 | 1 | 0 | 5.874350  | 4.097444  | -10.060745 |
| 279 | 6 | 0 | 0.459282  | 3.898898  | -9.105202  |
| 280 | 1 | 0 | 0.313495  | 3.380846  | -10.065925 |
| 281 | 7 | 0 | -2.952895 | -4.477559 | -3.760726  |
| 282 | 7 | 0 | -2.258128 | -2.942850 | -1.419873  |
| 283 | 7 | 0 | 3.677647  | -0.484171 | -1.419873  |
| 284 | 7 | 0 | 5.354128  | -0.318502 | -3.760726  |
| 285 | 6 | 0 | -1.644272 | -4.091584 | -6.292912  |
| 286 | 1 | 0 | -1.169052 | -4.748703 | -5.569099  |
| 287 | 6 | 0 | -2.821944 | -3.427445 | -5.921759  |
| 288 | 6 | 0 | -3.417692 | -3.635978 | -4.587155  |
| 289 | 1 | 0 | -4.306081 | -3.026016 | -4.360587  |
| 290 | 6 | 0 | -3.640042 | -4.632527 | -2.493674  |
| 291 | 1 | 0 | -4.481347 | -3.922141 | -2.399434  |
| 292 | 6 | 0 | -2.657291 | -4.334770 | -1.350338  |
| 293 | 1 | 0 | -1.792065 | -5.011092 | -1.474011  |
| 294 | 6 | 0 | -3.317431 | -4.597097 | 0.007922   |
| 295 | 1 | 0 | -2.589949 | -4.389336 | 0.800120   |
| 296 | 1 | 0 | -4.138959 | -3.879811 | 0.133683   |
| 297 | 6 | 0 | -3.848136 | -6.027397 | 0.109193   |
| 298 | 1 | 0 | -4.330027 | -6.179838 | 1.080697   |
| 299 | 1 | 0 | -3.007969 | -6.733211 | 0.056544   |
| 300 | 6 | 0 | -4.825858 | -6.324225 | -1.028981  |
| 301 | 1 | 0 | -5.178165 | -7.359669 | -0.974094  |

|     |   |   |           |           |           |
|-----|---|---|-----------|-----------|-----------|
| 302 | 1 | 0 | -5.710116 | -5.681196 | -0.922082 |
| 303 | 6 | 0 | -4.171062 | -6.066392 | -2.386341 |
| 304 | 1 | 0 | -3.329655 | -6.755371 | -2.536561 |
| 305 | 1 | 0 | -4.877135 | -6.243666 | -3.204881 |
| 306 | 6 | 0 | -1.022486 | -2.686762 | -1.541886 |
| 307 | 1 | 0 | -0.265585 | -3.483959 | -1.606673 |
| 308 | 6 | 0 | -0.501982 | -1.305770 | -1.580710 |
| 309 | 6 | 0 | -1.376407 | -0.209812 | -1.582669 |
| 310 | 1 | 0 | -2.446608 | -0.399935 | -1.574423 |
| 311 | 6 | 0 | -0.879839 | 1.087614  | -1.580710 |
| 312 | 6 | 0 | 0.506501  | 1.296909  | -1.582669 |
| 313 | 1 | 0 | 0.876950  | 2.318792  | -1.574423 |
| 314 | 6 | 0 | 1.381821  | 0.218156  | -1.580710 |
| 315 | 6 | 0 | 0.869905  | -1.087097 | -1.582669 |
| 316 | 1 | 0 | 1.569658  | -1.918857 | -1.574423 |
| 317 | 6 | 0 | 2.838047  | 0.457882  | -1.541886 |
| 318 | 1 | 0 | 3.149989  | 1.511977  | -1.606673 |
| 319 | 6 | 0 | 5.082666  | -0.133897 | -1.350338 |
| 320 | 1 | 0 | 5.235766  | 0.953572  | -1.474011 |
| 321 | 6 | 0 | 5.831907  | -0.836105 | -2.493674 |
| 322 | 1 | 0 | 5.637347  | -1.919889 | -2.399434 |
| 323 | 6 | 0 | 7.339180  | -0.579050 | -2.386341 |
| 324 | 1 | 0 | 7.845741  | -1.101890 | -3.204881 |
| 325 | 1 | 0 | 7.515151  | 0.494119  | -2.536561 |
| 326 | 6 | 0 | 7.889869  | -1.017203 | -1.028981 |
| 327 | 1 | 0 | 7.775118  | -2.104507 | -0.922082 |
| 328 | 1 | 0 | 8.962743  | -0.804588 | -0.974094 |
| 329 | 6 | 0 | 7.143947  | -0.318885 | 0.109193  |
| 330 | 1 | 0 | 7.335117  | 0.761628  | 0.056544  |
| 331 | 1 | 0 | 7.516910  | -0.659995 | 1.080697  |
| 332 | 6 | 0 | 5.639918  | -0.574431 | 0.007922  |
| 333 | 1 | 0 | 5.429494  | -1.644538 | 0.133683  |
| 334 | 1 | 0 | 5.096251  | -0.048293 | 0.800120  |
| 335 | 6 | 0 | 4.857695  | -1.141819 | -4.587155 |
| 336 | 1 | 0 | 4.773647  | -2.216167 | -4.360587 |

-----

CC3-R/S w-to-w S6 cc3-rdim4

| Center<br>Number | Atomic<br>Number | Atomic<br>Type | Coordinates (Angstroms) |           |           |
|------------------|------------------|----------------|-------------------------|-----------|-----------|
|                  |                  |                | X                       | Y         | Z         |
| 1                | 7                | 0              | -4.507979               | 1.559482  | 1.927841  |
| 2                | 7                | 0              | -2.738332               | 3.819290  | 1.642514  |
| 3                | 7                | 0              | 0.373631                | 5.382928  | 7.037456  |
| 4                | 7                | 0              | 0.534724                | 3.674883  | 9.353758  |
| 5                | 6                | 0              | -4.294115               | -0.473874 | 3.975447  |
| 6                | 1                | 0              | -4.834792               | 0.434587  | 4.228753  |
| 7                | 6                | 0              | -3.686264               | -0.562807 | 2.715862  |
| 8                | 6                | 0              | -3.811637               | 0.519926  | 1.718926  |
| 9                | 1                | 0              | -3.305524               | 0.339106  | 0.758207  |
| 10               | 6                | 0              | -4.613793               | 2.513477  | 0.838390  |
| 11               | 1                | 0              | -3.963941               | 2.234237  | -0.005001 |
| 12               | 6                | 0              | -4.154764               | 3.895193  | 1.328721  |
| 13               | 1                | 0              | -4.753111               | 4.147919  | 2.222407  |
| 14               | 6                | 0              | -4.374880               | 4.955403  | 0.243905  |
| 15               | 1                | 0              | -4.077894               | 5.933394  | 0.640141  |
| 16               | 1                | 0              | -3.703173               | 4.733282  | -0.596902 |
| 17               | 6                | 0              | -5.822589               | 4.981625  | -0.246779 |

|    |   |   |           |           |           |
|----|---|---|-----------|-----------|-----------|
| 18 | 1 | 0 | -5.932972 | 5.735710  | -1.033047 |
| 19 | 1 | 0 | -6.485973 | 5.279083  | 0.577229  |
| 20 | 6 | 0 | -6.239705 | 3.602496  | -0.757234 |
| 21 | 1 | 0 | -7.280044 | 3.615074  | -1.099247 |
| 22 | 1 | 0 | -5.619193 | 3.333118  | -1.624016 |
| 23 | 6 | 0 | -6.059964 | 2.550727  | 0.337259  |
| 24 | 1 | 0 | -6.722464 | 2.765397  | 1.186520  |
| 25 | 1 | 0 | -6.314599 | 1.553037  | -0.034615 |
| 26 | 6 | 0 | -2.382089 | 3.996754  | 2.847187  |
| 27 | 1 | 0 | -3.107548 | 4.226872  | 3.642180  |
| 28 | 6 | 0 | -0.964955 | 3.936281  | 3.259152  |
| 29 | 6 | 0 | 0.008046  | 3.443833  | 2.379483  |
| 30 | 1 | 0 | -0.312369 | 3.043931  | 1.422063  |
| 31 | 6 | 0 | 1.355727  | 3.473802  | 2.715862  |
| 32 | 6 | 0 | 1.736671  | 3.955750  | 3.975447  |
| 33 | 1 | 0 | 2.793759  | 3.969759  | 4.228753  |
| 34 | 6 | 0 | 0.777368  | 4.406060  | 4.875739  |
| 35 | 6 | 0 | -0.576637 | 4.403895  | 4.508552  |
| 36 | 1 | 0 | -1.307164 | 4.782686  | 5.218697  |
| 37 | 6 | 0 | 1.195688  | 4.896690  | 6.203884  |
| 38 | 1 | 0 | 2.271513  | 4.816902  | 6.424712  |
| 39 | 6 | 0 | 0.893263  | 5.846789  | 8.308661  |
| 40 | 1 | 0 | 1.977493  | 5.652781  | 8.398466  |
| 41 | 6 | 0 | 0.192513  | 5.081400  | 9.442206  |
| 42 | 1 | 0 | -0.894657 | 5.240237  | 9.323851  |
| 43 | 6 | 0 | 0.637662  | 5.617916  | 10.807188 |
| 44 | 1 | 0 | 0.113465  | 5.062870  | 11.592781 |
| 45 | 1 | 0 | 1.708076  | 5.405698  | 10.926782 |
| 46 | 6 | 0 | 0.381665  | 7.120235  | 10.931472 |
| 47 | 1 | 0 | -0.699223 | 7.311114  | 10.885929 |
| 48 | 1 | 0 | 0.726400  | 7.479189  | 11.906946 |
| 49 | 6 | 0 | 1.074858  | 7.883924  | 9.801799  |
| 50 | 1 | 0 | 2.162695  | 7.769892  | 9.903714  |
| 51 | 1 | 0 | 0.860086  | 8.955366  | 9.873074  |
| 52 | 6 | 0 | 0.634002  | 7.352060  | 8.437789  |
| 53 | 1 | 0 | -0.439806 | 7.528362  | 8.292575  |
| 54 | 1 | 0 | 1.154404  | 7.871045  | 7.625439  |
| 55 | 6 | 0 | -0.416067 | 2.844745  | 9.233313  |
| 56 | 1 | 0 | -1.467252 | 3.168527  | 9.178475  |
| 57 | 7 | 0 | -1.938436 | -4.281110 | 1.642514  |
| 58 | 7 | 0 | 0.903438  | -4.683765 | 1.927841  |
| 59 | 7 | 0 | 4.676768  | 0.461820  | 1.642514  |
| 60 | 7 | 0 | 3.604541  | 3.124283  | 1.927841  |
| 61 | 6 | 0 | -2.986470 | -1.714948 | 2.379483  |
| 62 | 1 | 0 | -2.479937 | -1.792485 | 1.422063  |
| 63 | 6 | 0 | -2.926442 | -2.803816 | 3.259152  |
| 64 | 6 | 0 | -2.270246 | -4.061327 | 2.847187  |
| 65 | 1 | 0 | -2.106805 | -4.804652 | 3.642180  |
| 66 | 6 | 0 | -1.295954 | -5.545728 | 1.328721  |
| 67 | 1 | 0 | -1.215648 | -6.190274 | 2.222407  |
| 68 | 6 | 0 | 0.130162  | -5.252400 | 0.838390  |
| 69 | 1 | 0 | 0.047064  | -4.549992 | -0.005001 |
| 70 | 6 | 0 | 0.820988  | -6.523446 | 0.337259  |
| 71 | 1 | 0 | 1.812330  | -6.245122 | -0.034615 |
| 72 | 1 | 0 | 0.966328  | -7.204523 | 1.186520  |
| 73 | 6 | 0 | -0.000001 | -7.204991 | -0.757234 |
| 74 | 1 | 0 | 0.509276  | -8.112240 | -1.099247 |
| 75 | 1 | 0 | -0.076968 | -6.532923 | -1.624016 |
| 76 | 6 | 0 | -1.402919 | -7.533322 | -0.246779 |

|     |   |   |           |           |           |
|-----|---|---|-----------|-----------|-----------|
| 77  | 1 | 0 | -2.000785 | -8.005959 | -1.033047 |
| 78  | 1 | 0 | -1.328833 | -8.256559 | 0.577229  |
| 79  | 6 | 0 | -2.104065 | -6.266459 | 0.243905  |
| 80  | 1 | 0 | -2.247556 | -5.573683 | -0.596902 |
| 81  | 1 | 0 | -3.099523 | -6.498257 | 0.640141  |
| 82  | 6 | 0 | 1.455549  | -3.560937 | 1.718926  |
| 83  | 1 | 0 | 1.359088  | -3.032221 | 0.758207  |
| 84  | 6 | 0 | 2.330537  | -2.910995 | 2.715862  |
| 85  | 6 | 0 | 2.557444  | -3.481876 | 3.975447  |
| 86  | 1 | 0 | 2.041033  | -4.404346 | 4.228753  |
| 87  | 6 | 0 | 3.427076  | -2.876250 | 4.875739  |
| 88  | 6 | 0 | 4.102203  | -1.702565 | 4.508552  |
| 89  | 1 | 0 | 4.795510  | -1.259306 | 5.218697  |
| 90  | 6 | 0 | 3.891397  | -1.132465 | 3.259152  |
| 91  | 6 | 0 | 2.978424  | -1.728885 | 2.379483  |
| 92  | 1 | 0 | 2.792306  | -1.251446 | 1.422063  |
| 93  | 6 | 0 | 4.652335  | 0.064573  | 2.847187  |
| 94  | 1 | 0 | 5.214353  | 0.577780  | 3.642180  |
| 95  | 6 | 0 | 5.450718  | 1.650535  | 1.328721  |
| 96  | 1 | 0 | 5.968759  | 2.042355  | 2.222407  |
| 97  | 6 | 0 | 4.483631  | 2.738923  | 0.838390  |
| 98  | 1 | 0 | 3.916877  | 2.315755  | -0.005001 |
| 99  | 6 | 0 | 5.238976  | 3.972719  | 0.337259  |
| 100 | 1 | 0 | 4.502269  | 4.692085  | -0.034615 |
| 101 | 1 | 0 | 5.756136  | 4.439126  | 1.186520  |
| 102 | 6 | 0 | 6.239706  | 3.602495  | -0.757234 |
| 103 | 1 | 0 | 5.696161  | 3.199805  | -1.624016 |
| 104 | 1 | 0 | 6.770768  | 4.497166  | -1.099247 |
| 105 | 6 | 0 | 7.225508  | 2.551697  | -0.246779 |
| 106 | 1 | 0 | 7.814806  | 2.977476  | 0.577229  |
| 107 | 1 | 0 | 7.933757  | 2.270249  | -1.033047 |
| 108 | 6 | 0 | 6.478945  | 1.311056  | 0.243905  |
| 109 | 1 | 0 | 5.950729  | 0.840401  | -0.596902 |
| 110 | 1 | 0 | 7.177417  | 0.564863  | 0.640141  |
| 111 | 6 | 0 | 2.356088  | 3.041011  | 1.718926  |
| 112 | 1 | 0 | 1.946436  | 2.693115  | 0.758207  |
| 113 | 7 | 0 | -4.848568 | -2.367890 | 7.037456  |
| 114 | 7 | 0 | -3.449904 | -1.374357 | 9.353758  |
| 115 | 7 | 0 | 2.915180  | -2.300526 | 9.353758  |
| 116 | 7 | 0 | 4.474937  | -3.015038 | 7.037456  |
| 117 | 6 | 0 | -3.525566 | -2.701330 | 4.508552  |
| 118 | 1 | 0 | -3.488346 | -3.523380 | 5.218697  |
| 119 | 6 | 0 | -4.204444 | -1.529810 | 4.875739  |
| 120 | 6 | 0 | -4.838502 | -1.412849 | 6.203884  |
| 121 | 1 | 0 | -5.307316 | -0.441263 | 6.424712  |
| 122 | 6 | 0 | -5.510099 | -2.149806 | 8.308661  |
| 123 | 1 | 0 | -5.884198 | -1.113831 | 8.398466  |
| 124 | 6 | 0 | -4.496878 | -2.373979 | 9.442206  |
| 125 | 1 | 0 | -4.090850 | -3.394914 | 9.323851  |
| 126 | 6 | 0 | -5.184089 | -2.256727 | 10.807188 |
| 127 | 1 | 0 | -4.441307 | -2.433171 | 11.592781 |
| 128 | 1 | 0 | -5.535510 | -1.223612 | 10.926782 |
| 129 | 6 | 0 | -6.357137 | -3.229586 | 10.931472 |
| 130 | 1 | 0 | -6.840368 | -3.110514 | 11.906946 |
| 131 | 1 | 0 | -5.981999 | -4.261102 | 10.885929 |
| 132 | 6 | 0 | -7.365107 | -3.011108 | 9.801799  |
| 133 | 1 | 0 | -8.185617 | -3.732827 | 9.873074  |
| 134 | 1 | 0 | -7.810271 | -2.011997 | 9.903714  |
| 135 | 6 | 0 | -6.684072 | -3.126968 | 8.437789  |

|     |   |   |           |           |           |
|-----|---|---|-----------|-----------|-----------|
| 136 | 1 | 0 | -6.299850 | -4.145064 | 8.292575  |
| 137 | 1 | 0 | -7.393727 | -2.935779 | 7.625439  |
| 138 | 6 | 0 | -2.255588 | -1.782697 | 9.233313  |
| 139 | 1 | 0 | -2.010399 | -2.854941 | 9.178475  |
| 140 | 6 | 0 | -1.101603 | -0.862734 | 9.187397  |
| 141 | 6 | 0 | -1.288549 | 0.527094  | 9.185421  |
| 142 | 1 | 0 | -2.304491 | 0.913491  | 9.196016  |
| 143 | 6 | 0 | -0.196348 | 1.385383  | 9.187397  |
| 144 | 6 | 0 | 1.100751  | 0.852369  | 9.185421  |
| 145 | 1 | 0 | 1.943352  | 1.539002  | 9.196016  |
| 146 | 6 | 0 | 1.297951  | -0.522649 | 9.187397  |
| 147 | 6 | 0 | 0.187798  | -1.379463 | 9.185421  |
| 148 | 1 | 0 | 0.361139  | -2.452493 | 9.196016  |
| 149 | 6 | 0 | 2.671655  | -1.062048 | 9.233313  |
| 150 | 1 | 0 | 3.477651  | -0.313586 | 9.178475  |
| 151 | 6 | 0 | 4.304365  | -2.707421 | 9.442206  |
| 152 | 1 | 0 | 4.985507  | -1.845323 | 9.323851  |
| 153 | 6 | 0 | 4.616836  | -3.696983 | 8.308661  |
| 154 | 1 | 0 | 3.906705  | -4.538950 | 8.398466  |
| 155 | 6 | 0 | 6.050070  | -4.225092 | 8.437789  |
| 156 | 1 | 0 | 6.239323  | -4.935266 | 7.625439  |
| 157 | 1 | 0 | 6.739656  | -3.383298 | 8.292575  |
| 158 | 6 | 0 | 6.290249  | -4.872816 | 9.801799  |
| 159 | 1 | 0 | 5.647576  | -5.757895 | 9.903714  |
| 160 | 1 | 0 | 7.325531  | -5.222539 | 9.873074  |
| 161 | 6 | 0 | 5.975472  | -3.890649 | 10.931472 |
| 162 | 1 | 0 | 6.681222  | -3.050012 | 10.885929 |
| 163 | 1 | 0 | 6.113968  | -4.368675 | 11.906946 |
| 164 | 6 | 0 | 4.546427  | -3.361189 | 10.807188 |
| 165 | 1 | 0 | 3.827434  | -4.182086 | 10.926782 |
| 166 | 1 | 0 | 4.327842  | -2.629699 | 11.592781 |
| 167 | 6 | 0 | 3.642814  | -3.483841 | 6.203884  |
| 168 | 1 | 0 | 3.035803  | -4.375639 | 6.424712  |
| 169 | 7 | 0 | -0.903438 | 4.683765  | -1.927841 |
| 170 | 7 | 0 | 1.938436  | 4.281110  | -1.642514 |
| 171 | 7 | 0 | 4.848568  | 2.367890  | -7.037456 |
| 172 | 7 | 0 | 3.449904  | 1.374357  | -9.353758 |
| 173 | 6 | 0 | -2.557444 | 3.481876  | -3.975447 |
| 174 | 1 | 0 | -2.041033 | 4.404346  | -4.228753 |
| 175 | 6 | 0 | -2.330537 | 2.910995  | -2.715862 |
| 176 | 6 | 0 | -1.455549 | 3.560937  | -1.718926 |
| 177 | 1 | 0 | -1.359088 | 3.032221  | -0.758207 |
| 178 | 6 | 0 | -0.130162 | 5.252400  | -0.838390 |
| 179 | 1 | 0 | -0.047064 | 4.549992  | 0.005001  |
| 180 | 6 | 0 | 1.295954  | 5.545728  | -1.328721 |
| 181 | 1 | 0 | 1.215648  | 6.190274  | -2.222407 |
| 182 | 6 | 0 | 2.104065  | 6.266459  | -0.243905 |
| 183 | 1 | 0 | 3.099523  | 6.498257  | -0.640141 |
| 184 | 1 | 0 | 2.247556  | 5.573683  | 0.596902  |
| 185 | 6 | 0 | 1.402919  | 7.533322  | 0.246779  |
| 186 | 1 | 0 | 2.000785  | 8.005959  | 1.033047  |
| 187 | 1 | 0 | 1.328833  | 8.256559  | -0.577229 |
| 188 | 6 | 0 | 0.000001  | 7.204991  | 0.757234  |
| 189 | 1 | 0 | -0.509276 | 8.112240  | 1.099247  |
| 190 | 1 | 0 | 0.076968  | 6.532923  | 1.624016  |
| 191 | 6 | 0 | -0.820988 | 6.523446  | -0.337259 |
| 192 | 1 | 0 | -0.966328 | 7.204523  | -1.186520 |
| 193 | 1 | 0 | -1.812330 | 6.245122  | 0.034615  |
| 194 | 6 | 0 | 2.270246  | 4.061327  | -2.847187 |

|     |   |   |           |           |            |
|-----|---|---|-----------|-----------|------------|
| 195 | 1 | 0 | 2.106805  | 4.804652  | -3.642180  |
| 196 | 6 | 0 | 2.926442  | 2.803816  | -3.259152  |
| 197 | 6 | 0 | 2.986470  | 1.714948  | -2.379483  |
| 198 | 1 | 0 | 2.479937  | 1.792485  | -1.422063  |
| 199 | 6 | 0 | 3.686264  | 0.562807  | -2.715862  |
| 200 | 6 | 0 | 4.294115  | 0.473874  | -3.975447  |
| 201 | 1 | 0 | 4.834792  | -0.434587 | -4.228753  |
| 202 | 6 | 0 | 4.204444  | 1.529810  | -4.875739  |
| 203 | 6 | 0 | 3.525566  | 2.701330  | -4.508552  |
| 204 | 1 | 0 | 3.488346  | 3.523380  | -5.218697  |
| 205 | 6 | 0 | 4.838502  | 1.412849  | -6.203884  |
| 206 | 1 | 0 | 5.307316  | 0.441263  | -6.424712  |
| 207 | 6 | 0 | 5.510099  | 2.149806  | -8.308661  |
| 208 | 1 | 0 | 5.884198  | 1.113831  | -8.398466  |
| 209 | 6 | 0 | 4.496878  | 2.373979  | -9.442206  |
| 210 | 1 | 0 | 4.090850  | 3.394914  | -9.323851  |
| 211 | 6 | 0 | 5.184089  | 2.256727  | -10.807188 |
| 212 | 1 | 0 | 4.441307  | 2.433171  | -11.592781 |
| 213 | 1 | 0 | 5.535510  | 1.223612  | -10.926782 |
| 214 | 6 | 0 | 6.357137  | 3.229586  | -10.931472 |
| 215 | 1 | 0 | 5.981999  | 4.261102  | -10.885929 |
| 216 | 1 | 0 | 6.840368  | 3.110514  | -11.906946 |
| 217 | 6 | 0 | 7.365107  | 3.011108  | -9.801799  |
| 218 | 1 | 0 | 7.810271  | 2.011997  | -9.903714  |
| 219 | 1 | 0 | 8.185617  | 3.732827  | -9.873074  |
| 220 | 6 | 0 | 6.684072  | 3.126968  | -8.437789  |
| 221 | 1 | 0 | 6.299850  | 4.145064  | -8.292575  |
| 222 | 1 | 0 | 7.393727  | 2.935779  | -7.625439  |
| 223 | 6 | 0 | 2.255588  | 1.782697  | -9.233313  |
| 224 | 1 | 0 | 2.010399  | 2.854941  | -9.178475  |
| 225 | 7 | 0 | -4.676768 | -0.461820 | -1.642514  |
| 226 | 7 | 0 | -3.604541 | -3.124283 | -1.927841  |
| 227 | 7 | 0 | 2.738332  | -3.819290 | -1.642514  |
| 228 | 7 | 0 | 4.507979  | -1.559482 | -1.927841  |
| 229 | 6 | 0 | -2.978424 | 1.728885  | -2.379483  |
| 230 | 1 | 0 | -2.792306 | 1.251446  | -1.422063  |
| 231 | 6 | 0 | -3.891397 | 1.132465  | -3.259152  |
| 232 | 6 | 0 | -4.652335 | -0.064573 | -2.847187  |
| 233 | 1 | 0 | -5.214353 | -0.577780 | -3.642180  |
| 234 | 6 | 0 | -5.450718 | -1.650535 | -1.328721  |
| 235 | 1 | 0 | -5.968759 | -2.042355 | -2.222407  |
| 236 | 6 | 0 | -4.483631 | -2.738923 | -0.838390  |
| 237 | 1 | 0 | -3.916877 | -2.315755 | 0.005001   |
| 238 | 6 | 0 | -5.238976 | -3.972719 | -0.337259  |
| 239 | 1 | 0 | -4.502269 | -4.692085 | 0.034615   |
| 240 | 1 | 0 | -5.756136 | -4.439126 | -1.186520  |
| 241 | 6 | 0 | -6.239706 | -3.602495 | 0.757234   |
| 242 | 1 | 0 | -6.770768 | -4.497166 | 1.099247   |
| 243 | 1 | 0 | -5.696161 | -3.199805 | 1.624016   |
| 244 | 6 | 0 | -7.225508 | -2.551697 | 0.246779   |
| 245 | 1 | 0 | -7.933757 | -2.270249 | 1.033047   |
| 246 | 1 | 0 | -7.814806 | -2.977476 | -0.577229  |
| 247 | 6 | 0 | -6.478945 | -1.311056 | -0.243905  |
| 248 | 1 | 0 | -5.950729 | -0.840401 | 0.596902   |
| 249 | 1 | 0 | -7.177417 | -0.564863 | -0.640141  |
| 250 | 6 | 0 | -2.356088 | -3.041011 | -1.718926  |
| 251 | 1 | 0 | -1.946436 | -2.693115 | -0.758207  |
| 252 | 6 | 0 | -1.355727 | -3.473802 | -2.715862  |
| 253 | 6 | 0 | -1.736671 | -3.955750 | -3.975447  |

|     |   |   |           |           |            |
|-----|---|---|-----------|-----------|------------|
| 254 | 1 | 0 | -2.793759 | -3.969759 | -4.228753  |
| 255 | 6 | 0 | -0.777368 | -4.406060 | -4.875739  |
| 256 | 6 | 0 | 0.576637  | -4.403895 | -4.508552  |
| 257 | 1 | 0 | 1.307164  | -4.782686 | -5.218697  |
| 258 | 6 | 0 | 0.964955  | -3.936281 | -3.259152  |
| 259 | 6 | 0 | -0.008046 | -3.443833 | -2.379483  |
| 260 | 1 | 0 | 0.312369  | -3.043931 | -1.422063  |
| 261 | 6 | 0 | 2.382089  | -3.996754 | -2.847187  |
| 262 | 1 | 0 | 3.107548  | -4.226872 | -3.642180  |
| 263 | 6 | 0 | 4.154764  | -3.895193 | -1.328721  |
| 264 | 1 | 0 | 4.753111  | -4.147919 | -2.222407  |
| 265 | 6 | 0 | 4.613793  | -2.513477 | -0.838390  |
| 266 | 1 | 0 | 3.963941  | -2.234237 | 0.005001   |
| 267 | 6 | 0 | 6.059964  | -2.550727 | -0.337259  |
| 268 | 1 | 0 | 6.314599  | -1.553037 | 0.034615   |
| 269 | 1 | 0 | 6.722464  | -2.765397 | -1.186520  |
| 270 | 6 | 0 | 6.239705  | -3.602496 | 0.757234   |
| 271 | 1 | 0 | 5.619193  | -3.333118 | 1.624016   |
| 272 | 1 | 0 | 7.280044  | -3.615074 | 1.099247   |
| 273 | 6 | 0 | 5.822589  | -4.981625 | 0.246779   |
| 274 | 1 | 0 | 6.485973  | -5.279083 | -0.577229  |
| 275 | 1 | 0 | 5.932972  | -5.735710 | 1.033047   |
| 276 | 6 | 0 | 4.374880  | -4.955403 | -0.243905  |
| 277 | 1 | 0 | 3.703173  | -4.733282 | 0.596902   |
| 278 | 1 | 0 | 4.077894  | -5.933394 | -0.640141  |
| 279 | 6 | 0 | 3.811637  | -0.519926 | -1.718926  |
| 280 | 1 | 0 | 3.305524  | -0.339106 | -0.758207  |
| 281 | 7 | 0 | -4.474937 | 3.015038  | -7.037456  |
| 282 | 7 | 0 | -2.915180 | 2.300526  | -9.353758  |
| 283 | 7 | 0 | -0.534724 | -3.674883 | -9.353758  |
| 284 | 7 | 0 | -0.373631 | -5.382928 | -7.037456  |
| 285 | 6 | 0 | -4.102203 | 1.702565  | -4.508552  |
| 286 | 1 | 0 | -4.795510 | 1.259306  | -5.218697  |
| 287 | 6 | 0 | -3.427076 | 2.876250  | -4.875739  |
| 288 | 6 | 0 | -3.642814 | 3.483841  | -6.203884  |
| 289 | 1 | 0 | -3.035803 | 4.375639  | -6.424712  |
| 290 | 6 | 0 | -4.616836 | 3.696983  | -8.308661  |
| 291 | 1 | 0 | -3.906705 | 4.538950  | -8.398466  |
| 292 | 6 | 0 | -4.304365 | 2.707421  | -9.442206  |
| 293 | 1 | 0 | -4.985507 | 1.845323  | -9.323851  |
| 294 | 6 | 0 | -4.546427 | 3.361189  | -10.807188 |
| 295 | 1 | 0 | -4.327842 | 2.629699  | -11.592781 |
| 296 | 1 | 0 | -3.827434 | 4.182086  | -10.926782 |
| 297 | 6 | 0 | -5.975472 | 3.890649  | -10.931472 |
| 298 | 1 | 0 | -6.113968 | 4.368675  | -11.906946 |
| 299 | 1 | 0 | -6.681222 | 3.050012  | -10.885929 |
| 300 | 6 | 0 | -6.290249 | 4.872816  | -9.801799  |
| 301 | 1 | 0 | -7.325531 | 5.222539  | -9.873074  |
| 302 | 1 | 0 | -5.647576 | 5.757895  | -9.903714  |
| 303 | 6 | 0 | -6.050070 | 4.225092  | -8.437789  |
| 304 | 1 | 0 | -6.739656 | 3.383298  | -8.292575  |
| 305 | 1 | 0 | -6.239323 | 4.935266  | -7.625439  |
| 306 | 6 | 0 | -2.671655 | 1.062048  | -9.233313  |
| 307 | 1 | 0 | -3.477651 | 0.313586  | -9.178475  |
| 308 | 6 | 0 | -1.297951 | 0.522649  | -9.187397  |
| 309 | 6 | 0 | -0.187798 | 1.379463  | -9.185421  |
| 310 | 1 | 0 | -0.361139 | 2.452493  | -9.196016  |
| 311 | 6 | 0 | 1.101603  | 0.862734  | -9.187397  |
| 312 | 6 | 0 | 1.288549  | -0.527094 | -9.185421  |

|     |   |   |           |           |            |
|-----|---|---|-----------|-----------|------------|
| 313 | 1 | 0 | 2.304491  | -0.913491 | -9.196016  |
| 314 | 6 | 0 | 0.196348  | -1.385383 | -9.187397  |
| 315 | 6 | 0 | -1.100751 | -0.852369 | -9.185421  |
| 316 | 1 | 0 | -1.943352 | -1.539002 | -9.196016  |
| 317 | 6 | 0 | 0.416067  | -2.844745 | -9.233313  |
| 318 | 1 | 0 | 1.467252  | -3.168527 | -9.178475  |
| 319 | 6 | 0 | -0.192513 | -5.081400 | -9.442206  |
| 320 | 1 | 0 | 0.894657  | -5.240237 | -9.323851  |
| 321 | 6 | 0 | -0.893263 | -5.846789 | -8.308661  |
| 322 | 1 | 0 | -1.977493 | -5.652781 | -8.398466  |
| 323 | 6 | 0 | -0.634002 | -7.352060 | -8.437789  |
| 324 | 1 | 0 | -1.154404 | -7.871045 | -7.625439  |
| 325 | 1 | 0 | 0.439806  | -7.528362 | -8.292575  |
| 326 | 6 | 0 | -1.074858 | -7.883924 | -9.801799  |
| 327 | 1 | 0 | -2.162695 | -7.769892 | -9.903714  |
| 328 | 1 | 0 | -0.860086 | -8.955366 | -9.873074  |
| 329 | 6 | 0 | -0.381665 | -7.120235 | -10.931472 |
| 330 | 1 | 0 | 0.699223  | -7.311114 | -10.885929 |
| 331 | 1 | 0 | -0.726400 | -7.479189 | -11.906946 |
| 332 | 6 | 0 | -0.637662 | -5.617916 | -10.807188 |
| 333 | 1 | 0 | -1.708076 | -5.405698 | -10.926782 |
| 334 | 1 | 0 | -0.113465 | -5.062870 | -11.592781 |
| 335 | 6 | 0 | -1.195688 | -4.896690 | -6.203884  |
| 336 | 1 | 0 | -2.271513 | -4.816902 | -6.424712  |

-----  
Xe@w-to-w-a C3 cc3-rdim33

Standard orientation:

| Center<br>Number | Atomic<br>Number | Atomic<br>Type | Coordinates (Angstroms) |           |           |
|------------------|------------------|----------------|-------------------------|-----------|-----------|
|                  |                  |                | X                       | Y         | Z         |
| 1                | 7                | 0              | 0.752355                | 4.472377  | 1.494361  |
| 2                | 7                | 0              | 3.431098                | 3.384888  | 1.542817  |
| 3                | 7                | 0              | 3.497015                | -2.887747 | 1.494361  |
| 4                | 7                | 0              | 1.215851                | -4.663862 | 1.542817  |
| 5                | 6                | 0              | -1.512607               | 2.922597  | 2.219051  |
| 6                | 1                | 0              | -1.041375               | 2.737107  | 1.255534  |
| 7                | 6                | 0              | -0.894196               | 3.820092  | 3.100803  |
| 8                | 6                | 0              | 0.330548                | 4.537321  | 2.687503  |
| 9                | 1                | 0              | 0.824383                | 5.151459  | 3.456670  |
| 10               | 6                | 0              | 1.914556                | 5.243264  | 1.103089  |
| 11               | 1                | 0              | 2.380244                | 5.756579  | 1.963496  |
| 12               | 6                | 0              | 2.943634                | 4.272403  | 0.498092  |
| 13               | 1                | 0              | 2.402988                | 3.709963  | -0.278903 |
| 14               | 6                | 0              | 4.114830                | 5.010189  | -0.151741 |
| 15               | 1                | 0              | 4.772838                | 4.272681  | -0.623846 |
| 16               | 1                | 0              | 4.693155                | 5.511144  | 0.636084  |
| 17               | 6                | 0              | 3.634558                | 6.026440  | -1.188193 |
| 18               | 1                | 0              | 4.493101                | 6.551804  | -1.619588 |
| 19               | 1                | 0              | 3.135979                | 5.497373  | -2.012950 |
| 20               | 6                | 0              | 2.654287                | 7.015553  | -0.559177 |
| 21               | 1                | 0              | 2.294583                | 7.731689  | -1.305749 |
| 22               | 1                | 0              | 3.170071                | 7.596348  | 0.218273  |
| 23               | 6                | 0              | 1.470171                | 6.270985  | 0.054390  |
| 24               | 1                | 0              | 0.917172                | 5.729727  | -0.726555 |
| 25               | 1                | 0              | 0.762364                | 6.965370  | 0.522369  |
| 26               | 6                | 0              | 2.954500                | 2.209211  | 1.564812  |
| 27               | 1                | 0              | 2.217446                | 1.866353  | 0.823366  |



|    |   |   |           |           |           |
|----|---|---|-----------|-----------|-----------|
| 28 | 6 | 0 | 3.376101  | 1.196149  | 2.554318  |
| 29 | 6 | 0 | 3.902470  | 1.567214  | 3.797957  |
| 30 | 1 | 0 | 3.970620  | 2.624396  | 4.042311  |
| 31 | 6 | 0 | 4.327874  | 0.595835  | 4.698867  |
| 32 | 6 | 0 | 4.257572  | -0.758838 | 4.343521  |
| 33 | 1 | 0 | 4.615913  | -1.499989 | 5.053301  |
| 34 | 6 | 0 | 3.755395  | -1.135650 | 3.100803  |
| 35 | 6 | 0 | 3.287347  | -0.151342 | 2.219051  |
| 36 | 1 | 0 | 2.891092  | -0.466696 | 1.255534  |
| 37 | 6 | 0 | 3.764161  | -2.554923 | 2.687503  |
| 38 | 1 | 0 | 4.049103  | -3.289666 | 3.456670  |
| 39 | 6 | 0 | 3.583521  | -4.279686 | 1.103089  |
| 40 | 1 | 0 | 3.795222  | -4.939642 | 1.963496  |
| 41 | 6 | 0 | 2.228192  | -4.685463 | 0.498092  |
| 42 | 1 | 0 | 2.011428  | -3.936030 | -0.278903 |
| 43 | 6 | 0 | 2.281536  | -6.068642 | -0.151741 |
| 44 | 1 | 0 | 1.313832  | -6.269739 | -0.623846 |
| 45 | 1 | 0 | 2.426213  | -6.819964 | 0.636084  |
| 46 | 6 | 0 | 3.401771  | -6.160840 | -1.188193 |
| 47 | 1 | 0 | 3.192875  | -5.464524 | -2.012950 |
| 48 | 1 | 0 | 3.427479  | -7.167042 | -1.619588 |
| 49 | 6 | 0 | 4.748503  | -5.806457 | -0.559177 |
| 50 | 1 | 0 | 4.993595  | -6.543536 | 0.218273  |
| 51 | 1 | 0 | 5.548548  | -5.853012 | -1.305749 |
| 52 | 6 | 0 | 4.695747  | -4.408698 | 0.054390  |
| 53 | 1 | 0 | 4.503504  | -3.659158 | -0.726555 |
| 54 | 1 | 0 | 5.651005  | -4.142912 | 0.522369  |
| 55 | 6 | 0 | 0.435983  | -3.663278 | 1.564812  |
| 56 | 1 | 0 | 0.507586  | -2.853541 | 0.823366  |
| 57 | 7 | 0 | -2.825402 | 4.561751  | 6.824400  |
| 58 | 7 | 0 | -2.181229 | 3.001281  | 9.144487  |
| 59 | 7 | 0 | 3.689800  | 0.388359  | 9.144487  |
| 60 | 7 | 0 | 5.363293  | 0.165994  | 6.824400  |
| 61 | 6 | 0 | -1.471613 | 4.066584  | 4.343521  |
| 62 | 1 | 0 | -1.008928 | 4.747493  | 5.053301  |
| 63 | 6 | 0 | -2.679945 | 3.450132  | 4.698867  |
| 64 | 6 | 0 | -3.300422 | 3.714730  | 6.009779  |
| 65 | 1 | 0 | -4.206531 | 3.131640  | 6.236308  |
| 66 | 6 | 0 | -3.511185 | 4.743541  | 8.087882  |
| 67 | 1 | 0 | -4.378539 | 4.064957  | 8.179375  |
| 68 | 6 | 0 | -2.538619 | 4.403884  | 9.229203  |
| 69 | 1 | 0 | -1.653152 | 5.054353  | 9.110716  |
| 70 | 6 | 0 | -3.191319 | 4.677052  | 10.588404 |
| 71 | 1 | 0 | -2.473380 | 4.437780  | 11.380386 |
| 72 | 1 | 0 | -4.038047 | 3.988512  | 10.706913 |
| 73 | 6 | 0 | -3.670113 | 6.125034  | 10.699410 |
| 74 | 1 | 0 | -4.149112 | 6.287540  | 11.670672 |
| 75 | 1 | 0 | -2.804347 | 6.799776  | 10.654987 |
| 76 | 6 | 0 | -4.633091 | 6.467949  | 9.561298  |
| 77 | 1 | 0 | -4.945384 | 7.515663  | 9.624030  |
| 78 | 1 | 0 | -5.541685 | 5.858681  | 9.661507  |
| 79 | 6 | 0 | -3.986535 | 6.195536  | 8.202678  |
| 80 | 1 | 0 | -3.119156 | 6.852728  | 8.058187  |
| 81 | 1 | 0 | -4.684620 | 6.405345  | 7.384984  |
| 82 | 6 | 0 | -0.956647 | 2.713100  | 8.986209  |
| 83 | 1 | 0 | -0.180858 | 3.490609  | 8.907396  |
| 84 | 6 | 0 | -0.472033 | 1.319390  | 8.928424  |
| 85 | 6 | 0 | -1.372036 | 0.244689  | 8.925092  |
| 86 | 1 | 0 | -2.437582 | 0.459518  | 8.939150  |

|     |   |   |           |           |           |
|-----|---|---|-----------|-----------|-----------|
| 87  | 6 | 0 | -0.906609 | -1.068487 | 8.928424  |
| 88  | 6 | 0 | 0.474111  | -1.310563 | 8.925092  |
| 89  | 1 | 0 | 0.820837  | -2.340767 | 8.939150  |
| 90  | 6 | 0 | 1.378642  | -0.250903 | 8.928424  |
| 91  | 6 | 0 | 0.897925  | 1.065874  | 8.925092  |
| 92  | 1 | 0 | 1.616745  | 1.881249  | 8.939150  |
| 93  | 6 | 0 | 2.827937  | -0.528069 | 8.986209  |
| 94  | 1 | 0 | 3.113385  | -1.588677 | 8.907396  |
| 95  | 6 | 0 | 5.083184  | -0.003434 | 9.229203  |
| 96  | 1 | 0 | 5.203774  | -1.095505 | 9.110716  |
| 97  | 6 | 0 | 5.863620  | 0.669005  | 8.087882  |
| 98  | 1 | 0 | 5.709626  | 1.759447  | 8.179375  |
| 99  | 6 | 0 | 7.358760  | 0.354673  | 8.202678  |
| 100 | 1 | 0 | 7.889501  | 0.854328  | 7.384984  |
| 101 | 1 | 0 | 7.494214  | -0.725096 | 8.058187  |
| 102 | 6 | 0 | 7.917954  | 0.778400  | 9.561298  |
| 103 | 1 | 0 | 7.844610  | 1.869900  | 9.661507  |
| 104 | 1 | 0 | 8.981448  | 0.524997  | 9.624030  |
| 105 | 6 | 0 | 7.139491  | 0.115895  | 10.699410 |
| 106 | 1 | 0 | 7.290953  | -0.971252 | 10.654987 |
| 107 | 1 | 0 | 7.519725  | 0.449467  | 11.670672 |
| 108 | 6 | 0 | 5.646106  | 0.425237  | 10.588404 |
| 109 | 1 | 0 | 5.473176  | 1.502795  | 10.706913 |
| 110 | 1 | 0 | 5.079920  | -0.076880 | 11.380386 |
| 111 | 6 | 0 | 4.867262  | 1.000884  | 6.009779  |
| 112 | 1 | 0 | 4.815345  | 2.077143  | 6.236308  |
| 113 | 7 | 0 | -4.646948 | 1.278973  | 1.542817  |
| 114 | 7 | 0 | -4.249370 | -1.584630 | 1.494361  |
| 115 | 7 | 0 | -2.537891 | -4.727745 | 6.824400  |
| 116 | 7 | 0 | -1.508571 | -3.389640 | 9.144487  |
| 117 | 6 | 0 | -3.308482 | 2.596031  | 3.797957  |
| 118 | 1 | 0 | -4.258104 | 2.126460  | 4.042311  |
| 119 | 6 | 0 | -2.723946 | 2.325715  | 2.554318  |
| 120 | 6 | 0 | -3.390483 | 1.454067  | 1.564812  |
| 121 | 1 | 0 | -2.725032 | 0.987188  | 0.823366  |
| 122 | 6 | 0 | -5.171826 | 0.413061  | 0.498092  |
| 123 | 1 | 0 | -4.414416 | 0.226067  | -0.278903 |
| 124 | 6 | 0 | -5.498078 | -0.963577 | 1.103089  |
| 125 | 1 | 0 | -6.175466 | -0.816938 | 1.963496  |
| 126 | 6 | 0 | -6.165918 | -1.862287 | 0.054390  |
| 127 | 1 | 0 | -6.413369 | -2.822458 | 0.522369  |
| 128 | 1 | 0 | -5.420675 | -2.070570 | -0.726555 |
| 129 | 6 | 0 | -7.402791 | -1.209096 | -0.559177 |
| 130 | 1 | 0 | -7.843131 | -1.878677 | -1.305749 |
| 131 | 1 | 0 | -8.163666 | -1.052812 | 0.218273  |
| 132 | 6 | 0 | -7.036329 | 0.134400  | -1.188193 |
| 133 | 1 | 0 | -7.920580 | 0.615238  | -1.619588 |
| 134 | 1 | 0 | -6.328854 | -0.032849 | -2.012950 |
| 135 | 6 | 0 | -6.396366 | 1.058453  | -0.151741 |
| 136 | 1 | 0 | -7.119369 | 1.308820  | 0.636084  |
| 137 | 1 | 0 | -6.086669 | 1.997058  | -0.623846 |
| 138 | 6 | 0 | -4.094709 | -1.982398 | 2.687503  |
| 139 | 1 | 0 | -4.873486 | -1.861793 | 3.456670  |
| 140 | 6 | 0 | -2.861199 | -2.684442 | 3.100803  |
| 141 | 6 | 0 | -1.774739 | -2.771255 | 2.219051  |
| 142 | 1 | 0 | -1.849717 | -2.270411 | 1.255534  |
| 143 | 6 | 0 | -0.652155 | -3.521864 | 2.554318  |
| 144 | 6 | 0 | -0.593988 | -4.163245 | 3.797957  |
| 145 | 1 | 0 | 0.287484  | -4.750856 | 4.042311  |

|     |   |   |           |           |           |
|-----|---|---|-----------|-----------|-----------|
| 146 | 6 | 0 | -1.647929 | -4.045967 | 4.698867  |
| 147 | 6 | 0 | -2.785959 | -3.307746 | 4.343521  |
| 148 | 1 | 0 | -3.606985 | -3.247504 | 5.053301  |
| 149 | 6 | 0 | -1.566840 | -4.715615 | 6.009779  |
| 150 | 1 | 0 | -0.608814 | -5.208782 | 6.236308  |
| 151 | 6 | 0 | -2.352435 | -5.412546 | 8.087882  |
| 152 | 1 | 0 | -1.331087 | -5.824404 | 8.179375  |
| 153 | 6 | 0 | -2.544566 | -4.400450 | 9.229203  |
| 154 | 1 | 0 | -3.550622 | -3.958848 | 9.110716  |
| 155 | 6 | 0 | -2.454787 | -5.102289 | 10.588404 |
| 156 | 1 | 0 | -2.606540 | -4.360900 | 11.380386 |
| 157 | 1 | 0 | -1.435129 | -5.491307 | 10.706913 |
| 158 | 6 | 0 | -3.469378 | -6.240928 | 10.699410 |
| 159 | 1 | 0 | -4.486605 | -5.828524 | 10.654987 |
| 160 | 1 | 0 | -3.370613 | -6.737007 | 11.670672 |
| 161 | 6 | 0 | -3.284863 | -7.246349 | 9.561298  |
| 162 | 1 | 0 | -2.302924 | -7.728581 | 9.661507  |
| 163 | 1 | 0 | -4.036063 | -8.040660 | 9.624030  |
| 164 | 6 | 0 | -3.372224 | -6.550209 | 8.202678  |
| 165 | 1 | 0 | -4.375058 | -6.127632 | 8.058187  |
| 166 | 1 | 0 | -3.204881 | -7.259672 | 7.384984  |
| 167 | 6 | 0 | -1.871290 | -2.185031 | 8.986209  |
| 168 | 1 | 0 | -2.932527 | -1.901932 | 8.907396  |
| 169 | 7 | 0 | -1.194684 | 4.374769  | -1.884753 |
| 170 | 7 | 0 | -3.767083 | 3.033252  | -1.942588 |
| 171 | 7 | 0 | -3.191319 | -3.222012 | -1.884753 |
| 172 | 7 | 0 | -0.743332 | -4.779015 | -1.942588 |
| 173 | 6 | 0 | 1.243324  | 3.122783  | -2.606786 |
| 174 | 1 | 0 | 0.785549  | 2.873753  | -1.651353 |
| 175 | 6 | 0 | 0.543555  | 3.969942  | -3.476640 |
| 176 | 6 | 0 | -0.753218 | 4.545368  | -3.060296 |
| 177 | 1 | 0 | -1.286408 | 5.150568  | -3.810062 |
| 178 | 6 | 0 | -2.426889 | 5.021604  | -1.481317 |
| 179 | 1 | 0 | -2.941094 | 5.501653  | -2.333204 |
| 180 | 6 | 0 | -3.356473 | 3.949165  | -0.888923 |
| 181 | 1 | 0 | -2.762580 | 3.428348  | -0.120783 |
| 182 | 6 | 0 | -4.589805 | 4.563053  | -0.224604 |
| 183 | 1 | 0 | -5.174608 | 3.759040  | 0.234935  |
| 184 | 1 | 0 | -5.214670 | 5.021914  | -1.002463 |
| 185 | 6 | 0 | -4.202746 | 5.601046  | 0.828792  |
| 186 | 1 | 0 | -5.104646 | 6.034611  | 1.273519  |
| 187 | 1 | 0 | -3.651296 | 5.106583  | 1.641434  |
| 188 | 6 | 0 | -3.324657 | 6.689621  | 0.213455  |
| 189 | 1 | 0 | -3.030288 | 7.424057  | 0.970820  |
| 190 | 1 | 0 | -3.898293 | 7.231569  | -0.551394 |
| 191 | 6 | 0 | -2.078514 | 6.072232  | -0.418116 |
| 192 | 1 | 0 | -1.469388 | 5.576377  | 0.351236  |
| 193 | 1 | 0 | -1.445073 | 6.839095  | -0.879531 |
| 194 | 6 | 0 | -3.211730 | 1.892735  | -1.957419 |
| 195 | 1 | 0 | -2.458269 | 1.605714  | -1.209071 |
| 196 | 6 | 0 | -3.553770 | 0.844008  | -2.940307 |
| 197 | 6 | 0 | -4.135349 | 1.156259  | -4.175205 |
| 198 | 1 | 0 | -4.307553 | 2.200745  | -4.422867 |
| 199 | 6 | 0 | -4.472351 | 0.144306  | -5.068872 |
| 200 | 6 | 0 | -4.267636 | -1.195699 | -4.709912 |
| 201 | 1 | 0 | -4.556825 | -1.971115 | -5.414559 |
| 202 | 6 | 0 | -3.709849 | -1.514238 | -3.476640 |
| 203 | 6 | 0 | -3.326071 | -0.484641 | -2.606786 |
| 204 | 1 | 0 | -2.881518 | -0.756571 | -1.651353 |

|     |   |   |           |           |            |
|-----|---|---|-----------|-----------|------------|
| 205 | 6 | 0 | -3.559795 | -2.924989 | -3.060296  |
| 206 | 1 | 0 | -3.817318 | -3.689346 | -3.810062  |
| 207 | 6 | 0 | -3.135392 | -4.612549 | -1.481317  |
| 208 | 1 | 0 | -3.294025 | -5.297888 | -2.333204  |
| 209 | 6 | 0 | -1.741840 | -4.881373 | -0.888923  |
| 210 | 1 | 0 | -1.587746 | -4.106638 | -0.120783  |
| 211 | 6 | 0 | -1.656818 | -6.256414 | -0.224604  |
| 212 | 1 | 0 | -0.668120 | -6.360862 | 0.234935   |
| 213 | 1 | 0 | -1.741770 | -7.026994 | -1.002463  |
| 214 | 6 | 0 | -2.749275 | -6.440208 | 0.828792   |
| 215 | 1 | 0 | -2.596782 | -5.715406 | 1.641434   |
| 216 | 1 | 0 | -2.673804 | -7.438059 | 1.273519   |
| 217 | 6 | 0 | -4.131053 | -6.224048 | 0.213455   |
| 218 | 1 | 0 | -4.313576 | -6.991805 | -0.551394  |
| 219 | 1 | 0 | -4.914277 | -6.336335 | 0.970820   |
| 220 | 6 | 0 | -4.219450 | -4.836162 | -0.418116  |
| 221 | 1 | 0 | -4.094590 | -4.060716 | 0.351236   |
| 222 | 1 | 0 | -5.200294 | -4.671018 | -0.879531  |
| 223 | 6 | 0 | -0.033291 | -3.727807 | -1.957419  |
| 224 | 1 | 0 | -0.161455 | -2.931780 | -1.209071  |
| 225 | 7 | 0 | 2.357920  | 4.861261  | -7.227955  |
| 226 | 7 | 0 | 1.871493  | 3.209592  | -9.538046  |
| 227 | 7 | 0 | -3.715335 | 0.015965  | -9.538046  |
| 228 | 7 | 0 | -5.388935 | -0.388612 | -7.227955  |
| 229 | 6 | 0 | 1.098312  | 4.293730  | -4.709912  |
| 230 | 1 | 0 | 0.571377  | 4.931884  | -5.414559  |
| 231 | 6 | 0 | 2.361148  | 3.801017  | -5.068872  |
| 232 | 6 | 0 | 2.943078  | 4.112486  | -6.388854  |
| 233 | 1 | 0 | 3.917492  | 3.646812  | -6.603735  |
| 234 | 6 | 0 | 3.014853  | 5.095671  | -8.498467  |
| 235 | 1 | 0 | 3.949137  | 4.511853  | -8.584859  |
| 236 | 6 | 0 | 2.080428  | 4.642037  | -9.631404  |
| 237 | 1 | 0 | 1.131383  | 5.196434  | -9.516754  |
| 238 | 6 | 0 | 2.695823  | 4.967998  | -10.996890 |
| 239 | 1 | 0 | 2.003522  | 4.645533  | -11.782211 |
| 240 | 1 | 0 | 3.609687  | 4.370863  | -11.112705 |
| 241 | 6 | 0 | 3.019458  | 6.456702  | -11.126790 |
| 242 | 1 | 0 | 3.475594  | 6.656814  | -12.102040 |
| 243 | 1 | 0 | 2.087847  | 7.037414  | -11.086141 |
| 244 | 6 | 0 | 3.944872  | 6.911698  | -9.997041  |
| 245 | 1 | 0 | 4.145402  | 7.985600  | -10.072607 |
| 246 | 1 | 0 | 4.911975  | 6.399838  | -10.094393 |
| 247 | 6 | 0 | 3.334652  | 6.588507  | -8.632879  |
| 248 | 1 | 0 | 2.403567  | 7.152817  | -8.492010  |
| 249 | 1 | 0 | 4.009366  | 6.879817  | -7.820523  |
| 250 | 6 | 0 | 0.678907  | 2.795029  | -9.420243  |
| 251 | 1 | 0 | -0.175310 | 3.488212  | -9.369569  |
| 252 | 6 | 0 | 0.336574  | 1.359068  | -9.373489  |
| 253 | 6 | 0 | 1.339166  | 0.379192  | -9.372328  |
| 254 | 1 | 0 | 2.377801  | 0.699746  | -9.383619  |
| 255 | 6 | 0 | 1.008700  | -0.971016 | -9.373489  |
| 256 | 6 | 0 | -0.341193 | -1.349348 | -9.372328  |
| 257 | 1 | 0 | -0.582903 | -2.409110 | -9.383619  |
| 258 | 6 | 0 | -1.345274 | -0.388052 | -9.373489  |
| 259 | 6 | 0 | -0.997973 | 0.970156  | -9.372328  |
| 260 | 1 | 0 | -1.794899 | 1.709363  | -9.383619  |
| 261 | 6 | 0 | -2.760020 | -0.809564 | -9.420243  |
| 262 | 1 | 0 | -2.933226 | -1.895929 | -9.369569  |
| 263 | 6 | 0 | -5.060336 | -0.519315 | -9.631404  |

|     |   |   |           |           |            |
|-----|---|---|-----------|-----------|------------|
| 264 | 1 | 0 | -5.065935 | -1.618411 | -9.516754  |
| 265 | 6 | 0 | -5.920407 | 0.063104  | -8.498467  |
| 266 | 1 | 0 | -5.881947 | 1.164126  | -8.584859  |
| 267 | 6 | 0 | -7.373140 | -0.406360 | -8.632879  |
| 268 | 1 | 0 | -7.962779 | 0.032304  | -7.820523  |
| 269 | 1 | 0 | -7.396304 | -1.494859 | -8.492010  |
| 270 | 6 | 0 | -7.958143 | -0.039489 | -9.997041  |
| 271 | 1 | 0 | -7.998410 | 1.053976  | -10.094393 |
| 272 | 1 | 0 | -8.988433 | -0.402777 | -10.072607 |
| 273 | 6 | 0 | -7.101397 | -0.613424 | -11.126790 |
| 274 | 1 | 0 | -7.138503 | -1.710578 | -11.086141 |
| 275 | 1 | 0 | -7.502767 | -0.318454 | -12.102040 |
| 276 | 6 | 0 | -5.650324 | -0.149348 | -10.996890 |
| 277 | 1 | 0 | -5.590122 | 0.940649  | -11.112705 |
| 278 | 1 | 0 | -5.024911 | -0.587666 | -11.782211 |
| 279 | 6 | 0 | -5.033056 | 0.492538  | -6.388854  |
| 280 | 1 | 0 | -5.116977 | 1.569241  | -6.603735  |
| 281 | 7 | 0 | 4.510415  | 1.745763  | -1.942588  |
| 282 | 7 | 0 | 4.386003  | -1.152758 | -1.884753  |
| 283 | 7 | 0 | 3.031015  | -4.472649 | -7.227955  |
| 284 | 7 | 0 | 1.843842  | -3.225557 | -9.538046  |
| 285 | 6 | 0 | 3.069024  | 3.003188  | -4.175205  |
| 286 | 1 | 0 | 4.059677  | 2.630078  | -4.422867  |
| 287 | 6 | 0 | 2.507817  | 2.655651  | -2.940307  |
| 288 | 6 | 0 | 3.245021  | 1.835072  | -1.957419  |
| 289 | 1 | 0 | 2.619724  | 1.326066  | -1.209071  |
| 290 | 6 | 0 | 5.098313  | 0.932209  | -0.888923  |
| 291 | 1 | 0 | 4.350326  | 0.678291  | -0.120783  |
| 292 | 6 | 0 | 5.562281  | -0.409055 | -1.481317  |
| 293 | 1 | 0 | 6.235118  | -0.203765 | -2.333204  |
| 294 | 6 | 0 | 6.297964  | -1.236070 | -0.418116  |
| 295 | 1 | 0 | 6.645367  | -2.168078 | -0.879531  |
| 296 | 1 | 0 | 5.563978  | -1.515661 | 0.351236   |
| 297 | 6 | 0 | 7.455711  | -0.465573 | 0.213455   |
| 298 | 1 | 0 | 7.944566  | -1.087722 | 0.970820   |
| 299 | 1 | 0 | 8.211869  | -0.239764 | -0.551394  |
| 300 | 6 | 0 | 6.952021  | 0.839162  | 0.828792   |
| 301 | 1 | 0 | 7.778449  | 1.403448  | 1.273519   |
| 302 | 1 | 0 | 6.248078  | 0.608824  | 1.641434   |
| 303 | 6 | 0 | 6.246622  | 1.693361  | -0.224604  |
| 304 | 1 | 0 | 6.956440  | 2.005080  | -1.002463  |
| 305 | 1 | 0 | 5.842728  | 2.601822  | 0.234935   |
| 306 | 6 | 0 | 4.313013  | -1.620378 | -3.060296  |
| 307 | 1 | 0 | 5.103727  | -1.461222 | -3.810062  |
| 308 | 6 | 0 | 3.166293  | -2.455704 | -3.476640  |
| 309 | 6 | 0 | 2.082747  | -2.638142 | -2.606786  |
| 310 | 1 | 0 | 2.095969  | -2.117182 | -1.651353  |
| 311 | 6 | 0 | 1.045953  | -3.499659 | -2.940307  |
| 312 | 6 | 0 | 1.066325  | -4.159447 | -4.175205  |
| 313 | 1 | 0 | 0.247876  | -4.830823 | -4.422867  |
| 314 | 6 | 0 | 2.111203  | -3.945323 | -5.068872  |
| 315 | 6 | 0 | 3.169323  | -3.098032 | -4.709912  |
| 316 | 1 | 0 | 3.985448  | -2.960769 | -5.414559  |
| 317 | 6 | 0 | 2.089978  | -4.605023 | -6.388854  |
| 318 | 1 | 0 | 1.199486  | -5.216053 | -6.603735  |
| 319 | 6 | 0 | 2.905554  | -5.158775 | -8.498467  |
| 320 | 1 | 0 | 1.932811  | -5.675979 | -8.584859  |
| 321 | 6 | 0 | 2.979908  | -4.122722 | -9.631404  |
| 322 | 1 | 0 | 3.934552  | -3.578023 | -9.516754  |

|     |    |   |          |           |            |
|-----|----|---|----------|-----------|------------|
| 323 | 6  | 0 | 2.954501 | -4.818651 | -10.996890 |
| 324 | 1  | 0 | 3.021389 | -4.057868 | -11.782211 |
| 325 | 1  | 0 | 1.980435 | -5.311512 | -11.112705 |
| 326 | 6  | 0 | 4.081939 | -5.843279 | -11.126790 |
| 327 | 1  | 0 | 5.050656 | -5.326836 | -11.086141 |
| 328 | 1  | 0 | 4.027173 | -6.338359 | -12.102040 |
| 329 | 6  | 0 | 4.013270 | -6.872209 | -9.997041  |
| 330 | 1  | 0 | 3.086435 | -7.453814 | -10.094393 |
| 331 | 1  | 0 | 4.843032 | -7.582823 | -10.072607 |
| 332 | 6  | 0 | 4.038488 | -6.182146 | -8.632879  |
| 333 | 1  | 0 | 4.992738 | -5.657958 | -8.492010  |
| 334 | 1  | 0 | 3.953413 | -6.912121 | -7.820523  |
| 335 | 6  | 0 | 2.081112 | -1.985465 | -9.420243  |
| 336 | 1  | 0 | 3.108535 | -1.592283 | -9.369569  |
| 337 | 54 | 0 | 0.000000 | -0.000000 | 4.384123   |

Xe@w-to-w TS C3 cc3-rdim10

Standard orientation:

| Center<br>Number | Atomic<br>Number | Atomic<br>Type | Coordinates (Angstroms) |           |           |
|------------------|------------------|----------------|-------------------------|-----------|-----------|
|                  |                  |                | X                       | Y         | Z         |
| 1                | 7                | 0              | 2.587366                | 3.742409  | 1.678239  |
| 2                | 7                | 0              | 4.599528                | 1.648849  | 1.803663  |
| 3                | 7                | 0              | 1.947339                | -4.111930 | 1.678239  |
| 4                | 7                | 0              | -0.871819               | -4.807733 | 1.803663  |
| 5                | 6                | 0              | -0.156977               | 3.497674  | 2.363984  |
| 6                | 1                | 0              | 0.180022                | 3.156178  | 1.387199  |
| 7                | 6                | 0              | 0.798774                | 4.014036  | 3.249370  |
| 8                | 6                | 0              | 2.214595                | 4.106620  | 2.833740  |
| 9                | 1                | 0              | 2.913001                | 4.535113  | 3.569590  |
| 10               | 6                | 0              | 3.967508                | 3.948245  | 1.283386  |
| 11               | 1                | 0              | 4.597123                | 4.259298  | 2.136230  |
| 12               | 6                | 0              | 4.520406                | 2.626369  | 0.728606  |
| 13               | 1                | 0              | 3.811394                | 2.301559  | -0.051420 |
| 14               | 6                | 0              | 5.899113                | 2.809207  | 0.090703  |
| 15               | 1                | 0              | 6.212040                | 1.852375  | -0.340702 |
| 16               | 1                | 0              | 6.619716                | 3.066985  | 0.878214  |
| 17               | 6                | 0              | 5.878566                | 3.891645  | -0.988673 |
| 18               | 1                | 0              | 6.879901                | 4.011060  | -1.415632 |
| 19               | 1                | 0              | 5.216772                | 3.575762  | -1.807725 |
| 20               | 6                | 0              | 5.373616                | 5.214269  | -0.413739 |
| 21               | 1                | 0              | 5.338060                | 5.985481  | -1.190680 |
| 22               | 1                | 0              | 6.073864                | 5.567828  | 0.355927  |
| 23               | 6                | 0              | 3.985626                | 5.033535  | 0.197991  |
| 24               | 1                | 0              | 3.263321                | 4.741531  | -0.577850 |
| 25               | 1                | 0              | 3.620037                | 5.970050  | 0.635605  |
| 26               | 6                | 0              | 3.794337                | 0.671135  | 1.734272  |
| 27               | 1                | 0              | 3.084240                | 0.574080  | 0.901437  |
| 28               | 6                | 0              | 3.746800                | -0.426836 | 2.720177  |
| 29               | 6                | 0              | 4.348721                | -0.316561 | 3.980088  |
| 30               | 1                | 0              | 4.847312                | 0.613564  | 4.241527  |
| 31               | 6                | 0              | 4.301177                | -1.379735 | 4.876095  |
| 32               | 6                | 0              | 3.666662                | -2.574685 | 4.505522  |
| 33               | 1                | 0              | 3.652100                | -3.395617 | 5.217809  |
| 34               | 6                | 0              | 3.076871                | -2.698777 | 3.249370  |
| 35               | 6                | 0              | 3.107563                | -1.612891 | 2.363984  |
| 36               | 1                | 0              | 2.643319                | -1.733992 | 1.387199  |

|    |   |   |           |           |           |
|----|---|---|-----------|-----------|-----------|
| 37 | 6 | 0 | 2.449140  | -3.971206 | 2.833740  |
| 38 | 1 | 0 | 2.471022  | -4.790289 | 3.569590  |
| 39 | 6 | 0 | 1.435527  | -5.410086 | 1.283386  |
| 40 | 1 | 0 | 1.390098  | -6.110875 | 2.136230  |
| 41 | 6 | 0 | 0.014299  | -5.227971 | 0.728606  |
| 42 | 1 | 0 | 0.087511  | -4.451543 | -0.051420 |
| 43 | 6 | 0 | -0.516712 | -6.513385 | 0.090703  |
| 44 | 1 | 0 | -1.501817 | -6.305972 | -0.340702 |
| 45 | 1 | 0 | -0.653771 | -7.266334 | 0.878214  |
| 46 | 6 | 0 | 0.430980  | -7.036810 | -0.988673 |
| 47 | 1 | 0 | 0.488315  | -6.305738 | -1.807725 |
| 48 | 1 | 0 | 0.033729  | -7.963699 | -1.415632 |
| 49 | 6 | 0 | 1.828881  | -7.260823 | -0.413739 |
| 50 | 1 | 0 | 1.784949  | -8.044035 | 0.355927  |
| 51 | 1 | 0 | 2.514548  | -7.615636 | -1.190680 |
| 52 | 6 | 0 | 2.366356  | -5.968421 | 0.197991  |
| 53 | 1 | 0 | 2.474626  | -5.196885 | -0.577850 |
| 54 | 1 | 0 | 3.360196  | -6.120069 | 0.635605  |
| 55 | 6 | 0 | -1.315948 | -3.621560 | 1.734272  |
| 56 | 1 | 0 | -1.044953 | -2.958070 | 0.901437  |
| 57 | 7 | 0 | -0.582570 | 5.390550  | 7.037386  |
| 58 | 7 | 0 | -0.666527 | 3.654658  | 9.339681  |
| 59 | 7 | 0 | 3.498291  | -1.250100 | 9.339681  |
| 60 | 7 | 0 | 4.959638  | -2.190755 | 7.037386  |
| 61 | 6 | 0 | 0.396412  | 4.462765  | 4.505522  |
| 62 | 1 | 0 | 1.114640  | 4.860620  | 5.217809  |
| 63 | 6 | 0 | -0.955703 | 4.414796  | 4.876095  |
| 64 | 6 | 0 | -1.389681 | 4.883578  | 6.201599  |
| 65 | 1 | 0 | -2.461024 | 4.762497  | 6.425362  |
| 66 | 6 | 0 | -1.113733 | 5.820951  | 8.315539  |
| 67 | 1 | 0 | -2.188893 | 5.582832  | 8.408029  |
| 68 | 6 | 0 | -0.377528 | 5.072591  | 9.437975  |
| 69 | 1 | 0 | 0.702085  | 5.274349  | 9.315769  |
| 70 | 6 | 0 | -0.835698 | 5.578296  | 10.810638 |
| 71 | 1 | 0 | -0.285221 | 5.037019  | 11.587811 |
| 72 | 1 | 0 | -1.895993 | 5.321915  | 10.933901 |
| 73 | 6 | 0 | -0.639835 | 7.088378  | 10.948446 |
| 74 | 1 | 0 | -0.993374 | 7.423733  | 11.929143 |
| 75 | 1 | 0 | 0.432170  | 7.323287  | 10.899261 |
| 76 | 6 | 0 | -1.369519 | 7.834074  | 9.829868  |
| 77 | 1 | 0 | -1.198378 | 8.912672  | 9.910739  |
| 78 | 1 | 0 | -2.451258 | 7.674691  | 9.935729  |
| 79 | 6 | 0 | -0.914252 | 7.333976  | 8.458622  |
| 80 | 1 | 0 | 0.150888  | 7.554776  | 8.310510  |
| 81 | 1 | 0 | -1.458954 | 7.839679  | 7.653897  |
| 82 | 6 | 0 | 0.313978  | 2.859719  | 9.219423  |
| 83 | 1 | 0 | 1.353111  | 3.220829  | 9.168353  |
| 84 | 6 | 0 | 0.145981  | 1.393352  | 9.171250  |
| 85 | 6 | 0 | -1.131531 | 0.815406  | 9.169720  |
| 86 | 1 | 0 | -1.997799 | 1.471989  | 9.180291  |
| 87 | 6 | 0 | -1.279668 | -0.570252 | 9.171250  |
| 88 | 6 | 0 | -0.140397 | -1.387638 | 9.169720  |
| 89 | 1 | 0 | -0.275880 | -2.466139 | 9.180291  |
| 90 | 6 | 0 | 1.133687  | -0.823099 | 9.171250  |
| 91 | 6 | 0 | 1.271928  | 0.572231  | 9.169720  |
| 92 | 1 | 0 | 2.273679  | 0.994150  | 9.180291  |
| 93 | 6 | 0 | 2.319600  | -1.701773 | 9.219423  |
| 94 | 1 | 0 | 2.112764  | -2.782243 | 9.168353  |
| 95 | 6 | 0 | 4.581756  | -2.209346 | 9.437975  |

|     |   |   |           |           |           |
|-----|---|---|-----------|-----------|-----------|
| 96  | 1 | 0 | 4.216677  | -3.245198 | 9.315769  |
| 97  | 6 | 0 | 5.597958  | -1.945955 | 8.315539  |
| 98  | 1 | 0 | 5.929321  | -0.895780 | 8.408029  |
| 99  | 6 | 0 | 6.808535  | -2.875223 | 8.458622  |
| 100 | 1 | 0 | 7.518838  | -2.656349 | 7.653897  |
| 101 | 1 | 0 | 6.467184  | -3.908061 | 8.310510  |
| 102 | 6 | 0 | 7.469267  | -2.730999 | 9.829868  |
| 103 | 1 | 0 | 7.872106  | -1.714494 | 9.935729  |
| 104 | 1 | 0 | 8.317789  | -3.418510 | 9.910739  |
| 105 | 6 | 0 | 6.458633  | -2.990076 | 10.948446 |
| 106 | 1 | 0 | 6.126068  | -4.035913 | 10.899261 |
| 107 | 1 | 0 | 6.925829  | -2.851579 | 11.929143 |
| 108 | 6 | 0 | 5.248795  | -2.065412 | 10.810638 |
| 109 | 1 | 0 | 5.556910  | -1.018979 | 10.933901 |
| 110 | 1 | 0 | 4.504797  | -2.271501 | 11.587811 |
| 111 | 6 | 0 | 4.924143  | -1.238290 | 6.201599  |
| 112 | 1 | 0 | 5.354956  | -0.249940 | 6.425362  |
| 113 | 7 | 0 | -3.727709 | 3.158884  | 1.803663  |
| 114 | 7 | 0 | -4.534705 | 0.369520  | 1.678239  |
| 115 | 7 | 0 | -4.377069 | -3.199795 | 7.037386  |
| 116 | 7 | 0 | -2.831763 | -2.404559 | 9.339681  |
| 117 | 6 | 0 | -1.900211 | 3.924383  | 3.980088  |
| 118 | 1 | 0 | -2.955018 | 3.891113  | 4.241527  |
| 119 | 6 | 0 | -1.503749 | 3.458242  | 2.720177  |
| 120 | 6 | 0 | -2.478389 | 2.950424  | 1.734272  |
| 121 | 1 | 0 | -2.039288 | 2.383991  | 0.901437  |
| 122 | 6 | 0 | -4.534705 | 2.601602  | 0.728606  |
| 123 | 1 | 0 | -3.898905 | 2.149984  | -0.051420 |
| 124 | 6 | 0 | -5.403035 | 1.461840  | 1.283386  |
| 125 | 1 | 0 | -5.987222 | 1.851577  | 2.136230  |
| 126 | 6 | 0 | -6.351982 | 0.934886  | 0.197991  |
| 127 | 1 | 0 | -6.980233 | 0.150019  | 0.635605  |
| 128 | 1 | 0 | -5.737947 | 0.455353  | -0.577850 |
| 129 | 6 | 0 | -7.202497 | 2.046554  | -0.413739 |
| 130 | 1 | 0 | -7.852609 | 1.630155  | -1.190680 |
| 131 | 1 | 0 | -7.858813 | 2.476206  | 0.355927  |
| 132 | 6 | 0 | -6.309546 | 3.145165  | -0.988673 |
| 133 | 1 | 0 | -6.913630 | 3.952639  | -1.415632 |
| 134 | 1 | 0 | -5.705086 | 2.729976  | -1.807725 |
| 135 | 6 | 0 | -5.382401 | 3.704179  | 0.090703  |
| 136 | 1 | 0 | -5.965945 | 4.199349  | 0.878214  |
| 137 | 1 | 0 | -4.710224 | 4.453597  | -0.340702 |
| 138 | 6 | 0 | -4.663735 | -0.135414 | 2.833740  |
| 139 | 1 | 0 | -5.384023 | 0.255177  | 3.569590  |
| 140 | 6 | 0 | -3.875645 | -1.315260 | 3.249370  |
| 141 | 6 | 0 | -2.950586 | -1.884783 | 2.363984  |
| 142 | 1 | 0 | -2.823341 | -1.422186 | 1.387199  |
| 143 | 6 | 0 | -2.243051 | -3.031406 | 2.720177  |
| 144 | 6 | 0 | -2.448510 | -3.607822 | 3.980088  |
| 145 | 1 | 0 | -1.892294 | -4.504677 | 4.241527  |
| 146 | 6 | 0 | -3.345474 | -3.035061 | 4.876095  |
| 147 | 6 | 0 | -4.063074 | -1.888080 | 4.505522  |
| 148 | 1 | 0 | -4.766741 | -1.465003 | 5.217809  |
| 149 | 6 | 0 | -3.534462 | -3.645288 | 6.201599  |
| 150 | 1 | 0 | -2.893932 | -4.512558 | 6.425362  |
| 151 | 6 | 0 | -4.484225 | -3.874996 | 8.315539  |
| 152 | 1 | 0 | -3.740428 | -4.687053 | 8.408029  |
| 153 | 6 | 0 | -4.204228 | -2.863244 | 9.437975  |
| 154 | 1 | 0 | -4.918763 | -2.029151 | 9.315769  |



|     |   |   |           |           |           |
|-----|---|---|-----------|-----------|-----------|
| 155 | 6 | 0 | -4.413097 | -3.512884 | 10.810638 |
| 156 | 1 | 0 | -4.219576 | -2.765518 | 11.587811 |
| 157 | 1 | 0 | -3.660917 | -4.302936 | 10.933901 |
| 158 | 6 | 0 | -5.818799 | -4.098302 | 10.948446 |
| 159 | 1 | 0 | -6.558238 | -3.287374 | 10.899261 |
| 160 | 1 | 0 | -5.932455 | -4.572154 | 11.929143 |
| 161 | 6 | 0 | -6.099748 | -5.103075 | 9.829868  |
| 162 | 1 | 0 | -5.420848 | -5.960197 | 9.935729  |
| 163 | 1 | 0 | -7.119411 | -5.494162 | 9.910739  |
| 164 | 6 | 0 | -5.894283 | -4.458753 | 8.458622  |
| 165 | 1 | 0 | -6.618072 | -3.646715 | 8.310510  |
| 166 | 1 | 0 | -6.059885 | -5.183331 | 7.653897  |
| 167 | 6 | 0 | -2.633578 | -1.157946 | 9.219423  |
| 168 | 1 | 0 | -3.465875 | -0.438586 | 9.168353  |
| 169 | 7 | 0 | 0.784208  | 4.470380  | -1.765350 |
| 170 | 7 | 0 | -2.118980 | 4.380335  | -1.838395 |
| 171 | 7 | 0 | -4.263567 | -1.556046 | -1.765350 |
| 172 | 7 | 0 | -2.733992 | -4.025258 | -1.838395 |
| 173 | 6 | 0 | 2.469985  | 2.277874  | -2.466961 |
| 174 | 1 | 0 | 1.957145  | 2.247751  | -1.506725 |
| 175 | 6 | 0 | 2.194133  | 3.340020  | -3.339952 |
| 176 | 6 | 0 | 1.268663  | 4.418185  | -2.935266 |
| 177 | 1 | 0 | 1.055476  | 5.187067  | -3.694455 |
| 178 | 6 | 0 | -0.046661 | 5.599228  | -1.396079 |
| 179 | 1 | 0 | -0.290883 | 6.233886  | -2.266860 |
| 180 | 6 | 0 | -1.357363 | 5.058896  | -0.801041 |
| 181 | 1 | 0 | -1.057739 | 4.357037  | -0.007890 |
| 182 | 6 | 0 | -2.204369 | 6.172107  | -0.182303 |
| 183 | 1 | 0 | -3.089094 | 5.721422  | 0.280311  |
| 184 | 1 | 0 | -2.556289 | 6.831063  | -0.987154 |
| 185 | 6 | 0 | -1.415925 | 6.972205  | 0.854742  |
| 186 | 1 | 0 | -2.042099 | 7.772831  | 1.262255  |
| 187 | 1 | 0 | -1.148410 | 6.316126  | 1.695249  |
| 188 | 6 | 0 | -0.140397 | 7.543516  | 0.236872  |
| 189 | 1 | 0 | 0.436747  | 8.098434  | 0.984228  |
| 190 | 1 | 0 | -0.406754 | 8.256799  | -0.555575 |
| 191 | 6 | 0 | 0.715254  | 6.421326  | -0.347709 |
| 192 | 1 | 0 | 1.033587  | 5.733109  | 0.448587  |
| 193 | 1 | 0 | 1.627974  | 6.816075  | -0.809578 |
| 194 | 6 | 0 | -2.088514 | 3.111825  | -1.838331 |
| 195 | 1 | 0 | -1.514851 | 2.541280  | -1.092154 |
| 196 | 6 | 0 | -2.843471 | 2.296591  | -2.812077 |
| 197 | 6 | 0 | -3.233510 | 2.820815  | -4.050820 |
| 198 | 1 | 0 | -2.943139 | 3.838008  | -4.301572 |
| 199 | 6 | 0 | -3.967864 | 2.046204  | -4.942482 |
| 200 | 6 | 0 | -4.352184 | 0.748280  | -4.578000 |
| 201 | 1 | 0 | -4.941661 | 0.165701  | -5.281291 |
| 202 | 6 | 0 | -3.989608 | 0.230165  | -3.339952 |
| 203 | 6 | 0 | -3.207689 | 1.000133  | -2.466961 |
| 204 | 1 | 0 | -2.925181 | 0.571062  | -1.506725 |
| 205 | 6 | 0 | -4.460592 | -1.110398 | -2.935266 |
| 206 | 1 | 0 | -5.019870 | -1.679464 | -3.694455 |
| 207 | 6 | 0 | -4.825743 | -2.840024 | -1.396079 |
| 208 | 1 | 0 | -5.253262 | -3.368855 | -2.266860 |
| 209 | 6 | 0 | -3.702451 | -3.704959 | -0.801041 |
| 210 | 1 | 0 | -3.244435 | -3.094547 | -0.007890 |
| 211 | 6 | 0 | -4.243017 | -4.995093 | -0.182303 |
| 212 | 1 | 0 | -3.410350 | -5.535945 | 0.280311  |
| 213 | 1 | 0 | -4.637730 | -5.629343 | -0.987154 |

|     |   |   |           |           |            |
|-----|---|---|-----------|-----------|------------|
| 214 | 6 | 0 | -5.330145 | -4.712329 | 0.854742   |
| 215 | 1 | 0 | -4.895721 | -4.152615 | 1.695249   |
| 216 | 1 | 0 | -5.710419 | -5.654925 | 1.262255   |
| 217 | 6 | 0 | -6.462678 | -3.893345 | 0.236872   |
| 218 | 1 | 0 | -6.947221 | -4.480659 | -0.555575  |
| 219 | 1 | 0 | -7.231823 | -3.670983 | 0.984228   |
| 220 | 6 | 0 | -5.918658 | -2.591235 | -0.347709  |
| 221 | 1 | 0 | -5.481812 | -1.971442 | 0.448587   |
| 222 | 1 | 0 | -6.716881 | -1.998170 | -0.809578  |
| 223 | 6 | 0 | -1.650662 | -3.364619 | -1.838331  |
| 224 | 1 | 0 | -1.443388 | -2.582540 | -1.092154  |
| 225 | 7 | 0 | 4.209667  | 3.379038  | -7.094045  |
| 226 | 7 | 0 | 3.062179  | 2.103038  | -9.407806  |
| 227 | 7 | 0 | -3.352374 | 1.600405  | -9.407806  |
| 228 | 7 | 0 | -5.031166 | 1.956160  | -7.094045  |
| 229 | 6 | 0 | 2.824122  | 3.394962  | -4.578000  |
| 230 | 1 | 0 | 2.614332  | 4.196754  | -5.281291  |
| 231 | 6 | 0 | 3.755996  | 2.413169  | -4.942482  |
| 232 | 6 | 0 | 4.416566  | 2.447177  | -6.259886  |
| 233 | 1 | 0 | 5.095651  | 1.608548  | -6.479097  |
| 234 | 6 | 0 | 4.902710  | 3.314909  | -8.365413  |
| 235 | 1 | 0 | 5.497473  | 2.387916  | -8.455862  |
| 236 | 6 | 0 | 3.863371  | 3.308863  | -9.497824  |
| 237 | 1 | 0 | 3.242676  | 4.215518  | -9.379716  |
| 238 | 6 | 0 | 4.558580  | 3.345121  | -10.863489 |
| 239 | 1 | 0 | 3.794650  | 3.352434  | -11.648564 |
| 240 | 1 | 0 | 5.129253  | 2.414917  | -10.982625 |
| 241 | 6 | 0 | 5.487793  | 4.552927  | -10.989304 |
| 242 | 1 | 0 | 5.985196  | 4.542456  | -11.964846 |
| 243 | 1 | 0 | 4.894022  | 5.476098  | -10.944791 |
| 244 | 6 | 0 | 6.519463  | 4.564251  | -9.859952  |
| 245 | 1 | 0 | 7.159953  | 5.449507  | -9.932567  |
| 246 | 1 | 0 | 7.174660  | 3.688293  | -9.960873  |
| 247 | 6 | 0 | 5.830182  | 4.528075  | -8.495604  |
| 248 | 1 | 0 | 5.229816  | 5.435777  | -8.351246  |
| 249 | 1 | 0 | 6.564904  | 4.499924  | -7.683577  |
| 250 | 6 | 0 | 1.806721  | 2.237355  | -9.290815  |
| 251 | 1 | 0 | 1.330052  | 3.228801  | -9.239590  |
| 252 | 6 | 0 | 0.884584  | 1.084713  | -9.245249  |
| 253 | 6 | 0 | 1.374108  | -0.229022 | -9.242230  |
| 254 | 1 | 0 | 2.450350  | -0.381581 | -9.251943  |
| 255 | 6 | 0 | 0.497097  | -1.308429 | -9.245249  |
| 256 | 6 | 0 | -0.885393 | -1.075501 | -9.242230  |
| 257 | 1 | 0 | -1.555634 | -1.931275 | -9.251943  |
| 258 | 6 | 0 | -1.381681 | 0.223715  | -9.245249  |
| 259 | 6 | 0 | -0.488715 | 1.304523  | -9.242230  |
| 260 | 1 | 0 | -0.894716 | 2.312856  | -9.251943  |
| 261 | 6 | 0 | -2.840967 | 0.445989  | -9.290815  |
| 262 | 1 | 0 | -3.461250 | -0.462541 | -9.239590  |
| 263 | 6 | 0 | -4.797245 | 1.691346  | -9.497824  |
| 264 | 1 | 0 | -5.272084 | 0.700481  | -9.379716  |
| 265 | 6 | 0 | -5.322151 | 2.588417  | -8.365413  |
| 266 | 1 | 0 | -4.816732 | 3.566993  | -8.455862  |
| 267 | 6 | 0 | -6.836520 | 2.785048  | -8.495604  |
| 268 | 1 | 0 | -7.179500 | 3.435412  | -7.683577  |
| 269 | 1 | 0 | -7.322428 | 1.811265  | -8.351246  |
| 270 | 6 | 0 | -7.212489 | 3.363895  | -9.859952  |
| 271 | 1 | 0 | -6.781486 | 4.369292  | -9.960873  |
| 272 | 1 | 0 | -8.299389 | 3.475948  | -9.932567  |

|     |   |   |           |           |            |
|-----|---|---|-----------|-----------|------------|
| 273 | 6 | 0 | -6.686847 | 2.476105  | -10.989304 |
| 274 | 1 | 0 | -7.189451 | 1.500299  | -10.944791 |
| 275 | 1 | 0 | -6.926481 | 2.912104  | -11.964846 |
| 276 | 6 | 0 | -5.176250 | 2.275285  | -10.863489 |
| 277 | 1 | 0 | -4.656006 | 3.234605  | -10.982625 |
| 278 | 1 | 0 | -4.800618 | 1.610047  | -11.648564 |
| 279 | 6 | 0 | -4.327600 | 2.601270  | -6.259886  |
| 280 | 1 | 0 | -3.940869 | 3.608689  | -6.479097  |
| 281 | 7 | 0 | 4.852972  | -0.355077 | -1.838395  |
| 282 | 7 | 0 | 3.479358  | -2.914334 | -1.765350  |
| 283 | 7 | 0 | 0.821499  | -5.335198 | -7.094045  |
| 284 | 7 | 0 | 0.290195  | -3.703444 | -9.407806  |
| 285 | 6 | 0 | 4.059652  | 1.389894  | -4.050820  |
| 286 | 1 | 0 | 4.795382  | 0.629829  | -4.301572  |
| 287 | 6 | 0 | 3.410642  | 1.314223  | -2.812077  |
| 288 | 6 | 0 | 3.739176  | 0.252794  | -1.838331  |
| 289 | 1 | 0 | 2.958239  | 0.041260  | -1.092154  |
| 290 | 6 | 0 | 5.059814  | -1.353937 | -0.801041  |
| 291 | 1 | 0 | 4.302174  | -1.262489 | -0.007890  |
| 292 | 6 | 0 | 4.872405  | -2.759204 | -1.396079  |
| 293 | 1 | 0 | 5.544145  | -2.865031 | -2.266860  |
| 294 | 6 | 0 | 5.203404  | -3.830091 | -0.347709  |
| 295 | 1 | 0 | 5.088907  | -4.817905 | -0.809578  |
| 296 | 1 | 0 | 4.448225  | -3.761668 | 0.448587   |
| 297 | 6 | 0 | 6.603075  | -3.650171 | 0.236872   |
| 298 | 1 | 0 | 6.795076  | -4.427451 | 0.984228   |
| 299 | 1 | 0 | 7.353975  | -3.776140 | -0.555575  |
| 300 | 6 | 0 | 6.746069  | -2.259876 | 0.854742   |
| 301 | 1 | 0 | 7.752519  | -2.117906 | 1.262255   |
| 302 | 1 | 0 | 6.044131  | -2.163511 | 1.695249   |
| 303 | 6 | 0 | 6.447386  | -1.177014 | -0.182303  |
| 304 | 1 | 0 | 7.194019  | -1.201720 | -0.987154  |
| 305 | 1 | 0 | 6.499443  | -0.185477 | 0.280311   |
| 306 | 6 | 0 | 3.191929  | -3.307787 | -2.935266  |
| 307 | 1 | 0 | 3.964394  | -3.507602 | -3.694455  |
| 308 | 6 | 0 | 1.795475  | -3.570185 | -3.339952  |
| 309 | 6 | 0 | 0.737704  | -3.278006 | -2.466961  |
| 310 | 1 | 0 | 0.968037  | -2.818812 | -1.506725  |
| 311 | 6 | 0 | -0.567171 | -3.610814 | -2.812077  |
| 312 | 6 | 0 | -0.826142 | -4.210709 | -4.050820  |
| 313 | 1 | 0 | -1.852244 | -4.467837 | -4.301572  |
| 314 | 6 | 0 | 0.211867  | -4.459373 | -4.942482  |
| 315 | 6 | 0 | 1.528062  | -4.143242 | -4.578000  |
| 316 | 1 | 0 | 2.327329  | -4.362454 | -5.281291  |
| 317 | 6 | 0 | -0.088965 | -5.048447 | -6.259886  |
| 318 | 1 | 0 | -1.154782 | -5.217238 | -6.479097  |
| 319 | 6 | 0 | 0.419441  | -5.903326 | -8.365413  |
| 320 | 1 | 0 | -0.680741 | -5.954909 | -8.455862  |
| 321 | 6 | 0 | 0.933874  | -5.000209 | -9.497824  |
| 322 | 1 | 0 | 2.029407  | -4.915999 | -9.379716  |
| 323 | 6 | 0 | 0.617670  | -5.620407 | -10.863489 |
| 324 | 1 | 0 | 1.005967  | -4.962480 | -11.648564 |
| 325 | 1 | 0 | -0.473247 | -5.649521 | -10.982625 |
| 326 | 6 | 0 | 1.199053  | -7.029032 | -10.989304 |
| 327 | 1 | 0 | 2.295428  | -6.976396 | -10.944791 |
| 328 | 1 | 0 | 0.941284  | -7.454560 | -11.964846 |
| 329 | 6 | 0 | 0.693026  | -7.928146 | -9.859952  |
| 330 | 1 | 0 | -0.393175 | -8.057585 | -9.960873  |
| 331 | 1 | 0 | 1.139435  | -8.925455 | -9.932567  |

|     |    |   |          |           |           |
|-----|----|---|----------|-----------|-----------|
| 332 | 6  | 0 | 1.006337 | -7.313124 | -8.495604 |
| 333 | 1  | 0 | 2.092613 | -7.247042 | -8.351246 |
| 334 | 1  | 0 | 0.614596 | -7.935335 | -7.683577 |
| 335 | 6  | 0 | 1.034246 | -2.683344 | -9.290815 |
| 336 | 1  | 0 | 2.131198 | -2.766260 | -9.239590 |
| 337 | 54 | 0 | 0.000000 | -0.000000 | 0.896856  |

-----  
Xe@w-to-w D3 cc3-rdim2

Standard orientation:

| Center<br>Number | Atomic<br>Number | Atomic<br>Type | Coordinates (Angstroms) |           |           |
|------------------|------------------|----------------|-------------------------|-----------|-----------|
|                  |                  |                | X                       | Y         | Z         |
| 1                | 7                | 0              | 4.331789                | 1.361362  | 1.717847  |
| 2                | 7                | 0              | 4.635140                | -1.527275 | 1.795463  |
| 3                | 7                | 0              | -0.986920               | -4.432121 | 1.717847  |
| 4                | 7                | 0              | -3.640229               | -3.250511 | 1.795463  |
| 5                | 6                | 0              | 1.963969                | 2.767552  | 2.421475  |
| 6                | 1                | 0              | 2.007197                | 2.261828  | 1.458309  |
| 7                | 6                | 0              | 3.048910                | 2.623816  | 3.297174  |
| 8                | 6                | 0              | 4.234253                | 1.842528  | 2.886190  |
| 9                | 1                | 0              | 5.034918                | 1.738125  | 3.635091  |
| 10               | 6                | 0              | 5.554403                | 0.687223  | 1.327697  |
| 11               | 1                | 0              | 6.232102                | 0.532290  | 2.186271  |
| 12               | 6                | 0              | 5.182925                | -0.685096 | 0.742494  |
| 13               | 1                | 0              | 4.427533                | -0.484689 | -0.034184 |
| 14               | 6                | 0              | 6.385604                | -1.375464 | 0.096970  |
| 15               | 1                | 0              | 6.046721                | -2.311761 | -0.359080 |
| 16               | 1                | 0              | 7.104406                | -1.635458 | 0.885457  |
| 17               | 6                | 0              | 7.048378                | -0.486780 | -0.955817 |
| 18               | 1                | 0              | 7.915593                | -1.000158 | -1.384278 |
| 19               | 1                | 0              | 6.342411                | -0.309486 | -1.779623 |
| 20               | 6                | 0              | 7.458611                | 0.853435  | -0.347396 |
| 21               | 1                | 0              | 7.913970                | 1.499650  | -1.105474 |
| 22               | 1                | 0              | 8.219161                | 0.684793  | 0.427768  |
| 23               | 6                | 0              | 6.245709                | 1.551532  | 0.264398  |
| 24               | 1                | 0              | 5.503878                | 1.775900  | -0.515569 |
| 25               | 1                | 0              | 6.526044                | 2.508295  | 0.720695  |
| 26               | 6                | 0              | 3.378798                | -1.704749 | 1.783916  |
| 27               | 1                | 0              | 2.738255                | -1.248310 | 1.015479  |
| 28               | 6                | 0              | 2.671032                | -2.552911 | 2.763751  |
| 29               | 6                | 0              | 3.233448                | -2.862245 | 4.008400  |
| 30               | 1                | 0              | 4.202716                | -2.441099 | 4.263545  |
| 31               | 6                | 0              | 2.554349                | -3.685739 | 4.900541  |
| 32               | 6                | 0              | 1.318495                | -4.237218 | 4.533324  |
| 33               | 1                | 0              | 0.813404                | -4.892186 | 5.238586  |
| 34               | 6                | 0              | 0.747837                | -3.952342 | 3.297174  |
| 35               | 6                | 0              | 1.414786                | -3.084623 | 2.421475  |
| 36               | 1                | 0              | 0.955202                | -2.869198 | 1.458309  |
| 37               | 6                | 0              | -0.521451               | -4.588235 | 2.886190  |
| 38               | 1                | 0              | -1.012199               | -5.229429 | 3.635091  |
| 39               | 6                | 0              | -2.182049               | -5.153866 | 1.327697  |
| 40               | 1                | 0              | -2.655074               | -5.663303 | 2.186271  |
| 41               | 6                | 0              | -3.184773               | -4.145996 | 0.742494  |
| 42               | 1                | 0              | -2.633520               | -3.592011 | -0.034184 |
| 43               | 6                | 0              | -4.383989               | -4.842363 | 0.096970  |
| 44               | 1                | 0              | -5.025405               | -4.080734 | -0.359080 |
| 45               | 1                | 0              | -4.968552               | -5.334867 | 0.885457  |

|     |   |   |           |           |           |
|-----|---|---|-----------|-----------|-----------|
| 46  | 6 | 0 | -3.945753 | -5.860685 | -0.955817 |
| 47  | 1 | 0 | -3.439228 | -5.337946 | -1.779623 |
| 48  | 1 | 0 | -4.823959 | -6.355026 | -1.384278 |
| 49  | 6 | 0 | -2.990209 | -6.886064 | -0.347396 |
| 50  | 1 | 0 | -3.516532 | -7.460398 | 0.427768  |
| 51  | 1 | 0 | -2.658250 | -7.603524 | -1.105474 |
| 52  | 6 | 0 | -1.779189 | -6.184709 | 0.264398  |
| 53  | 1 | 0 | -1.213965 | -5.654449 | -0.515569 |
| 54  | 1 | 0 | -1.090775 | -6.905868 | 0.720695  |
| 55  | 6 | 0 | -3.165755 | -2.073750 | 1.783916  |
| 56  | 1 | 0 | -2.450195 | -1.747243 | 1.015479  |
| 57  | 7 | 0 | 2.816908  | 4.618463  | 7.054774  |
| 58  | 7 | 0 | 1.689700  | 3.310991  | 9.361574  |
| 59  | 7 | 0 | 2.022552  | -3.118818 | 9.361574  |
| 60  | 7 | 0 | 2.591253  | -4.748745 | 7.054774  |
| 61  | 6 | 0 | 3.010291  | 3.260459  | 4.533324  |
| 62  | 1 | 0 | 3.830056  | 3.150522  | 5.238586  |
| 63  | 6 | 0 | 1.914769  | 4.055001  | 4.900541  |
| 64  | 6 | 0 | 1.869661  | 4.708135  | 6.217158  |
| 65  | 1 | 0 | 0.951215  | 5.275478  | 6.434012  |
| 66  | 6 | 0 | 2.660716  | 5.294277  | 8.327391  |
| 67  | 1 | 0 | 1.665254  | 5.766009  | 8.415584  |
| 68  | 6 | 0 | 2.783088  | 4.259277  | 9.457126  |
| 69  | 1 | 0 | 3.761989  | 3.759727  | 9.341139  |
| 70  | 6 | 0 | 2.725445  | 4.949203  | 10.824660 |
| 71  | 1 | 0 | 2.826601  | 4.189943  | 11.607781 |
| 72  | 1 | 0 | 1.729931  | 5.396961  | 10.941416 |
| 73  | 6 | 0 | 3.805091  | 6.023574  | 10.958026 |
| 74  | 1 | 0 | 3.728112  | 6.512530  | 11.934858 |
| 75  | 1 | 0 | 4.796268  | 5.551800  | 10.915642 |
| 76  | 6 | 0 | 3.689444  | 7.051953  | 9.831471  |
| 77  | 1 | 0 | 4.486077  | 7.799288  | 9.909288  |
| 78  | 1 | 0 | 2.737120  | 7.590436  | 9.930795  |
| 79  | 6 | 0 | 3.745766  | 6.368132  | 8.465004  |
| 80  | 1 | 0 | 4.722932  | 5.888490  | 8.322454  |
| 81  | 1 | 0 | 3.627286  | 7.096033  | 7.654979  |
| 82  | 6 | 0 | 1.983621  | 2.082861  | 9.246763  |
| 83  | 1 | 0 | 3.027940  | 1.736538  | 9.199162  |
| 84  | 6 | 0 | 0.958476  | 1.020953  | 9.200574  |
| 85  | 6 | 0 | -0.407181 | 1.338441  | 9.198980  |
| 86  | 1 | 0 | -0.696290 | 2.386335  | 9.209111  |
| 87  | 6 | 0 | -1.363409 | 0.319588  | 9.200574  |
| 88  | 6 | 0 | -0.955534 | -1.021850 | 9.198980  |
| 89  | 1 | 0 | -1.718482 | -1.796172 | 9.209111  |
| 90  | 6 | 0 | 0.404934  | -1.340541 | 9.200574  |
| 91  | 6 | 0 | 1.362715  | -0.316592 | 9.198980  |
| 92  | 1 | 0 | 2.414772  | -0.590163 | 9.209111  |
| 93  | 6 | 0 | 0.812000  | -2.759296 | 9.246763  |
| 94  | 1 | 0 | -0.010084 | -3.490542 | 9.199162  |
| 95  | 6 | 0 | 2.297099  | -4.539863 | 9.457126  |
| 96  | 1 | 0 | 1.375025  | -5.137842 | 9.341139  |
| 97  | 6 | 0 | 3.254621  | -4.951386 | 8.327391  |
| 98  | 1 | 0 | 4.160883  | -4.325157 | 8.415584  |
| 99  | 6 | 0 | 3.642081  | -6.427994 | 8.465004  |
| 100 | 1 | 0 | 4.331702  | -6.689338 | 7.654979  |
| 101 | 1 | 0 | 2.738115  | -7.034424 | 8.322454  |
| 102 | 6 | 0 | 4.262449  | -6.721129 | 9.831471  |
| 103 | 1 | 0 | 5.204951  | -6.165633 | 9.930795  |
| 104 | 1 | 0 | 4.511343  | -7.784701 | 9.909288  |

|     |   |   |           |           |           |
|-----|---|---|-----------|-----------|-----------|
| 105 | 6 | 0 | 3.314023  | -6.307093 | 10.958026 |
| 106 | 1 | 0 | 2.409866  | -6.929590 | 10.915642 |
| 107 | 1 | 0 | 3.775960  | -6.484904 | 11.934858 |
| 108 | 6 | 0 | 2.923413  | -4.834907 | 10.824660 |
| 109 | 1 | 0 | 3.808940  | -4.196645 | 10.941416 |
| 110 | 1 | 0 | 2.215297  | -4.542880 | 11.607781 |
| 111 | 6 | 0 | 3.142534  | -3.973241 | 6.217158  |
| 112 | 1 | 0 | 4.093091  | -3.461516 | 6.434012  |
| 113 | 7 | 0 | -0.994911 | 4.777786  | 1.795463  |
| 114 | 7 | 0 | -3.344869 | 3.070758  | 1.717847  |
| 115 | 7 | 0 | -5.408160 | 0.130282  | 7.054774  |
| 116 | 7 | 0 | -3.712252 | -0.192172 | 9.361574  |
| 117 | 6 | 0 | 0.862053  | 4.231370  | 4.008400  |
| 118 | 1 | 0 | 0.012696  | 4.860208  | 4.263545  |
| 119 | 6 | 0 | 0.875370  | 3.589638  | 2.763751  |
| 120 | 6 | 0 | -0.213043 | 3.778499  | 1.783916  |
| 121 | 1 | 0 | -0.288059 | 2.995553  | 1.015479  |
| 122 | 6 | 0 | -1.998152 | 4.831093  | 0.742494  |
| 123 | 1 | 0 | -1.794013 | 4.076700  | -0.034184 |
| 124 | 6 | 0 | -3.372354 | 4.466642  | 1.327697  |
| 125 | 1 | 0 | -3.577027 | 5.131013  | 2.186271  |
| 126 | 6 | 0 | -4.466521 | 4.633177  | 0.264398  |
| 127 | 1 | 0 | -5.435270 | 4.397573  | 0.720695  |
| 128 | 1 | 0 | -4.289914 | 3.878549  | -0.515569 |
| 129 | 6 | 0 | -4.468402 | 6.032629  | -0.347396 |
| 130 | 1 | 0 | -5.255720 | 6.103874  | -1.105474 |
| 131 | 1 | 0 | -4.702628 | 6.775606  | 0.427768  |
| 132 | 6 | 0 | -3.102625 | 6.347464  | -0.955817 |
| 133 | 1 | 0 | -3.091634 | 7.355184  | -1.384278 |
| 134 | 1 | 0 | -2.903183 | 5.647432  | -1.779623 |
| 135 | 6 | 0 | -2.001615 | 6.217827  | 0.096970  |
| 136 | 1 | 0 | -2.135854 | 6.970325  | 0.885457  |
| 137 | 1 | 0 | -1.021317 | 6.392495  | -0.359080 |
| 138 | 6 | 0 | -3.712802 | 2.745707  | 2.886190  |
| 139 | 1 | 0 | -4.022719 | 3.491304  | 3.635091  |
| 140 | 6 | 0 | -3.796747 | 1.328525  | 3.297174  |
| 141 | 6 | 0 | -3.378755 | 0.317071  | 2.421475  |
| 142 | 1 | 0 | -2.962400 | 0.607370  | 1.458309  |
| 143 | 6 | 0 | -3.546402 | -1.036726 | 2.763751  |
| 144 | 6 | 0 | -4.095501 | -1.369125 | 4.008400  |
| 145 | 1 | 0 | -4.215411 | -2.419109 | 4.263545  |
| 146 | 6 | 0 | -4.469118 | -0.369262 | 4.900541  |
| 147 | 6 | 0 | -4.328786 | 0.976759  | 4.533324  |
| 148 | 1 | 0 | -4.643460 | 1.741665  | 5.238586  |
| 149 | 6 | 0 | -5.012195 | -0.734893 | 6.217158  |
| 150 | 1 | 0 | -5.044306 | -1.813962 | 6.434012  |
| 151 | 6 | 0 | -5.915336 | -0.342891 | 8.327391  |
| 152 | 1 | 0 | -5.826137 | -1.440852 | 8.415584  |
| 153 | 6 | 0 | -5.080186 | 0.280586  | 9.457126  |
| 154 | 1 | 0 | -5.137014 | 1.378115  | 9.341139  |
| 155 | 6 | 0 | -5.648858 | -0.114296 | 10.824660 |
| 156 | 1 | 0 | -5.041898 | 0.352936  | 11.607781 |
| 157 | 1 | 0 | -5.538871 | -1.200316 | 10.941416 |
| 158 | 6 | 0 | -7.119114 | 0.283518  | 10.958026 |
| 159 | 1 | 0 | -7.206134 | 1.377790  | 10.915642 |
| 160 | 1 | 0 | -7.504072 | -0.027626 | 11.934858 |
| 161 | 6 | 0 | -7.951893 | -0.330824 | 9.831471  |
| 162 | 1 | 0 | -7.942071 | -1.424803 | 9.930795  |
| 163 | 1 | 0 | -8.997420 | -0.014587 | 9.909288  |

|     |   |   |           |           |           |
|-----|---|---|-----------|-----------|-----------|
| 164 | 6 | 0 | -7.387847 | 0.059863  | 8.465004  |
| 165 | 1 | 0 | -7.461048 | 1.145935  | 8.322454  |
| 166 | 1 | 0 | -7.958988 | -0.406695 | 7.654979  |
| 167 | 6 | 0 | -2.795621 | 0.676436  | 9.246763  |
| 168 | 1 | 0 | -3.017856 | 1.754004  | 9.199162  |
| 169 | 7 | 0 | 3.344869  | 3.070758  | -1.717847 |
| 170 | 7 | 0 | 0.994911  | 4.777786  | -1.795463 |
| 171 | 7 | 0 | -4.331789 | 1.361362  | -1.717847 |
| 172 | 7 | 0 | -4.635140 | -1.527275 | -1.795463 |
| 173 | 6 | 0 | 3.378755  | 0.317071  | -2.421475 |
| 174 | 1 | 0 | 2.962400  | 0.607370  | -1.458309 |
| 175 | 6 | 0 | 3.796747  | 1.328525  | -3.297174 |
| 176 | 6 | 0 | 3.712802  | 2.745707  | -2.886190 |
| 177 | 1 | 0 | 4.022719  | 3.491304  | -3.635091 |
| 178 | 6 | 0 | 3.372354  | 4.466642  | -1.327697 |
| 179 | 1 | 0 | 3.577027  | 5.131013  | -2.186271 |
| 180 | 6 | 0 | 1.998152  | 4.831093  | -0.742494 |
| 181 | 1 | 0 | 1.794013  | 4.076700  | 0.034184  |
| 182 | 6 | 0 | 2.001615  | 6.217827  | -0.096970 |
| 183 | 1 | 0 | 1.021317  | 6.392495  | 0.359080  |
| 184 | 1 | 0 | 2.135854  | 6.970325  | -0.885457 |
| 185 | 6 | 0 | 3.102625  | 6.347464  | 0.955817  |
| 186 | 1 | 0 | 3.091634  | 7.355184  | 1.384278  |
| 187 | 1 | 0 | 2.903183  | 5.647432  | 1.779623  |
| 188 | 6 | 0 | 4.468402  | 6.032629  | 0.347396  |
| 189 | 1 | 0 | 5.255720  | 6.103874  | 1.105474  |
| 190 | 1 | 0 | 4.702628  | 6.775606  | -0.427768 |
| 191 | 6 | 0 | 4.466521  | 4.633177  | -0.264398 |
| 192 | 1 | 0 | 4.289914  | 3.878549  | 0.515569  |
| 193 | 1 | 0 | 5.435270  | 4.397573  | -0.720695 |
| 194 | 6 | 0 | 0.213043  | 3.778499  | -1.783916 |
| 195 | 1 | 0 | 0.288059  | 2.995553  | -1.015479 |
| 196 | 6 | 0 | -0.875370 | 3.589638  | -2.763751 |
| 197 | 6 | 0 | -0.862053 | 4.231370  | -4.008400 |
| 198 | 1 | 0 | -0.012696 | 4.860208  | -4.263545 |
| 199 | 6 | 0 | -1.914769 | 4.055001  | -4.900541 |
| 200 | 6 | 0 | -3.010291 | 3.260459  | -4.533324 |
| 201 | 1 | 0 | -3.830056 | 3.150522  | -5.238586 |
| 202 | 6 | 0 | -3.048910 | 2.623816  | -3.297174 |
| 203 | 6 | 0 | -1.963969 | 2.767552  | -2.421475 |
| 204 | 1 | 0 | -2.007197 | 2.261828  | -1.458309 |
| 205 | 6 | 0 | -4.234253 | 1.842528  | -2.886190 |
| 206 | 1 | 0 | -5.034918 | 1.738125  | -3.635091 |
| 207 | 6 | 0 | -5.554403 | 0.687223  | -1.327697 |
| 208 | 1 | 0 | -6.232102 | 0.532290  | -2.186271 |
| 209 | 6 | 0 | -5.182925 | -0.685096 | -0.742494 |
| 210 | 1 | 0 | -4.427533 | -0.484689 | 0.034184  |
| 211 | 6 | 0 | -6.385604 | -1.375464 | -0.096970 |
| 212 | 1 | 0 | -6.046721 | -2.311761 | 0.359080  |
| 213 | 1 | 0 | -7.104406 | -1.635458 | -0.885457 |
| 214 | 6 | 0 | -7.048378 | -0.486780 | 0.955817  |
| 215 | 1 | 0 | -6.342411 | -0.309486 | 1.779623  |
| 216 | 1 | 0 | -7.915593 | -1.000158 | 1.384278  |
| 217 | 6 | 0 | -7.458611 | 0.853435  | 0.347396  |
| 218 | 1 | 0 | -8.219161 | 0.684793  | -0.427768 |
| 219 | 1 | 0 | -7.913970 | 1.499650  | 1.105474  |
| 220 | 6 | 0 | -6.245709 | 1.551532  | -0.264398 |
| 221 | 1 | 0 | -5.503878 | 1.775900  | 0.515569  |
| 222 | 1 | 0 | -6.526044 | 2.508295  | -0.720695 |

|     |   |   |           |           |            |
|-----|---|---|-----------|-----------|------------|
| 223 | 6 | 0 | -3.378798 | -1.704749 | -1.783916  |
| 224 | 1 | 0 | -2.738255 | -1.248310 | -1.015479  |
| 225 | 7 | 0 | 5.408160  | 0.130282  | -7.054774  |
| 226 | 7 | 0 | 3.712252  | -0.192172 | -9.361574  |
| 227 | 7 | 0 | -1.689700 | 3.310991  | -9.361574  |
| 228 | 7 | 0 | -2.816908 | 4.618463  | -7.054774  |
| 229 | 6 | 0 | 4.328786  | 0.976759  | -4.533324  |
| 230 | 1 | 0 | 4.643460  | 1.741665  | -5.238586  |
| 231 | 6 | 0 | 4.469118  | -0.369262 | -4.900541  |
| 232 | 6 | 0 | 5.012195  | -0.734893 | -6.217158  |
| 233 | 1 | 0 | 5.044306  | -1.813962 | -6.434012  |
| 234 | 6 | 0 | 5.915336  | -0.342891 | -8.327391  |
| 235 | 1 | 0 | 5.826137  | -1.440852 | -8.415584  |
| 236 | 6 | 0 | 5.080186  | 0.280586  | -9.457126  |
| 237 | 1 | 0 | 5.137014  | 1.378115  | -9.341139  |
| 238 | 6 | 0 | 5.648858  | -0.114296 | -10.824660 |
| 239 | 1 | 0 | 5.041898  | 0.352936  | -11.607781 |
| 240 | 1 | 0 | 5.538871  | -1.200316 | -10.941416 |
| 241 | 6 | 0 | 7.119114  | 0.283518  | -10.958026 |
| 242 | 1 | 0 | 7.504072  | -0.027626 | -11.934858 |
| 243 | 1 | 0 | 7.206134  | 1.377790  | -10.915642 |
| 244 | 6 | 0 | 7.951893  | -0.330824 | -9.831471  |
| 245 | 1 | 0 | 8.997420  | -0.014587 | -9.909288  |
| 246 | 1 | 0 | 7.942071  | -1.424803 | -9.930795  |
| 247 | 6 | 0 | 7.387847  | 0.059863  | -8.465004  |
| 248 | 1 | 0 | 7.461048  | 1.145935  | -8.322454  |
| 249 | 1 | 0 | 7.958988  | -0.406695 | -7.654979  |
| 250 | 6 | 0 | 2.795621  | 0.676436  | -9.246763  |
| 251 | 1 | 0 | 3.017856  | 1.754004  | -9.199162  |
| 252 | 6 | 0 | 1.363409  | 0.319588  | -9.200574  |
| 253 | 6 | 0 | 0.955534  | -1.021850 | -9.198980  |
| 254 | 1 | 0 | 1.718482  | -1.796172 | -9.209111  |
| 255 | 6 | 0 | -0.404934 | -1.340541 | -9.200574  |
| 256 | 6 | 0 | -1.362715 | -0.316592 | -9.198980  |
| 257 | 1 | 0 | -2.414772 | -0.590163 | -9.209111  |
| 258 | 6 | 0 | -0.958476 | 1.020953  | -9.200574  |
| 259 | 6 | 0 | 0.407181  | 1.338441  | -9.198980  |
| 260 | 1 | 0 | 0.696290  | 2.386335  | -9.209111  |
| 261 | 6 | 0 | -1.983621 | 2.082861  | -9.246763  |
| 262 | 1 | 0 | -3.027940 | 1.736538  | -9.199162  |
| 263 | 6 | 0 | -2.783088 | 4.259277  | -9.457126  |
| 264 | 1 | 0 | -3.761989 | 3.759727  | -9.341139  |
| 265 | 6 | 0 | -2.660716 | 5.294277  | -8.327391  |
| 266 | 1 | 0 | -1.665254 | 5.766009  | -8.415584  |
| 267 | 6 | 0 | -3.745766 | 6.368132  | -8.465004  |
| 268 | 1 | 0 | -3.627286 | 7.096033  | -7.654979  |
| 269 | 1 | 0 | -4.722932 | 5.888490  | -8.322454  |
| 270 | 6 | 0 | -3.689444 | 7.051953  | -9.831471  |
| 271 | 1 | 0 | -2.737120 | 7.590436  | -9.930795  |
| 272 | 1 | 0 | -4.486077 | 7.799288  | -9.909288  |
| 273 | 6 | 0 | -3.805091 | 6.023574  | -10.958026 |
| 274 | 1 | 0 | -4.796268 | 5.551800  | -10.915642 |
| 275 | 1 | 0 | -3.728112 | 6.512530  | -11.934858 |
| 276 | 6 | 0 | -2.725445 | 4.949203  | -10.824660 |
| 277 | 1 | 0 | -1.729931 | 5.396961  | -10.941416 |
| 278 | 1 | 0 | -2.826601 | 4.189943  | -11.607781 |
| 279 | 6 | 0 | -1.869661 | 4.708135  | -6.217158  |
| 280 | 1 | 0 | -0.951215 | 5.275478  | -6.434012  |
| 281 | 7 | 0 | 3.640229  | -3.250511 | -1.795463  |



|     |    |   |           |           |            |
|-----|----|---|-----------|-----------|------------|
| 282 | 7  | 0 | 0.986920  | -4.432121 | -1.717847  |
| 283 | 7  | 0 | -2.591253 | -4.748745 | -7.054774  |
| 284 | 7  | 0 | -2.022552 | -3.118818 | -9.361574  |
| 285 | 6  | 0 | 4.095501  | -1.369125 | -4.008400  |
| 286 | 1  | 0 | 4.215411  | -2.419109 | -4.263545  |
| 287 | 6  | 0 | 3.546402  | -1.036726 | -2.763751  |
| 288 | 6  | 0 | 3.165755  | -2.073750 | -1.783916  |
| 289 | 1  | 0 | 2.450195  | -1.747243 | -1.015479  |
| 290 | 6  | 0 | 3.184773  | -4.145996 | -0.742494  |
| 291 | 1  | 0 | 2.633520  | -3.592011 | 0.034184   |
| 292 | 6  | 0 | 2.182049  | -5.153866 | -1.327697  |
| 293 | 1  | 0 | 2.655074  | -5.663303 | -2.186271  |
| 294 | 6  | 0 | 1.779189  | -6.184709 | -0.264398  |
| 295 | 1  | 0 | 1.090775  | -6.905868 | -0.720695  |
| 296 | 1  | 0 | 1.213965  | -5.654449 | 0.515569   |
| 297 | 6  | 0 | 2.990209  | -6.886064 | 0.347396   |
| 298 | 1  | 0 | 2.658250  | -7.603524 | 1.105474   |
| 299 | 1  | 0 | 3.516532  | -7.460398 | -0.427768  |
| 300 | 6  | 0 | 3.945753  | -5.860685 | 0.955817   |
| 301 | 1  | 0 | 4.823959  | -6.355026 | 1.384278   |
| 302 | 1  | 0 | 3.439228  | -5.337946 | 1.779623   |
| 303 | 6  | 0 | 4.383989  | -4.842363 | -0.096970  |
| 304 | 1  | 0 | 4.968552  | -5.334867 | -0.885457  |
| 305 | 1  | 0 | 5.025405  | -4.080734 | 0.359080   |
| 306 | 6  | 0 | 0.521451  | -4.588235 | -2.886190  |
| 307 | 1  | 0 | 1.012199  | -5.229429 | -3.635091  |
| 308 | 6  | 0 | -0.747837 | -3.952342 | -3.297174  |
| 309 | 6  | 0 | -1.414786 | -3.084623 | -2.421475  |
| 310 | 1  | 0 | -0.955202 | -2.869198 | -1.458309  |
| 311 | 6  | 0 | -2.671032 | -2.552911 | -2.763751  |
| 312 | 6  | 0 | -3.233448 | -2.862245 | -4.008400  |
| 313 | 1  | 0 | -4.202716 | -2.441099 | -4.263545  |
| 314 | 6  | 0 | -2.554349 | -3.685739 | -4.900541  |
| 315 | 6  | 0 | -1.318495 | -4.237218 | -4.533324  |
| 316 | 1  | 0 | -0.813404 | -4.892186 | -5.238586  |
| 317 | 6  | 0 | -3.142534 | -3.973241 | -6.217158  |
| 318 | 1  | 0 | -4.093091 | -3.461516 | -6.434012  |
| 319 | 6  | 0 | -3.254621 | -4.951386 | -8.327391  |
| 320 | 1  | 0 | -4.160883 | -4.325157 | -8.415584  |
| 321 | 6  | 0 | -2.297099 | -4.539863 | -9.457126  |
| 322 | 1  | 0 | -1.375025 | -5.137842 | -9.341139  |
| 323 | 6  | 0 | -2.923413 | -4.834907 | -10.824660 |
| 324 | 1  | 0 | -2.215297 | -4.542880 | -11.607781 |
| 325 | 1  | 0 | -3.808940 | -4.196645 | -10.941416 |
| 326 | 6  | 0 | -3.314023 | -6.307093 | -10.958026 |
| 327 | 1  | 0 | -2.409866 | -6.929590 | -10.915642 |
| 328 | 1  | 0 | -3.775960 | -6.484904 | -11.934858 |
| 329 | 6  | 0 | -4.262449 | -6.721129 | -9.831471  |
| 330 | 1  | 0 | -5.204951 | -6.165633 | -9.930795  |
| 331 | 1  | 0 | -4.511343 | -7.784701 | -9.909288  |
| 332 | 6  | 0 | -3.642081 | -6.427994 | -8.465004  |
| 333 | 1  | 0 | -2.738115 | -7.034424 | -8.322454  |
| 334 | 1  | 0 | -4.331702 | -6.689338 | -7.654979  |
| 335 | 6  | 0 | -0.812000 | -2.759296 | -9.246763  |
| 336 | 1  | 0 | 0.010083  | -3.490542 | -9.199162  |
| 337 | 54 | 0 | 0.000000  | 0.000000  | 0.000000   |

-----

3Xe@w-to-w D3 cc3-rdim3

## Standard orientation:

| Center<br>Number | Atomic<br>Number | Atomic<br>Type | Coordinates (Angstroms) |           |           |
|------------------|------------------|----------------|-------------------------|-----------|-----------|
|                  |                  |                | X                       | Y         | Z         |
| 1                | 7                | 0              | 4.320279                | 1.367271  | 1.694773  |
| 2                | 7                | 0              | 4.605178                | -1.512032 | 1.781285  |
| 3                | 7                | 0              | -0.976048               | -4.425107 | 1.694773  |
| 4                | 7                | 0              | -3.612047               | -3.232185 | 1.781285  |
| 5                | 6                | 0              | 1.936130                | 2.733932  | 2.417247  |
| 6                | 1                | 0              | 1.983728                | 2.241843  | 1.447070  |
| 7                | 6                | 0              | 3.015036                | 2.574186  | 3.297837  |
| 8                | 6                | 0              | 4.205322                | 1.804432  | 2.878769  |
| 9                | 1                | 0              | 4.992550                | 1.667624  | 3.636517  |
| 10               | 6                | 0              | 5.539354                | 0.690033  | 1.301193  |
| 11               | 1                | 0              | 6.218341                | 0.531144  | 2.158126  |
| 12               | 6                | 0              | 5.157564                | -0.682296 | 0.721539  |
| 13               | 1                | 0              | 4.403643                | -0.480916 | -0.056516 |
| 14               | 6                | 0              | 6.354320                | -1.383890 | 0.077906  |
| 15               | 1                | 0              | 6.008437                | -2.319620 | -0.373958 |
| 16               | 1                | 0              | 7.073370                | -1.644759 | 0.865863  |
| 17               | 6                | 0              | 7.018800                | -0.503740 | -0.980589 |
| 18               | 1                | 0              | 7.881240                | -1.024219 | -1.410110 |
| 19               | 1                | 0              | 6.310553                | -0.325985 | -1.802524 |
| 20               | 6                | 0              | 7.439220                | 0.836684  | -0.379206 |
| 21               | 1                | 0              | 7.897176                | 1.476296  | -1.141292 |
| 22               | 1                | 0              | 8.200903                | 0.665916  | 0.394398  |
| 23               | 6                | 0              | 6.233129                | 1.546295  | 0.233601  |
| 24               | 1                | 0              | 5.490336                | 1.773557  | -0.544552 |
| 25               | 1                | 0              | 6.522151                | 2.502337  | 0.685863  |
| 26               | 6                | 0              | 3.346830                | -1.673621 | 1.775944  |
| 27               | 1                | 0              | 2.709131                | -1.219735 | 1.003745  |
| 28               | 6                | 0              | 2.634335                | -2.508777 | 2.763108  |
| 29               | 6                | 0              | 3.189987                | -2.800841 | 4.015132  |
| 30               | 1                | 0              | 4.159350                | -2.378781 | 4.268462  |
| 31               | 6                | 0              | 2.507335                | -3.616140 | 4.912428  |
| 32               | 6                | 0              | 1.271484                | -4.169645 | 4.546642  |
| 33               | 1                | 0              | 0.765704                | -4.820415 | 5.255266  |
| 34               | 6                | 0              | 0.721793                | -3.898191 | 3.297837  |
| 35               | 6                | 0              | 1.399590                | -3.043704 | 2.417247  |
| 36               | 1                | 0              | 0.949629                | -2.838880 | 1.447070  |
| 37               | 6                | 0              | -0.539977               | -4.544132 | 2.878769  |
| 38               | 1                | 0              | -1.052070               | -5.157487 | 3.636517  |
| 39               | 6                | 0              | -2.172091               | -5.142238 | 1.301193  |
| 40               | 1                | 0              | -2.649186               | -5.650813 | 2.158126  |
| 41               | 6                | 0              | -3.169668               | -4.125434 | 0.721539  |
| 42               | 1                | 0              | -2.618307               | -3.573209 | -0.056516 |
| 43               | 6                | 0              | -4.375644               | -4.811058 | 0.077906  |
| 44               | 1                | 0              | -5.013068               | -4.043649 | -0.373958 |
| 45               | 1                | 0              | -4.961088               | -5.303339 | 0.865863  |
| 46               | 6                | 0              | -3.945652               | -5.826589 | -0.980589 |
| 47               | 1                | 0              | -3.437588               | -5.302107 | -1.802524 |
| 48               | 1                | 0              | -4.827620               | -6.313245 | -1.410110 |
| 49               | 6                | 0              | -2.995020               | -6.860896 | -0.379206 |
| 50               | 1                | 0              | -3.523751               | -7.435148 | 0.394398  |
| 51               | 1                | 0              | -2.670078               | -7.577303 | -1.141292 |
| 52               | 6                | 0              | -1.777434               | -6.171196 | 0.233601  |
| 53               | 1                | 0              | -1.209222               | -5.641549 | -0.544552 |
| 54               | 1                | 0              | -1.093988               | -6.899517 | 0.685863  |

|     |   |   |           |           |           |
|-----|---|---|-----------|-----------|-----------|
| 55  | 6 | 0 | -3.122813 | -2.061629 | 1.775944  |
| 56  | 1 | 0 | -2.410887 | -1.736309 | 1.003745  |
| 57  | 7 | 0 | 2.806216  | 4.588689  | 7.044205  |
| 58  | 7 | 0 | 1.707319  | 3.292549  | 9.359647  |
| 59  | 7 | 0 | 1.997772  | -3.124856 | 9.359647  |
| 60  | 7 | 0 | 2.570813  | -4.724599 | 7.044205  |
| 61  | 6 | 0 | 2.975276  | 3.185960  | 4.546642  |
| 62  | 1 | 0 | 3.791750  | 3.073327  | 5.255266  |
| 63  | 6 | 0 | 1.878002  | 3.979486  | 4.912428  |
| 64  | 6 | 0 | 1.834474  | 4.638650  | 6.231772  |
| 65  | 1 | 0 | 0.905466  | 5.181314  | 6.465732  |
| 66  | 6 | 0 | 2.662756  | 5.271510  | 8.314291  |
| 67  | 1 | 0 | 1.666414  | 5.739318  | 8.412598  |
| 68  | 6 | 0 | 2.800793  | 4.240659  | 9.446522  |
| 69  | 1 | 0 | 3.779034  | 3.742354  | 9.320287  |
| 70  | 6 | 0 | 2.756776  | 4.934573  | 10.812146 |
| 71  | 1 | 0 | 2.869917  | 4.178542  | 11.596732 |
| 72  | 1 | 0 | 1.761158  | 5.379233  | 10.939057 |
| 73  | 6 | 0 | 3.834269  | 6.013288  | 10.928475 |
| 74  | 1 | 0 | 3.767226  | 6.505612  | 11.904347 |
| 75  | 1 | 0 | 4.826523  | 5.544795  | 10.876120 |
| 76  | 6 | 0 | 3.701950  | 7.037340  | 9.799736  |
| 77  | 1 | 0 | 4.496606  | 7.787876  | 9.866061  |
| 78  | 1 | 0 | 2.748898  | 7.572818  | 9.908223  |
| 79  | 6 | 0 | 3.745191  | 6.349315  | 8.434896  |
| 80  | 1 | 0 | 4.722263  | 5.872618  | 8.282547  |
| 81  | 1 | 0 | 3.614804  | 7.074159  | 7.624000  |
| 82  | 6 | 0 | 1.998295  | 2.067901  | 9.207287  |
| 83  | 1 | 0 | 3.041038  | 1.721957  | 9.132142  |
| 84  | 6 | 0 | 0.969041  | 1.010915  | 9.151839  |
| 85  | 6 | 0 | -0.394254 | 1.335277  | 9.149115  |
| 86  | 1 | 0 | -0.678674 | 2.384409  | 9.162378  |
| 87  | 6 | 0 | -1.359999 | 0.333757  | 9.151839  |
| 88  | 6 | 0 | -0.959257 | -1.009072 | 9.149115  |
| 89  | 1 | 0 | -1.725622 | -1.779953 | 9.162378  |
| 90  | 6 | 0 | 0.390958  | -1.344672 | 9.151839  |
| 91  | 6 | 0 | 1.353511  | -0.326204 | 9.149115  |
| 92  | 1 | 0 | 2.404296  | -0.604456 | 9.162378  |
| 93  | 6 | 0 | 0.791707  | -2.764525 | 9.207287  |
| 94  | 1 | 0 | -0.029260 | -3.494595 | 9.132142  |
| 95  | 6 | 0 | 2.272122  | -4.545887 | 9.446522  |
| 96  | 1 | 0 | 1.351457  | -5.143916 | 9.320287  |
| 97  | 6 | 0 | 3.233884  | -4.941769 | 8.314291  |
| 98  | 1 | 0 | 4.137188  | -4.312816 | 8.412598  |
| 99  | 6 | 0 | 3.626073  | -6.418088 | 8.434896  |
| 100 | 1 | 0 | 4.319000  | -6.667591 | 7.624000  |
| 101 | 1 | 0 | 2.724705  | -7.025909 | 8.282547  |
| 102 | 6 | 0 | 4.243540  | -6.724653 | 9.799736  |
| 103 | 1 | 0 | 5.183804  | -6.167024 | 9.908223  |
| 104 | 1 | 0 | 4.496196  | -7.788113 | 9.866061  |
| 105 | 6 | 0 | 3.290526  | -6.327218 | 10.928475 |
| 106 | 1 | 0 | 2.388672  | -6.952289 | 10.876120 |
| 107 | 1 | 0 | 3.750412  | -6.515319 | 11.904347 |
| 108 | 6 | 0 | 2.895078  | -4.854724 | 10.812146 |
| 109 | 1 | 0 | 3.777974  | -4.214824 | 10.939057 |
| 110 | 1 | 0 | 2.183765  | -4.574692 | 11.596732 |
| 111 | 6 | 0 | 3.099952  | -3.908026 | 6.231772  |
| 112 | 1 | 0 | 4.034417  | -3.374813 | 6.465732  |
| 113 | 7 | 0 | -0.993131 | 4.744217  | 1.781285  |

|     |   |   |           |           |           |
|-----|---|---|-----------|-----------|-----------|
| 114 | 7 | 0 | -3.344231 | 3.057836  | 1.694773  |
| 115 | 7 | 0 | -5.377029 | 0.135910  | 7.044205  |
| 116 | 7 | 0 | -3.705091 | -0.167693 | 9.359647  |
| 117 | 6 | 0 | 0.830606  | 4.163030  | 4.015132  |
| 118 | 1 | 0 | -0.019590 | 4.791493  | 4.268462  |
| 119 | 6 | 0 | 0.855497  | 3.535790  | 2.763108  |
| 120 | 6 | 0 | -0.224017 | 3.735250  | 1.775944  |
| 121 | 1 | 0 | -0.298244 | 2.956044  | 1.003745  |
| 122 | 6 | 0 | -1.987896 | 4.807729  | 0.721539  |
| 123 | 1 | 0 | -1.785336 | 4.054125  | -0.056516 |
| 124 | 6 | 0 | -3.367263 | 4.452205  | 1.301193  |
| 125 | 1 | 0 | -3.569155 | 5.119669  | 2.158126  |
| 126 | 6 | 0 | -4.455695 | 4.624900  | 0.233601  |
| 127 | 1 | 0 | -5.428163 | 4.397180  | 0.685863  |
| 128 | 1 | 0 | -4.281113 | 3.867992  | -0.544552 |
| 129 | 6 | 0 | -4.444200 | 6.024211  | -0.379206 |
| 130 | 1 | 0 | -5.227098 | 6.101007  | -1.141292 |
| 131 | 1 | 0 | -4.677152 | 6.769232  | 0.394398  |
| 132 | 6 | 0 | -3.073148 | 6.330329  | -0.980589 |
| 133 | 1 | 0 | -3.053620 | 7.337463  | -1.410110 |
| 134 | 1 | 0 | -2.872965 | 5.628092  | -1.802524 |
| 135 | 6 | 0 | -1.978676 | 6.194948  | 0.077906  |
| 136 | 1 | 0 | -2.112282 | 6.948098  | 0.865863  |
| 137 | 1 | 0 | -0.995369 | 6.363269  | -0.373958 |
| 138 | 6 | 0 | -3.665345 | 2.739700  | 2.878769  |
| 139 | 1 | 0 | -3.940480 | 3.489863  | 3.636517  |
| 140 | 6 | 0 | -3.736828 | 1.324005  | 3.297837  |
| 141 | 6 | 0 | -3.335720 | 0.309772  | 2.417247  |
| 142 | 1 | 0 | -2.933357 | 0.597037  | 1.447070  |
| 143 | 6 | 0 | -3.489832 | -1.027013 | 2.763108  |
| 144 | 6 | 0 | -4.020593 | -1.362189 | 4.015132  |
| 145 | 1 | 0 | -4.139760 | -2.412712 | 4.268462  |
| 146 | 6 | 0 | -4.385337 | -0.363346 | 4.912428  |
| 147 | 6 | 0 | -4.246761 | 0.983685  | 4.546642  |
| 148 | 1 | 0 | -4.557454 | 1.747088  | 5.255266  |
| 149 | 6 | 0 | -4.934426 | -0.730624 | 6.231772  |
| 150 | 1 | 0 | -4.939882 | -1.806501 | 6.465732  |
| 151 | 6 | 0 | -5.896640 | -0.329741 | 8.314291  |
| 152 | 1 | 0 | -5.803602 | -1.426502 | 8.412598  |
| 153 | 6 | 0 | -5.072915 | 0.305228  | 9.446522  |
| 154 | 1 | 0 | -5.130491 | 1.401562  | 9.320287  |
| 155 | 6 | 0 | -5.651854 | -0.079849 | 10.812146 |
| 156 | 1 | 0 | -5.053682 | 0.396150  | 11.596732 |
| 157 | 1 | 0 | -5.539131 | -1.164409 | 10.939057 |
| 158 | 6 | 0 | -7.124795 | 0.313930  | 10.928475 |
| 159 | 1 | 0 | -7.215195 | 1.407494  | 10.876120 |
| 160 | 1 | 0 | -7.517638 | 0.009707  | 11.904347 |
| 161 | 6 | 0 | -7.945490 | -0.312687 | 9.799736  |
| 162 | 1 | 0 | -7.932702 | -1.405794 | 9.908223  |
| 163 | 1 | 0 | -8.992801 | 0.000237  | 9.866061  |
| 164 | 6 | 0 | -7.371264 | 0.068773  | 8.434896  |
| 165 | 1 | 0 | -7.446968 | 1.153291  | 8.282547  |
| 166 | 1 | 0 | -7.933803 | -0.406568 | 7.624000  |
| 167 | 6 | 0 | -2.790002 | 0.696624  | 9.207287  |
| 168 | 1 | 0 | -3.011778 | 1.772638  | 9.132142  |
| 169 | 7 | 0 | 3.344231  | 3.057836  | -1.694773 |
| 170 | 7 | 0 | 0.993131  | 4.744217  | -1.781285 |
| 171 | 7 | 0 | -4.320279 | 1.367271  | -1.694773 |
| 172 | 7 | 0 | -4.605178 | -1.512032 | -1.781285 |

|     |   |   |           |           |           |
|-----|---|---|-----------|-----------|-----------|
| 173 | 6 | 0 | 3.335720  | 0.309772  | -2.417247 |
| 174 | 1 | 0 | 2.933357  | 0.597037  | -1.447070 |
| 175 | 6 | 0 | 3.736828  | 1.324005  | -3.297837 |
| 176 | 6 | 0 | 3.665345  | 2.739700  | -2.878769 |
| 177 | 1 | 0 | 3.940480  | 3.489863  | -3.636517 |
| 178 | 6 | 0 | 3.367263  | 4.452205  | -1.301193 |
| 179 | 1 | 0 | 3.569155  | 5.119669  | -2.158126 |
| 180 | 6 | 0 | 1.987896  | 4.807729  | -0.721539 |
| 181 | 1 | 0 | 1.785336  | 4.054125  | 0.056516  |
| 182 | 6 | 0 | 1.978676  | 6.194948  | -0.077906 |
| 183 | 1 | 0 | 0.995369  | 6.363269  | 0.373958  |
| 184 | 1 | 0 | 2.112282  | 6.948098  | -0.865863 |
| 185 | 6 | 0 | 3.073148  | 6.330329  | 0.980589  |
| 186 | 1 | 0 | 3.053620  | 7.337463  | 1.410110  |
| 187 | 1 | 0 | 2.872965  | 5.628092  | 1.802524  |
| 188 | 6 | 0 | 4.444200  | 6.024211  | 0.379206  |
| 189 | 1 | 0 | 5.227098  | 6.101007  | 1.141292  |
| 190 | 1 | 0 | 4.677152  | 6.769232  | -0.394398 |
| 191 | 6 | 0 | 4.455695  | 4.624900  | -0.233601 |
| 192 | 1 | 0 | 4.281113  | 3.867992  | 0.544552  |
| 193 | 1 | 0 | 5.428163  | 4.397180  | -0.685863 |
| 194 | 6 | 0 | 0.224017  | 3.735250  | -1.775944 |
| 195 | 1 | 0 | 0.298244  | 2.956044  | -1.003745 |
| 196 | 6 | 0 | -0.855497 | 3.535790  | -2.763108 |
| 197 | 6 | 0 | -0.830606 | 4.163030  | -4.015132 |
| 198 | 1 | 0 | 0.019590  | 4.791493  | -4.268462 |
| 199 | 6 | 0 | -1.878002 | 3.979486  | -4.912428 |
| 200 | 6 | 0 | -2.975276 | 3.185960  | -4.546642 |
| 201 | 1 | 0 | -3.791750 | 3.073327  | -5.255266 |
| 202 | 6 | 0 | -3.015036 | 2.574186  | -3.297837 |
| 203 | 6 | 0 | -1.936130 | 2.733932  | -2.417247 |
| 204 | 1 | 0 | -1.983728 | 2.241843  | -1.447070 |
| 205 | 6 | 0 | -4.205322 | 1.804432  | -2.878769 |
| 206 | 1 | 0 | -4.992550 | 1.667624  | -3.636517 |
| 207 | 6 | 0 | -5.539354 | 0.690033  | -1.301193 |
| 208 | 1 | 0 | -6.218341 | 0.531144  | -2.158126 |
| 209 | 6 | 0 | -5.157564 | -0.682296 | -0.721539 |
| 210 | 1 | 0 | -4.403643 | -0.480916 | 0.056516  |
| 211 | 6 | 0 | -6.354320 | -1.383890 | -0.077906 |
| 212 | 1 | 0 | -6.008437 | -2.319620 | 0.373958  |
| 213 | 1 | 0 | -7.073370 | -1.644759 | -0.865863 |
| 214 | 6 | 0 | -7.018800 | -0.503740 | 0.980589  |
| 215 | 1 | 0 | -6.310553 | -0.325985 | 1.802524  |
| 216 | 1 | 0 | -7.881240 | -1.024219 | 1.410110  |
| 217 | 6 | 0 | -7.439220 | 0.836684  | 0.379206  |
| 218 | 1 | 0 | -8.200903 | 0.665916  | -0.394398 |
| 219 | 1 | 0 | -7.897176 | 1.476296  | 1.141292  |
| 220 | 6 | 0 | -6.233129 | 1.546295  | -0.233601 |
| 221 | 1 | 0 | -5.490336 | 1.773557  | 0.544552  |
| 222 | 1 | 0 | -6.522151 | 2.502337  | -0.685863 |
| 223 | 6 | 0 | -3.346830 | -1.673621 | -1.775944 |
| 224 | 1 | 0 | -2.709131 | -1.219735 | -1.003745 |
| 225 | 7 | 0 | 5.377029  | 0.135910  | -7.044205 |
| 226 | 7 | 0 | 3.705091  | -0.167693 | -9.359647 |
| 227 | 7 | 0 | -1.707319 | 3.292549  | -9.359647 |
| 228 | 7 | 0 | -2.806216 | 4.588689  | -7.044205 |
| 229 | 6 | 0 | 4.246761  | 0.983685  | -4.546642 |
| 230 | 1 | 0 | 4.557454  | 1.747088  | -5.255266 |
| 231 | 6 | 0 | 4.385337  | -0.363346 | -4.912428 |

|     |   |   |           |           |            |
|-----|---|---|-----------|-----------|------------|
| 232 | 6 | 0 | 4.934426  | -0.730624 | -6.231772  |
| 233 | 1 | 0 | 4.939882  | -1.806501 | -6.465732  |
| 234 | 6 | 0 | 5.896640  | -0.329741 | -8.314291  |
| 235 | 1 | 0 | 5.803602  | -1.426502 | -8.412598  |
| 236 | 6 | 0 | 5.072915  | 0.305228  | -9.446522  |
| 237 | 1 | 0 | 5.130491  | 1.401562  | -9.320287  |
| 238 | 6 | 0 | 5.651854  | -0.079849 | -10.812146 |
| 239 | 1 | 0 | 5.053682  | 0.396150  | -11.596732 |
| 240 | 1 | 0 | 5.539131  | -1.164409 | -10.939057 |
| 241 | 6 | 0 | 7.124795  | 0.313930  | -10.928475 |
| 242 | 1 | 0 | 7.517638  | 0.009707  | -11.904347 |
| 243 | 1 | 0 | 7.215195  | 1.407494  | -10.876120 |
| 244 | 6 | 0 | 7.945490  | -0.312687 | -9.799736  |
| 245 | 1 | 0 | 8.992801  | 0.000237  | -9.866061  |
| 246 | 1 | 0 | 7.932702  | -1.405794 | -9.908223  |
| 247 | 6 | 0 | 7.371264  | 0.068773  | -8.434896  |
| 248 | 1 | 0 | 7.446968  | 1.153291  | -8.282547  |
| 249 | 1 | 0 | 7.933803  | -0.406568 | -7.624000  |
| 250 | 6 | 0 | 2.790002  | 0.696624  | -9.207287  |
| 251 | 1 | 0 | 3.011778  | 1.772638  | -9.132142  |
| 252 | 6 | 0 | 1.359999  | 0.333757  | -9.151839  |
| 253 | 6 | 0 | 0.959257  | -1.009072 | -9.149115  |
| 254 | 1 | 0 | 1.725622  | -1.779953 | -9.162378  |
| 255 | 6 | 0 | -0.390958 | -1.344672 | -9.151839  |
| 256 | 6 | 0 | -1.353511 | -0.326204 | -9.149115  |
| 257 | 1 | 0 | -2.404296 | -0.604456 | -9.162378  |
| 258 | 6 | 0 | -0.969041 | 1.010915  | -9.151839  |
| 259 | 6 | 0 | 0.394254  | 1.335277  | -9.149115  |
| 260 | 1 | 0 | 0.678674  | 2.384409  | -9.162378  |
| 261 | 6 | 0 | -1.998295 | 2.067901  | -9.207287  |
| 262 | 1 | 0 | -3.041038 | 1.721957  | -9.132142  |
| 263 | 6 | 0 | -2.800793 | 4.240659  | -9.446522  |
| 264 | 1 | 0 | -3.779034 | 3.742354  | -9.320287  |
| 265 | 6 | 0 | -2.662756 | 5.271510  | -8.314291  |
| 266 | 1 | 0 | -1.666414 | 5.739318  | -8.412598  |
| 267 | 6 | 0 | -3.745191 | 6.349315  | -8.434896  |
| 268 | 1 | 0 | -3.614804 | 7.074159  | -7.624000  |
| 269 | 1 | 0 | -4.722263 | 5.872618  | -8.282547  |
| 270 | 6 | 0 | -3.701950 | 7.037340  | -9.799736  |
| 271 | 1 | 0 | -2.748898 | 7.572818  | -9.908223  |
| 272 | 1 | 0 | -4.496606 | 7.787876  | -9.866061  |
| 273 | 6 | 0 | -3.834269 | 6.013288  | -10.928475 |
| 274 | 1 | 0 | -4.826523 | 5.544795  | -10.876120 |
| 275 | 1 | 0 | -3.767226 | 6.505612  | -11.904347 |
| 276 | 6 | 0 | -2.756776 | 4.934573  | -10.812146 |
| 277 | 1 | 0 | -1.761158 | 5.379233  | -10.939057 |
| 278 | 1 | 0 | -2.869917 | 4.178542  | -11.596732 |
| 279 | 6 | 0 | -1.834474 | 4.638650  | -6.231772  |
| 280 | 1 | 0 | -0.905466 | 5.181314  | -6.465732  |
| 281 | 7 | 0 | 3.612047  | -3.232185 | -1.781285  |
| 282 | 7 | 0 | 0.976048  | -4.425107 | -1.694773  |
| 283 | 7 | 0 | -2.570813 | -4.724599 | -7.044205  |
| 284 | 7 | 0 | -1.997772 | -3.124856 | -9.359647  |
| 285 | 6 | 0 | 4.020593  | -1.362189 | -4.015132  |
| 286 | 1 | 0 | 4.139760  | -2.412712 | -4.268462  |
| 287 | 6 | 0 | 3.489832  | -1.027013 | -2.763108  |
| 288 | 6 | 0 | 3.122813  | -2.061629 | -1.775944  |
| 289 | 1 | 0 | 2.410887  | -1.736309 | -1.003745  |
| 290 | 6 | 0 | 3.169668  | -4.125434 | -0.721539  |

|     |    |   |           |           |            |
|-----|----|---|-----------|-----------|------------|
| 291 | 1  | 0 | 2.618307  | -3.573209 | 0.056516   |
| 292 | 6  | 0 | 2.172091  | -5.142238 | -1.301193  |
| 293 | 1  | 0 | 2.649186  | -5.650813 | -2.158126  |
| 294 | 6  | 0 | 1.777434  | -6.171196 | -0.233601  |
| 295 | 1  | 0 | 1.093988  | -6.899517 | -0.685863  |
| 296 | 1  | 0 | 1.209222  | -5.641549 | 0.544552   |
| 297 | 6  | 0 | 2.995020  | -6.860896 | 0.379206   |
| 298 | 1  | 0 | 2.670078  | -7.577303 | 1.141292   |
| 299 | 1  | 0 | 3.523751  | -7.435148 | -0.394398  |
| 300 | 6  | 0 | 3.945652  | -5.826589 | 0.980589   |
| 301 | 1  | 0 | 4.827620  | -6.313245 | 1.410110   |
| 302 | 1  | 0 | 3.437588  | -5.302107 | 1.802524   |
| 303 | 6  | 0 | 4.375644  | -4.811058 | -0.077906  |
| 304 | 1  | 0 | 4.961088  | -5.303339 | -0.865863  |
| 305 | 1  | 0 | 5.013068  | -4.043649 | 0.373958   |
| 306 | 6  | 0 | 0.539977  | -4.544132 | -2.878769  |
| 307 | 1  | 0 | 1.052070  | -5.157487 | -3.636517  |
| 308 | 6  | 0 | -0.721793 | -3.898191 | -3.297837  |
| 309 | 6  | 0 | -1.399590 | -3.043704 | -2.417247  |
| 310 | 1  | 0 | -0.949629 | -2.838880 | -1.447070  |
| 311 | 6  | 0 | -2.634335 | -2.508777 | -2.763108  |
| 312 | 6  | 0 | -3.189987 | -2.800841 | -4.015132  |
| 313 | 1  | 0 | -4.159350 | -2.378781 | -4.268462  |
| 314 | 6  | 0 | -2.507335 | -3.616140 | -4.912428  |
| 315 | 6  | 0 | -1.271484 | -4.169645 | -4.546642  |
| 316 | 1  | 0 | -0.765704 | -4.820415 | -5.255266  |
| 317 | 6  | 0 | -3.099952 | -3.908026 | -6.231772  |
| 318 | 1  | 0 | -4.034417 | -3.374813 | -6.465732  |
| 319 | 6  | 0 | -3.233884 | -4.941769 | -8.314291  |
| 320 | 1  | 0 | -4.137188 | -4.312816 | -8.412598  |
| 321 | 6  | 0 | -2.272122 | -4.545887 | -9.446522  |
| 322 | 1  | 0 | -1.351457 | -5.143916 | -9.320287  |
| 323 | 6  | 0 | -2.895078 | -4.854724 | -10.812146 |
| 324 | 1  | 0 | -2.183765 | -4.574692 | -11.596732 |
| 325 | 1  | 0 | -3.777974 | -4.214824 | -10.939057 |
| 326 | 6  | 0 | -3.290526 | -6.327218 | -10.928475 |
| 327 | 1  | 0 | -2.388672 | -6.952289 | -10.876120 |
| 328 | 1  | 0 | -3.750412 | -6.515319 | -11.904347 |
| 329 | 6  | 0 | -4.243540 | -6.724653 | -9.799736  |
| 330 | 1  | 0 | -5.183804 | -6.167024 | -9.908223  |
| 331 | 1  | 0 | -4.496196 | -7.788113 | -9.866061  |
| 332 | 6  | 0 | -3.626073 | -6.418088 | -8.434896  |
| 333 | 1  | 0 | -2.724705 | -7.025909 | -8.282547  |
| 334 | 1  | 0 | -4.319000 | -6.667591 | -7.624000  |
| 335 | 6  | 0 | -0.791707 | -2.764525 | -9.207287  |
| 336 | 1  | 0 | 0.029260  | -3.494595 | -9.132142  |
| 337 | 54 | 0 | 0.000000  | -0.000000 | 0.000000   |
| 338 | 54 | 0 | 0.000000  | 0.000000  | 4.234974   |
| 339 | 54 | 0 | 0.000000  | 0.000000  | -4.234974  |

Xe@w-to-w(R/S) S6 cc3-rdim5

Standard orientation:

| Center<br>Number | Atomic<br>Number | Atomic<br>Type | Coordinates (Angstroms) |          |          |
|------------------|------------------|----------------|-------------------------|----------|----------|
|                  |                  |                | X                       | Y        | Z        |
| 1                | 7                | 0              | -0.892505               | 4.680805 | 1.934157 |
| 2                | 7                | 0              | 1.945163                | 4.285446 | 1.644991 |

|    |   |   |           |           |           |
|----|---|---|-----------|-----------|-----------|
| 3  | 7 | 0 | 4.836817  | 2.349056  | 7.041404  |
| 4  | 7 | 0 | 3.448116  | 1.357058  | 9.361995  |
| 5  | 6 | 0 | -2.545778 | 3.474144  | 3.975839  |
| 6  | 1 | 0 | -2.025498 | 4.393746  | 4.231811  |
| 7  | 6 | 0 | -2.322114 | 2.906839  | 2.713801  |
| 8  | 6 | 0 | -1.449090 | 3.561383  | 1.718144  |
| 9  | 1 | 0 | -1.364837 | 3.046827  | 0.748121  |
| 10 | 6 | 0 | -0.124211 | 5.257691  | 0.845700  |
| 11 | 1 | 0 | -0.040992 | 4.560515  | -0.001989 |
| 12 | 6 | 0 | 1.302699  | 5.550577  | 1.334371  |
| 13 | 1 | 0 | 1.222993  | 6.192515  | 2.229988  |
| 14 | 6 | 0 | 2.108206  | 6.275970  | 0.251275  |
| 15 | 1 | 0 | 3.104710  | 6.506198  | 0.645758  |
| 16 | 1 | 0 | 2.249516  | 5.587492  | -0.593372 |
| 17 | 6 | 0 | 1.405297  | 7.545109  | -0.230609 |
| 18 | 1 | 0 | 1.999581  | 8.021526  | -1.017286 |
| 19 | 1 | 0 | 1.335035  | 8.264394  | 0.597185  |
| 20 | 6 | 0 | 0.000000  | 7.219884  | -0.737287 |
| 21 | 1 | 0 | -0.510398 | 8.129520  | -1.071345 |
| 22 | 1 | 0 | 0.073441  | 6.553798  | -1.609030 |
| 23 | 6 | 0 | -0.817624 | 6.531318  | 0.355174  |
| 24 | 1 | 0 | -0.960502 | 7.206750  | 1.209320  |
| 25 | 1 | 0 | -1.810104 | 6.255766  | -0.015854 |
| 26 | 6 | 0 | 2.267364  | 4.059383  | 2.851104  |
| 27 | 1 | 0 | 2.099254  | 4.800057  | 3.647525  |
| 28 | 6 | 0 | 2.919205  | 2.799358  | 3.262098  |
| 29 | 6 | 0 | 2.986304  | 1.716568  | 2.375474  |
| 30 | 1 | 0 | 2.494569  | 1.805577  | 1.411033  |
| 31 | 6 | 0 | 3.678453  | 0.557590  | 2.713801  |
| 32 | 6 | 0 | 4.281586  | 0.467636  | 3.975839  |
| 33 | 1 | 0 | 4.817845  | -0.442740 | 4.231811  |
| 34 | 6 | 0 | 4.186291  | 1.516467  | 4.879188  |
| 35 | 6 | 0 | 3.510079  | 2.690212  | 4.514589  |
| 36 | 1 | 0 | 3.470137  | 3.508926  | 5.228371  |
| 37 | 6 | 0 | 4.821038  | 1.395117  | 6.206633  |
| 38 | 1 | 0 | 5.288164  | 0.422072  | 6.424519  |
| 39 | 6 | 0 | 5.504403  | 2.127200  | 8.308865  |
| 40 | 1 | 0 | 5.875555  | 1.089843  | 8.394376  |
| 41 | 6 | 0 | 4.498405  | 2.352883  | 9.448494  |
| 42 | 1 | 0 | 4.095776  | 3.375577  | 9.333994  |
| 43 | 6 | 0 | 5.193446  | 2.231615  | 10.809198 |
| 44 | 1 | 0 | 4.455638  | 2.407101  | 11.599656 |
| 45 | 1 | 0 | 5.544133  | 1.197724  | 10.924256 |
| 46 | 6 | 0 | 6.368515  | 3.202561  | 10.927753 |
| 47 | 1 | 0 | 5.994759  | 4.234653  | 10.884271 |
| 48 | 1 | 0 | 6.856647  | 3.082631  | 11.900667 |
| 49 | 6 | 0 | 7.370080  | 2.982746  | 9.792615  |
| 50 | 1 | 0 | 7.814070  | 1.982820  | 9.891721  |
| 51 | 1 | 0 | 8.192253  | 3.702963  | 9.859779  |
| 52 | 6 | 0 | 6.682077  | 3.100457  | 8.432136  |
| 53 | 1 | 0 | 6.300340  | 4.119739  | 8.288883  |
| 54 | 1 | 0 | 7.386947  | 2.907405  | 7.616110  |
| 55 | 6 | 0 | 2.255808  | 1.768695  | 9.236901  |
| 56 | 1 | 0 | 2.012814  | 2.841942  | 9.179005  |
| 57 | 7 | 0 | -4.683887 | -0.458162 | 1.644991  |
| 58 | 7 | 0 | -3.607444 | -3.113335 | 1.934157  |
| 59 | 7 | 0 | 2.738724  | -3.827284 | 1.644991  |
| 60 | 7 | 0 | 4.499949  | -1.567470 | 1.934157  |
| 61 | 6 | 0 | -2.979743 | 1.727931  | 2.375474  |



|     |   |   |           |           |           |
|-----|---|---|-----------|-----------|-----------|
| 62  | 1 | 0 | -2.810960 | 1.257572  | 1.411033  |
| 63  | 6 | 0 | -3.883918 | 1.128427  | 3.262098  |
| 64  | 6 | 0 | -4.649211 | -0.066097 | 2.851104  |
| 65  | 1 | 0 | -5.206598 | -0.582021 | 3.647525  |
| 66  | 6 | 0 | -5.458290 | -1.647118 | 1.334371  |
| 67  | 1 | 0 | -5.974372 | -2.037114 | 2.229988  |
| 68  | 6 | 0 | -4.491188 | -2.736415 | 0.845700  |
| 69  | 1 | 0 | -3.929026 | -2.315758 | -0.001989 |
| 70  | 6 | 0 | -5.247475 | -3.973742 | 0.355174  |
| 71  | 1 | 0 | -4.512600 | -4.695479 | -0.015854 |
| 72  | 1 | 0 | -5.760978 | -4.435194 | 1.209320  |
| 73  | 6 | 0 | -6.252603 | -3.609942 | -0.737287 |
| 74  | 1 | 0 | -6.785172 | -4.506778 | -1.071345 |
| 75  | 1 | 0 | -5.712476 | -3.213297 | -1.609030 |
| 76  | 6 | 0 | -7.236905 | -2.555532 | -0.230609 |
| 77  | 1 | 0 | -7.946636 | -2.279075 | -1.017286 |
| 78  | 1 | 0 | -7.824693 | -2.976023 | 0.597185  |
| 79  | 6 | 0 | -6.489252 | -1.312225 | 0.251275  |
| 80  | 1 | 0 | -5.963668 | -0.845608 | -0.593372 |
| 81  | 1 | 0 | -7.186888 | -0.564341 | 0.645758  |
| 82  | 6 | 0 | -2.359703 | -3.035640 | 1.718144  |
| 83  | 1 | 0 | -1.956211 | -2.705397 | 0.748121  |
| 84  | 6 | 0 | -1.356339 | -3.464429 | 2.713801  |
| 85  | 6 | 0 | -1.735808 | -3.941780 | 3.975839  |
| 86  | 1 | 0 | -2.792347 | -3.951006 | 4.231811  |
| 87  | 6 | 0 | -0.779847 | -4.383668 | 4.879188  |
| 88  | 6 | 0 | 0.574752  | -4.384924 | 4.514589  |
| 89  | 1 | 0 | 1.303751  | -4.759690 | 5.228371  |
| 90  | 6 | 0 | 0.964713  | -3.927785 | 3.262098  |
| 91  | 6 | 0 | -0.006561 | -3.444499 | 2.375474  |
| 92  | 1 | 0 | 0.316391  | -3.063149 | 1.411033  |
| 93  | 6 | 0 | 2.381847  | -3.993286 | 2.851104  |
| 94  | 1 | 0 | 3.107344  | -4.218036 | 3.647525  |
| 95  | 6 | 0 | 4.155591  | -3.903459 | 1.334371  |
| 96  | 1 | 0 | 4.751379  | -4.155401 | 2.229988  |
| 97  | 6 | 0 | 4.615399  | -2.521276 | 0.845700  |
| 98  | 1 | 0 | 3.970018  | -2.244757 | -0.001989 |
| 99  | 6 | 0 | 6.065099  | -2.557576 | 0.355174  |
| 100 | 1 | 0 | 6.322704  | -1.560287 | -0.015854 |
| 101 | 1 | 0 | 6.721480  | -2.771556 | 1.209320  |
| 102 | 6 | 0 | 6.252603  | -3.609942 | -0.737287 |
| 103 | 1 | 0 | 5.639035  | -3.340501 | -1.609030 |
| 104 | 1 | 0 | 7.295570  | -3.622742 | -1.071345 |
| 105 | 6 | 0 | 5.831608  | -4.989577 | -0.230609 |
| 106 | 1 | 0 | 6.489658  | -5.288371 | 0.597185  |
| 107 | 1 | 0 | 5.947055  | -5.742451 | -1.017286 |
| 108 | 6 | 0 | 4.381046  | -4.963745 | 0.251275  |
| 109 | 1 | 0 | 3.714152  | -4.741884 | -0.593372 |
| 110 | 1 | 0 | 4.082178  | -5.941857 | 0.645758  |
| 111 | 6 | 0 | 3.808793  | -0.525743 | 1.718144  |
| 112 | 1 | 0 | 3.321048  | -0.341430 | 0.748121  |
| 113 | 7 | 0 | -4.452751 | 3.014278  | 7.041404  |
| 114 | 7 | 0 | -2.899305 | 2.307627  | 9.361995  |
| 115 | 7 | 0 | -0.548811 | -3.664685 | 9.361995  |
| 116 | 7 | 0 | -0.384066 | -5.363334 | 7.041404  |
| 117 | 6 | 0 | -4.084831 | 1.694712  | 4.514589  |
| 118 | 1 | 0 | -4.773888 | 1.250764  | 5.228371  |
| 119 | 6 | 0 | -3.406444 | 2.867201  | 4.879188  |
| 120 | 6 | 0 | -3.618726 | 3.477583  | 6.206633  |

|     |   |   |           |           |           |
|-----|---|---|-----------|-----------|-----------|
| 121 | 1 | 0 | -3.009607 | 4.368648  | 6.424519  |
| 122 | 6 | 0 | -4.594411 | 3.703353  | 8.308865  |
| 123 | 1 | 0 | -3.881609 | 4.543458  | 8.394376  |
| 124 | 6 | 0 | -4.286859 | 2.719292  | 9.448494  |
| 125 | 1 | 0 | -4.971223 | 1.859258  | 9.333994  |
| 126 | 6 | 0 | -4.529358 | 3.381849  | 10.809198 |
| 127 | 1 | 0 | -4.312430 | 2.655145  | 11.599656 |
| 128 | 1 | 0 | -3.809326 | 4.202498  | 10.924256 |
| 129 | 6 | 0 | -5.957757 | 3.914015  | 10.927753 |
| 130 | 1 | 0 | -6.097960 | 4.396715  | 11.900667 |
| 131 | 1 | 0 | -6.664697 | 3.074287  | 10.884271 |
| 132 | 6 | 0 | -6.268174 | 4.891304  | 9.792615  |
| 133 | 1 | 0 | -7.302987 | 5.243218  | 9.859779  |
| 134 | 1 | 0 | -5.624207 | 5.775773  | 9.891721  |
| 135 | 6 | 0 | -6.026113 | 4.236620  | 8.432136  |
| 136 | 1 | 0 | -6.717969 | 3.396385  | 8.288883  |
| 137 | 1 | 0 | -6.211360 | 4.943581  | 7.616110  |
| 138 | 6 | 0 | -2.659639 | 1.069240  | 9.236901  |
| 139 | 1 | 0 | -3.467601 | 0.322177  | 9.179005  |
| 140 | 6 | 0 | -1.304443 | 0.505247  | 9.178365  |
| 141 | 6 | 0 | -0.191059 | 1.365368  | 9.185449  |
| 142 | 1 | 0 | -0.364975 | 2.438875  | 9.203014  |
| 143 | 6 | 0 | 1.089778  | 0.877057  | 9.178365  |
| 144 | 6 | 0 | 1.277973  | -0.517222 | 9.185449  |
| 145 | 1 | 0 | 2.294615  | -0.903360 | 9.203014  |
| 146 | 6 | 0 | 0.214665  | -1.382304 | 9.178365  |
| 147 | 6 | 0 | -1.086914 | -0.848146 | 9.185449  |
| 148 | 1 | 0 | -1.929640 | -1.535515 | 9.203014  |
| 149 | 6 | 0 | 0.403831  | -2.837935 | 9.236901  |
| 150 | 1 | 0 | 1.454787  | -3.164119 | 9.179005  |
| 151 | 6 | 0 | -0.211546 | -5.072175 | 9.448494  |
| 152 | 1 | 0 | 0.875447  | -5.234835 | 9.333994  |
| 153 | 6 | 0 | -0.909992 | -5.830553 | 8.308865  |
| 154 | 1 | 0 | -1.993946 | -5.633301 | 8.394376  |
| 155 | 6 | 0 | -0.655964 | -7.337077 | 8.432136  |
| 156 | 1 | 0 | -1.175587 | -7.850986 | 7.616110  |
| 157 | 1 | 0 | 0.417629  | -7.516124 | 8.288883  |
| 158 | 6 | 0 | -1.101906 | -7.874050 | 9.792615  |
| 159 | 1 | 0 | -2.189863 | -7.758593 | 9.891721  |
| 160 | 1 | 0 | -0.889266 | -8.946181 | 9.859779  |
| 161 | 6 | 0 | -0.410758 | -7.116576 | 10.927753 |
| 162 | 1 | 0 | 0.669938  | -7.308940 | 10.884271 |
| 163 | 1 | 0 | -0.758687 | -7.479346 | 11.900667 |
| 164 | 6 | 0 | -0.664088 | -5.613464 | 10.809198 |
| 165 | 1 | 0 | -1.734807 | -5.400222 | 10.924256 |
| 166 | 1 | 0 | -0.143208 | -5.062246 | 11.599656 |
| 167 | 6 | 0 | -1.202312 | -4.872700 | 6.206633  |
| 168 | 1 | 0 | -2.278557 | -4.790720 | 6.424519  |
| 169 | 7 | 0 | 3.607444  | 3.113335  | -1.934157 |
| 170 | 7 | 0 | 4.683887  | 0.458162  | -1.644991 |
| 171 | 7 | 0 | 4.452751  | -3.014278 | -7.041404 |
| 172 | 7 | 0 | 2.899305  | -2.307627 | -9.361995 |
| 173 | 6 | 0 | 1.735808  | 3.941780  | -3.975839 |
| 174 | 1 | 0 | 2.792347  | 3.951006  | -4.231811 |
| 175 | 6 | 0 | 1.356339  | 3.464429  | -2.713801 |
| 176 | 6 | 0 | 2.359703  | 3.035640  | -1.718144 |
| 177 | 1 | 0 | 1.956211  | 2.705397  | -0.748121 |
| 178 | 6 | 0 | 4.491188  | 2.736415  | -0.845700 |
| 179 | 1 | 0 | 3.929026  | 2.315758  | 0.001989  |

|     |   |   |           |           |            |
|-----|---|---|-----------|-----------|------------|
| 180 | 6 | 0 | 5.458290  | 1.647118  | -1.334371  |
| 181 | 1 | 0 | 5.974372  | 2.037114  | -2.229988  |
| 182 | 6 | 0 | 6.489252  | 1.312225  | -0.251275  |
| 183 | 1 | 0 | 7.186888  | 0.564341  | -0.645758  |
| 184 | 1 | 0 | 5.963668  | 0.845608  | 0.593372   |
| 185 | 6 | 0 | 7.236905  | 2.555532  | 0.230609   |
| 186 | 1 | 0 | 7.946636  | 2.279075  | 1.017286   |
| 187 | 1 | 0 | 7.824693  | 2.976023  | -0.597185  |
| 188 | 6 | 0 | 6.252603  | 3.609942  | 0.737287   |
| 189 | 1 | 0 | 6.785172  | 4.506778  | 1.071345   |
| 190 | 1 | 0 | 5.712476  | 3.213297  | 1.609030   |
| 191 | 6 | 0 | 5.247475  | 3.973742  | -0.355174  |
| 192 | 1 | 0 | 5.760978  | 4.435194  | -1.209320  |
| 193 | 1 | 0 | 4.512600  | 4.695479  | 0.015854   |
| 194 | 6 | 0 | 4.649211  | 0.066097  | -2.851104  |
| 195 | 1 | 0 | 5.206598  | 0.582021  | -3.647525  |
| 196 | 6 | 0 | 3.883918  | -1.128427 | -3.262098  |
| 197 | 6 | 0 | 2.979743  | -1.727931 | -2.375474  |
| 198 | 1 | 0 | 2.810960  | -1.257572 | -1.411033  |
| 199 | 6 | 0 | 2.322114  | -2.906839 | -2.713801  |
| 200 | 6 | 0 | 2.545778  | -3.474144 | -3.975839  |
| 201 | 1 | 0 | 2.025498  | -4.393746 | -4.231811  |
| 202 | 6 | 0 | 3.406444  | -2.867201 | -4.879188  |
| 203 | 6 | 0 | 4.084831  | -1.694712 | -4.514589  |
| 204 | 1 | 0 | 4.773888  | -1.250764 | -5.228371  |
| 205 | 6 | 0 | 3.618726  | -3.477583 | -6.206633  |
| 206 | 1 | 0 | 3.009607  | -4.368648 | -6.424519  |
| 207 | 6 | 0 | 4.594411  | -3.703353 | -8.308865  |
| 208 | 1 | 0 | 3.881609  | -4.543458 | -8.394376  |
| 209 | 6 | 0 | 4.286859  | -2.719292 | -9.448494  |
| 210 | 1 | 0 | 4.971223  | -1.859258 | -9.333994  |
| 211 | 6 | 0 | 4.529358  | -3.381849 | -10.809198 |
| 212 | 1 | 0 | 4.312430  | -2.655145 | -11.599656 |
| 213 | 1 | 0 | 3.809326  | -4.202498 | -10.924256 |
| 214 | 6 | 0 | 5.957757  | -3.914015 | -10.927753 |
| 215 | 1 | 0 | 6.664697  | -3.074287 | -10.884271 |
| 216 | 1 | 0 | 6.097960  | -4.396715 | -11.900667 |
| 217 | 6 | 0 | 6.268174  | -4.891304 | -9.792615  |
| 218 | 1 | 0 | 5.624207  | -5.775773 | -9.891721  |
| 219 | 1 | 0 | 7.302987  | -5.243218 | -9.859779  |
| 220 | 6 | 0 | 6.026113  | -4.236620 | -8.432136  |
| 221 | 1 | 0 | 6.717969  | -3.396385 | -8.288883  |
| 222 | 1 | 0 | 6.211360  | -4.943581 | -7.616110  |
| 223 | 6 | 0 | 2.659639  | -1.069240 | -9.236901  |
| 224 | 1 | 0 | 3.467601  | -0.322177 | -9.179005  |
| 225 | 7 | 0 | -2.738724 | 3.827284  | -1.644991  |
| 226 | 7 | 0 | -4.499949 | 1.567470  | -1.934157  |
| 227 | 7 | 0 | -1.945163 | -4.285446 | -1.644991  |
| 228 | 7 | 0 | 0.892505  | -4.680805 | -1.934157  |
| 229 | 6 | 0 | 0.006561  | 3.444499  | -2.375474  |
| 230 | 1 | 0 | -0.316391 | 3.063149  | -1.411033  |
| 231 | 6 | 0 | -0.964713 | 3.927785  | -3.262098  |
| 232 | 6 | 0 | -2.381847 | 3.993286  | -2.851104  |
| 233 | 1 | 0 | -3.107344 | 4.218036  | -3.647525  |
| 234 | 6 | 0 | -4.155591 | 3.903459  | -1.334371  |
| 235 | 1 | 0 | -4.751379 | 4.155401  | -2.229988  |
| 236 | 6 | 0 | -4.615399 | 2.521276  | -0.845700  |
| 237 | 1 | 0 | -3.970018 | 2.244757  | 0.001989   |
| 238 | 6 | 0 | -6.065099 | 2.557576  | -0.355174  |

|     |   |   |           |           |            |
|-----|---|---|-----------|-----------|------------|
| 239 | 1 | 0 | -6.322704 | 1.560287  | 0.015854   |
| 240 | 1 | 0 | -6.721480 | 2.771556  | -1.209320  |
| 241 | 6 | 0 | -6.252603 | 3.609942  | 0.737287   |
| 242 | 1 | 0 | -7.295570 | 3.622742  | 1.071345   |
| 243 | 1 | 0 | -5.639035 | 3.340501  | 1.609030   |
| 244 | 6 | 0 | -5.831608 | 4.989577  | 0.230609   |
| 245 | 1 | 0 | -5.947055 | 5.742451  | 1.017286   |
| 246 | 1 | 0 | -6.489658 | 5.288371  | -0.597185  |
| 247 | 6 | 0 | -4.381046 | 4.963745  | -0.251275  |
| 248 | 1 | 0 | -3.714152 | 4.741884  | 0.593372   |
| 249 | 1 | 0 | -4.082178 | 5.941857  | -0.645758  |
| 250 | 6 | 0 | -3.808793 | 0.525743  | -1.718144  |
| 251 | 1 | 0 | -3.321048 | 0.341430  | -0.748121  |
| 252 | 6 | 0 | -3.678453 | -0.557590 | -2.713801  |
| 253 | 6 | 0 | -4.281586 | -0.467636 | -3.975839  |
| 254 | 1 | 0 | -4.817845 | 0.442740  | -4.231811  |
| 255 | 6 | 0 | -4.186291 | -1.516467 | -4.879188  |
| 256 | 6 | 0 | -3.510079 | -2.690212 | -4.514589  |
| 257 | 1 | 0 | -3.470137 | -3.508926 | -5.228371  |
| 258 | 6 | 0 | -2.919205 | -2.799358 | -3.262098  |
| 259 | 6 | 0 | -2.986304 | -1.716568 | -2.375474  |
| 260 | 1 | 0 | -2.494569 | -1.805577 | -1.411033  |
| 261 | 6 | 0 | -2.267364 | -4.059383 | -2.851104  |
| 262 | 1 | 0 | -2.099254 | -4.800057 | -3.647525  |
| 263 | 6 | 0 | -1.302699 | -5.550577 | -1.334371  |
| 264 | 1 | 0 | -1.222993 | -6.192515 | -2.229988  |
| 265 | 6 | 0 | 0.124211  | -5.257691 | -0.845700  |
| 266 | 1 | 0 | 0.040992  | -4.560515 | 0.001989   |
| 267 | 6 | 0 | 0.817624  | -6.531318 | -0.355174  |
| 268 | 1 | 0 | 1.810104  | -6.255766 | 0.015854   |
| 269 | 1 | 0 | 0.960502  | -7.206750 | -1.209320  |
| 270 | 6 | 0 | -0.000000 | -7.219884 | 0.737287   |
| 271 | 1 | 0 | -0.073441 | -6.553798 | 1.609030   |
| 272 | 1 | 0 | 0.510398  | -8.129520 | 1.071345   |
| 273 | 6 | 0 | -1.405297 | -7.545109 | 0.230609   |
| 274 | 1 | 0 | -1.335035 | -8.264394 | -0.597185  |
| 275 | 1 | 0 | -1.999581 | -8.021526 | 1.017286   |
| 276 | 6 | 0 | -2.108206 | -6.275970 | -0.251275  |
| 277 | 1 | 0 | -2.249516 | -5.587492 | 0.593372   |
| 278 | 1 | 0 | -3.104710 | -6.506198 | -0.645758  |
| 279 | 6 | 0 | 1.449090  | -3.561383 | -1.718144  |
| 280 | 1 | 0 | 1.364837  | -3.046827 | -0.748121  |
| 281 | 7 | 0 | 0.384066  | 5.363334  | -7.041404  |
| 282 | 7 | 0 | 0.548811  | 3.664685  | -9.361995  |
| 283 | 7 | 0 | -3.448116 | -1.357058 | -9.361995  |
| 284 | 7 | 0 | -4.836817 | -2.349056 | -7.041404  |
| 285 | 6 | 0 | -0.574752 | 4.384924  | -4.514589  |
| 286 | 1 | 0 | -1.303751 | 4.759690  | -5.228371  |
| 287 | 6 | 0 | 0.779847  | 4.383668  | -4.879188  |
| 288 | 6 | 0 | 1.202312  | 4.872700  | -6.206633  |
| 289 | 1 | 0 | 2.278557  | 4.790720  | -6.424519  |
| 290 | 6 | 0 | 0.909992  | 5.830553  | -8.308865  |
| 291 | 1 | 0 | 1.993946  | 5.633301  | -8.394376  |
| 292 | 6 | 0 | 0.211546  | 5.072175  | -9.448494  |
| 293 | 1 | 0 | -0.875447 | 5.234835  | -9.333994  |
| 294 | 6 | 0 | 0.664088  | 5.613464  | -10.809198 |
| 295 | 1 | 0 | 0.143208  | 5.062246  | -11.599656 |
| 296 | 1 | 0 | 1.734807  | 5.400222  | -10.924256 |
| 297 | 6 | 0 | 0.410758  | 7.116576  | -10.927753 |

|     |    |   |           |           |            |
|-----|----|---|-----------|-----------|------------|
| 298 | 1  | 0 | 0.758687  | 7.479346  | -11.900667 |
| 299 | 1  | 0 | -0.669938 | 7.308940  | -10.884271 |
| 300 | 6  | 0 | 1.101906  | 7.874050  | -9.792615  |
| 301 | 1  | 0 | 0.889266  | 8.946181  | -9.859779  |
| 302 | 1  | 0 | 2.189863  | 7.758593  | -9.891721  |
| 303 | 6  | 0 | 0.655964  | 7.337077  | -8.432136  |
| 304 | 1  | 0 | -0.417629 | 7.516124  | -8.288883  |
| 305 | 1  | 0 | 1.175587  | 7.850986  | -7.616110  |
| 306 | 6  | 0 | -0.403831 | 2.837935  | -9.236901  |
| 307 | 1  | 0 | -1.454787 | 3.164119  | -9.179005  |
| 308 | 6  | 0 | -0.214665 | 1.382304  | -9.178365  |
| 309 | 6  | 0 | 1.086914  | 0.848146  | -9.185449  |
| 310 | 1  | 0 | 1.929640  | 1.535515  | -9.203014  |
| 311 | 6  | 0 | 1.304443  | -0.505247 | -9.178365  |
| 312 | 6  | 0 | 0.191059  | -1.365368 | -9.185449  |
| 313 | 1  | 0 | 0.364975  | -2.438875 | -9.203014  |
| 314 | 6  | 0 | -1.089778 | -0.877057 | -9.178365  |
| 315 | 6  | 0 | -1.277973 | 0.517222  | -9.185449  |
| 316 | 1  | 0 | -2.294615 | 0.903360  | -9.203014  |
| 317 | 6  | 0 | -2.255808 | -1.768695 | -9.236901  |
| 318 | 1  | 0 | -2.012814 | -2.841942 | -9.179005  |
| 319 | 6  | 0 | -4.498405 | -2.352883 | -9.448494  |
| 320 | 1  | 0 | -4.095776 | -3.375577 | -9.333994  |
| 321 | 6  | 0 | -5.504403 | -2.127200 | -8.308865  |
| 322 | 1  | 0 | -5.875555 | -1.089843 | -8.394376  |
| 323 | 6  | 0 | -6.682077 | -3.100457 | -8.432136  |
| 324 | 1  | 0 | -7.386947 | -2.907405 | -7.616110  |
| 325 | 1  | 0 | -6.300340 | -4.119739 | -8.288883  |
| 326 | 6  | 0 | -7.370080 | -2.982746 | -9.792615  |
| 327 | 1  | 0 | -7.814070 | -1.982820 | -9.891721  |
| 328 | 1  | 0 | -8.192253 | -3.702963 | -9.859779  |
| 329 | 6  | 0 | -6.368515 | -3.202561 | -10.927753 |
| 330 | 1  | 0 | -5.994759 | -4.234653 | -10.884271 |
| 331 | 1  | 0 | -6.856647 | -3.082631 | -11.900667 |
| 332 | 6  | 0 | -5.193446 | -2.231615 | -10.809198 |
| 333 | 1  | 0 | -5.544133 | -1.197724 | -10.924256 |
| 334 | 1  | 0 | -4.455638 | -2.407101 | -11.599656 |
| 335 | 6  | 0 | -4.821038 | -1.395117 | -6.206633  |
| 336 | 1  | 0 | -5.288164 | -0.422072 | -6.424519  |
| 337 | 54 | 0 | 0.000000  | 0.000000  | 0.000000   |

Diphenlyether C2 cc3-dpe

Standard orientation:

| Center<br>Number | Atomic<br>Number | Atomic<br>Type | Coordinates (Angstroms) |          |           |
|------------------|------------------|----------------|-------------------------|----------|-----------|
|                  |                  |                | X                       | Y        | Z         |
| 1                | 8                | 0              | -0.000000               | 0.000000 | 1.212603  |
| 2                | 6                | 0              | -0.000000               | 1.188815 | 0.520383  |
| 3                | 6                | 0              | 0.752620                | 1.376910 | -0.638128 |
| 4                | 6                | 0              | -0.734914               | 2.235076 | 1.070312  |
| 5                | 6                | 0              | 0.754375                | 2.627026 | -1.249138 |
| 6                | 1                | 0              | 1.326449                | 0.552418 | -1.048686 |
| 7                | 6                | 0              | -0.717076               | 3.481834 | 0.453310  |
| 8                | 1                | 0              | -1.304962               | 2.052531 | 1.974904  |
| 9                | 6                | 0              | 0.022684                | 3.682598 | -0.709602 |
| 10               | 1                | 0              | 1.340121                | 2.776038 | -2.150990 |
| 11               | 1                | 0              | -1.289571               | 4.298181 | 0.882627  |

|    |   |   |           |           |           |
|----|---|---|-----------|-----------|-----------|
| 12 | 1 | 0 | 0.030854  | 4.654853  | -1.191085 |
| 13 | 6 | 0 | -0.000000 | -1.188815 | 0.520383  |
| 14 | 6 | 0 | -0.752620 | -1.376910 | -0.638128 |
| 15 | 6 | 0 | 0.734914  | -2.235076 | 1.070312  |
| 16 | 6 | 0 | -0.754375 | -2.627026 | -1.249138 |
| 17 | 1 | 0 | -1.326449 | -0.552418 | -1.048686 |
| 18 | 6 | 0 | 0.717076  | -3.481834 | 0.453310  |
| 19 | 1 | 0 | 1.304962  | -2.052531 | 1.974904  |
| 20 | 6 | 0 | -0.022684 | -3.682598 | -0.709602 |
| 21 | 1 | 0 | -1.340121 | -2.776038 | -2.150990 |
| 22 | 1 | 0 | 1.289571  | -4.298181 | 0.882627  |
| 23 | 1 | 0 | -0.030854 | -4.654853 | -1.191085 |

Dimesitylether C2 cc3-dpe2

Standard orientation:

| Center<br>Number | Atomic<br>Number | Atomic<br>Type | Coordinates (Angstroms) |           |           |
|------------------|------------------|----------------|-------------------------|-----------|-----------|
|                  |                  |                | X                       | Y         | Z         |
| 1                | 8                | 0              | 0.000000                | 0.000000  | 1.227059  |
| 2                | 6                | 0              | -1.166747               | 0.284286  | 0.541958  |
| 3                | 6                | 0              | -1.215619               | 1.193097  | -0.517870 |
| 4                | 6                | 0              | -2.317359               | -0.352505 | 1.024625  |
| 5                | 6                | 0              | -2.458679               | 1.409674  | -1.122444 |
| 6                | 6                | 0              | -3.529710               | -0.093078 | 0.396261  |
| 7                | 6                | 0              | -3.621391               | 0.779552  | -0.690909 |
| 8                | 1                | 0              | -2.511493               | 2.111016  | -1.952918 |
| 9                | 1                | 0              | -4.426751               | -0.589525 | 0.761926  |
| 10               | 6                | 0              | 1.166747                | -0.284286 | 0.541958  |
| 11               | 6                | 0              | 1.215619                | -1.193097 | -0.517870 |
| 12               | 6                | 0              | 2.317359                | 0.352505  | 1.024625  |
| 13               | 6                | 0              | 2.458679                | -1.409674 | -1.122444 |
| 14               | 6                | 0              | 3.529710                | 0.093078  | 0.396261  |
| 15               | 6                | 0              | 3.621391                | -0.779552 | -0.690909 |
| 16               | 1                | 0              | 2.511493                | -2.111016 | -1.952918 |
| 17               | 1                | 0              | 4.426751                | 0.589525  | 0.761926  |
| 18               | 6                | 0              | -4.949448               | 1.040887  | -1.355579 |
| 19               | 6                | 0              | -0.000000               | 1.940405  | -1.005758 |
| 20               | 6                | 0              | -2.210021               | -1.296108 | 2.191893  |
| 21               | 6                | 0              | 2.210021                | 1.296108  | 2.191893  |
| 22               | 6                | 0              | -0.000000               | -1.940405 | -1.005758 |
| 23               | 6                | 0              | 4.949448                | -1.040887 | -1.355579 |
| 24               | 1                | 0              | -0.309565               | 2.800677  | -1.604748 |
| 25               | 1                | 0              | 0.605297                | 2.305435  | -0.170903 |
| 26               | 1                | 0              | 0.651682                | 1.311320  | -1.622253 |
| 27               | 1                | 0              | -1.822958               | -0.783225 | 3.077662  |
| 28               | 1                | 0              | -3.185939               | -1.723053 | 2.434566  |
| 29               | 1                | 0              | -1.514732               | -2.115058 | 1.978027  |
| 30               | 1                | 0              | 3.185939                | 1.723053  | 2.434566  |
| 31               | 1                | 0              | 1.514732                | 2.115058  | 1.978027  |
| 32               | 1                | 0              | 1.822958                | 0.783225  | 3.077662  |
| 33               | 1                | 0              | -0.651682               | -1.311320 | -1.622253 |
| 34               | 1                | 0              | 0.309565                | -2.800677 | -1.604748 |
| 35               | 1                | 0              | -0.605297               | -2.305435 | -0.170903 |
| 36               | 1                | 0              | 4.834883                | -1.693280 | -2.225027 |
| 37               | 1                | 0              | 5.414047                | -0.108579 | -1.692691 |
| 38               | 1                | 0              | 5.649860                | -1.522461 | -0.664936 |
| 39               | 1                | 0              | -4.834883               | 1.693280  | -2.225027 |

|    |   |   |           |          |           |
|----|---|---|-----------|----------|-----------|
| 40 | 1 | 0 | -5.414047 | 0.108579 | -1.692691 |
| 41 | 1 | 0 | -5.649860 | 1.522461 | -0.664936 |

Octachloropropane C2v cc3-dpe4

Standard orientation:

| Center<br>Number | Atomic<br>Number | Atomic<br>Type | Coordinates (Angstroms) |           |           |
|------------------|------------------|----------------|-------------------------|-----------|-----------|
|                  |                  |                | X                       | Y         | Z         |
| 1                | 6                | 0              | 0.000000                | 1.387165  | -0.249343 |
| 2                | 6                | 0              | 0.000000                | 0.000000  | 0.557744  |
| 3                | 6                | 0              | -0.000000               | -1.387165 | -0.249343 |
| 4                | 17               | 0              | -1.457251               | 0.000000  | 1.579605  |
| 5                | 17               | 0              | 1.457251                | -0.000000 | 1.579605  |
| 6                | 17               | 0              | 0.000000                | 2.723316  | 0.938936  |
| 7                | 17               | 0              | -0.000000               | -2.723316 | 0.938936  |
| 8                | 17               | 0              | -1.441663               | 1.583295  | -1.264481 |
| 9                | 17               | 0              | 1.441663                | 1.583295  | -1.264481 |
| 10               | 17               | 0              | -1.441663               | -1.583295 | -1.264481 |
| 11               | 17               | 0              | 1.441663                | -1.583295 | -1.264481 |

Hexachloropropene Cs cc3-dpe6

Standard orientation:

| Center<br>Number | Atomic<br>Number | Atomic<br>Type | Coordinates (Angstroms) |           |           |
|------------------|------------------|----------------|-------------------------|-----------|-----------|
|                  |                  |                | X                       | Y         | Z         |
| 1                | 6                | 0              | 1.345643                | -0.498115 | 0.000000  |
| 2                | 6                | 0              | 0.006418                | -0.619332 | 0.000000  |
| 3                | 6                | 0              | -0.951655               | 0.582384  | -0.000000 |
| 4                | 17               | 0              | -0.684206               | -2.197645 | 0.000000  |
| 5                | 17               | 0              | -2.660504               | 0.094505  | -0.000000 |
| 6                | 17               | 0              | 2.392933                | -1.861747 | 0.000000  |
| 7                | 17               | 0              | 2.178870                | 1.002484  | 0.000000  |
| 8                | 17               | 0              | -0.684206               | 1.575625  | 1.464751  |
| 9                | 17               | 0              | -0.684206               | 1.575625  | -1.464751 |

Benzylbenzoate C1 cc3-dpe8

Standard orientation:

| Center<br>Number | Atomic<br>Number | Atomic<br>Type | Coordinates (Angstroms) |           |           |
|------------------|------------------|----------------|-------------------------|-----------|-----------|
|                  |                  |                | X                       | Y         | Z         |
| 1                | 6                | 0              | 1.218485                | 1.321574  | 0.088452  |
| 2                | 1                | 0              | 1.161409                | 1.872856  | 1.033516  |
| 3                | 1                | 0              | 1.230302                | 2.059895  | -0.719608 |
| 4                | 6                | 0              | 2.427199                | 0.426772  | 0.037909  |
| 5                | 6                | 0              | 2.428900                | -0.803382 | 0.698624  |
| 6                | 6                | 0              | 3.574693                | 0.839404  | -0.637093 |
| 7                | 6                | 0              | 3.563838                | -1.606926 | 0.682377  |
| 8                | 1                | 0              | 1.532138                | -1.129553 | 1.217186  |
| 9                | 6                | 0              | 4.715009                | 0.039603  | -0.646535 |
| 10               | 1                | 0              | 3.575643                | 1.791502  | -1.161933 |
| 11               | 6                | 0              | 4.711029                | -1.186093 | 0.012039  |
| 12               | 1                | 0              | 3.554373                | -2.563991 | 1.194966  |
| 13               | 1                | 0              | 5.602396                | 0.371211  | -1.176727 |

|    |   |   |           |           |           |
|----|---|---|-----------|-----------|-----------|
| 14 | 1 | 0 | 5.596560  | -1.813893 | 0.000607  |
| 15 | 8 | 0 | 0.048058  | 0.506790  | -0.031826 |
| 16 | 6 | 0 | -1.120952 | 1.155618  | 0.113109  |
| 17 | 8 | 0 | -1.194718 | 2.343841  | 0.319235  |
| 18 | 6 | 0 | -2.294004 | 0.244303  | -0.008780 |
| 19 | 6 | 0 | -2.147754 | -1.117979 | -0.277388 |
| 20 | 6 | 0 | -3.564342 | 0.798526  | 0.155358  |
| 21 | 6 | 0 | -3.277376 | -1.922899 | -0.379985 |
| 22 | 1 | 0 | -1.155048 | -1.534879 | -0.407574 |
| 23 | 6 | 0 | -4.689795 | -0.010059 | 0.053210  |
| 24 | 1 | 0 | -3.645229 | 1.860741  | 0.361882  |
| 25 | 6 | 0 | -4.545976 | -1.370571 | -0.214323 |
| 26 | 1 | 0 | -3.168716 | -2.982150 | -0.590109 |
| 27 | 1 | 0 | -5.678802 | 0.418100  | 0.181399  |
| 28 | 1 | 0 | -5.425460 | -2.002233 | -0.294715 |

Tetrachloroethene D2h cc3-dpe12

Standard orientation:

| Center<br>Number | Atomic<br>Number | Atomic<br>Type | Coordinates (Angstroms) |           |           |
|------------------|------------------|----------------|-------------------------|-----------|-----------|
|                  |                  |                | X                       | Y         | Z         |
| 1                | 6                | 0              | 0.000000                | -0.000000 | 0.669843  |
| 2                | 6                | 0              | 0.000000                | -0.000000 | -0.669843 |
| 3                | 17               | 0              | 0.000000                | 1.451545  | -1.588960 |
| 4                | 17               | 0              | -0.000000               | -1.451545 | -1.588960 |
| 5                | 17               | 0              | -0.000000               | -1.451545 | 1.588960  |
| 6                | 17               | 0              | -0.000000               | 1.451545  | 1.588960  |

Mesitylene C3v cc3-mes2

Standard orientation:

| Center<br>Number | Atomic<br>Number | Atomic<br>Type | Coordinates (Angstroms) |           |           |
|------------------|------------------|----------------|-------------------------|-----------|-----------|
|                  |                  |                | X                       | Y         | Z         |
| 1                | 6                | 0              | 1.199694                | 0.692644  | -0.011796 |
| 2                | 6                | 0              | 0.000000                | 1.404735  | -0.009247 |
| 3                | 6                | 0              | -1.199694               | 0.692644  | -0.011796 |
| 4                | 6                | 0              | -1.216536               | -0.702367 | -0.009247 |
| 5                | 6                | 0              | -0.000000               | -1.385288 | -0.011796 |
| 6                | 6                | 0              | 1.216536                | -0.702367 | -0.009247 |
| 7                | 1                | 0              | 2.142466                | 1.236954  | -0.024022 |
| 8                | 1                | 0              | -2.142466               | 1.236954  | -0.024022 |
| 9                | 1                | 0              | -0.000000               | -2.473907 | -0.024022 |
| 10               | 6                | 0              | -2.522562               | -1.456402 | 0.012907  |
| 11               | 1                | 0              | -2.848152               | -1.644382 | 1.042255  |
| 12               | 1                | 0              | -3.315643               | -0.890952 | -0.484710 |
| 13               | 1                | 0              | -2.429409               | -2.425955 | -0.484710 |
| 14               | 6                | 0              | 0.000000                | 2.912803  | 0.012907  |
| 15               | 1                | 0              | -0.886234               | 3.316907  | -0.484710 |
| 16               | 1                | 0              | 0.000000                | 3.288763  | 1.042255  |
| 17               | 1                | 0              | 0.886234                | 3.316907  | -0.484710 |
| 18               | 6                | 0              | 2.522562                | -1.456402 | 0.012907  |
| 19               | 1                | 0              | 3.315643                | -0.890952 | -0.484710 |
| 20               | 1                | 0              | 2.848152                | -1.644382 | 1.042255  |
| 21               | 1                | 0              | 2.429409                | -2.425955 | -0.484710 |



Standard orientation:

| Center<br>Number | Atomic<br>Number | Atomic<br>Type | Coordinates (Angstroms) |           |            |
|------------------|------------------|----------------|-------------------------|-----------|------------|
|                  |                  |                | X                       | Y         | Z          |
| 1                | 7                | 0              | -2.859179               | -4.664270 | 1.348146   |
| 2                | 7                | 0              | -4.711533               | -3.293610 | -0.414743  |
| 3                | 7                | 0              | -1.750660               | -0.496789 | -5.377959  |
| 4                | 7                | 0              | 1.115178                | -0.088588 | -5.505438  |
| 5                | 6                | 0              | -0.046630               | -4.057972 | 1.551717   |
| 6                | 1                | 0              | -0.359346               | -4.729388 | 0.756342   |
| 7                | 6                | 0              | -1.032151               | -3.463778 | 2.353356   |
| 8                | 6                | 0              | -2.463297               | -3.775679 | 2.160118   |
| 9                | 1                | 0              | -3.162051               | -3.210753 | 2.796149   |
| 10               | 6                | 0              | -4.280014               | -4.955218 | 1.306157   |
| 11               | 1                | 0              | -4.847643               | -4.297684 | 1.988905   |
| 12               | 6                | 0              | -4.810854               | -4.708194 | -0.114154  |
| 13               | 1                | 0              | -4.199190               | -5.315032 | -0.806172  |
| 14               | 6                | 0              | -6.278983               | -5.136469 | -0.222408  |
| 15               | 1                | 0              | -6.620682               | -4.964851 | -1.248877  |
| 16               | 1                | 0              | -6.874559               | -4.479828 | 0.425123   |
| 17               | 6                | 0              | -6.475930               | -6.596048 | 0.187314   |
| 18               | 1                | 0              | -7.535037               | -6.865163 | 0.115880   |
| 19               | 1                | 0              | -5.933920               | -7.248700 | -0.510614  |
| 20               | 6                | 0              | -5.954541               | -6.833491 | 1.605243   |
| 21               | 1                | 0              | -6.067286               | -7.885762 | 1.886779   |
| 22               | 1                | 0              | -6.555867               | -6.247960 | 2.313994   |
| 23               | 6                | 0              | -4.487883               | -6.417719 | 1.716844   |
| 24               | 1                | 0              | -3.867268               | -7.046727 | 1.065474   |
| 25               | 1                | 0              | -4.115796               | -6.553553 | 2.738185   |
| 26               | 6                | 0              | -3.996740               | -2.948705 | -1.403566  |
| 27               | 1                | 0              | -3.452063               | -3.686304 | -2.013647  |
| 28               | 6                | 0              | -3.848293               | -1.542670 | -1.823039  |
| 29               | 6                | 0              | -4.440377               | -0.504048 | -1.091258  |
| 30               | 1                | 0              | -5.015826               | -0.756310 | -0.203820  |
| 31               | 6                | 0              | -4.275748               | 0.816925  | -1.487672  |
| 32               | 6                | 0              | -3.519939               | 1.107005  | -2.632415  |
| 33               | 1                | 0              | -3.402445               | 2.146869  | -2.925986  |
| 34               | 6                | 0              | -2.941956               | 0.084479  | -3.372467  |
| 35               | 6                | 0              | -3.106380               | -1.244426 | -2.957992  |
| 36               | 1                | 0              | -2.639023               | -2.031985 | -3.543701  |
| 37               | 6                | 0              | -2.187771               | 0.403640  | -4.599996  |
| 38               | 1                | 0              | -2.048638               | 1.475348  | -4.811223  |
| 39               | 6                | 0              | -1.068133               | -0.078004 | -6.586033  |
| 40               | 1                | 0              | -0.967815               | 1.021350  | -6.636433  |
| 41               | 6                | 0              | 0.348571                | -0.671447 | -6.589358  |
| 42               | 1                | 0              | 0.247135                | -1.765592 | -6.471873  |
| 43               | 6                | 0              | 1.061185                | -0.365155 | -7.911909  |
| 44               | 1                | 0              | 2.059002                | -0.816555 | -7.887293  |
| 45               | 1                | 0              | 1.204878                | 0.721139  | -7.978487  |
| 46               | 6                | 0              | 0.260565                | -0.863259 | -9.114931  |
| 47               | 1                | 0              | 0.185194                | -1.958562 | -9.076463  |
| 48               | 1                | 0              | 0.785281                | -0.613532 | -10.043173 |
| 49               | 6                | 0              | -1.145818               | -0.262380 | -9.112948  |
| 50               | 1                | 0              | -1.073388               | 0.826237  | -9.241482  |
| 51               | 1                | 0              | -1.729459               | -0.643563 | -9.957575  |
| 52               | 6                | 0              | -1.863652               | -0.573346 | -7.799475  |

|     |   |   |           |           |           |
|-----|---|---|-----------|-----------|-----------|
| 53  | 1 | 0 | -2.005645 | -1.656932 | -7.695106 |
| 54  | 1 | 0 | -2.860112 | -0.118804 | -7.776923 |
| 55  | 6 | 0 | 1.594800  | -0.871062 | -4.630973 |
| 56  | 1 | 0 | 1.422422  | -1.958454 | -4.663370 |
| 57  | 7 | 0 | 0.269080  | -1.044200 | 5.597823  |
| 58  | 7 | 0 | 0.419393  | 1.811120  | 5.361040  |
| 59  | 7 | 0 | -3.382807 | 4.514298  | 0.972975  |
| 60  | 7 | 0 | -4.840263 | 3.115314  | -1.072739 |
| 61  | 6 | 0 | -0.654585 | -2.602306 | 3.377537  |
| 62  | 1 | 0 | -1.398515 | -2.131402 | 4.014730  |
| 63  | 6 | 0 | 0.700035  | -2.333003 | 3.619365  |
| 64  | 6 | 0 | 1.103434  | -1.457494 | 4.738476  |
| 65  | 1 | 0 | 2.173381  | -1.203752 | 4.790082  |
| 66  | 6 | 0 | 0.758290  | -0.205424 | 6.673299  |
| 67  | 1 | 0 | 1.842669  | -0.015668 | 6.578450  |
| 68  | 6 | 0 | 0.044450  | 1.153814  | 6.596931  |
| 69  | 1 | 0 | -1.042277 | 0.957529  | 6.639050  |
| 70  | 6 | 0 | 0.448410  | 2.039510  | 7.780420  |
| 71  | 1 | 0 | -0.085840 | 2.992898  | 7.706690  |
| 72  | 1 | 0 | 1.518598  | 2.266063  | 7.688667  |
| 73  | 6 | 0 | 0.168350  | 1.353339  | 9.117916  |
| 74  | 1 | 0 | 0.484855  | 1.999300  | 9.943567  |
| 75  | 1 | 0 | -0.913645 | 1.200297  | 9.230498  |
| 76  | 6 | 0 | 0.877494  | 0.000002  | 9.192391  |
| 77  | 1 | 0 | 0.647430  | -0.503808 | 10.137055 |
| 78  | 1 | 0 | 1.964128  | 0.160310  | 9.173832  |
| 79  | 6 | 0 | 0.474813  | -0.888777 | 8.015077  |
| 80  | 1 | 0 | -0.597849 | -1.116998 | 8.063583  |
| 81  | 1 | 0 | 1.005751  | -1.846505 | 8.044553  |
| 82  | 6 | 0 | -0.500115 | 2.086644  | 4.532254  |
| 83  | 1 | 0 | -1.554545 | 1.835285  | 4.726304  |
| 84  | 6 | 0 | -0.232662 | 2.799470  | 3.267944  |
| 85  | 6 | 0 | 1.080892  | 3.075820  | 2.865832  |
| 86  | 1 | 0 | 1.899636  | 2.722397  | 3.487372  |
| 87  | 6 | 0 | 1.325317  | 3.806552  | 1.709869  |
| 88  | 6 | 0 | 0.246302  | 4.262476  | 0.939167  |
| 89  | 1 | 0 | 0.455534  | 4.844234  | 0.045053  |
| 90  | 6 | 0 | -1.060378 | 3.996831  | 1.330761  |
| 91  | 6 | 0 | -1.294762 | 3.254541  | 2.496517  |
| 92  | 1 | 0 | -2.323417 | 3.065479  | 2.792759  |
| 93  | 6 | 0 | -2.186039 | 4.556819  | 0.555895  |
| 94  | 1 | 0 | -1.916364 | 5.046726  | -0.392667 |
| 95  | 6 | 0 | -4.404090 | 5.153953  | 0.166514  |
| 96  | 1 | 0 | -3.982681 | 5.563023  | -0.769597 |
| 97  | 6 | 0 | -5.463370 | 4.112206  | -0.226678 |
| 98  | 1 | 0 | -5.854259 | 3.666700  | 0.706155  |
| 99  | 6 | 0 | -6.611814 | 4.777164  | -0.992910 |
| 100 | 1 | 0 | -7.355137 | 4.013999  | -1.248111 |
| 101 | 1 | 0 | -6.213343 | 5.163354  | -1.940148 |
| 102 | 6 | 0 | -7.243211 | 5.912088  | -0.185796 |
| 103 | 1 | 0 | -7.703327 | 5.501151  | 0.723194  |
| 104 | 1 | 0 | -8.046487 | 6.380984  | -0.763849 |
| 105 | 6 | 0 | -6.189432 | 6.948247  | 0.209047  |
| 106 | 1 | 0 | -5.795841 | 7.426273  | -0.698361 |
| 107 | 1 | 0 | -6.638223 | 7.741491  | 0.816215  |
| 108 | 6 | 0 | -5.041368 | 6.289856  | 0.974817  |
| 109 | 1 | 0 | -5.408540 | 5.873013  | 1.921701  |
| 110 | 1 | 0 | -4.266386 | 7.021278  | 1.228629  |
| 111 | 6 | 0 | -4.883607 | 1.905025  | -0.698205 |

|     |   |   |           |           |           |
|-----|---|---|-----------|-----------|-----------|
| 112 | 1 | 0 | -5.378609 | 1.600933  | 0.237614  |
| 113 | 7 | 0 | 3.565977  | -4.340037 | 1.203255  |
| 114 | 7 | 0 | 4.684312  | -3.120555 | -1.142590 |
| 115 | 7 | 0 | 4.643344  | 3.312989  | -1.349088 |
| 116 | 7 | 0 | 3.007056  | 4.916277  | 0.388513  |
| 117 | 6 | 0 | 1.669673  | -2.922175 | 2.814704  |
| 118 | 1 | 0 | 2.727128  | -2.731964 | 2.979269  |
| 119 | 6 | 0 | 1.300129  | -3.791097 | 1.777130  |
| 120 | 6 | 0 | 2.330359  | -4.438195 | 0.939046  |
| 121 | 1 | 0 | 1.956596  | -5.021374 | 0.083563  |
| 122 | 6 | 0 | 4.502997  | -5.033014 | 0.341637  |
| 123 | 1 | 0 | 3.984648  | -5.552259 | -0.484498 |
| 124 | 6 | 0 | 5.453750  | -4.003329 | -0.289433 |
| 125 | 1 | 0 | 5.939468  | -3.450278 | 0.534967  |
| 126 | 6 | 0 | 6.525251  | -4.709245 | -1.128014 |
| 127 | 1 | 0 | 7.194790  | -3.953957 | -1.553681 |
| 128 | 1 | 0 | 6.028236  | -5.206211 | -1.971268 |
| 129 | 6 | 0 | 7.304758  | -5.731020 | -0.299339 |
| 130 | 1 | 0 | 8.048275  | -6.232971 | -0.927327 |
| 131 | 1 | 0 | 7.857955  | -5.210959 | 0.494592  |
| 132 | 6 | 0 | 6.358554  | -6.752684 | 0.334005  |
| 133 | 1 | 0 | 6.916849  | -7.461115 | 0.954931  |
| 134 | 1 | 0 | 5.875260  | -7.337790 | -0.460235 |
| 135 | 6 | 0 | 5.288004  | -6.053408 | 1.172377  |
| 136 | 1 | 0 | 5.753044  | -5.525042 | 2.014783  |
| 137 | 1 | 0 | 4.586228  | -6.778094 | 1.599384  |
| 138 | 6 | 0 | 4.733473  | -1.875014 | -0.909554 |
| 139 | 1 | 0 | 5.334670  | -1.459061 | -0.085825 |
| 140 | 6 | 0 | 4.008054  | -0.891407 | -1.736734 |
| 141 | 6 | 0 | 3.117575  | -1.317971 | -2.730990 |
| 142 | 1 | 0 | 2.964243  | -2.385471 | -2.866899 |
| 143 | 6 | 0 | 2.463048  | -0.394336 | -3.536403 |
| 144 | 6 | 0 | 2.684263  | 0.974211  | -3.335686 |
| 145 | 1 | 0 | 2.166595  | 1.683699  | -3.976103 |
| 146 | 6 | 0 | 3.558850  | 1.409123  | -2.346940 |
| 147 | 6 | 0 | 4.223532  | 0.468201  | -1.547590 |
| 148 | 1 | 0 | 4.909444  | 0.826700  | -0.784118 |
| 149 | 6 | 0 | 3.788547  | 2.855563  | -2.166188 |
| 150 | 1 | 0 | 3.173775  | 3.516787  | -2.796485 |
| 151 | 6 | 0 | 4.788573  | 4.752522  | -1.262548 |
| 152 | 1 | 0 | 4.110230  | 5.270813  | -1.964303 |
| 153 | 6 | 0 | 4.409508  | 5.203187  | 0.157586  |
| 154 | 1 | 0 | 5.056672  | 4.649769  | 0.862028  |
| 155 | 6 | 0 | 4.646986  | 6.707837  | 0.324977  |
| 156 | 1 | 0 | 4.380871  | 6.996279  | 1.347702  |
| 157 | 1 | 0 | 3.959476  | 7.239762  | -0.345437 |
| 158 | 6 | 0 | 6.093168  | 7.087201  | 0.004984  |
| 159 | 1 | 0 | 6.765164  | 6.607270  | 0.729532  |
| 160 | 1 | 0 | 6.229576  | 8.168324  | 0.113801  |
| 161 | 6 | 0 | 6.472677  | 6.636727  | -1.406863 |
| 162 | 1 | 0 | 5.863735  | 7.187148  | -2.136974 |
| 163 | 1 | 0 | 7.519156  | 6.879085  | -1.619940 |
| 164 | 6 | 0 | 6.237995  | 5.135522  | -1.578439 |
| 165 | 1 | 0 | 6.895855  | 4.571046  | -0.904843 |
| 166 | 1 | 0 | 6.475130  | 4.813416  | -2.598199 |
| 167 | 6 | 0 | 2.716933  | 4.133015  | 1.342531  |
| 168 | 1 | 0 | 3.493846  | 3.671922  | 1.972406  |
| 169 | 6 | 0 | -0.023654 | -0.829852 | 0.279392  |
| 170 | 1 | 0 | 0.342955  | -1.431543 | 1.106459  |

|     |    |   |           |           |           |
|-----|----|---|-----------|-----------|-----------|
| 171 | 17 | 0 | -1.621966 | -0.210060 | 0.723220  |
| 172 | 17 | 0 | 1.120759  | 0.491586  | 0.008268  |
| 173 | 17 | 0 | -0.125207 | -1.883013 | -1.146826 |

Diphenlyether@CC3 C2 cc3-dpel

Standard orientation:

| Center<br>Number | Atomic<br>Number | Atomic<br>Type | Coordinates (Angstroms) |           |            |
|------------------|------------------|----------------|-------------------------|-----------|------------|
|                  |                  |                | X                       | Y         | Z          |
| 1                | 7                | 0              | 1.148652                | 0.876300  | -5.989323  |
| 2                | 7                | 0              | -1.148652               | -0.876300 | -5.989323  |
| 3                | 7                | 0              | -5.628171               | 0.343791  | -1.462511  |
| 4                | 7                | 0              | -5.401985               | 1.975425  | 0.967614   |
| 5                | 6                | 0              | 1.954706                | 2.359209  | -3.668177  |
| 6                | 1                | 0              | 1.099175                | 2.719820  | -4.233413  |
| 7                | 6                | 0              | 2.542717                | 1.145808  | -4.049093  |
| 8                | 6                | 0              | 2.034706                | 0.400003  | -5.217718  |
| 9                | 1                | 0              | 2.491365                | -0.586901 | -5.392470  |
| 10               | 6                | 0              | 0.762184                | 0.090935  | -7.144988  |
| 11               | 1                | 0              | 1.217105                | -0.915878 | -7.120962  |
| 12               | 6                | 0              | -0.762184               | -0.090935 | -7.144988  |
| 13               | 1                | 0              | -1.217105               | 0.915878  | -7.120962  |
| 14               | 6                | 0              | -1.216134               | -0.821643 | -8.414406  |
| 15               | 1                | 0              | -2.306596               | -0.924249 | -8.391249  |
| 16               | 1                | 0              | -0.800026               | -1.837336 | -8.392931  |
| 17               | 6                | 0              | -0.759176               | -0.092243 | -9.678008  |
| 18               | 1                | 0              | -1.079719               | -0.646193 | -10.566610 |
| 19               | 1                | 0              | -1.242439               | 0.893119  | -9.725579  |
| 20               | 6                | 0              | 0.759176                | 0.092243  | -9.678008  |
| 21               | 1                | 0              | 1.079719                | 0.646193  | -10.566610 |
| 22               | 1                | 0              | 1.242439                | -0.893119 | -9.725579  |
| 23               | 6                | 0              | 1.216134                | 0.821643  | -8.414406  |
| 24               | 1                | 0              | 0.800026                | 1.837336  | -8.392931  |
| 25               | 1                | 0              | 2.306596                | 0.924249  | -8.391249  |
| 26               | 6                | 0              | -2.034706               | -0.400003 | -5.217718  |
| 27               | 1                | 0              | -2.491365               | 0.586901  | -5.392470  |
| 28               | 6                | 0              | -2.542717               | -1.145808 | -4.049093  |
| 29               | 6                | 0              | -1.954706               | -2.359209 | -3.668177  |
| 30               | 1                | 0              | -1.099175               | -2.719820 | -4.233413  |
| 31               | 6                | 0              | -2.459537               | -3.083918 | -2.595125  |
| 32               | 6                | 0              | -3.583464               | -2.605336 | -1.908680  |
| 33               | 1                | 0              | -3.968551               | -3.184937 | -1.073436  |
| 34               | 6                | 0              | -4.168260               | -1.397010 | -2.271743  |
| 35               | 6                | 0              | -3.635003               | -0.660694 | -3.337657  |
| 36               | 1                | 0              | -4.099538               | 0.285764  | -3.603323  |
| 37               | 6                | 0              | -5.311832               | -0.884632 | -1.490128  |
| 38               | 1                | 0              | -5.851906               | -1.637010 | -0.892567  |
| 39               | 6                | 0              | -6.772846               | 0.713572  | -0.642291  |
| 40               | 1                | 0              | -6.951231               | -0.037123 | 0.148663   |
| 41               | 6                | 0              | -6.516013               | 2.066433  | 0.038019   |
| 42               | 1                | 0              | -6.306534               | 2.796706  | -0.765040  |
| 43               | 6                | 0              | -7.758821               | 2.519749  | 0.814639   |
| 44               | 1                | 0              | -7.547200               | 3.489666  | 1.277553   |
| 45               | 1                | 0              | -7.930993               | 1.808101  | 1.632802   |
| 46               | 6                | 0              | -8.992766               | 2.598410  | -0.083864  |
| 47               | 1                | 0              | -8.837407               | 3.369194  | -0.851001  |
| 48               | 1                | 0              | -9.865266               | 2.905357  | 0.502449   |

|     |   |   |            |           |           |
|-----|---|---|------------|-----------|-----------|
| 49  | 6 | 0 | -9.250022  | 1.254558  | -0.766167 |
| 50  | 1 | 0 | -9.500134  | 0.504482  | -0.003602 |
| 51  | 1 | 0 | -10.110424 | 1.321589  | -1.440391 |
| 52  | 6 | 0 | -8.015009  | 0.795749  | -1.541150 |
| 53  | 1 | 0 | -7.800773  | 1.495927  | -2.359605 |
| 54  | 1 | 0 | -8.181046  | -0.186289 | -1.998449 |
| 55  | 6 | 0 | -4.454092  | 2.803980  | 0.805316  |
| 56  | 1 | 0 | -4.457431  | 3.518833  | -0.033497 |
| 57  | 7 | 0 | 5.628171   | -0.343791 | -1.462511 |
| 58  | 7 | 0 | 5.401985   | -1.975425 | 0.967614  |
| 59  | 7 | 0 | -0.000000  | -5.467889 | 0.659448  |
| 60  | 7 | 0 | -2.233029  | -5.054482 | -1.232300 |
| 61  | 6 | 0 | 3.635003   | 0.660694  | -3.337657 |
| 62  | 1 | 0 | 4.099538   | -0.285764 | -3.603323 |
| 63  | 6 | 0 | 4.168260   | 1.397010  | -2.271743 |
| 64  | 6 | 0 | 5.311832   | 0.884632  | -1.490128 |
| 65  | 1 | 0 | 5.851906   | 1.637010  | -0.892567 |
| 66  | 6 | 0 | 6.772846   | -0.713572 | -0.642291 |
| 67  | 1 | 0 | 6.951231   | 0.037123  | 0.148663  |
| 68  | 6 | 0 | 6.516013   | -2.066433 | 0.038019  |
| 69  | 1 | 0 | 6.306534   | -2.796706 | -0.765040 |
| 70  | 6 | 0 | 7.758821   | -2.519749 | 0.814639  |
| 71  | 1 | 0 | 7.547200   | -3.489666 | 1.277553  |
| 72  | 1 | 0 | 7.930993   | -1.808101 | 1.632802  |
| 73  | 6 | 0 | 8.992766   | -2.598410 | -0.083864 |
| 74  | 1 | 0 | 9.865266   | -2.905357 | 0.502449  |
| 75  | 1 | 0 | 8.837407   | -3.369194 | -0.851001 |
| 76  | 6 | 0 | 9.250022   | -1.254558 | -0.766167 |
| 77  | 1 | 0 | 10.110424  | -1.321589 | -1.440391 |
| 78  | 1 | 0 | 9.500134   | -0.504482 | -0.003602 |
| 79  | 6 | 0 | 8.015009   | -0.795749 | -1.541150 |
| 80  | 1 | 0 | 7.800773   | -1.495927 | -2.359605 |
| 81  | 1 | 0 | 8.181046   | 0.186289  | -1.998449 |
| 82  | 6 | 0 | 4.454092   | -2.803980 | 0.805316  |
| 83  | 1 | 0 | 4.457431   | -3.518833 | -0.033497 |
| 84  | 6 | 0 | 3.269046   | -2.893061 | 1.682534  |
| 85  | 6 | 0 | 3.155932   | -2.150176 | 2.868815  |
| 86  | 1 | 0 | 3.968652   | -1.482616 | 3.147156  |
| 87  | 6 | 0 | 1.995078   | -2.222137 | 3.633575  |
| 88  | 6 | 0 | 0.946361   | -3.052912 | 3.216836  |
| 89  | 1 | 0 | 0.048511   | -3.099036 | 3.825997  |
| 90  | 6 | 0 | 1.048100   | -3.798409 | 2.048970  |
| 91  | 6 | 0 | 2.220269   | -3.716222 | 1.285483  |
| 92  | 1 | 0 | 2.287285   | -4.303742 | 0.373105  |
| 93  | 6 | 0 | -0.061898  | -4.692155 | 1.661178  |
| 94  | 1 | 0 | -0.942086  | -4.664213 | 2.322938  |
| 95  | 6 | 0 | -1.096277  | -6.399864 | 0.461513  |
| 96  | 1 | 0 | -1.953212  | -6.164064 | 1.117738  |
| 97  | 6 | 0 | -1.591938  | -6.333233 | -0.989872 |
| 98  | 1 | 0 | -0.715886  | -6.479955 | -1.647212 |
| 99  | 6 | 0 | -2.625177  | -7.434611 | -1.264967 |
| 100 | 1 | 0 | -2.935560  | -7.367941 | -2.313540 |
| 101 | 1 | 0 | -3.514714  | -7.225304 | -0.656445 |
| 102 | 6 | 0 | -2.084396  | -8.825420 | -0.937493 |
| 103 | 1 | 0 | -1.237408  | -9.055433 | -1.598175 |
| 104 | 1 | 0 | -2.853303  | -9.580850 | -1.131200 |
| 105 | 6 | 0 | -1.619425  | -8.888001 | 0.517253  |
| 106 | 1 | 0 | -2.483618  | -8.741327 | 1.179426  |
| 107 | 1 | 0 | -1.204804  | -9.874811 | 0.749060  |

|     |   |   |           |           |           |
|-----|---|---|-----------|-----------|-----------|
| 108 | 6 | 0 | -0.575805 | -7.806374 | 0.792092  |
| 109 | 1 | 0 | 0.321366  | -7.987859 | 0.185804  |
| 110 | 1 | 0 | -0.257815 | -7.821832 | 1.840356  |
| 111 | 6 | 0 | -1.821286 | -4.358848 | -2.208296 |
| 112 | 1 | 0 | -0.971883 | -4.675477 | -2.833780 |
| 113 | 7 | 0 | 2.233029  | 5.054482  | -1.232300 |
| 114 | 7 | 0 | 0.000000  | 5.467889  | 0.659448  |
| 115 | 7 | 0 | -0.724194 | 1.283250  | 5.453384  |
| 116 | 7 | 0 | 0.724194  | -1.283250 | 5.453384  |
| 117 | 6 | 0 | 3.583464  | 2.605336  | -1.908680 |
| 118 | 1 | 0 | 3.968551  | 3.184937  | -1.073436 |
| 119 | 6 | 0 | 2.459537  | 3.083918  | -2.595125 |
| 120 | 6 | 0 | 1.821286  | 4.358848  | -2.208296 |
| 121 | 1 | 0 | 0.971883  | 4.675477  | -2.833780 |
| 122 | 6 | 0 | 1.591938  | 6.333233  | -0.989872 |
| 123 | 1 | 0 | 0.715886  | 6.479955  | -1.647212 |
| 124 | 6 | 0 | 1.096277  | 6.399864  | 0.461513  |
| 125 | 1 | 0 | 1.953212  | 6.164064  | 1.117738  |
| 126 | 6 | 0 | 0.575805  | 7.806374  | 0.792092  |
| 127 | 1 | 0 | 0.257815  | 7.821832  | 1.840356  |
| 128 | 1 | 0 | -0.321366 | 7.987859  | 0.185804  |
| 129 | 6 | 0 | 1.619425  | 8.888001  | 0.517253  |
| 130 | 1 | 0 | 1.204804  | 9.874811  | 0.749060  |
| 131 | 1 | 0 | 2.483618  | 8.741327  | 1.179426  |
| 132 | 6 | 0 | 2.084396  | 8.825420  | -0.937493 |
| 133 | 1 | 0 | 2.853303  | 9.580850  | -1.131200 |
| 134 | 1 | 0 | 1.237408  | 9.055433  | -1.598175 |
| 135 | 6 | 0 | 2.625177  | 7.434611  | -1.264967 |
| 136 | 1 | 0 | 3.514714  | 7.225304  | -0.656445 |
| 137 | 1 | 0 | 2.935560  | 7.367941  | -2.313540 |
| 138 | 6 | 0 | 0.061898  | 4.692155  | 1.661178  |
| 139 | 1 | 0 | 0.942086  | 4.664213  | 2.322938  |
| 140 | 6 | 0 | -1.048100 | 3.798409  | 2.048970  |
| 141 | 6 | 0 | -2.220269 | 3.716222  | 1.285483  |
| 142 | 1 | 0 | -2.287285 | 4.303742  | 0.373105  |
| 143 | 6 | 0 | -3.269046 | 2.893061  | 1.682534  |
| 144 | 6 | 0 | -3.155932 | 2.150176  | 2.868815  |
| 145 | 1 | 0 | -3.968652 | 1.482616  | 3.147156  |
| 146 | 6 | 0 | -1.995078 | 2.222137  | 3.633575  |
| 147 | 6 | 0 | -0.946361 | 3.052912  | 3.216836  |
| 148 | 1 | 0 | -0.048511 | 3.099036  | 3.825997  |
| 149 | 6 | 0 | -1.824046 | 1.360246  | 4.824026  |
| 150 | 1 | 0 | -2.699775 | 0.753320  | 5.103036  |
| 151 | 6 | 0 | -0.661423 | 0.393141  | 6.600419  |
| 152 | 1 | 0 | -1.486419 | -0.342289 | 6.579002  |
| 153 | 6 | 0 | 0.661423  | -0.393141 | 6.600419  |
| 154 | 1 | 0 | 1.486419  | 0.342289  | 6.579002  |
| 155 | 6 | 0 | 0.779825  | -1.239014 | 7.876722  |
| 156 | 1 | 0 | 1.736642  | -1.772342 | 7.852727  |
| 157 | 1 | 0 | -0.009614 | -2.002209 | 7.856184  |
| 158 | 6 | 0 | 0.657182  | -0.390213 | 9.141521  |
| 159 | 1 | 0 | 1.496856  | 0.316506  | 9.189010  |
| 160 | 1 | 0 | 0.727767  | -1.027914 | 10.029125 |
| 161 | 6 | 0 | -0.657182 | 0.390213  | 9.141521  |
| 162 | 1 | 0 | -1.496856 | -0.316506 | 9.189010  |
| 163 | 1 | 0 | -0.727767 | 1.027914  | 10.029125 |
| 164 | 6 | 0 | -0.779825 | 1.239014  | 7.876722  |
| 165 | 1 | 0 | 0.009614  | 2.002209  | 7.856184  |
| 166 | 1 | 0 | -1.736642 | 1.772342  | 7.852727  |

|     |   |   |           |           |           |
|-----|---|---|-----------|-----------|-----------|
| 167 | 6 | 0 | 1.824046  | -1.360246 | 4.824026  |
| 168 | 1 | 0 | 2.699775  | -0.753320 | 5.103036  |
| 169 | 8 | 0 | 0.000000  | 0.000000  | 2.862838  |
| 170 | 6 | 0 | 1.141919  | 0.387383  | 2.227445  |
| 171 | 6 | 0 | 1.550357  | -0.116636 | 0.996049  |
| 172 | 6 | 0 | 1.975592  | 1.209216  | 2.986214  |
| 173 | 6 | 0 | 2.830388  | 0.182458  | 0.543958  |
| 174 | 1 | 0 | 0.907256  | -0.792791 | 0.441889  |
| 175 | 6 | 0 | 3.250455  | 1.502809  | 2.517324  |
| 176 | 1 | 0 | 1.611651  | 1.546258  | 3.953524  |
| 177 | 6 | 0 | 3.685557  | 0.979475  | 1.302224  |
| 178 | 1 | 0 | 3.180688  | -0.256616 | -0.384984 |
| 179 | 1 | 0 | 3.913628  | 2.121896  | 3.114625  |
| 180 | 1 | 0 | 4.700605  | 1.162113  | 0.967953  |
| 181 | 6 | 0 | -1.141919 | -0.387383 | 2.227445  |
| 182 | 6 | 0 | -1.550357 | 0.116636  | 0.996049  |
| 183 | 6 | 0 | -1.975592 | -1.209216 | 2.986214  |
| 184 | 6 | 0 | -2.830388 | -0.182458 | 0.543958  |
| 185 | 1 | 0 | -0.907256 | 0.792791  | 0.441889  |
| 186 | 6 | 0 | -3.250455 | -1.502809 | 2.517324  |
| 187 | 1 | 0 | -1.611651 | -1.546258 | 3.953524  |
| 188 | 6 | 0 | -3.685557 | -0.979475 | 1.302224  |
| 189 | 1 | 0 | -3.180688 | 0.256616  | -0.384984 |
| 190 | 1 | 0 | -3.913628 | -2.121896 | 3.114625  |
| 191 | 1 | 0 | -4.700605 | -1.162113 | 0.967953  |

-----  
Dimesitylether@CC3 C2 cc3-dpe3

Standard orientation:

| Center<br>Number | Atomic<br>Number | Atomic<br>Type | Coordinates (Angstroms) |           |            |
|------------------|------------------|----------------|-------------------------|-----------|------------|
|                  |                  |                | X                       | Y         | Z          |
| 1                | 7                | 0              | -0.824690               | 1.138569  | -6.430507  |
| 2                | 7                | 0              | 0.824690                | -1.138569 | -6.430507  |
| 3                | 7                | 0              | 5.510566                | -1.126879 | -1.886641  |
| 4                | 7                | 0              | 6.088391                | -0.068092 | 0.791678   |
| 5                | 6                | 0              | -0.982727               | 2.423564  | -3.825547  |
| 6                | 1                | 0              | -0.027256               | 2.501122  | -4.338513  |
| 7                | 6                | 0              | -1.953773               | 1.561976  | -4.347187  |
| 8                | 6                | 0              | -1.725602               | 0.816471  | -5.598852  |
| 9                | 1                | 0              | -2.410371               | -0.026576 | -5.782471  |
| 10               | 6                | 0              | -0.698775               | 0.319622  | -7.619323  |
| 11               | 1                | 0              | -1.436384               | -0.503554 | -7.620607  |
| 12               | 6                | 0              | 0.698775                | -0.319622 | -7.619323  |
| 13               | 1                | 0              | 1.436384                | 0.503554  | -7.620607  |
| 14               | 6                | 0              | 0.892278                | -1.171489 | -8.876108  |
| 15               | 1                | 0              | 1.893304                | -1.615977 | -8.856784  |
| 16               | 1                | 0              | 0.173469                | -2.000585 | -8.846763  |
| 17               | 6                | 0              | 0.687744                | -0.335911 | -10.141581 |
| 18               | 1                | 0              | 0.806257                | -0.964990 | -11.030082 |
| 19               | 1                | 0              | 1.465961                | 0.437695  | -10.194396 |
| 20               | 6                | 0              | -0.687744               | 0.335911  | -10.141581 |
| 21               | 1                | 0              | -0.806257               | 0.964990  | -11.030082 |
| 22               | 1                | 0              | -1.465961               | -0.437695 | -10.194396 |
| 23               | 6                | 0              | -0.892278               | 1.171489  | -8.876108  |
| 24               | 1                | 0              | -0.173469               | 2.000585  | -8.846763  |
| 25               | 1                | 0              | -1.893304               | 1.615977  | -8.856784  |
| 26               | 6                | 0              | 1.725602                | -0.816471 | -5.598852  |

|    |   |   |            |           |           |
|----|---|---|------------|-----------|-----------|
| 27 | 1 | 0 | 2.410371   | 0.026576  | -5.782471 |
| 28 | 6 | 0 | 1.953773   | -1.561976 | -4.347187 |
| 29 | 6 | 0 | 0.982727   | -2.423564 | -3.825547 |
| 30 | 1 | 0 | 0.027256   | -2.501122 | -4.338513 |
| 31 | 6 | 0 | 1.242870   | -3.175469 | -2.681726 |
| 32 | 6 | 0 | 2.511333   | -3.104635 | -2.090688 |
| 33 | 1 | 0 | 2.710369   | -3.727249 | -1.222494 |
| 34 | 6 | 0 | 3.481601   | -2.240965 | -2.598369 |
| 35 | 6 | 0 | 3.184043   | -1.444833 | -3.706994 |
| 36 | 1 | 0 | 3.947829   | -0.772599 | -4.090296 |
| 37 | 6 | 0 | 4.828272   | -2.193296 | -1.986231 |
| 38 | 1 | 0 | 5.204432   | -3.152025 | -1.603607 |
| 39 | 6 | 0 | 6.824547   | -1.256118 | -1.270717 |
| 40 | 1 | 0 | 6.914183   | -2.210903 | -0.722494 |
| 41 | 6 | 0 | 7.076371   | -0.103838 | -0.282811 |
| 42 | 1 | 0 | 7.038681   | 0.830447  | -0.872284 |
| 43 | 6 | 0 | 8.475208   | -0.239816 | 0.330385  |
| 44 | 1 | 0 | 8.631804   | 0.584651  | 1.034332  |
| 45 | 1 | 0 | 8.510148   | -1.168819 | 0.914735  |
| 46 | 6 | 0 | 9.559704   | -0.248504 | -0.747946 |
| 47 | 1 | 0 | 9.567184   | 0.723087  | -1.260375 |
| 48 | 1 | 0 | 10.546000  | -0.372122 | -0.288378 |
| 49 | 6 | 0 | 9.304112   | -1.354614 | -1.772938 |
| 50 | 1 | 0 | 9.407957   | -2.332032 | -1.282533 |
| 51 | 1 | 0 | 10.052662  | -1.319293 | -2.571555 |
| 52 | 6 | 0 | 7.899473   | -1.237427 | -2.366466 |
| 53 | 1 | 0 | 7.801686   | -0.302636 | -2.934167 |
| 54 | 1 | 0 | 7.701161   | -2.057930 | -3.065170 |
| 55 | 6 | 0 | 5.490828   | 1.042703  | 0.934238  |
| 56 | 1 | 0 | 5.707870   | 1.873542  | 0.243174  |
| 57 | 7 | 0 | -5.510566  | 1.126879  | -1.886641 |
| 58 | 7 | 0 | -6.088391  | 0.068092  | 0.791678  |
| 59 | 7 | 0 | -1.944369  | -4.649731 | 0.878324  |
| 60 | 7 | 0 | 0.338894   | -4.788687 | -1.113896 |
| 61 | 6 | 0 | -3.184043  | 1.444833  | -3.706994 |
| 62 | 1 | 0 | -3.947829  | 0.772599  | -4.090296 |
| 63 | 6 | 0 | -3.481601  | 2.240965  | -2.598369 |
| 64 | 6 | 0 | -4.828272  | 2.193296  | -1.986231 |
| 65 | 1 | 0 | -5.204432  | 3.152025  | -1.603607 |
| 66 | 6 | 0 | -6.824547  | 1.256118  | -1.270717 |
| 67 | 1 | 0 | -6.914183  | 2.210903  | -0.722494 |
| 68 | 6 | 0 | -7.076371  | 0.103838  | -0.282811 |
| 69 | 1 | 0 | -7.038681  | -0.830447 | -0.872284 |
| 70 | 6 | 0 | -8.475208  | 0.239816  | 0.330385  |
| 71 | 1 | 0 | -8.631804  | -0.584651 | 1.034332  |
| 72 | 1 | 0 | -8.510148  | 1.168819  | 0.914735  |
| 73 | 6 | 0 | -9.559704  | 0.248504  | -0.747946 |
| 74 | 1 | 0 | -10.546000 | 0.372122  | -0.288378 |
| 75 | 1 | 0 | -9.567184  | -0.723087 | -1.260375 |
| 76 | 6 | 0 | -9.304112  | 1.354614  | -1.772938 |
| 77 | 1 | 0 | -10.052662 | 1.319293  | -2.571555 |
| 78 | 1 | 0 | -9.407957  | 2.332032  | -1.282533 |
| 79 | 6 | 0 | -7.899473  | 1.237427  | -2.366466 |
| 80 | 1 | 0 | -7.801686  | 0.302636  | -2.934167 |
| 81 | 1 | 0 | -7.701161  | 2.057930  | -3.065170 |
| 82 | 6 | 0 | -5.490828  | -1.042703 | 0.934238  |
| 83 | 1 | 0 | -5.707870  | -1.873542 | 0.243174  |
| 84 | 6 | 0 | -4.456370  | -1.400144 | 1.930208  |
| 85 | 6 | 0 | -4.057279  | -0.623096 | 3.037725  |



|     |   |   |           |           |           |
|-----|---|---|-----------|-----------|-----------|
| 86  | 1 | 0 | -4.523014 | 0.346394  | 3.200151  |
| 87  | 6 | 0 | -3.030585 | -1.074692 | 3.871204  |
| 88  | 6 | 0 | -2.430551 | -2.315273 | 3.603346  |
| 89  | 1 | 0 | -1.665103 | -2.665702 | 4.281112  |
| 90  | 6 | 0 | -2.755631 | -3.045313 | 2.470620  |
| 91  | 6 | 0 | -3.792580 | -2.591295 | 1.654764  |
| 92  | 1 | 0 | -4.042861 | -3.170043 | 0.769315  |
| 93  | 6 | 0 | -1.933788 | -4.204440 | 2.067292  |
| 94  | 1 | 0 | -1.278875 | -4.630067 | 2.844598  |
| 95  | 6 | 0 | -1.130749 | -5.825966 | 0.598488  |
| 96  | 1 | 0 | -0.238013 | -5.857643 | 1.246374  |
| 97  | 6 | 0 | -0.660862 | -5.818185 | -0.863845 |
| 98  | 1 | 0 | -1.556394 | -5.669918 | -1.493729 |
| 99  | 6 | 0 | -0.000000 | -7.156877 | -1.235095 |
| 100 | 1 | 0 | 0.285446  | -7.117115 | -2.292062 |
| 101 | 1 | 0 | 0.931025  | -7.245675 | -0.659688 |
| 102 | 6 | 0 | -0.900819 | -8.357226 | -0.955273 |
| 103 | 1 | 0 | -1.797551 | -8.301003 | -1.587248 |
| 104 | 1 | 0 | -0.381131 | -9.283973 | -1.220909 |
| 105 | 6 | 0 | -1.319379 | -8.372104 | 0.513305  |
| 106 | 1 | 0 | -0.429363 | -8.509201 | 1.142354  |
| 107 | 1 | 0 | -1.988940 | -9.214034 | 0.719268  |
| 108 | 6 | 0 | -2.007001 | -7.059370 | 0.879586  |
| 109 | 1 | 0 | -2.936712 | -6.951563 | 0.304523  |
| 110 | 1 | 0 | -2.288935 | -7.045186 | 1.938551  |
| 111 | 6 | 0 | 0.205896  | -4.101704 | -2.172463 |
| 112 | 1 | 0 | -0.687191 | -4.193876 | -2.811738 |
| 113 | 7 | 0 | -0.338894 | 4.788687  | -1.113896 |
| 114 | 7 | 0 | 1.944369  | 4.649731  | 0.878324  |
| 115 | 7 | 0 | 1.391433  | 0.643508  | 5.565783  |
| 116 | 7 | 0 | -1.391433 | -0.643508 | 5.565783  |
| 117 | 6 | 0 | -2.511333 | 3.104635  | -2.090688 |
| 118 | 1 | 0 | -2.710369 | 3.727249  | -1.222494 |
| 119 | 6 | 0 | -1.242870 | 3.175469  | -2.681726 |
| 120 | 6 | 0 | -0.205896 | 4.101704  | -2.172463 |
| 121 | 1 | 0 | 0.687191  | 4.193876  | -2.811738 |
| 122 | 6 | 0 | 0.660862  | 5.818185  | -0.863845 |
| 123 | 1 | 0 | 1.556394  | 5.669918  | -1.493729 |
| 124 | 6 | 0 | 1.130749  | 5.825966  | 0.598488  |
| 125 | 1 | 0 | 0.238013  | 5.857643  | 1.246374  |
| 126 | 6 | 0 | 2.007001  | 7.059370  | 0.879586  |
| 127 | 1 | 0 | 2.288935  | 7.045186  | 1.938551  |
| 128 | 1 | 0 | 2.936712  | 6.951563  | 0.304523  |
| 129 | 6 | 0 | 1.319379  | 8.372104  | 0.513305  |
| 130 | 1 | 0 | 1.988940  | 9.214034  | 0.719268  |
| 131 | 1 | 0 | 0.429363  | 8.509201  | 1.142354  |
| 132 | 6 | 0 | 0.900819  | 8.357226  | -0.955273 |
| 133 | 1 | 0 | 0.381131  | 9.283973  | -1.220909 |
| 134 | 1 | 0 | 1.797551  | 8.301003  | -1.587248 |
| 135 | 6 | 0 | 0.000000  | 7.156877  | -1.235095 |
| 136 | 1 | 0 | -0.931025 | 7.245675  | -0.659688 |
| 137 | 1 | 0 | -0.285446 | 7.117115  | -2.292062 |
| 138 | 6 | 0 | 1.933788  | 4.204440  | 2.067292  |
| 139 | 1 | 0 | 1.278875  | 4.630067  | 2.844598  |
| 140 | 6 | 0 | 2.755631  | 3.045313  | 2.470620  |
| 141 | 6 | 0 | 3.792580  | 2.591295  | 1.654764  |
| 142 | 1 | 0 | 4.042861  | 3.170043  | 0.769315  |
| 143 | 6 | 0 | 4.456370  | 1.400144  | 1.930208  |
| 144 | 6 | 0 | 4.057279  | 0.623096  | 3.037725  |

|     |   |   |           |           |           |
|-----|---|---|-----------|-----------|-----------|
| 145 | 1 | 0 | 4.523014  | -0.346394 | 3.200151  |
| 146 | 6 | 0 | 3.030585  | 1.074692  | 3.871204  |
| 147 | 6 | 0 | 2.430551  | 2.315273  | 3.603346  |
| 148 | 1 | 0 | 1.665103  | 2.665702  | 4.281112  |
| 149 | 6 | 0 | 2.442671  | 0.250034  | 4.969036  |
| 150 | 1 | 0 | 2.940150  | -0.706693 | 5.193450  |
| 151 | 6 | 0 | 0.775627  | -0.084329 | 6.663777  |
| 152 | 1 | 0 | 1.000005  | -1.163478 | 6.624009  |
| 153 | 6 | 0 | -0.775627 | 0.084329  | 6.663777  |
| 154 | 1 | 0 | -1.000005 | 1.163478  | 6.624009  |
| 155 | 6 | 0 | -1.369826 | -0.500472 | 7.958690  |
| 156 | 1 | 0 | -2.453980 | -0.343567 | 7.936240  |
| 157 | 1 | 0 | -1.208143 | -1.586750 | 7.944905  |
| 158 | 6 | 0 | -0.756718 | 0.100201  | 9.220713  |
| 159 | 1 | 0 | -0.980542 | 1.174747  | 9.263417  |
| 160 | 1 | 0 | -1.209465 | -0.355593 | 10.107753 |
| 161 | 6 | 0 | 0.756718  | -0.100201 | 9.220713  |
| 162 | 1 | 0 | 0.980542  | -1.174747 | 9.263417  |
| 163 | 1 | 0 | 1.209465  | 0.355593  | 10.107753 |
| 164 | 6 | 0 | 1.369826  | 0.500472  | 7.958690  |
| 165 | 1 | 0 | 1.208143  | 1.586750  | 7.944905  |
| 166 | 1 | 0 | 2.453980  | 0.343567  | 7.936240  |
| 167 | 6 | 0 | -2.442671 | -0.250034 | 4.969036  |
| 168 | 1 | 0 | -2.940150 | 0.706693  | 5.193450  |
| 169 | 8 | 0 | 0.000000  | -0.000000 | 2.721316  |
| 170 | 6 | 0 | -1.005828 | 0.732321  | 2.120663  |
| 171 | 6 | 0 | -1.712962 | 0.316674  | 0.977719  |
| 172 | 6 | 0 | -1.422676 | 1.867920  | 2.835810  |
| 173 | 6 | 0 | -2.830241 | 1.066610  | 0.583476  |
| 174 | 6 | 0 | -2.539605 | 2.564610  | 2.400642  |
| 175 | 6 | 0 | -3.274628 | 2.188754  | 1.290073  |
| 176 | 1 | 0 | -3.407770 | 0.703691  | -0.263518 |
| 177 | 1 | 0 | -2.864967 | 3.422657  | 2.987498  |
| 178 | 6 | 0 | 1.005828  | -0.732321 | 2.120663  |
| 179 | 6 | 0 | 1.712962  | -0.316674 | 0.977719  |
| 180 | 6 | 0 | 1.422676  | -1.867920 | 2.835810  |
| 181 | 6 | 0 | 2.830241  | -1.066610 | 0.583476  |
| 182 | 6 | 0 | 2.539605  | -2.564610 | 2.400642  |
| 183 | 6 | 0 | 3.274628  | -2.188754 | 1.290073  |
| 184 | 1 | 0 | 3.407770  | -0.703691 | -0.263518 |
| 185 | 1 | 0 | 2.864967  | -3.422657 | 2.987498  |
| 186 | 6 | 0 | 0.787509  | -2.369746 | 4.098182  |
| 187 | 6 | 0 | -0.787509 | 2.369746  | 4.098182  |
| 188 | 6 | 0 | 1.382710  | 0.953819  | 0.226673  |
| 189 | 6 | 0 | -1.382710 | -0.953819 | 0.226673  |
| 190 | 6 | 0 | 4.526321  | -2.972358 | 0.992123  |
| 191 | 6 | 0 | -4.526321 | 2.972358  | 0.992123  |
| 192 | 1 | 0 | -5.325623 | 2.318050  | 0.648255  |
| 193 | 1 | 0 | -4.357301 | 3.764924  | 0.254666  |
| 194 | 1 | 0 | -4.873930 | 3.464621  | 1.905841  |
| 195 | 1 | 0 | -0.283758 | 3.325997  | 3.915836  |
| 196 | 1 | 0 | -0.075534 | 1.667012  | 4.519580  |
| 197 | 1 | 0 | -1.562324 | 2.572838  | 4.847106  |
| 198 | 1 | 0 | -2.272024 | -1.309901 | -0.300977 |
| 199 | 1 | 0 | -1.050763 | -1.751824 | 0.893726  |
| 200 | 1 | 0 | -0.592562 | -0.813173 | -0.517832 |
| 201 | 1 | 0 | 4.357301  | -3.764924 | 0.254666  |
| 202 | 1 | 0 | 4.873930  | -3.464621 | 1.905841  |
| 203 | 1 | 0 | 5.325623  | -2.318050 | 0.648255  |

|     |   |   |          |           |           |
|-----|---|---|----------|-----------|-----------|
| 204 | 1 | 0 | 1.050763 | 1.751824  | 0.893726  |
| 205 | 1 | 0 | 0.592562 | 0.813173  | -0.517832 |
| 206 | 1 | 0 | 2.272024 | 1.309901  | -0.300977 |
| 207 | 1 | 0 | 0.075534 | -1.667012 | 4.519580  |
| 208 | 1 | 0 | 1.562324 | -2.572838 | 4.847106  |
| 209 | 1 | 0 | 0.283758 | -3.325997 | 3.915836  |

-----  
 Octachloropropane@CC3 C1 cc3-dpe5  
 Standard orientation:

| Center<br>Number | Atomic<br>Number | Atomic<br>Type | Coordinates (Angstroms) |           |            |
|------------------|------------------|----------------|-------------------------|-----------|------------|
|                  |                  |                | X                       | Y         | Z          |
| 1                | 7                | 0              | -0.847280               | 1.899475  | -5.246558  |
| 2                | 7                | 0              | 0.058735                | -0.927091 | -5.584802  |
| 3                | 7                | 0              | -2.376089               | -5.158142 | -1.441080  |
| 4                | 7                | 0              | -3.820784               | -4.331615 | 1.065707   |
| 5                | 6                | 0              | -1.955525               | 3.372510  | -3.008004  |
| 6                | 1                | 0              | -2.642471               | 2.778945  | -3.606375  |
| 7                | 6                | 0              | -0.610648               | 3.439359  | -3.401626  |
| 8                | 6                | 0              | -0.130393               | 2.728741  | -4.605603  |
| 9                | 1                | 0              | 0.904703                | 2.956146  | -4.907814  |
| 10               | 6                | 0              | -0.290043               | 1.341750  | -6.469796  |
| 11               | 1                | 0              | 0.810406                | 1.432908  | -6.486663  |
| 12               | 6                | 0              | -0.637120               | -0.148790 | -6.597252  |
| 13               | 1                | 0              | -1.732730               | -0.247391 | -6.497747  |
| 14               | 6                | 0              | -0.205326               | -0.688217 | -7.970117  |
| 15               | 1                | 0              | -0.492064               | -1.743929 | -8.031833  |
| 16               | 1                | 0              | 0.891158                | -0.654518 | -8.019694  |
| 17               | 6                | 0              | -0.806054               | 0.111797  | -9.124351  |
| 18               | 1                | 0              | -0.460535               | -0.295003 | -10.080632 |
| 19               | 1                | 0              | -1.899779               | 0.010775  | -9.110522  |
| 20               | 6                | 0              | -0.435317               | 1.588767  | -8.999529  |
| 21               | 1                | 0              | -0.890526               | 2.172544  | -9.806590  |
| 22               | 1                | 0              | 0.652985                | 1.698654  | -9.100214  |
| 23               | 6                | 0              | -0.879955               | 2.137549  | -7.645277  |
| 24               | 1                | 0              | -1.974639               | 2.101311  | -7.566087  |
| 25               | 1                | 0              | -0.589401               | 3.188018  | -7.532114  |
| 26               | 6                | 0              | -0.592110               | -1.853405 | -5.010819  |
| 27               | 1                | 0              | -1.663374               | -2.018316 | -5.209185  |
| 28               | 6                | 0              | 0.019252                | -2.774300 | -4.029209  |
| 29               | 6                | 0              | 1.396986                | -2.737165 | -3.765377  |
| 30               | 1                | 0              | 2.007943                | -2.016313 | -4.303703  |
| 31               | 6                | 0              | 1.958415                | -3.573025 | -2.806118  |
| 32               | 6                | 0              | 1.135125                | -4.464410 | -2.101803  |
| 33               | 1                | 0              | 1.582871                | -5.085041 | -1.329086  |
| 34               | 6                | 0              | -0.237950               | -4.490632 | -2.334376  |
| 35               | 6                | 0              | -0.787445               | -3.655932 | -3.319154  |
| 36               | 1                | 0              | -1.863510               | -3.675805 | -3.472519  |
| 37               | 6                | 0              | -1.114685               | -5.296700 | -1.456782  |
| 38               | 1                | 0              | -0.598189               | -6.004648 | -0.788524  |
| 39               | 6                | 0              | -3.138348               | -6.047890 | -0.578125  |
| 40               | 1                | 0              | -2.506144               | -6.471031 | 0.222508   |
| 41               | 6                | 0              | -4.302290               | -5.297962 | 0.089246   |
| 42               | 1                | 0              | -4.882415               | -4.804794 | -0.710941  |
| 43               | 6                | 0              | -5.216495               | -6.278583 | 0.842010   |
| 44               | 1                | 0              | -6.045450               | -5.710393 | 1.278386   |
| 45               | 1                | 0              | -4.645990               | -6.700126 | 1.680302   |

|     |   |   |           |           |           |
|-----|---|---|-----------|-----------|-----------|
| 46  | 6 | 0 | -5.733893 | -7.401384 | -0.054541 |
| 47  | 1 | 0 | -6.364671 | -6.977007 | -0.847455 |
| 48  | 1 | 0 | -6.366202 | -8.081482 | 0.526051  |
| 49  | 6 | 0 | -4.566998 | -8.155811 | -0.689291 |
| 50  | 1 | 0 | -3.984205 | -8.651212 | 0.099130  |
| 51  | 1 | 0 | -4.931116 | -8.942499 | -1.358605 |
| 52  | 6 | 0 | -3.667255 | -7.191688 | -1.459386 |
| 53  | 1 | 0 | -4.222882 | -6.747267 | -2.295918 |
| 54  | 1 | 0 | -2.809081 | -7.716532 | -1.893792 |
| 55  | 6 | 0 | -4.398296 | -3.201878 | 1.096911  |
| 56  | 1 | 0 | -5.169055 | -2.923627 | 0.360205  |
| 57  | 7 | 0 | 2.117713  | 5.195145  | -0.639062 |
| 58  | 7 | 0 | 3.938038  | 4.017251  | 1.452656  |
| 59  | 7 | 0 | 5.383209  | -2.170889 | 0.482309  |
| 60  | 7 | 0 | 3.943720  | -3.967390 | -1.475919 |
| 61  | 6 | 0 | 0.297285  | 4.135060  | -2.613675 |
| 62  | 1 | 0 | 1.351894  | 4.166741  | -2.876497 |
| 63  | 6 | 0 | -0.120382 | 4.773846  | -1.436281 |
| 64  | 6 | 0 | 0.867878  | 5.397139  | -0.530629 |
| 65  | 1 | 0 | 0.451200  | 6.038269  | 0.262964  |
| 66  | 6 | 0 | 2.991082  | 5.954251  | 0.249658  |
| 67  | 1 | 0 | 2.474924  | 6.206756  | 1.191923  |
| 68  | 6 | 0 | 4.254884  | 5.155499  | 0.603740  |
| 69  | 1 | 0 | 4.718700  | 4.830929  | -0.345082 |
| 70  | 6 | 0 | 5.252422  | 6.033558  | 1.376796  |
| 71  | 1 | 0 | 6.146218  | 5.435385  | 1.585709  |
| 72  | 1 | 0 | 4.804454  | 6.282506  | 2.348054  |
| 73  | 6 | 0 | 5.612025  | 7.312693  | 0.624530  |
| 74  | 1 | 0 | 6.310626  | 7.912098  | 1.217840  |
| 75  | 1 | 0 | 6.125935  | 7.056256  | -0.311837 |
| 76  | 6 | 0 | 4.350360  | 8.111852  | 0.304255  |
| 77  | 1 | 0 | 4.596065  | 9.015239  | -0.264045 |
| 78  | 1 | 0 | 3.882365  | 8.441044  | 1.241939  |
| 79  | 6 | 0 | 3.363054  | 7.254255  | -0.484261 |
| 80  | 1 | 0 | 3.795019  | 6.983672  | -1.457167 |
| 81  | 1 | 0 | 2.440915  | 7.808713  | -0.692062 |
| 82  | 6 | 0 | 4.526057  | 2.922648  | 1.194861  |
| 83  | 1 | 0 | 5.185800  | 2.810655  | 0.319290  |
| 84  | 6 | 0 | 4.348274  | 1.701803  | 2.010473  |
| 85  | 6 | 0 | 3.624804  | 1.735298  | 3.210052  |
| 86  | 1 | 0 | 3.225913  | 2.688786  | 3.547532  |
| 87  | 6 | 0 | 3.346256  | 0.558898  | 3.901468  |
| 88  | 6 | 0 | 3.845715  | -0.659236 | 3.417113  |
| 89  | 1 | 0 | 3.596278  | -1.571761 | 3.953298  |
| 90  | 6 | 0 | 4.567172  | -0.706821 | 2.227105  |
| 91  | 6 | 0 | 4.822666  | 0.482826  | 1.530486  |
| 92  | 1 | 0 | 5.355784  | 0.425944  | 0.584433  |
| 93  | 6 | 0 | 4.945765  | -2.020882 | 1.664635  |
| 94  | 1 | 0 | 4.802340  | -2.879149 | 2.340773  |
| 95  | 6 | 0 | 5.798928  | -3.511949 | 0.094628  |
| 96  | 1 | 0 | 5.342705  | -4.277656 | 0.746493  |
| 97  | 6 | 0 | 5.387774  | -3.823905 | -1.352887 |
| 98  | 1 | 0 | 5.764493  | -3.002764 | -1.989024 |
| 99  | 6 | 0 | 6.009412  | -5.150309 | -1.821262 |
| 100 | 1 | 0 | 5.716481  | -5.317321 | -2.863752 |
| 101 | 1 | 0 | 5.560579  | -5.961706 | -1.232907 |
| 102 | 6 | 0 | 7.528341  | -5.174103 | -1.667722 |
| 103 | 1 | 0 | 7.975597  | -4.407958 | -2.315473 |
| 104 | 1 | 0 | 7.922129  | -6.140980 | -1.998712 |

|     |   |   |           |           |           |
|-----|---|---|-----------|-----------|-----------|
| 105 | 6 | 0 | 7.918292  | -4.897652 | -0.217115 |
| 106 | 1 | 0 | 7.541167  | -5.708978 | 0.420224  |
| 107 | 1 | 0 | 9.007448  | -4.882647 | -0.103133 |
| 108 | 6 | 0 | 7.328687  | -3.567446 | 0.246092  |
| 109 | 1 | 0 | 7.757307  | -2.743255 | -0.339618 |
| 110 | 1 | 0 | 7.576905  | -3.371164 | 1.295118  |
| 111 | 6 | 0 | 3.397604  | -3.439951 | -2.492949 |
| 112 | 1 | 0 | 3.973750  | -2.824723 | -3.204255 |
| 113 | 7 | 0 | -4.150317 | 4.088993  | -0.207395 |
| 114 | 7 | 0 | -5.279978 | 1.908567  | 1.547542  |
| 115 | 7 | 0 | -1.147211 | -0.760036 | 5.660633  |
| 116 | 7 | 0 | 1.863174  | -0.438674 | 5.528698  |
| 117 | 6 | 0 | -1.466062 | 4.746733  | -1.085986 |
| 118 | 1 | 0 | -1.815505 | 5.220781  | -0.171188 |
| 119 | 6 | 0 | -2.385511 | 4.013842  | -1.852685 |
| 120 | 6 | 0 | -3.770237 | 3.798170  | -1.382771 |
| 121 | 1 | 0 | -4.450097 | 3.332699  | -2.114150 |
| 122 | 6 | 0 | -5.559312 | 3.893152  | 0.101312  |
| 123 | 1 | 0 | -6.036875 | 3.209415  | -0.622859 |
| 124 | 6 | 0 | -5.743181 | 3.288790  | 1.501888  |
| 125 | 1 | 0 | -5.187978 | 3.922258  | 2.216166  |
| 126 | 6 | 0 | -7.230775 | 3.273182  | 1.893011  |
| 127 | 1 | 0 | -7.314835 | 2.865850  | 2.906717  |
| 128 | 1 | 0 | -7.749077 | 2.571019  | 1.226394  |
| 129 | 6 | 0 | -7.878421 | 4.653147  | 1.801915  |
| 130 | 1 | 0 | -8.937542 | 4.587064  | 2.072803  |
| 131 | 1 | 0 | -7.404778 | 5.330026  | 2.525958  |
| 132 | 6 | 0 | -7.713004 | 5.225210  | 0.395517  |
| 133 | 1 | 0 | -8.147439 | 6.228464  | 0.330531  |
| 134 | 1 | 0 | -8.258062 | 4.593775  | -0.319230 |
| 135 | 6 | 0 | -6.235498 | 5.271543  | 0.013132  |
| 136 | 1 | 0 | -5.697181 | 5.957858  | 0.680390  |
| 137 | 1 | 0 | -6.104576 | 5.653980  | -1.005278 |
| 138 | 6 | 0 | -4.673240 | 1.539538  | 2.599612  |
| 139 | 1 | 0 | -4.422782 | 2.250487  | 3.403573  |
| 140 | 6 | 0 | -4.236258 | 0.146228  | 2.832060  |
| 141 | 6 | 0 | -4.607909 | -0.883573 | 1.955059  |
| 142 | 1 | 0 | -5.270242 | -0.643964 | 1.126803  |
| 143 | 6 | 0 | -4.086263 | -2.165082 | 2.104458  |
| 144 | 6 | 0 | -3.197427 | -2.426885 | 3.156634  |
| 145 | 1 | 0 | -2.769533 | -3.423258 | 3.236796  |
| 146 | 6 | 0 | -2.811349 | -1.411302 | 4.028832  |
| 147 | 6 | 0 | -3.357853 | -0.127800 | 3.875717  |
| 148 | 1 | 0 | -3.022630 | 0.661096  | 4.544598  |
| 149 | 6 | 0 | -1.752453 | -1.679310 | 5.028092  |
| 150 | 1 | 0 | -1.503564 | -2.743028 | 5.173737  |
| 151 | 6 | 0 | -0.196371 | -1.179632 | 6.682760  |
| 152 | 1 | 0 | 0.157197  | -2.209790 | 6.500598  |
| 153 | 6 | 0 | 1.037445  | -0.263398 | 6.717056  |
| 154 | 1 | 0 | 0.680579  | 0.777746  | 6.805959  |
| 155 | 6 | 0 | 1.924505  | -0.596424 | 7.929044  |
| 156 | 1 | 0 | 2.773366  | 0.096442  | 7.933350  |
| 157 | 1 | 0 | 2.338995  | -1.602487 | 7.779827  |
| 158 | 6 | 0 | 1.163029  | -0.537351 | 9.251187  |
| 159 | 1 | 0 | 0.815339  | 0.489256  | 9.429548  |
| 160 | 1 | 0 | 1.831854  | -0.795902 | 10.078994 |
| 161 | 6 | 0 | -0.040068 | -1.477091 | 9.211990  |
| 162 | 1 | 0 | 0.312409  | -2.513238 | 9.118196  |
| 163 | 1 | 0 | -0.610704 | -1.417364 | 10.144858 |

|     |    |   |           |           |           |
|-----|----|---|-----------|-----------|-----------|
| 164 | 6  | 0 | -0.941308 | -1.134772 | 8.028128  |
| 165 | 1  | 0 | -1.357043 | -0.125904 | 8.152727  |
| 166 | 1  | 0 | -1.793008 | -1.821769 | 7.971354  |
| 167 | 6  | 0 | 2.419789  | 0.599443  | 5.055073  |
| 168 | 1  | 0 | 2.216369  | 1.603473  | 5.461319  |
| 169 | 6  | 0 | -1.209359 | 0.343191  | -0.035094 |
| 170 | 6  | 0 | 0.083302  | -0.146674 | -0.837170 |
| 171 | 6  | 0 | 1.493452  | 0.343295  | -0.289315 |
| 172 | 17 | 0 | -0.025086 | 0.354104  | -2.533099 |
| 173 | 17 | 0 | 0.045929  | -1.916434 | -0.752430 |
| 174 | 17 | 0 | -2.673219 | -0.013354 | -1.010316 |
| 175 | 17 | 0 | 2.796504  | -0.601999 | -1.073671 |
| 176 | 17 | 0 | -1.174174 | 2.072684  | 0.293700  |
| 177 | 17 | 0 | -1.404002 | -0.508123 | 1.499145  |
| 178 | 17 | 0 | 1.847753  | 2.055898  | -0.619777 |
| 179 | 17 | 0 | 1.577019  | 0.068584  | 1.444602  |

Hexchloropropene@CC3 C1 cc3-dpe77

Standard orientation:

| Center<br>Number | Atomic<br>Number | Atomic<br>Type | Coordinates (Angstroms) |           |           |
|------------------|------------------|----------------|-------------------------|-----------|-----------|
|                  |                  |                | X                       | Y         | Z         |
| 1                | 7                | 0              | 2.532703                | 0.397332  | -5.137249 |
| 2                | 7                | 0              | 1.870662                | 3.190253  | -4.507652 |
| 3                | 7                | 0              | 2.873778                | 4.952518  | 1.579947  |
| 4                | 7                | 0              | 3.289998                | 2.955814  | 3.681299  |
| 5                | 6                | 0              | 2.639983                | -1.890355 | -3.362434 |
| 6                | 1                | 0              | 3.538403                | -1.285394 | -3.458154 |
| 7                | 6                | 0              | 1.486400                | -1.488610 | -4.051447 |
| 8                | 6                | 0              | 1.497363                | -0.308217 | -4.940298 |
| 9                | 1                | 0              | 0.545539                | -0.097153 | -5.452664 |
| 10               | 6                | 0              | 2.443754                | 1.456816  | -6.126595 |
| 11               | 1                | 0              | 1.411538                | 1.569252  | -6.504868 |
| 12               | 6                | 0              | 2.849030                | 2.801991  | -5.507088 |
| 13               | 1                | 0              | 3.854154                | 2.682048  | -5.064696 |
| 14               | 6                | 0              | 2.896327                | 3.897539  | -6.581443 |
| 15               | 1                | 0              | 3.208329                | 4.835780  | -6.109345 |
| 16               | 1                | 0              | 1.875721                | 4.053560  | -6.955010 |
| 17               | 6                | 0              | 3.826149                | 3.527210  | -7.736373 |
| 18               | 1                | 0              | 3.821022                | 4.322046  | -8.489730 |
| 19               | 1                | 0              | 4.856762                | 3.446432  | -7.364831 |
| 20               | 6                | 0              | 3.408891                | 2.193256  | -8.355807 |
| 21               | 1                | 0              | 4.093775                | 1.911142  | -9.162438 |
| 22               | 1                | 0              | 2.412623                | 2.299887  | -8.806173 |
| 23               | 6                | 0              | 3.373202                | 1.095705  | -7.293024 |
| 24               | 1                | 0              | 4.380371                | 0.930175  | -6.888603 |
| 25               | 1                | 0              | 3.043007                | 0.142945  | -7.721094 |
| 26               | 6                | 0              | 2.301693                | 3.595690  | -3.386523 |
| 27               | 1                | 0              | 3.376836                | 3.619231  | -3.148305 |
| 28               | 6                | 0              | 1.399272                | 4.049576  | -2.309544 |
| 29               | 6                | 0              | 0.009412                | 4.053183  | -2.492402 |
| 30               | 1                | 0              | -0.386853               | 3.757386  | -3.460320 |
| 31               | 6                | 0              | -0.838385               | 4.411142  | -1.451170 |
| 32               | 6                | 0              | -0.295442               | 4.755673  | -0.204919 |
| 33               | 1                | 0              | -0.974347               | 5.008652  | 0.605550  |
| 34               | 6                | 0              | 1.080978                | 4.754490  | -0.011945 |
| 35               | 6                | 0              | 1.928718                | 4.419395  | -1.078627 |

|    |   |   |           |           |           |
|----|---|---|-----------|-----------|-----------|
| 36 | 1 | 0 | 3.002058  | 4.411180  | -0.905039 |
| 37 | 6 | 0 | 1.634716  | 5.042176  | 1.326862  |
| 38 | 1 | 0 | 0.900097  | 5.325012  | 2.096735  |
| 39 | 6 | 0 | 3.316692  | 5.282699  | 2.921268  |
| 40 | 1 | 0 | 2.460769  | 5.450055  | 3.599812  |
| 41 | 6 | 0 | 4.138891  | 4.119093  | 3.494563  |
| 42 | 1 | 0 | 4.960765  | 3.909832  | 2.786426  |
| 43 | 6 | 0 | 4.732444  | 4.501356  | 4.857678  |
| 44 | 1 | 0 | 5.327357  | 3.659189  | 5.228085  |
| 45 | 1 | 0 | 3.903856  | 4.640442  | 5.564459  |
| 46 | 6 | 0 | 5.573684  | 5.774905  | 4.777574  |
| 47 | 1 | 0 | 6.441754  | 5.599275  | 4.127674  |
| 48 | 1 | 0 | 5.964740  | 6.027556  | 5.768830  |
| 49 | 6 | 0 | 4.748570  | 6.931392  | 4.212565  |
| 50 | 1 | 0 | 3.932141  | 7.166949  | 4.908760  |
| 51 | 1 | 0 | 5.360760  | 7.835031  | 4.123348  |
| 52 | 6 | 0 | 4.164396  | 6.559485  | 2.850128  |
| 53 | 1 | 0 | 4.972924  | 6.393327  | 2.126173  |
| 54 | 1 | 0 | 3.544050  | 7.370288  | 2.452640  |
| 55 | 6 | 0 | 3.716361  | 1.842223  | 3.249166  |
| 56 | 1 | 0 | 4.669370  | 1.756303  | 2.703076  |
| 57 | 7 | 0 | -2.031901 | -3.868504 | -3.540861 |
| 58 | 7 | 0 | -4.386294 | -3.438783 | -1.831220 |
| 59 | 7 | 0 | -5.223151 | 2.727754  | -0.308423 |
| 60 | 7 | 0 | -3.127618 | 4.753885  | -0.771334 |
| 61 | 6 | 0 | 0.320793  | -2.235888 | -3.924485 |
| 62 | 1 | 0 | -0.590818 | -1.941629 | -4.438740 |
| 63 | 6 | 0 | 0.297089  | -3.389572 | -3.129070 |
| 64 | 6 | 0 | -0.935703 | -4.189289 | -2.987263 |
| 65 | 1 | 0 | -0.839420 | -5.101967 | -2.377251 |
| 66 | 6 | 0 | -3.135312 | -4.807863 | -3.422800 |
| 67 | 1 | 0 | -2.969879 | -5.518437 | -2.593484 |
| 68 | 6 | 0 | -4.444719 | -4.060434 | -3.141151 |
| 69 | 1 | 0 | -4.578265 | -3.308011 | -3.939225 |
| 70 | 6 | 0 | -5.634560 | -5.030098 | -3.158730 |
| 71 | 1 | 0 | -6.551480 | -4.460503 | -2.971220 |
| 72 | 1 | 0 | -5.518157 | -5.729994 | -2.320736 |
| 73 | 6 | 0 | -5.724981 | -5.799075 | -4.476135 |
| 74 | 1 | 0 | -6.571806 | -6.492907 | -4.447612 |
| 75 | 1 | 0 | -5.916490 | -5.095707 | -5.297882 |
| 76 | 6 | 0 | -4.421943 | -6.550119 | -4.750100 |
| 77 | 1 | 0 | -4.472166 | -7.073581 | -5.710738 |
| 78 | 1 | 0 | -4.277301 | -7.316414 | -3.976412 |
| 79 | 6 | 0 | -3.233965 | -5.588767 | -4.741674 |
| 80 | 1 | 0 | -3.328622 | -4.864942 | -5.561917 |
| 81 | 1 | 0 | -2.292217 | -6.126030 | -4.900014 |
| 82 | 6 | 0 | -4.748985 | -2.226459 | -1.740527 |
| 83 | 1 | 0 | -5.047227 | -1.640612 | -2.624446 |
| 84 | 6 | 0 | -4.773791 | -1.502202 | -0.455712 |
| 85 | 6 | 0 | -4.475399 | -2.163359 | 0.744995  |
| 86 | 1 | 0 | -4.258818 | -3.228081 | 0.711289  |
| 87 | 6 | 0 | -4.401004 | -1.454833 | 1.935898  |
| 88 | 6 | 0 | -4.644669 | -0.073545 | 1.937075  |
| 89 | 1 | 0 | -4.549507 | 0.469196  | 2.874074  |
| 90 | 6 | 0 | -4.942080 | 0.588163  | 0.754429  |
| 91 | 6 | 0 | -5.011531 | -0.135004 | -0.445268 |
| 92 | 1 | 0 | -5.214231 | 0.405503  | -1.366325 |
| 93 | 6 | 0 | -5.101428 | 2.054575  | 0.759898  |
| 94 | 1 | 0 | -5.093893 | 2.532797  | 1.752255  |

|     |   |   |           |           |           |
|-----|---|---|-----------|-----------|-----------|
| 95  | 6 | 0 | -5.434923 | 4.157899  | -0.182856 |
| 96  | 1 | 0 | -5.202163 | 4.514332  | 0.836627  |
| 97  | 6 | 0 | -4.519476 | 4.905083  | -1.160646 |
| 98  | 1 | 0 | -4.703032 | 4.492074  | -2.168720 |
| 99  | 6 | 0 | -4.839835 | 6.407166  | -1.164180 |
| 100 | 1 | 0 | -4.183630 | 6.901861  | -1.888749 |
| 101 | 1 | 0 | -4.585220 | 6.812921  | -0.176242 |
| 102 | 6 | 0 | -6.310132 | 6.679244  | -1.478874 |
| 103 | 1 | 0 | -6.536021 | 6.337324  | -2.498055 |
| 104 | 1 | 0 | -6.504195 | 7.756769  | -1.454350 |
| 105 | 6 | 0 | -7.214990 | 5.944902  | -0.489694 |
| 106 | 1 | 0 | -7.050945 | 6.348598  | 0.518693  |
| 107 | 1 | 0 | -8.269679 | 6.112843  | -0.732042 |
| 108 | 6 | 0 | -6.910223 | 4.447659  | -0.494936 |
| 109 | 1 | 0 | -7.140996 | 4.020029  | -1.479576 |
| 110 | 1 | 0 | -7.530930 | 3.916164  | 0.234884  |
| 111 | 6 | 0 | -2.297769 | 4.444427  | -1.679951 |
| 112 | 1 | 0 | -2.620509 | 4.216171  | -2.708065 |
| 113 | 7 | 0 | 3.809924  | -4.232778 | -0.831114 |
| 114 | 7 | 0 | 4.409263  | -3.154282 | 1.861983  |
| 115 | 7 | 0 | -0.900962 | -1.704889 | 5.202308  |
| 116 | 7 | 0 | -3.676346 | -1.499558 | 4.226760  |
| 117 | 6 | 0 | 1.450734  | -3.783765 | -2.461710 |
| 118 | 1 | 0 | 1.455300  | -4.668241 | -1.829386 |
| 119 | 6 | 0 | 2.625082  | -3.025286 | -2.557958 |
| 120 | 6 | 0 | 3.820968  | -3.366830 | -1.758350 |
| 121 | 1 | 0 | 4.723329  | -2.778818 | -1.991321 |
| 122 | 6 | 0 | 5.058441  | -4.461962 | -0.120632 |
| 123 | 1 | 0 | 5.792802  | -3.664941 | -0.336620 |
| 124 | 6 | 0 | 4.819349  | -4.470918 | 1.398883  |
| 125 | 1 | 0 | 4.041495  | -5.227805 | 1.606705  |
| 126 | 6 | 0 | 6.106699  | -4.853520 | 2.142812  |
| 127 | 1 | 0 | 5.895328  | -4.868529 | 3.217737  |
| 128 | 1 | 0 | 6.846438  | -4.059394 | 1.975933  |
| 129 | 6 | 0 | 6.664835  | -6.196705 | 1.674674  |
| 130 | 1 | 0 | 7.589763  | -6.426285 | 2.214278  |
| 131 | 1 | 0 | 5.948763  | -6.994225 | 1.915317  |
| 132 | 6 | 0 | 6.910069  | -6.179406 | 0.166148  |
| 133 | 1 | 0 | 7.276997  | -7.152454 | -0.177297 |
| 134 | 1 | 0 | 7.692652  | -5.443848 | -0.064582 |
| 135 | 6 | 0 | 5.629451  | -5.810931 | -0.581457 |
| 136 | 1 | 0 | 4.863193  | -6.580277 | -0.417880 |
| 137 | 1 | 0 | 5.804536  | -5.762957 | -1.661956 |
| 138 | 6 | 0 | 3.393416  | -3.096837 | 2.619963  |
| 139 | 1 | 0 | 2.814050  | -3.997617 | 2.879598  |
| 140 | 6 | 0 | 2.866162  | -1.833378 | 3.179030  |
| 141 | 6 | 0 | 3.547943  | -0.619965 | 3.012838  |
| 142 | 1 | 0 | 4.511585  | -0.630678 | 2.510493  |
| 143 | 6 | 0 | 2.988981  | 0.573580  | 3.457757  |
| 144 | 6 | 0 | 1.749073  | 0.552742  | 4.111003  |
| 145 | 1 | 0 | 1.330548  | 1.493474  | 4.459732  |
| 146 | 6 | 0 | 1.076446  | -0.647686 | 4.309544  |
| 147 | 6 | 0 | 1.638588  | -1.839892 | 3.833144  |
| 148 | 1 | 0 | 1.085792  | -2.765755 | 3.973591  |
| 149 | 6 | 0 | -0.209808 | -0.653119 | 5.036415  |
| 150 | 1 | 0 | -0.521761 | 0.317627  | 5.453524  |
| 151 | 6 | 0 | -2.069436 | -1.609880 | 6.061338  |
| 152 | 1 | 0 | -2.333778 | -0.556840 | 6.265803  |
| 153 | 6 | 0 | -3.284603 | -2.267695 | 5.393996  |



|     |    |   |           |           |           |
|-----|----|---|-----------|-----------|-----------|
| 154 | 1  | 0 | -3.003627 | -3.301089 | 5.122844  |
| 155 | 6  | 0 | -4.476657 | -2.305918 | 6.361200  |
| 156 | 1  | 0 | -5.316473 | -2.798620 | 5.858727  |
| 157 | 1  | 0 | -4.788130 | -1.271995 | 6.560487  |
| 158 | 6  | 0 | -4.129858 | -3.010571 | 7.671676  |
| 159 | 1  | 0 | -3.891834 | -4.063665 | 7.469119  |
| 160 | 1  | 0 | -4.996469 | -3.003329 | 8.341235  |
| 161 | 6  | 0 | -2.927429 | -2.341864 | 8.337866  |
| 162 | 1  | 0 | -3.195843 | -1.314833 | 8.620471  |
| 163 | 1  | 0 | -2.656100 | -2.865138 | 9.260869  |
| 164 | 6  | 0 | -1.733133 | -2.312087 | 7.384989  |
| 165 | 1  | 0 | -1.408618 | -3.335671 | 7.155825  |
| 166 | 1  | 0 | -0.877319 | -1.803295 | 7.842206  |
| 167 | 6  | 0 | -3.960725 | -2.137333 | 3.167450  |
| 168 | 1  | 0 | -3.863235 | -3.232671 | 3.101773  |
| 169 | 6  | 0 | 1.497675  | -1.014107 | 0.118664  |
| 170 | 6  | 0 | 0.614846  | -0.004980 | 0.042468  |
| 171 | 6  | 0 | -0.897450 | -0.183938 | 0.214509  |
| 172 | 17 | 0 | 1.200972  | 1.585170  | -0.230604 |
| 173 | 17 | 0 | -1.794743 | 1.331705  | -0.054205 |
| 174 | 17 | 0 | 3.179687  | -0.753027 | -0.128951 |
| 175 | 17 | 0 | 1.066488  | -2.634593 | 0.480014  |
| 176 | 17 | 0 | -1.512331 | -1.377963 | -0.971102 |
| 177 | 17 | 0 | -1.232957 | -0.731332 | 1.884693  |

-----  
Benzylbenzoate@CC3-a C1 cc3-dpe9  
Standard orientation:

| Center<br>Number | Atomic<br>Number | Atomic<br>Type | Coordinates (Angstroms) |           |           |
|------------------|------------------|----------------|-------------------------|-----------|-----------|
|                  |                  |                | X                       | Y         | Z         |
| 1                | 7                | 0              | 1.887212                | -4.785529 | 2.136746  |
| 2                | 7                | 0              | 1.723133                | -5.432500 | -0.697948 |
| 3                | 7                | 0              | 3.324565                | -0.332163 | -4.310490 |
| 4                | 7                | 0              | 3.517979                | 2.447870  | -3.401764 |
| 5                | 6                | 0              | 1.670841                | -2.116754 | 3.295133  |
| 6                | 1                | 0              | 2.636962                | -2.390048 | 2.877438  |
| 7                | 6                | 0              | 0.605443                | -3.020311 | 3.180394  |
| 8                | 6                | 0              | 0.771058                | -4.340429 | 2.543168  |
| 9                | 1                | 0              | -0.150436               | -4.940699 | 2.469876  |
| 10               | 6                | 0              | 1.914113                | -6.143758 | 1.624960  |
| 11               | 1                | 0              | 0.894165                | -6.557432 | 1.523352  |
| 12               | 6                | 0              | 2.560445                | -6.166374 | 0.232199  |
| 13               | 1                | 0              | 3.560490                | -5.705754 | 0.323941  |
| 14               | 6                | 0              | 2.708815                | -7.607080 | -0.271081 |
| 15               | 1                | 0              | 3.182665                | -7.588349 | -1.258691 |
| 16               | 1                | 0              | 1.703797                | -8.027316 | -0.407946 |
| 17               | 6                | 0              | 3.509048                | -8.467546 | 0.706568  |
| 18               | 1                | 0              | 3.583157                | -9.492985 | 0.329244  |
| 19               | 1                | 0              | 4.534339                | -8.079935 | 0.779433  |
| 20               | 6                | 0              | 2.864706                | -8.448857 | 2.093338  |
| 21               | 1                | 0              | 3.457452                | -9.037181 | 2.801798  |
| 22               | 1                | 0              | 1.874450                | -8.921202 | 2.037332  |
| 23               | 6                | 0              | 2.715958                | -7.014623 | 2.600971  |
| 24               | 1                | 0              | 3.704700                | -6.556642 | 2.734576  |
| 25               | 1                | 0              | 2.221166                | -6.991915 | 3.578091  |
| 26               | 6                | 0              | 2.248395                | -4.457993 | -1.314661 |
| 27               | 1                | 0              | 3.293009                | -4.153427 | -1.145436 |

|    |   |   |           |           |           |
|----|---|---|-----------|-----------|-----------|
| 28 | 6 | 0 | 1.499670  | -3.641967 | -2.290862 |
| 29 | 6 | 0 | 0.152322  | -3.906939 | -2.577207 |
| 30 | 1 | 0 | -0.323985 | -4.756237 | -2.093274 |
| 31 | 6 | 0 | -0.556710 | -3.082135 | -3.442502 |
| 32 | 6 | 0 | 0.086473  | -1.985884 | -4.035912 |
| 33 | 1 | 0 | -0.488166 | -1.350520 | -4.704943 |
| 34 | 6 | 0 | 1.427768  | -1.726514 | -3.777638 |
| 35 | 6 | 0 | 2.132614  | -2.567851 | -2.904310 |
| 36 | 1 | 0 | 3.182070  | -2.367308 | -2.710079 |
| 37 | 6 | 0 | 2.091715  | -0.594013 | -4.454984 |
| 38 | 1 | 0 | 1.450587  | -0.003559 | -5.127819 |
| 39 | 6 | 0 | 3.886313  | 0.742360  | -5.110648 |
| 40 | 1 | 0 | 3.102659  | 1.253338  | -5.698474 |
| 41 | 6 | 0 | 4.538032  | 1.798436  | -4.207202 |
| 42 | 1 | 0 | 5.287363  | 1.291224  | -3.572760 |
| 43 | 6 | 0 | 5.241893  | 2.866614  | -5.056129 |
| 44 | 1 | 0 | 5.711516  | 3.591924  | -4.382489 |
| 45 | 1 | 0 | 4.477094  | 3.410334  | -5.626564 |
| 46 | 6 | 0 | 6.270051  | 2.254418  | -6.006860 |
| 47 | 1 | 0 | 7.070388  | 1.780734  | -5.422172 |
| 48 | 1 | 0 | 6.738454  | 3.040643  | -6.608300 |
| 49 | 6 | 0 | 5.616073  | 1.205167  | -6.906288 |
| 50 | 1 | 0 | 4.878693  | 1.695218  | -7.556521 |
| 51 | 1 | 0 | 6.359897  | 0.741622  | -7.562838 |
| 52 | 6 | 0 | 4.920957  | 0.134279  | -6.066131 |
| 53 | 1 | 0 | 5.660811  | -0.411939 | -5.465569 |
| 54 | 1 | 0 | 4.421818  | -0.604341 | -6.702713 |
| 55 | 6 | 0 | 3.798350  | 2.665673  | -2.183659 |
| 56 | 1 | 0 | 4.747786  | 2.335627  | -1.734130 |
| 57 | 7 | 0 | -3.211317 | -1.738840 | 4.595955  |
| 58 | 7 | 0 | -5.210556 | -0.313910 | 3.035257  |
| 59 | 7 | 0 | -4.907462 | -1.386456 | -3.289898 |
| 60 | 7 | 0 | -2.640306 | -2.685702 | -4.572799 |
| 61 | 6 | 0 | -0.635339 | -2.682028 | 3.704667  |
| 62 | 1 | 0 | -1.478956 | -3.362585 | 3.620665  |
| 63 | 6 | 0 | -0.830781 | -1.448157 | 4.336925  |
| 64 | 6 | 0 | -2.165640 | -1.054588 | 4.822738  |
| 65 | 1 | 0 | -2.206544 | -0.106626 | 5.383379  |
| 66 | 6 | 0 | -4.459175 | -1.256706 | 5.160522  |
| 67 | 1 | 0 | -4.357514 | -0.220123 | 5.529875  |
| 68 | 6 | 0 | -5.553981 | -1.257190 | 4.084749  |
| 69 | 1 | 0 | -5.631553 | -2.285532 | 3.687516  |
| 70 | 6 | 0 | -6.902856 | -0.849920 | 4.691872  |
| 71 | 1 | 0 | -7.663883 | -0.872744 | 3.903970  |
| 72 | 1 | 0 | -6.826633 | 0.191514  | 5.031310  |
| 73 | 6 | 0 | -7.294077 | -1.756622 | 5.859096  |
| 74 | 1 | 0 | -8.248778 | -1.428756 | 6.283787  |
| 75 | 1 | 0 | -7.444241 | -2.780466 | 5.490448  |
| 76 | 6 | 0 | -6.202382 | -1.763091 | 6.929958  |
| 77 | 1 | 0 | -6.468136 | -2.442737 | 7.746506  |
| 78 | 1 | 0 | -6.118744 | -0.758402 | 7.366207  |
| 79 | 6 | 0 | -4.856525 | -2.168333 | 6.328727  |
| 80 | 1 | 0 | -4.902981 | -3.201014 | 5.958573  |
| 81 | 1 | 0 | -4.062993 | -2.136757 | 7.083401  |
| 82 | 6 | 0 | -5.314977 | -0.710102 | 1.834236  |
| 83 | 1 | 0 | -5.614242 | -1.741649 | 1.587663  |
| 84 | 6 | 0 | -5.012976 | 0.157146  | 0.679462  |
| 85 | 6 | 0 | -4.724130 | 1.516946  | 0.854660  |
| 86 | 1 | 0 | -4.772922 | 1.934487  | 1.857594  |

|     |   |   |           |           |           |
|-----|---|---|-----------|-----------|-----------|
| 87  | 6 | 0 | -4.369991 | 2.307743  | -0.231459 |
| 88  | 6 | 0 | -4.300381 | 1.734197  | -1.509173 |
| 89  | 1 | 0 | -4.024325 | 2.368038  | -2.348099 |
| 90  | 6 | 0 | -4.594167 | 0.388671  | -1.694817 |
| 91  | 6 | 0 | -4.954279 | -0.397524 | -0.591930 |
| 92  | 1 | 0 | -5.168834 | -1.450813 | -0.753488 |
| 93  | 6 | 0 | -4.561375 | -0.189801 | -3.053023 |
| 94  | 1 | 0 | -4.242465 | 0.493927  | -3.855442 |
| 95  | 6 | 0 | -4.917444 | -1.829681 | -4.670519 |
| 96  | 1 | 0 | -4.523502 | -1.051507 | -5.349255 |
| 97  | 6 | 0 | -4.017778 | -3.065413 | -4.820910 |
| 98  | 1 | 0 | -4.366154 | -3.824167 | -4.097306 |
| 99  | 6 | 0 | -4.116587 | -3.635137 | -6.241961 |
| 100 | 1 | 0 | -3.479378 | -4.523810 | -6.309096 |
| 101 | 1 | 0 | -3.702409 | -2.893143 | -6.937094 |
| 102 | 6 | 0 | -5.560062 | -3.962973 | -6.623292 |
| 103 | 1 | 0 | -5.939522 | -4.759055 | -5.968303 |
| 104 | 1 | 0 | -5.597456 | -4.349411 | -7.647279 |
| 105 | 6 | 0 | -6.449868 | -2.727517 | -6.480372 |
| 106 | 1 | 0 | -6.125762 | -1.963629 | -7.200244 |
| 107 | 1 | 0 | -7.489660 | -2.971263 | -6.722647 |
| 108 | 6 | 0 | -6.362280 | -2.161803 | -5.063187 |
| 109 | 1 | 0 | -6.753406 | -2.890729 | -4.341451 |
| 110 | 1 | 0 | -6.970641 | -1.256541 | -4.961313 |
| 111 | 6 | 0 | -1.980100 | -3.357610 | -3.724863 |
| 112 | 1 | 0 | -2.427930 | -4.190847 | -3.160847 |
| 113 | 7 | 0 | 2.576325  | 1.098639  | 4.750883  |
| 114 | 7 | 0 | 3.458609  | 3.239157  | 2.946357  |
| 115 | 7 | 0 | -1.256441 | 5.787727  | -0.641647 |
| 116 | 7 | 0 | -3.861689 | 4.539655  | -0.986682 |
| 117 | 6 | 0 | 0.237068  | -0.568375 | 4.463609  |
| 118 | 1 | 0 | 0.117231  | 0.392650  | 4.957534  |
| 119 | 6 | 0 | 1.495155  | -0.899704 | 3.943640  |
| 120 | 6 | 0 | 2.648557  | 0.004292  | 4.115322  |
| 121 | 1 | 0 | 3.592356  | -0.356014 | 3.679305  |
| 122 | 6 | 0 | 3.802029  | 1.852059  | 4.931596  |
| 123 | 1 | 0 | 4.647175  | 1.391892  | 4.385391  |
| 124 | 6 | 0 | 3.624908  | 3.277467  | 4.387514  |
| 125 | 1 | 0 | 2.739654  | 3.713130  | 4.884935  |
| 126 | 6 | 0 | 4.857614  | 4.135863  | 4.700658  |
| 127 | 1 | 0 | 4.687495  | 5.147488  | 4.315900  |
| 128 | 1 | 0 | 5.709588  | 3.723618  | 4.143951  |
| 129 | 6 | 0 | 5.171795  | 4.161353  | 6.195754  |
| 130 | 1 | 0 | 6.065115  | 4.767501  | 6.380415  |
| 131 | 1 | 0 | 4.343986  | 4.640971  | 6.735660  |
| 132 | 6 | 0 | 5.362999  | 2.740887  | 6.728196  |
| 133 | 1 | 0 | 5.557291  | 2.755245  | 7.805958  |
| 134 | 1 | 0 | 6.245571  | 2.292533  | 6.251549  |
| 135 | 6 | 0 | 4.132418  | 1.885262  | 6.429608  |
| 136 | 1 | 0 | 3.258635  | 2.284255  | 6.961347  |
| 137 | 1 | 0 | 4.272518  | 0.856424  | 6.778759  |
| 138 | 6 | 0 | 2.431824  | 3.798030  | 2.456330  |
| 139 | 1 | 0 | 1.661532  | 4.261104  | 3.092338  |
| 140 | 6 | 0 | 2.194772  | 3.881577  | 1.001063  |
| 141 | 6 | 0 | 3.120225  | 3.340265  | 0.097598  |
| 142 | 1 | 0 | 4.020624  | 2.876855  | 0.494634  |
| 143 | 6 | 0 | 2.864313  | 3.350326  | -1.267899 |
| 144 | 6 | 0 | 1.697154  | 3.962771  | -1.747624 |
| 145 | 1 | 0 | 1.513297  | 3.964096  | -2.819234 |

|     |   |   |           |           |           |
|-----|---|---|-----------|-----------|-----------|
| 146 | 6 | 0 | 0.792830  | 4.541807  | -0.864906 |
| 147 | 6 | 0 | 1.041588  | 4.487024  | 0.515851  |
| 148 | 1 | 0 | 0.311520  | 4.925077  | 1.191906  |
| 149 | 6 | 0 | -0.418983 | 5.200815  | -1.390909 |
| 150 | 1 | 0 | -0.542656 | 5.163794  | -2.484766 |
| 151 | 6 | 0 | -2.376957 | 6.454301  | -1.277502 |
| 152 | 1 | 0 | -2.410378 | 6.242669  | -2.361630 |
| 153 | 6 | 0 | -3.690399 | 5.944823  | -0.667974 |
| 154 | 1 | 0 | -3.636196 | 6.108087  | 0.423607  |
| 155 | 6 | 0 | -4.883895 | 6.723304  | -1.236466 |
| 156 | 1 | 0 | -5.801676 | 6.347943  | -0.770690 |
| 157 | 1 | 0 | -4.957702 | 6.501438  | -2.309146 |
| 158 | 6 | 0 | -4.733726 | 8.229187  | -1.020230 |
| 159 | 1 | 0 | -4.737840 | 8.445837  | 0.056711  |
| 160 | 1 | 0 | -5.590143 | 8.756559  | -1.453483 |
| 161 | 6 | 0 | -3.425442 | 8.734828  | -1.629562 |
| 162 | 1 | 0 | -3.459741 | 8.602220  | -2.719533 |
| 163 | 1 | 0 | -3.302521 | 9.807042  | -1.443803 |
| 164 | 6 | 0 | -2.232812 | 7.965849  | -1.061250 |
| 165 | 1 | 0 | -2.143690 | 8.150574  | 0.017262  |
| 166 | 1 | 0 | -1.294858 | 8.298576  | -1.519171 |
| 167 | 6 | 0 | -4.099629 | 3.744531  | -0.027828 |
| 168 | 1 | 0 | -4.141082 | 4.090829  | 1.017110  |
| 169 | 6 | 0 | 0.696687  | 0.883531  | -0.795303 |
| 170 | 1 | 0 | 0.414315  | 1.029887  | -1.842040 |
| 171 | 1 | 0 | 0.766744  | 1.856068  | -0.302498 |
| 172 | 6 | 0 | -0.289976 | 0.008412  | -0.074248 |
| 173 | 6 | 0 | -1.075054 | 0.534666  | 0.949643  |
| 174 | 6 | 0 | -0.449723 | -1.321632 | -0.450494 |
| 175 | 6 | 0 | -2.021782 | -0.262420 | 1.580261  |
| 176 | 1 | 0 | -0.930796 | 1.568448  | 1.256067  |
| 177 | 6 | 0 | -1.393009 | -2.124907 | 0.183572  |
| 178 | 1 | 0 | 0.180376  | -1.721259 | -1.236271 |
| 179 | 6 | 0 | -2.184409 | -1.592435 | 1.198436  |
| 180 | 1 | 0 | -2.639396 | 0.143775  | 2.377275  |
| 181 | 1 | 0 | -1.499417 | -3.165799 | -0.113034 |
| 182 | 1 | 0 | -2.913658 | -2.208619 | 1.721327  |
| 183 | 8 | 0 | 2.015310  | 0.318109  | -0.882002 |
| 184 | 6 | 0 | 2.723493  | 0.350281  | 0.257641  |
| 185 | 8 | 0 | 2.260910  | 0.666655  | 1.328742  |
| 186 | 6 | 0 | 4.163016  | 0.023513  | 0.037405  |
| 187 | 6 | 0 | 5.048846  | 0.256056  | 1.091267  |
| 188 | 6 | 0 | 4.636781  | -0.423654 | -1.197158 |
| 189 | 6 | 0 | 6.406355  | 0.005143  | 0.920680  |
| 190 | 1 | 0 | 4.657384  | 0.676017  | 2.013993  |
| 191 | 6 | 0 | 5.995093  | -0.680804 | -1.359653 |
| 192 | 1 | 0 | 3.956867  | -0.524011 | -2.037582 |
| 193 | 6 | 0 | 6.878418  | -0.474698 | -0.300710 |
| 194 | 1 | 0 | 7.098171  | 0.192411  | 1.736006  |
| 195 | 1 | 0 | 7.938361  | -0.671706 | -0.431421 |
| 196 | 1 | 0 | 6.360502  | -1.029014 | -2.321927 |

-----  
Benzylbenzoate@CC3-b C1 cc3-dpe999

Standard orientation:

-----  

| Center<br>Number | Atomic<br>Number | Atomic<br>Type | Coordinates (Angstroms) |   |   |
|------------------|------------------|----------------|-------------------------|---|---|
|                  |                  |                | X                       | Y | Z |

-----

|    |   |   |           |           |           |
|----|---|---|-----------|-----------|-----------|
| 1  | 7 | 0 | 2.295255  | 4.643011  | 2.576681  |
| 2  | 7 | 0 | 2.159242  | 2.691031  | 4.711012  |
| 3  | 7 | 0 | 3.377792  | -3.301019 | 2.705119  |
| 4  | 7 | 0 | 3.351252  | -4.142823 | -0.127177 |
| 5  | 6 | 0 | 1.933959  | 4.032262  | -0.225658 |
| 6  | 1 | 0 | 2.926251  | 3.887439  | 0.194754  |
| 7  | 6 | 0 | 0.893538  | 4.430497  | 0.626282  |
| 8  | 6 | 0 | 1.139217  | 4.693793  | 2.057807  |
| 9  | 1 | 0 | 0.250247  | 4.968074  | 2.647771  |
| 10 | 6 | 0 | 2.419203  | 4.996198  | 3.977809  |
| 11 | 1 | 0 | 1.431742  | 5.190940  | 4.434612  |
| 12 | 6 | 0 | 3.056678  | 3.829581  | 4.747320  |
| 13 | 1 | 0 | 4.022593  | 3.598731  | 4.263138  |
| 14 | 6 | 0 | 3.302029  | 4.220851  | 6.209499  |
| 15 | 1 | 0 | 3.768318  | 3.375411  | 6.727271  |
| 16 | 1 | 0 | 2.327981  | 4.389114  | 6.687220  |
| 17 | 6 | 0 | 4.165870  | 5.477448  | 6.319867  |
| 18 | 1 | 0 | 4.308147  | 5.742553  | 7.372888  |
| 19 | 1 | 0 | 5.162472  | 5.272644  | 5.905537  |
| 20 | 6 | 0 | 3.532115  | 6.639257  | 5.553033  |
| 21 | 1 | 0 | 4.169955  | 7.527998  | 5.604429  |
| 22 | 1 | 0 | 2.576886  | 6.905296  | 6.025885  |
| 23 | 6 | 0 | 3.287333  | 6.254626  | 4.093864  |
| 24 | 1 | 0 | 4.242465  | 6.059329  | 3.589155  |
| 25 | 1 | 0 | 2.800252  | 7.069787  | 3.547745  |
| 26 | 6 | 0 | 2.614541  | 1.594119  | 4.268203  |
| 27 | 1 | 0 | 3.648586  | 1.493884  | 3.902148  |
| 28 | 6 | 0 | 1.794798  | 0.367891  | 4.205453  |
| 29 | 6 | 0 | 0.432928  | 0.391188  | 4.531539  |
| 30 | 1 | 0 | -0.008062 | 1.333393  | 4.846942  |
| 31 | 6 | 0 | -0.331354 | -0.768284 | 4.463047  |
| 32 | 6 | 0 | 0.264100  | -1.965681 | 4.040378  |
| 33 | 1 | 0 | -0.352076 | -2.858612 | 3.966970  |
| 34 | 6 | 0 | 1.616719  | -2.000240 | 3.715450  |
| 35 | 6 | 0 | 2.381747  | -0.830057 | 3.818658  |
| 36 | 1 | 0 | 3.442674  | -0.873553 | 3.587226  |
| 37 | 6 | 0 | 2.220231  | -3.255975 | 3.225575  |
| 38 | 1 | 0 | 1.582039  | -4.150585 | 3.299409  |
| 39 | 6 | 0 | 3.864973  | -4.589020 | 2.240918  |
| 40 | 1 | 0 | 3.052490  | -5.338517 | 2.221917  |
| 41 | 6 | 0 | 4.416527  | -4.466550 | 0.811122  |
| 42 | 1 | 0 | 5.192870  | -3.680228 | 0.816594  |
| 43 | 6 | 0 | 5.051238  | -5.794226 | 0.370693  |
| 44 | 1 | 0 | 5.451995  | -5.667139 | -0.641017 |
| 45 | 1 | 0 | 4.255861  | -6.548554 | 0.304380  |
| 46 | 6 | 0 | 6.140005  | -6.261236 | 1.335991  |
| 47 | 1 | 0 | 6.966585  | -5.537756 | 1.331166  |
| 48 | 1 | 0 | 6.552941  | -7.218097 | 0.999533  |
| 49 | 6 | 0 | 5.586605  | -6.382395 | 2.755630  |
| 50 | 1 | 0 | 4.823941  | -7.172551 | 2.780914  |
| 51 | 1 | 0 | 6.375593  | -6.679740 | 3.454422  |
| 52 | 6 | 0 | 4.963691  | -5.060879 | 3.203264  |
| 53 | 1 | 0 | 5.734130  | -4.279308 | 3.252007  |
| 54 | 1 | 0 | 4.535747  | -5.147176 | 4.208125  |
| 55 | 6 | 0 | 3.630375  | -3.300999 | -1.037768 |
| 56 | 1 | 0 | 4.605701  | -2.788262 | -1.071887 |
| 57 | 7 | 0 | -2.896810 | 5.233818  | -1.158299 |
| 58 | 7 | 0 | -5.125519 | 3.394537  | -1.284301 |
| 59 | 7 | 0 | -4.828129 | -1.158296 | 3.286255  |

|     |   |   |           |           |           |
|-----|---|---|-----------|-----------|-----------|
| 60  | 7 | 0 | -2.483492 | -1.750259 | 4.935166  |
| 61  | 6 | 0 | -0.378185 | 4.633783  | 0.104297  |
| 62  | 1 | 0 | -1.196973 | 4.963821  | 0.738633  |
| 63  | 6 | 0 | -0.625742 | 4.439971  | -1.261949 |
| 64  | 6 | 0 | -1.955228 | 4.722732  | -1.837184 |
| 65  | 1 | 0 | -2.069324 | 4.491524  | -2.907928 |
| 66  | 6 | 0 | -4.135778 | 5.542874  | -1.844976 |
| 67  | 1 | 0 | -4.117561 | 5.192919  | -2.893091 |
| 68  | 6 | 0 | -5.297966 | 4.826399  | -1.139976 |
| 69  | 1 | 0 | -5.277744 | 5.132094  | -0.078248 |
| 70  | 6 | 0 | -6.639135 | 5.230331  | -1.762233 |
| 71  | 1 | 0 | -7.445522 | 4.714764  | -1.229334 |
| 72  | 1 | 0 | -6.658466 | 4.866731  | -2.797896 |
| 73  | 6 | 0 | -6.841220 | 6.745418  | -1.733890 |
| 74  | 1 | 0 | -7.797450 | 7.004402  | -2.200630 |
| 75  | 1 | 0 | -6.892779 | 7.087993  | -0.691377 |
| 76  | 6 | 0 | -5.686778 | 7.457592  | -2.440534 |
| 77  | 1 | 0 | -5.815793 | 8.543957  | -2.390729 |
| 78  | 1 | 0 | -5.691891 | 7.184874  | -3.504686 |
| 79  | 6 | 0 | -4.346771 | 7.061527  | -1.820364 |
| 80  | 1 | 0 | -4.300917 | 7.395803  | -0.775693 |
| 81  | 1 | 0 | -3.512596 | 7.540957  | -2.344106 |
| 82  | 6 | 0 | -4.993059 | 2.702570  | -0.230682 |
| 83  | 1 | 0 | -4.998164 | 3.157535  | 0.771924  |
| 84  | 6 | 0 | -4.845148 | 1.233894  | -0.269218 |
| 85  | 6 | 0 | -4.748113 | 0.559229  | -1.495238 |
| 86  | 1 | 0 | -4.755207 | 1.145287  | -2.410619 |
| 87  | 6 | 0 | -4.638202 | -0.825368 | -1.529360 |
| 88  | 6 | 0 | -4.646068 | -1.544455 | -0.325695 |
| 89  | 1 | 0 | -4.578238 | -2.627773 | -0.364458 |
| 90  | 6 | 0 | -4.715418 | -0.886774 | 0.894965  |
| 91  | 6 | 0 | -4.815576 | 0.511273  | 0.918022  |
| 92  | 1 | 0 | -4.877696 | 1.012840  | 1.880531  |
| 93  | 6 | 0 | -4.690716 | -1.680625 | 2.139371  |
| 94  | 1 | 0 | -4.552860 | -2.764866 | 2.003479  |
| 95  | 6 | 0 | -4.856966 | -2.051011 | 4.430378  |
| 96  | 1 | 0 | -4.602681 | -3.086793 | 4.142345  |
| 97  | 6 | 0 | -3.823911 | -1.589995 | 5.468013  |
| 98  | 1 | 0 | -4.042270 | -0.532157 | 5.701620  |
| 99  | 6 | 0 | -3.933338 | -2.426053 | 6.749445  |
| 100 | 1 | 0 | -3.195768 | -2.059299 | 7.471609  |
| 101 | 1 | 0 | -3.654156 | -3.459708 | 6.506880  |
| 102 | 6 | 0 | -5.344112 | -2.387949 | 7.335825  |
| 103 | 1 | 0 | -5.586137 | -1.361052 | 7.641944  |
| 104 | 1 | 0 | -5.391628 | -3.007826 | 8.237367  |
| 105 | 6 | 0 | -6.368002 | -2.859299 | 6.302688  |
| 106 | 1 | 0 | -6.179526 | -3.914659 | 6.062966  |
| 107 | 1 | 0 | -7.382857 | -2.802316 | 6.710295  |
| 108 | 6 | 0 | -6.270053 | -2.022040 | 5.027752  |
| 109 | 1 | 0 | -6.528127 | -0.976850 | 5.243017  |
| 110 | 1 | 0 | -6.978036 | -2.373886 | 4.269330  |
| 111 | 6 | 0 | -1.746242 | -0.720432 | 4.884018  |
| 112 | 1 | 0 | -2.112733 | 0.272009  | 5.190261  |
| 113 | 7 | 0 | 2.674122  | 3.257924  | -3.708644 |
| 114 | 7 | 0 | 3.433271  | 0.552354  | -4.485628 |
| 115 | 7 | 0 | -1.660905 | -3.399497 | -4.162594 |
| 116 | 7 | 0 | -4.225965 | -2.768178 | -2.887742 |
| 117 | 6 | 0 | 0.409464  | 4.033044  | -2.094326 |
| 118 | 1 | 0 | 0.246588  | 3.876173  | -3.157432 |

|     |   |   |           |           |           |
|-----|---|---|-----------|-----------|-----------|
| 119 | 6 | 0 | 1.697992  | 3.837797  | -1.580546 |
| 120 | 6 | 0 | 2.816019  | 3.463073  | -2.465809 |
| 121 | 1 | 0 | 3.798888  | 3.393189  | -1.973020 |
| 122 | 6 | 0 | 3.865910  | 2.958656  | -4.479519 |
| 123 | 1 | 0 | 4.732114  | 2.750700  | -3.822417 |
| 124 | 6 | 0 | 3.623865  | 1.709615  | -5.340249 |
| 125 | 1 | 0 | 2.728714  | 1.905893  | -5.957570 |
| 126 | 6 | 0 | 4.824252  | 1.445911  | -6.257668 |
| 127 | 1 | 0 | 4.613982  | 0.559455  | -6.866056 |
| 128 | 1 | 0 | 5.689166  | 1.200751  | -5.627122 |
| 129 | 6 | 0 | 5.142047  | 2.654293  | -7.138101 |
| 130 | 1 | 0 | 6.012972  | 2.441383  | -7.767099 |
| 131 | 1 | 0 | 4.298639  | 2.844347  | -7.815866 |
| 132 | 6 | 0 | 5.387597  | 3.896561  | -6.280894 |
| 133 | 1 | 0 | 5.580879  | 4.769709  | -6.913131 |
| 134 | 1 | 0 | 6.286958  | 3.740916  | -5.669434 |
| 135 | 6 | 0 | 4.192503  | 4.167024  | -5.367057 |
| 136 | 1 | 0 | 3.303219  | 4.399654  | -5.967479 |
| 137 | 1 | 0 | 4.376626  | 5.034183  | -4.723263 |
| 138 | 6 | 0 | 2.364808  | -0.116123 | -4.628657 |
| 139 | 1 | 0 | 1.587025  | 0.181983  | -5.348531 |
| 140 | 6 | 0 | 2.075582  | -1.334325 | -3.847233 |
| 141 | 6 | 0 | 2.998532  | -1.822837 | -2.913822 |
| 142 | 1 | 0 | 3.950134  | -1.309176 | -2.806564 |
| 143 | 6 | 0 | 2.682872  | -2.908216 | -2.101448 |
| 144 | 6 | 0 | 1.461176  | -3.571060 | -2.286155 |
| 145 | 1 | 0 | 1.225883  | -4.427253 | -1.658599 |
| 146 | 6 | 0 | 0.552494  | -3.119126 | -3.239477 |
| 147 | 6 | 0 | 0.858007  | -1.986699 | -4.007011 |
| 148 | 1 | 0 | 0.120953  | -1.629829 | -4.722220 |
| 149 | 6 | 0 | -0.734886 | -3.823835 | -3.404583 |
| 150 | 1 | 0 | -0.841923 | -4.746857 | -2.814474 |
| 151 | 6 | 0 | -2.846100 | -4.231881 | -4.281691 |
| 152 | 1 | 0 | -2.898184 | -4.973113 | -3.463154 |
| 153 | 6 | 0 | -4.112276 | -3.366877 | -4.206339 |
| 154 | 1 | 0 | -4.036436 | -2.593242 | -4.991133 |
| 155 | 6 | 0 | -5.363873 | -4.219146 | -4.456737 |
| 156 | 1 | 0 | -6.245562 | -3.570461 | -4.408984 |
| 157 | 1 | 0 | -5.455946 | -4.942370 | -3.635473 |
| 158 | 6 | 0 | -5.293280 | -4.952396 | -5.795837 |
| 159 | 1 | 0 | -5.277121 | -4.218828 | -6.613284 |
| 160 | 1 | 0 | -6.191074 | -5.563814 | -5.935074 |
| 161 | 6 | 0 | -4.034742 | -5.817203 | -5.870613 |
| 162 | 1 | 0 | -4.095465 | -6.609197 | -5.111789 |
| 163 | 1 | 0 | -3.965673 | -6.314325 | -6.843960 |
| 164 | 6 | 0 | -2.784504 | -4.973163 | -5.624724 |
| 165 | 1 | 0 | -2.669151 | -4.227438 | -6.422463 |
| 166 | 1 | 0 | -1.881871 | -5.593947 | -5.638114 |
| 167 | 6 | 0 | -4.473970 | -1.524877 | -2.819670 |
| 168 | 1 | 0 | -4.557896 | -0.898302 | -3.721126 |
| 169 | 6 | 0 | -0.105930 | -1.006942 | -0.448460 |
| 170 | 1 | 0 | -0.174704 | -0.828922 | -1.526927 |
| 171 | 1 | 0 | -0.729943 | -0.259117 | 0.056130  |
| 172 | 6 | 0 | -0.549620 | -2.407071 | -0.107444 |
| 173 | 6 | 0 | 0.233275  | -3.270014 | 0.655120  |
| 174 | 6 | 0 | -1.759541 | -2.865902 | -0.625158 |
| 175 | 6 | 0 | -0.200784 | -4.569967 | 0.909509  |
| 176 | 1 | 0 | 1.213780  | -2.947562 | 0.983942  |
| 177 | 6 | 0 | -2.202795 | -4.158537 | -0.361530 |

|     |   |   |           |           |           |
|-----|---|---|-----------|-----------|-----------|
| 178 | 1 | 0 | -2.341559 | -2.227684 | -1.282193 |
| 179 | 6 | 0 | -1.423938 | -5.016589 | 0.414098  |
| 180 | 1 | 0 | 0.438131  | -5.244953 | 1.473303  |
| 181 | 1 | 0 | -3.139567 | -4.493312 | -0.801473 |
| 182 | 1 | 0 | -1.756953 | -6.031244 | 0.611340  |
| 183 | 8 | 0 | 1.246599  | -0.832942 | -0.031933 |
| 184 | 6 | 0 | 1.984458  | 0.058399  | -0.714471 |
| 185 | 8 | 0 | 1.545188  | 0.777821  | -1.579881 |
| 186 | 6 | 0 | 3.414794  | 0.018433  | -0.294758 |
| 187 | 6 | 0 | 4.356368  | 0.672392  | -1.091470 |
| 188 | 6 | 0 | 3.822507  | -0.710436 | 0.820056  |
| 189 | 6 | 0 | 5.703526  | 0.618089  | -0.750417 |
| 190 | 1 | 0 | 4.019956  | 1.156310  | -2.003817 |
| 191 | 6 | 0 | 5.170112  | -0.755249 | 1.166247  |
| 192 | 1 | 0 | 3.094178  | -1.267363 | 1.395348  |
| 193 | 6 | 0 | 6.110268  | -0.085399 | 0.385068  |
| 194 | 1 | 0 | 6.439241  | 1.113727  | -1.376722 |
| 195 | 1 | 0 | 7.163303  | -0.124597 | 0.648309  |
| 196 | 1 | 0 | 5.472194  | -1.338605 | 2.032479  |

Tetrachloroethene@CC3 C1 cc3-dpel33

Standard orientation:

| Center<br>Number | Atomic<br>Number | Atomic<br>Type | Coordinates (Angstroms) |           |            |
|------------------|------------------|----------------|-------------------------|-----------|------------|
|                  |                  |                | X                       | Y         | Z          |
| 1                | 7                | 0              | 0.021525                | -0.935310 | -5.568524  |
| 2                | 7                | 0              | 2.214282                | 0.957789  | -5.206114  |
| 3                | 7                | 0              | 5.884667                | 0.051566  | 0.012937   |
| 4                | 7                | 0              | 5.154642                | -1.690581 | 2.227013   |
| 5                | 6                | 0              | -1.255960               | -2.515984 | -3.527304  |
| 6                | 1                | 0              | -0.345463               | -2.904874 | -3.977064  |
| 7                | 6                | 0              | -1.708494               | -1.249037 | -3.921608  |
| 8                | 6                | 0              | -0.994996               | -0.480397 | -4.962085  |
| 9                | 1                | 0              | -1.421111               | 0.507186  | -5.198824  |
| 10               | 6                | 0              | 0.580576                | -0.136600 | -6.643339  |
| 11               | 1                | 0              | 0.084268                | 0.848137  | -6.715405  |
| 12               | 6                | 0              | 2.071522                | 0.121618  | -6.382494  |
| 13               | 1                | 0              | 2.564206                | -0.857755 | -6.245925  |
| 14               | 6                | 0              | 2.709031                | 0.848165  | -7.574273  |
| 15               | 1                | 0              | 3.773286                | 1.000428  | -7.363164  |
| 16               | 1                | 0              | 2.253951                | 1.844438  | -7.650456  |
| 17               | 6                | 0              | 2.511744                | 0.079957  | -8.880798  |
| 18               | 1                | 0              | 2.962096                | 0.633382  | -9.711594  |
| 19               | 1                | 0              | 3.033770                | -0.884677 | -8.820122  |
| 20               | 6                | 0              | 1.025487                | -0.167962 | -9.140705  |
| 21               | 1                | 0              | 0.885805                | -0.747091 | -10.059616 |
| 22               | 1                | 0              | 0.519466                | 0.795396  | -9.291201  |
| 23               | 6                | 0              | 0.387051                | -0.899500 | -7.960199  |
| 24               | 1                | 0              | 0.835051                | -1.895372 | -7.847047  |
| 25               | 1                | 0              | -0.685525               | -1.050806 | -8.123688  |
| 26               | 6                | 0              | 3.022838                | 0.582118  | -4.304784  |
| 27               | 1                | 0              | 3.580728                | -0.364555 | -4.376563  |
| 28               | 6                | 0              | 3.262786                | 1.379047  | -3.084668  |
| 29               | 6                | 0              | 2.603273                | 2.601452  | -2.892868  |
| 30               | 1                | 0              | 1.944580                | 2.964179  | -3.678144  |
| 31               | 6                | 0              | 2.784217                | 3.323880  | -1.719341  |
| 32               | 6                | 0              | 3.632764                | 2.820288  | -0.723755  |



|    |   |   |           |           |           |
|----|---|---|-----------|-----------|-----------|
| 33 | 1 | 0 | 3.763838  | 3.398448  | 0.187358  |
| 34 | 6 | 0 | 4.296962  | 1.612927  | -0.906648 |
| 35 | 6 | 0 | 4.109778  | 0.894163  | -2.095600 |
| 36 | 1 | 0 | 4.629639  | -0.052642 | -2.217671 |
| 37 | 6 | 0 | 5.208088  | 1.115673  | 0.144369  |
| 38 | 1 | 0 | 5.277992  | 1.742129  | 1.047392  |
| 39 | 6 | 0 | 6.799410  | -0.302650 | 1.081658  |
| 40 | 1 | 0 | 6.713199  | 0.394588  | 1.934704  |
| 41 | 6 | 0 | 6.464170  | -1.707849 | 1.603338  |
| 42 | 1 | 0 | 6.493743  | -2.399938 | 0.742425  |
| 43 | 6 | 0 | 7.496299  | -2.153144 | 2.647317  |
| 44 | 1 | 0 | 7.239101  | -3.162577 | 2.986587  |
| 45 | 1 | 0 | 7.407440  | -1.492014 | 3.519274  |
| 46 | 6 | 0 | 8.920647  | -2.104906 | 2.094510  |
| 47 | 1 | 0 | 9.017643  | -2.825223 | 1.270804  |
| 48 | 1 | 0 | 9.632801  | -2.409853 | 2.868557  |
| 49 | 6 | 0 | 9.252552  | -0.704032 | 1.578688  |
| 50 | 1 | 0 | 9.245923  | 0.001791  | 2.420444  |
| 51 | 1 | 0 | 10.260603 | -0.679231 | 1.151463  |
| 52 | 6 | 0 | 8.230748  | -0.258372 | 0.532894  |
| 53 | 1 | 0 | 8.280368  | -0.913836 | -0.346377 |
| 54 | 1 | 0 | 8.442141  | 0.758153  | 0.183527  |
| 55 | 6 | 0 | 4.304871  | -2.548757 | 1.840906  |
| 56 | 1 | 0 | 4.528016  | -3.269157 | 1.038035  |
| 57 | 7 | 0 | -5.278279 | 0.220518  | -2.082765 |
| 58 | 7 | 0 | -5.431721 | 2.069268  | 0.163749  |
| 59 | 7 | 0 | -0.250105 | 5.845020  | 0.800508  |
| 60 | 7 | 0 | 2.292331  | 5.365657  | -0.540933 |
| 61 | 6 | 0 | -2.853759 | -0.720094 | -3.337597 |
| 62 | 1 | 0 | -3.218445 | 0.266288  | -3.612938 |
| 63 | 6 | 0 | -3.568359 | -1.453681 | -2.379758 |
| 64 | 6 | 0 | -4.789734 | -0.903832 | -1.757643 |
| 65 | 1 | 0 | -5.259668 | -1.543703 | -0.993770 |
| 66 | 6 | 0 | -6.527350 | 0.613847  | -1.455865 |
| 67 | 1 | 0 | -6.778211 | -0.048279 | -0.607683 |
| 68 | 6 | 0 | -6.410123 | 2.042856  | -0.906728 |
| 69 | 1 | 0 | -6.110298 | 2.698853  | -1.743854 |
| 70 | 6 | 0 | -7.758870 | 2.517365  | -0.350995 |
| 71 | 1 | 0 | -7.645292 | 3.542238  | 0.019115  |
| 72 | 1 | 0 | -8.011958 | 1.891999  | 0.515193  |
| 73 | 6 | 0 | -8.865443 | 2.432294  | -1.402299 |
| 74 | 1 | 0 | -9.817239 | 2.760266  | -0.971255 |
| 75 | 1 | 0 | -8.636862 | 3.118506  | -2.229121 |
| 76 | 6 | 0 | -8.983559 | 1.008881  | -1.948652 |
| 77 | 1 | 0 | -9.752410 | 0.957146  | -2.726781 |
| 78 | 1 | 0 | -9.302629 | 0.337126  | -1.140168 |
| 79 | 6 | 0 | -7.642870 | 0.531552  | -2.506315 |
| 80 | 1 | 0 | -7.350343 | 1.148049  | -3.366408 |
| 81 | 1 | 0 | -7.710830 | -0.501563 | -2.864526 |
| 82 | 6 | 0 | -4.505973 | 2.933192  | 0.096757  |
| 83 | 1 | 0 | -4.415830 | 3.627088  | -0.753893 |
| 84 | 6 | 0 | -3.467860 | 3.060095  | 1.139661  |
| 85 | 6 | 0 | -3.492480 | 2.237613  | 2.276179  |
| 86 | 1 | 0 | -4.310094 | 1.529482  | 2.385035  |
| 87 | 6 | 0 | -2.476044 | 2.308560  | 3.219262  |
| 88 | 6 | 0 | -1.425348 | 3.218956  | 3.033966  |
| 89 | 1 | 0 | -0.638956 | 3.261957  | 3.783162  |
| 90 | 6 | 0 | -1.396967 | 4.047627  | 1.919583  |
| 91 | 6 | 0 | -2.425363 | 3.962825  | 0.969395  |

|     |   |   |           |           |           |
|-----|---|---|-----------|-----------|-----------|
| 92  | 1 | 0 | -2.382122 | 4.611791  | 0.098330  |
| 93  | 6 | 0 | -0.298602 | 5.021989  | 1.763566  |
| 94  | 1 | 0 | 0.468763  | 5.003581  | 2.553120  |
| 95  | 6 | 0 | 0.837384  | 6.804678  | 0.785894  |
| 96  | 1 | 0 | 1.540178  | 6.633147  | 1.621244  |
| 97  | 6 | 0 | 1.633167  | 6.657949  | -0.519215 |
| 98  | 1 | 0 | 0.921488  | 6.764284  | -1.357764 |
| 99  | 6 | 0 | 2.705651  | 7.750232  | -0.622647 |
| 100 | 1 | 0 | 3.240077  | 7.628204  | -1.571154 |
| 101 | 1 | 0 | 3.438023  | 7.586649  | 0.178696  |
| 102 | 6 | 0 | 2.104231  | 9.150626  | -0.505823 |
| 103 | 1 | 0 | 1.429141  | 9.330850  | -1.353488 |
| 104 | 1 | 0 | 2.896804  | 9.904009  | -0.565119 |
| 105 | 6 | 0 | 1.320898  | 9.293783  | 0.799631  |
| 106 | 1 | 0 | 2.012730  | 9.202434  | 1.648044  |
| 107 | 1 | 0 | 0.863431  | 10.286374 | 0.868308  |
| 108 | 6 | 0 | 0.243922  | 8.213976  | 0.902057  |
| 109 | 1 | 0 | -0.494278 | 8.340964  | 0.099451  |
| 110 | 1 | 0 | -0.301051 | 8.288827  | 1.849362  |
| 111 | 6 | 0 | 2.103935  | 4.623744  | -1.551533 |
| 112 | 1 | 0 | 1.436632  | 4.920585  | -2.375815 |
| 113 | 7 | 0 | -1.878018 | -5.180143 | -1.123731 |
| 114 | 7 | 0 | 0.080702  | -5.511839 | 1.042620  |
| 115 | 7 | 0 | -0.253816 | -1.043257 | 5.660597  |
| 116 | 7 | 0 | -1.647560 | 1.497863  | 5.329036  |
| 117 | 6 | 0 | -3.116445 | -2.714461 | -2.006064 |
| 118 | 1 | 0 | -3.646316 | -3.300062 | -1.259284 |
| 119 | 6 | 0 | -1.944457 | -3.243962 | -2.563489 |
| 120 | 6 | 0 | -1.396491 | -4.535734 | -2.104029 |
| 121 | 1 | 0 | -0.514495 | -4.894743 | -2.658020 |
| 122 | 6 | 0 | -1.252295 | -6.448843 | -0.794177 |
| 123 | 1 | 0 | -0.303043 | -6.582900 | -1.343924 |
| 124 | 6 | 0 | -0.928574 | -6.502732 | 0.705731  |
| 125 | 1 | 0 | -1.869383 | -6.317110 | 1.254769  |
| 126 | 6 | 0 | -0.387332 | -7.887155 | 1.088754  |
| 127 | 1 | 0 | -0.183946 | -7.897162 | 2.165266  |
| 128 | 1 | 0 | 0.576017  | -8.030520 | 0.581784  |
| 129 | 6 | 0 | -1.355318 | -9.005250 | 0.702739  |
| 130 | 1 | 0 | -0.930275 | -9.977726 | 0.972898  |
| 131 | 1 | 0 | -2.287093 | -8.894825 | 1.273966  |
| 132 | 6 | 0 | -1.672733 | -8.951809 | -0.791868 |
| 133 | 1 | 0 | -2.393760 | -9.730721 | -1.061556 |
| 134 | 1 | 0 | -0.756594 | -9.153745 | -1.363388 |
| 135 | 6 | 0 | -2.219242 | -7.577541 | -1.176524 |
| 136 | 1 | 0 | -3.175482 | -7.395988 | -0.668353 |
| 137 | 1 | 0 | -2.415820 | -7.518887 | -2.252716 |
| 138 | 6 | 0 | -0.152725 | -4.767717 | 2.043199  |
| 139 | 1 | 0 | -1.103099 | -4.827371 | 2.598711  |
| 140 | 6 | 0 | 0.803890  | -3.760431 | 2.543187  |
| 141 | 6 | 0 | 2.092535  | -3.653325 | 2.004422  |
| 142 | 1 | 0 | 2.391282  | -4.353593 | 1.227892  |
| 143 | 6 | 0 | 2.959720  | -2.658073 | 2.439047  |
| 144 | 6 | 0 | 2.543292  | -1.768709 | 3.439344  |
| 145 | 1 | 0 | 3.234974  | -0.997181 | 3.767943  |
| 146 | 6 | 0 | 1.275284  | -1.878637 | 3.997613  |
| 147 | 6 | 0 | 0.407113  | -2.881031 | 3.543440  |
| 148 | 1 | 0 | -0.585697 | -2.944331 | 3.982082  |
| 149 | 6 | 0 | 0.866356  | -0.953246 | 5.073440  |
| 150 | 1 | 0 | 1.608754  | -0.188148 | 5.349968  |

|     |    |   |           |           |           |
|-----|----|---|-----------|-----------|-----------|
| 151 | 6  | 0 | -0.518834 | -0.128488 | 6.754834  |
| 152 | 1  | 0 | 0.287603  | 0.619656  | 6.860960  |
| 153 | 6  | 0 | -1.821932 | 0.636949  | 6.483828  |
| 154 | 1  | 0 | -2.619461 | -0.109082 | 6.315843  |
| 155 | 6  | 0 | -2.192762 | 1.512486  | 7.688141  |
| 156 | 1  | 0 | -3.133483 | 2.029506  | 7.468984  |
| 157 | 1  | 0 | -1.422193 | 2.286754  | 7.798074  |
| 158 | 6  | 0 | -2.301560 | 0.694029  | 8.974375  |
| 159 | 1  | 0 | -3.124921 | -0.027076 | 8.880416  |
| 160 | 1  | 0 | -2.548561 | 1.350324  | 9.815553  |
| 161 | 6  | 0 | -0.999788 | -0.061410 | 9.244321  |
| 162 | 1  | 0 | -0.194021 | 0.662106  | 9.428923  |
| 163 | 1  | 0 | -1.089591 | -0.674017 | 10.147626 |
| 164 | 6  | 0 | -0.630185 | -0.941760 | 8.050631  |
| 165 | 1  | 0 | -1.393766 | -1.716624 | 7.902999  |
| 166 | 1  | 0 | 0.319354  | -1.460400 | 8.222238  |
| 167 | 6  | 0 | -2.514876 | 1.431528  | 4.406616  |
| 168 | 1  | 0 | -3.356775 | 0.722707  | 4.447392  |
| 169 | 6  | 0 | -1.122974 | -0.903454 | -0.094510 |
| 170 | 6  | 0 | -0.006940 | -1.092224 | -0.809594 |
| 171 | 17 | 0 | 0.859829  | -2.575011 | -0.787980 |
| 172 | 17 | 0 | 0.676085  | 0.142791  | -1.784493 |
| 173 | 17 | 0 | -1.965353 | 0.589270  | -0.086240 |
| 174 | 17 | 0 | -1.799413 | -2.128537 | 0.904842  |

15-Crown-5@CC3 C1 cc3-crown

Standard orientation:

| Center<br>Number | Atomic<br>Number | Atomic<br>Type | Coordinates (Angstroms) |           |           |
|------------------|------------------|----------------|-------------------------|-----------|-----------|
|                  |                  |                | X                       | Y         | Z         |
| 1                | 7                | 0              | 0.551022                | -2.019222 | -5.332609 |
| 2                | 7                | 0              | -1.818560               | -0.174461 | -5.409004 |
| 3                | 7                | 0              | -1.168663               | 5.200939  | -2.051616 |
| 4                | 7                | 0              | 1.110823                | 5.692013  | -0.084735 |
| 5                | 6                | 0              | 2.716696                | -2.364635 | -3.429138 |
| 6                | 1                | 0              | 2.829761                | -1.588586 | -4.183107 |
| 7                | 6                | 0              | 1.578950                | -3.187517 | -3.484012 |
| 8                | 6                | 0              | 0.540725                | -2.990524 | -4.516707 |
| 9                | 1                | 0              | -0.257567               | -3.750883 | -4.530845 |
| 10               | 6                | 0              | -0.474836               | -2.008475 | -6.364803 |
| 11               | 1                | 0              | -1.317101               | -2.672369 | -6.099977 |
| 12               | 6                | 0              | -1.041174               | -0.595657 | -6.564893 |
| 13               | 1                | 0              | -0.188919               | 0.083435  | -6.745851 |
| 14               | 6                | 0              | -1.979836               | -0.557819 | -7.781939 |
| 15               | 1                | 0              | -2.339314               | 0.469615  | -7.906965 |
| 16               | 1                | 0              | -2.859041               | -1.174623 | -7.552595 |
| 17               | 6                | 0              | -1.306301               | -1.062035 | -9.056552 |
| 18               | 1                | 0              | -2.014766               | -1.031770 | -9.891219 |
| 19               | 1                | 0              | -0.473512               | -0.395837 | -9.319853 |
| 20               | 6                | 0              | -0.771980               | -2.478409 | -8.851041 |
| 21               | 1                | 0              | -0.259417               | -2.834732 | -9.750961 |
| 22               | 1                | 0              | -1.614169               | -3.160506 | -8.671549 |
| 23               | 6                | 0              | 0.180991                | -2.519100 | -7.658326 |
| 24               | 1                | 0              | 1.062638                | -1.896607 | -7.861116 |
| 25               | 1                | 0              | 0.546810                | -3.536738 | -7.481371 |
| 26               | 6                | 0              | -1.680420               | 1.030062  | -5.032888 |
| 27               | 1                | 0              | -0.942584               | 1.699994  | -5.503668 |

|    |   |   |           |            |           |
|----|---|---|-----------|------------|-----------|
| 28 | 6 | 0 | -2.479920 | 1.642098   | -3.952729 |
| 29 | 6 | 0 | -3.522731 | 0.943637   | -3.329737 |
| 30 | 1 | 0 | -3.748712 | -0.064202  | -3.668494 |
| 31 | 6 | 0 | -4.233457 | 1.521167   | -2.282684 |
| 32 | 6 | 0 | -3.878007 | 2.799406   | -1.826044 |
| 33 | 1 | 0 | -4.394795 | 3.204903   | -0.960255 |
| 34 | 6 | 0 | -2.835781 | 3.498040   | -2.425609 |
| 35 | 6 | 0 | -2.165609 | 2.924341   | -3.515726 |
| 36 | 1 | 0 | -1.338454 | 3.473244   | -3.960702 |
| 37 | 6 | 0 | -2.330196 | 4.744858   | -1.805086 |
| 38 | 1 | 0 | -3.004807 | 5.228480   | -1.080808 |
| 39 | 6 | 0 | -0.802582 | 6.479147   | -1.449275 |
| 40 | 1 | 0 | -1.325616 | 6.630445   | -0.489221 |
| 41 | 6 | 0 | 0.712174  | 6.571767   | -1.176678 |
| 42 | 1 | 0 | 1.238789  | 6.309991   | -2.110316 |
| 43 | 6 | 0 | 1.102205  | 8.000960   | -0.759000 |
| 44 | 1 | 0 | 2.187383  | 8.028948   | -0.609098 |
| 45 | 1 | 0 | 0.643943  | 8.205206   | 0.218218  |
| 46 | 6 | 0 | 0.662839  | 9.057053   | -1.769410 |
| 47 | 1 | 0 | 1.179420  | 8.890221   | -2.724345 |
| 48 | 1 | 0 | 0.953503  | 10.053125  | -1.418706 |
| 49 | 6 | 0 | -0.845477 | 8.978102   | -1.991690 |
| 50 | 1 | 0 | -1.363185 | 9.224556   | -1.054699 |
| 51 | 1 | 0 | -1.168210 | 9.712405   | -2.737548 |
| 52 | 6 | 0 | -1.240317 | 7.573501   | -2.439851 |
| 53 | 1 | 0 | -0.784456 | 7.349640   | -3.413867 |
| 54 | 1 | 0 | -2.324877 | 7.496366   | -2.575968 |
| 55 | 6 | 0 | 2.272731  | 5.179644   | -0.122448 |
| 56 | 1 | 0 | 2.947690  | 5.314118   | -0.981529 |
| 57 | 7 | 0 | 0.914748  | -5.761094  | -0.155448 |
| 58 | 7 | 0 | -0.738697 | -5.121885  | 2.257054  |
| 59 | 7 | 0 | -5.510636 | -0.841521  | 1.745041  |
| 60 | 7 | 0 | -5.833795 | 1.079303   | -0.523573 |
| 61 | 6 | 0 | 1.399509  | -4.164527  | -2.512886 |
| 62 | 1 | 0 | 0.514620  | -4.797524  | -2.516927 |
| 63 | 6 | 0 | 2.325118  | -4.311558  | -1.467859 |
| 64 | 6 | 0 | 2.051398  | -5.224805  | -0.340327 |
| 65 | 1 | 0 | 2.881860  | -5.367497  | 0.370794  |
| 66 | 6 | 0 | 0.757062  | -6.638203  | 0.993539  |
| 67 | 1 | 0 | 1.521028  | -6.429333  | 1.763579  |
| 68 | 6 | 0 | -0.624661 | -6.436198  | 1.635275  |
| 69 | 1 | 0 | -1.381875 | -6.567509  | 0.842017  |
| 70 | 6 | 0 | -0.866086 | -7.481553  | 2.737038  |
| 71 | 1 | 0 | -1.869321 | -7.323749  | 3.148333  |
| 72 | 1 | 0 | -0.155858 | -7.287979  | 3.552027  |
| 73 | 6 | 0 | -0.701869 | -8.912726  | 2.229239  |
| 74 | 1 | 0 | -0.864388 | -9.620220  | 3.049180  |
| 75 | 1 | 0 | -1.467512 | -9.122299  | 1.469992  |
| 76 | 6 | 0 | 0.683146  | -9.106338  | 1.614330  |
| 77 | 1 | 0 | 0.793287  | -10.121531 | 1.218843  |
| 78 | 1 | 0 | 1.446476  | -8.982653  | 2.394487  |
| 79 | 6 | 0 | 0.919442  | -8.085631  | 0.503081  |
| 80 | 1 | 0 | 0.206454  | -8.249819  | -0.315915 |
| 81 | 1 | 0 | 1.922394  | -8.194165  | 0.075436  |
| 82 | 6 | 0 | -1.868638 | -4.545228  | 2.179581  |
| 83 | 1 | 0 | -2.693752 | -4.969662  | 1.583486  |
| 84 | 6 | 0 | -2.173544 | -3.273464  | 2.867694  |
| 85 | 6 | 0 | -1.271271 | -2.725502  | 3.789809  |
| 86 | 1 | 0 | -0.381981 | -3.297414  | 4.043299  |

|     |   |   |            |           |           |
|-----|---|---|------------|-----------|-----------|
| 87  | 6 | 0 | -1.493039  | -1.469126 | 4.339310  |
| 88  | 6 | 0 | -2.663122  | -0.769169 | 4.006982  |
| 89  | 1 | 0 | -2.817230  | 0.217759  | 4.436776  |
| 90  | 6 | 0 | -3.592177  | -1.321978 | 3.133073  |
| 91  | 6 | 0 | -3.344697  | -2.585941 | 2.572359  |
| 92  | 1 | 0 | -4.065922  | -2.986328 | 1.862955  |
| 93  | 6 | 0 | -4.772627  | -0.526246 | 2.728989  |
| 94  | 1 | 0 | -4.959327  | 0.379717  | 3.327962  |
| 95  | 6 | 0 | -6.689584  | -0.019870 | 1.503859  |
| 96  | 1 | 0 | -6.598202  | 0.963451  | 1.997870  |
| 97  | 6 | 0 | -6.891193  | 0.230831  | 0.000302  |
| 98  | 1 | 0 | -6.904917  | -0.752894 | -0.502803 |
| 99  | 6 | 0 | -8.228468  | 0.943834  | -0.252040 |
| 100 | 1 | 0 | -8.345643  | 1.084396  | -1.332243 |
| 101 | 1 | 0 | -8.169306  | 1.945972  | 0.192998  |
| 102 | 6 | 0 | -9.414301  | 0.180306  | 0.334266  |
| 103 | 1 | 0 | -9.509833  | -0.791657 | -0.168616 |
| 104 | 1 | 0 | -10.343198 | 0.728930  | 0.145834  |
| 105 | 6 | 0 | -9.214489  | -0.045138 | 1.832200  |
| 106 | 1 | 0 | -9.206466  | 0.925556  | 2.346279  |
| 107 | 1 | 0 | -10.045729 | -0.621327 | 2.252323  |
| 108 | 6 | 0 | -7.895315  | -0.770159 | 2.092320  |
| 109 | 1 | 0 | -7.923666  | -1.773045 | 1.645771  |
| 110 | 1 | 0 | -7.727313  | -0.906748 | 3.166505  |
| 111 | 6 | 0 | -5.298694  | 0.737730  | -1.623434 |
| 112 | 1 | 0 | -5.578312  | -0.197992 | -2.134805 |
| 113 | 7 | 0 | 5.466333   | -1.410406 | -1.243542 |
| 114 | 7 | 0 | 5.693785   | 1.271773  | 0.159992  |
| 115 | 7 | 0 | 1.746564   | 2.082442  | 5.138049  |
| 116 | 7 | 0 | -0.574901  | 0.292202  | 5.711681  |
| 117 | 6 | 0 | 3.444643   | -3.490974 | -1.426979 |
| 118 | 1 | 0 | 4.153148   | -3.550613 | -0.604276 |
| 119 | 6 | 0 | 3.639586   | -2.498798 | -2.399516 |
| 120 | 6 | 0 | 4.745818   | -1.524198 | -2.282779 |
| 121 | 1 | 0 | 4.900628   | -0.882520 | -3.166249 |
| 122 | 6 | 0 | 6.593675   | -0.490261 | -1.316719 |
| 123 | 1 | 0 | 6.462225   | 0.242638  | -2.132852 |
| 124 | 6 | 0 | 6.765229   | 0.300523  | -0.008712 |
| 125 | 1 | 0 | 6.785418   | -0.424751 | 0.823891  |
| 126 | 6 | 0 | 8.083410   | 1.093774  | -0.020376 |
| 127 | 1 | 0 | 8.179918   | 1.611786  | 0.940366  |
| 128 | 1 | 0 | 8.003594   | 1.871464  | -0.791674 |
| 129 | 6 | 0 | 9.300444   | 0.213667  | -0.293821 |
| 130 | 1 | 0 | 10.208575  | 0.825736  | -0.304756 |
| 131 | 1 | 0 | 9.416722   | -0.517057 | 0.518113  |
| 132 | 6 | 0 | 9.129076   | -0.527334 | -1.617978 |
| 133 | 1 | 0 | 9.984850   | -1.183160 | -1.810393 |
| 134 | 1 | 0 | 9.093367   | 0.201313  | -2.439156 |
| 135 | 6 | 0 | 7.840178   | -1.345423 | -1.602766 |
| 136 | 1 | 0 | 7.900667   | -2.124218 | -0.830772 |
| 137 | 1 | 0 | 7.689726   | -1.860180 | -2.558210 |
| 138 | 6 | 0 | 5.234111   | 1.442812  | 1.330668  |
| 139 | 1 | 0 | 5.562978   | 0.821775  | 2.179987  |
| 140 | 6 | 0 | 4.190770   | 2.446422  | 1.642002  |
| 141 | 6 | 0 | 3.840125   | 3.440677  | 0.714174  |
| 142 | 1 | 0 | 4.378784   | 3.484124  | -0.229285 |
| 143 | 6 | 0 | 2.762989   | 4.286361  | 0.955189  |
| 144 | 6 | 0 | 2.049160   | 4.160963  | 2.155703  |
| 145 | 1 | 0 | 1.190405   | 4.808322  | 2.317168  |

|     |   |   |           |           |           |
|-----|---|---|-----------|-----------|-----------|
| 146 | 6 | 0 | 2.385112  | 3.180863  | 3.084529  |
| 147 | 6 | 0 | 3.466676  | 2.327399  | 2.824242  |
| 148 | 1 | 0 | 3.702327  | 1.551445  | 3.548711  |
| 149 | 6 | 0 | 1.570935  | 3.026031  | 4.307933  |
| 150 | 1 | 0 | 0.794540  | 3.793173  | 4.457575  |
| 151 | 6 | 0 | 0.952517  | 2.109460  | 6.356034  |
| 152 | 1 | 0 | 0.083182  | 2.783475  | 6.256023  |
| 153 | 6 | 0 | 0.420259  | 0.707921  | 6.686611  |
| 154 | 1 | 0 | 1.283102  | 0.018003  | 6.700954  |
| 155 | 6 | 0 | -0.258941 | 0.695554  | 8.064972  |
| 156 | 1 | 0 | -0.600763 | -0.324338 | 8.273459  |
| 157 | 1 | 0 | -1.156635 | 1.325213  | 8.007588  |
| 158 | 6 | 0 | 0.664480  | 1.202396  | 9.171145  |
| 159 | 1 | 0 | 1.523832  | 0.525480  | 9.271169  |
| 160 | 1 | 0 | 0.137602  | 1.192042  | 10.131151 |
| 161 | 6 | 0 | 1.165859  | 2.608161  | 8.844008  |
| 162 | 1 | 0 | 0.314006  | 3.301544  | 8.828355  |
| 163 | 1 | 0 | 1.852752  | 2.964927  | 9.618755  |
| 164 | 6 | 0 | 1.861310  | 2.622783  | 7.484132  |
| 165 | 1 | 0 | 2.757513  | 1.988932  | 7.513910  |
| 166 | 1 | 0 | 2.197137  | 3.632730  | 7.224094  |
| 167 | 6 | 0 | -0.487285 | -0.886530 | 5.252159  |
| 168 | 1 | 0 | 0.351185  | -1.551993 | 5.515711  |
| 169 | 8 | 0 | 2.403972  | -1.230050 | -0.208528 |
| 170 | 8 | 0 | 1.775045  | 2.237788  | -1.106187 |
| 171 | 8 | 0 | -0.220356 | -1.933438 | 0.946920  |
| 172 | 8 | 0 | -1.671962 | 2.116661  | 0.036370  |
| 173 | 8 | 0 | -1.877692 | -0.719395 | -0.934937 |
| 174 | 6 | 0 | 1.714966  | -0.226508 | -0.934718 |
| 175 | 6 | 0 | 2.119904  | -1.232939 | 1.172421  |
| 176 | 6 | 0 | 2.528257  | 1.064520  | -0.885273 |
| 177 | 6 | 0 | 1.030259  | -2.230044 | 1.537311  |
| 178 | 6 | 0 | 0.703466  | 2.362837  | -0.188770 |
| 179 | 6 | 0 | -0.404976 | -2.549524 | -0.316926 |
| 180 | 6 | 0 | -0.598118 | 2.026235  | -0.881332 |
| 181 | 6 | 0 | -1.739720 | -2.120834 | -0.894626 |
| 182 | 6 | 0 | -1.777566 | 0.966262  | 0.851256  |
| 183 | 6 | 0 | -2.531474 | -0.173929 | 0.205059  |
| 184 | 1 | 0 | 0.396242  | -2.260783 | -1.002010 |
| 185 | 1 | 0 | -1.801918 | -2.492648 | -1.925372 |
| 186 | 1 | 0 | 1.338463  | -3.250036 | 1.270875  |
| 187 | 1 | 0 | 1.830112  | -0.228540 | 1.518573  |
| 188 | 1 | 0 | -3.524064 | 0.176412  | -0.085643 |
| 189 | 1 | 0 | -0.792529 | 0.606381  | 1.179869  |
| 190 | 1 | 0 | -0.589743 | 1.058808  | -1.389631 |
| 191 | 1 | 0 | 1.586278  | -0.586998 | -1.960185 |
| 192 | 1 | 0 | 0.889897  | 1.756298  | 0.709736  |
| 193 | 1 | 0 | 3.337122  | 1.054471  | -1.622715 |
| 194 | 1 | 0 | -0.381652 | -3.645407 | -0.213702 |
| 195 | 1 | 0 | -2.566772 | -2.569232 | -0.324090 |
| 196 | 1 | 0 | -2.645812 | -0.949819 | 0.960709  |
| 197 | 1 | 0 | 0.887967  | -2.195296 | 2.622839  |
| 198 | 1 | 0 | -2.338515 | 1.268189  | 1.745059  |
| 199 | 1 | 0 | 3.044557  | -1.509005 | 1.696940  |
| 200 | 1 | 0 | -0.733195 | 2.796653  | -1.634143 |
| 201 | 1 | 0 | 0.716554  | -0.095691 | -0.510668 |
| 202 | 1 | 0 | 2.995859  | 1.101727  | 0.103169  |
| 203 | 1 | 0 | 0.621019  | 3.400180  | 0.131734  |

Mesitylene@CC3 C3 cc3-mes3

Standard orientation:

| Center<br>Number | Atomic<br>Number | Atomic<br>Type | Coordinates (Angstroms) |           |           |
|------------------|------------------|----------------|-------------------------|-----------|-----------|
|                  |                  |                | X                       | Y         | Z         |
| 1                | 7                | 0              | -4.112351               | -2.603183 | -3.074989 |
| 2                | 7                | 0              | -1.780943               | -4.332564 | -3.328210 |
| 3                | 7                | 0              | 1.708098                | -5.301978 | 1.956445  |
| 4                | 7                | 0              | 1.393197                | -3.444731 | 4.145144  |
| 5                | 6                | 0              | -4.558234               | -0.533082 | -1.132338 |
| 6                | 1                | 0              | -4.859440               | -1.546149 | -0.877203 |
| 7                | 6                | 0              | -3.929047               | -0.310716 | -2.365921 |
| 8                | 6                | 0              | -3.729624               | -1.419163 | -3.320502 |
| 9                | 1                | 0              | -3.253502               | -1.147064 | -4.275250 |
| 10               | 6                | 0              | -3.960162               | -3.593478 | -4.124152 |
| 11               | 1                | 0              | -3.425165               | -3.178164 | -4.997234 |
| 12               | 6                | 0              | -3.134225               | -4.776621 | -3.602044 |
| 13               | 1                | 0              | -3.629481               | -5.154903 | -2.689592 |
| 14               | 6                | 0              | -3.074372               | -5.896586 | -4.648959 |
| 15               | 1                | 0              | -2.495591               | -6.730693 | -4.237238 |
| 16               | 1                | 0              | -2.518436               | -5.521956 | -5.518389 |
| 17               | 6                | 0              | -4.469819               | -6.352226 | -5.075030 |
| 18               | 1                | 0              | -4.390990               | -7.136757 | -5.834987 |
| 19               | 1                | 0              | -4.989390               | -6.793878 | -4.213788 |
| 20               | 6                | 0              | -5.285004               | -5.170823 | -5.602334 |
| 21               | 1                | 0              | -6.295371               | -5.491368 | -5.877334 |
| 22               | 1                | 0              | -4.813086               | -4.785594 | -6.516474 |
| 23               | 6                | 0              | -5.356479               | -4.057129 | -4.557947 |
| 24               | 1                | 0              | -5.891694               | -4.409958 | -3.666713 |
| 25               | 1                | 0              | -5.910911               | -3.193006 | -4.939953 |
| 26               | 6                | 0              | -1.288158               | -4.607290 | -2.193027 |
| 27               | 1                | 0              | -1.867318               | -5.132314 | -1.416581 |
| 28               | 6                | 0              | 0.102261                | -4.269374 | -1.831234 |
| 29               | 6                | 0              | 0.917914                | -3.536812 | -2.705717 |
| 30               | 1                | 0              | 0.499661                | -3.209093 | -3.653877 |
| 31               | 6                | 0              | 2.233611                | -3.247297 | -2.365921 |
| 32               | 6                | 0              | 2.740779                | -3.681006 | -1.132338 |
| 33               | 1                | 0              | 3.768724                | -3.435324 | -0.877203 |
| 34               | 6                | 0              | 1.935684                | -4.392340 | -0.252791 |
| 35               | 6                | 0              | 0.615354                | -4.696601 | -0.614014 |
| 36               | 1                | 0              | 0.000000                | -5.251920 | 0.089600  |
| 37               | 6                | 0              | 2.439934                | -4.735480 | 1.090456  |
| 38               | 1                | 0              | 3.477766                | -4.436112 | 1.306116  |
| 39               | 6                | 0              | 2.273633                | -5.551518 | 3.266276  |
| 40               | 1                | 0              | 3.284080                | -5.114347 | 3.361375  |
| 41               | 6                | 0              | 1.376646                | -4.885218 | 4.320630  |
| 42               | 1                | 0              | 0.358579                | -5.295212 | 4.190418  |
| 43               | 6                | 0              | 1.876049                | -5.213887 | 5.732826  |
| 44               | 1                | 0              | 1.210327                | -4.738315 | 6.461247  |
| 45               | 1                | 0              | 2.866276                | -4.757647 | 5.861150  |
| 46               | 6                | 0              | 1.957062                | -6.722885 | 5.965691  |
| 47               | 1                | 0              | 0.948522                | -7.155014 | 5.911578  |
| 48               | 1                | 0              | 2.335747                | -6.926590 | 6.972883  |
| 49               | 6                | 0              | 2.845339                | -7.387852 | 4.912913  |
| 50               | 1                | 0              | 3.875930                | -7.025641 | 5.029034  |
| 51               | 1                | 0              | 2.871757                | -8.472670 | 5.060489  |
| 52               | 6                | 0              | 2.349214                | -7.063981 | 3.503521  |

|     |   |   |           |           |           |
|-----|---|---|-----------|-----------|-----------|
| 53  | 1 | 0 | 1.347275  | -7.485617 | 3.349670  |
| 54  | 1 | 0 | 3.001779  | -7.508727 | 2.744170  |
| 55  | 6 | 0 | 0.276198  | -2.859703 | 4.000902  |
| 56  | 1 | 0 | -0.670937 | -3.421458 | 3.963058  |
| 57  | 7 | 0 | -2.861639 | 3.708624  | -3.328210 |
| 58  | 7 | 0 | -0.198247 | 4.862993  | -3.074989 |
| 59  | 7 | 0 | 4.642582  | 0.623940  | -3.328210 |
| 60  | 7 | 0 | 4.310599  | -2.259809 | -3.074989 |
| 61  | 6 | 0 | -3.521926 | 0.973469  | -2.705717 |
| 62  | 1 | 0 | -3.028987 | 1.171828  | -3.653877 |
| 63  | 6 | 0 | -3.748517 | 2.046126  | -1.831234 |
| 64  | 6 | 0 | -3.345951 | 3.419222  | -2.193027 |
| 65  | 1 | 0 | -3.511055 | 4.183302  | -1.416581 |
| 66  | 6 | 0 | -2.569562 | 5.102629  | -3.602044 |
| 67  | 1 | 0 | -2.649537 | 5.720674  | -2.689592 |
| 68  | 6 | 0 | -1.131963 | 5.226340  | -4.124152 |
| 69  | 1 | 0 | -1.039788 | 4.555362  | -4.997234 |
| 70  | 6 | 0 | -0.835338 | 6.667412  | -4.557947 |
| 71  | 1 | 0 | 0.190231  | 6.715502  | -4.939953 |
| 72  | 1 | 0 | -0.873289 | 7.307336  | -3.666713 |
| 73  | 6 | 0 | -1.835562 | 7.162359  | -5.602334 |
| 74  | 1 | 0 | -1.607979 | 8.197635  | -5.877334 |
| 75  | 1 | 0 | -1.737903 | 6.561052  | -6.516474 |
| 76  | 6 | 0 | -3.266280 | 7.047090  | -5.075030 |
| 77  | 1 | 0 | -3.985117 | 7.371087  | -5.834987 |
| 78  | 1 | 0 | -3.388976 | 7.717877  | -4.213788 |
| 79  | 6 | 0 | -3.569407 | 5.610777  | -4.648959 |
| 80  | 1 | 0 | -3.522936 | 4.942008  | -5.518389 |
| 81  | 1 | 0 | -4.581155 | 5.526592  | -4.237238 |
| 82  | 6 | 0 | 0.635781  | 3.939531  | -3.320502 |
| 83  | 1 | 0 | 0.633364  | 3.391147  | -4.275250 |
| 84  | 6 | 0 | 1.695436  | 3.558012  | -2.365921 |
| 85  | 6 | 0 | 1.817455  | 4.214087  | -1.132338 |
| 86  | 1 | 0 | 1.090716  | 4.981473  | -0.877203 |
| 87  | 6 | 0 | 2.836036  | 3.872522  | -0.252791 |
| 88  | 6 | 0 | 3.759698  | 2.881213  | -0.614014 |
| 89  | 1 | 0 | 4.548296  | 2.625960  | 0.089600  |
| 90  | 6 | 0 | 3.646255  | 2.223248  | -1.831234 |
| 91  | 6 | 0 | 2.604012  | 2.563343  | -2.705717 |
| 92  | 1 | 0 | 2.529326  | 2.037266  | -3.653877 |
| 93  | 6 | 0 | 4.634109  | 1.188067  | -2.193027 |
| 94  | 1 | 0 | 5.378373  | 0.949012  | -1.416581 |
| 95  | 6 | 0 | 5.703787  | -0.326009 | -3.602044 |
| 96  | 1 | 0 | 6.279017  | -0.565771 | -2.689592 |
| 97  | 6 | 0 | 5.092125  | -1.632862 | -4.124152 |
| 98  | 1 | 0 | 4.464953  | -1.377198 | -4.997234 |
| 99  | 6 | 0 | 6.191817  | -2.610282 | -4.557947 |
| 100 | 1 | 0 | 5.720680  | -3.522496 | -4.939953 |
| 101 | 1 | 0 | 6.764983  | -2.897378 | -3.666713 |
| 102 | 6 | 0 | 7.120566  | -1.991536 | -5.602334 |
| 103 | 1 | 0 | 6.550989  | -1.775458 | -6.516474 |
| 104 | 1 | 0 | 7.903350  | -2.706267 | -5.877334 |
| 105 | 6 | 0 | 7.736099  | -0.694863 | -5.075030 |
| 106 | 1 | 0 | 8.378366  | -0.924000 | -4.213788 |
| 107 | 1 | 0 | 8.376108  | -0.234331 | -5.834987 |
| 108 | 6 | 0 | 6.643779  | 0.285808  | -4.648959 |
| 109 | 1 | 0 | 6.041373  | 0.579949  | -5.518389 |
| 110 | 1 | 0 | 7.076746  | 1.204101  | -4.237238 |
| 111 | 6 | 0 | 3.093843  | -2.520368 | -3.320502 |



|     |   |   |           |           |           |
|-----|---|---|-----------|-----------|-----------|
| 112 | 1 | 0 | 2.620137  | -2.244083 | -4.275250 |
| 113 | 7 | 0 | -5.445696 | 1.171733  | 1.956445  |
| 114 | 7 | 0 | -3.679823 | 0.515821  | 4.145144  |
| 115 | 7 | 0 | 2.286625  | 2.928910  | 4.145144  |
| 116 | 7 | 0 | 3.737598  | 4.130245  | 1.956445  |
| 117 | 6 | 0 | -4.375053 | 1.815388  | -0.614014 |
| 118 | 1 | 0 | -4.548296 | 2.625960  | 0.089600  |
| 119 | 6 | 0 | -4.771720 | 0.519818  | -0.252791 |
| 120 | 6 | 0 | -5.321013 | 0.254695  | 1.090456  |
| 121 | 1 | 0 | -5.580669 | -0.793778 | 1.306116  |
| 122 | 6 | 0 | -5.944572 | 0.806735  | 3.266276  |
| 123 | 1 | 0 | -6.071195 | -0.286923 | 3.361375  |
| 124 | 6 | 0 | -4.919046 | 1.250399  | 4.320630  |
| 125 | 1 | 0 | -4.765078 | 2.337068  | 4.190418  |
| 126 | 6 | 0 | -5.453383 | 0.982238  | 5.732826  |
| 127 | 1 | 0 | -4.708665 | 1.320984  | 6.461247  |
| 128 | 1 | 0 | -5.553382 | -0.103445 | 5.861150  |
| 129 | 6 | 0 | -6.800720 | 1.666577  | 5.965691  |
| 130 | 1 | 0 | -7.166476 | 1.440478  | 6.972883  |
| 131 | 1 | 0 | -6.670684 | 2.756063  | 5.911578  |
| 132 | 6 | 0 | -7.820737 | 1.229790  | 4.912913  |
| 133 | 1 | 0 | -8.773426 | 1.749320  | 5.060489  |
| 134 | 1 | 0 | -8.022348 | 0.156167  | 5.029034  |
| 135 | 6 | 0 | -7.292194 | 1.497512  | 3.503521  |
| 136 | 1 | 0 | -7.156372 | 2.576034  | 3.349670  |
| 137 | 1 | 0 | -8.003637 | 1.154747  | 2.744170  |
| 138 | 6 | 0 | -2.614675 | 1.190657  | 4.000902  |
| 139 | 1 | 0 | -2.627601 | 2.291777  | 3.963058  |
| 140 | 6 | 0 | -1.276679 | 0.572106  | 3.931925  |
| 141 | 6 | 0 | -1.123787 | -0.821541 | 3.929940  |
| 142 | 1 | 0 | -2.016209 | -1.442696 | 3.942892  |
| 143 | 6 | 0 | 0.142881  | -1.391689 | 3.931925  |
| 144 | 6 | 0 | 1.273369  | -0.562457 | 3.929940  |
| 145 | 1 | 0 | 2.257516  | -1.024740 | 3.942892  |
| 146 | 6 | 0 | 1.133797  | 0.819583  | 3.931925  |
| 147 | 6 | 0 | -0.149582 | 1.383999  | 3.929940  |
| 148 | 1 | 0 | -0.241307 | 2.467437  | 3.942892  |
| 149 | 6 | 0 | 2.338476  | 1.669046  | 4.000902  |
| 150 | 1 | 0 | 3.298538  | 1.129681  | 3.963058  |
| 151 | 6 | 0 | 3.542400  | 3.634820  | 4.320630  |
| 152 | 1 | 0 | 4.406499  | 2.958144  | 4.190418  |
| 153 | 6 | 0 | 3.670939  | 4.744783  | 3.266276  |
| 154 | 1 | 0 | 2.787115  | 5.401270  | 3.361375  |
| 155 | 6 | 0 | 4.942980  | 5.566469  | 3.503521  |
| 156 | 1 | 0 | 5.001859  | 6.353980  | 2.744170  |
| 157 | 1 | 0 | 5.809097  | 4.909583  | 3.349670  |
| 158 | 6 | 0 | 4.975398  | 6.158062  | 4.912913  |
| 159 | 1 | 0 | 4.146419  | 6.869474  | 5.029034  |
| 160 | 1 | 0 | 5.901669  | 6.723350  | 5.060489  |
| 161 | 6 | 0 | 4.843658  | 5.056307  | 5.965691  |
| 162 | 1 | 0 | 5.722163  | 4.398951  | 5.911578  |
| 163 | 1 | 0 | 4.830729  | 5.486111  | 6.972883  |
| 164 | 6 | 0 | 3.577334  | 4.231649  | 5.732826  |
| 165 | 1 | 0 | 2.687105  | 4.861092  | 5.861150  |
| 166 | 1 | 0 | 3.498338  | 3.417332  | 6.461247  |
| 167 | 6 | 0 | 2.881079  | 4.480784  | 1.090456  |
| 168 | 1 | 0 | 2.102902  | 5.229890  | 1.306116  |
| 169 | 6 | 0 | 0.428402  | -1.316724 | 0.478193  |
| 170 | 6 | 0 | -0.936895 | -1.044380 | 0.476472  |

|     |   |   |           |           |           |
|-----|---|---|-----------|-----------|-----------|
| 171 | 6 | 0 | -1.354517 | 0.287355  | 0.478193  |
| 172 | 6 | 0 | -0.436012 | 1.333565  | 0.476472  |
| 173 | 6 | 0 | 0.926115  | 1.029369  | 0.478193  |
| 174 | 6 | 0 | 1.372907  | -0.289185 | 0.476472  |
| 175 | 1 | 0 | 0.763660  | -2.347901 | 0.534546  |
| 176 | 1 | 0 | -2.415172 | 0.512602  | 0.534546  |
| 177 | 1 | 0 | 1.651512  | 1.835299  | 0.534546  |
| 178 | 6 | 0 | -0.900366 | 2.768296  | 0.503253  |
| 179 | 1 | 0 | -0.912517 | 3.204649  | -0.505147 |
| 180 | 1 | 0 | -1.913921 | 2.844742  | 0.912772  |
| 181 | 1 | 0 | -0.232903 | 3.383802  | 1.118088  |
| 182 | 6 | 0 | -1.947232 | -2.163888 | 0.503253  |
| 183 | 1 | 0 | -2.814006 | -1.893601 | 1.118088  |
| 184 | 1 | 0 | -2.319049 | -2.392587 | -0.505147 |
| 185 | 1 | 0 | -1.506658 | -3.079875 | 0.912772  |
| 186 | 6 | 0 | 2.847597  | -0.604408 | 0.503253  |
| 187 | 1 | 0 | 3.046910  | -1.490201 | 1.118088  |
| 188 | 1 | 0 | 3.231566  | -0.812062 | -0.505147 |
| 189 | 1 | 0 | 3.420579  | 0.235134  | 0.912772  |

Mesitylene@CC3 C1 cc3-mes4

Standard orientation:

| Center<br>Number | Atomic<br>Number | Atomic<br>Type | Coordinates (Angstroms) |           |           |
|------------------|------------------|----------------|-------------------------|-----------|-----------|
|                  |                  |                | X                       | Y         | Z         |
| 1                | 7                | 0              | -5.592959               | 1.716192  | -0.324888 |
| 2                | 7                | 0              | -5.708199               | -1.201068 | -0.220560 |
| 3                | 7                | 0              | -1.511838               | -3.980700 | 3.765668  |
| 4                | 7                | 0              | 0.855741                | -2.569069 | 4.763034  |
| 5                | 6                | 0              | -3.358209               | 3.432251  | 0.281064  |
| 6                | 1                | 0              | -4.038530               | 3.179309  | 1.090618  |
| 7                | 6                | 0              | -3.607180               | 2.904342  | -0.994953 |
| 8                | 6                | 0              | -4.782680               | 2.046259  | -1.243031 |
| 9                | 1                | 0              | -4.923914               | 1.723846  | -2.286429 |
| 10               | 6                | 0              | -6.762202               | 0.945382  | -0.705573 |
| 11               | 1                | 0              | -6.721714               | 0.650545  | -1.769684 |
| 12               | 6                | 0              | -6.827306               | -0.343179 | 0.124748  |
| 13               | 1                | 0              | -6.801893               | -0.055452 | 1.191331  |
| 14               | 6                | 0              | -8.127410               | -1.105833 | -0.163445 |
| 15               | 1                | 0              | -8.149597               | -2.006665 | 0.459657  |
| 16               | 1                | 0              | -8.102159               | -1.442144 | -1.208248 |
| 17               | 6                | 0              | -9.362308               | -0.238080 | 0.078672  |
| 18               | 1                | 0              | -10.269599              | -0.805389 | -0.154312 |
| 19               | 1                | 0              | -9.418165               | 0.029633  | 1.142591  |
| 20               | 6                | 0              | -9.295792               | 1.039790  | -0.758413 |
| 21               | 1                | 0              | -10.164424              | 1.676680  | -0.560485 |
| 22               | 1                | 0              | -9.330479               | 0.775816  | -1.824198 |
| 23               | 6                | 0              | -8.007526               | 1.808339  | -0.465734 |
| 24               | 1                | 0              | -7.996793               | 2.141074  | 0.580450  |
| 25               | 1                | 0              | -7.935549               | 2.708379  | -1.086064 |
| 26               | 6                | 0              | -5.016033               | -1.671167 | 0.732166  |
| 27               | 1                | 0              | -5.220766               | -1.411023 | 1.783193  |
| 28               | 6                | 0              | -3.902795               | -2.617083 | 0.521456  |
| 29               | 6                | 0              | -3.517473               | -3.013125 | -0.768857 |
| 30               | 1                | 0              | -4.048919               | -2.596786 | -1.620785 |
| 31               | 6                | 0              | -2.482472               | -3.922825 | -0.943687 |
| 32               | 6                | 0              | -1.812782               | -4.433250 | 0.177646  |

|    |   |   |           |           |           |
|----|---|---|-----------|-----------|-----------|
| 33 | 1 | 0 | -0.997535 | -5.134495 | 0.019101  |
| 34 | 6 | 0 | -2.168159 | -4.028308 | 1.455206  |
| 35 | 6 | 0 | -3.230396 | -3.128151 | 1.623447  |
| 36 | 1 | 0 | -3.495923 | -2.820631 | 2.632248  |
| 37 | 6 | 0 | -1.364417 | -4.476041 | 2.607670  |
| 38 | 1 | 0 | -0.600469 | -5.240058 | 2.391832  |
| 39 | 6 | 0 | -0.670595 | -4.491899 | 4.830955  |
| 40 | 1 | 0 | 0.161801  | -5.099604 | 4.432587  |
| 41 | 6 | 0 | -0.065843 | -3.312556 | 5.604041  |
| 42 | 1 | 0 | -0.906415 | -2.677761 | 5.938520  |
| 43 | 6 | 0 | 0.710428  | -3.810160 | 6.830763  |
| 44 | 1 | 0 | 1.109675  | -2.942751 | 7.367504  |
| 45 | 1 | 0 | 1.573467  | -4.389094 | 6.476731  |
| 46 | 6 | 0 | -0.159173 | -4.671423 | 7.745870  |
| 47 | 1 | 0 | -0.976974 | -4.062141 | 8.154215  |
| 48 | 1 | 0 | 0.429872  | -5.025054 | 8.598664  |
| 49 | 6 | 0 | -0.748639 | -5.851311 | 6.972643  |
| 50 | 1 | 0 | 0.066207  | -6.508623 | 6.639961  |
| 51 | 1 | 0 | -1.397840 | -6.451851 | 7.618590  |
| 52 | 6 | 0 | -1.533636 | -5.359376 | 5.757146  |
| 53 | 1 | 0 | -2.394257 | -4.760127 | 6.082340  |
| 54 | 1 | 0 | -1.932188 | -6.200004 | 5.178318  |
| 55 | 6 | 0 | 0.660606  | -1.319877 | 4.649388  |
| 56 | 1 | 0 | -0.215786 | -0.828864 | 5.101741  |
| 57 | 7 | 0 | -0.924728 | 4.023707  | -4.133109 |
| 58 | 7 | 0 | 1.353510  | 2.402443  | -4.906508 |
| 59 | 7 | 0 | 0.851671  | -3.898223 | -3.999300 |
| 60 | 7 | 0 | -1.196966 | -5.245748 | -2.473632 |
| 61 | 6 | 0 | -2.745242 | 3.205545  | -2.042664 |
| 62 | 1 | 0 | -2.916979 | 2.809401  | -3.040214 |
| 63 | 6 | 0 | -1.630931 | 4.029898  | -1.831305 |
| 64 | 6 | 0 | -0.711232 | 4.371578  | -2.933211 |
| 65 | 1 | 0 | 0.172641  | 4.962936  | -2.646050 |
| 66 | 6 | 0 | 0.033472  | 4.445774  | -5.135956 |
| 67 | 1 | 0 | 0.886712  | 4.980964  | -4.681271 |
| 68 | 6 | 0 | 0.591617  | 3.203961  | -5.846293 |
| 69 | 1 | 0 | -0.269837 | 2.641678  | -6.249844 |
| 70 | 6 | 0 | 1.515312  | 3.611936  | -6.999844 |
| 71 | 1 | 0 | 1.882144  | 2.705948  | -7.494352 |
| 72 | 1 | 0 | 2.390792  | 4.119200  | -6.574009 |
| 73 | 6 | 0 | 0.806204  | 4.532312  | -7.993464 |
| 74 | 1 | 0 | 1.495668  | 4.820839  | -8.793884 |
| 75 | 1 | 0 | -0.022471 | 3.989001  | -8.467801 |
| 76 | 6 | 0 | 0.255146  | 5.770708  | -7.285061 |
| 77 | 1 | 0 | -0.281298 | 6.412689  | -7.991709 |
| 78 | 1 | 0 | 1.091814  | 6.362517  | -6.889376 |
| 79 | 6 | 0 | -0.671272 | 5.368599  | -6.137402 |
| 80 | 1 | 0 | -1.549766 | 4.839752  | -6.529543 |
| 81 | 1 | 0 | -1.042963 | 6.249701  | -5.603074 |
| 82 | 6 | 0 | 0.988512  | 1.200187  | -4.733939 |
| 83 | 1 | 0 | 0.102384  | 0.784330  | -5.238425 |
| 84 | 6 | 0 | 1.742126  | 0.249168  | -3.893580 |
| 85 | 6 | 0 | 2.888014  | 0.649459  | -3.191296 |
| 86 | 1 | 0 | 3.186638  | 1.694114  | -3.234245 |
| 87 | 6 | 0 | 3.638868  | -0.279671 | -2.481773 |
| 88 | 6 | 0 | 3.240978  | -1.625407 | -2.464949 |
| 89 | 1 | 0 | 3.849546  | -2.339950 | -1.915815 |
| 90 | 6 | 0 | 2.107795  | -2.031652 | -3.158382 |
| 91 | 6 | 0 | 1.356854  | -1.084531 | -3.868507 |

|     |   |   |           |           |           |
|-----|---|---|-----------|-----------|-----------|
| 92  | 1 | 0 | 0.483956  | -1.424288 | -4.419583 |
| 93  | 6 | 0 | 1.747422  | -3.463121 | -3.214234 |
| 94  | 1 | 0 | 2.331742  | -4.132833 | -2.563502 |
| 95  | 6 | 0 | 0.632207  | -5.329621 | -4.061696 |
| 96  | 1 | 0 | 1.202189  | -5.863283 | -3.279769 |
| 97  | 6 | 0 | -0.858034 | -5.624525 | -3.829540 |
| 98  | 1 | 0 | -1.431173 | -5.039975 | -4.571792 |
| 99  | 6 | 0 | -1.148248 | -7.117511 | -4.018490 |
| 100 | 1 | 0 | -2.218283 | -7.292265 | -3.861984 |
| 101 | 1 | 0 | -0.617274 | -7.670718 | -3.232844 |
| 102 | 6 | 0 | -0.705921 | -7.609438 | -5.396916 |
| 103 | 1 | 0 | -1.294802 | -7.101490 | -6.172822 |
| 104 | 1 | 0 | -0.909259 | -8.681015 | -5.494853 |
| 105 | 6 | 0 | 0.778893  | -7.320123 | -5.623311 |
| 106 | 1 | 0 | 1.373360  | -7.900004 | -4.904176 |
| 107 | 1 | 0 | 1.086498  | -7.643551 | -6.623323 |
| 108 | 6 | 0 | 1.072838  | -5.831100 | -5.442573 |
| 109 | 1 | 0 | 0.541588  | -5.245890 | -6.204499 |
| 110 | 1 | 0 | 2.140754  | -5.621463 | -5.568074 |
| 111 | 6 | 0 | -2.080146 | -4.353505 | -2.297766 |
| 112 | 1 | 0 | -2.593275 | -3.860855 | -3.137926 |
| 113 | 7 | 0 | -0.839217 | 5.309881  | 2.118719  |
| 114 | 7 | 0 | 0.935174  | 3.799991  | 3.851543  |
| 115 | 7 | 0 | 5.721815  | 0.180929  | 1.523116  |
| 116 | 7 | 0 | 5.655800  | -0.654485 | -1.216892 |
| 117 | 6 | 0 | -1.389247 | 4.539952  | -0.563571 |
| 118 | 1 | 0 | -0.522694 | 5.166661  | -0.368956 |
| 119 | 6 | 0 | -2.249008 | 4.238419  | 0.501564  |
| 120 | 6 | 0 | -1.915802 | 4.689100  | 1.867870  |
| 121 | 1 | 0 | -2.636343 | 4.420703  | 2.656782  |
| 122 | 6 | 0 | -0.573444 | 5.693391  | 3.490566  |
| 123 | 1 | 0 | -1.274804 | 5.203769  | 4.189946  |
| 124 | 6 | 0 | 0.846982  | 5.248672  | 3.864787  |
| 125 | 1 | 0 | 1.539441  | 5.701674  | 3.132172  |
| 126 | 6 | 0 | 1.211577  | 5.742229  | 5.271210  |
| 127 | 1 | 0 | 2.234571  | 5.424047  | 5.500130  |
| 128 | 1 | 0 | 0.553318  | 5.240625  | 5.992668  |
| 129 | 6 | 0 | 1.067955  | 7.259236  | 5.393570  |
| 130 | 1 | 0 | 1.314835  | 7.578109  | 6.411750  |
| 131 | 1 | 0 | 1.787068  | 7.749179  | 4.723062  |
| 132 | 6 | 0 | -0.347588 | 7.700765  | 5.020280  |
| 133 | 1 | 0 | -0.438409 | 8.790718  | 5.075193  |
| 134 | 1 | 0 | -1.058986 | 7.284738  | 5.746579  |
| 135 | 6 | 0 | -0.712523 | 7.215989  | 3.616992  |
| 136 | 1 | 0 | -0.054280 | 7.683869  | 2.873149  |
| 137 | 1 | 0 | -1.738600 | 7.498352  | 3.356528  |
| 138 | 6 | 0 | 1.927013  | 3.279810  | 3.254613  |
| 139 | 1 | 0 | 2.665734  | 3.893318  | 2.713324  |
| 140 | 6 | 0 | 2.203752  | 1.830711  | 3.279524  |
| 141 | 6 | 0 | 1.311456  | 0.940375  | 3.892404  |
| 142 | 1 | 0 | 0.391625  | 1.336073  | 4.315973  |
| 143 | 6 | 0 | 1.600215  | -0.416521 | 3.957723  |
| 144 | 6 | 0 | 2.792172  | -0.896137 | 3.397873  |
| 145 | 1 | 0 | 3.004694  | -1.961081 | 3.456387  |
| 146 | 6 | 0 | 3.670267  | -0.026283 | 2.764216  |
| 147 | 6 | 0 | 3.375432  | 1.343611  | 2.714956  |
| 148 | 1 | 0 | 4.078995  | 2.010263  | 2.222173  |
| 149 | 6 | 0 | 4.879201  | -0.560843 | 2.113600  |
| 150 | 1 | 0 | 4.998545  | -1.655326 | 2.156655  |

|     |   |   |           |           |           |
|-----|---|---|-----------|-----------|-----------|
| 151 | 6 | 0 | 6.856797  | -0.460788 | 0.892344  |
| 152 | 1 | 0 | 6.797083  | -1.561446 | 0.974269  |
| 153 | 6 | 0 | 6.851625  | -0.109035 | -0.603800 |
| 154 | 1 | 0 | 6.876762  | 0.993067  | -0.681462 |
| 155 | 6 | 0 | 8.086838  | -0.694317 | -1.296790 |
| 156 | 1 | 0 | 8.062711  | -0.418830 | -2.356794 |
| 157 | 1 | 0 | 8.020964  | -1.789123 | -1.250085 |
| 158 | 6 | 0 | 9.379226  | -0.215082 | -0.633801 |
| 159 | 1 | 0 | 9.469882  | 0.872778  | -0.756885 |
| 160 | 1 | 0 | 10.244681 | -0.663661 | -1.132896 |
| 161 | 6 | 0 | 9.384619  | -0.553764 | 0.858074  |
| 162 | 1 | 0 | 9.391502  | -1.645545 | 0.979867  |
| 163 | 1 | 0 | 10.295386 | -0.175848 | 1.334494  |
| 164 | 6 | 0 | 8.151412  | 0.026122  | 1.551508  |
| 165 | 1 | 0 | 8.170320  | 1.122710  | 1.503225  |
| 166 | 1 | 0 | 8.131954  | -0.245536 | 2.612569  |
| 167 | 6 | 0 | 4.864489  | 0.157964  | -1.784667 |
| 168 | 1 | 0 | 5.061916  | 1.241494  | -1.807879 |
| 169 | 6 | 0 | -0.562358 | -0.968972 | 1.481323  |
| 170 | 6 | 0 | -1.123596 | 0.304810  | 1.500297  |
| 171 | 6 | 0 | -0.403569 | 1.358717  | 0.936593  |
| 172 | 6 | 0 | 0.835143  | 1.152341  | 0.334680  |
| 173 | 6 | 0 | 1.364604  | -0.138981 | 0.313311  |
| 174 | 6 | 0 | 0.680816  | -1.206295 | 0.890218  |
| 175 | 1 | 0 | -1.075350 | -1.786272 | 1.978780  |
| 176 | 1 | 0 | -0.788946 | 2.369830  | 1.010579  |
| 177 | 1 | 0 | 2.351796  | -0.303572 | -0.115089 |
| 178 | 6 | 0 | 1.598904  | 2.310670  | -0.254433 |
| 179 | 1 | 0 | 1.328145  | 2.469744  | -1.306911 |
| 180 | 1 | 0 | 1.380265  | 3.238197  | 0.288558  |
| 181 | 1 | 0 | 2.679450  | 2.129531  | -0.214449 |
| 182 | 6 | 0 | -2.471519 | 0.549467  | 2.131346  |
| 183 | 1 | 0 | -2.479125 | 1.491219  | 2.692756  |
| 184 | 1 | 0 | -3.261647 | 0.618297  | 1.371259  |
| 185 | 1 | 0 | -2.737717 | -0.260478 | 2.819210  |
| 186 | 6 | 0 | 1.285359  | -2.586202 | 0.925433  |
| 187 | 1 | 0 | 1.150433  | -3.040879 | 1.915635  |
| 188 | 1 | 0 | 0.813151  | -3.244738 | 0.185323  |
| 189 | 1 | 0 | 2.358224  | -2.550442 | 0.705727  |

Mesitylene@CC3-TS C1 cc3-mes3tu

Standard orientation:

| Center<br>Number | Atomic<br>Number | Atomic<br>Type | Coordinates (Angstroms) |           |           |
|------------------|------------------|----------------|-------------------------|-----------|-----------|
|                  |                  |                | X                       | Y         | Z         |
| 1                | 7                | 0              | -6.316287               | 0.267514  | -0.963637 |
| 2                | 7                | 0              | -5.360677               | 2.713889  | 0.280405  |
| 3                | 7                | 0              | 0.071907                | 5.633841  | -1.503604 |
| 4                | 7                | 0              | 2.330471                | 4.630504  | -3.048305 |
| 5                | 6                | 0              | -4.535659               | -1.614525 | -2.179709 |
| 6                | 1                | 0              | -4.761983               | -0.697636 | -2.717486 |
| 7                | 6                | 0              | -5.045391               | -1.770208 | -0.882673 |
| 8                | 6                | 0              | -5.910475               | -0.729029 | -0.293357 |
| 9                | 1                | 0              | -6.189634               | -0.876262 | 0.761771  |
| 10               | 6                | 0              | -7.195653               | 1.216059  | -0.309709 |
| 11               | 1                | 0              | -7.291782               | 1.002872  | 0.770309  |
| 12               | 6                | 0              | -6.609289               | 2.627419  | -0.453323 |

|    |   |   |            |           |           |
|----|---|---|------------|-----------|-----------|
| 13 | 1 | 0 | -6.459045  | 2.816419  | -1.531614 |
| 14 | 6 | 0 | -7.577565  | 3.673657  | 0.113601  |
| 15 | 1 | 0 | -7.137792  | 4.668068  | -0.020244 |
| 16 | 1 | 0 | -7.665908  | 3.507692  | 1.195218  |
| 17 | 6 | 0 | -8.954117  | 3.587839  | -0.545487 |
| 18 | 1 | 0 | -9.626133  | 4.332637  | -0.106246 |
| 19 | 1 | 0 | -8.863927  | 3.830443  | -1.613080 |
| 20 | 6 | 0 | -9.537603  | 2.182114  | -0.397112 |
| 21 | 1 | 0 | -10.508553 | 2.112671  | -0.898806 |
| 22 | 1 | 0 | -9.713366  | 1.974546  | 0.667208  |
| 23 | 6 | 0 | -8.578829  | 1.137265  | -0.967640 |
| 24 | 1 | 0 | -8.453249  | 1.290176  | -2.047518 |
| 25 | 1 | 0 | -8.974352  | 0.124377  | -0.834146 |
| 26 | 6 | 0 | -4.343409  | 3.157841  | -0.332775 |
| 27 | 1 | 0 | -4.379263  | 3.433097  | -1.398602 |
| 28 | 6 | 0 | -3.052845  | 3.394014  | 0.346490  |
| 29 | 6 | 0 | -2.871383  | 3.021588  | 1.685919  |
| 30 | 1 | 0 | -3.684871  | 2.514033  | 2.197867  |
| 31 | 6 | 0 | -1.690381  | 3.329472  | 2.349660  |
| 32 | 6 | 0 | -0.670633  | 4.007747  | 1.667256  |
| 33 | 1 | 0 | 0.239116   | 4.256610  | 2.207812  |
| 34 | 6 | 0 | -0.836644  | 4.376444  | 0.337748  |
| 35 | 6 | 0 | -2.033587  | 4.061572  | -0.322164 |
| 36 | 1 | 0 | -2.154192  | 4.376179  | -1.355661 |
| 37 | 6 | 0 | 0.216091   | 5.165258  | -0.334285 |
| 38 | 1 | 0 | 1.121610   | 5.356064  | 0.262632  |
| 39 | 6 | 0 | 1.122975   | 6.482838  | -2.031655 |
| 40 | 1 | 0 | 1.974271   | 6.559930  | -1.331515 |
| 41 | 6 | 0 | 1.655311   | 5.879302  | -3.341720 |
| 42 | 1 | 0 | 0.786362   | 5.725631  | -4.006751 |
| 43 | 6 | 0 | 2.653683   | 6.829323  | -4.012201 |
| 44 | 1 | 0 | 2.995183   | 6.376674  | -4.949403 |
| 45 | 1 | 0 | 3.533275   | 6.912099  | -3.360550 |
| 46 | 6 | 0 | 2.050893   | 8.212447  | -4.254877 |
| 47 | 1 | 0 | 1.213940   | 8.129568  | -4.961653 |
| 48 | 1 | 0 | 2.794442   | 8.869029  | -4.718902 |
| 49 | 6 | 0 | 1.544068   | 8.813829  | -2.943534 |
| 50 | 1 | 0 | 2.395053   | 8.976572  | -2.268126 |
| 51 | 1 | 0 | 1.085919   | 9.792978  | -3.118713 |
| 52 | 6 | 0 | 0.535508   | 7.878318  | -2.277588 |
| 53 | 1 | 0 | -0.350785  | 7.765944  | -2.915549 |
| 54 | 1 | 0 | 0.188926   | 8.286759  | -1.322010 |
| 55 | 6 | 0 | 1.820593   | 3.558775  | -3.494708 |
| 56 | 1 | 0 | 0.886182   | 3.555838  | -4.076995 |
| 57 | 7 | 0 | -3.055061  | -4.842622 | 1.352543  |
| 58 | 7 | 0 | -0.317218  | -4.521413 | 2.634359  |
| 59 | 7 | 0 | 0.735974   | 1.096383  | 5.507405  |
| 60 | 7 | 0 | -0.592884  | 3.430579  | 4.489034  |
| 61 | 6 | 0 | -4.691183  | -2.888153 | -0.130884 |
| 62 | 1 | 0 | -5.001316  | -2.981604 | 0.907014  |
| 63 | 6 | 0 | -3.900557  | -3.894599 | -0.696516 |
| 64 | 6 | 0 | -3.281300  | -4.966792 | 0.110759  |
| 65 | 1 | 0 | -2.898758  | -5.825776 | -0.465488 |
| 66 | 6 | 0 | -2.303401  | -5.922336 | 1.983292  |
| 67 | 1 | 0 | -1.658320  | -6.433958 | 1.247189  |
| 68 | 6 | 0 | -1.408076  | -5.376764 | 3.106565  |
| 69 | 1 | 0 | -2.068870  | -4.822472 | 3.797175  |
| 70 | 6 | 0 | -0.747684  | -6.533609 | 3.875396  |
| 71 | 1 | 0 | -0.139091  | -6.107596 | 4.680355  |

|     |   |   |           |           |           |
|-----|---|---|-----------|-----------|-----------|
| 72  | 1 | 0 | -0.055628 | -7.045161 | 3.193375  |
| 73  | 6 | 0 | -1.766676 | -7.526864 | 4.429718  |
| 74  | 1 | 0 | -1.250868 | -8.339282 | 4.952598  |
| 75  | 1 | 0 | -2.403467 | -7.024121 | 5.170289  |
| 76  | 6 | 0 | -2.641151 | -8.076873 | 3.304830  |
| 77  | 1 | 0 | -3.399167 | -8.761512 | 3.700076  |
| 78  | 1 | 0 | -2.017019 | -8.656441 | 2.611109  |
| 79  | 6 | 0 | -3.314259 | -6.933462 | 2.549231  |
| 80  | 1 | 0 | -3.998134 | -6.392786 | 3.217442  |
| 81  | 1 | 0 | -3.919914 | -7.314245 | 1.718945  |
| 82  | 6 | 0 | -0.162863 | -3.444046 | 3.290221  |
| 83  | 1 | 0 | -0.903198 | -3.148376 | 4.052033  |
| 84  | 6 | 0 | 0.981284  | -2.503739 | 3.217054  |
| 85  | 6 | 0 | 2.199874  | -2.772576 | 2.570357  |
| 86  | 1 | 0 | 2.307821  | -3.698406 | 2.009456  |
| 87  | 6 | 0 | 3.242079  | -1.842024 | 2.620448  |
| 88  | 6 | 0 | 3.068345  | -0.644735 | 3.323681  |
| 89  | 1 | 0 | 3.889988  | 0.066912  | 3.344008  |
| 90  | 6 | 0 | 1.875163  | -0.376125 | 3.982179  |
| 91  | 6 | 0 | 0.838771  | -1.312111 | 3.925495  |
| 92  | 1 | 0 | -0.083758 | -1.091045 | 4.456230  |
| 93  | 6 | 0 | 1.728788  | 0.874645  | 4.750505  |
| 94  | 1 | 0 | 2.548278  | 1.602011  | 4.637229  |
| 95  | 6 | 0 | 0.710183  | 2.348832  | 6.236015  |
| 96  | 1 | 0 | 1.552081  | 3.003524  | 5.946099  |
| 97  | 6 | 0 | -0.590549 | 3.092335  | 5.898955  |
| 98  | 1 | 0 | -1.429735 | 2.420023  | 6.153867  |
| 99  | 6 | 0 | -0.703736 | 4.378785  | 6.724121  |
| 100 | 1 | 0 | -1.643978 | 4.880529  | 6.470620  |
| 101 | 1 | 0 | 0.108752  | 5.052812  | 6.422943  |
| 102 | 6 | 0 | -0.621227 | 4.090860  | 8.223602  |
| 103 | 1 | 0 | -1.482209 | 3.478759  | 8.525021  |
| 104 | 1 | 0 | -0.684049 | 5.026729  | 8.788845  |
| 105 | 6 | 0 | 0.669687  | 3.343634  | 8.563144  |
| 106 | 1 | 0 | 1.529200  | 3.993767  | 8.350069  |
| 107 | 1 | 0 | 0.707838  | 3.107586  | 9.631848  |
| 108 | 6 | 0 | 0.787624  | 2.060707  | 7.739373  |
| 109 | 1 | 0 | -0.024114 | 1.368539  | 7.998531  |
| 110 | 1 | 0 | 1.728549  | 1.541389  | 7.951683  |
| 111 | 6 | 0 | -1.552912 | 2.999335  | 3.782239  |
| 112 | 1 | 0 | -2.356912 | 2.378740  | 4.207665  |
| 113 | 7 | 0 | -1.894613 | -2.940702 | -4.250618 |
| 114 | 7 | 0 | 0.682579  | -1.365321 | -4.790885 |
| 115 | 7 | 0 | 5.875686  | -0.352785 | -1.097576 |
| 116 | 7 | 0 | 5.364082  | -1.136850 | 1.710260  |
| 117 | 6 | 0 | -3.471045 | -3.765356 | -2.012825 |
| 118 | 1 | 0 | -2.830190 | -4.521104 | -2.459773 |
| 119 | 6 | 0 | -3.713347 | -2.589263 | -2.732227 |
| 120 | 6 | 0 | -2.977573 | -2.331188 | -3.989833 |
| 121 | 1 | 0 | -3.391923 | -1.559232 | -4.657058 |
| 122 | 6 | 0 | -1.265975 | -2.705803 | -5.542230 |
| 123 | 1 | 0 | -1.618079 | -1.763772 | -5.998121 |
| 124 | 6 | 0 | 0.264486  | -2.619304 | -5.412681 |
| 125 | 1 | 0 | 0.603365  | -3.489949 | -4.824977 |
| 126 | 6 | 0 | 0.930069  | -2.652208 | -6.801741 |
| 127 | 1 | 0 | 2.016279  | -2.640457 | -6.658164 |
| 128 | 1 | 0 | 0.672257  | -1.718376 | -7.319510 |
| 129 | 6 | 0 | 0.503817  | -3.847804 | -7.648603 |
| 130 | 1 | 0 | 0.998482  | -3.807415 | -8.624921 |

|     |   |   |           |           |           |
|-----|---|---|-----------|-----------|-----------|
| 131 | 1 | 0 | 0.827436  | -4.778727 | -7.163515 |
| 132 | 6 | 0 | -1.014077 | -3.864056 | -7.807855 |
| 133 | 1 | 0 | -1.336247 | -4.730956 | -8.394480 |
| 134 | 1 | 0 | -1.331428 | -2.968283 | -8.358714 |
| 135 | 6 | 0 | -1.681637 | -3.888249 | -6.436145 |
| 136 | 1 | 0 | -1.417883 | -4.816087 | -5.911014 |
| 137 | 1 | 0 | -2.773476 | -3.878428 | -6.528298 |
| 138 | 6 | 0 | 1.784793  | -1.381909 | -4.159209 |
| 139 | 1 | 0 | 2.341768  | -2.317006 | -3.983083 |
| 140 | 6 | 0 | 2.435472  | -0.158703 | -3.638560 |
| 141 | 6 | 0 | 1.837798  | 1.098334  | -3.794040 |
| 142 | 1 | 0 | 0.888040  | 1.160066  | -4.319565 |
| 143 | 6 | 0 | 2.449026  | 2.239841  | -3.286083 |
| 144 | 6 | 0 | 3.650760  | 2.122964  | -2.572473 |
| 145 | 1 | 0 | 4.084393  | 3.021606  | -2.140512 |
| 146 | 6 | 0 | 4.253435  | 0.881229  | -2.398565 |
| 147 | 6 | 0 | 3.656816  | -0.251993 | -2.976872 |
| 148 | 1 | 0 | 4.142376  | -1.216231 | -2.856324 |
| 149 | 6 | 0 | 5.405011  | 0.765838  | -1.474917 |
| 150 | 1 | 0 | 5.766811  | 1.716930  | -1.052182 |
| 151 | 6 | 0 | 6.906095  | -0.373344 | -0.071814 |
| 152 | 1 | 0 | 6.966181  | 0.598282  | 0.450152  |
| 153 | 6 | 0 | 6.585634  | -1.455079 | 0.985229  |
| 154 | 1 | 0 | 6.494925  | -2.420629 | 0.455075  |
| 155 | 6 | 0 | 7.733792  | -1.552809 | 2.000602  |
| 156 | 1 | 0 | 7.486467  | -2.333456 | 2.728344  |
| 157 | 1 | 0 | 7.782356  | -0.606075 | 2.554888  |
| 158 | 6 | 0 | 9.075640  | -1.838073 | 1.327252  |
| 159 | 1 | 0 | 9.038578  | -2.823667 | 0.843645  |
| 160 | 1 | 0 | 9.869985  | -1.883009 | 2.079808  |
| 161 | 6 | 0 | 9.389602  | -0.773820 | 0.276072  |
| 162 | 1 | 0 | 9.522715  | 0.196954  | 0.772575  |
| 163 | 1 | 0 | 10.331026 | -1.001349 | -0.235017 |
| 164 | 6 | 0 | 8.254678  | -0.671104 | -0.741895 |
| 165 | 1 | 0 | 8.159971  | -1.613201 | -1.298425 |
| 166 | 1 | 0 | 8.458057  | 0.113551  | -1.479113 |
| 167 | 6 | 0 | 4.517485  | -2.067401 | 1.896317  |
| 168 | 1 | 0 | 4.667996  | -3.081309 | 1.492772  |
| 169 | 6 | 0 | 0.600411  | -1.266928 | -0.071408 |
| 170 | 6 | 0 | 0.477798  | -2.582621 | -0.517287 |
| 171 | 6 | 0 | 1.608606  | -3.295085 | -0.910177 |
| 172 | 6 | 0 | 2.866117  | -2.703304 | -0.871915 |
| 173 | 6 | 0 | 2.954871  | -1.385855 | -0.429173 |
| 174 | 6 | 0 | 1.843757  | -0.648905 | -0.026974 |
| 175 | 1 | 0 | -0.291068 | -0.724827 | 0.239531  |
| 176 | 1 | 0 | 1.496025  | -4.321484 | -1.257986 |
| 177 | 1 | 0 | 3.928581  | -0.926731 | -0.381327 |
| 178 | 6 | 0 | 4.098533  | -3.459339 | -1.306621 |
| 179 | 1 | 0 | 4.329512  | -4.283250 | -0.619554 |
| 180 | 1 | 0 | 3.957380  | -3.908145 | -2.297482 |
| 181 | 1 | 0 | 4.967767  | -2.795515 | -1.350536 |
| 182 | 6 | 0 | -0.865715 | -3.207000 | -0.670795 |
| 183 | 1 | 0 | -1.618867 | -2.711662 | -0.052283 |
| 184 | 1 | 0 | -1.167711 | -3.128315 | -1.719954 |
| 185 | 1 | 0 | -0.840446 | -4.265164 | -0.393335 |
| 186 | 6 | 0 | 2.006885  | 0.779522  | 0.425094  |
| 187 | 1 | 0 | 3.024180  | 0.952656  | 0.794904  |
| 188 | 1 | 0 | 1.828064  | 1.474775  | -0.404653 |
| 189 | 1 | 0 | 1.301811  | 1.026838  | 1.225545  |



-----  
5-tBu-m-xylene@CC3 C1 cc3-dpell

Standard orientation:

| Center<br>Number | Atomic<br>Number | Atomic<br>Type | Coordinates (Angstroms) |           |           |
|------------------|------------------|----------------|-------------------------|-----------|-----------|
|                  |                  |                | X                       | Y         | Z         |
| 1                | 7                | 0              | -0.566848               | -5.051391 | -1.962392 |
| 2                | 7                | 0              | -1.604961               | -5.251932 | 0.770368  |
| 3                | 7                | 0              | -5.049361               | -0.180018 | 2.749995  |
| 4                | 7                | 0              | -4.942271               | 2.468012  | 1.468808  |
| 5                | 6                | 0              | 0.060421                | -2.688418 | -3.564883 |
| 6                | 1                | 0              | -0.967069               | -3.044139 | -3.593965 |
| 7                | 6                | 0              | 1.003258                | -3.415621 | -2.826204 |
| 8                | 6                | 0              | 0.625370                | -4.625639 | -2.069949 |
| 9                | 1                | 0              | 1.466141                | -5.151645 | -1.588560 |
| 10               | 6                | 0              | -0.747619               | -6.312383 | -1.258177 |
| 11               | 1                | 0              | 0.158234                | -6.575534 | -0.682105 |
| 12               | 6                | 0              | -1.911087               | -6.232573 | -0.260191 |
| 13               | 1                | 0              | -2.820964               | -5.944960 | -0.816043 |
| 14               | 6                | 0              | -2.140504               | -7.599648 | 0.399962  |
| 15               | 1                | 0              | -2.981156               | -7.514686 | 1.097968  |
| 16               | 1                | 0              | -1.253320               | -7.846908 | 0.998321  |
| 17               | 6                | 0              | -2.398606               | -8.693601 | -0.636053 |
| 18               | 1                | 0              | -2.538776               | -9.657545 | -0.135576 |
| 19               | 1                | 0              | -3.332035               | -8.473103 | -1.171434 |
| 20               | 6                | 0              | -1.248601               | -8.769887 | -1.640622 |
| 21               | 1                | 0              | -1.455683               | -9.525429 | -2.405813 |
| 22               | 1                | 0              | -0.334585               | -9.085996 | -1.119728 |
| 23               | 6                | 0              | -1.012250               | -7.410250 | -2.297973 |
| 24               | 1                | 0              | -1.888978               | -7.118118 | -2.891065 |
| 25               | 1                | 0              | -0.161862               | -7.450755 | -2.987399 |
| 26               | 6                | 0              | -2.573082               | -4.577838 | 1.239539  |
| 27               | 1                | 0              | -3.603840               | -4.710153 | 0.876556  |
| 28               | 6                | 0              | -2.364340               | -3.517479 | 2.247158  |
| 29               | 6                | 0              | -1.192204               | -3.502239 | 3.012278  |
| 30               | 1                | 0              | -0.477250               | -4.311348 | 2.886099  |
| 31               | 6                | 0              | -0.954957               | -2.479349 | 3.921713  |
| 32               | 6                | 0              | -1.883513               | -1.438871 | 4.043996  |
| 33               | 1                | 0              | -1.677433               | -0.640093 | 4.751781  |
| 34               | 6                | 0              | -3.045004               | -1.431741 | 3.278857  |
| 35               | 6                | 0              | -3.295485               | -2.492394 | 2.395285  |
| 36               | 1                | 0              | -4.219792               | -2.485013 | 1.821492  |
| 37               | 6                | 0              | -3.994619               | -0.311832 | 3.442093  |
| 38               | 1                | 0              | -3.728615               | 0.410224  | 4.230016  |
| 39               | 6                | 0              | -5.930435               | 0.924134  | 3.093304  |
| 40               | 1                | 0              | -5.483763               | 1.561023  | 3.878291  |
| 41               | 6                | 0              | -6.181248               | 1.821080  | 1.873425  |
| 42               | 1                | 0              | -6.581399               | 1.186579  | 1.062527  |
| 43               | 6                | 0              | -7.208569               | 2.910628  | 2.213750  |
| 44               | 1                | 0              | -7.379147               | 3.519522  | 1.318758  |
| 45               | 1                | 0              | -6.767048               | 3.573568  | 2.969799  |
| 46               | 6                | 0              | -8.519245               | 2.321055  | 2.733305  |
| 47               | 1                | 0              | -8.990235               | 1.724516  | 1.940236  |
| 48               | 1                | 0              | -9.218232               | 3.126169  | 2.983512  |
| 49               | 6                | 0              | -8.264958               | 1.429752  | 3.948903  |
| 50               | 1                | 0              | -7.880086               | 2.044682  | 4.773846  |
| 51               | 1                | 0              | -9.199413               | 0.978169  | 4.298406  |

|     |   |   |           |           |           |
|-----|---|---|-----------|-----------|-----------|
| 52  | 6 | 0 | -7.250116 | 0.337686  | 3.611760  |
| 53  | 1 | 0 | -7.655501 | -0.328427 | 2.838876  |
| 54  | 1 | 0 | -7.036761 | -0.285129 | 4.487309  |
| 55  | 6 | 0 | -4.740355 | 2.577352  | 0.221669  |
| 56  | 1 | 0 | -5.448381 | 2.168700  | -0.516018 |
| 57  | 7 | 0 | 5.007417  | -1.943653 | -2.774604 |
| 58  | 7 | 0 | 5.841581  | -0.134779 | -0.696699 |
| 59  | 7 | 0 | 2.952501  | -0.404970 | 5.018753  |
| 60  | 7 | 0 | 0.466965  | -1.704820 | 5.702635  |
| 61  | 6 | 0 | 2.320134  | -2.972205 | -2.779848 |
| 62  | 1 | 0 | 3.075778  | -3.521211 | -2.222965 |
| 63  | 6 | 0 | 2.698406  | -1.791123 | -3.432587 |
| 64  | 6 | 0 | 4.084559  | -1.296498 | -3.355649 |
| 65  | 1 | 0 | 4.270044  | -0.321629 | -3.834024 |
| 66  | 6 | 0 | 6.330782  | -1.355722 | -2.748846 |
| 67  | 1 | 0 | 6.350471  | -0.376606 | -3.261303 |
| 68  | 6 | 0 | 6.733198  | -1.116163 | -1.285019 |
| 69  | 1 | 0 | 6.665789  | -2.087385 | -0.762264 |
| 70  | 6 | 0 | 8.171638  | -0.593104 | -1.201384 |
| 71  | 1 | 0 | 8.433902  | -0.445857 | -0.148021 |
| 72  | 1 | 0 | 8.205148  | 0.394625  | -1.679269 |
| 73  | 6 | 0 | 9.155975  | -1.542315 | -1.885591 |
| 74  | 1 | 0 | 10.170677 | -1.134433 | -1.827860 |
| 75  | 1 | 0 | 9.168204  | -2.502324 | -1.351658 |
| 76  | 6 | 0 | 8.754883  | -1.782709 | -3.342066 |
| 77  | 1 | 0 | 9.442097  | -2.489624 | -3.818865 |
| 78  | 1 | 0 | 8.833244  | -0.838557 | -3.898264 |
| 79  | 6 | 0 | 7.321153  | -2.306467 | -3.429186 |
| 80  | 1 | 0 | 7.246451  | -3.286047 | -2.939263 |
| 81  | 1 | 0 | 7.015612  | -2.448246 | -4.471543 |
| 82  | 6 | 0 | 5.177153  | -0.480702 | 0.326362  |
| 83  | 1 | 0 | 5.248026  | -1.494232 | 0.751454  |
| 84  | 6 | 0 | 4.306109  | 0.458865  | 1.061432  |
| 85  | 6 | 0 | 4.051093  | 1.746376  | 0.564975  |
| 86  | 1 | 0 | 4.473372  | 2.024727  | -0.397489 |
| 87  | 6 | 0 | 3.309147  | 2.653611  | 1.312065  |
| 88  | 6 | 0 | 2.806444  | 2.269521  | 2.562862  |
| 89  | 1 | 0 | 2.247640  | 2.999714  | 3.142280  |
| 90  | 6 | 0 | 3.051806  | 0.997530  | 3.063356  |
| 91  | 6 | 0 | 3.798149  | 0.088132  | 2.301006  |
| 92  | 1 | 0 | 3.997701  | -0.897141 | 2.714894  |
| 93  | 6 | 0 | 2.598415  | 0.658900  | 4.426859  |
| 94  | 1 | 0 | 1.964399  | 1.413992  | 4.917127  |
| 95  | 6 | 0 | 2.515165  | -0.589625 | 6.389185  |
| 96  | 1 | 0 | 1.876934  | 0.247059  | 6.726563  |
| 97  | 6 | 0 | 1.675950  | -1.872590 | 6.484430  |
| 98  | 1 | 0 | 2.295565  | -2.702583 | 6.099152  |
| 99  | 6 | 0 | 1.292079  | -2.158331 | 7.940513  |
| 100 | 1 | 0 | 0.706567  | -3.083502 | 7.976361  |
| 101 | 1 | 0 | 0.633461  | -1.350819 | 8.285863  |
| 102 | 6 | 0 | 2.524999  | -2.252093 | 8.839320  |
| 103 | 1 | 0 | 3.138717  | -3.108820 | 8.529171  |
| 104 | 1 | 0 | 2.220573  | -2.438110 | 9.874675  |
| 105 | 6 | 0 | 3.361166  | -0.974534 | 8.745512  |
| 106 | 1 | 0 | 2.778372  | -0.132243 | 9.142687  |
| 107 | 1 | 0 | 4.261322  | -1.056968 | 9.363700  |
| 108 | 6 | 0 | 3.748134  | -0.685708 | 7.294766  |
| 109 | 1 | 0 | 4.393669  | -1.485770 | 6.909685  |
| 110 | 1 | 0 | 4.317168  | 0.247058  | 7.216666  |

|     |   |   |           |           |           |
|-----|---|---|-----------|-----------|-----------|
| 111 | 6 | 0 | 0.260037  | -2.523375 | 4.757254  |
| 112 | 1 | 0 | 0.970408  | -3.331121 | 4.519923  |
| 113 | 7 | 0 | -0.440723 | 0.431808  | -5.372779 |
| 114 | 7 | 0 | -2.256771 | 2.534045  | -4.393613 |
| 115 | 7 | 0 | 0.324516  | 6.035979  | 0.262695  |
| 116 | 7 | 0 | 2.655084  | 4.949614  | 1.573977  |
| 117 | 6 | 0 | 1.749169  | -1.064950 | -4.141723 |
| 118 | 1 | 0 | 2.015596  | -0.139100 | -4.646607 |
| 119 | 6 | 0 | 0.425319  | -1.514638 | -4.215719 |
| 120 | 6 | 0 | -0.599923 | -0.758125 | -4.958139 |
| 121 | 1 | 0 | -1.535869 | -1.304246 | -5.142263 |
| 122 | 6 | 0 | -1.531716 | 0.988681  | -6.159982 |
| 123 | 1 | 0 | -2.468507 | 0.426595  | -5.992884 |
| 124 | 6 | 0 | -1.789497 | 2.448717  | -5.768416 |
| 125 | 1 | 0 | -0.840944 | 3.000356  | -5.898436 |
| 126 | 6 | 0 | -2.859039 | 3.069101  | -6.678145 |
| 127 | 1 | 0 | -3.009436 | 4.112634  | -6.379986 |
| 128 | 1 | 0 | -3.807770 | 2.546454  | -6.498019 |
| 129 | 6 | 0 | -2.476287 | 2.970645  | -8.154520 |
| 130 | 1 | 0 | -3.267296 | 3.403813  | -8.775783 |
| 131 | 1 | 0 | -1.568428 | 3.561837  | -8.336061 |
| 132 | 6 | 0 | -2.217031 | 1.516406  | -8.548171 |
| 133 | 1 | 0 | -1.904886 | 1.449904  | -9.595789 |
| 134 | 1 | 0 | -3.151076 | 0.945577  | -8.456759 |
| 135 | 6 | 0 | -1.152543 | 0.894401  | -7.645002 |
| 136 | 1 | 0 | -0.190628 | 1.404942  | -7.786743 |
| 137 | 1 | 0 | -0.991845 | -0.159902 | -7.896185 |
| 138 | 6 | 0 | -1.706473 | 3.405830  | -3.653127 |
| 139 | 1 | 0 | -0.872268 | 4.026734  | -4.017217 |
| 140 | 6 | 0 | -2.096910 | 3.640679  | -2.249792 |
| 141 | 6 | 0 | -3.250843 | 3.068936  | -1.698568 |
| 142 | 1 | 0 | -3.900258 | 2.480219  | -2.343441 |
| 143 | 6 | 0 | -3.541963 | 3.229383  | -0.346571 |
| 144 | 6 | 0 | -2.679118 | 3.981652  | 0.461551  |
| 145 | 1 | 0 | -2.913189 | 4.082664  | 1.518308  |
| 146 | 6 | 0 | -1.555290 | 4.589918  | -0.085949 |
| 147 | 6 | 0 | -1.273578 | 4.420397  | -1.447089 |
| 148 | 1 | 0 | -0.383136 | 4.893309  | -1.853743 |
| 149 | 6 | 0 | -0.656811 | 5.403959  | 0.756875  |
| 150 | 1 | 0 | -0.891328 | 5.431058  | 1.832198  |
| 151 | 6 | 0 | 1.157068  | 6.820533  | 1.150265  |
| 152 | 1 | 0 | 0.837768  | 6.720611  | 2.203481  |
| 153 | 6 | 0 | 2.600474  | 6.301737  | 1.054469  |
| 154 | 1 | 0 | 2.897136  | 6.341337  | -0.009225 |
| 155 | 6 | 0 | 3.545992  | 7.182946  | 1.879750  |
| 156 | 1 | 0 | 4.566541  | 6.798689  | 1.775493  |
| 157 | 1 | 0 | 3.273213  | 7.079291  | 2.938060  |
| 158 | 6 | 0 | 3.464394  | 8.650007  | 1.457219  |
| 159 | 1 | 0 | 3.810809  | 8.751373  | 0.419666  |
| 160 | 1 | 0 | 4.134979  | 9.255226  | 2.076313  |
| 161 | 6 | 0 | 2.027422  | 9.163722  | 1.559605  |
| 162 | 1 | 0 | 1.712130  | 9.146977  | 2.611790  |
| 163 | 1 | 0 | 1.965803  | 10.205049 | 1.226316  |
| 164 | 6 | 0 | 1.082725  | 8.293037  | 0.731199  |
| 165 | 1 | 0 | 1.344632  | 8.359230  | -0.332866 |
| 166 | 1 | 0 | 0.046237  | 8.634954  | 0.825337  |
| 167 | 6 | 0 | 3.131017  | 4.039206  | 0.830634  |
| 168 | 1 | 0 | 3.474584  | 4.241181  | -0.196018 |
| 169 | 6 | 0 | 0.832358  | -0.505787 | -0.775926 |

|     |   |   |           |           |           |
|-----|---|---|-----------|-----------|-----------|
| 170 | 6 | 0 | 0.225807  | -1.654856 | -0.272640 |
| 171 | 6 | 0 | -1.101601 | -1.917524 | -0.610367 |
| 172 | 6 | 0 | -1.841150 | -1.048882 | -1.418814 |
| 173 | 6 | 0 | -1.210622 | 0.108047  | -1.886074 |
| 174 | 6 | 0 | 0.129149  | 0.378707  | -1.589885 |
| 175 | 1 | 0 | 1.882424  | -0.311996 | -0.556182 |
| 176 | 1 | 0 | -1.533180 | -2.849892 | -0.268775 |
| 177 | 1 | 0 | -1.741188 | 0.797234  | -2.539536 |
| 178 | 6 | 0 | -3.311509 | -1.329770 | -1.750979 |
| 179 | 6 | 0 | -3.638297 | -1.031644 | -3.222336 |
| 180 | 6 | 0 | -3.692244 | -2.787937 | -1.478097 |
| 181 | 6 | 0 | -4.167525 | -0.419025 | -0.861591 |
| 182 | 1 | 0 | -4.719020 | -1.123378 | -3.382789 |
| 183 | 1 | 0 | -3.337851 | -0.024615 | -3.533151 |
| 184 | 1 | 0 | -3.147638 | -1.758589 | -3.878438 |
| 185 | 1 | 0 | -4.706070 | -2.982558 | -1.845874 |
| 186 | 1 | 0 | -2.999417 | -3.489978 | -1.959136 |
| 187 | 1 | 0 | -3.687306 | -2.987629 | -0.404398 |
| 188 | 1 | 0 | -5.238487 | -0.578873 | -1.045122 |
| 189 | 1 | 0 | -3.969687 | -0.587328 | 0.203107  |
| 190 | 1 | 0 | -3.924467 | 0.621402  | -1.080896 |
| 191 | 6 | 0 | 1.010512  | -2.619718 | 0.579179  |
| 192 | 6 | 0 | 0.824630  | 1.576236  | -2.185157 |
| 193 | 1 | 0 | 0.487171  | -3.577851 | 0.670954  |
| 194 | 1 | 0 | 2.002030  | -2.800760 | 0.144880  |
| 195 | 1 | 0 | 1.166163  | -2.217565 | 1.588220  |
| 196 | 1 | 0 | 0.529370  | 1.710337  | -3.233017 |
| 197 | 1 | 0 | 0.578954  | 2.494460  | -1.638622 |
| 198 | 1 | 0 | 1.912012  | 1.447703  | -2.147468 |

CC3-R-a(+) D2 cc3-rrad

Standard orientation:

| Center<br>Number | Atomic<br>Number | Atomic<br>Type | Coordinates (Angstroms) |           |           |
|------------------|------------------|----------------|-------------------------|-----------|-----------|
|                  |                  |                | X                       | Y         | Z         |
| 1                | 7                | 0              | 0.922782                | 5.546551  | 1.099266  |
| 2                | 7                | 0              | -0.922782               | 5.546551  | -1.099266 |
| 3                | 7                | 0              | -5.565048               | 1.124357  | -0.901788 |
| 4                | 7                | 0              | -5.565048               | -1.124357 | 0.901788  |
| 5                | 6                | 0              | 1.363463                | 3.240527  | 2.727505  |
| 6                | 1                | 0              | 0.517573                | 3.884979  | 2.953403  |
| 7                | 6                | 0              | 2.165379                | 3.560576  | 1.615294  |
| 8                | 6                | 0              | 1.861201                | 4.750147  | 0.795692  |
| 9                | 1                | 0              | 2.508494                | 4.909682  | -0.079715 |
| 10               | 6                | 0              | 0.723957                | 6.711333  | 0.259423  |
| 11               | 1                | 0              | 1.393037                | 6.693773  | -0.618990 |
| 12               | 6                | 0              | -0.723957               | 6.711333  | -0.259423 |
| 13               | 1                | 0              | -1.393037               | 6.693773  | 0.618990  |
| 14               | 6                | 0              | -0.994878               | 7.977287  | -1.081551 |
| 15               | 1                | 0              | -2.032417               | 7.954721  | -1.431493 |
| 16               | 1                | 0              | -0.355358               | 7.952939  | -1.973210 |
| 17               | 6                | 0              | -0.716998               | 9.240551  | -0.266088 |
| 18               | 1                | 0              | -0.898056               | 10.126980 | -0.881886 |
| 19               | 1                | 0              | -1.417261               | 9.291550  | 0.578360  |
| 20               | 6                | 0              | 0.716998                | 9.240551  | 0.266088  |
| 21               | 1                | 0              | 0.898056                | 10.126980 | 0.881886  |
| 22               | 1                | 0              | 1.417261                | 9.291550  | -0.578360 |

|    |   |   |            |           |           |
|----|---|---|------------|-----------|-----------|
| 23 | 6 | 0 | 0.994878   | 7.977287  | 1.081551  |
| 24 | 1 | 0 | 0.355358   | 7.952939  | 1.973210  |
| 25 | 1 | 0 | 2.032417   | 7.954721  | 1.431493  |
| 26 | 6 | 0 | -1.861201  | 4.750147  | -0.795692 |
| 27 | 1 | 0 | -2.508494  | 4.909682  | 0.079715  |
| 28 | 6 | 0 | -2.165379  | 3.560576  | -1.615294 |
| 29 | 6 | 0 | -1.363463  | 3.240527  | -2.727505 |
| 30 | 1 | 0 | -0.517573  | 3.884979  | -2.953403 |
| 31 | 6 | 0 | -1.658553  | 2.137018  | -3.529002 |
| 32 | 6 | 0 | -2.762442  | 1.340930  | -3.214940 |
| 33 | 1 | 0 | -2.988829  | 0.490067  | -3.852031 |
| 34 | 6 | 0 | -3.565978  | 1.648851  | -2.115173 |
| 35 | 6 | 0 | -3.259193  | 2.766132  | -1.314865 |
| 36 | 1 | 0 | -3.905712  | 2.992708  | -0.471500 |
| 37 | 6 | 0 | -4.743863  | 0.821683  | -1.826084 |
| 38 | 1 | 0 | -4.887775  | -0.058998 | -2.469045 |
| 39 | 6 | 0 | -6.719294  | 0.277811  | -0.723538 |
| 40 | 1 | 0 | -6.704761  | -0.586310 | -1.410247 |
| 41 | 6 | 0 | -6.719294  | -0.277811 | 0.723538  |
| 42 | 1 | 0 | -6.704761  | 0.586310  | 1.410247  |
| 43 | 6 | 0 | -7.990611  | -1.107252 | 0.962111  |
| 44 | 1 | 0 | -7.966536  | -1.486808 | 1.989043  |
| 45 | 1 | 0 | -7.962133  | -1.979283 | 0.296802  |
| 46 | 6 | 0 | -9.253559  | -0.285914 | 0.709056  |
| 47 | 1 | 0 | -9.306636  | 0.537402  | 1.433648  |
| 48 | 1 | 0 | -10.137964 | -0.909509 | 0.872101  |
| 49 | 6 | 0 | -9.253559  | 0.285914  | -0.709056 |
| 50 | 1 | 0 | -9.306636  | -0.537402 | -1.433648 |
| 51 | 1 | 0 | -10.137964 | 0.909509  | -0.872101 |
| 52 | 6 | 0 | -7.990611  | 1.107252  | -0.962111 |
| 53 | 1 | 0 | -7.962133  | 1.979283  | -0.296802 |
| 54 | 1 | 0 | -7.966536  | 1.486808  | -1.989043 |
| 55 | 6 | 0 | -4.743863  | -0.821683 | 1.826084  |
| 56 | 1 | 0 | -4.887775  | 0.058998  | 2.469045  |
| 57 | 7 | 0 | 5.565048   | 1.124357  | 0.901788  |
| 58 | 7 | 0 | 5.565048   | -1.124357 | -0.901788 |
| 59 | 7 | 0 | 1.115244   | -0.907561 | -5.515486 |
| 60 | 7 | 0 | -1.115244  | 0.907561  | -5.515486 |
| 61 | 6 | 0 | 3.259193   | 2.766132  | 1.314865  |
| 62 | 1 | 0 | 3.905712   | 2.992708  | 0.471500  |
| 63 | 6 | 0 | 3.565978   | 1.648851  | 2.115173  |
| 64 | 6 | 0 | 4.743863   | 0.821683  | 1.826084  |
| 65 | 1 | 0 | 4.887775   | -0.058998 | 2.469045  |
| 66 | 6 | 0 | 6.719294   | 0.277811  | 0.723538  |
| 67 | 1 | 0 | 6.704761   | -0.586310 | 1.410247  |
| 68 | 6 | 0 | 6.719294   | -0.277811 | -0.723538 |
| 69 | 1 | 0 | 6.704761   | 0.586310  | -1.410247 |
| 70 | 6 | 0 | 7.990611   | -1.107252 | -0.962111 |
| 71 | 1 | 0 | 7.966536   | -1.486808 | -1.989043 |
| 72 | 1 | 0 | 7.962133   | -1.979283 | -0.296802 |
| 73 | 6 | 0 | 9.253559   | -0.285914 | -0.709056 |
| 74 | 1 | 0 | 10.137964  | -0.909509 | -0.872101 |
| 75 | 1 | 0 | 9.306636   | 0.537402  | -1.433648 |
| 76 | 6 | 0 | 9.253559   | 0.285914  | 0.709056  |
| 77 | 1 | 0 | 10.137964  | 0.909509  | 0.872101  |
| 78 | 1 | 0 | 9.306636   | -0.537402 | 1.433648  |
| 79 | 6 | 0 | 7.990611   | 1.107252  | 0.962111  |
| 80 | 1 | 0 | 7.962133   | 1.979283  | 0.296802  |
| 81 | 1 | 0 | 7.966536   | 1.486808  | 1.989043  |

|     |   |   |           |           |            |
|-----|---|---|-----------|-----------|------------|
| 82  | 6 | 0 | 4.743863  | -0.821683 | -1.826084  |
| 83  | 1 | 0 | 4.887775  | 0.058998  | -2.469045  |
| 84  | 6 | 0 | 3.565978  | -1.648851 | -2.115173  |
| 85  | 6 | 0 | 3.259193  | -2.766132 | -1.314865  |
| 86  | 1 | 0 | 3.905712  | -2.992708 | -0.471500  |
| 87  | 6 | 0 | 2.165379  | -3.560576 | -1.615294  |
| 88  | 6 | 0 | 1.363463  | -3.240527 | -2.727505  |
| 89  | 1 | 0 | 0.517573  | -3.884979 | -2.953403  |
| 90  | 6 | 0 | 1.658553  | -2.137018 | -3.529002  |
| 91  | 6 | 0 | 2.762442  | -1.340930 | -3.214940  |
| 92  | 1 | 0 | 2.988829  | -0.490067 | -3.852031  |
| 93  | 6 | 0 | 0.825625  | -1.845117 | -4.713248  |
| 94  | 1 | 0 | -0.044809 | -2.501160 | -4.864299  |
| 95  | 6 | 0 | 0.268303  | -0.720802 | -6.676936  |
| 96  | 1 | 0 | -0.601987 | -1.400322 | -6.655709  |
| 97  | 6 | 0 | -0.268303 | 0.720802  | -6.676936  |
| 98  | 1 | 0 | 0.601987  | 1.400322  | -6.655709  |
| 99  | 6 | 0 | -1.091209 | 0.983766  | -7.944153  |
| 100 | 1 | 0 | -1.451854 | 2.017637  | -7.921362  |
| 101 | 1 | 0 | -1.976338 | 0.335197  | -7.920691  |
| 102 | 6 | 0 | -0.272565 | 0.714503  | -9.207074  |
| 103 | 1 | 0 | 0.565457  | 1.422499  | -9.257376  |
| 104 | 1 | 0 | -0.889647 | 0.890357  | -10.093668 |
| 105 | 6 | 0 | 0.272565  | -0.714503 | -9.207074  |
| 106 | 1 | 0 | -0.565457 | -1.422499 | -9.257376  |
| 107 | 1 | 0 | 0.889647  | -0.890357 | -10.093668 |
| 108 | 6 | 0 | 1.091209  | -0.983766 | -7.944153  |
| 109 | 1 | 0 | 1.976338  | -0.335197 | -7.920691  |
| 110 | 1 | 0 | 1.451854  | -2.017637 | -7.921362  |
| 111 | 6 | 0 | -0.825625 | 1.845117  | -4.713248  |
| 112 | 1 | 0 | 0.044809  | 2.501160  | -4.864299  |
| 113 | 7 | 0 | 1.115244  | 0.907561  | 5.515486   |
| 114 | 7 | 0 | -1.115244 | -0.907561 | 5.515486   |
| 115 | 7 | 0 | -0.922782 | -5.546551 | 1.099266   |
| 116 | 7 | 0 | 0.922782  | -5.546551 | -1.099266  |
| 117 | 6 | 0 | 2.762442  | 1.340930  | 3.214940   |
| 118 | 1 | 0 | 2.988829  | 0.490067  | 3.852031   |
| 119 | 6 | 0 | 1.658553  | 2.137018  | 3.529002   |
| 120 | 6 | 0 | 0.825625  | 1.845117  | 4.713248   |
| 121 | 1 | 0 | -0.044809 | 2.501160  | 4.864299   |
| 122 | 6 | 0 | 0.268303  | 0.720802  | 6.676936   |
| 123 | 1 | 0 | -0.601987 | 1.400322  | 6.655709   |
| 124 | 6 | 0 | -0.268303 | -0.720802 | 6.676936   |
| 125 | 1 | 0 | 0.601987  | -1.400322 | 6.655709   |
| 126 | 6 | 0 | -1.091209 | -0.983766 | 7.944153   |
| 127 | 1 | 0 | -1.451854 | -2.017637 | 7.921362   |
| 128 | 1 | 0 | -1.976338 | -0.335197 | 7.920691   |
| 129 | 6 | 0 | -0.272565 | -0.714503 | 9.207074   |
| 130 | 1 | 0 | -0.889647 | -0.890357 | 10.093668  |
| 131 | 1 | 0 | 0.565457  | -1.422499 | 9.257376   |
| 132 | 6 | 0 | 0.272565  | 0.714503  | 9.207074   |
| 133 | 1 | 0 | 0.889647  | 0.890357  | 10.093668  |
| 134 | 1 | 0 | -0.565457 | 1.422499  | 9.257376   |
| 135 | 6 | 0 | 1.091209  | 0.983766  | 7.944153   |
| 136 | 1 | 0 | 1.976338  | 0.335197  | 7.920691   |
| 137 | 1 | 0 | 1.451854  | 2.017637  | 7.921362   |
| 138 | 6 | 0 | -0.825625 | -1.845117 | 4.713248   |
| 139 | 1 | 0 | 0.044809  | -2.501160 | 4.864299   |
| 140 | 6 | 0 | -1.658553 | -2.137018 | 3.529002   |

|     |   |   |           |            |           |
|-----|---|---|-----------|------------|-----------|
| 141 | 6 | 0 | -2.762442 | -1.340930  | 3.214940  |
| 142 | 1 | 0 | -2.988829 | -0.490067  | 3.852031  |
| 143 | 6 | 0 | -3.565978 | -1.648851  | 2.115173  |
| 144 | 6 | 0 | -3.259193 | -2.766132  | 1.314865  |
| 145 | 1 | 0 | -3.905712 | -2.992708  | 0.471500  |
| 146 | 6 | 0 | -2.165379 | -3.560576  | 1.615294  |
| 147 | 6 | 0 | -1.363463 | -3.240527  | 2.727505  |
| 148 | 1 | 0 | -0.517573 | -3.884979  | 2.953403  |
| 149 | 6 | 0 | -1.861201 | -4.750147  | 0.795692  |
| 150 | 1 | 0 | -2.508494 | -4.909682  | -0.079715 |
| 151 | 6 | 0 | -0.723957 | -6.711333  | 0.259423  |
| 152 | 1 | 0 | -1.393037 | -6.693773  | -0.618990 |
| 153 | 6 | 0 | 0.723957  | -6.711333  | -0.259423 |
| 154 | 1 | 0 | 1.393037  | -6.693773  | 0.618990  |
| 155 | 6 | 0 | 0.994878  | -7.977287  | -1.081551 |
| 156 | 1 | 0 | 2.032417  | -7.954721  | -1.431493 |
| 157 | 1 | 0 | 0.355358  | -7.952939  | -1.973210 |
| 158 | 6 | 0 | 0.716998  | -9.240551  | -0.266088 |
| 159 | 1 | 0 | 1.417261  | -9.291550  | 0.578360  |
| 160 | 1 | 0 | 0.898056  | -10.126980 | -0.881886 |
| 161 | 6 | 0 | -0.716998 | -9.240551  | 0.266088  |
| 162 | 1 | 0 | -1.417261 | -9.291550  | -0.578360 |
| 163 | 1 | 0 | -0.898056 | -10.126980 | 0.881886  |
| 164 | 6 | 0 | -0.994878 | -7.977287  | 1.081551  |
| 165 | 1 | 0 | -0.355358 | -7.952939  | 1.973210  |
| 166 | 1 | 0 | -2.032417 | -7.954721  | 1.431493  |
| 167 | 6 | 0 | 1.861201  | -4.750147  | -0.795692 |
| 168 | 1 | 0 | 2.508494  | -4.909682  | 0.079715  |

CC3-R-b(+) C2 cc3-raddx

Standard orientation:

| Center<br>Number | Atomic<br>Number | Atomic<br>Type | Coordinates (Angstroms) |            |           |
|------------------|------------------|----------------|-------------------------|------------|-----------|
|                  |                  |                | X                       | Y          | Z         |
| 1                | 7                | 0              | 2.409430                | -5.097545  | 0.900310  |
| 2                | 7                | 0              | 0.298326                | -5.680078  | -0.944669 |
| 3                | 7                | 0              | -0.577646               | -1.324913  | -5.565583 |
| 4                | 7                | 0              | 0.577646                | 1.324913   | -5.565583 |
| 5                | 6                | 0              | 3.466376                | -2.458851  | 1.355606  |
| 6                | 1                | 0              | 3.850601                | -3.022476  | 0.509137  |
| 7                | 6                | 0              | 2.476222                | -3.044518  | 2.157251  |
| 8                | 6                | 0              | 1.971041                | -4.399866  | 1.864749  |
| 9                | 1                | 0              | 1.194979                | -4.776202  | 2.549559  |
| 10               | 6                | 0              | 1.874039                | -6.435908  | 0.741478  |
| 11               | 1                | 0              | 1.011296                | -6.609623  | 1.409256  |
| 12               | 6                | 0              | 1.385882                | -6.609745  | -0.705642 |
| 13               | 1                | 0              | 2.241712                | -6.402244  | -1.371451 |
| 14               | 6                | 0              | 0.887351                | -8.040223  | -0.940228 |
| 15               | 1                | 0              | 0.550611                | -8.135437  | -1.978158 |
| 16               | 1                | 0              | 0.011250                | -8.209782  | -0.301270 |
| 17               | 6                | 0              | 1.979035                | -9.062614  | -0.620903 |
| 18               | 1                | 0              | 1.594435                | -10.075535 | -0.775447 |
| 19               | 1                | 0              | 2.817298                | -8.930858  | -1.318105 |
| 20               | 6                | 0              | 2.482509                | -8.891861  | 0.813380  |
| 21               | 1                | 0              | 3.290016                | -9.600267  | 1.022733  |
| 22               | 1                | 0              | 1.667954                | -9.122809  | 1.512840  |
| 23               | 6                | 0              | 2.969264                | -7.462300  | 1.054207  |

|    |   |   |           |           |            |
|----|---|---|-----------|-----------|------------|
| 24 | 1 | 0 | 3.837644  | -7.244262 | 0.419219   |
| 25 | 1 | 0 | 3.290807  | -7.325279 | 2.092068   |
| 26 | 6 | 0 | 0.443814  | -4.812831 | -1.856246  |
| 27 | 1 | 0 | 1.355743  | -4.736830 | -2.465800  |
| 28 | 6 | 0 | -0.634445 | -3.852573 | -2.169660  |
| 29 | 6 | 0 | -1.796395 | -3.814836 | -1.366069  |
| 30 | 1 | 0 | -1.850112 | -4.497998 | -0.521801  |
| 31 | 6 | 0 | -2.854505 | -2.942859 | -1.651580  |
| 32 | 6 | 0 | -2.745546 | -2.089041 | -2.744299  |
| 33 | 1 | 0 | -3.571357 | -1.418446 | -2.966536  |
| 34 | 6 | 0 | -1.596642 | -2.114101 | -3.552432  |
| 35 | 6 | 0 | -0.539323 | -3.006552 | -3.256412  |
| 36 | 1 | 0 | 0.331348  | -3.015580 | -3.905602  |
| 37 | 6 | 0 | -1.533870 | -1.242893 | -4.714820  |
| 38 | 1 | 0 | -2.365588 | -0.537164 | -4.846653  |
| 39 | 6 | 0 | -0.634445 | -0.470801 | -6.708394  |
| 40 | 1 | 0 | -1.522130 | 0.183253  | -6.706507  |
| 41 | 6 | 0 | 0.634445  | 0.470801  | -6.708394  |
| 42 | 1 | 0 | 1.522130  | -0.183253 | -6.706507  |
| 43 | 6 | 0 | 0.605061  | 1.331297  | -7.986347  |
| 44 | 1 | 0 | 1.481279  | 1.987513  | -7.960926  |
| 45 | 1 | 0 | -0.281523 | 1.975337  | -7.946909  |
| 46 | 6 | 0 | 0.597151  | 0.476650  | -9.249734  |
| 47 | 1 | 0 | 1.528383  | -0.101455 | -9.308965  |
| 48 | 1 | 0 | 0.570435  | 1.126713  | -10.129350 |
| 49 | 6 | 0 | -0.597151 | -0.476650 | -9.249734  |
| 50 | 1 | 0 | -1.528383 | 0.101455  | -9.308965  |
| 51 | 1 | 0 | -0.570435 | -1.126713 | -10.129350 |
| 52 | 6 | 0 | -0.605061 | -1.331297 | -7.986347  |
| 53 | 1 | 0 | 0.281523  | -1.975337 | -7.946909  |
| 54 | 1 | 0 | -1.481279 | -1.987513 | -7.960926  |
| 55 | 6 | 0 | 1.533870  | 1.242893  | -4.714820  |
| 56 | 1 | 0 | 2.365588  | 0.537164  | -4.846653  |
| 57 | 7 | 0 | 1.149626  | -0.863976 | 5.564214   |
| 58 | 7 | 0 | -1.149626 | 0.863976  | 5.564214   |
| 59 | 7 | 0 | -5.531663 | -0.528059 | 1.065023   |
| 60 | 7 | 0 | -5.099992 | -2.293021 | -1.156886  |
| 61 | 6 | 0 | 1.985396  | -2.351003 | 3.256575   |
| 62 | 1 | 0 | 1.228097  | -2.787228 | 3.903038   |
| 63 | 6 | 0 | 2.472549  | -1.073605 | 3.568100   |
| 64 | 6 | 0 | 1.980795  | -0.349208 | 4.758241   |
| 65 | 1 | 0 | 2.395969  | 0.659143  | 4.910038   |
| 66 | 6 | 0 | 0.763120  | -0.087172 | 6.726892   |
| 67 | 1 | 0 | 1.212576  | 0.921782  | 6.704995   |
| 68 | 6 | 0 | -0.763120 | 0.087172  | 6.726892   |
| 69 | 1 | 0 | -1.212576 | -0.921782 | 6.704995   |
| 70 | 6 | 0 | -1.219258 | 0.819602  | 7.993787   |
| 71 | 1 | 0 | -2.309783 | 0.919266  | 7.971218   |
| 72 | 1 | 0 | -0.804927 | 1.835854  | 7.971583   |
| 73 | 6 | 0 | -0.759397 | 0.090773  | 9.256998   |
| 74 | 1 | 0 | -1.080386 | 0.644962  | 10.144739  |
| 75 | 1 | 0 | -1.241599 | -0.894879 | 9.305855   |
| 76 | 6 | 0 | 0.759397  | -0.090773 | 9.256998   |
| 77 | 1 | 0 | 1.080386  | -0.644962 | 10.144739  |
| 78 | 1 | 0 | 1.241599  | 0.894879  | 9.305855   |
| 79 | 6 | 0 | 1.219258  | -0.819602 | 7.993787   |
| 80 | 1 | 0 | 0.804927  | -1.835854 | 7.971583   |
| 81 | 1 | 0 | 2.309783  | -0.919266 | 7.971218   |
| 82 | 6 | 0 | -1.980795 | 0.349208  | 4.758241   |



|     |   |   |           |           |           |
|-----|---|---|-----------|-----------|-----------|
| 83  | 1 | 0 | -2.395969 | -0.659143 | 4.910038  |
| 84  | 6 | 0 | -2.472549 | 1.073605  | 3.568100  |
| 85  | 6 | 0 | -1.985396 | 2.351003  | 3.256575  |
| 86  | 1 | 0 | -1.228097 | 2.787228  | 3.903038  |
| 87  | 6 | 0 | -2.476222 | 3.044518  | 2.157251  |
| 88  | 6 | 0 | -3.466376 | 2.458851  | 1.355606  |
| 89  | 1 | 0 | -3.850601 | 3.022476  | 0.509137  |
| 90  | 6 | 0 | -3.955151 | 1.193290  | 1.654688  |
| 91  | 6 | 0 | -3.450596 | 0.500880  | 2.765139  |
| 92  | 1 | 0 | -3.854241 | -0.482702 | 2.991407  |
| 93  | 6 | 0 | -5.022770 | 0.607538  | 0.821098  |
| 94  | 1 | 0 | -5.365273 | 1.229682  | -0.021098 |
| 95  | 6 | 0 | -6.615543 | -0.979333 | 0.214430  |
| 96  | 1 | 0 | -6.752776 | -0.313539 | -0.656686 |
| 97  | 6 | 0 | -6.280666 | -2.381587 | -0.318130 |
| 98  | 1 | 0 | -6.103004 | -3.033453 | 0.554729  |
| 99  | 6 | 0 | -7.443403 | -2.938137 | -1.147833 |
| 100 | 1 | 0 | -7.178371 | -3.938291 | -1.507230 |
| 101 | 1 | 0 | -7.571138 | -2.301849 | -2.033068 |
| 102 | 6 | 0 | -8.736703 | -2.972109 | -0.332443 |
| 103 | 1 | 0 | -8.620598 | -3.670349 | 0.507155  |
| 104 | 1 | 0 | -9.554759 | -3.353817 | -0.951283 |
| 105 | 6 | 0 | -9.074902 | -1.582085 | 0.208754  |
| 106 | 1 | 0 | -9.288274 | -0.908207 | -0.631861 |
| 107 | 1 | 0 | -9.980327 | -1.619555 | 0.822356  |
| 108 | 6 | 0 | -7.913610 | -1.020041 | 1.029582  |
| 109 | 1 | 0 | -7.742123 | -1.640093 | 1.918837  |
| 110 | 1 | 0 | -8.135259 | -0.008114 | 1.384846  |
| 111 | 6 | 0 | -4.078424 | -2.962467 | -0.821771 |
| 112 | 1 | 0 | -4.050126 | -3.598642 | 0.074158  |
| 113 | 7 | 0 | 5.531663  | 0.528059  | 1.065023  |
| 114 | 7 | 0 | 5.099992  | 2.293021  | -1.156886 |
| 115 | 7 | 0 | -0.298326 | 5.680078  | -0.944669 |
| 116 | 7 | 0 | -2.409430 | 5.097545  | 0.900310  |
| 117 | 6 | 0 | 3.450596  | -0.500880 | 2.765139  |
| 118 | 1 | 0 | 3.854241  | 0.482702  | 2.991407  |
| 119 | 6 | 0 | 3.955151  | -1.193290 | 1.654688  |
| 120 | 6 | 0 | 5.022770  | -0.607538 | 0.821098  |
| 121 | 1 | 0 | 5.365273  | -1.229682 | -0.021098 |
| 122 | 6 | 0 | 6.615543  | 0.979333  | 0.214430  |
| 123 | 1 | 0 | 6.752776  | 0.313539  | -0.656686 |
| 124 | 6 | 0 | 6.280666  | 2.381587  | -0.318130 |
| 125 | 1 | 0 | 6.103004  | 3.033453  | 0.554729  |
| 126 | 6 | 0 | 7.443403  | 2.938137  | -1.147833 |
| 127 | 1 | 0 | 7.178371  | 3.938291  | -1.507230 |
| 128 | 1 | 0 | 7.571138  | 2.301849  | -2.033068 |
| 129 | 6 | 0 | 8.736703  | 2.972109  | -0.332443 |
| 130 | 1 | 0 | 9.554759  | 3.353817  | -0.951283 |
| 131 | 1 | 0 | 8.620598  | 3.670349  | 0.507155  |
| 132 | 6 | 0 | 9.074902  | 1.582085  | 0.208754  |
| 133 | 1 | 0 | 9.980327  | 1.619555  | 0.822356  |
| 134 | 1 | 0 | 9.288274  | 0.908207  | -0.631861 |
| 135 | 6 | 0 | 7.913610  | 1.020041  | 1.029582  |
| 136 | 1 | 0 | 7.742123  | 1.640093  | 1.918837  |
| 137 | 1 | 0 | 8.135259  | 0.008114  | 1.384846  |
| 138 | 6 | 0 | 4.078424  | 2.962467  | -0.821771 |
| 139 | 1 | 0 | 4.050126  | 3.598642  | 0.074158  |
| 140 | 6 | 0 | 2.854505  | 2.942859  | -1.651580 |
| 141 | 6 | 0 | 2.745546  | 2.089041  | -2.744299 |

|     |   |   |           |           |           |
|-----|---|---|-----------|-----------|-----------|
| 142 | 1 | 0 | 3.571357  | 1.418446  | -2.966536 |
| 143 | 6 | 0 | 1.596642  | 2.114101  | -3.552432 |
| 144 | 6 | 0 | 0.539323  | 3.006552  | -3.256412 |
| 145 | 1 | 0 | -0.331348 | 3.015580  | -3.905602 |
| 146 | 6 | 0 | 0.634445  | 3.852573  | -2.169660 |
| 147 | 6 | 0 | 1.796395  | 3.814836  | -1.366069 |
| 148 | 1 | 0 | 1.850112  | 4.497998  | -0.521801 |
| 149 | 6 | 0 | -0.443814 | 4.812831  | -1.856246 |
| 150 | 1 | 0 | -1.355743 | 4.736830  | -2.465800 |
| 151 | 6 | 0 | -1.385882 | 6.609745  | -0.705642 |
| 152 | 1 | 0 | -2.241712 | 6.402244  | -1.371451 |
| 153 | 6 | 0 | -1.874039 | 6.435908  | 0.741478  |
| 154 | 1 | 0 | -1.011296 | 6.609623  | 1.409256  |
| 155 | 6 | 0 | -2.969264 | 7.462300  | 1.054207  |
| 156 | 1 | 0 | -3.290807 | 7.325279  | 2.092068  |
| 157 | 1 | 0 | -3.837644 | 7.244262  | 0.419219  |
| 158 | 6 | 0 | -2.482509 | 8.891861  | 0.813380  |
| 159 | 1 | 0 | -1.667954 | 9.122809  | 1.512840  |
| 160 | 1 | 0 | -3.290016 | 9.600267  | 1.022733  |
| 161 | 6 | 0 | -1.979035 | 9.062614  | -0.620903 |
| 162 | 1 | 0 | -2.817298 | 8.930858  | -1.318105 |
| 163 | 1 | 0 | -1.594435 | 10.075535 | -0.775447 |
| 164 | 6 | 0 | -0.887351 | 8.040223  | -0.940228 |
| 165 | 1 | 0 | -0.011250 | 8.209782  | -0.301270 |
| 166 | 1 | 0 | -0.550611 | 8.135437  | -1.978158 |
| 167 | 6 | 0 | -1.971041 | 4.399866  | 1.864749  |
| 168 | 1 | 0 | -1.194979 | 4.776202  | 2.549559  |

3I@CC3-a C2 cc3-i3a

Standard orientation:

| Center<br>Number | Atomic<br>Number | Atomic<br>Type | Coordinates (Angstroms) |           |          |
|------------------|------------------|----------------|-------------------------|-----------|----------|
|                  |                  |                | X                       | Y         | Z        |
| 1                | 7                | 0              | -0.666688               | 1.284178  | 5.202448 |
| 2                | 6                | 0              | -0.827793               | 3.044594  | 2.937451 |
| 3                | 1                | 0              | 0.043461                | 3.121824  | 3.582966 |
| 4                | 6                | 0              | -1.826984               | 2.119109  | 3.266944 |
| 5                | 6                | 0              | -1.684622               | 1.242874  | 4.446839 |
| 6                | 1                | 0              | -2.520198               | 0.549045  | 4.629953 |
| 7                | 6                | 0              | -0.649364               | 0.409230  | 6.358805 |
| 8                | 1                | 0              | -1.492667               | -0.304380 | 6.336504 |
| 9                | 6                | 0              | -0.743926               | 1.265012  | 7.627958 |
| 10               | 1                | 0              | -1.684380               | 1.826404  | 7.604803 |
| 11               | 1                | 0              | 0.068649                | 2.002920  | 7.606037 |
| 12               | 6                | 0              | -0.645283               | 0.410380  | 8.891800 |
| 13               | 1                | 0              | -0.695460               | 1.048814  | 9.780137 |
| 14               | 1                | 0              | -1.506065               | -0.270374 | 8.939789 |
| 15               | 7                | 0              | -0.000000               | 5.657845  | 0.541235 |
| 16               | 6                | 0              | -2.084868               | 3.717282  | 0.992571 |
| 17               | 1                | 0              | -2.165807               | 4.351129  | 0.113039 |
| 18               | 6                | 0              | -0.950601               | 3.843124  | 1.806216 |
| 19               | 6                | 0              | 0.102763                | 4.830583  | 1.496544 |
| 20               | 1                | 0              | 0.978293                | 4.815437  | 2.164537 |
| 21               | 6                | 0              | 1.071379                | 6.618936  | 0.365023 |
| 22               | 1                | 0              | 1.911621                | 6.418375  | 1.054235 |
| 23               | 6                | 0              | 0.523388                | 8.026419  | 0.629295 |
| 24               | 1                | 0              | 0.157809                | 8.074026  | 1.660877 |

|    |   |   |           |            |           |
|----|---|---|-----------|------------|-----------|
| 25 | 1 | 0 | -0.344647 | 8.184447   | -0.023989 |
| 26 | 6 | 0 | 1.579545  | 9.100995   | 0.370043  |
| 27 | 1 | 0 | 1.154318  | 10.094357  | 0.548021  |
| 28 | 1 | 0 | 2.408056  | 8.977398   | 1.080701  |
| 29 | 7 | 0 | -5.292252 | 2.000130   | 0.783900  |
| 30 | 6 | 0 | -2.959507 | 2.019815   | 2.466807  |
| 31 | 1 | 0 | -3.756290 | 1.321923   | 2.710048  |
| 32 | 6 | 0 | -3.092575 | 2.817052   | 1.321826  |
| 33 | 6 | 0 | -4.304696 | 2.736085   | 0.482709  |
| 34 | 1 | 0 | -4.307535 | 3.375316   | -0.414045 |
| 35 | 6 | 0 | -6.454751 | 2.041930   | -0.081393 |
| 36 | 1 | 0 | -6.289569 | 2.707118   | -0.948267 |
| 37 | 6 | 0 | -7.655595 | 2.548209   | 0.725728  |
| 38 | 1 | 0 | -7.434688 | 3.556742   | 1.091825  |
| 39 | 1 | 0 | -7.769371 | 1.906465   | 1.609085  |
| 40 | 6 | 0 | -8.939424 | 2.533050   | -0.104174 |
| 41 | 1 | 0 | -9.781824 | 2.880841   | 0.502973  |
| 42 | 1 | 0 | -8.840528 | 3.235202   | -0.943228 |
| 43 | 7 | 0 | 0.666688  | -1.284178  | 5.202448  |
| 44 | 6 | 0 | 0.827793  | -3.044594  | 2.937451  |
| 45 | 1 | 0 | -0.043461 | -3.121824  | 3.582966  |
| 46 | 6 | 0 | 1.826984  | -2.119109  | 3.266944  |
| 47 | 6 | 0 | 1.684622  | -1.242874  | 4.446839  |
| 48 | 1 | 0 | 2.520198  | -0.549045  | 4.629953  |
| 49 | 6 | 0 | 0.649364  | -0.409230  | 6.358805  |
| 50 | 1 | 0 | 1.492667  | 0.304380   | 6.336504  |
| 51 | 6 | 0 | 0.743926  | -1.265012  | 7.627958  |
| 52 | 1 | 0 | 1.684380  | -1.826404  | 7.604803  |
| 53 | 1 | 0 | -0.068649 | -2.002920  | 7.606037  |
| 54 | 6 | 0 | 0.645283  | -0.410380  | 8.891800  |
| 55 | 1 | 0 | 0.695460  | -1.048814  | 9.780137  |
| 56 | 1 | 0 | 1.506065  | 0.270374   | 8.939789  |
| 57 | 7 | 0 | 5.292252  | -2.000130  | 0.783900  |
| 58 | 6 | 0 | 2.959507  | -2.019815  | 2.466807  |
| 59 | 1 | 0 | 3.756290  | -1.321923  | 2.710048  |
| 60 | 6 | 0 | 3.092575  | -2.817052  | 1.321826  |
| 61 | 6 | 0 | 4.304696  | -2.736085  | 0.482709  |
| 62 | 1 | 0 | 4.307535  | -3.375316  | -0.414045 |
| 63 | 6 | 0 | 6.454751  | -2.041930  | -0.081393 |
| 64 | 1 | 0 | 6.289569  | -2.707118  | -0.948267 |
| 65 | 6 | 0 | 7.655595  | -2.548209  | 0.725728  |
| 66 | 1 | 0 | 7.434688  | -3.556742  | 1.091825  |
| 67 | 1 | 0 | 7.769371  | -1.906465  | 1.609085  |
| 68 | 6 | 0 | 8.939424  | -2.533050  | -0.104174 |
| 69 | 1 | 0 | 9.781824  | -2.880841  | 0.502973  |
| 70 | 1 | 0 | 8.840528  | -3.235202  | -0.943228 |
| 71 | 7 | 0 | -0.000000 | -5.657845  | 0.541235  |
| 72 | 6 | 0 | 2.084868  | -3.717282  | 0.992571  |
| 73 | 1 | 0 | 2.165807  | -4.351129  | 0.113039  |
| 74 | 6 | 0 | 0.950601  | -3.843124  | 1.806216  |
| 75 | 6 | 0 | -0.102763 | -4.830583  | 1.496544  |
| 76 | 1 | 0 | -0.978293 | -4.815437  | 2.164537  |
| 77 | 6 | 0 | -1.071379 | -6.618936  | 0.365023  |
| 78 | 1 | 0 | -1.911621 | -6.418375  | 1.054235  |
| 79 | 6 | 0 | -0.523388 | -8.026419  | 0.629295  |
| 80 | 1 | 0 | -0.157809 | -8.074026  | 1.660877  |
| 81 | 1 | 0 | 0.344647  | -8.184447  | -0.023989 |
| 82 | 6 | 0 | -1.579545 | -9.100995  | 0.370043  |
| 83 | 1 | 0 | -1.154318 | -10.094357 | 0.548021  |

|     |   |   |            |           |           |
|-----|---|---|------------|-----------|-----------|
| 84  | 1 | 0 | -2.408056  | -8.977398 | 1.080701  |
| 85  | 7 | 0 | -5.623857  | 0.232806  | -1.479373 |
| 86  | 6 | 0 | -3.414693  | -0.648468 | -3.105727 |
| 87  | 1 | 0 | -3.856597  | 0.318587  | -3.332078 |
| 88  | 6 | 0 | -3.918238  | -1.377228 | -2.019846 |
| 89  | 6 | 0 | -5.028572  | -0.851071 | -1.201421 |
| 90  | 1 | 0 | -5.318313  | -1.470960 | -0.337590 |
| 91  | 6 | 0 | -6.729165  | 0.634118  | -0.631497 |
| 92  | 1 | 0 | -6.842993  | -0.044725 | 0.233046  |
| 93  | 6 | 0 | -8.019360  | 0.623235  | -1.459872 |
| 94  | 1 | 0 | -8.195043  | -0.394519 | -1.825128 |
| 95  | 1 | 0 | -7.864479  | 1.256493  | -2.343169 |
| 96  | 6 | 0 | -9.213311  | 1.131339  | -0.651438 |
| 97  | 1 | 0 | -10.114393 | 1.129855  | -1.273776 |
| 98  | 1 | 0 | -9.404248  | 0.447566  | 0.186854  |
| 99  | 7 | 0 | 2.219103   | 5.210116  | -1.255573 |
| 100 | 6 | 0 | 3.379867   | 2.623263  | -1.723531 |
| 101 | 1 | 0 | 3.762760   | 3.215141  | -0.896151 |
| 102 | 6 | 0 | 2.329910   | 3.147147  | -2.489608 |
| 103 | 6 | 0 | 1.761650   | 4.474267  | -2.181118 |
| 104 | 1 | 0 | 0.921645   | 4.793804  | -2.817462 |
| 105 | 6 | 0 | 1.614114   | 6.514178  | -1.068053 |
| 106 | 1 | 0 | 0.762115   | 6.666447  | -1.755135 |
| 107 | 6 | 0 | 2.671476   | 7.594210  | -1.323633 |
| 108 | 1 | 0 | 3.029026   | 7.501216  | -2.354915 |
| 109 | 1 | 0 | 3.530146   | 7.394656  | -0.669389 |
| 110 | 6 | 0 | 2.121204   | 8.995301  | -1.056417 |
| 111 | 1 | 0 | 2.902248   | 9.743424  | -1.228244 |
| 112 | 1 | 0 | 1.311668   | 9.211364  | -1.766886 |
| 113 | 7 | 0 | 5.623857   | -0.232806 | -1.479373 |
| 114 | 6 | 0 | 3.414693   | 0.648468  | -3.105727 |
| 115 | 1 | 0 | 3.856597   | -0.318587 | -3.332078 |
| 116 | 6 | 0 | 3.918238   | 1.377228  | -2.019846 |
| 117 | 6 | 0 | 5.028572   | 0.851071  | -1.201421 |
| 118 | 1 | 0 | 5.318313   | 1.470960  | -0.337590 |
| 119 | 6 | 0 | 6.729165   | -0.634118 | -0.631497 |
| 120 | 1 | 0 | 6.842993   | 0.044725  | 0.233046  |
| 121 | 6 | 0 | 8.019360   | -0.623235 | -1.459872 |
| 122 | 1 | 0 | 8.195043   | 0.394519  | -1.825128 |
| 123 | 1 | 0 | 7.864479   | -1.256493 | -2.343169 |
| 124 | 6 | 0 | 9.213311   | -1.131339 | -0.651438 |
| 125 | 1 | 0 | 10.114393  | -1.129855 | -1.273776 |
| 126 | 1 | 0 | 9.404248   | -0.447566 | 0.186854  |
| 127 | 7 | 0 | -2.219103  | -5.210116 | -1.255573 |
| 128 | 6 | 0 | -3.379867  | -2.623263 | -1.723531 |
| 129 | 1 | 0 | -3.762760  | -3.215141 | -0.896151 |
| 130 | 6 | 0 | -2.329910  | -3.147147 | -2.489608 |
| 131 | 6 | 0 | -1.761650  | -4.474267 | -2.181118 |
| 132 | 1 | 0 | -0.921645  | -4.793804 | -2.817462 |
| 133 | 6 | 0 | -1.614114  | -6.514178 | -1.068053 |
| 134 | 1 | 0 | -0.762115  | -6.666447 | -1.755135 |
| 135 | 6 | 0 | -2.671476  | -7.594210 | -1.323633 |
| 136 | 1 | 0 | -3.029026  | -7.501216 | -2.354915 |
| 137 | 1 | 0 | -3.530146  | -7.394656 | -0.669389 |
| 138 | 6 | 0 | -2.121204  | -8.995301 | -1.056417 |
| 139 | 1 | 0 | -2.902248  | -9.743424 | -1.228244 |
| 140 | 1 | 0 | -1.311668  | -9.211364 | -1.766886 |
| 141 | 7 | 0 | -1.110752  | -0.916617 | -5.908925 |
| 142 | 6 | 0 | -1.840834  | -2.418596 | -3.567335 |

|     |    |   |           |           |            |
|-----|----|---|-----------|-----------|------------|
| 143 | 1  | 0 | -1.039506 | -2.808504 | -4.189804  |
| 144 | 6  | 0 | -2.388854 | -1.167976 | -3.887120  |
| 145 | 6  | 0 | -1.924473 | -0.420875 | -5.072683  |
| 146 | 1  | 0 | -2.352624 | 0.585405  | -5.201477  |
| 147 | 6  | 0 | -0.759137 | -0.118431 | -7.066551  |
| 148 | 1  | 0 | -1.247818 | 0.872332  | -7.039524  |
| 149 | 6  | 0 | -1.187590 | -0.863126 | -8.335688  |
| 150 | 1  | 0 | -2.273646 | -1.004249 | -8.312950  |
| 151 | 1  | 0 | -0.735782 | -1.863386 | -8.314477  |
| 152 | 6  | 0 | -0.755711 | -0.117677 | -9.598755  |
| 153 | 1  | 0 | -1.057696 | -0.681361 | -10.487723 |
| 154 | 1  | 0 | -1.271756 | 0.850985  | -9.645727  |
| 155 | 7  | 0 | 1.110752  | 0.916617  | -5.908925  |
| 156 | 6  | 0 | 1.840834  | 2.418596  | -3.567335  |
| 157 | 1  | 0 | 1.039506  | 2.808504  | -4.189804  |
| 158 | 6  | 0 | 2.388854  | 1.167976  | -3.887120  |
| 159 | 6  | 0 | 1.924473  | 0.420875  | -5.072683  |
| 160 | 1  | 0 | 2.352624  | -0.585405 | -5.201477  |
| 161 | 6  | 0 | 0.759137  | 0.118431  | -7.066551  |
| 162 | 1  | 0 | 1.247818  | -0.872332 | -7.039524  |
| 163 | 6  | 0 | 1.187590  | 0.863126  | -8.335688  |
| 164 | 1  | 0 | 2.273646  | 1.004249  | -8.312950  |
| 165 | 1  | 0 | 0.735782  | 1.863386  | -8.314477  |
| 166 | 6  | 0 | 0.755711  | 0.117677  | -9.598755  |
| 167 | 1  | 0 | 1.057696  | 0.681361  | -10.487723 |
| 168 | 1  | 0 | 1.271756  | -0.850985 | -9.645727  |
| 169 | 53 | 0 | -2.326352 | -1.552904 | 1.622762   |
| 170 | 53 | 0 | -0.000000 | 0.000000  | 0.684117   |
| 171 | 53 | 0 | 2.326352  | 1.552904  | 1.622762   |

3I@CC3-b C1 cc3-i3

Standard orientation:

| Center<br>Number | Atomic<br>Number | Atomic<br>Type | Coordinates (Angstroms) |           |          |
|------------------|------------------|----------------|-------------------------|-----------|----------|
|                  |                  |                | X                       | Y         | Z        |
| 1                | 7                | 0              | 2.511559                | -4.685791 | 1.437867 |
| 2                | 6                | 0              | 2.070105                | -2.256350 | 2.898863 |
| 3                | 1                | 0              | 3.075514                | -2.460659 | 2.539466 |
| 4                | 6                | 0              | 1.044351                | -3.153741 | 2.569128 |
| 5                | 6                | 0              | 1.331453                | -4.360472 | 1.768060 |
| 6                | 1                | 0              | 0.458104                | -4.972053 | 1.492350 |
| 7                | 6                | 0              | 2.691657                | -5.907602 | 0.680119 |
| 8                | 1                | 0              | 1.726935                | -6.413677 | 0.494191 |
| 9                | 6                | 0              | 3.619708                | -6.848844 | 1.454590 |
| 10               | 1                | 0              | 3.159487                | -7.085301 | 2.420111 |
| 11               | 1                | 0              | 4.552151                | -6.310752 | 1.669056 |
| 12               | 6                | 0              | 3.916597                | -8.121300 | 0.660477 |
| 13               | 1                | 0              | 4.596433                | -8.766534 | 1.226848 |
| 14               | 1                | 0              | 2.986167                | -8.687583 | 0.517137 |
| 15               | 7                | 0              | 2.730281                | 0.785739  | 4.786274 |
| 16               | 6                | 0              | 0.497755                | -0.907504 | 4.133125 |
| 17               | 1                | 0              | 0.310310                | -0.032423 | 4.750302 |
| 18               | 6                | 0              | 1.801939                | -1.132594 | 3.670500 |
| 19               | 6                | 0              | 2.897628                | -0.203607 | 4.010406 |
| 20               | 1                | 0              | 3.873442                | -0.430809 | 3.554516 |
| 21               | 6                | 0              | 3.882477                | 1.617843  | 5.071790 |
| 22               | 1                | 0              | 4.757861                | 1.317623  | 4.468085 |

|    |   |   |           |           |           |
|----|---|---|-----------|-----------|-----------|
| 23 | 6 | 0 | 4.228919  | 1.504709  | 6.560751  |
| 24 | 1 | 0 | 4.476080  | 0.461791  | 6.787297  |
| 25 | 1 | 0 | 3.331202  | 1.753340  | 7.141790  |
| 26 | 6 | 0 | 5.378713  | 2.437520  | 6.942804  |
| 27 | 1 | 0 | 5.591277  | 2.350588  | 8.013590  |
| 28 | 1 | 0 | 6.289555  | 2.129678  | 6.411509  |
| 29 | 7 | 0 | -2.783507 | -2.466837 | 4.335381  |
| 30 | 6 | 0 | -0.244956 | -2.922345 | 3.033358  |
| 31 | 1 | 0 | -1.054000 | -3.611797 | 2.805395  |
| 32 | 6 | 0 | -0.521818 | -1.802667 | 3.831755  |
| 33 | 6 | 0 | -1.858897 | -1.603066 | 4.424682  |
| 34 | 1 | 0 | -1.988757 | -0.671460 | 4.997910  |
| 35 | 6 | 0 | -4.014400 | -2.211500 | 5.059350  |
| 36 | 1 | 0 | -4.008238 | -1.210649 | 5.527767  |
| 37 | 6 | 0 | -4.173789 | -3.279490 | 6.148210  |
| 38 | 1 | 0 | -3.322069 | -3.212386 | 6.833750  |
| 39 | 1 | 0 | -4.120670 | -4.266206 | 5.670077  |
| 40 | 6 | 0 | -5.497230 | -3.128739 | 6.898590  |
| 41 | 1 | 0 | -5.590492 | -3.915872 | 7.654141  |
| 42 | 1 | 0 | -5.506064 | -2.170086 | 7.434926  |
| 43 | 7 | 0 | 2.341333  | -4.755260 | -1.426256 |
| 44 | 6 | 0 | 0.497367  | -3.077057 | -2.843898 |
| 45 | 1 | 0 | 0.121347  | -4.001804 | -2.413233 |
| 46 | 6 | 0 | 1.842268  | -2.740831 | -2.637659 |
| 47 | 6 | 0 | 2.729781  | -3.628637 | -1.859912 |
| 48 | 1 | 0 | 3.751092  | -3.255276 | -1.689397 |
| 49 | 6 | 0 | 3.294551  | -5.561706 | -0.690639 |
| 50 | 1 | 0 | 4.237231  | -5.013485 | -0.512690 |
| 51 | 6 | 0 | 3.590668  | -6.840272 | -1.482630 |
| 52 | 1 | 0 | 4.030798  | -6.564328 | -2.447136 |
| 53 | 1 | 0 | 2.636715  | -7.339111 | -1.698105 |
| 54 | 6 | 0 | 4.513153  | -7.780853 | -0.706413 |
| 55 | 1 | 0 | 4.691944  | -8.692501 | -1.286305 |
| 56 | 1 | 0 | 5.489397  | -7.297905 | -0.563583 |
| 57 | 7 | 0 | 3.283423  | 0.824178  | -4.468836 |
| 58 | 6 | 0 | 2.347940  | -1.570031 | -3.189853 |
| 59 | 1 | 0 | 3.389438  | -1.290719 | -3.051650 |
| 60 | 6 | 0 | 1.519120  | -0.722639 | -3.938578 |
| 61 | 6 | 0 | 2.055882  | 0.514852  | -4.538406 |
| 62 | 1 | 0 | 1.324812  | 1.147039  | -5.066363 |
| 63 | 6 | 0 | 3.711659  | 2.046067  | -5.119366 |
| 64 | 1 | 0 | 2.862935  | 2.568623  | -5.596971 |
| 65 | 6 | 0 | 4.763696  | 1.708493  | -6.181037 |
| 66 | 1 | 0 | 4.315243  | 1.039661  | -6.923677 |
| 67 | 1 | 0 | 5.573159  | 1.148416  | -5.695165 |
| 68 | 6 | 0 | 5.319175  | 2.970480  | -6.841802 |
| 69 | 1 | 0 | 6.081608  | 2.701961  | -7.580617 |
| 70 | 1 | 0 | 4.514025  | 3.481758  | -7.386998 |
| 71 | 7 | 0 | -2.458634 | -2.082107 | -4.713118 |
| 72 | 6 | 0 | 0.187623  | -1.067243 | -4.140998 |
| 73 | 1 | 0 | -0.470246 | -0.436059 | -4.733111 |
| 74 | 6 | 0 | -0.327028 | -2.255308 | -3.603403 |
| 75 | 6 | 0 | -1.710870 | -2.685328 | -3.885184 |
| 76 | 1 | 0 | -2.038710 | -3.598230 | -3.363067 |
| 77 | 6 | 0 | -3.758195 | -2.662174 | -4.993428 |
| 78 | 1 | 0 | -3.951818 | -3.546826 | -4.360126 |
| 79 | 6 | 0 | -3.801565 | -3.075255 | -6.469564 |
| 80 | 1 | 0 | -3.019421 | -3.820842 | -6.648990 |
| 81 | 1 | 0 | -3.549470 | -2.196926 | -7.077897 |

|     |   |   |           |           |           |
|-----|---|---|-----------|-----------|-----------|
| 82  | 6 | 0 | -5.176218 | -3.613166 | -6.867015 |
| 83  | 1 | 0 | -5.180541 | -3.880376 | -7.928961 |
| 84  | 1 | 0 | -5.384629 | -4.534410 | -6.306109 |
| 85  | 7 | 0 | -5.070334 | -1.161987 | 3.144669  |
| 86  | 6 | 0 | -4.699534 | 0.944908  | 1.234186  |
| 87  | 1 | 0 | -4.696259 | 1.204923  | 2.289314  |
| 88  | 6 | 0 | -4.846865 | -0.403014 | 0.878566  |
| 89  | 6 | 0 | -4.984853 | -1.446783 | 1.913223  |
| 90  | 1 | 0 | -5.008598 | -2.485499 | 1.548055  |
| 91  | 6 | 0 | -5.202464 | -2.254977 | 4.086665  |
| 92  | 1 | 0 | -5.178529 | -3.234681 | 3.576485  |
| 93  | 6 | 0 | -6.526409 | -2.104894 | 4.844058  |
| 94  | 1 | 0 | -7.352203 | -2.151847 | 4.125783  |
| 95  | 1 | 0 | -6.551726 | -1.103903 | 5.294065  |
| 96  | 6 | 0 | -6.678367 | -3.172268 | 5.927889  |
| 97  | 1 | 0 | -7.622894 | -3.029727 | 6.463307  |
| 98  | 1 | 0 | -6.724645 | -4.164791 | 5.459402  |
| 99  | 7 | 0 | 3.313325  | 3.163263  | 3.281923  |
| 100 | 6 | 0 | 2.755952  | 3.337794  | 0.469996  |
| 101 | 1 | 0 | 3.719200  | 2.936643  | 0.775409  |
| 102 | 6 | 0 | 1.830091  | 3.689699  | 1.463120  |
| 103 | 6 | 0 | 2.165615  | 3.534935  | 2.892623  |
| 104 | 1 | 0 | 1.360205  | 3.780035  | 3.602430  |
| 105 | 6 | 0 | 3.546257  | 3.072914  | 4.709479  |
| 106 | 1 | 0 | 2.644589  | 3.353230  | 5.283766  |
| 107 | 6 | 0 | 4.702164  | 4.003207  | 5.091385  |
| 108 | 1 | 0 | 4.430473  | 5.031872  | 4.830576  |
| 109 | 1 | 0 | 5.572799  | 3.737936  | 4.477671  |
| 110 | 6 | 0 | 5.048587  | 3.885490  | 6.575962  |
| 111 | 1 | 0 | 5.888777  | 4.544777  | 6.818195  |
| 112 | 1 | 0 | 4.194415  | 4.224470  | 7.177956  |
| 113 | 7 | 0 | 3.246862  | 3.371369  | -3.137162 |
| 114 | 6 | 0 | 1.198871  | 4.037785  | -1.234131 |
| 115 | 1 | 0 | 0.979580  | 4.175594  | -2.289890 |
| 116 | 6 | 0 | 2.444900  | 3.505215  | -0.874394 |
| 117 | 6 | 0 | 3.438385  | 3.141805  | -1.904866 |
| 118 | 1 | 0 | 4.360775  | 2.669222  | -1.533597 |
| 119 | 6 | 0 | 4.297087  | 2.997348  | -4.063775 |
| 120 | 1 | 0 | 5.116865  | 2.462334  | -3.551429 |
| 121 | 6 | 0 | 4.852293  | 4.260797  | -4.730959 |
| 122 | 1 | 0 | 5.273117  | 4.912810  | -3.957729 |
| 123 | 1 | 0 | 4.014411  | 4.805046  | -5.185981 |
| 124 | 6 | 0 | 5.898572  | 3.921579  | -5.793145 |
| 125 | 1 | 0 | 6.263417  | 4.839649  | -6.265744 |
| 126 | 1 | 0 | 6.764095  | 3.445084  | -5.313038 |
| 127 | 7 | 0 | -4.861276 | -1.358964 | -3.266864 |
| 128 | 6 | 0 | -4.843724 | -0.761940 | -0.467932 |
| 129 | 1 | 0 | -4.963726 | -1.799261 | -0.772801 |
| 130 | 6 | 0 | -4.700920 | 0.218445  | -1.465374 |
| 131 | 6 | 0 | -4.690396 | -0.160889 | -2.891421 |
| 132 | 1 | 0 | -4.530014 | 0.660653  | -3.606260 |
| 133 | 6 | 0 | -4.856688 | -1.632907 | -4.690004 |
| 134 | 1 | 0 | -4.632719 | -0.723926 | -5.276676 |
| 135 | 6 | 0 | -6.232483 | -2.175323 | -5.094122 |
| 136 | 1 | 0 | -6.989682 | -1.413605 | -4.878311 |
| 137 | 1 | 0 | -6.459708 | -3.040205 | -4.457315 |
| 138 | 6 | 0 | -6.267126 | -2.584224 | -6.566681 |
| 139 | 1 | 0 | -7.254642 | -2.983563 | -6.820632 |
| 140 | 1 | 0 | -6.110707 | -1.697582 | -7.196072 |

|     |    |   |           |           |           |
|-----|----|---|-----------|-----------|-----------|
| 141 | 7  | 0 | -4.348707 | 4.265329  | -0.212504 |
| 142 | 6  | 0 | -4.555363 | 1.548190  | -1.099883 |
| 143 | 1  | 0 | -4.436250 | 2.325913  | -1.849539 |
| 144 | 6  | 0 | -4.552807 | 1.918010  | 0.254525  |
| 145 | 6  | 0 | -4.401134 | 3.333998  | 0.645310  |
| 146 | 1  | 0 | -4.346230 | 3.529963  | 1.727109  |
| 147 | 6  | 0 | -4.225483 | 5.626756  | 0.269578  |
| 148 | 1  | 0 | -4.128731 | 5.659866  | 1.369706  |
| 149 | 6  | 0 | -5.466508 | 6.418916  | -0.157314 |
| 150 | 1  | 0 | -6.352228 | 5.957434  | 0.292785  |
| 151 | 1  | 0 | -5.575659 | 6.324021  | -1.245532 |
| 152 | 6  | 0 | -5.355283 | 7.892781  | 0.233189  |
| 153 | 1  | 0 | -6.245735 | 8.436078  | -0.100032 |
| 154 | 1  | 0 | -5.320631 | 7.979181  | 1.327739  |
| 155 | 7  | 0 | -1.790280 | 5.552349  | 0.185556  |
| 156 | 6  | 0 | 0.598200  | 4.216930  | 1.095938  |
| 157 | 1  | 0 | -0.129785 | 4.513660  | 1.846696  |
| 158 | 6  | 0 | 0.280101  | 4.403990  | -0.257626 |
| 159 | 6  | 0 | -0.985113 | 5.052850  | -0.657205 |
| 160 | 1  | 0 | -1.166643 | 5.112558  | -1.741796 |
| 161 | 6  | 0 | -2.954419 | 6.251072  | -0.324982 |
| 162 | 1  | 0 | -3.027720 | 6.166515  | -1.424329 |
| 163 | 6  | 0 | -2.849886 | 7.730526  | 0.064225  |
| 164 | 1  | 0 | -1.944255 | 8.149939  | -0.387260 |
| 165 | 1  | 0 | -2.719844 | 7.789664  | 1.152659  |
| 166 | 6  | 0 | -4.090961 | 8.515591  | -0.360784 |
| 167 | 1  | 0 | -3.995447 | 9.561869  | -0.052095 |
| 168 | 1  | 0 | -4.167697 | 8.512764  | -1.456607 |
| 169 | 53 | 0 | -1.629517 | -1.048799 | -0.115906 |
| 170 | 53 | 0 | 1.087022  | 0.092556  | 0.022739  |
| 171 | 53 | 0 | 4.029206  | -0.368498 | 0.115100  |

5I@CC3 C2 cc3-i5

Standard orientation:

| Center<br>Number | Atomic<br>Number | Atomic<br>Type | Coordinates (Angstroms) |            |           |
|------------------|------------------|----------------|-------------------------|------------|-----------|
|                  |                  |                | X                       | Y          | Z         |
| 1                | 7                | 0              | 0.325225                | -5.541346  | -0.758069 |
| 2                | 6                | 0              | 0.969730                | -3.281626  | -2.427976 |
| 3                | 1                | 0              | 0.074162                | -3.850139  | -2.669750 |
| 4                | 6                | 0              | 1.709553                | -3.642359  | -1.291962 |
| 5                | 6                | 0              | 1.312792                | -4.800469  | -0.466856 |
| 6                | 1                | 0              | 1.955643                | -5.006053  | 0.403703  |
| 7                | 6                | 0              | 0.095240                | -6.712717  | 0.065848  |
| 8                | 1                | 0              | 0.784016                | -6.740622  | 0.929650  |
| 9                | 6                | 0              | 0.308975                | -7.965141  | -0.792981 |
| 10               | 1                | 0              | 1.340757                | -7.967334  | -1.160912 |
| 11               | 1                | 0              | -0.342950               | -7.891773  | -1.673093 |
| 12               | 6                | 0              | -0.000000               | -9.243848  | -0.014116 |
| 13               | 1                | 0              | 0.142328                | -10.117846 | -0.658360 |
| 14               | 1                | 0              | 0.708221                | -9.344206  | 0.819666  |
| 15               | 7                | 0              | 1.017198                | -1.010696  | -5.270822 |
| 16               | 6                | 0              | 2.555636                | -1.529202  | -2.907874 |
| 17               | 1                | 0              | 2.873687                | -0.715651  | -3.556429 |
| 18               | 6                | 0              | 1.385003                | -2.228071  | -3.233081 |
| 19               | 6                | 0              | 0.606017                | -1.871846  | -4.435872 |
| 20               | 1                | 0              | -0.345900               | -2.409729  | -4.568122 |



|    |   |   |            |            |           |
|----|---|---|------------|------------|-----------|
| 21 | 6 | 0 | 0.193425   | -0.743835  | -6.432256 |
| 22 | 1 | 0 | -0.743563  | -1.329191  | -6.407491 |
| 23 | 6 | 0 | 0.980264   | -1.093665  | -7.699830 |
| 24 | 1 | 0 | 1.231119   | -2.159791  | -7.677760 |
| 25 | 1 | 0 | 1.929101   | -0.541999  | -7.677391 |
| 26 | 6 | 0 | 0.194921   | -0.739638  | -8.963136 |
| 27 | 1 | 0 | 0.786741   | -0.981624  | -9.852274 |
| 28 | 1 | 0 | -0.715530  | -1.352557  | -9.010332 |
| 29 | 7 | 0 | 5.333276   | -1.496293  | -0.555603 |
| 30 | 6 | 0 | 2.864035   | -2.936453  | -0.972990 |
| 31 | 1 | 0 | 3.461592   | -3.203364  | -0.104851 |
| 32 | 6 | 0 | 3.297692   | -1.879930  | -1.786509 |
| 33 | 6 | 0 | 4.553222   | -1.159359  | -1.497805 |
| 34 | 1 | 0 | 4.786899   | -0.323916  | -2.176628 |
| 35 | 6 | 0 | 6.581054   | -0.767325  | -0.427500 |
| 36 | 1 | 0 | 6.609676   | 0.107164   | -1.102371 |
| 37 | 6 | 0 | 7.739066   | -1.712557  | -0.771368 |
| 38 | 1 | 0 | 7.619436   | -2.051875  | -1.806030 |
| 39 | 1 | 0 | 7.656591   | -2.601820  | -0.132808 |
| 40 | 6 | 0 | 9.097378   | -1.041744  | -0.566215 |
| 41 | 1 | 0 | 9.901977   | -1.746597  | -0.800829 |
| 42 | 1 | 0 | 9.197841   | -0.199692  | -1.264380 |
| 43 | 7 | 0 | -1.463261  | -5.547076  | 1.517192  |
| 44 | 6 | 0 | -1.737586  | -3.236916  | 3.200137  |
| 45 | 1 | 0 | -0.934884  | -3.935122  | 3.422886  |
| 46 | 6 | 0 | -2.582058  | -3.508684  | 2.117766  |
| 47 | 6 | 0 | -2.371248  | -4.698412  | 1.269087  |
| 48 | 1 | 0 | -3.045470  | -4.794754  | 0.403802  |
| 49 | 6 | 0 | -1.335847  | -6.680205  | 0.621787  |
| 50 | 1 | 0 | -2.025865  | -6.596294  | -0.236870 |
| 51 | 6 | 0 | -1.641329  | -7.965320  | 1.400061  |
| 52 | 1 | 0 | -2.670806  | -7.916778  | 1.771501  |
| 53 | 1 | 0 | -0.985636  | -7.997221  | 2.280056  |
| 54 | 6 | 0 | -1.425576  | -9.209757  | 0.538740  |
| 55 | 1 | 0 | -1.633442  | -10.110983 | 1.125094  |
| 56 | 1 | 0 | -2.137420  | -9.202641  | -0.297795 |
| 57 | 7 | 0 | -5.680914  | -0.728223  | 1.264053  |
| 58 | 6 | 0 | -3.613806  | -2.624595  | 1.812610  |
| 59 | 1 | 0 | -4.281108  | -2.814485  | 0.974396  |
| 60 | 6 | 0 | -3.802788  | -1.458199  | 2.567069  |
| 61 | 6 | 0 | -4.877923  | -0.507673  | 2.218976  |
| 62 | 1 | 0 | -4.940373  | 0.398353   | 2.841124  |
| 63 | 6 | 0 | -6.722394  | 0.247068   | 1.010241  |
| 64 | 1 | 0 | -6.635693  | 1.116100   | 1.687093  |
| 65 | 6 | 0 | -8.086625  | -0.422559  | 1.211629  |
| 66 | 1 | 0 | -8.160229  | -0.770577  | 2.247796  |
| 67 | 1 | 0 | -8.128026  | -1.313764  | 0.572021  |
| 68 | 6 | 0 | -9.235199  | 0.525470   | 0.866779  |
| 69 | 1 | 0 | -10.194667 | 0.015287   | 1.002162  |
| 70 | 1 | 0 | -9.226862  | 1.377445   | 1.560253  |
| 71 | 7 | 0 | -1.197711  | -0.822579  | 5.876292  |
| 72 | 6 | 0 | -2.957249  | -1.192802  | 3.635389  |
| 73 | 1 | 0 | -3.076153  | -0.295278  | 4.237096  |
| 74 | 6 | 0 | -1.921717  | -2.088073  | 3.964123  |
| 75 | 6 | 0 | -1.039386  | -1.827296  | 5.119084  |
| 76 | 1 | 0 | -0.243828  | -2.569152  | 5.289768  |
| 77 | 6 | 0 | -0.322083  | -0.696292  | 7.026253  |
| 78 | 1 | 0 | 0.493070   | -1.441254  | 6.996694  |
| 79 | 6 | 0 | -1.154772  | -0.905070  | 8.297692  |

|     |   |   |           |           |           |
|-----|---|---|-----------|-----------|-----------|
| 80  | 1 | 0 | -1.586545 | -1.911578 | 8.273782  |
| 81  | 1 | 0 | -1.993941 | -0.197568 | 8.277853  |
| 82  | 6 | 0 | -0.319440 | -0.694663 | 9.560564  |
| 83  | 1 | 0 | -0.944877 | -0.831336 | 10.448888 |
| 84  | 1 | 0 | 0.470924  | -1.456057 | 9.607117  |
| 85  | 7 | 0 | 5.680914  | 0.728223  | 1.264053  |
| 86  | 6 | 0 | 3.613806  | 2.624595  | 1.812610  |
| 87  | 1 | 0 | 4.281108  | 2.814485  | 0.974396  |
| 88  | 6 | 0 | 3.802788  | 1.458199  | 2.567069  |
| 89  | 6 | 0 | 4.877923  | 0.507673  | 2.218976  |
| 90  | 1 | 0 | 4.940373  | -0.398353 | 2.841124  |
| 91  | 6 | 0 | 6.722394  | -0.247068 | 1.010241  |
| 92  | 1 | 0 | 6.635693  | -1.116100 | 1.687093  |
| 93  | 6 | 0 | 8.086625  | 0.422559  | 1.211629  |
| 94  | 1 | 0 | 8.160229  | 0.770577  | 2.247796  |
| 95  | 1 | 0 | 8.128026  | 1.313764  | 0.572021  |
| 96  | 6 | 0 | 9.235199  | -0.525470 | 0.866779  |
| 97  | 1 | 0 | 10.194667 | -0.015287 | 1.002162  |
| 98  | 1 | 0 | 9.226862  | -1.377445 | 1.560253  |
| 99  | 7 | 0 | -1.017198 | 1.010696  | -5.270822 |
| 100 | 6 | 0 | -2.555636 | 1.529202  | -2.907874 |
| 101 | 1 | 0 | -2.873687 | 0.715651  | -3.556429 |
| 102 | 6 | 0 | -1.385003 | 2.228071  | -3.233081 |
| 103 | 6 | 0 | -0.606017 | 1.871846  | -4.435872 |
| 104 | 1 | 0 | 0.345900  | 2.409729  | -4.568122 |
| 105 | 6 | 0 | -0.193425 | 0.743835  | -6.432256 |
| 106 | 1 | 0 | 0.743563  | 1.329191  | -6.407491 |
| 107 | 6 | 0 | -0.980264 | 1.093665  | -7.699830 |
| 108 | 1 | 0 | -1.231119 | 2.159791  | -7.677760 |
| 109 | 1 | 0 | -1.929101 | 0.541999  | -7.677391 |
| 110 | 6 | 0 | -0.194921 | 0.739638  | -8.963136 |
| 111 | 1 | 0 | -0.786741 | 0.981624  | -9.852274 |
| 112 | 1 | 0 | 0.715530  | 1.352557  | -9.010332 |
| 113 | 7 | 0 | -5.333276 | 1.496293  | -0.555603 |
| 114 | 6 | 0 | -2.864035 | 2.936453  | -0.972990 |
| 115 | 1 | 0 | -3.461592 | 3.203364  | -0.104851 |
| 116 | 6 | 0 | -3.297692 | 1.879930  | -1.786509 |
| 117 | 6 | 0 | -4.553222 | 1.159359  | -1.497805 |
| 118 | 1 | 0 | -4.786899 | 0.323916  | -2.176628 |
| 119 | 6 | 0 | -6.581054 | 0.767325  | -0.427500 |
| 120 | 1 | 0 | -6.609676 | -0.107164 | -1.102371 |
| 121 | 6 | 0 | -7.739066 | 1.712557  | -0.771368 |
| 122 | 1 | 0 | -7.619436 | 2.051875  | -1.806030 |
| 123 | 1 | 0 | -7.656591 | 2.601820  | -0.132808 |
| 124 | 6 | 0 | -9.097378 | 1.041744  | -0.566215 |
| 125 | 1 | 0 | -9.901977 | 1.746597  | -0.800829 |
| 126 | 1 | 0 | -9.197841 | 0.199692  | -1.264380 |
| 127 | 7 | 0 | 1.197711  | 0.822579  | 5.876292  |
| 128 | 6 | 0 | 2.957249  | 1.192802  | 3.635389  |
| 129 | 1 | 0 | 3.076153  | 0.295278  | 4.237096  |
| 130 | 6 | 0 | 1.921717  | 2.088073  | 3.964123  |
| 131 | 6 | 0 | 1.039386  | 1.827296  | 5.119084  |
| 132 | 1 | 0 | 0.243828  | 2.569152  | 5.289768  |
| 133 | 6 | 0 | 0.322083  | 0.696292  | 7.026253  |
| 134 | 1 | 0 | -0.493070 | 1.441254  | 6.996694  |
| 135 | 6 | 0 | 1.154772  | 0.905070  | 8.297692  |
| 136 | 1 | 0 | 1.586545  | 1.911578  | 8.273782  |
| 137 | 1 | 0 | 1.993941  | 0.197568  | 8.277853  |
| 138 | 6 | 0 | 0.319440  | 0.694663  | 9.560564  |

|     |    |   |           |           |           |
|-----|----|---|-----------|-----------|-----------|
| 139 | 1  | 0 | 0.944877  | 0.831336  | 10.448888 |
| 140 | 1  | 0 | -0.470924 | 1.456057  | 9.607117  |
| 141 | 7  | 0 | 1.463261  | 5.547076  | 1.517192  |
| 142 | 6  | 0 | 1.737586  | 3.236916  | 3.200137  |
| 143 | 1  | 0 | 0.934884  | 3.935122  | 3.422886  |
| 144 | 6  | 0 | 2.582058  | 3.508684  | 2.117766  |
| 145 | 6  | 0 | 2.371248  | 4.698412  | 1.269087  |
| 146 | 1  | 0 | 3.045470  | 4.794754  | 0.403802  |
| 147 | 6  | 0 | 1.335847  | 6.680205  | 0.621787  |
| 148 | 1  | 0 | 2.025865  | 6.596294  | -0.236870 |
| 149 | 6  | 0 | 1.641329  | 7.965320  | 1.400061  |
| 150 | 1  | 0 | 2.670806  | 7.916778  | 1.771501  |
| 151 | 1  | 0 | 0.985636  | 7.997221  | 2.280056  |
| 152 | 6  | 0 | 1.425576  | 9.209757  | 0.538740  |
| 153 | 1  | 0 | 1.633442  | 10.110983 | 1.125094  |
| 154 | 1  | 0 | 2.137420  | 9.202641  | -0.297795 |
| 155 | 7  | 0 | -0.325225 | 5.541346  | -0.758069 |
| 156 | 6  | 0 | -0.969730 | 3.281626  | -2.427976 |
| 157 | 1  | 0 | -0.074162 | 3.850139  | -2.669750 |
| 158 | 6  | 0 | -1.709553 | 3.642359  | -1.291962 |
| 159 | 6  | 0 | -1.312792 | 4.800469  | -0.466856 |
| 160 | 1  | 0 | -1.955643 | 5.006053  | 0.403703  |
| 161 | 6  | 0 | -0.095240 | 6.712717  | 0.065848  |
| 162 | 1  | 0 | -0.784016 | 6.740622  | 0.929650  |
| 163 | 6  | 0 | -0.308975 | 7.965141  | -0.792981 |
| 164 | 1  | 0 | -1.340757 | 7.967334  | -1.160912 |
| 165 | 1  | 0 | 0.342950  | 7.891773  | -1.673093 |
| 166 | 6  | 0 | 0.000000  | 9.243848  | -0.014116 |
| 167 | 1  | 0 | -0.142328 | 10.117846 | -0.658360 |
| 168 | 1  | 0 | -0.708221 | 9.344206  | 0.819666  |
| 169 | 53 | 0 | 0.000000  | 0.000000  | 2.090584  |
| 170 | 53 | 0 | -1.435347 | -1.214754 | -0.524468 |
| 171 | 53 | 0 | 1.435347  | 1.214754  | -0.524468 |
| 172 | 53 | 0 | 3.121137  | 2.656373  | -2.365017 |
| 173 | 53 | 0 | -3.121137 | -2.656373 | -2.365017 |

7I@CC3 C1 cc3-i7

Standard orientation:

| Center<br>Number | Atomic<br>Number | Atomic<br>Type | Coordinates (Angstroms) |           |           |
|------------------|------------------|----------------|-------------------------|-----------|-----------|
|                  |                  |                | X                       | Y         | Z         |
| 1                | 7                | 0              | -3.310098               | 0.175788  | -4.617978 |
| 2                | 6                | 0              | -0.586007               | 0.897699  | -4.056050 |
| 3                | 1                | 0              | -1.292109               | 1.697878  | -4.267042 |
| 4                | 6                | 0              | -1.059520               | -0.421206 | -4.014786 |
| 5                | 6                | 0              | -2.482580               | -0.719831 | -4.269208 |
| 6                | 1                | 0              | -2.777398               | -1.774986 | -4.154060 |
| 7                | 6                | 0              | -4.676094               | -0.231739 | -4.877851 |
| 8                | 1                | 0              | -4.814804               | -1.314082 | -4.702709 |
| 9                | 6                | 0              | -5.033596               | 0.098132  | -6.330881 |
| 10               | 1                | 0              | -4.358385               | -0.451947 | -6.995273 |
| 11               | 1                | 0              | -4.843943               | 1.166626  | -6.496689 |
| 12               | 6                | 0              | -6.495069               | -0.231379 | -6.636693 |
| 13               | 1                | 0              | -6.729630               | 0.031504  | -7.673602 |
| 14               | 1                | 0              | -6.652751               | -1.314201 | -6.539522 |
| 15               | 7                | 0              | 2.476282                | 2.849490  | -3.750170 |
| 16               | 6                | 0              | 1.647697                | 0.111019  | -3.601725 |

|    |   |   |           |           |           |
|----|---|---|-----------|-----------|-----------|
| 17 | 1 | 0 | 2.703230  | 0.339576  | -3.472931 |
| 18 | 6 | 0 | 0.761197  | 1.168098  | -3.846648 |
| 19 | 6 | 0 | 1.251553  | 2.558825  | -3.905850 |
| 20 | 1 | 0 | 0.489645  | 3.328011  | -4.107609 |
| 21 | 6 | 0 | 2.862941  | 4.239959  | -3.882284 |
| 22 | 1 | 0 | 1.979469  | 4.900176  | -3.953529 |
| 23 | 6 | 0 | 3.718498  | 4.398594  | -5.145238 |
| 24 | 1 | 0 | 3.121070  | 4.102870  | -6.014562 |
| 25 | 1 | 0 | 4.558186  | 3.694077  | -5.080373 |
| 26 | 6 | 0 | 4.239778  | 5.827874  | -5.296823 |
| 27 | 1 | 0 | 4.861694  | 5.905992  | -6.194820 |
| 28 | 1 | 0 | 3.391993  | 6.512458  | -5.436085 |
| 29 | 7 | 0 | 1.836410  | -3.518398 | -3.351296 |
| 30 | 6 | 0 | -0.172643 | -1.462358 | -3.765442 |
| 31 | 1 | 0 | -0.515685 | -2.494630 | -3.752853 |
| 32 | 6 | 0 | 1.189720  | -1.200562 | -3.558781 |
| 33 | 6 | 0 | 2.162670  | -2.291786 | -3.362364 |
| 34 | 1 | 0 | 3.212228  | -1.971540 | -3.263229 |
| 35 | 6 | 0 | 2.917556  | -4.486249 | -3.284673 |
| 36 | 1 | 0 | 3.880893  | -3.996870 | -3.052823 |
| 37 | 6 | 0 | 3.023315  | -5.190829 | -4.643466 |
| 38 | 1 | 0 | 3.240012  | -4.439513 | -5.410570 |
| 39 | 1 | 0 | 2.041904  | -5.619658 | -4.884967 |
| 40 | 6 | 0 | 4.088935  | -6.286951 | -4.631404 |
| 41 | 1 | 0 | 4.125302  | -6.784004 | -5.606493 |
| 42 | 1 | 0 | 5.076280  | -5.834401 | -4.467295 |
| 43 | 7 | 0 | -5.303223 | 0.100275  | -2.557380 |
| 44 | 6 | 0 | -4.580273 | -0.641089 | 0.119653  |
| 45 | 1 | 0 | -4.766738 | -1.437414 | -0.597826 |
| 46 | 6 | 0 | -4.654971 | 0.687870  | -0.319105 |
| 47 | 6 | 0 | -4.977813 | 0.999803  | -1.725453 |
| 48 | 1 | 0 | -4.925101 | 2.064028  | -2.004233 |
| 49 | 6 | 0 | -5.612556 | 0.511085  | -3.911791 |
| 50 | 1 | 0 | -5.446051 | 1.594301  | -4.053924 |
| 51 | 6 | 0 | -7.075872 | 0.176193  | -4.220685 |
| 52 | 1 | 0 | -7.719402 | 0.726593  | -3.525664 |
| 53 | 1 | 0 | -7.232502 | -0.892222 | -4.022896 |
| 54 | 6 | 0 | -7.430106 | 0.500834  | -5.672350 |
| 55 | 1 | 0 | -8.473604 | 0.234936  | -5.871678 |
| 56 | 1 | 0 | -7.340813 | 1.583483  | -5.835856 |
| 57 | 7 | 0 | -4.079784 | 3.754296  | 2.584106  |
| 58 | 6 | 0 | -4.435687 | 1.720786  | 0.583739  |
| 59 | 1 | 0 | -4.500273 | 2.760545  | 0.270615  |
| 60 | 6 | 0 | -4.129418 | 1.440760  | 1.923115  |
| 61 | 6 | 0 | -3.933291 | 2.533711  | 2.895609  |
| 62 | 1 | 0 | -3.680825 | 2.221142  | 3.921111  |
| 63 | 6 | 0 | -3.934344 | 4.742961  | 3.634094  |
| 64 | 1 | 0 | -3.668886 | 4.272722  | 4.598308  |
| 65 | 6 | 0 | -5.256691 | 5.503187  | 3.786231  |
| 66 | 1 | 0 | -6.043174 | 4.791682  | 4.060236  |
| 67 | 1 | 0 | -5.528203 | 5.916573  | 2.806220  |
| 68 | 6 | 0 | -5.145956 | 6.625503  | 4.818331  |
| 69 | 1 | 0 | -6.097904 | 7.161811  | 4.891430  |
| 70 | 1 | 0 | -4.947304 | 6.193292  | 5.808615  |
| 71 | 7 | 0 | -4.213219 | -2.661698 | 3.121759  |
| 72 | 6 | 0 | -4.054917 | 0.118893  | 2.348240  |
| 73 | 1 | 0 | -3.837070 | -0.123447 | 3.385502  |
| 74 | 6 | 0 | -4.291863 | -0.929916 | 1.448215  |
| 75 | 6 | 0 | -4.309370 | -2.335862 | 1.899546  |

|     |   |   |           |           |           |
|-----|---|---|-----------|-----------|-----------|
| 76  | 1 | 0 | -4.461594 | -3.086356 | 1.106793  |
| 77  | 6 | 0 | -4.373041 | -4.064162 | 3.457271  |
| 78  | 1 | 0 | -4.407556 | -4.696074 | 2.551390  |
| 79  | 6 | 0 | -5.681461 | -4.227919 | 4.241576  |
| 80  | 1 | 0 | -6.513027 | -3.905527 | 3.605673  |
| 81  | 1 | 0 | -5.653383 | -3.544186 | 5.100053  |
| 82  | 6 | 0 | -5.880500 | -5.665609 | 4.720902  |
| 83  | 1 | 0 | -6.811454 | -5.743707 | 5.292160  |
| 84  | 1 | 0 | -5.982912 | -6.330054 | 3.852219  |
| 85  | 7 | 0 | 2.662059  | -4.823559 | -0.893868 |
| 86  | 6 | 0 | 2.620383  | -3.483423 | 1.640272  |
| 87  | 1 | 0 | 3.523075  | -3.404396 | 1.040516  |
| 88  | 6 | 0 | 1.566772  | -4.276951 | 1.168926  |
| 89  | 6 | 0 | 1.646129  | -4.942316 | -0.145520 |
| 90  | 1 | 0 | 0.761479  | -5.526605 | -0.443203 |
| 91  | 6 | 0 | 2.640081  | -5.506361 | -2.172972 |
| 92  | 1 | 0 | 1.651526  | -5.958167 | -2.370319 |
| 93  | 6 | 0 | 3.711862  | -6.603444 | -2.164796 |
| 94  | 1 | 0 | 3.478419  | -7.319600 | -1.369237 |
| 95  | 1 | 0 | 4.673962  | -6.141557 | -1.907514 |
| 96  | 6 | 0 | 3.810044  | -7.301208 | -3.521428 |
| 97  | 1 | 0 | 4.593205  | -8.066039 | -3.491997 |
| 98  | 1 | 0 | 2.865516  | -7.819961 | -3.734407 |
| 99  | 7 | 0 | 2.800894  | 4.595534  | -1.474845 |
| 100 | 6 | 0 | 1.156424  | 4.400535  | 0.874500  |
| 101 | 1 | 0 | 0.788814  | 4.997664  | 0.042679  |
| 102 | 6 | 0 | 2.390744  | 3.748383  | 0.736836  |
| 103 | 6 | 0 | 3.171241  | 3.859503  | -0.511690 |
| 104 | 1 | 0 | 4.100860  | 3.269487  | -0.548867 |
| 105 | 6 | 0 | 3.661132  | 4.661240  | -2.640620 |
| 106 | 1 | 0 | 4.516992  | 3.968491  | -2.547778 |
| 107 | 6 | 0 | 4.180131  | 6.095492  | -2.795388 |
| 108 | 1 | 0 | 4.752203  | 6.362914  | -1.900235 |
| 109 | 1 | 0 | 3.315650  | 6.771049  | -2.835496 |
| 110 | 6 | 0 | 5.029251  | 6.251524  | -4.057136 |
| 111 | 1 | 0 | 5.370150  | 7.287798  | -4.153139 |
| 112 | 1 | 0 | 5.928750  | 5.626919  | -3.970987 |
| 113 | 7 | 0 | -1.547799 | 4.971887  | 3.244813  |
| 114 | 6 | 0 | 0.920292  | 3.507976  | 3.102910  |
| 115 | 1 | 0 | 0.331126  | 3.422602  | 4.012647  |
| 116 | 6 | 0 | 0.421640  | 4.285574  | 2.050658  |
| 117 | 6 | 0 | -0.873706 | 4.983801  | 2.171307  |
| 118 | 1 | 0 | -1.212608 | 5.522200  | 1.272266  |
| 119 | 6 | 0 | -2.796150 | 5.708146  | 3.268143  |
| 120 | 1 | 0 | -3.030439 | 6.139583  | 2.278258  |
| 121 | 6 | 0 | -2.691375 | 6.833549  | 4.303917  |
| 122 | 1 | 0 | -1.882828 | 7.511003  | 4.008410  |
| 123 | 1 | 0 | -2.399982 | 6.388730  | 5.264374  |
| 124 | 6 | 0 | -4.013384 | 7.586768  | 4.453050  |
| 125 | 1 | 0 | -3.913772 | 8.370776  | 5.211090  |
| 126 | 1 | 0 | -4.256743 | 8.088149  | 3.506427  |
| 127 | 7 | 0 | -1.981461 | -4.484185 | 3.486173  |
| 128 | 6 | 0 | 0.399888  | -4.398754 | 1.924836  |
| 129 | 1 | 0 | -0.425590 | -5.016295 | 1.577486  |
| 130 | 6 | 0 | 0.254085  | -3.703281 | 3.128322  |
| 131 | 6 | 0 | -1.006893 | -3.783598 | 3.891837  |
| 132 | 1 | 0 | -1.048905 | -3.198651 | 4.823370  |
| 133 | 6 | 0 | -3.178706 | -4.531606 | 4.300992  |
| 134 | 1 | 0 | -3.102087 | -3.857543 | 5.172862  |

|     |    |   |           |           |           |
|-----|----|---|-----------|-----------|-----------|
| 135 | 6  | 0 | -3.385763 | -5.972298 | 4.784193  |
| 136 | 1  | 0 | -2.524373 | -6.267483 | 5.393296  |
| 137 | 1  | 0 | -3.395477 | -6.629460 | 3.904930  |
| 138 | 6  | 0 | -4.690551 | -6.122886 | 5.565989  |
| 139 | 1  | 0 | -4.818320 | -7.163524 | 5.881915  |
| 140 | 1  | 0 | -4.641735 | -5.515930 | 6.480339  |
| 141 | 7  | 0 | 3.536940  | -1.343620 | 4.440125  |
| 142 | 6  | 0 | 1.295212  | -2.895244 | 3.578722  |
| 143 | 1  | 0 | 1.218613  | -2.348533 | 4.515536  |
| 144 | 6  | 0 | 2.495454  | -2.796487 | 2.841363  |
| 145 | 6  | 0 | 3.610801  | -1.967158 | 3.338150  |
| 146 | 1  | 0 | 4.506263  | -1.932349 | 2.699528  |
| 147 | 6  | 0 | 4.704296  | -0.601929 | 4.879316  |
| 148 | 1  | 0 | 5.461022  | -0.530962 | 4.078155  |
| 149 | 6  | 0 | 5.312137  | -1.318618 | 6.092070  |
| 150 | 1  | 0 | 5.616747  | -2.326560 | 5.789764  |
| 151 | 1  | 0 | 4.527565  | -1.435673 | 6.851030  |
| 152 | 6  | 0 | 6.492442  | -0.538562 | 6.671892  |
| 153 | 1  | 0 | 6.892314  | -1.062965 | 7.546029  |
| 154 | 1  | 0 | 7.300567  | -0.494314 | 5.929342  |
| 155 | 7  | 0 | 3.818181  | 1.514374  | 4.062810  |
| 156 | 6  | 0 | 2.885594  | 2.995370  | 1.792484  |
| 157 | 1  | 0 | 3.845428  | 2.491343  | 1.718262  |
| 158 | 6  | 0 | 2.150965  | 2.867545  | 2.982045  |
| 159 | 6  | 0 | 2.682590  | 2.077343  | 4.109581  |
| 160 | 1  | 0 | 2.038208  | 2.019627  | 5.001032  |
| 161 | 6  | 0 | 4.282682  | 0.825203  | 5.251233  |
| 162 | 1  | 0 | 3.484927  | 0.749039  | 6.011915  |
| 163 | 6  | 0 | 5.468608  | 1.602324  | 5.836361  |
| 164 | 1  | 0 | 5.130763  | 2.609141  | 6.104889  |
| 165 | 1  | 0 | 6.224555  | 1.718788  | 5.048979  |
| 166 | 6  | 0 | 6.071814  | 0.884209  | 7.043534  |
| 167 | 1  | 0 | 6.927139  | 1.450723  | 7.426149  |
| 168 | 1  | 0 | 5.329830  | 0.842301  | 7.852491  |
| 169 | 53 | 0 | 0.528284  | -0.142684 | 2.016137  |
| 170 | 53 | 0 | -0.862265 | 1.672650  | -0.380119 |
| 171 | 53 | 0 | 3.232922  | -0.175240 | -0.100008 |
| 172 | 53 | 0 | -1.033555 | -2.104312 | -0.162821 |
| 173 | 53 | 0 | -2.261588 | -4.243541 | -1.621030 |
| 174 | 53 | 0 | -1.917271 | 3.933466  | -1.770571 |
| 175 | 53 | 0 | 5.483155  | -0.041787 | -1.853039 |

9I@CC3 C2 cc3-i9a

Standard orientation:

| Center<br>Number | Atomic<br>Number | Atomic<br>Type | Coordinates (Angstroms) |          |           |
|------------------|------------------|----------------|-------------------------|----------|-----------|
|                  |                  |                | X                       | Y        | Z         |
| 1                | 7                | 0              | -0.021128               | 1.432798 | -5.849707 |
| 2                | 6                | 0              | -0.748723               | 2.890364 | -3.486848 |
| 3                | 1                | 0              | -1.549675               | 2.520858 | -4.123746 |
| 4                | 6                | 0              | 0.574374                | 2.557860 | -3.811754 |
| 5                | 6                | 0              | 0.874769                | 1.750476 | -5.010528 |
| 6                | 1                | 0              | 1.929293                | 1.460717 | -5.141707 |
| 7                | 6                | 0              | 0.380573                | 0.667170 | -7.012040 |
| 8                | 1                | 0              | 1.459900                | 0.430854 | -6.987871 |
| 9                | 6                | 0              | 0.061950                | 1.467506 | -8.279223 |
| 10               | 1                | 0              | 0.627058                | 2.405664 | -8.257068 |

|    |   |   |           |           |            |
|----|---|---|-----------|-----------|------------|
| 11 | 1 | 0 | -1.002373 | 1.735469  | -8.256756  |
| 12 | 6 | 0 | 0.376799  | 0.665671  | -9.542506  |
| 13 | 1 | 0 | 0.122274  | 1.252112  | -10.431626 |
| 14 | 1 | 0 | 1.456441  | 0.468257  | -9.589759  |
| 15 | 7 | 0 | -2.708210 | 4.813383  | -1.089099  |
| 16 | 6 | 0 | 0.036973  | 4.176347  | -1.605149  |
| 17 | 1 | 0 | -0.192940 | 4.832515  | -0.769735  |
| 18 | 6 | 0 | -1.021523 | 3.693841  | -2.386011  |
| 19 | 6 | 0 | -2.415094 | 4.060285  | -2.067036  |
| 20 | 1 | 0 | -3.184581 | 3.655803  | -2.743587  |
| 21 | 6 | 0 | -4.099968 | 5.178138  | -0.912310  |
| 22 | 1 | 0 | -4.757492 | 4.600695  | -1.587388  |
| 23 | 6 | 0 | -4.256710 | 6.675094  | -1.207870  |
| 24 | 1 | 0 | -3.956407 | 6.861904  | -2.244636  |
| 25 | 1 | 0 | -3.554382 | 7.225468  | -0.567850  |
| 26 | 6 | 0 | -5.686834 | 7.152916  | -0.955344  |
| 27 | 1 | 0 | -5.762998 | 8.226973  | -1.154741  |
| 28 | 1 | 0 | -6.368528 | 6.649972  | -1.654673  |
| 29 | 7 | 0 | 3.666760  | 4.181650  | -1.330025  |
| 30 | 6 | 0 | 1.616122  | 3.027421  | -3.019553  |
| 31 | 1 | 0 | 2.650690  | 2.790255  | -3.259080  |
| 32 | 6 | 0 | 1.350730  | 3.844374  | -1.911021  |
| 33 | 6 | 0 | 2.441196  | 4.404392  | -1.090121  |
| 34 | 1 | 0 | 2.120235  | 5.059307  | -0.263921  |
| 35 | 6 | 0 | 4.642096  | 4.867389  | -0.502628  |
| 36 | 1 | 0 | 4.157361  | 5.389394  | 0.342297   |
| 37 | 6 | 0 | 5.389822  | 5.889771  | -1.367371  |
| 38 | 1 | 0 | 4.666620  | 6.613088  | -1.759435  |
| 39 | 1 | 0 | 5.814802  | 5.362739  | -2.231593  |
| 40 | 6 | 0 | 6.497651  | 6.591305  | -0.581206  |
| 41 | 1 | 0 | 7.025493  | 7.298724  | -1.229357  |
| 42 | 1 | 0 | 6.051731  | 7.177496  | 0.233731   |
| 43 | 7 | 0 | 0.021128  | -1.432798 | -5.849707  |
| 44 | 6 | 0 | 0.748723  | -2.890364 | -3.486848  |
| 45 | 1 | 0 | 1.549675  | -2.520858 | -4.123746  |
| 46 | 6 | 0 | -0.574374 | -2.557860 | -3.811754  |
| 47 | 6 | 0 | -0.874769 | -1.750476 | -5.010528  |
| 48 | 1 | 0 | -1.929293 | -1.460717 | -5.141707  |
| 49 | 6 | 0 | -0.380573 | -0.667170 | -7.012040  |
| 50 | 1 | 0 | -1.459900 | -0.430854 | -6.987871  |
| 51 | 6 | 0 | -0.061950 | -1.467506 | -8.279223  |
| 52 | 1 | 0 | -0.627058 | -2.405664 | -8.257068  |
| 53 | 1 | 0 | 1.002373  | -1.735469 | -8.256756  |
| 54 | 6 | 0 | -0.376799 | -0.665671 | -9.542506  |
| 55 | 1 | 0 | -0.122274 | -1.252112 | -10.431626 |
| 56 | 1 | 0 | -1.456441 | -0.468257 | -9.589759  |
| 57 | 7 | 0 | -3.666760 | -4.181650 | -1.330025  |
| 58 | 6 | 0 | -1.616122 | -3.027421 | -3.019553  |
| 59 | 1 | 0 | -2.650690 | -2.790255 | -3.259080  |
| 60 | 6 | 0 | -1.350730 | -3.844374 | -1.911021  |
| 61 | 6 | 0 | -2.441196 | -4.404392 | -1.090121  |
| 62 | 1 | 0 | -2.120235 | -5.059307 | -0.263921  |
| 63 | 6 | 0 | -4.642096 | -4.867389 | -0.502628  |
| 64 | 1 | 0 | -4.157361 | -5.389394 | 0.342297   |
| 65 | 6 | 0 | -5.389822 | -5.889771 | -1.367371  |
| 66 | 1 | 0 | -4.666620 | -6.613088 | -1.759435  |
| 67 | 1 | 0 | -5.814802 | -5.362739 | -2.231593  |
| 68 | 6 | 0 | -6.497651 | -6.591305 | -0.581206  |
| 69 | 1 | 0 | -7.025493 | -7.298724 | -1.229357  |

|     |   |   |           |           |           |
|-----|---|---|-----------|-----------|-----------|
| 70  | 1 | 0 | -6.051731 | -7.177496 | 0.233731  |
| 71  | 7 | 0 | 2.708210  | -4.813383 | -1.089099 |
| 72  | 6 | 0 | -0.036973 | -4.176347 | -1.605149 |
| 73  | 1 | 0 | 0.192940  | -4.832515 | -0.769735 |
| 74  | 6 | 0 | 1.021523  | -3.693841 | -2.386011 |
| 75  | 6 | 0 | 2.415094  | -4.060285 | -2.067036 |
| 76  | 1 | 0 | 3.184581  | -3.655803 | -2.743587 |
| 77  | 6 | 0 | 4.099968  | -5.178138 | -0.912310 |
| 78  | 1 | 0 | 4.757492  | -4.600695 | -1.587388 |
| 79  | 6 | 0 | 4.256710  | -6.675094 | -1.207870 |
| 80  | 1 | 0 | 3.956407  | -6.861904 | -2.244636 |
| 81  | 1 | 0 | 3.554382  | -7.225468 | -0.567850 |
| 82  | 6 | 0 | 5.686834  | -7.152916 | -0.955344 |
| 83  | 1 | 0 | 5.762998  | -8.226973 | -1.154741 |
| 84  | 1 | 0 | 6.368528  | -6.649972 | -1.654673 |
| 85  | 7 | 0 | 4.903423  | 2.960729  | 0.981822  |
| 86  | 6 | 0 | 3.486322  | 1.137549  | 2.693526  |
| 87  | 1 | 0 | 3.408882  | 2.199226  | 2.914325  |
| 88  | 6 | 0 | 4.250046  | 0.731748  | 1.593711  |
| 89  | 6 | 0 | 4.933996  | 1.718318  | 0.734031  |
| 90  | 1 | 0 | 5.473122  | 1.305659  | -0.133230 |
| 91  | 6 | 0 | 5.623844  | 3.845141  | 0.086695  |
| 92  | 1 | 0 | 6.069511  | 3.287924  | -0.756848 |
| 93  | 6 | 0 | 6.732230  | 4.552875  | 0.874676  |
| 94  | 1 | 0 | 7.420561  | 3.798995  | 1.272147  |
| 95  | 1 | 0 | 6.273590  | 5.053526  | 1.737266  |
| 96  | 6 | 0 | 7.473170  | 5.571495  | 0.008257  |
| 97  | 1 | 0 | 8.245159  | 6.074174  | 0.600278  |
| 98  | 1 | 0 | 7.988310  | 5.049370  | -0.809472 |
| 99  | 7 | 0 | -4.467766 | 3.438366  | 0.748797  |
| 100 | 6 | 0 | -4.355177 | 0.626599  | 1.290365  |
| 101 | 1 | 0 | -4.946567 | 0.963422  | 0.441121  |
| 102 | 6 | 0 | -3.701440 | 1.588639  | 2.074002  |
| 103 | 6 | 0 | -3.796320 | 3.024549  | 1.740401  |
| 104 | 1 | 0 | -3.251793 | 3.709822  | 2.408409  |
| 105 | 6 | 0 | -4.528803 | 4.870817  | 0.528418  |
| 106 | 1 | 0 | -3.839777 | 5.410161  | 1.203272  |
| 107 | 6 | 0 | -5.964266 | 5.349282  | 0.777298  |
| 108 | 1 | 0 | -6.236034 | 5.125784  | 1.814814  |
| 109 | 1 | 0 | -6.637785 | 4.764463  | 0.137193  |
| 110 | 6 | 0 | -6.117452 | 6.840850  | 0.478633  |
| 111 | 1 | 0 | -7.154318 | 7.150950  | 0.645841  |
| 112 | 1 | 0 | -5.495544 | 7.417925  | 1.176338  |
| 113 | 7 | 0 | -4.903423 | -2.960729 | 0.981822  |
| 114 | 6 | 0 | -3.486322 | -1.137549 | 2.693526  |
| 115 | 1 | 0 | -3.408882 | -2.199226 | 2.914325  |
| 116 | 6 | 0 | -4.250046 | -0.731748 | 1.593711  |
| 117 | 6 | 0 | -4.933996 | -1.718318 | 0.734031  |
| 118 | 1 | 0 | -5.473122 | -1.305659 | -0.133230 |
| 119 | 6 | 0 | -5.623844 | -3.845141 | 0.086695  |
| 120 | 1 | 0 | -6.069511 | -3.287924 | -0.756848 |
| 121 | 6 | 0 | -6.732230 | -4.552875 | 0.874676  |
| 122 | 1 | 0 | -7.420561 | -3.798995 | 1.272147  |
| 123 | 1 | 0 | -6.273590 | -5.053526 | 1.737266  |
| 124 | 6 | 0 | -7.473170 | -5.571495 | 0.008257  |
| 125 | 1 | 0 | -8.245159 | -6.074174 | 0.600278  |
| 126 | 1 | 0 | -7.988310 | -5.049370 | -0.809472 |
| 127 | 7 | 0 | 4.467766  | -3.438366 | 0.748797  |
| 128 | 6 | 0 | 4.355177  | -0.626599 | 1.290365  |



|     |    |   |           |           |           |
|-----|----|---|-----------|-----------|-----------|
| 129 | 1  | 0 | 4.946567  | -0.963422 | 0.441121  |
| 130 | 6  | 0 | 3.701440  | -1.588639 | 2.074002  |
| 131 | 6  | 0 | 3.796320  | -3.024549 | 1.740401  |
| 132 | 1  | 0 | 3.251793  | -3.709822 | 2.408409  |
| 133 | 6  | 0 | 4.528803  | -4.870817 | 0.528418  |
| 134 | 1  | 0 | 3.839777  | -5.410161 | 1.203272  |
| 135 | 6  | 0 | 5.964266  | -5.349282 | 0.777298  |
| 136 | 1  | 0 | 6.236034  | -5.125784 | 1.814814  |
| 137 | 1  | 0 | 6.637785  | -4.764463 | 0.137193  |
| 138 | 6  | 0 | 6.117452  | -6.840850 | 0.478633  |
| 139 | 1  | 0 | 7.154318  | -7.150950 | 0.645841  |
| 140 | 1  | 0 | 5.495544  | -7.417925 | 1.176338  |
| 141 | 7  | 0 | 1.428484  | -0.213910 | 5.381000  |
| 142 | 6  | 0 | 2.946546  | -1.177246 | 3.163771  |
| 143 | 1  | 0 | 2.428020  | -1.898409 | 3.790727  |
| 144 | 6  | 0 | 2.835058  | 0.191309  | 3.480960  |
| 145 | 6  | 0 | 2.032121  | 0.622498  | 4.642140  |
| 146 | 1  | 0 | 1.992225  | 1.707236  | 4.826263  |
| 147 | 6  | 0 | 0.708928  | 0.290275  | 6.535282  |
| 148 | 1  | 0 | 0.622244  | 1.390950  | 6.507027  |
| 149 | 6  | 0 | 1.462059  | -0.128314 | 7.804507  |
| 150 | 1  | 0 | 2.464565  | 0.312730  | 7.780925  |
| 151 | 1  | 0 | 1.591607  | -1.218203 | 7.783828  |
| 152 | 6  | 0 | 0.707531  | 0.288645  | 9.067262  |
| 153 | 1  | 0 | 1.256826  | -0.040368 | 9.955433  |
| 154 | 1  | 0 | 0.651909  | 1.384545  | 9.114356  |
| 155 | 7  | 0 | -1.428484 | 0.213910  | 5.381000  |
| 156 | 6  | 0 | -2.946546 | 1.177246  | 3.163771  |
| 157 | 1  | 0 | -2.428020 | 1.898409  | 3.790727  |
| 158 | 6  | 0 | -2.835058 | -0.191309 | 3.480960  |
| 159 | 6  | 0 | -2.032121 | -0.622498 | 4.642140  |
| 160 | 1  | 0 | -1.992225 | -1.707236 | 4.826263  |
| 161 | 6  | 0 | -0.708928 | -0.290275 | 6.535282  |
| 162 | 1  | 0 | -0.622244 | -1.390950 | 6.507027  |
| 163 | 6  | 0 | -1.462059 | 0.128314  | 7.804507  |
| 164 | 1  | 0 | -2.464565 | -0.312730 | 7.780925  |
| 165 | 1  | 0 | -1.591607 | 1.218203  | 7.783828  |
| 166 | 6  | 0 | -0.707531 | -0.288645 | 9.067262  |
| 167 | 1  | 0 | -1.256826 | 0.040368  | 9.955433  |
| 168 | 1  | 0 | -0.651909 | -1.384545 | 9.114356  |
| 169 | 53 | 0 | -0.000000 | 0.000000  | 1.621400  |
| 170 | 53 | 0 | -1.865411 | 0.154638  | -1.047023 |
| 171 | 53 | 0 | 0.119250  | 3.331211  | 2.085353  |
| 172 | 53 | 0 | 1.865411  | -0.154638 | -1.047023 |
| 173 | 53 | 0 | -0.119250 | -3.331211 | 2.085353  |
| 174 | 53 | 0 | 0.000000  | -6.180529 | 2.227777  |
| 175 | 53 | 0 | -0.000000 | 6.180529  | 2.227777  |
| 176 | 53 | 0 | 4.009335  | -0.316701 | -2.936870 |
| 177 | 53 | 0 | -4.009335 | 0.316701  | -2.936870 |

I2 Dih cc3-i5c

Standard orientation:

| Center<br>Number | Atomic<br>Number | Atomic<br>Type | Coordinates (Angstroms) |          |           |
|------------------|------------------|----------------|-------------------------|----------|-----------|
|                  |                  |                | X                       | Y        | Z         |
| 1                | 53               | 0              | 0.000000                | 0.000000 | 1.409392  |
| 2                | 53               | 0              | 0.000000                | 0.000000 | -1.409392 |

I3 Dih cc3-i3c

Standard orientation:

| Center<br>Number | Atomic<br>Number | Atomic<br>Type | Coordinates (Angstroms) |          |           |
|------------------|------------------|----------------|-------------------------|----------|-----------|
|                  |                  |                | X                       | Y        | Z         |
| 1                | 53               | 0              | 0.000000                | 0.000000 | 0.000000  |
| 2                | 53               | 0              | 0.000000                | 0.000000 | 2.959416  |
| 3                | 53               | 0              | 0.000000                | 0.000000 | -2.959416 |

I3(-) Dih cc3-i3b

Standard orientation:

| Center<br>Number | Atomic<br>Number | Atomic<br>Type | Coordinates (Angstroms) |          |           |
|------------------|------------------|----------------|-------------------------|----------|-----------|
|                  |                  |                | X                       | Y        | Z         |
| 1                | 53               | 0              | 0.000000                | 0.000000 | 0.000000  |
| 2                | 53               | 0              | 0.000000                | 0.000000 | 3.070122  |
| 3                | 53               | 0              | 0.000000                | 0.000000 | -3.070122 |

I5 C1 cc3-i5aa

Standard orientation:

| Center<br>Number | Atomic<br>Number | Atomic<br>Type | Coordinates (Angstroms) |           |           |
|------------------|------------------|----------------|-------------------------|-----------|-----------|
|                  |                  |                | X                       | Y         | Z         |
| 1                | 53               | 0              | 0.559991                | 2.639329  | -0.268915 |
| 2                | 53               | 0              | 3.722923                | -2.028335 | -0.316633 |
| 3                | 53               | 0              | 2.335239                | 0.364093  | 0.612304  |
| 4                | 53               | 0              | -4.367405               | -1.430755 | 0.075925  |
| 5                | 53               | 0              | -2.250747               | 0.455669  | -0.102680 |

I5(-) C2v cc3-i5b

Standard orientation:

| Center<br>Number | Atomic<br>Number | Atomic<br>Type | Coordinates (Angstroms) |           |           |
|------------------|------------------|----------------|-------------------------|-----------|-----------|
|                  |                  |                | X                       | Y         | Z         |
| 1                | 53               | 0              | 0.000000                | 0.000000  | 2.151418  |
| 2                | 53               | 0              | 0.000000                | 5.024827  | -1.367275 |
| 3                | 53               | 0              | 0.000000                | 2.563868  | 0.291566  |
| 4                | 53               | 0              | -0.000000               | -5.024827 | -1.367275 |
| 5                | 53               | 0              | -0.000000               | -2.563868 | 0.291566  |

I7 C1 cc3-i7c

Standard orientation:

| Center<br>Number | Atomic<br>Number | Atomic<br>Type | Coordinates (Angstroms) |           |           |
|------------------|------------------|----------------|-------------------------|-----------|-----------|
|                  |                  |                | X                       | Y         | Z         |
| 1                | 53               | 0              | -0.055594               | -0.938174 | 2.624839  |
| 2                | 53               | 0              | 2.487539                | 0.589454  | 0.640921  |
| 3                | 53               | 0              | -1.173477               | -1.727944 | -0.528541 |

|   |    |   |           |           |           |
|---|----|---|-----------|-----------|-----------|
| 4 | 53 | 0 | -1.889846 | 1.535483  | 0.764179  |
| 5 | 53 | 0 | -3.319164 | 3.098429  | -1.123930 |
| 6 | 53 | 0 | 4.360247  | 1.801310  | -1.117204 |
| 7 | 53 | 0 | -0.409704 | -4.358559 | -1.260265 |

I7(-) C3v cc3-i7b

Standard orientation:

| Center<br>Number | Atomic<br>Number | Atomic<br>Type | Coordinates (Angstroms) |           |           |
|------------------|------------------|----------------|-------------------------|-----------|-----------|
|                  |                  |                | X                       | Y         | Z         |
| 1                | 53               | 0              | 0.000000                | 0.000000  | 1.686387  |
| 2                | 53               | 0              | 0.000000                | 2.940253  | 0.312184  |
| 3                | 53               | 0              | 2.546334                | -1.470127 | 0.312184  |
| 4                | 53               | 0              | -2.546334               | -1.470127 | 0.312184  |
| 5                | 53               | 0              | -4.858044               | -2.804793 | -0.874313 |
| 6                | 53               | 0              | 0.000000                | 5.609587  | -0.874313 |
| 7                | 53               | 0              | 4.858044                | -2.804793 | -0.874313 |

I9 Cs cc3-i9c

Standard orientation:

| Center<br>Number | Atomic<br>Number | Atomic<br>Type | Coordinates (Angstroms) |           |           |
|------------------|------------------|----------------|-------------------------|-----------|-----------|
|                  |                  |                | X                       | Y         | Z         |
| 1                | 53               | 0              | 1.276713                | 2.014354  | -0.000000 |
| 2                | 53               | 0              | -1.832903               | 3.821278  | -0.000000 |
| 3                | 53               | 0              | 1.981139                | -0.779239 | -2.185479 |
| 4                | 53               | 0              | -1.677862               | 0.218470  | -0.000000 |
| 5                | 53               | 0              | 1.981139                | -0.779239 | 2.185479  |
| 6                | 53               | 0              | 1.981139                | -3.337772 | 3.400621  |
| 7                | 53               | 0              | 1.981139                | -3.337772 | -3.400621 |
| 8                | 53               | 0              | -1.175703               | -2.565452 | 0.000000  |
| 9                | 53               | 0              | -4.514801               | 4.745373  | -0.000000 |

I9(-) Td cc3-i9b

Standard orientation:

| Center<br>Number | Atomic<br>Number | Atomic<br>Type | Coordinates (Angstroms) |           |           |
|------------------|------------------|----------------|-------------------------|-----------|-----------|
|                  |                  |                | X                       | Y         | Z         |
| 1                | 53               | 0              | 0.000000                | 0.000000  | 0.000000  |
| 2                | 53               | 0              | 1.902858                | 1.902858  | 1.902858  |
| 3                | 53               | 0              | 1.902858                | -1.902858 | -1.902858 |
| 4                | 53               | 0              | -1.902858               | 1.902858  | -1.902858 |
| 5                | 53               | 0              | -1.902858               | -1.902858 | 1.902858  |
| 6                | 53               | 0              | -3.575494               | -3.575494 | 3.575494  |
| 7                | 53               | 0              | 3.575494                | -3.575494 | -3.575494 |
| 8                | 53               | 0              | -3.575494               | 3.575494  | -3.575494 |
| 9                | 53               | 0              | 3.575494                | 3.575494  | 3.575494  |
